# Supplementary material for: Polypyrimidine tract-binding proteins are essential for B cell development
Source: eLife. 2020 Feb 21;9:e53557. doi: 10.7554/eLife.53557 (PMC7058386; doi:10.7554/eLife.53557)
Supplement: Figure 4—source data 1. — DESeq2 results shown in Figure 4A. Separate tabs show genes with significant differential (padj <0.05) mRNA abundance with a |log2 fold change| > 0.5 for the different pairwise comparisons carried out and also all the results obtained with DESeq2. Additional tabs show genes whose transcripts were bound by PTBP1 clusters at their 3’UTR. [file elife-53557-fig4-data1.xls]

## Sheet: Fig4a P1sKOvsCtrl sig |FC|>0.5
EnsemblGeneID	baseMean	log2FoldChange	lfcSE	pvalue	padj	GeneName
ENSMUSG00000028134	6963.23	4.16497	0.126848	2.33191e-238	3.07253e-234	Ptbp2
ENSMUSG00000023328	87.6928	1.77319	0.547645	3.24335e-05	0.00226108	Ache
ENSMUSG00000041115	321.718	1.75665	0.173746	2.37443e-25	2.60712e-22	Iqsec2
ENSMUSG00000039891	106.83	1.62446	0.381383	8.90001e-07	0.000126093	Txlnb
ENSMUSG00000107136	42.8939	1.55509	0.681279	0.000604339	0.0207905	Gm42466
ENSMUSG00000073557	269.049	1.40944	0.26237	3.80125e-09	1.1383e-06	Ppp1r12b
ENSMUSG00000089762	129.224	1.36876	0.240502	5.63659e-10	2.00723e-07	Ier5l
ENSMUSG00000070372	12928.4	1.36462	0.129115	2.20745e-27	3.2317e-24	Capza1
ENSMUSG00000024403	154.653	1.33715	0.262248	1.37227e-08	3.5453e-06	Atp6v1g2
ENSMUSG00000085379	116.5	1.25358	0.206432	6.48164e-11	2.75491e-08	2310058D17Rik
ENSMUSG00000100455	801.928	1.23999	0.152559	2.04543e-17	1.68441e-14	Gm29170
ENSMUSG00000061411	209.023	1.17561	0.30036	3.689e-06	0.000411918	Nol4l
ENSMUSG00000029016	660.257	1.15777	0.193631	1.12435e-10	4.48922e-08	Clcn6
ENSMUSG00000022768	81.3244	1.15515	0.38064	8.94787e-05	0.00533471	Ccdc116
ENSMUSG00000106022	50.0788	1.11745	0.40508	0.000199343	0.00962105	Gm42929
ENSMUSG00000022562	126.759	1.10507	0.325517	2.39219e-05	0.00180111	Oplah
ENSMUSG00000020882	1149.09	1.1043	0.149366	6.86547e-15	4.76102e-12	Cacnb1
ENSMUSG00000027489	43.8789	1.09527	0.502694	0.000830053	0.0260225	Necab3
ENSMUSG00000006800	717.629	1.08401	0.21203	1.46395e-08	3.70943e-06	Sulf2
ENSMUSG00000039345	1036.18	1.06859	0.117797	6.26732e-21	5.50521e-18	Mettl22
ENSMUSG00000097971	8593.56	1.05874	0.367197	0.000138494	0.00713008	Gm26917
ENSMUSG00000086350	173.493	1.02616	0.223732	2.13556e-07	3.80246e-05	B230369F24Rik
ENSMUSG00000040663	713.977	1.02397	0.12863	8.46981e-17	6.5646e-14	Clcf1
ENSMUSG00000049092	86.0497	0.998046	0.431156	0.000521771	0.018939	Gpr137c
ENSMUSG00000028655	80.3116	0.979942	0.437017	0.00081559	0.0257086	Mfsd2a
ENSMUSG00000024426	527.941	0.978784	0.153894	1.01255e-11	4.94124e-09	Atat1
ENSMUSG00000025262	249.014	0.974204	0.322816	9.2254e-05	0.0054754	Fam120c
ENSMUSG00000055675	206.335	0.964699	0.41568	0.000599004	0.0206609	Kbtbd11
ENSMUSG00000045532	73.8223	0.955418	0.397761	0.000529397	0.0190583	C1ql1
ENSMUSG00000097729	122.71	0.949897	0.433703	0.000851439	0.0264589	2310015A10Rik
ENSMUSG00000097287	185.23	0.929377	0.20771	3.54545e-07	5.69693e-05	D130017N08Rik
ENSMUSG00000048988	104.991	0.901894	0.378371	0.000524663	0.0189917	Elfn1
ENSMUSG00000044694	352.625	0.897143	0.137669	3.85008e-12	2.02914e-09	2010007H06Rik
ENSMUSG00000022519	1183.94	0.876271	0.173634	2.58155e-08	6.29897e-06	Srl
ENSMUSG00000022199	180.12	0.874646	0.289707	9.8093e-05	0.005571	Slc22a17
ENSMUSG00000046329	330.502	0.869612	0.197491	5.15269e-07	7.71498e-05	Slc25a23
ENSMUSG00000041298	622.584	0.85621	0.158838	3.78131e-09	1.1383e-06	Katnal1
ENSMUSG00000048232	178.528	0.837015	0.278058	0.000109078	0.0059389	Fbxo10
ENSMUSG00000038569	100.402	0.836679	0.33999	0.000490061	0.0181888	Rad9b
ENSMUSG00000052676	677.717	0.834781	0.156792	5.13741e-09	1.50423e-06	Zmat1
ENSMUSG00000006369	129.442	0.820586	0.486259	0.00171722	0.0410184	Fbln1
ENSMUSG00000045092	952.675	0.818188	0.21189	4.91346e-06	0.000509762	S1pr1
ENSMUSG00000051396	403.07	0.812186	0.20441	3.04827e-06	0.000346241	Gm45902
ENSMUSG00000054008	504.39	0.811211	0.305889	0.000304954	0.0132173	Ndst1
ENSMUSG00000061894	278.599	0.805636	0.200979	2.8659e-06	0.000331238	Zscan20
ENSMUSG00000021493	800.016	0.802686	0.116967	4.27138e-13	2.55817e-10	Pdlim7
ENSMUSG00000045282	488.72	0.792582	0.178452	4.56554e-07	6.91443e-05	Tmem86b
ENSMUSG00000028634	249.885	0.778997	0.285659	0.000256453	0.0116921	Hivep3
ENSMUSG00000063317	312.29	0.770464	0.295441	0.000344316	0.0144481	Usp31
ENSMUSG00000033400	196.406	0.765724	0.296169	0.000371957	0.0151386	Agl
ENSMUSG00000098183	94.2468	0.757639	0.38252	0.00148798	0.0367965	Gm27010
ENSMUSG00000053175	86.5549	0.757528	0.326449	0.000708887	0.0230624	Bcl3
ENSMUSG00000008496	197.494	0.751568	0.20034	8.43213e-06	0.000805085	Pou2f2
ENSMUSG00000002083	87.5769	0.744599	0.39202	0.00172061	0.0410184	Bbc3
ENSMUSG00000022594	834.998	0.729455	0.15959	2.56065e-07	4.43935e-05	Lynx1
ENSMUSG00000053113	156.337	0.728506	0.286745	0.000415333	0.0162387	Socs3
ENSMUSG00000075269	635.512	0.725281	0.209373	2.46914e-05	0.00182772	Bex6
ENSMUSG00000002944	1084.57	0.710836	0.190374	8.99805e-06	0.000852938	Cd36
ENSMUSG00000052557	232.913	0.677833	0.240396	0.000210395	0.0100078	Gan
ENSMUSG00000052563	197.292	0.676484	0.211041	6.36765e-05	0.00404037	D930048N14Rik
ENSMUSG00000033792	343.393	0.67066	0.367596	0.00198793	0.0453951	Atp7a
ENSMUSG00000098715	75.9446	0.666121	0.282877	0.000700265	0.022895	Gm28053
ENSMUSG00000084347	117.463	0.664038	0.188435	2.14962e-05	0.00167594	Akt2-ps
ENSMUSG00000037622	376.295	0.657749	0.214539	0.000101066	0.00561878	Wdtc1
ENSMUSG00000075602	3149.69	0.656331	0.158597	1.61551e-06	0.000200811	Ly6a
ENSMUSG00000032936	839.156	0.653492	0.146651	4.34593e-07	6.8169e-05	Camkv
ENSMUSG00000047888	428.525	0.651427	0.17702	1.21608e-05	0.00108264	Tnrc6b
ENSMUSG00000074071	132.201	0.645389	0.366575	0.00203043	0.0460463	Fam169b
ENSMUSG00000113211	141.577	0.63476	0.255941	0.000537191	0.0192338	4921525O09Rik
ENSMUSG00000054675	2956.66	0.623619	0.14499	9.82835e-07	0.000132141	Tmem119
ENSMUSG00000036155	847.838	0.622581	0.197142	7.38141e-05	0.00456608	Mgat5
ENSMUSG00000031166	535.115	0.620872	0.262797	0.000644713	0.0217432	Wdr13
ENSMUSG00000029602	754.022	0.619745	0.187808	4.86534e-05	0.00322139	Rasal1
ENSMUSG00000070643	186.404	0.612142	0.20296	0.000123615	0.00654115	Sox13
ENSMUSG00000083161	915.075	0.60932	0.161865	9.60012e-06	0.000890783	Gm11427
ENSMUSG00000060260	474.483	0.606799	0.130102	1.83587e-07	3.40697e-05	Pwwp2b
ENSMUSG00000028464	147.87	0.606168	0.256585	0.000761652	0.0243754	Tpm2
ENSMUSG00000032648	766.131	0.590218	0.149485	4.25438e-06	0.000465103	Pygm
ENSMUSG00000032122	1650.14	0.590142	0.0989141	1.5859e-10	6.14584e-08	Slc37a2
ENSMUSG00000038855	675.92	0.589628	0.161278	1.37138e-05	0.00116576	Itpkb
ENSMUSG00000036948	575.66	0.587043	0.156287	9.6879e-06	0.000892642	BC037034
ENSMUSG00000004105	1145.78	0.584984	0.170236	2.78527e-05	0.00201641	Angptl2
ENSMUSG00000086013	272.118	0.581911	0.174468	4.85714e-05	0.00322139	Gm15706
ENSMUSG00000078517	4340.52	0.567456	0.138004	2.43724e-06	0.000289307	Emc1
ENSMUSG00000075408	825.524	0.562964	0.154862	1.57355e-05	0.00132058	6030408B16Rik
ENSMUSG00000110902	92.2776	0.559399	0.254572	0.00115578	0.0319928	Gm33104
ENSMUSG00000042423	183.601	0.556007	0.235291	0.00079957	0.0253859	Fbrs
ENSMUSG00000026317	445.288	0.553102	0.131151	1.5379e-06	0.000192985	Cln8
ENSMUSG00000028613	854.593	0.54974	0.120976	3.35861e-07	5.53162e-05	Lrp8
ENSMUSG00000074785	478.662	0.548508	0.272852	0.00174468	0.0413452	Plxnc1
ENSMUSG00000053137	750.413	0.548321	0.148577	1.31054e-05	0.00114356	Mapk11
ENSMUSG00000107336	98.5642	0.54785	0.248049	0.00116672	0.0322133	Gm43461
ENSMUSG00000001525	67884.2	0.537338	0.0792835	8.74872e-13	5.01188e-10	Tubb5
ENSMUSG00000029478	443.027	0.533836	0.171136	0.000100742	0.00561878	Ncor2
ENSMUSG00000042744	368.789	0.528944	0.245395	0.00132513	0.0344377	Hectd4
ENSMUSG00000046480	1134.56	0.524955	0.2521	0.00158667	0.0387551	Scn4b
ENSMUSG00000097141	80.2573	0.523287	0.269176	0.00210425	0.0469947	Gm10524
ENSMUSG00000041258	446.383	0.52212	0.2196	0.000831472	0.0260225	Zfp236
ENSMUSG00000021288	3708.09	0.5169	0.0769188	1.50864e-12	8.28242e-10	Klc1
ENSMUSG00000078653	132.728	0.516489	0.239248	0.00137284	0.03492	Cntd1
ENSMUSG00000087574	217.07	0.510303	0.226513	0.00112738	0.0315379	C030037D09Rik
ENSMUSG00000092060	280.85	0.508581	0.21732	0.000894768	0.026673	Bend4
ENSMUSG00000051817	651.793	0.506711	0.142205	2.30568e-05	0.00176626	Sox12
ENSMUSG00000029516	1175.81	0.505447	0.13274	9.14004e-06	0.000860208	Cit
ENSMUSG00000020846	319.334	0.503601	0.256869	0.00205815	0.0464876	Rflnb
ENSMUSG00000029033	1381.96	0.501988	0.14044	2.25617e-05	0.00174785	Acap3
ENSMUSG00000033287	421.254	0.500519	0.138312	1.87897e-05	0.00150044	Kctd17
ENSMUSG00000030615	817.39	-0.508349	0.155864	6.50763e-05	0.00410261	Tmem126a
ENSMUSG00000039018	1086.4	-0.511174	0.102724	4.39708e-08	1.01642e-05	Mtg1
ENSMUSG00000021213	578.59	-0.513474	0.130898	5.47136e-06	0.000554544	Akr1c13
ENSMUSG00000012123	197.421	-0.516722	0.237757	0.00129829	0.034354	Crybg2
ENSMUSG00000025465	2395.77	-0.51712	0.0709829	2.0624e-14	1.35871e-11	Echs1
ENSMUSG00000039167	832.296	-0.530024	0.145312	1.62443e-05	0.00133175	Adgrl4
ENSMUSG00000056666	691.7	-0.533415	0.144698	1.25562e-05	0.00111034	Retsat
ENSMUSG00000032688	659.981	-0.535235	0.247266	0.00129358	0.034354	Malt1
ENSMUSG00000020696	511.947	-0.536879	0.157556	3.68873e-05	0.00251828	Rffl
ENSMUSG00000032415	297.846	-0.537744	0.135309	4.27121e-06	0.000465103	Ube2cbp
ENSMUSG00000034334	175.343	-0.540511	0.256827	0.00139479	0.0353176	Fam151b
ENSMUSG00000035062	424.404	-0.544805	0.126707	1.06017e-06	0.000139687	Zc4h2
ENSMUSG00000056999	21855	-0.548754	0.12665	9.12877e-07	0.000126546	Ide
ENSMUSG00000021710	852.899	-0.552461	0.164824	4.4635e-05	0.00301595	Nln
ENSMUSG00000097352	216.364	-0.554835	0.291782	0.00206706	0.0465445	C920009B18Rik
ENSMUSG00000033429	449.239	-0.556533	0.157643	2.32574e-05	0.00177132	Mcee
ENSMUSG00000034401	3322.06	-0.562606	0.113736	4.67353e-08	1.0617e-05	Spata6
ENSMUSG00000002043	870.743	-0.562834	0.105405	6.14558e-09	1.68696e-06	Trappc6a
ENSMUSG00000002699	355.769	-0.565927	0.307903	0.00228793	0.0498394	Lcp2
ENSMUSG00000030246	207.427	-0.568241	0.280468	0.00159218	0.0387551	Ldhb
ENSMUSG00000082691	2448.76	-0.571948	0.143147	3.78195e-06	0.000418748	Dynlt1-ps1
ENSMUSG00000042265	297.071	-0.574996	0.186297	9.95041e-05	0.00561878	Trem1
ENSMUSG00000034959	397.582	-0.590022	0.128676	2.69043e-07	4.60378e-05	Rubcnl
ENSMUSG00000035142	662.385	-0.590301	0.153666	6.83959e-06	0.000677582	Nubpl
ENSMUSG00000067567	1106.6	-0.597838	0.111995	5.26474e-09	1.508e-06	Hdac8
ENSMUSG00000031521	612.738	-0.598694	0.170253	2.26839e-05	0.00174785	Aga
ENSMUSG00000025188	988.075	-0.599196	0.121302	4.96072e-08	1.10784e-05	Hps1
ENSMUSG00000026767	1090.35	-0.599501	0.100973	1.98564e-10	7.26746e-08	Mindy3
ENSMUSG00000079427	537.715	-0.604228	0.154624	5.13135e-06	0.000524114	Mthfsl
ENSMUSG00000033111	713.99	-0.612847	0.127351	8.88005e-08	1.8572e-05	3830406C13Rik
ENSMUSG00000108722	201.603	-0.61788	0.263976	0.000762195	0.0243754	Gm34225
ENSMUSG00000052572	1760.86	-0.622828	0.134571	1.99774e-07	3.65587e-05	Dlg2
ENSMUSG00000045827	493.951	-0.623373	0.222895	0.000223676	0.0104509	Serpinb9
ENSMUSG00000059883	431.355	-0.624743	0.175092	1.58757e-05	0.00132392	Irak4
ENSMUSG00000116895	51.2943	-0.626853	0.287237	0.00111822	0.031415	Gm3435
ENSMUSG00000052605	188.767	-0.627959	0.295086	0.00115175	0.0319482	Isoc2b
ENSMUSG00000037847	621.976	-0.630067	0.134849	1.72471e-07	3.24639e-05	Nmrk1
ENSMUSG00000019883	114.944	-0.631852	0.247381	0.000451348	0.0171542	Echdc1
ENSMUSG00000029923	253.448	-0.6326	0.161146	4.80555e-06	0.000502523	Rab19
ENSMUSG00000028071	439.238	-0.633884	0.160637	4.36447e-06	0.000468839	Sh2d2a
ENSMUSG00000019832	549.548	-0.637175	0.225474	0.000209799	0.0100078	Rab32
ENSMUSG00000024696	250.377	-0.641871	0.15096	1.16109e-06	0.000151471	Lpxn
ENSMUSG00000021238	431.215	-0.64282	0.250187	0.000415113	0.0162387	Aldh6a1
ENSMUSG00000044149	225.579	-0.649112	0.248345	0.00036297	0.0149921	Nkrf
ENSMUSG00000032366	880.779	-0.661137	0.124967	7.09278e-09	1.90724e-06	Tpm1
ENSMUSG00000072763	349.625	-0.66326	0.23075	0.000177169	0.00880895	5430403G16Rik
ENSMUSG00000030577	1099.21	-0.664641	0.239925	0.00023813	0.0110091	Cd22
ENSMUSG00000062646	403.913	-0.672825	0.190001	1.97646e-05	0.00155939	Ganc
ENSMUSG00000056220	781.651	-0.672919	0.155094	7.92694e-07	0.000114775	Pla2g4a
ENSMUSG00000063320	524.774	-0.675771	0.149746	3.50372e-07	5.69693e-05	1190007I07Rik
ENSMUSG00000028419	1725.03	-0.67813	0.139977	6.68163e-08	1.41995e-05	Chmp5
ENSMUSG00000027478	1160.9	-0.68933	0.170141	2.61914e-06	0.000306671	Dnmt3b
ENSMUSG00000034121	267.938	-0.695591	0.201573	2.70661e-05	0.00197029	Mks1
ENSMUSG00000028214	378.946	-0.709281	0.182078	5.10248e-06	0.000524114	Gem
ENSMUSG00000069805	263.678	-0.722944	0.210009	2.5789e-05	0.0018983	Fbp1
ENSMUSG00000068758	117.875	-0.725232	0.354528	0.00130026	0.034354	Il3ra
ENSMUSG00000001029	1756.85	-0.730603	0.0927042	1.89278e-16	1.38551e-13	Icam2
ENSMUSG00000025656	159.427	-0.749208	0.310945	0.000578952	0.020186	Arhgef9
ENSMUSG00000053168	67.0843	-0.751436	0.433437	0.00227647	0.0498394	9030619P08Rik
ENSMUSG00000022514	634.74	-0.751846	0.150882	2.85523e-08	6.84008e-06	Il1rap
ENSMUSG00000026187	1684.6	-0.758359	0.10534	2.95898e-14	1.85655e-11	Xrcc5
ENSMUSG00000027550	1936.18	-0.760597	0.168613	3.26272e-07	5.4942e-05	Lrrcc1
ENSMUSG00000030742	669.352	-0.76948	0.14171	3.02041e-09	9.94924e-07	Lat
ENSMUSG00000037860	695.611	-0.772216	0.159604	6.27528e-08	1.35546e-05	Aim2
ENSMUSG00000038421	529.012	-0.790115	0.27473	0.000148959	0.00757791	Fcrla
ENSMUSG00000039774	1397.5	-0.811932	0.126552	7.71133e-12	3.90787e-09	Galnt12
ENSMUSG00000027082	514.533	-0.812603	0.242149	2.91688e-05	0.00205523	Tfpi
ENSMUSG00000112063	422.807	-0.81839	0.175063	1.44269e-07	2.79543e-05	Gm32220
ENSMUSG00000078867	50.2014	-0.820016	0.498981	0.00230082	0.049893	Gm14418
ENSMUSG00000063018	161.157	-0.833847	0.197841	1.19594e-06	0.000154487	2010204K13Rik
ENSMUSG00000037370	122.308	-0.862001	0.245006	1.86022e-05	0.00149453	Enpp1
ENSMUSG00000061665	697.05	-0.879171	0.145239	7.48814e-11	3.08324e-08	Cd2ap
ENSMUSG00000079606	130.304	-0.88128	0.452324	0.00141676	0.0356244	Gm595
ENSMUSG00000028573	194.957	-0.890393	0.261917	2.80492e-05	0.00201954	Fggy
ENSMUSG00000096255	1514.43	-0.892255	0.191948	1.60604e-07	3.06685e-05	Dynlt1b
ENSMUSG00000052914	311.885	-0.898168	0.216037	1.43766e-06	0.000182141	Cyp2j6
ENSMUSG00000000365	73.1587	-0.916948	0.525703	0.00190336	0.0441195	Rnf17
ENSMUSG00000024810	125.597	-0.937862	0.426924	0.000837274	0.0261235	Il33
ENSMUSG00000021408	1411.37	-0.939418	0.174265	3.4052e-09	1.09431e-06	Ripk1
ENSMUSG00000003379	38082.3	-0.953985	0.0770996	2.08168e-36	6.85705e-33	Cd79a
ENSMUSG00000032058	4272.66	-0.954993	0.0864426	1.24476e-29	2.7335e-26	Ppp2r1b
ENSMUSG00000029468	191.634	-0.967869	0.196784	4.04623e-08	9.5202e-06	P2rx7
ENSMUSG00000078480	71.7091	-0.970996	0.351119	0.000198436	0.00961245	Mrpl48-ps
ENSMUSG00000079853	61.2232	-1.01716	0.474936	0.00078422	0.0250191	Klra1
ENSMUSG00000097519	129.62	-1.02236	0.416174	0.000411793	0.0161964	4930558J18Rik
ENSMUSG00000012519	895.175	-1.02825	0.162265	1.10867e-11	5.21709e-09	Mlkl
ENSMUSG00000002227	1341.24	-1.03183	0.111038	6.37543e-22	6.00019e-19	Mov10
ENSMUSG00000048489	37.9785	-1.03571	0.607784	0.00178595	0.0420961	8430408G22Rik
ENSMUSG00000028923	2595.52	-1.06235	0.0988424	3.15817e-28	5.20151e-25	Necap2
ENSMUSG00000025271	115.079	-1.12133	0.341614	3.37259e-05	0.00232655	Pfkfb1
ENSMUSG00000040339	706.732	-1.13022	0.278976	2.16633e-06	0.000261868	Fam102b
ENSMUSG00000030533	1424.08	-1.1432	0.1092	6.22831e-27	8.20642e-24	Unc45a
ENSMUSG00000026285	95.8961	-1.16986	0.431281	0.000220954	0.0103605	Pdcd1
ENSMUSG00000035000	9149.18	-1.17515	0.1176	7.51646e-25	7.61822e-22	Dpp4
ENSMUSG00000029456	152.617	-1.18853	0.488988	0.000379855	0.0152127	Acad10
ENSMUSG00000026546	63.7329	-1.29965	0.476301	0.000203982	0.00980898	Cfap45
ENSMUSG00000041679	98.9935	-1.33972	0.429845	6.37824e-05	0.00404037	Lrrc29
ENSMUSG00000104413	903.936	-1.39249	0.125408	5.96033e-30	1.57067e-26	Gm37065
ENSMUSG00000029171	1189.59	-1.41857	0.139021	8.37929e-26	1.00369e-22	Pgm1
ENSMUSG00000028217	120.319	-1.42419	0.428285	2.44718e-05	0.00182169	Cdh17
ENSMUSG00000050545	17.9289	-1.46378	0.584627	0.00037226	0.0151386	Fam228b
ENSMUSG00000054426	457.932	-1.50822	0.137534	2.20288e-29	4.14646e-26	A930005H10Rik
ENSMUSG00000017453	64.0792	-1.55889	0.583543	0.000184817	0.00912769	Pipox
ENSMUSG00000006498	8108.6	-1.97989	0.0656884	8.12592e-201	3.5689e-197	Ptbp1
ENSMUSG00000040554	51.0031	-2.0975	0.498316	8.99858e-07	0.000126133	Aipl1
ENSMUSG00000112969	36.5294	-2.83934	0.482525	1.96488e-10	7.26746e-08	Gm48496
ENSMUSG00000067017	8189.35	-3.74063	0.117646	6.11032e-223	4.02548e-219	Gm3608

## Sheet: Fig4a P1P2dKOvsCtrl sig|FC|>0.5
EnsemblGeneID	baseMean	log2FoldChange	lfcSE	pvalue	padj	GeneName
ENSMUSG00000052305	35.6474	3.38362	0.895113	4.62466e-06	8.27797e-05	Hbb-bs
ENSMUSG00000039891	106.83	3.25162	0.365787	1.25834e-20	2.39585e-18	Txlnb
ENSMUSG00000023328	87.6928	2.92281	0.53097	2.70979e-10	1.32369e-08	Ache
ENSMUSG00000028134	6963.23	2.77283	0.127063	5.70592e-107	1.36575e-103	Ptbp2
ENSMUSG00000069919	31.8539	2.75527	0.908167	8.04492e-05	0.000966949	Hba-a1
ENSMUSG00000036594	1351.29	2.73403	0.245624	2.79348e-30	1.04011e-27	H2-Aa
ENSMUSG00000024065	343.319	2.72344	0.295294	6.98473e-22	1.58147e-19	Ehd3
ENSMUSG00000028655	80.3116	2.61868	0.379142	1.32523e-13	1.13868e-11	Mfsd2a
ENSMUSG00000024610	3036.82	2.59493	0.296565	1.19429e-19	2.15165e-17	Cd74
ENSMUSG00000048332	37.5081	2.51374	1.10739	0.000158802	0.001684	Lhfp
ENSMUSG00000056481	63.6236	2.48713	0.417255	1.27676e-10	6.54191e-09	Cd248
ENSMUSG00000086205	23.216	2.40563	0.521684	1.94346e-07	5.11993e-06	Gm12679
ENSMUSG00000022504	129.197	2.29528	0.382017	6.66761e-11	3.65084e-09	Ciita
ENSMUSG00000060586	474.015	2.21052	0.281582	1.88288e-16	2.33686e-14	H2-Eb1
ENSMUSG00000041115	321.718	2.16766	0.172323	1.08847e-37	5.36393e-35	Iqsec2
ENSMUSG00000025856	14.6248	2.1348	0.638997	3.79904e-05	0.000503583	Pdgfa
ENSMUSG00000022768	81.3244	2.12132	0.35114	7.83976e-11	4.22364e-09	Ccdc116
ENSMUSG00000075602	3149.69	2.10089	0.151891	2.11901e-45	1.268e-42	Ly6a
ENSMUSG00000075269	635.512	2.06534	0.195873	3.02606e-27	9.75031e-25	Bex6
ENSMUSG00000006800	717.629	1.99234	0.205642	2.01791e-23	5.54263e-21	Sulf2
ENSMUSG00000018168	384.723	1.98247	0.492264	1.61199e-06	3.30992e-05	Ikzf3
ENSMUSG00000025491	368.89	1.97291	0.261734	2.66002e-15	2.91299e-13	Ifitm1
ENSMUSG00000006369	129.442	1.95803	0.380723	1.1654e-08	4.13693e-07	Fbln1
ENSMUSG00000025262	249.014	1.95134	0.298295	2.98279e-12	2.07372e-10	Fam120c
ENSMUSG00000025810	150.215	1.94503	0.457935	8.90531e-07	1.94789e-05	Nrp1
ENSMUSG00000030064	279.289	1.935	0.381745	1.8572e-08	6.28633e-07	Frmd4b
ENSMUSG00000076749	363.76	1.92617	0.496481	3.79891e-06	6.94878e-05	Tcrg-C1
ENSMUSG00000039345	1036.18	1.91107	0.115883	2.57025e-62	2.53321e-59	Mettl22
ENSMUSG00000026405	51.3709	1.86803	0.423584	3.25036e-07	8.04428e-06	C4bp
ENSMUSG00000073433	80.6433	1.82166	0.339255	4.38044e-09	1.6795e-07	Arhgdig
ENSMUSG00000087452	34.1127	1.80495	0.427441	1.17909e-06	2.49755e-05	Gm11998
ENSMUSG00000028464	147.87	1.79721	0.225073	7.88376e-17	1.05674e-14	Tpm2
ENSMUSG00000029096	1131	1.77713	0.217559	6.90846e-18	1.05228e-15	Htra3
ENSMUSG00000028541	49.7051	1.7439	0.427613	2.04356e-06	4.06516e-05	B4galt2
ENSMUSG00000062309	34.4369	1.74257	0.388864	3.68995e-07	8.93426e-06	Rpp25
ENSMUSG00000032936	839.156	1.73342	0.140447	3.27608e-36	1.56831e-33	Camkv
ENSMUSG00000048852	143.763	1.70381	0.607931	0.000143239	0.0015424	Gm12185
ENSMUSG00000089889	151.73	1.68941	0.197754	7.57493e-19	1.26918e-16	0610040B10Rik
ENSMUSG00000113536	30.5941	1.68376	0.594252	0.000156992	0.00166692	Gm49327
ENSMUSG00000027805	262.236	1.66428	0.263491	9.70372e-12	6.22935e-10	Pfn2
ENSMUSG00000100455	801.928	1.65614	0.151089	3.31147e-29	1.15591e-26	Gm29170
ENSMUSG00000036111	127.102	1.64374	0.202132	2.59954e-17	3.72268e-15	Lmo1
ENSMUSG00000026815	772.647	1.63238	0.17019	4.00982e-23	1.06642e-20	Gfi1b
ENSMUSG00000024143	709.706	1.60624	0.260139	3.27103e-11	1.8964e-09	Rhoq
ENSMUSG00000029602	754.022	1.57936	0.176181	1.87955e-20	3.53841e-18	Rasal1
ENSMUSG00000021680	627.861	1.57854	0.16702	1.72573e-22	4.25214e-20	Crhbp
ENSMUSG00000039481	39.7296	1.55364	0.465204	3.86832e-05	0.000511553	Nrtn
ENSMUSG00000097039	111.218	1.54982	0.317256	4.70332e-08	1.41734e-06	Pvt1
ENSMUSG00000049551	520.719	1.54583	0.170595	7.97628e-21	1.59098e-18	Fzd9
ENSMUSG00000038486	166.574	1.53385	0.382891	2.60285e-06	5.02428e-05	Sv2a
ENSMUSG00000035983	48.4799	1.5261	0.343371	4.60812e-07	1.09052e-05	Gm7008
ENSMUSG00000041481	148.405	1.51818	0.402623	7.56204e-06	0.000126072	Serpina3g
ENSMUSG00000073557	269.049	1.49502	0.260139	5.23642e-10	2.43712e-08	Ppp1r12b
ENSMUSG00000002083	87.5769	1.4901	0.33205	3.87605e-07	9.33092e-06	Bbc3
ENSMUSG00000070436	105.603	1.48631	0.390104	6.85768e-06	0.000115827	Serpinh1
ENSMUSG00000029153	133.203	1.46223	0.280944	1.04213e-08	3.723e-07	Ociad2
ENSMUSG00000004105	1145.78	1.45352	0.159828	5.69971e-21	1.179e-18	Angptl2
ENSMUSG00000018509	247.194	1.43212	0.205419	1.95319e-13	1.63629e-11	Cenpv
ENSMUSG00000107838	66.9885	1.42871	0.51317	0.000200135	0.00203475	Gm45769
ENSMUSG00000038295	100.977	1.415	0.36842	5.94689e-06	0.000102405	Atg9b
ENSMUSG00000020027	4694.33	1.40496	0.127412	1.22149e-29	4.44914e-27	Socs2
ENSMUSG00000022844	302.562	1.39638	0.233542	1.28865e-10	6.58272e-09	Pdia5
ENSMUSG00000024736	112.587	1.39541	0.409588	2.84873e-05	0.000396991	Tmem132a
ENSMUSG00000024403	154.653	1.39146	0.259026	4.37022e-09	1.67943e-07	Atp6v1g2
ENSMUSG00000020191	59.0186	1.38825	0.528024	0.000359485	0.00332404	Spata48
ENSMUSG00000014932	120.745	1.38039	0.39564	2.30729e-05	0.000330133	Yes1
ENSMUSG00000024426	527.941	1.36298	0.151019	1.14755e-20	2.21002e-18	Atat1
ENSMUSG00000085379	116.5	1.36155	0.204288	1.64378e-12	1.18204e-10	2310058D17Rik
ENSMUSG00000037071	390.639	1.35337	0.218173	3.39944e-11	1.95731e-09	Scd1
ENSMUSG00000037548	402.926	1.34862	0.223517	1.00713e-10	5.30646e-09	H2-DMb2
ENSMUSG00000037907	213.882	1.34774	0.264303	1.75364e-08	6.00863e-07	Ankrd13b
ENSMUSG00000038264	97.7896	1.33778	0.529712	0.00041318	0.00373803	Sema7a
ENSMUSG00000019590	75.9024	1.33238	0.540865	0.000547866	0.0047317	Cyb561
ENSMUSG00000050022	82.6445	1.31602	0.470475	0.000228144	0.00227127	Amz1
ENSMUSG00000089762	129.224	1.28372	0.239418	5.30798e-09	1.9896e-07	Ier5l
ENSMUSG00000086350	173.493	1.27569	0.218458	3.3269e-10	1.5881e-08	B230369F24Rik
ENSMUSG00000067586	181.283	1.27389	0.280066	3.16685e-07	7.86082e-06	S1pr3
ENSMUSG00000082365	22.1396	1.26961	0.56949	0.000980951	0.00757411	Gm15754
ENSMUSG00000070643	186.404	1.26907	0.187976	8.91761e-13	6.73038e-11	Sox13
ENSMUSG00000061086	2255.05	1.25736	0.182848	5.1522e-13	3.99653e-11	Myl4
ENSMUSG00000039963	184.817	1.23815	0.284065	6.94063e-07	1.55676e-05	Ccdc40
ENSMUSG00000083161	915.075	1.22995	0.154702	1.27315e-16	1.62836e-14	Gm11427
ENSMUSG00000028927	758.558	1.2135	0.178971	8.35779e-13	6.33642e-11	Padi2
ENSMUSG00000044345	104.769	1.20887	0.280432	1.0219e-06	2.20076e-05	Marveld1
ENSMUSG00000109771	189.356	1.1977	0.357711	3.48068e-05	0.000468049	Gm35315
ENSMUSG00000111713	66.561	1.18481	0.259947	2.79264e-07	7.02564e-06	Gm20234
ENSMUSG00000076613	33778.8	1.17481	0.137741	1.06271e-18	1.76295e-16	Ighg2b
ENSMUSG00000030498	823.687	1.17295	0.163836	5.71817e-14	5.09617e-12	Gas2
ENSMUSG00000032556	8293.62	1.17017	0.0868155	1.59566e-42	8.91175e-40	Bfsp2
ENSMUSG00000031951	119.41	1.16934	0.350774	4.73129e-05	0.00060792	Tmem231
ENSMUSG00000023972	156.98	1.16452	0.413424	0.000174231	0.00181319	Ptk7
ENSMUSG00000021265	201.316	1.14786	0.210344	3.36234e-09	1.31934e-07	Slc25a29
ENSMUSG00000030156	2037.16	1.14564	0.0997051	1.15714e-31	4.72873e-29	Cd69
ENSMUSG00000044320	58.4605	1.14335	0.429283	0.00038079	0.00349214	1700001O22Rik
ENSMUSG00000046058	225.231	1.12232	0.180386	3.57676e-11	2.04535e-09	Eid2
ENSMUSG00000033182	35.4652	1.1187	0.718424	0.00373716	0.0224109	Kbtbd12
ENSMUSG00000037216	131.671	1.11822	0.231214	7.67468e-08	2.20565e-06	Lipt1
ENSMUSG00000022519	1183.94	1.11338	0.170296	4.48758e-12	3.0441e-10	Srl
ENSMUSG00000044678	98.2316	1.1091	0.402455	0.000316068	0.00298856	Ly6k
ENSMUSG00000035504	70.3146	1.1007	0.428027	0.000499707	0.00438261	Reep6
ENSMUSG00000033287	421.254	1.0952	0.131139	5.32981e-18	8.2686e-16	Kctd17
ENSMUSG00000020182	405.81	1.08902	0.182606	1.85879e-10	9.29674e-09	Ddc
ENSMUSG00000054517	800.416	1.08598	0.175934	5.10618e-11	2.84233e-09	Trim65
ENSMUSG00000025140	609.41	1.07383	0.202613	8.49764e-09	3.10869e-07	Pycr1
ENSMUSG00000098715	75.9446	1.07026	0.255463	1.70508e-06	3.48823e-05	Gm28053
ENSMUSG00000027489	43.8789	1.06957	0.484478	0.00118422	0.00883025	Necab3
ENSMUSG00000046329	330.502	1.06953	0.192691	2.12556e-09	8.70753e-08	Slc25a23
ENSMUSG00000041298	622.584	1.06941	0.156082	5.44659e-13	4.18613e-11	Katnal1
ENSMUSG00000024538	578.008	1.06317	0.144342	1.33831e-14	1.32683e-12	Ppic
ENSMUSG00000034634	11137.3	1.05282	0.114444	3.02806e-21	6.34189e-19	Ly6d
ENSMUSG00000040957	117.587	1.04994	0.434349	0.000615614	0.0052166	Cables1
ENSMUSG00000042684	492.39	1.03904	0.200911	1.68667e-08	5.82682e-07	Npl
ENSMUSG00000100680	86.6343	1.03871	0.251591	2.53125e-06	4.9029e-05	1810044D09Rik
ENSMUSG00000031880	69.7261	1.03772	0.296822	3.09709e-05	0.000424646	Rrad
ENSMUSG00000052271	252.415	1.03638	0.44574	0.00100245	0.00770813	Bhlha15
ENSMUSG00000022415	43.823	1.03487	0.363718	0.000256682	0.00251273	Syngr1
ENSMUSG00000026458	100.256	1.02551	0.40609	0.000613904	0.00520808	Ppfia4
ENSMUSG00000028207	870.734	1.01905	0.178608	8.65935e-10	3.80807e-08	Asph
ENSMUSG00000056665	854.012	1.01676	0.177332	7.543e-10	3.37021e-08	Them6
ENSMUSG00000066363	434.009	1.01562	0.388714	0.000364472	0.00336458	Serpina3f
ENSMUSG00000041801	605.993	1.0111	0.179377	1.16794e-09	5.06965e-08	Phlda3
ENSMUSG00000054675	2956.66	1.00483	0.140839	7.74626e-14	6.79521e-12	Tmem119
ENSMUSG00000056091	495.061	1.00408	0.188381	7.57126e-09	2.80036e-07	St3gal5
ENSMUSG00000044694	352.625	1.00091	0.136005	1.45187e-14	1.41431e-12	2010007H06Rik
ENSMUSG00000029207	169.667	0.998805	0.236934	1.80227e-06	3.66914e-05	Apbb2
ENSMUSG00000038569	100.402	0.997654	0.320227	0.00010411	0.00118826	Rad9b
ENSMUSG00000035637	1701.72	0.993939	0.132401	4.73643e-15	4.99112e-13	Grhpr
ENSMUSG00000054434	50.1257	0.993094	0.445225	0.00118779	0.00885298	Tmem120b
ENSMUSG00000046157	4363.03	0.992187	0.142378	3.11763e-13	2.53572e-11	Tmem229b
ENSMUSG00000040631	82.2418	0.985531	0.317616	0.000124712	0.00137651	Dok4
ENSMUSG00000056413	977.243	0.985099	0.215716	4.1042e-07	9.80969e-06	Adap1
ENSMUSG00000026811	591.887	0.982092	0.120093	2.47982e-17	3.58184e-15	St6galnac6
ENSMUSG00000048232	178.528	0.980603	0.265626	1.56448e-05	0.000236579	Fbxo10
ENSMUSG00000006179	191.539	0.980102	0.301759	7.6506e-05	0.000924861	Prss16
ENSMUSG00000085735	29.3972	0.97582	0.439796	0.00139051	0.0100945	Mettl5os
ENSMUSG00000028082	299.455	0.973407	0.286657	4.27899e-05	0.000556635	Sh3d19
ENSMUSG00000000184	8472.02	0.968332	0.0999139	3.10871e-23	8.40103e-21	Ccnd2
ENSMUSG00000022686	1853.89	0.965025	0.16466	3.85086e-10	1.82263e-08	B3gnt5
ENSMUSG00000023982	61.655	0.964676	0.364751	0.000479899	0.0042476	Guca1a
ENSMUSG00000102353	128.614	0.958384	0.243031	5.93751e-06	0.000102349	Gm38345
ENSMUSG00000071230	15.5332	0.957996	1.31795	0.00813046	0.0413809	Npw
ENSMUSG00000022562	126.759	0.956894	0.322522	0.000180272	0.00186333	Oplah
ENSMUSG00000008496	197.494	0.953383	0.193414	6.38211e-08	1.87272e-06	Pou2f2
ENSMUSG00000032540	143.5	0.952455	0.265108	2.34869e-05	0.000335055	Abhd5
ENSMUSG00000044949	169.884	0.95231	0.208267	3.75638e-07	9.0689e-06	Ubtd2
ENSMUSG00000022594	834.998	0.949791	0.155804	8.77484e-11	4.71226e-09	Lynx1
ENSMUSG00000022094	580.104	0.944661	0.222407	1.68916e-06	3.46412e-05	Slc39a14
ENSMUSG00000038387	109.937	0.938757	0.223344	1.97764e-06	3.96522e-05	Rras
ENSMUSG00000029016	660.257	0.923127	0.194042	1.64839e-07	4.3979e-06	Clcn6
ENSMUSG00000042210	1539.31	0.921655	0.153097	1.46219e-10	7.37919e-09	Abhd14a
ENSMUSG00000028121	587.59	0.920265	0.183931	4.1903e-08	1.27652e-06	Bcar3
ENSMUSG00000026525	266.313	0.920211	0.16578	2.42474e-09	9.81317e-08	Opn3
ENSMUSG00000043664	70.0226	0.91708	0.364025	0.000732155	0.00600747	Tmem221
ENSMUSG00000056952	327.712	0.915373	0.245201	1.27109e-05	0.000197196	Tatdn2
ENSMUSG00000054967	159.286	0.914781	0.203272	5.50667e-07	1.26911e-05	Zfp647
ENSMUSG00000089718	589.295	0.89939	0.140971	1.59347e-11	9.85187e-10	2310075C17Rik
ENSMUSG00000003355	229.477	0.895376	0.219411	3.58804e-06	6.62513e-05	Fkbp11
ENSMUSG00000045659	150.279	0.894694	0.410827	0.00159899	0.011252	Plekha7
ENSMUSG00000024669	103.792	0.894516	0.345586	0.000569936	0.00489707	Cd5
ENSMUSG00000002289	175.076	0.893722	0.219875	3.82669e-06	6.97603e-05	Angptl4
ENSMUSG00000049643	2182.06	0.89133	0.112671	2.42332e-16	2.94223e-14	2310022A10Rik
ENSMUSG00000039715	1671.72	0.890694	0.118216	4.58474e-15	4.89283e-13	Wdr34
ENSMUSG00000062661	726.842	0.883666	0.196564	5.67688e-07	1.29763e-05	Ncs1
ENSMUSG00000085763	15.2593	0.874549	0.650748	0.00671327	0.0358676	Smc2os
ENSMUSG00000026928	123.424	0.870126	0.273904	0.000112431	0.00126533	Card9
ENSMUSG00000034361	1864.4	0.86857	0.12943	1.73705e-12	1.24377e-10	Cpne2
ENSMUSG00000021275	247.377	0.867862	0.409786	0.00197983	0.0133974	Tecpr2
ENSMUSG00000026249	89.0791	0.867806	0.561973	0.00475663	0.0272097	Serpine2
ENSMUSG00000021288	3708.09	0.865601	0.0758642	4.70726e-31	1.87786e-28	Klc1
ENSMUSG00000100235	42.2133	0.862109	0.362603	0.00109444	0.00826115	Gm28557
ENSMUSG00000027533	2476.56	0.860719	0.1312	5.07448e-12	3.38737e-10	Fabp5
ENSMUSG00000005474	4595.47	0.860279	0.135219	1.82511e-11	1.11199e-09	Myl10
ENSMUSG00000040734	61.4133	0.859135	0.348797	0.000847503	0.0067362	Ppp1r13l
ENSMUSG00000036278	615.537	0.857968	0.121372	1.56569e-13	1.33163e-11	Macrod1
ENSMUSG00000022914	770.678	0.856668	0.152394	1.70959e-09	7.08976e-08	Brwd1
ENSMUSG00000031700	292.921	0.853369	0.218122	6.87353e-06	0.000115861	Gpt2
ENSMUSG00000068129	716.309	0.852865	0.204458	2.64471e-06	5.09334e-05	Cst7
ENSMUSG00000049313	394.893	0.852311	0.243591	3.83879e-05	0.00050845	Sorl1
ENSMUSG00000032589	548.301	0.85118	0.171846	6.74755e-08	1.96276e-06	Bsn
ENSMUSG00000024402	227.918	0.850941	0.244744	4.12943e-05	0.000540959	Lta
ENSMUSG00000027312	492.781	0.843643	0.280833	0.000204393	0.00207109	Atrn
ENSMUSG00000029752	640.493	0.84257	0.198032	1.86093e-06	3.76115e-05	Asns
ENSMUSG00000041408	1330.16	0.840754	0.248794	5.77626e-05	0.000721172	Wapl
ENSMUSG00000078517	4340.52	0.836036	0.133995	4.36793e-11	2.44765e-09	Emc1
ENSMUSG00000022793	925.209	0.834152	0.201877	3.09113e-06	5.78811e-05	B4galt4
ENSMUSG00000063317	312.29	0.832272	0.27977	0.00022411	0.00224097	Usp31
ENSMUSG00000028063	253.358	0.831178	0.337847	0.00092236	0.00719777	Lmna
ENSMUSG00000004032	143.887	0.828874	0.178668	3.26071e-07	8.05798e-06	Gstm5
ENSMUSG00000061894	278.599	0.828282	0.196552	2.27384e-06	4.45593e-05	Zscan20
ENSMUSG00000076441	2776.44	0.827449	0.0918065	1.99074e-20	3.70609e-18	Ass1
ENSMUSG00000027559	484.909	0.822349	0.113119	3.81774e-14	3.47643e-12	Car3
ENSMUSG00000030577	1099.21	0.820277	0.225032	2.27877e-05	0.000326332	Cd22
ENSMUSG00000017466	74.247	0.818104	0.594556	0.00651793	0.035025	Timp2
ENSMUSG00000027324	569.36	0.817565	0.192639	2.04774e-06	4.06516e-05	Rpusd2
ENSMUSG00000035370	55.7363	0.817367	0.380756	0.00202122	0.0136007	Gm49322
ENSMUSG00000068417	981.207	0.817068	0.143998	1.41722e-09	6.01154e-08	Pnp2
ENSMUSG00000047221	944.524	0.813739	0.162899	5.82809e-08	1.71918e-06	Fam185a
ENSMUSG00000020712	439.764	0.811557	0.195533	3.07693e-06	5.77312e-05	Tcam1
ENSMUSG00000002504	119.99	0.804644	0.303007	0.000562134	0.00483747	Slc9a3r2
ENSMUSG00000105296	34.4786	0.804376	0.753473	0.00859235	0.043038	Gm19708
ENSMUSG00000046687	694.735	0.802575	0.12666	2.42329e-11	1.44492e-09	Gm5424
ENSMUSG00000020648	676.149	0.799812	0.159338	5.07537e-08	1.52125e-06	Dus4l
ENSMUSG00000020893	105.077	0.798668	0.297602	0.000529561	0.00460207	Per1
ENSMUSG00000025732	508.94	0.797696	0.171422	3.12311e-07	7.76376e-06	Mcrip2
ENSMUSG00000054008	504.39	0.792606	0.292607	0.000530343	0.00460648	Ndst1
ENSMUSG00000020741	4368.21	0.792324	0.180374	1.09207e-06	2.32498e-05	Cluh
ENSMUSG00000040430	809.548	0.791266	0.168917	2.77418e-07	6.98969e-06	Pitpnc1
ENSMUSG00000091337	1557.91	0.788305	0.170689	3.84664e-07	9.27344e-06	Eid1
ENSMUSG00000025511	990.334	0.787923	0.132178	2.70621e-10	1.32369e-08	Tspan4
ENSMUSG00000031078	108.847	0.78619	0.313601	0.000888712	0.00699406	Cttn
ENSMUSG00000042363	367.792	0.783723	0.158413	7.64203e-08	2.20382e-06	Lgalsl
ENSMUSG00000023966	3217.1	0.783434	0.0846282	2.39367e-21	5.14178e-19	Rsph9
ENSMUSG00000020654	409.86	0.780299	0.163291	1.7688e-07	4.71166e-06	Adcy3
ENSMUSG00000045532	73.8223	0.777729	0.388882	0.00296958	0.0185378	C1ql1
ENSMUSG00000021451	5001.01	0.771136	0.119463	1.0642e-11	6.75402e-10	Sema4d
ENSMUSG00000032578	506.416	0.768871	0.192915	6.52866e-06	0.000110941	Cish
ENSMUSG00000043439	229.326	0.768858	0.164955	3.09523e-07	7.71735e-06	Epop
ENSMUSG00000022607	776.067	0.768699	0.149252	2.50526e-08	8.13481e-07	Ptk2
ENSMUSG00000016756	622.034	0.768334	0.216208	3.50148e-05	0.000470468	Cmah
ENSMUSG00000005057	243.098	0.764912	0.249454	0.000194549	0.00198881	Sh2b2
ENSMUSG00000044734	7897.26	0.763096	0.11586	5.06543e-12	3.38737e-10	Serpinb1a
ENSMUSG00000053297	154.224	0.761992	0.311398	0.00109097	0.00824876	AI854703
ENSMUSG00000097729	122.71	0.761358	0.423807	0.00427525	0.0249588	2310015A10Rik
ENSMUSG00000027199	783.736	0.75996	0.17809	2.04035e-06	4.06516e-05	Gatm
ENSMUSG00000011254	441.417	0.758948	0.130391	6.54565e-10	2.98023e-08	Thg1l
ENSMUSG00000039982	620.271	0.758692	0.26124	0.000320582	0.00301931	Dtx4
ENSMUSG00000032513	717.52	0.758665	0.21782	4.62166e-05	0.000596119	Gorasp1
ENSMUSG00000042215	1630.62	0.754296	0.0947829	2.40202e-16	2.93765e-14	Bag2
ENSMUSG00000002944	1084.57	0.75258	0.184895	4.52954e-06	8.13425e-05	Cd36
ENSMUSG00000032122	1650.14	0.751587	0.0974178	1.37054e-15	1.59468e-13	Slc37a2
ENSMUSG00000031097	133.755	0.749357	0.27336	0.000509847	0.00445153	Tnni2
ENSMUSG00000040913	58.8522	0.745866	0.297018	0.000950022	0.0073761	Fbxw4
ENSMUSG00000053175	86.5549	0.744908	0.305793	0.0011998	0.00892259	Bcl3
ENSMUSG00000040751	117.724	0.74088	0.223922	9.00588e-05	0.00105742	Lat2
ENSMUSG00000046794	294.981	0.740672	0.282592	0.000745825	0.00609279	Ppp1r3b
ENSMUSG00000113626	800.559	0.740511	0.399564	0.00401075	0.0237289	Gm7240
ENSMUSG00000025209	1270.08	0.740089	0.144411	3.34295e-08	1.05426e-06	Twnk
ENSMUSG00000025702	89.788	0.738814	0.454781	0.00608133	0.033179	March8
ENSMUSG00000034266	277.419	0.737796	0.194477	1.49962e-05	0.000228419	Batf
ENSMUSG00000061411	209.023	0.733865	0.30629	0.00135779	0.00992571	Nol4l
ENSMUSG00000021779	1135.84	0.732086	0.203346	3.23466e-05	0.000440623	Thrb
ENSMUSG00000046223	60.0535	0.731564	0.494813	0.00706271	0.0372242	Plaur
ENSMUSG00000049858	531.13	0.730247	0.173808	2.80089e-06	5.34499e-05	Suox
ENSMUSG00000011148	4631.63	0.727666	0.0974373	1.10631e-14	1.10335e-12	Adssl1
ENSMUSG00000036606	2210.69	0.727659	0.157356	4.08212e-07	9.77084e-06	Plxnb2
ENSMUSG00000042097	590.65	0.7264	0.184111	8.30922e-06	0.000136894	Zfp239
ENSMUSG00000033871	274.874	0.72522	0.273005	0.000693439	0.00576604	Ppargc1b
ENSMUSG00000020882	1149.09	0.717782	0.150074	1.95839e-07	5.14308e-06	Cacnb1
ENSMUSG00000032719	59.8724	0.717569	0.306226	0.00157158	0.0111293	Sbspon
ENSMUSG00000037260	899.801	0.717335	0.14774	1.36681e-07	3.69368e-06	Hgsnat
ENSMUSG00000045106	65.8227	0.716319	0.396201	0.00460119	0.026447	Ccdc73
ENSMUSG00000035095	375.068	0.715014	0.198513	3.36007e-05	0.000454016	Fam167a
ENSMUSG00000056209	1345.89	0.712294	0.122055	6.18724e-10	2.82472e-08	Npm3
ENSMUSG00000030725	637.965	0.711993	0.177763	6.76409e-06	0.000114593	Lipt2
ENSMUSG00000004612	1475.48	0.711474	0.187473	1.50175e-05	0.000228536	Nkg7
ENSMUSG00000001240	48.0975	0.710538	0.507333	0.00809604	0.0412935	Ramp2
ENSMUSG00000032648	766.131	0.709508	0.144637	1.0569e-07	2.92701e-06	Pygm
ENSMUSG00000015337	189.303	0.708421	0.242399	0.000342514	0.00318823	Endog
ENSMUSG00000071711	197.686	0.706638	0.260316	0.000603186	0.00513855	Mpst
ENSMUSG00000000384	1811.76	0.702725	0.145507	1.32554e-07	3.61097e-06	Tbrg4
ENSMUSG00000024664	1208.95	0.701825	0.152126	3.6117e-07	8.78288e-06	Fads3
ENSMUSG00000111394	163.994	0.700153	0.347062	0.00337738	0.0206225	AC160637.1
ENSMUSG00000061273	1769.33	0.699225	0.222886	0.000184497	0.00189997	Mmgt1
ENSMUSG00000039787	557.957	0.698728	0.153062	5.88363e-07	1.33759e-05	Cercam
ENSMUSG00000028893	161.904	0.698297	0.212588	0.000108495	0.00123333	Sesn2
ENSMUSG00000032184	170.934	0.695502	0.273968	0.00103929	0.00794057	Lysmd2
ENSMUSG00000046598	1581.89	0.693859	0.146979	2.80402e-07	7.04368e-06	Bdh1
ENSMUSG00000052676	677.717	0.691799	0.155461	1.03858e-06	2.23094e-05	Zmat1
ENSMUSG00000026189	525.303	0.690479	0.163341	2.67742e-06	5.14346e-05	Pecr
ENSMUSG00000032584	383.433	0.689579	0.234522	0.000339297	0.00316885	Mst1r
ENSMUSG00000020396	644.537	0.688297	0.198723	5.83018e-05	0.000727361	Nefh
ENSMUSG00000025579	2318.04	0.687901	0.0929145	1.88533e-14	1.79481e-12	Gaa
ENSMUSG00000026594	1879.14	0.686482	0.115242	3.23072e-10	1.55548e-08	Ralgps2
ENSMUSG00000020297	244.995	0.685611	0.207839	0.000106778	0.00121622	Nsg2
ENSMUSG00000097616	105.021	0.683044	0.25752	0.000775575	0.00627161	1110019D14Rik
ENSMUSG00000040596	381.808	0.681099	0.260487	0.000857671	0.00680531	Pogk
ENSMUSG00000033909	875.354	0.680623	0.192998	4.72197e-05	0.000607775	Usp36
ENSMUSG00000050271	234.888	0.678809	0.351268	0.00413825	0.0243115	Prag1
ENSMUSG00000041707	42.3285	0.678648	0.451324	0.00829849	0.0420064	1810011H11Rik
ENSMUSG00000097287	185.23	0.677631	0.207743	0.000113136	0.00127136	D130017N08Rik
ENSMUSG00000026196	636.976	0.674237	0.159028	2.71009e-06	5.19538e-05	Bard1
ENSMUSG00000041774	676.455	0.673096	0.171749	1.07655e-05	0.00017081	Ydjc
ENSMUSG00000020528	2636.11	0.671003	0.0855168	5.58398e-16	6.68283e-14	Prpsap2
ENSMUSG00000040010	8004.17	0.668755	0.11722	1.5081e-09	6.33288e-08	Slc7a5
ENSMUSG00000087574	217.07	0.668724	0.206892	0.000138272	0.00150438	C030037D09Rik
ENSMUSG00000047735	1757.48	0.668675	0.134027	7.86017e-08	2.25123e-06	Samd9l
ENSMUSG00000003731	902.293	0.665353	0.168443	9.32026e-06	0.00015088	Kpna6
ENSMUSG00000038742	167.933	0.665221	0.1927	6.536e-05	0.000802864	Angptl6
ENSMUSG00000024008	291.6	0.661781	0.21999	0.000288255	0.00277092	Cpne5
ENSMUSG00000021951	366.211	0.661752	0.144484	6.03696e-07	1.36688e-05	Eef1akmt1
ENSMUSG00000001270	49.1687	0.661678	0.436461	0.00838135	0.0423473	Ckb
ENSMUSG00000004748	623.12	0.661661	0.150118	1.29947e-06	2.73869e-05	Mtfp1
ENSMUSG00000020142	190.595	0.660962	0.482638	0.00918316	0.0453651	Slc1a4
ENSMUSG00000001525	67884.2	0.660523	0.0784576	5.41839e-18	8.32891e-16	Tubb5
ENSMUSG00000005506	7126.1	0.660119	0.101127	8.6339e-12	5.58537e-10	Celf1
ENSMUSG00000027359	184.879	0.657587	0.31242	0.00317004	0.0195848	Slc27a2
ENSMUSG00000029059	98.842	0.653849	0.316607	0.00349795	0.0212118	Fam213b
ENSMUSG00000028064	654.978	0.65268	0.19998	0.000125587	0.00138435	Sema4a
ENSMUSG00000027395	4356.09	0.651491	0.131924	1.07048e-07	2.95972e-06	Polr1b
ENSMUSG00000002393	45.9419	0.651255	0.319086	0.00364598	0.0219427	Nr2f6
ENSMUSG00000026414	256.481	0.650206	0.279599	0.00183615	0.012624	Tnnt2
ENSMUSG00000024220	975.542	0.64867	0.13649	2.76646e-07	6.98073e-06	Zfp523
ENSMUSG00000010048	3144.58	0.648498	0.12511	2.90407e-08	9.30357e-07	Ifrd2
ENSMUSG00000025492	2817.95	0.64773	0.123493	2.03311e-08	6.77232e-07	Ifitm3
ENSMUSG00000045316	235.981	0.645573	0.195484	0.000108721	0.00123333	Fahd1
ENSMUSG00000028337	4958.11	0.644887	0.0984765	8.23682e-12	5.34915e-10	Coro2a
ENSMUSG00000021493	800.016	0.644366	0.116247	3.85362e-09	1.50157e-07	Pdlim7
ENSMUSG00000047250	116.874	0.642484	0.300541	0.00304584	0.0189292	Ptgs1
ENSMUSG00000021938	4193.97	0.642232	0.0925349	5.37375e-13	4.14918e-11	Pspc1
ENSMUSG00000021185	1282.48	0.642035	0.135153	3.05306e-07	7.62354e-06	Dglucy
ENSMUSG00000106019	197.843	0.640746	0.182452	5.56783e-05	0.000697749	Gm43672
ENSMUSG00000019732	116.32	0.639981	0.365516	0.00590621	0.0323923	Calr3
ENSMUSG00000000628	336.918	0.639948	0.247936	0.00104937	0.00799556	Hk2
ENSMUSG00000030970	402.901	0.638315	0.177143	3.99514e-05	0.000525008	Ctbp2
ENSMUSG00000058392	3849.61	0.637984	0.111235	1.61715e-09	6.75692e-08	Rrp1b
ENSMUSG00000035311	2734.9	0.6361	0.206452	0.000250691	0.00246065	Gnptab
ENSMUSG00000043592	149.458	0.63245	0.232168	0.000704545	0.00583522	Unc5cl
ENSMUSG00000004661	247.765	0.630118	0.241654	0.000983817	0.00758925	Arid3b
ENSMUSG00000023353	1499.81	0.629831	0.108766	1.03034e-09	4.5074e-08	Agap3
ENSMUSG00000037236	18927.7	0.626172	0.106114	5.3431e-10	2.47303e-08	Matr3
ENSMUSG00000032788	1024.57	0.624771	0.123288	5.64305e-08	1.67641e-06	Pdxk
ENSMUSG00000085971	325.835	0.624647	0.18553	9.68416e-05	0.00112319	Gm15411
ENSMUSG00000041961	187.606	0.624223	0.276894	0.00247801	0.0161364	Znrf3
ENSMUSG00000038121	1727.15	0.623405	0.121997	5.25049e-08	1.56534e-06	Fam210a
ENSMUSG00000000552	364.876	0.621143	0.101266	1.31645e-10	6.66377e-09	Zfp385a
ENSMUSG00000084347	117.463	0.62103	0.182058	8.41478e-05	0.00100064	Akt2-ps
ENSMUSG00000031562	1173.68	0.618462	0.133125	5.08524e-07	1.18338e-05	Dctd
ENSMUSG00000090389	49.4114	0.615774	0.298672	0.00393468	0.0233779	Cdv3-ps
ENSMUSG00000045327	132.988	0.613232	0.270351	0.00236833	0.0154884	6330549D23Rik
ENSMUSG00000092203	533.633	0.610326	0.139658	1.81224e-06	3.67604e-05	1110038B12Rik
ENSMUSG00000038422	132.482	0.610161	0.245138	0.0014567	0.0104976	Hdhd3
ENSMUSG00000003344	2219.13	0.609858	0.103468	7.30982e-10	3.29237e-08	Btbd2
ENSMUSG00000001436	5119.1	0.609742	0.102098	3.99761e-10	1.8786e-08	Slc19a1
ENSMUSG00000003528	11508.4	0.607771	0.092175	6.78006e-12	4.49011e-10	Slc25a1
ENSMUSG00000022015	435.068	0.607358	0.141513	2.5971e-06	5.01897e-05	Tnfsf11
ENSMUSG00000000682	6982.34	0.606317	0.100747	2.65242e-10	1.30326e-08	Cd52
ENSMUSG00000034926	690.66	0.605615	0.114201	1.78042e-08	6.08793e-07	Dhcr24
ENSMUSG00000026944	1226.68	0.605504	0.360995	0.00811173	0.0413251	Abca2
ENSMUSG00000026921	1831.92	0.603792	0.0902792	3.31427e-12	2.29466e-10	Egfl7
ENSMUSG00000000673	897.078	0.600466	0.136867	1.5922e-06	3.27329e-05	Haao
ENSMUSG00000027185	3295.98	0.599957	0.165482	4.06494e-05	0.000533762	Nat10
ENSMUSG00000028664	305.91	0.597967	0.224125	0.000919518	0.00718588	Ephb2
ENSMUSG00000086013	272.118	0.597328	0.166928	4.48122e-05	0.000580687	Gm15706
ENSMUSG00000072964	5738.29	0.597116	0.0881496	2.22759e-12	1.5682e-10	Bhlhb9
ENSMUSG00000035397	473.735	0.596158	0.143463	4.77258e-06	8.47082e-05	Klf16
ENSMUSG00000033880	4390.71	0.591914	0.0859443	1.24984e-12	9.14458e-11	Lgals3bp
ENSMUSG00000022346	12726.5	0.59125	0.108485	6.8894e-09	2.55947e-07	Myc
ENSMUSG00000037977	152.974	0.590745	0.245781	0.00192205	0.013091	6430571L13Rik
ENSMUSG00000003134	167.422	0.590594	0.316009	0.00615622	0.0335003	Tbc1d8
ENSMUSG00000103653	990.718	0.590413	0.11562	5.17349e-08	1.54513e-06	Gstp-ps
ENSMUSG00000030604	173.278	0.589881	0.211894	0.000703483	0.0058293	Zfp626
ENSMUSG00000039096	232.604	0.589666	0.17877	0.000137069	0.00149517	Rsad1
ENSMUSG00000045045	240.358	0.587661	0.214583	0.000802066	0.00643304	Lrfn4
ENSMUSG00000036863	197.926	0.586913	0.300453	0.00533958	0.0298813	Syde2
ENSMUSG00000068407	2079.06	0.585506	0.09224	3.7285e-11	2.11051e-09	Rnase12
ENSMUSG00000045282	488.72	0.584845	0.175887	0.000127315	0.00139972	Tmem86b
ENSMUSG00000054150	905.759	0.584134	0.140575	4.88672e-06	8.62423e-05	Syne3
ENSMUSG00000034353	7337.37	0.583029	0.103562	3.12948e-09	1.24844e-07	Ramp1
ENSMUSG00000063286	2390.15	0.582352	0.210462	0.000765153	0.00621432	Gm8995
ENSMUSG00000045817	8482.13	0.581707	0.0998061	9.63569e-10	4.22633e-08	Zfp36l2
ENSMUSG00000020086	133.951	0.581438	0.239075	0.00187177	0.0128006	H2afy2
ENSMUSG00000078185	255.453	0.58101	0.314893	0.00661819	0.0354614	Chml
ENSMUSG00000002799	247.715	0.580001	0.188439	0.000290489	0.00278919	Jag2
ENSMUSG00000091264	1052.92	0.579993	0.209174	0.000758466	0.00616696	Smim13
ENSMUSG00000078870	124.49	0.579485	0.281814	0.00418599	0.0245403	Gm14410
ENSMUSG00000085156	1322.79	0.579309	0.11946	2.00523e-07	5.24963e-06	Snhg15
ENSMUSG00000113211	141.577	0.576211	0.239003	0.00191895	0.0130806	4921525O09Rik
ENSMUSG00000031982	619.896	0.575855	0.12331	4.97216e-07	1.16369e-05	Arv1
ENSMUSG00000051817	651.793	0.575759	0.136864	4.08687e-06	7.38678e-05	Sox12
ENSMUSG00000081603	668.202	0.574435	0.18354	0.000256747	0.00251273	Gm14681
ENSMUSG00000026181	3993.38	0.574044	0.144229	1.12975e-05	0.000177571	Ppm1f
ENSMUSG00000042105	929.581	0.570824	0.173979	0.000154382	0.00164025	Inpp5f
ENSMUSG00000037999	962.94	0.568216	0.179086	0.000225134	0.00224664	Arap2
ENSMUSG00000047749	606.341	0.568017	0.137072	5.53353e-06	9.63767e-05	Zc3hav1l
ENSMUSG00000023118	3064.08	0.567919	0.103405	8.08594e-09	2.97105e-07	Sympk
ENSMUSG00000015176	10028.2	0.567651	0.100062	2.38091e-09	9.68256e-08	Nolc1
ENSMUSG00000049657	1171.61	0.56714	0.135873	4.92666e-06	8.67994e-05	Zbtb5
ENSMUSG00000074575	994.859	0.565593	0.173864	0.000174578	0.00181455	Kcng1
ENSMUSG00000042354	10988.2	0.56476	0.120803	5.45667e-07	1.25932e-05	Gnl3
ENSMUSG00000105143	105.917	0.563988	0.197749	0.000614265	0.00520851	Gm8069
ENSMUSG00000073676	5858.78	0.563365	0.136923	6.37606e-06	0.000108568	Hspe1
ENSMUSG00000033174	181.922	0.562574	0.195308	0.000573283	0.00491574	Mgll
ENSMUSG00000031490	3150.66	0.562171	0.0959165	8.4504e-10	3.72596e-08	Eif4ebp1
ENSMUSG00000033706	3439.83	0.562141	0.0907784	1.05678e-10	5.49889e-09	Smyd5
ENSMUSG00000025203	5498.14	0.561995	0.157109	5.49776e-05	0.000691035	Scd2
ENSMUSG00000033307	20265.4	0.561684	0.119721	3.97889e-07	9.55844e-06	Mif
ENSMUSG00000020718	328.991	0.561602	0.145382	1.81609e-05	0.000268094	Polg2
ENSMUSG00000097769	712.906	0.560107	0.124014	1.042e-06	2.23543e-05	Snhg4
ENSMUSG00000027076	1483.21	0.559503	0.129077	2.2851e-06	4.47276e-05	Timm10
ENSMUSG00000073421	6740.95	0.558478	0.103959	1.29417e-08	4.56502e-07	H2-Ab1
ENSMUSG00000078789	695.835	0.558349	0.137312	7.95709e-06	0.000131611	Dph1
ENSMUSG00000056214	1782.97	0.557232	0.0990111	3.55166e-09	1.39037e-07	Pard6g
ENSMUSG00000078713	5258.07	0.556447	0.107197	3.80172e-08	1.17959e-06	Tomm5
ENSMUSG00000027274	221.269	0.555838	0.232648	0.00224131	0.0148256	Mkks
ENSMUSG00000002308	1362.19	0.554613	0.117982	4.42497e-07	1.05385e-05	Cd320
ENSMUSG00000067714	300.269	0.553744	0.165389	0.000129537	0.00142289	Lpar5
ENSMUSG00000037991	1890.57	0.552611	0.119616	7.4415e-07	1.65801e-05	Rmi2
ENSMUSG00000008435	322.676	0.551753	0.178332	0.000304814	0.0028985	Rdh13
ENSMUSG00000043419	925.764	0.550976	0.144336	2.25789e-05	0.000323618	Chd3os
ENSMUSG00000052912	51.4193	0.550656	0.311876	0.0085665	0.0429479	Smarca5-ps
ENSMUSG00000039275	1869.3	0.550527	0.158806	8.65769e-05	0.00102337	Foxk2
ENSMUSG00000026603	999.032	0.549177	0.173421	0.000252379	0.00247432	Smyd2
ENSMUSG00000057541	4556.29	0.547131	0.0999313	7.94585e-09	2.92599e-07	Pus7
ENSMUSG00000032698	1685.1	0.546082	0.0852003	2.48326e-11	1.47543e-09	Lmo2
ENSMUSG00000029507	1921.85	0.545872	0.131084	6.02238e-06	0.000103386	Pus1
ENSMUSG00000050192	464.938	0.54587	0.275304	0.00577696	0.0318084	Eif5a2
ENSMUSG00000057113	46438.3	0.545828	0.109153	1.00644e-07	2.7965e-06	Npm1
ENSMUSG00000050556	208.679	0.545804	0.235891	0.00284713	0.0179675	Kcnb1
ENSMUSG00000024286	2027.19	0.54447	0.0997217	8.68695e-09	3.16413e-07	Ccny
ENSMUSG00000001983	801.13	0.54434	0.153393	6.13442e-05	0.00075854	Taco1
ENSMUSG00000078695	154.909	0.543549	0.163167	0.000142209	0.00153525	Cisd3
ENSMUSG00000083836	397.005	0.54196	0.144246	2.94749e-05	0.000407468	Ldha-ps2
ENSMUSG00000072381	66.4922	0.541749	0.246642	0.0038101	0.0227831	Gm10355
ENSMUSG00000028261	2427.29	0.541722	0.127043	3.42969e-06	6.35669e-05	Ndufaf4
ENSMUSG00000068923	176.089	0.539907	0.290579	0.00746005	0.038793	Syt11
ENSMUSG00000025403	17498	0.538479	0.119046	1.05308e-06	2.2563e-05	Shmt2
ENSMUSG00000020268	460.465	0.538211	0.118111	9.33996e-07	2.03235e-05	Lyrm7
ENSMUSG00000028434	8246.37	0.537246	0.0905299	5.57911e-10	2.56808e-08	Epb41l4b
ENSMUSG00000040463	18456	0.536292	0.123026	2.87398e-06	5.44657e-05	Mybbp1a
ENSMUSG00000026618	4909.62	0.534784	0.0765521	4.67993e-13	3.6868e-11	Iars2
ENSMUSG00000042331	229.159	0.533376	0.24096	0.00374399	0.0224358	Specc1
ENSMUSG00000031765	276.234	0.532493	0.2268	0.00274907	0.0174706	Mt1
ENSMUSG00000029322	14796.9	0.531889	0.100974	2.63164e-08	8.47944e-07	Plac8
ENSMUSG00000042757	2475.12	0.529673	0.0874021	2.81055e-10	1.36892e-08	Tmem108
ENSMUSG00000020894	1524.46	0.529581	0.093809	4.40988e-09	1.68693e-07	Vamp2
ENSMUSG00000006442	12336.7	0.528799	0.122499	2.9422e-06	5.53893e-05	Srm
ENSMUSG00000034424	5033.39	0.528373	0.10733	1.49176e-07	4.00553e-06	Gcsh
ENSMUSG00000032640	1541.91	0.527489	0.16898	0.000312352	0.00296178	Chsy1
ENSMUSG00000074039	416.84	0.525383	0.124455	4.83958e-06	8.56254e-05	4930520O04Rik
ENSMUSG00000039826	1406.61	0.525316	0.0966209	1.16986e-08	4.14397e-07	Trub2
ENSMUSG00000026749	1613.63	0.525062	0.156477	0.000141582	0.00153119	Nek6
ENSMUSG00000033257	1096.19	0.524999	0.215698	0.00225558	0.0148905	Ttll4
ENSMUSG00000028982	276.777	0.524092	0.189207	0.000919131	0.00718588	Slc25a33
ENSMUSG00000026893	141.057	0.523352	0.244811	0.00451018	0.026031	Gca
ENSMUSG00000054942	817.456	0.521682	0.238051	0.00412412	0.0242625	Miga1
ENSMUSG00000025190	2311.04	0.521667	0.0989534	2.73093e-08	8.76566e-07	Got1
ENSMUSG00000083626	1110.55	0.520809	0.132761	1.61096e-05	0.000242294	Gm4459
ENSMUSG00000006641	767.297	0.52066	0.151204	0.00010395	0.00118806	Slc5a6
ENSMUSG00000044700	2069.6	0.520538	0.108192	2.87411e-07	7.19815e-06	Tmem201
ENSMUSG00000059713	399.565	0.519836	0.27054	0.00727072	0.038081	Rcan3
ENSMUSG00000059897	1247.61	0.519548	0.167096	0.00032387	0.0030384	Zfp930
ENSMUSG00000006717	935.139	0.519319	0.126155	7.19608e-06	0.000120812	Acot13
ENSMUSG00000024537	5573.64	0.519219	0.0886184	1.13513e-09	4.94002e-08	Psmg2
ENSMUSG00000006301	1004.93	0.519031	0.111743	6.48559e-07	1.46057e-05	Tmbim1
ENSMUSG00000025962	3564.55	0.519002	0.114443	1.10103e-06	2.34108e-05	Fastkd2
ENSMUSG00000027333	120.468	0.518399	0.241262	0.00457089	0.026331	Smox
ENSMUSG00000021936	611.296	0.518367	0.172618	0.000454142	0.00405389	Mapk8
ENSMUSG00000033161	6167.13	0.517262	0.142887	5.90346e-05	0.000735408	Atp1a1
ENSMUSG00000030189	16169.5	0.515321	0.0990356	3.42242e-08	1.07383e-06	Ybx3
ENSMUSG00000032115	1924.54	0.515233	0.198473	0.00155497	0.0110631	Hyou1
ENSMUSG00000018428	1679.65	0.515073	0.112958	9.90421e-07	2.13855e-05	Akap1
ENSMUSG00000018199	244.675	0.513845	0.285929	0.00936157	0.0459576	Trove2
ENSMUSG00000041220	5828.54	0.513007	0.090172	2.99898e-09	1.19923e-07	Elovl6
ENSMUSG00000006589	2446.44	0.51223	0.126374	9.98946e-06	0.000160602	Aprt
ENSMUSG00000009470	5866.38	0.512167	0.0945064	1.58303e-08	5.48011e-07	Tnpo1
ENSMUSG00000046380	645.243	0.51024	0.16999	0.000477088	0.00422719	Jrk
ENSMUSG00000041733	3296.24	0.508895	0.0958336	2.55173e-08	8.2537e-07	Coq5
ENSMUSG00000022199	180.12	0.508473	0.28243	0.00914766	0.0452789	Slc22a17
ENSMUSG00000025937	1082.48	0.508206	0.168998	0.000459238	0.00409501	Lactb2
ENSMUSG00000060950	1339.05	0.507162	0.100061	8.52141e-08	2.41584e-06	Trmt61a
ENSMUSG00000086841	797.691	0.505861	0.128628	1.64214e-05	0.000246101	2410006H16Rik
ENSMUSG00000031657	3163.23	0.505314	0.121566	6.26469e-06	0.000106998	Heatr3
ENSMUSG00000024665	2657.23	0.505076	0.0946335	2.19253e-08	7.24571e-07	Fads2
ENSMUSG00000113749	160.869	0.504425	0.168383	0.000493182	0.00433767	Mrto4-ps1
ENSMUSG00000110644	293.954	0.503773	0.125659	1.18983e-05	0.000185793	Gm7390
ENSMUSG00000043683	1448.25	0.503678	0.155174	0.000217522	0.002185	Fem1a
ENSMUSG00000096986	267.331	0.502278	0.259469	0.00753872	0.0391057	4930509E16Rik
ENSMUSG00000052563	197.292	0.500654	0.202166	0.00220172	0.0146214	D930048N14Rik
ENSMUSG00000033985	334.237	-0.500762	0.157875	0.000279846	0.00270093	Tesk2
ENSMUSG00000056267	1520.23	-0.500857	0.150948	0.000169361	0.00177242	Cep70
ENSMUSG00000019539	224.544	-0.501244	0.15866	0.000288763	0.00277421	Rcn3
ENSMUSG00000026687	4944.71	-0.501814	0.0807874	1.09816e-10	5.64529e-09	Aldh9a1
ENSMUSG00000030708	245.155	-0.502592	0.208881	0.00262335	0.0168407	Dnajb13
ENSMUSG00000034023	2582.41	-0.503024	0.135977	4.12556e-05	0.000540959	Fancd2
ENSMUSG00000086503	1000.67	-0.503298	0.235289	0.00508946	0.0287699	Xist
ENSMUSG00000041781	7602.5	-0.503302	0.0796744	7.5758e-11	4.10785e-09	Cpsf2
ENSMUSG00000028559	9597.26	-0.503893	0.0846983	5.36376e-10	2.47575e-08	Osbpl9
ENSMUSG00000066829	920.439	-0.505141	0.148106	0.000118108	0.00131314	Zfp810
ENSMUSG00000049871	2059.24	-0.505378	0.154589	0.000206719	0.00208966	Nlrc3
ENSMUSG00000014232	310.977	-0.505543	0.14074	6.15645e-05	0.000760703	Cluap1
ENSMUSG00000022139	1825.35	-0.50609	0.109585	8.55415e-07	1.88585e-05	Mbnl2
ENSMUSG00000040774	2256.76	-0.50619	0.114285	1.84596e-06	3.7354e-05	Cept1
ENSMUSG00000020707	760.829	-0.506469	0.117829	3.33807e-06	6.20748e-05	Rnf135
ENSMUSG00000000290	2499.43	-0.506995	0.0998067	7.61764e-08	2.20058e-06	Itgb2
ENSMUSG00000048310	936.291	-0.50723	0.0896475	3.13804e-09	1.24888e-07	Pskh1
ENSMUSG00000025920	1133.97	-0.507406	0.11593	2.36952e-06	4.62412e-05	Stau2
ENSMUSG00000039599	1204.31	-0.507842	0.103683	1.93362e-07	5.10203e-06	Fam149b
ENSMUSG00000026495	354.098	-0.508009	0.159626	0.000259392	0.00253122	Efcab2
ENSMUSG00000061533	1917.06	-0.50843	0.129178	1.54935e-05	0.000234502	Cep128
ENSMUSG00000024835	11240.8	-0.508674	0.076838	7.88995e-12	5.14382e-10	Coro1b
ENSMUSG00000002345	469.917	-0.508702	0.141942	6.18742e-05	0.000763967	Borcs8
ENSMUSG00000039676	559.726	-0.50878	0.172071	0.000543548	0.0047041	Capsl
ENSMUSG00000022791	96.1233	-0.50886	0.273455	0.00841216	0.0424407	Tnk2
ENSMUSG00000043008	20531.8	-0.509013	0.0975226	3.62689e-08	1.13374e-06	Klhl6
ENSMUSG00000041238	4059.72	-0.50935	0.0625303	6.9512e-17	9.54651e-15	Rbbp8
ENSMUSG00000039007	258.099	-0.50953	0.253945	0.00611361	0.0333117	Cpq
ENSMUSG00000000876	1032.54	-0.509853	0.119795	3.99356e-06	7.22593e-05	Pxmp4
ENSMUSG00000024132	1612.63	-0.510772	0.0868489	8.31629e-10	3.6765e-08	Eci1
ENSMUSG00000030287	770.758	-0.511532	0.195384	0.00144088	0.010406	Itpr2
ENSMUSG00000021485	3568.88	-0.512078	0.0984144	2.46195e-08	8.03917e-07	Mxd3
ENSMUSG00000061132	42753.4	-0.512524	0.0856806	4.48922e-10	2.09518e-08	Blnk
ENSMUSG00000048163	7858.59	-0.512712	0.0941525	9.51991e-09	3.43763e-07	Selplg
ENSMUSG00000039159	2270.57	-0.51273	0.153162	0.000148562	0.0015895	Ube2h
ENSMUSG00000044469	253.36	-0.513703	0.200734	0.00166796	0.0116396	Tnfaip8l1
ENSMUSG00000029233	846.661	-0.514378	0.11451	1.37924e-06	2.89589e-05	Srd5a3
ENSMUSG00000028803	133.605	-0.514579	0.273983	0.00793677	0.040642	Nipal3
ENSMUSG00000024197	3641.73	-0.514643	0.112871	9.64855e-07	2.09135e-05	Plin3
ENSMUSG00000037349	398.133	-0.514693	0.136014	2.80391e-05	0.000392477	Nudt22
ENSMUSG00000020186	1002.24	-0.515496	0.0913546	3.1778e-09	1.25872e-07	Csrp2
ENSMUSG00000068874	653.457	-0.516439	0.147102	8.66092e-05	0.00102337	Selenbp1
ENSMUSG00000055897	265.431	-0.516606	0.164766	0.000292666	0.00280516	Ppp4r1l-ps
ENSMUSG00000026581	18374.5	-0.517012	0.12881	1.10587e-05	0.000174471	Sell
ENSMUSG00000045751	3831.85	-0.51724	0.105785	1.8464e-07	4.87957e-06	Mms22l
ENSMUSG00000051735	451.524	-0.517632	0.149263	9.34749e-05	0.00109217	Rinl
ENSMUSG00000033318	3004.36	-0.519132	0.139782	3.50606e-05	0.000470605	Gstt2
ENSMUSG00000027985	11996.6	-0.519734	0.112169	6.46095e-07	1.45698e-05	Lef1
ENSMUSG00000040370	604.455	-0.519968	0.182287	0.000683197	0.00570352	Etfrf1
ENSMUSG00000031156	1062.14	-0.520066	0.0934055	5.17012e-09	1.94664e-07	Slc35a2
ENSMUSG00000029094	283.05	-0.520179	0.243111	0.00446943	0.0258403	Afap1
ENSMUSG00000021608	2847.31	-0.521139	0.108544	2.73863e-07	6.92092e-06	Lpcat1
ENSMUSG00000025014	90801.5	-0.521563	0.090013	1.33879e-09	5.70775e-08	Dntt
ENSMUSG00000033335	6711.46	-0.522178	0.0816236	2.76539e-11	1.62576e-09	Dnm2
ENSMUSG00000025465	2395.77	-0.522851	0.0702088	1.86813e-14	1.7886e-12	Echs1
ENSMUSG00000020439	5818.25	-0.523386	0.100323	3.29297e-08	1.04101e-06	Smtn
ENSMUSG00000022369	1874.88	-0.523578	0.114385	8.77941e-07	1.92538e-05	Mtbp
ENSMUSG00000013698	558.911	-0.524495	0.110018	3.53676e-07	8.63826e-06	Pea15a
ENSMUSG00000032041	138.738	-0.524633	0.267588	0.00641835	0.0346176	Tirap
ENSMUSG00000001248	3519.9	-0.525352	0.0997978	2.46621e-08	8.03917e-07	Gramd1a
ENSMUSG00000010362	2228.82	-0.52657	0.105831	1.20101e-07	3.29883e-06	Rdm1
ENSMUSG00000025504	227.493	-0.52832	0.322232	0.0103566	0.0496638	Eps8l2
ENSMUSG00000057948	1359.49	-0.528413	0.122485	2.88013e-06	5.44657e-05	Unc13d
ENSMUSG00000031428	490.321	-0.530655	0.177951	0.000463354	0.00412254	Zcchc18
ENSMUSG00000003623	2693.3	-0.530813	0.084265	9.27108e-11	4.90342e-09	Crot
ENSMUSG00000029735	434.036	-0.530903	0.159054	0.000143188	0.0015424	Tpk1
ENSMUSG00000047242	652.978	-0.531644	0.148504	5.914e-05	0.000736175	Taf9b
ENSMUSG00000032782	1407.22	-0.531691	0.114579	6.02013e-07	1.36491e-05	Cntrob
ENSMUSG00000033713	2589.98	-0.531869	0.115403	7.60264e-07	1.69166e-05	Foxn3
ENSMUSG00000039531	1279.47	-0.531966	0.0987509	1.31994e-08	4.64612e-07	Zufsp
ENSMUSG00000043289	1047.34	-0.532853	0.126615	4.62934e-06	8.27797e-05	Mei4
ENSMUSG00000035062	424.404	-0.534325	0.122921	2.48852e-06	4.83142e-05	Zc4h2
ENSMUSG00000050394	84.6983	-0.536357	0.285523	0.00717161	0.0376678	Armcx6
ENSMUSG00000026436	1459.31	-0.53662	0.200115	0.0010897	0.00824287	Elk4
ENSMUSG00000047881	937.186	-0.537671	0.113583	3.98197e-07	9.55844e-06	Rell1
ENSMUSG00000016382	457.672	-0.538636	0.18648	0.000601816	0.00513189	Pls3
ENSMUSG00000039230	3467.88	-0.539271	0.0913494	6.58742e-10	2.99112e-08	Tbcd
ENSMUSG00000052917	955.922	-0.540095	0.164208	0.000163231	0.001719	Senp7
ENSMUSG00000001665	255.062	-0.540869	0.197835	0.00093548	0.00728545	Gstt3
ENSMUSG00000067370	261.934	-0.54203	0.245692	0.00356935	0.0215589	B3galt4
ENSMUSG00000025235	620.486	-0.542577	0.158633	9.93185e-05	0.00114606	Bbs4
ENSMUSG00000021665	1173.78	-0.542808	0.0973061	4.33157e-09	1.67224e-07	Hexb
ENSMUSG00000026116	5617.69	-0.543898	0.12418	2.04055e-06	4.06516e-05	Tmem131
ENSMUSG00000054065	709.463	-0.544385	0.17636	0.000315065	0.00298244	Pkp3
ENSMUSG00000028551	4081.28	-0.544434	0.124562	2.06236e-06	4.08933e-05	Cdkn2c
ENSMUSG00000035762	597.984	-0.544856	0.169729	0.000199129	0.00202698	Tmem161b
ENSMUSG00000073725	1110.87	-0.54501	0.151961	5.39625e-05	0.000681123	Lmbrd1
ENSMUSG00000022602	608.237	-0.545153	0.18066	0.000393518	0.00358922	Arc
ENSMUSG00000021585	3230.48	-0.54516	0.110496	1.43658e-07	3.86975e-06	Cast
ENSMUSG00000001166	145.883	-0.545859	0.19558	0.000788094	0.00634746	Oas1c
ENSMUSG00000057098	17500.9	-0.546158	0.122591	1.05917e-06	2.26646e-05	Ebf1
ENSMUSG00000021482	688.973	-0.54646	0.148618	3.73364e-05	0.00049688	Aaed1
ENSMUSG00000020573	4058.04	-0.546648	0.143779	2.1985e-05	0.000317551	Pik3cg
ENSMUSG00000073437	479.568	-0.549104	0.269505	0.00507548	0.0287102	D330041H03Rik
ENSMUSG00000066677	1031.33	-0.549342	0.162851	0.000112449	0.00126533	Ifi208
ENSMUSG00000058587	6243.15	-0.54942	0.130919	4.47496e-06	8.04484e-05	Tmod3
ENSMUSG00000032177	224.759	-0.549724	0.306938	0.00774854	0.0398731	Pde4a
ENSMUSG00000031255	616.792	-0.549882	0.160752	9.82904e-05	0.00113733	Sytl4
ENSMUSG00000056531	1126.47	-0.550203	0.14215	1.75018e-05	0.000259966	Ccdc18
ENSMUSG00000031822	837.569	-0.550792	0.20114	0.000869681	0.00687984	Gse1
ENSMUSG00000039577	494.024	-0.551366	0.148101	3.13159e-05	0.000428325	Nphp4
ENSMUSG00000040247	18272.6	-0.551461	0.108853	6.71128e-08	1.95561e-06	Tbc1d10c
ENSMUSG00000096472	6382.01	-0.552276	0.114209	2.29311e-07	5.93835e-06	Cdkn2d
ENSMUSG00000056763	1023.88	-0.552617	0.137028	9.02108e-06	0.000147175	Cspp1
ENSMUSG00000101856	65.9228	-0.553129	0.264449	0.00448154	0.0258835	1700096K18Rik
ENSMUSG00000114277	953.249	-0.55387	0.118897	5.33124e-07	1.23207e-05	Gm48583
ENSMUSG00000038481	1983.56	-0.554065	0.20154	0.000857303	0.00680531	Cdk19
ENSMUSG00000000753	1460.23	-0.556087	0.112283	1.26698e-07	3.463e-06	Serpinf1
ENSMUSG00000027641	8560.35	-0.557842	0.142228	1.30418e-05	0.000201768	Rbl1
ENSMUSG00000029311	79.8065	-0.557981	0.28555	0.00579829	0.0319049	Hsd17b11
ENSMUSG00000029802	1095.99	-0.55922	0.103259	1.05007e-08	3.73545e-07	Abcg2
ENSMUSG00000079470	193.406	-0.559656	0.228199	0.0018684	0.0127985	Utp14b
ENSMUSG00000019087	6482.44	-0.562077	0.0768931	5.50124e-14	4.92905e-12	Atp6ap1
ENSMUSG00000024797	121.196	-0.562517	0.222418	0.00151674	0.0108325	Vps51
ENSMUSG00000031583	1744.89	-0.563468	0.192772	0.000475723	0.00421881	Wrn
ENSMUSG00000000579	145.506	-0.563505	0.178053	0.000233126	0.00231537	Dynlt1c
ENSMUSG00000097059	306.904	-0.563793	0.163084	8.30798e-05	0.000991455	Fam120aos
ENSMUSG00000000325	1452.4	-0.564668	0.164219	7.70886e-05	0.000930311	Arvcf
ENSMUSG00000055210	125.262	-0.564809	0.256007	0.00335213	0.0205005	Foxd2
ENSMUSG00000019960	5430	-0.565311	0.101859	4.72743e-09	1.7961e-07	Dusp6
ENSMUSG00000025498	679.362	-0.565525	0.181939	0.000264929	0.00257626	Irf7
ENSMUSG00000033906	510.964	-0.566384	0.167425	0.0001038	0.00118714	Zdhhc15
ENSMUSG00000032657	1326.62	-0.566423	0.117559	2.53178e-07	6.48623e-06	Fam189b
ENSMUSG00000006307	297.652	-0.568415	0.198845	0.000589526	0.00503441	Kmt2b
ENSMUSG00000015474	123.002	-0.569144	0.227459	0.00158143	0.0111731	Ppt2
ENSMUSG00000020883	729.916	-0.569829	0.168296	0.000106201	0.00121048	Fbxl20
ENSMUSG00000059142	846.876	-0.570472	0.206474	0.000778209	0.00628708	Zfp945
ENSMUSG00000017307	340.262	-0.570508	0.142773	1.00636e-05	0.0001612	Acot8
ENSMUSG00000052684	302.065	-0.570803	0.265335	0.00363508	0.0219086	Jun
ENSMUSG00000021830	2169.92	-0.570915	0.111916	5.65379e-08	1.67663e-06	Txndc16
ENSMUSG00000055862	187.593	-0.57137	0.163232	7.08693e-05	0.000864204	Izumo4
ENSMUSG00000005078	1112.62	-0.572097	0.110177	3.19302e-08	1.01324e-06	Jkamp
ENSMUSG00000001552	245.782	-0.572262	0.233411	0.00164934	0.0115337	Jup
ENSMUSG00000005533	282.759	-0.572754	0.153974	3.0593e-05	0.000419808	Igf1r
ENSMUSG00000034751	132.985	-0.573619	0.300661	0.0058883	0.0323258	Mast4
ENSMUSG00000019188	4275.62	-0.573729	0.0822242	5.14492e-13	3.99653e-11	H13
ENSMUSG00000083041	38.5813	-0.573873	0.329821	0.00805911	0.0411803	Gmfg-ps
ENSMUSG00000012123	197.421	-0.573909	0.215278	0.00102014	0.00782625	Crybg2
ENSMUSG00000003992	3610.61	-0.574066	0.0765257	1.07152e-14	1.08153e-12	Ssbp2
ENSMUSG00000037370	122.308	-0.575033	0.237752	0.00193973	0.0131793	Enpp1
ENSMUSG00000027075	2600.77	-0.575276	0.0752087	4.08007e-15	4.38215e-13	Slc43a1
ENSMUSG00000055799	104.677	-0.576458	0.324762	0.00752917	0.0390803	Tcf7l1
ENSMUSG00000029162	499.057	-0.57655	0.147548	1.42154e-05	0.000218312	Khk
ENSMUSG00000069662	5846.08	-0.576695	0.124513	5.71798e-07	1.30524e-05	Marcks
ENSMUSG00000031662	1526.82	-0.576754	0.136946	3.83047e-06	6.97603e-05	Snx20
ENSMUSG00000021203	1424.05	-0.576824	0.156813	3.47519e-05	0.000468049	Otub2
ENSMUSG00000016481	4832.57	-0.576958	0.0739796	1.31936e-15	1.54586e-13	Cr1l
ENSMUSG00000034987	501.662	-0.577838	0.183946	0.000226332	0.00225592	Hrh2
ENSMUSG00000019883	114.944	-0.578153	0.231241	0.00151232	0.0108176	Echdc1
ENSMUSG00000029385	7826.63	-0.579088	0.141025	6.08103e-06	0.000104286	Ccng2
ENSMUSG00000030447	4324.02	-0.580808	0.0895672	1.43252e-11	8.98947e-10	Cyfip1
ENSMUSG00000038005	6199.59	-0.580935	0.107482	1.00142e-08	3.59288e-07	Hpf1
ENSMUSG00000022307	6378.25	-0.581129	0.0959097	2.40349e-10	1.18792e-08	Oxr1
ENSMUSG00000026123	2655.29	-0.581297	0.0665537	3.91023e-19	6.82458e-17	Plekhb2
ENSMUSG00000037646	631.55	-0.583409	0.207902	0.000622326	0.0052662	Vps13b
ENSMUSG00000023921	2153.92	-0.583455	0.161514	3.61751e-05	0.000483344	Mut
ENSMUSG00000113035	132.561	-0.58371	0.260173	0.00289014	0.0181734	5830428M24Rik
ENSMUSG00000037849	1790.95	-0.583954	0.157011	2.96635e-05	0.000409086	Ifi206
ENSMUSG00000026223	1461.81	-0.584121	0.109158	1.49518e-08	5.19747e-07	Itm2c
ENSMUSG00000038976	291.53	-0.584791	0.23897	0.00174792	0.0120918	Ppp1r9b
ENSMUSG00000026576	3984.64	-0.584889	0.119275	1.44339e-07	3.88185e-06	Atp1b1
ENSMUSG00000111862	78.9817	-0.584937	0.267764	0.00323745	0.0199205	Gm47828
ENSMUSG00000014542	198.047	-0.585294	0.280795	0.00404643	0.0238809	Clec4f
ENSMUSG00000021904	160.665	-0.586789	0.236129	0.00150593	0.0107783	Sema3g
ENSMUSG00000031828	480.838	-0.587125	0.171219	8.54232e-05	0.00101221	Klhl36
ENSMUSG00000017417	2277.76	-0.587801	0.118837	1.14766e-07	3.16788e-06	Plxdc1
ENSMUSG00000022514	634.74	-0.588797	0.148023	9.94226e-06	0.000160154	Il1rap
ENSMUSG00000020585	4068.97	-0.58965	0.0566393	3.65359e-26	1.11302e-23	Laptm4a
ENSMUSG00000027936	1337.32	-0.589765	0.115464	4.96368e-08	1.49311e-06	Crtc2
ENSMUSG00000067377	3809.86	-0.590955	0.128038	5.10895e-07	1.18725e-05	Tspan6
ENSMUSG00000029924	191.462	-0.591187	0.264818	0.00281908	0.0178106	Slc37a3
ENSMUSG00000044224	5081.95	-0.591626	0.141532	4.37011e-06	7.87324e-05	Dnajc21
ENSMUSG00000005534	231.454	-0.592234	0.240621	0.00160229	0.0112705	Insr
ENSMUSG00000031629	489.962	-0.593364	0.145728	6.82417e-06	0.000115494	Cenpu
ENSMUSG00000047123	171.013	-0.593427	0.33933	0.00737434	0.0384673	Ticam1
ENSMUSG00000025932	320.348	-0.59385	0.266632	0.00289206	0.0181734	Eya1
ENSMUSG00000019866	525.615	-0.594493	0.243809	0.00169439	0.0117897	Crybg1
ENSMUSG00000036792	165.274	-0.594643	0.343677	0.00751236	0.0390294	Mbd5
ENSMUSG00000020901	616.907	-0.5947	0.203937	0.000390427	0.00356685	Pik3r5
ENSMUSG00000040669	1053.58	-0.596566	0.131684	8.75571e-07	1.9227e-05	Phc1
ENSMUSG00000002625	1301.94	-0.597466	0.149212	8.61338e-06	0.000141487	Akap8l
ENSMUSG00000016179	407.568	-0.598616	0.240776	0.00152163	0.0108628	Camk1g
ENSMUSG00000097705	609.023	-0.59908	0.137549	1.97847e-06	3.96522e-05	Gm26740
ENSMUSG00000042708	76.6349	-0.59926	0.378067	0.00940359	0.0460828	Shcbp1l
ENSMUSG00000024190	883.542	-0.599956	0.196908	0.000313071	0.00296692	Dusp1
ENSMUSG00000045092	952.675	-0.60081	0.208617	0.000557171	0.00480584	S1pr1
ENSMUSG00000031506	9674.75	-0.600945	0.0788719	4.83349e-15	5.06157e-13	Ptpn7
ENSMUSG00000048118	2327.83	-0.601507	0.0780704	1.99026e-15	2.25316e-13	Arid4a
ENSMUSG00000042810	373.493	-0.601672	0.307598	0.00500303	0.0283482	Krba1
ENSMUSG00000042055	2486.18	-0.603887	0.107092	2.38759e-09	9.6862e-08	Wdr11
ENSMUSG00000052087	652.017	-0.603913	0.0983943	1.30827e-10	6.64244e-09	Rgs14
ENSMUSG00000090124	306.415	-0.604306	0.147723	6.17579e-06	0.000105803	Ugt1a7c
ENSMUSG00000047656	89.6412	-0.604464	0.374427	0.00876589	0.0438164	Trpt1
ENSMUSG00000031887	1641.6	-0.604604	0.115035	2.15525e-08	7.15072e-07	Tradd
ENSMUSG00000027712	1298.19	-0.604683	0.149212	7.2484e-06	0.000121465	Anxa5
ENSMUSG00000020178	564.299	-0.604825	0.197238	0.000258205	0.00252111	Adora2a
ENSMUSG00000041750	227.076	-0.605369	0.198203	0.000273474	0.00264877	Cd1d2
ENSMUSG00000027742	3071.97	-0.605487	0.08836	1.60304e-12	1.15772e-10	Cog6
ENSMUSG00000020564	599.172	-0.605604	0.139124	1.95822e-06	3.93405e-05	Atxn7l1
ENSMUSG00000015766	1688.31	-0.605666	0.151344	8.70334e-06	0.000142825	Eps8
ENSMUSG00000026360	1978.72	-0.605779	0.114243	1.97614e-08	6.64279e-07	Rgs2
ENSMUSG00000054619	566.643	-0.606672	0.154523	1.21118e-05	0.0001886	Mettl7a1
ENSMUSG00000024985	1135.14	-0.606933	0.162381	2.53755e-05	0.000359398	Tcf7l2
ENSMUSG00000039168	3066.61	-0.607193	0.148836	5.82455e-06	0.000100505	Dap
ENSMUSG00000032743	297.867	-0.607542	0.303354	0.00380677	0.0227794	D430042O09Rik
ENSMUSG00000097571	130.52	-0.608721	0.229248	0.000935738	0.00728545	Jpx
ENSMUSG00000022353	926.513	-0.610596	0.108569	2.68817e-09	1.0801e-07	Mtss1
ENSMUSG00000022048	2756.92	-0.610872	0.0838451	5.3086e-14	4.78202e-12	Dpysl2
ENSMUSG00000035847	341.797	-0.610927	0.228743	0.000898059	0.00705107	Ids
ENSMUSG00000021661	780.637	-0.611887	0.142142	2.2602e-06	4.43439e-05	Ankra2
ENSMUSG00000073481	3873.47	-0.612511	0.095974	2.63866e-11	1.55672e-09	Marc2
ENSMUSG00000032750	123.996	-0.612604	0.261771	0.00210059	0.0140669	Gab3
ENSMUSG00000033467	360.55	-0.614098	0.184625	0.000114719	0.00128397	Crlf2
ENSMUSG00000038507	1020.59	-0.61458	0.143406	2.61977e-06	5.05113e-05	Parp12
ENSMUSG00000038776	214.534	-0.614858	0.261935	0.00200578	0.0135239	Ephx1
ENSMUSG00000028795	556.544	-0.614953	0.145845	3.59034e-06	6.62513e-05	Ccdc28b
ENSMUSG00000031402	10877.9	-0.615245	0.102651	2.25163e-10	1.11616e-08	Mpp1
ENSMUSG00000036362	128.309	-0.616592	0.406425	0.00916572	0.0453071	P2ry13
ENSMUSG00000024885	550.858	-0.617222	0.146202	3.3626e-06	6.23924e-05	Aldh3b1
ENSMUSG00000031453	9955.69	-0.617418	0.098066	3.2873e-11	1.89927e-09	Rasa3
ENSMUSG00000043243	2379.07	-0.619472	0.143528	2.14926e-06	4.24157e-05	Fam129c
ENSMUSG00000055150	97.3015	-0.619551	0.376679	0.00772175	0.0398086	Zfp78
ENSMUSG00000030649	340.642	-0.620848	0.123118	6.5856e-08	1.92568e-06	Anapc15
ENSMUSG00000030761	4074.74	-0.622218	0.169258	2.67245e-05	0.000375016	Myo7a
ENSMUSG00000036402	1456.57	-0.622236	0.148567	3.76609e-06	6.90008e-05	Gng12
ENSMUSG00000026342	465.951	-0.623011	0.212178	0.000344361	0.00320187	Slc35f5
ENSMUSG00000037580	759.329	-0.624367	0.110458	2.26004e-09	9.23585e-08	Gch1
ENSMUSG00000027834	227.257	-0.624727	0.337565	0.00556498	0.0309053	Serpini1
ENSMUSG00000022228	144.697	-0.624733	0.233356	0.000830036	0.00661935	Zscan26
ENSMUSG00000025921	295.232	-0.624875	0.257461	0.00160874	0.0113017	Rdh10
ENSMUSG00000090841	8976.87	-0.625291	0.0695861	3.81586e-20	6.94943e-18	Myl6
ENSMUSG00000045273	2663.46	-0.627697	0.120116	2.50269e-08	8.13481e-07	Cenph
ENSMUSG00000030047	3265.32	-0.629086	0.112486	3.30635e-09	1.30348e-07	Arhgap25
ENSMUSG00000028211	3660.21	-0.629157	0.230879	0.000571751	0.00490511	Trp53inp1
ENSMUSG00000037754	2966.34	-0.629802	0.143285	1.48191e-06	3.08056e-05	Ppp1r16b
ENSMUSG00000029275	1181.1	-0.630469	0.153865	5.54858e-06	9.63768e-05	Gfi1
ENSMUSG00000026117	432.551	-0.631285	0.200702	0.000192623	0.00197605	Zap70
ENSMUSG00000032366	880.779	-0.632059	0.122895	3.79835e-08	1.17959e-06	Tpm1
ENSMUSG00000023873	242.465	-0.63221	0.257754	0.00149706	0.0107194	1700010I14Rik
ENSMUSG00000024781	1613.4	-0.634386	0.110701	1.30884e-09	5.60193e-08	Lipa
ENSMUSG00000074364	414.333	-0.636105	0.237153	0.000804622	0.00645045	Ehd2
ENSMUSG00000044068	72.2773	-0.636201	0.295465	0.00292293	0.0183354	Zrsr1
ENSMUSG00000059554	234.708	-0.636276	0.168768	2.11827e-05	0.000307553	Ccdc28a
ENSMUSG00000059981	1091.53	-0.6363	0.284805	0.0024321	0.0158683	Taok2
ENSMUSG00000038352	5971.21	-0.636312	0.103594	8.91559e-11	4.77255e-09	Arl5c
ENSMUSG00000028145	303.186	-0.636486	0.167075	1.79079e-05	0.000264825	Them4
ENSMUSG00000079038	129.262	-0.636776	0.414962	0.00883992	0.0440812	D130040H23Rik
ENSMUSG00000037664	62.3597	-0.637298	0.328473	0.00437345	0.025417	Cdkn1c
ENSMUSG00000039713	179.06	-0.637413	0.196273	0.000137918	0.00150346	Plekhg5
ENSMUSG00000025212	900.547	-0.637797	0.123503	3.26816e-08	1.03512e-06	Sfxn3
ENSMUSG00000057606	1996.9	-0.638224	0.133583	2.3938e-07	6.17049e-06	Colq
ENSMUSG00000032715	525.624	-0.638763	0.214001	0.000317406	0.00299613	Trib3
ENSMUSG00000028766	5573.49	-0.638964	0.11671	5.86598e-09	2.19385e-07	Alpl
ENSMUSG00000024978	3172.36	-0.639541	0.231301	0.000626813	0.00529614	Gpam
ENSMUSG00000048249	414.551	-0.640177	0.260725	0.00146982	0.0105831	Crebrf
ENSMUSG00000002668	486.494	-0.64023	0.152805	3.6303e-06	6.69149e-05	Dennd1c
ENSMUSG00000004626	3150.54	-0.6431	0.0832304	1.56832e-15	1.79981e-13	Stxbp2
ENSMUSG00000097815	192.281	-0.644609	0.217026	0.000336853	0.00314954	Gm26809
ENSMUSG00000026361	3331.12	-0.644809	0.125252	3.8774e-08	1.19552e-06	Cdc73
ENSMUSG00000043157	826.376	-0.645244	0.160401	7.29351e-06	0.000121959	Arl11
ENSMUSG00000039158	4983.03	-0.646663	0.138957	3.41341e-07	8.3736e-06	Akna
ENSMUSG00000046985	13148.2	-0.647542	0.101256	2.18914e-11	1.31466e-09	Tapt1
ENSMUSG00000045827	493.951	-0.647997	0.210178	0.00023275	0.00231383	Serpinb9
ENSMUSG00000022237	913.2	-0.648069	0.205089	0.000178029	0.00184242	Ankrd33b
ENSMUSG00000085936	909.751	-0.648284	0.144106	8.11804e-07	1.79918e-05	2610307P16Rik
ENSMUSG00000029571	1975.5	-0.64834	0.146468	1.23425e-06	2.60452e-05	Tmem106b
ENSMUSG00000030035	1442.44	-0.648656	0.152523	2.89722e-06	5.4604e-05	Wbp1
ENSMUSG00000027306	20379.8	-0.649809	0.0870035	1.08677e-14	1.09035e-12	Nusap1
ENSMUSG00000062510	3192.23	-0.649815	0.0677017	1.11782e-22	2.88141e-20	Nsl1
ENSMUSG00000027495	304.223	-0.650666	0.185194	5.16356e-05	0.000655421	Fam210b
ENSMUSG00000026585	715.784	-0.651087	0.108962	3.09045e-10	1.50088e-08	Kifap3
ENSMUSG00000072621	363.683	-0.65144	0.227285	0.000451704	0.00403858	Slfn10-ps
ENSMUSG00000052155	308.94	-0.652762	0.185183	5.1242e-05	0.000650917	Acvr2a
ENSMUSG00000031813	2193.5	-0.653371	0.091696	5.92784e-14	5.25508e-12	Mvb12a
ENSMUSG00000066442	70.1064	-0.654182	0.289654	0.00227885	0.0150205	Mthfs
ENSMUSG00000043372	183.764	-0.65474	0.21642	0.000261368	0.00254606	Hexim2
ENSMUSG00000049744	5778.83	-0.654945	0.097414	2.16043e-12	1.53381e-10	Arhgap15
ENSMUSG00000000078	1217.06	-0.656664	0.130193	5.91883e-08	1.74288e-06	Klf6
ENSMUSG00000044252	911.987	-0.657156	0.127236	3.39838e-08	1.06829e-06	Osbpl1a
ENSMUSG00000026767	1090.35	-0.657192	0.0994769	4.70964e-12	3.18185e-10	Mindy3
ENSMUSG00000018102	381.942	-0.657864	0.239548	0.000613551	0.00520772	Hist1h2bc
ENSMUSG00000045795	625.642	-0.657958	0.134264	1.20333e-07	3.29979e-06	Whamm
ENSMUSG00000043336	565.333	-0.659287	0.179073	2.45944e-05	0.00034922	Filip1l
ENSMUSG00000038967	521.155	-0.660127	0.202336	0.000123612	0.00136618	Pdk2
ENSMUSG00000026883	431.458	-0.662759	0.261273	0.00107435	0.00813776	Dab2ip
ENSMUSG00000026473	1728.6	-0.662901	0.131986	6.6042e-08	1.92776e-06	Glul
ENSMUSG00000079505	155.735	-0.663984	0.206417	0.000145362	0.00155726	Gm11131
ENSMUSG00000116380	227.698	-0.665705	0.185927	3.96458e-05	0.000521811	AC139671.1
ENSMUSG00000040557	262.356	-0.667383	0.248139	0.000716798	0.00591623	Mettl27
ENSMUSG00000079427	537.715	-0.667805	0.149987	1.07666e-06	2.29802e-05	Mthfsl
ENSMUSG00000038175	827.046	-0.668461	0.142219	3.23431e-07	8.0164e-06	Mylip
ENSMUSG00000001138	1221.84	-0.670292	0.127876	1.97837e-08	6.64279e-07	Cnnm3
ENSMUSG00000079414	96.0871	-0.670549	0.262002	0.000992254	0.00764378	Gm11110
ENSMUSG00000021114	5448.82	-0.670846	0.0945175	1.75503e-13	1.48272e-11	Atp6v1d
ENSMUSG00000024677	263.788	-0.67296	0.304957	0.00237786	0.0155414	Ms4a6b
ENSMUSG00000035891	4644.01	-0.674197	0.140076	1.78888e-07	4.74253e-06	Cerk
ENSMUSG00000041538	4666.75	-0.676608	0.103092	6.88021e-12	4.5207e-10	H2-Ob
ENSMUSG00000003363	767.396	-0.676873	0.130531	2.65206e-08	8.52883e-07	Pld3
ENSMUSG00000030921	3468.62	-0.678062	0.106423	2.29426e-11	1.37287e-09	Trim30a
ENSMUSG00000032714	128.977	-0.679113	0.355488	0.00444733	0.0257392	Syde1
ENSMUSG00000070780	112.869	-0.679394	0.317639	0.00262216	0.0168395	Rbm47
ENSMUSG00000040746	3397.23	-0.679394	0.107354	3.09482e-11	1.80048e-09	Rnf167
ENSMUSG00000044167	5680.77	-0.679783	0.0795488	1.7218e-18	2.75021e-16	Foxo1
ENSMUSG00000001173	234.36	-0.680603	0.210435	0.000131712	0.00144203	Ocrl
ENSMUSG00000014668	2032.87	-0.680809	0.0838658	6.29506e-17	8.71684e-15	Chfr
ENSMUSG00000028459	3403	-0.681453	0.122688	3.27634e-09	1.2947e-07	Cd72
ENSMUSG00000070730	1296.78	-0.683852	0.0847032	8.05195e-17	1.07072e-14	Rmdn3
ENSMUSG00000074272	1061.37	-0.683918	0.100678	1.3904e-12	1.01288e-10	Ceacam1
ENSMUSG00000023959	206.367	-0.684395	0.379957	0.00516515	0.0290996	Clic5
ENSMUSG00000035473	118.81	-0.684538	0.301518	0.00198665	0.0134167	Galm
ENSMUSG00000090290	3821.41	-0.685701	0.184428	2.22128e-05	0.000319464	Tarbp1
ENSMUSG00000027219	1701.2	-0.687448	0.132091	2.33365e-08	7.65171e-07	Slc28a2
ENSMUSG00000042671	186.383	-0.688512	0.342145	0.00359198	0.0216722	Rgs8
ENSMUSG00000031431	5098.13	-0.689617	0.154794	9.23709e-07	2.01258e-05	Tsc22d3
ENSMUSG00000056144	593.462	-0.690122	0.145419	2.5212e-07	6.46903e-06	Trim34a
ENSMUSG00000040296	929.04	-0.691238	0.170217	5.70186e-06	9.86928e-05	Ddx58
ENSMUSG00000047657	137.842	-0.693486	0.177642	1.04532e-05	0.000166328	Crry-ps
ENSMUSG00000007908	686.16	-0.694277	0.213309	0.000116592	0.00130147	Hmgcll1
ENSMUSG00000038225	430.697	-0.694379	0.142994	1.42386e-07	3.84168e-06	Primpol
ENSMUSG00000025878	2488.26	-0.695164	0.0982307	1.76104e-13	1.48272e-11	Uimc1
ENSMUSG00000057143	561.111	-0.695364	0.185985	1.92515e-05	0.000282451	Trim12c
ENSMUSG00000028073	808.588	-0.695572	0.216143	0.000133783	0.00146219	Pear1
ENSMUSG00000042042	463.051	-0.696705	0.205122	7.29826e-05	0.00088739	Csgalnact2
ENSMUSG00000035578	144.278	-0.697727	0.217778	0.000140736	0.00152327	Iqcg
ENSMUSG00000040877	180.358	-0.698542	0.251329	0.000509428	0.00445019	Wdr25
ENSMUSG00000005268	140.043	-0.699535	0.288546	0.00134757	0.00985961	Prlr
ENSMUSG00000030060	2698.95	-0.699738	0.0932185	7.22871e-15	7.43049e-13	Hmces
ENSMUSG00000049396	32.0454	-0.700006	0.380141	0.00454259	0.0262	Gemin4
ENSMUSG00000006356	762.989	-0.700208	0.153189	5.58512e-07	1.2819e-05	Crip2
ENSMUSG00000030217	1442.03	-0.700246	0.12062	7.60861e-10	3.39048e-08	Art4
ENSMUSG00000035711	3151.4	-0.700421	0.154424	4.71847e-07	1.11292e-05	Dok3
ENSMUSG00000056895	120.964	-0.70044	0.376809	0.00443869	0.0257159	Hist3h2ba
ENSMUSG00000022831	5775.09	-0.700624	0.0966799	6.61913e-14	5.83703e-12	Hcls1
ENSMUSG00000069516	5287.57	-0.700798	0.105674	4.12611e-12	2.81029e-10	Lyz2
ENSMUSG00000040613	922.348	-0.70087	0.10926	1.7448e-11	1.06694e-09	Apobec1
ENSMUSG00000032369	142.169	-0.701443	0.291388	0.00137082	0.00999361	Plscr1
ENSMUSG00000026383	367.634	-0.702833	0.271284	0.000758954	0.00616696	Epb41l5
ENSMUSG00000039853	591.79	-0.706043	0.138428	4.27187e-08	1.29665e-06	Trim14
ENSMUSG00000027082	514.533	-0.70641	0.234634	0.000241004	0.00237828	Tfpi
ENSMUSG00000030924	737.171	-0.70734	0.153649	4.63664e-07	1.09572e-05	Rexo5
ENSMUSG00000034848	627.492	-0.70804	0.168462	2.89579e-06	5.4604e-05	Ttc21b
ENSMUSG00000097589	1194.75	-0.708558	0.185552	1.4495e-05	0.000221794	Dleu2
ENSMUSG00000085347	35.4259	-0.710359	0.34356	0.00298768	0.0186161	Hk1os
ENSMUSG00000003847	289.854	-0.710568	0.359112	0.00340254	0.0207458	Nfat5
ENSMUSG00000038831	228.474	-0.71703	0.368888	0.00353029	0.021377	Ralgps1
ENSMUSG00000030672	592.153	-0.717889	0.129875	3.91234e-09	1.52091e-07	Mylpf
ENSMUSG00000031933	114.997	-0.718469	0.379714	0.00398881	0.0236241	Izumo1r
ENSMUSG00000029771	2381.84	-0.718639	0.105689	1.2342e-12	9.06974e-11	Irf5
ENSMUSG00000041974	2105.35	-0.719	0.0992096	4.87129e-14	4.41181e-12	Spidr
ENSMUSG00000034121	267.938	-0.720012	0.194719	2.24705e-05	0.000322617	Mks1
ENSMUSG00000096210	5195.2	-0.720673	0.127565	1.81007e-09	7.46987e-08	H1f0
ENSMUSG00000027778	1584.43	-0.722381	0.168743	2.04567e-06	4.06516e-05	Ift80
ENSMUSG00000039701	144.805	-0.722982	0.347365	0.00247942	0.0161394	Usp53
ENSMUSG00000044080	164	-0.726363	0.223829	0.000115147	0.00128691	S100a1
ENSMUSG00000049717	953.088	-0.727111	0.131826	4.00449e-09	1.54954e-07	Lig4
ENSMUSG00000022003	223.091	-0.727432	0.264056	0.000485286	0.00428824	Slc25a30
ENSMUSG00000032599	253.64	-0.727904	0.189374	1.26604e-05	0.000196776	Ip6k2
ENSMUSG00000020527	285.135	-0.729326	0.252921	0.000333373	0.00312222	Myo19
ENSMUSG00000042207	749.742	-0.732521	0.259141	0.000407069	0.00369071	Kdm5b
ENSMUSG00000032187	35374.2	-0.733631	0.127013	7.8439e-10	3.48606e-08	Smarca4
ENSMUSG00000114279	122.244	-0.737285	0.248256	0.000270215	0.00262309	Hist1h2bm
ENSMUSG00000084925	25.5992	-0.738523	0.433793	0.00543665	0.0303328	1810062O18Rik
ENSMUSG00000028460	1566.03	-0.741179	0.157365	2.5825e-07	6.57597e-06	Sit1
ENSMUSG00000026664	2079.48	-0.74646	0.100352	9.9463e-15	1.01616e-12	Phyh
ENSMUSG00000044629	488.721	-0.746917	0.148266	5.00975e-08	1.50427e-06	Cnrip1
ENSMUSG00000033105	539.335	-0.74855	0.150361	6.84209e-08	1.98338e-06	Lss
ENSMUSG00000073482	29.532	-0.750156	0.478456	0.00631392	0.0341728	Gm10517
ENSMUSG00000006763	1804.82	-0.752842	0.120597	5.28806e-11	2.93382e-09	Saal1
ENSMUSG00000109684	372.371	-0.753641	0.205093	2.20188e-05	0.000317747	Gm45745
ENSMUSG00000029759	860.157	-0.75419	0.121664	5.7696e-11	3.17992e-09	Pon3
ENSMUSG00000071573	212.067	-0.756041	0.180886	2.96713e-06	5.5796e-05	Rnls
ENSMUSG00000022297	323.597	-0.756579	0.259087	0.000301714	0.00287555	Fzd6
ENSMUSG00000060675	962.381	-0.758475	0.116364	7.84965e-12	5.13754e-10	Pla2g16
ENSMUSG00000039478	71.9838	-0.758708	0.348206	0.00207449	0.0139255	Micu3
ENSMUSG00000070501	559.356	-0.75888	0.191689	7.11848e-06	0.000119629	Ifi214
ENSMUSG00000028093	8562.35	-0.760078	0.1174	1.00425e-11	6.39778e-10	Acp6
ENSMUSG00000025151	2299.89	-0.761224	0.130642	6.11138e-10	2.79771e-08	Maged1
ENSMUSG00000033429	449.239	-0.762626	0.152021	5.51522e-08	1.64134e-06	Mcee
ENSMUSG00000038393	2244.11	-0.763063	0.119791	2.04131e-11	1.23473e-09	Txnip
ENSMUSG00000082576	27.2458	-0.763543	0.625304	0.0085718	0.0429615	Gm12058
ENSMUSG00000034427	99.0745	-0.764401	0.449045	0.00489492	0.0278487	Myo15b
ENSMUSG00000015291	5174.86	-0.765495	0.135343	1.61562e-09	6.75692e-08	Gdi1
ENSMUSG00000085417	825.753	-0.766241	0.141347	6.1941e-09	2.3114e-07	Gm13919
ENSMUSG00000026029	8106.85	-0.769084	0.105058	2.43796e-14	2.25679e-12	Casp8
ENSMUSG00000024238	739.419	-0.772327	0.191956	5.09937e-06	8.96537e-05	Zeb1
ENSMUSG00000108617	48.4022	-0.77291	0.375901	0.00261851	0.016829	Gm31749
ENSMUSG00000027993	294.783	-0.773862	0.215675	3.0131e-05	0.000414487	Trim2
ENSMUSG00000022014	1170.01	-0.774532	0.0932819	1.09949e-17	1.64482e-15	Epsti1
ENSMUSG00000075010	2118.19	-0.778116	0.0941264	1.46368e-17	2.17026e-15	AW112010
ENSMUSG00000045362	814.113	-0.778214	0.167519	3.36243e-07	8.26062e-06	Tnfrsf26
ENSMUSG00000001761	276.315	-0.778539	0.213918	2.52996e-05	0.000358624	Smo
ENSMUSG00000022177	5985.79	-0.779236	0.0816403	1.6206e-22	4.0527e-20	Haus4
ENSMUSG00000022639	103.803	-0.77928	0.400693	0.00323434	0.0199087	Dubr
ENSMUSG00000008398	1604.65	-0.779659	0.126599	7.7544e-11	4.19113e-09	Elk3
ENSMUSG00000059336	584.204	-0.780635	0.162865	1.56317e-07	4.18386e-06	Slc14a1
ENSMUSG00000079606	130.304	-0.781477	0.426108	0.00378919	0.0226824	Gm595
ENSMUSG00000050957	625.738	-0.784391	0.148616	1.32562e-08	4.65634e-07	Insl6
ENSMUSG00000024866	624.311	-0.784789	0.163299	1.50127e-07	4.0246e-06	Acy3
ENSMUSG00000036769	545.8	-0.785381	0.209663	1.58439e-05	0.000239158	Wdr44
ENSMUSG00000031840	285.077	-0.78773	0.170134	3.59511e-07	8.75523e-06	Rab3a
ENSMUSG00000047180	130.214	-0.787954	0.563463	0.00703826	0.0371304	Neurl3
ENSMUSG00000020160	482.394	-0.78997	0.146503	6.83248e-09	2.54396e-07	Meis1
ENSMUSG00000000903	24534.2	-0.790175	0.106808	1.45137e-14	1.41431e-12	Vpreb3
ENSMUSG00000023055	798.34	-0.792142	0.191138	3.17654e-06	5.92024e-05	Calcoco1
ENSMUSG00000028894	3099.74	-0.792346	0.0789521	8.8974e-25	2.57027e-22	Inpp5b
ENSMUSG00000040158	637.393	-0.795979	0.156006	3.15106e-08	1.00182e-06	Tax1bp3
ENSMUSG00000023348	633.461	-0.797011	0.120368	3.70144e-12	2.55216e-10	Trip6
ENSMUSG00000043411	2870.8	-0.79916	0.0991208	7.84084e-17	1.05674e-14	Usp48
ENSMUSG00000046997	158.416	-0.800542	0.323584	0.000923188	0.00719777	Spsb4
ENSMUSG00000041754	39.9631	-0.807341	2.16241	0.00797436	0.0408095	Trem3
ENSMUSG00000072663	258.376	-0.810952	0.259135	0.000138893	0.00150722	Spef2
ENSMUSG00000026471	655.514	-0.811248	0.206429	7.71436e-06	0.000128228	Mr1
ENSMUSG00000075312	53.2388	-0.812049	0.332648	0.000985297	0.00759717	Gm13597
ENSMUSG00000017830	801.69	-0.812809	0.133271	1.05184e-10	5.49019e-09	Dhx58
ENSMUSG00000032596	3186.67	-0.815577	0.116472	2.31327e-13	1.9093e-11	Uba7
ENSMUSG00000043987	2451.32	-0.815654	0.106126	1.51913e-15	1.75539e-13	Cep164
ENSMUSG00000021880	136.205	-0.815976	0.53893	0.00512492	0.0289215	Rnase6
ENSMUSG00000031521	612.738	-0.816573	0.164667	5.82548e-08	1.71918e-06	Aga
ENSMUSG00000006276	2478.68	-0.82035	0.100336	3.6371e-17	5.16437e-15	Eps15l1
ENSMUSG00000055692	171.388	-0.823465	0.236297	3.90165e-05	0.000515553	Tmem191c
ENSMUSG00000071716	53.8099	-0.824517	0.37899	0.00183879	0.0126318	Apol7e
ENSMUSG00000043004	625.685	-0.826942	0.134034	6.81441e-11	3.71907e-09	Gng2
ENSMUSG00000040183	251.695	-0.827193	0.346507	0.000896634	0.00704318	Ankrd6
ENSMUSG00000071669	203	-0.827293	0.315768	0.000615842	0.0052166	Snx29
ENSMUSG00000046688	25093.7	-0.828946	0.128535	1.13503e-11	7.1764e-10	Tifa
ENSMUSG00000041353	891.395	-0.833222	0.129842	1.46834e-11	9.17984e-10	Tmem29
ENSMUSG00000071724	62.0699	-0.838375	0.412874	0.00231861	0.0152395	Smpd5
ENSMUSG00000005447	2326.49	-0.847238	0.104099	3.80565e-17	5.35829e-15	Pafah1b3
ENSMUSG00000036292	170.866	-0.848891	0.256205	6.59528e-05	0.000808369	Gramd1c
ENSMUSG00000004665	2472.21	-0.850823	0.112885	4.64667e-15	4.92753e-13	Cnn2
ENSMUSG00000024766	1492.37	-0.852105	0.135299	2.8537e-11	1.67181e-09	Lipo3
ENSMUSG00000027940	30410.2	-0.852617	0.0561192	3.90416e-53	2.97338e-50	Tpm3
ENSMUSG00000059851	2058.74	-0.852706	0.0606712	3.00045e-46	1.86195e-43	Kmt5c
ENSMUSG00000022558	570.041	-0.85274	0.281417	0.000173835	0.00181132	Mroh1
ENSMUSG00000066621	1374	-0.852908	0.139691	9.11094e-11	4.86158e-09	Tecpr1
ENSMUSG00000036923	188.96	-0.855035	0.209468	3.74812e-06	6.88594e-05	Stox1
ENSMUSG00000084497	27.5597	-0.855795	0.40702	0.00208724	0.0139999	Gm22107
ENSMUSG00000057069	818.934	-0.856026	0.154187	2.89189e-09	1.15918e-07	Ero1lb
ENSMUSG00000059810	444.426	-0.856487	0.252172	5.27484e-05	0.000668026	Rgs3
ENSMUSG00000056498	788.856	-0.856624	0.170607	4.45563e-08	1.34755e-06	Tmem154
ENSMUSG00000026740	763.312	-0.856663	0.112165	2.05486e-15	2.31069e-13	Dnajc1
ENSMUSG00000028689	456.967	-0.857346	0.136344	2.9567e-11	1.72611e-09	Ccdc163
ENSMUSG00000032515	1439.35	-0.858397	0.130056	3.77588e-12	2.59282e-10	Csrnp1
ENSMUSG00000001053	2907.45	-0.859359	0.140008	7.5115e-11	4.08621e-09	N4bp3
ENSMUSG00000042997	300.857	-0.861309	0.240587	2.74657e-05	0.000384772	Nhlrc3
ENSMUSG00000025020	647.021	-0.861478	0.316098	0.000416264	0.00375781	Slit1
ENSMUSG00000033111	713.99	-0.86164	0.125054	5.04668e-13	3.95126e-11	3830406C13Rik
ENSMUSG00000002996	1113.65	-0.863108	0.147017	4.00274e-10	1.8786e-08	Hbp1
ENSMUSG00000026707	359.728	-0.863986	0.170772	3.70464e-08	1.15589e-06	Nsun6
ENSMUSG00000006344	88.9908	-0.864356	0.449978	0.00235426	0.0154205	Ggt5
ENSMUSG00000003031	350.584	-0.865358	0.181356	1.60933e-07	4.30054e-06	Cdkn1b
ENSMUSG00000028101	776.494	-0.86722	0.16411	9.82095e-09	3.53871e-07	Pias3
ENSMUSG00000092341	1622.96	-0.86754	0.242641	2.54721e-05	0.000360128	Malat1
ENSMUSG00000019820	1281.24	-0.8686	0.13638	1.84868e-11	1.12227e-09	Utrn
ENSMUSG00000021338	138.096	-0.868941	0.558571	0.0049188	0.0279562	Carmil1
ENSMUSG00000020701	402.594	-0.869177	0.357189	0.000863829	0.00684324	Tmem132e
ENSMUSG00000008384	332.638	-0.869866	0.190657	4.21139e-07	1.00516e-05	Sertad1
ENSMUSG00000042632	271.817	-0.870439	0.204856	1.57739e-06	3.24682e-05	Pla2g6
ENSMUSG00000032125	173.209	-0.872774	0.39202	0.0013921	0.0100973	Robo4
ENSMUSG00000070315	116.013	-0.873554	0.301886	0.000272406	0.00264282	4930581F22Rik
ENSMUSG00000031789	41.1821	-0.874713	0.447925	0.00251211	0.0162826	Cngb1
ENSMUSG00000033114	176.167	-0.876739	0.296337	0.000215242	0.0021699	Slc35d2
ENSMUSG00000032688	659.981	-0.878384	0.223854	6.95402e-06	0.0001171	Malt1
ENSMUSG00000030137	52.9863	-0.882822	0.331922	0.00051255	0.0044728	Tuba8
ENSMUSG00000087269	106.1	-0.884203	0.285386	0.00014165	0.00153119	D330023K18Rik
ENSMUSG00000029338	502.28	-0.885937	0.156946	1.43278e-09	6.04689e-08	Antxr2
ENSMUSG00000020577	35832.3	-0.888456	0.130809	1.00889e-12	7.51285e-11	Tspan13
ENSMUSG00000060579	45.5445	-0.889968	0.391863	0.00138239	0.0100442	Fhit
ENSMUSG00000026778	295.586	-0.89071	0.278459	8.95764e-05	0.00105323	Prkcq
ENSMUSG00000039770	1680.93	-0.893054	0.134647	2.90396e-12	2.02732e-10	Ypel5
ENSMUSG00000031925	280.518	-0.893293	0.2631	5.03965e-05	0.000641636	Maml2
ENSMUSG00000015224	958.901	-0.899126	0.148309	1.09584e-10	5.64529e-09	Cyp2j9
ENSMUSG00000087165	67.8179	-0.90069	0.298788	0.00017504	0.00181823	2010001A14Rik
ENSMUSG00000097636	333.698	-0.903097	0.225089	4.64058e-06	8.28923e-05	Mirt1
ENSMUSG00000032350	5376.46	-0.905096	0.0952502	1.97649e-22	4.79943e-20	Gclc
ENSMUSG00000020227	1342.35	-0.90522	0.0955947	2.60254e-22	6.22937e-20	Irak3
ENSMUSG00000037235	586.382	-0.907861	0.238157	8.90545e-06	0.000145714	Mxd4
ENSMUSG00000041679	98.9935	-0.908142	0.444964	0.00211254	0.0141313	Lrrc29
ENSMUSG00000034614	2311.27	-0.910097	0.124601	2.36115e-14	2.19783e-12	Pik3ip1
ENSMUSG00000052605	188.767	-0.910233	0.265396	4.36671e-05	0.000567164	Isoc2b
ENSMUSG00000013707	640.744	-0.913976	0.132448	4.6869e-13	3.6868e-11	Tnfaip8l2
ENSMUSG00000028494	2030.17	-0.915681	0.0975593	5.23935e-22	1.20254e-19	Plin2
ENSMUSG00000038065	259.441	-0.916091	0.31139	0.000206538	0.00208966	Mturn
ENSMUSG00000029468	191.634	-0.918181	0.193734	1.78006e-07	4.73412e-06	P2rx7
ENSMUSG00000037847	621.976	-0.922104	0.132209	2.54689e-13	2.09182e-11	Nmrk1
ENSMUSG00000042265	297.071	-0.926128	0.176966	1.3846e-08	4.85333e-07	Trem1
ENSMUSG00000043263	10177.8	-0.926686	0.145854	1.60344e-11	9.87705e-10	Ifi209
ENSMUSG00000058135	1246.79	-0.928489	0.161298	6.62274e-10	2.99903e-08	Gstm1
ENSMUSG00000048120	1439.9	-0.933211	0.177917	1.46811e-08	5.11396e-07	Entpd1
ENSMUSG00000028525	4696.76	-0.934705	0.106958	2.04812e-19	3.65066e-17	Pde4b
ENSMUSG00000106219	216.497	-0.937347	0.222737	1.94134e-06	3.90482e-05	5830416I19Rik
ENSMUSG00000021466	585.224	-0.943628	0.246321	9.04163e-06	0.000147223	Ptch1
ENSMUSG00000028397	1377.86	-0.954142	0.165042	5.66812e-10	2.6019e-08	Kdm4c
ENSMUSG00000025723	37.0804	-0.955851	0.339941	0.000318542	0.00300348	Nmb
ENSMUSG00000027215	1051.31	-0.957663	0.120243	1.52784e-16	1.93931e-14	Cd82
ENSMUSG00000001029	1756.85	-0.96269	0.092143	1.25771e-26	3.90241e-24	Icam2
ENSMUSG00000102703	98.144	-0.964051	0.366147	0.000498548	0.00437568	Gm38313
ENSMUSG00000029863	6514.46	-0.964598	0.108117	2.83996e-20	5.22896e-18	Casp2
ENSMUSG00000025006	322.926	-0.967312	0.165172	3.47525e-10	1.6542e-08	Sorbs1
ENSMUSG00000071454	1108.73	-0.967708	0.10657	8.38781e-21	1.65339e-18	Dtnb
ENSMUSG00000038070	861.312	-0.96845	0.141749	6.75058e-13	5.16466e-11	Cntln
ENSMUSG00000112805	144.24	-0.969157	0.327265	0.000159221	0.00168738	Gm34574
ENSMUSG00000020432	988.148	-0.970759	0.16621	3.2981e-10	1.58337e-08	Tcn2
ENSMUSG00000078439	450.991	-0.972138	0.155923	3.70982e-11	2.10705e-09	Smim24
ENSMUSG00000051998	1118.93	-0.972508	0.136672	9.18731e-14	7.97583e-12	Lax1
ENSMUSG00000038375	165.997	-0.972824	0.334771	0.000224164	0.00224097	Trp53inp2
ENSMUSG00000048440	386.783	-0.972977	0.169419	7.35426e-10	3.3035e-08	Cyp4f16
ENSMUSG00000029314	3630.65	-0.975676	0.12148	9.96129e-17	1.30392e-14	Gpat3
ENSMUSG00000028378	5862.11	-0.977337	0.11922	2.25571e-17	3.28647e-15	Ptgr1
ENSMUSG00000036390	123.373	-0.983453	0.234885	2.03774e-06	4.06516e-05	Gadd45a
ENSMUSG00000041287	47.65	-0.987141	0.483204	0.00161224	0.0113167	Sox15
ENSMUSG00000079429	433.461	-0.987232	0.239625	2.08541e-06	4.13014e-05	Mroh2a
ENSMUSG00000052369	1828.48	-0.987968	0.103256	9.68684e-23	2.53598e-20	Tmem106c
ENSMUSG00000027478	1160.9	-0.990282	0.165188	1.62543e-10	8.17843e-09	Dnmt3b
ENSMUSG00000026311	289.893	-0.99348	0.261674	9.30194e-06	0.000150729	Asb1
ENSMUSG00000038894	405.413	-0.994979	0.178764	1.71373e-09	7.08976e-08	Irs2
ENSMUSG00000025324	1470.94	-0.997417	0.209182	1.3663e-07	3.69368e-06	Atp10a
ENSMUSG00000062646	403.913	-0.999111	0.182912	3.64011e-09	1.42168e-07	Ganc
ENSMUSG00000037683	132.375	-1.00024	0.218393	3.33173e-07	8.19722e-06	Armc3
ENSMUSG00000042613	2022.01	-1.00322	0.181966	2.52481e-09	1.01936e-07	Pbxip1
ENSMUSG00000030677	17265.4	-1.00384	0.0873019	1.08867e-31	4.56016e-29	Kif22
ENSMUSG00000020423	3189.21	-1.00402	0.153185	3.97618e-12	2.71922e-10	Btg2
ENSMUSG00000036356	1307.01	-1.00589	0.176031	8.24102e-10	3.65286e-08	Csgalnact1
ENSMUSG00000024055	247.243	-1.01063	0.224905	5.03361e-07	1.17462e-05	Cyp4f13
ENSMUSG00000020437	3687.25	-1.01173	0.119164	1.7235e-18	2.75021e-16	Myo1g
ENSMUSG00000021123	1133.48	-1.01473	0.126823	9.14189e-17	1.20608e-14	Rdh12
ENSMUSG00000030122	55.7661	-1.0159	0.27145	1.29559e-05	0.000200811	Ptms
ENSMUSG00000060441	322.563	-1.01663	0.225641	4.72267e-07	1.11292e-05	Trim5
ENSMUSG00000036944	781.242	-1.01981	0.180887	1.35178e-09	5.7485e-08	Tmem71
ENSMUSG00000101316	72.7892	-1.01988	0.252862	3.76681e-06	6.90008e-05	Gm12663
ENSMUSG00000030934	10026.5	-1.02064	0.0828791	6.76436e-36	3.14825e-33	Oat
ENSMUSG00000038421	529.012	-1.02485	0.259916	5.46779e-06	9.53307e-05	Fcrla
ENSMUSG00000028270	1124.2	-1.02792	0.141478	2.33925e-14	2.18962e-12	Gbp2
ENSMUSG00000032298	1445.07	-1.02894	0.152605	1.02837e-12	7.62407e-11	Neil1
ENSMUSG00000021238	431.215	-1.03496	0.231632	5.56049e-07	1.278e-05	Aldh6a1
ENSMUSG00000033488	301.702	-1.03524	0.223229	2.39361e-07	6.17049e-06	Cryzl2
ENSMUSG00000022429	86.9187	-1.03704	0.338748	0.000111572	0.001258	Dmc1
ENSMUSG00000046402	295.895	-1.04038	0.185808	1.45686e-09	6.13309e-08	Rbp1
ENSMUSG00000022309	151.004	-1.04311	0.46412	0.0011421	0.00856576	Angpt1
ENSMUSG00000019122	72.8267	-1.04726	0.590986	0.00278517	0.017623	Ccl9
ENSMUSG00000017756	1846.18	-1.04896	0.157458	1.94608e-12	1.38751e-10	Slc12a7
ENSMUSG00000020888	1592.07	-1.05049	0.121945	4.61796e-19	7.97669e-17	Dvl2
ENSMUSG00000105149	61.1213	-1.05189	0.316232	5.36986e-05	0.000678522	Gm42983
ENSMUSG00000020143	5612.1	-1.05688	0.16668	1.58547e-11	9.8387e-10	Dock2
ENSMUSG00000037922	371.282	-1.05804	0.161868	4.73273e-12	3.18461e-10	Bank1
ENSMUSG00000032558	180.922	-1.05845	0.336561	9.44597e-05	0.00110137	Nphp3
ENSMUSG00000063450	616.437	-1.06092	0.178381	1.90922e-10	9.52053e-09	Syne2
ENSMUSG00000062939	1131.04	-1.06346	0.1007	3.66238e-27	1.1578e-24	Stat4
ENSMUSG00000029084	819.287	-1.06366	0.212505	3.88636e-08	1.19552e-06	Cd38
ENSMUSG00000048924	945.201	-1.07457	0.153932	2.0797e-13	1.7336e-11	Ccdc125
ENSMUSG00000037972	3770.59	-1.07577	0.124225	5.66832e-19	9.6911e-17	Snn
ENSMUSG00000021703	1496.79	-1.07914	0.206455	1.21926e-08	4.30987e-07	Serinc5
ENSMUSG00000028678	6639.4	-1.07949	0.0845897	2.02261e-38	1.05903e-35	Kif2c
ENSMUSG00000062031	1200.99	-1.07975	0.115168	5.14763e-22	1.1979e-19	Pgghg
ENSMUSG00000110773	21.4202	-1.08097	0.598014	0.00268293	0.0171423	AC061963.1
ENSMUSG00000022246	376.099	-1.09113	0.266041	2.02278e-06	4.04918e-05	Rai14
ENSMUSG00000057897	550.942	-1.09178	0.29103	1.00256e-05	0.000160746	Camk2b
ENSMUSG00000037032	594.799	-1.09318	0.22129	5.16584e-08	1.54513e-06	Apbb1
ENSMUSG00000086938	147.726	-1.09343	0.272526	3.80753e-06	6.95694e-05	4930481A15Rik
ENSMUSG00000016494	154.224	-1.09728	0.496283	0.00117291	0.00876932	Cd34
ENSMUSG00000032053	16889.2	-1.09841	0.0800916	8.37717e-44	4.83998e-41	Pou2af1
ENSMUSG00000040714	38.1171	-1.09982	0.41682	0.000404078	0.00367353	Klc3
ENSMUSG00000020034	1562.09	-1.10047	0.165575	2.21927e-12	1.5682e-10	Tcp11l2
ENSMUSG00000055116	15449.4	-1.10347	0.143985	7.16816e-16	8.51791e-14	Arntl
ENSMUSG00000023963	188.217	-1.10398	0.253745	8.79946e-07	1.92725e-05	Cyp39a1
ENSMUSG00000028573	194.957	-1.10487	0.253311	8.03719e-07	1.78362e-05	Fggy
ENSMUSG00000022824	341.52	-1.10591	0.213137	1.4059e-08	4.91773e-07	Muc13
ENSMUSG00000027474	167.063	-1.10642	0.270694	2.79194e-06	5.33917e-05	Ccm2l
ENSMUSG00000116409	710.478	-1.10764	0.176364	2.09922e-11	1.2652e-09	AL611986.1
ENSMUSG00000101223	83.5627	-1.10821	0.236107	1.82626e-07	4.83395e-06	4930568A12Rik
ENSMUSG00000059883	431.355	-1.11221	0.168409	2.89278e-12	2.02732e-10	Irak4
ENSMUSG00000090386	48.7804	-1.1164	0.462808	0.000692124	0.00575796	Mir99ahg
ENSMUSG00000019872	824.106	-1.11733	0.172584	6.85813e-12	4.5207e-10	Smpdl3a
ENSMUSG00000028860	370.045	-1.11849	0.2361	1.329e-07	3.61097e-06	Sytl1
ENSMUSG00000079363	384.359	-1.11852	0.223725	3.72717e-08	1.16076e-06	Gbp4
ENSMUSG00000028517	472.456	-1.12351	0.150825	6.88428e-15	7.12013e-13	Plpp3
ENSMUSG00000031766	679.519	-1.13038	0.257039	5.63643e-07	1.29014e-05	Slc12a3
ENSMUSG00000025357	2819.25	-1.13548	0.143329	1.59334e-16	1.99227e-14	Dgka
ENSMUSG00000029304	264.337	-1.1376	0.201958	1.17658e-09	5.08082e-08	Spp1
ENSMUSG00000008540	1306.68	-1.13848	0.167757	7.8955e-13	6.01314e-11	Mgst1
ENSMUSG00000087403	486.622	-1.13951	0.297277	7.47654e-06	0.000124895	Kantr
ENSMUSG00000028071	439.238	-1.13994	0.155929	2.06636e-14	1.95603e-12	Sh2d2a
ENSMUSG00000052914	311.885	-1.1429	0.210547	3.98388e-09	1.54514e-07	Cyp2j6
ENSMUSG00000039246	97.5865	-1.14471	0.450287	0.000526462	0.00457989	Lyplal1
ENSMUSG00000037234	792.907	-1.14646	0.161113	7.8003e-14	6.80698e-12	Hook3
ENSMUSG00000025747	12754.4	-1.14898	0.0766316	7.35973e-52	5.13801e-49	Tyms
ENSMUSG00000045679	3823.49	-1.14975	0.156019	1.39566e-14	1.37554e-12	Pqlc3
ENSMUSG00000043448	95.3097	-1.15259	0.364191	8.46124e-05	0.00100545	Gjc2
ENSMUSG00000037860	695.611	-1.15382	0.156924	1.01376e-14	1.02943e-12	Aim2
ENSMUSG00000097779	660.738	-1.16205	0.115383	5.55169e-25	1.63191e-22	4833407H14Rik
ENSMUSG00000000958	368.275	-1.16876	0.220822	7.82935e-09	2.88944e-07	Slc7a7
ENSMUSG00000064373	4455.91	-1.17088	0.139611	3.23352e-18	5.06333e-16	Selenop
ENSMUSG00000039264	474.816	-1.17506	0.210293	1.43118e-09	6.04689e-08	Gimap3
ENSMUSG00000094377	17.681	-1.18526	0.670861	0.00264334	0.016956	Gm24407
ENSMUSG00000058126	1757.88	-1.19019	0.0906564	1.63461e-40	8.83481e-38	Tpm3-rs7
ENSMUSG00000058099	638.398	-1.1917	0.154142	7.22275e-16	8.52233e-14	Nfam1
ENSMUSG00000019312	990.495	-1.19754	0.499026	0.000604704	0.00514567	Grb7
ENSMUSG00000039109	1318.97	-1.19793	0.213341	1.18783e-09	5.11624e-08	F13a1
ENSMUSG00000034401	3322.06	-1.20707	0.111264	6.46756e-29	2.21151e-26	Spata6
ENSMUSG00000029798	462.29	-1.2088	0.206671	3.18658e-10	1.53865e-08	Herc6
ENSMUSG00000042675	3816.77	-1.20973	0.160096	2.41766e-15	2.67606e-13	Ypel3
ENSMUSG00000116987	36.8243	-1.21066	0.401605	0.000121596	0.00134478	AC150035.3
ENSMUSG00000034035	134.137	-1.21148	0.248737	6.78882e-08	1.97135e-06	Ccdc17
ENSMUSG00000104501	125.86	-1.21586	0.398278	0.000108721	0.00123333	Gm37736
ENSMUSG00000003484	951.3	-1.21633	0.223221	3.33596e-09	1.31207e-07	Cyp4f18
ENSMUSG00000028214	378.946	-1.22028	0.17671	3.27549e-13	2.65125e-11	Gem
ENSMUSG00000110279	75.8758	-1.22189	0.290305	1.49962e-06	3.11352e-05	Gm45552
ENSMUSG00000016194	265.564	-1.22284	0.264549	2.03664e-07	5.32353e-06	Hsd11b1
ENSMUSG00000033255	134.733	-1.23201	0.255664	9.09764e-08	2.55902e-06	Gm5134
ENSMUSG00000026090	568.223	-1.23493	0.268859	2.48152e-07	6.38677e-06	2010300C02Rik
ENSMUSG00000004631	285.527	-1.24304	0.221921	1.31063e-09	5.60193e-08	Sgce
ENSMUSG00000022179	278.076	-1.24603	0.165799	3.70538e-15	4.0054e-13	4931414P19Rik
ENSMUSG00000026672	225.553	-1.24878	0.271748	2.55948e-07	6.54719e-06	Optn
ENSMUSG00000041231	837.793	-1.25072	0.166136	3.23582e-15	3.52053e-13	Ublcp1
ENSMUSG00000004552	786.455	-1.25343	0.156858	7.75428e-17	1.05628e-14	Ctse
ENSMUSG00000075702	378.033	-1.261	0.186791	9.08493e-13	6.82592e-11	Selenom
ENSMUSG00000021567	1008.23	-1.26471	0.172786	1.46624e-14	1.42005e-12	Nkd2
ENSMUSG00000022708	290.518	-1.26531	0.20558	4.34567e-11	2.44334e-09	Zbtb20
ENSMUSG00000030579	124.082	-1.26588	0.546253	0.000785203	0.00633417	Tyrobp
ENSMUSG00000028419	1725.03	-1.26663	0.136885	1.2467e-21	2.78512e-19	Chmp5
ENSMUSG00000021596	947.223	-1.2718	0.147356	3.34357e-19	5.897e-17	Mctp1
ENSMUSG00000039167	832.296	-1.27599	0.140478	6.48821e-21	1.30976e-18	Adgrl4
ENSMUSG00000056220	781.651	-1.27859	0.150976	1.68588e-18	2.74241e-16	Pla2g4a
ENSMUSG00000073791	234.237	-1.2791	0.219706	3.74265e-10	1.77643e-08	Efcab7
ENSMUSG00000020788	11141.7	-1.28024	0.16213	1.55194e-16	1.95509e-14	Atp2a3
ENSMUSG00000112063	422.807	-1.28067	0.171646	5.56446e-15	5.79084e-13	Gm32220
ENSMUSG00000030325	104.526	-1.2833	0.339819	7.79591e-06	0.000129327	Klrb1c
ENSMUSG00000030772	193.153	-1.29402	0.335951	6.1924e-06	0.000105979	Dkk3
ENSMUSG00000043773	2153.82	-1.30165	0.132009	4.21097e-24	1.17591e-21	1700048O20Rik
ENSMUSG00000042216	247.011	-1.31489	0.25646	1.54499e-08	5.35947e-07	Sgsm1
ENSMUSG00000103168	1379.03	-1.31598	0.173918	2.4277e-15	2.67606e-13	Gm30948
ENSMUSG00000039934	436.643	-1.32355	0.197003	1.00293e-12	7.5018e-11	Gsap
ENSMUSG00000086862	29.2987	-1.33833	0.713674	0.00182866	0.012588	Gm13546
ENSMUSG00000112082	456.305	-1.34563	0.145837	1.75789e-21	3.87545e-19	Gm35035
ENSMUSG00000029923	253.448	-1.35309	0.157865	6.27153e-19	1.06141e-16	Rab19
ENSMUSG00000023008	1215.52	-1.35533	0.167892	4.21893e-17	5.89068e-15	Fmnl3
ENSMUSG00000096243	21.7918	-1.36764	0.520984	0.000371899	0.00341996	Gm24265
ENSMUSG00000096981	16.2307	-1.38318	0.595578	0.000758033	0.00616696	Gm16845
ENSMUSG00000039298	1471.74	-1.38728	0.128443	2.49863e-28	8.20873e-26	Cdk5rap2
ENSMUSG00000092274	136.589	-1.38794	0.264827	8.74019e-09	3.17661e-07	Neat1
ENSMUSG00000019970	3553.33	-1.39238	0.164141	1.41968e-18	2.33203e-16	Sgk1
ENSMUSG00000042073	55.8648	-1.39752	0.35035	3.6569e-06	6.72572e-05	Abhd14b
ENSMUSG00000074794	1116	-1.40058	0.169915	9.8737e-18	1.4904e-15	Arrdc3
ENSMUSG00000107061	237.538	-1.40066	0.221914	1.58536e-11	9.8387e-10	Gm19590
ENSMUSG00000011632	17.7814	-1.40883	0.926833	0.00320645	0.0197879	Pinlyp
ENSMUSG00000104413	903.936	-1.41619	0.125043	6.8063e-31	2.65208e-28	Gm37065
ENSMUSG00000002409	201.416	-1.4172	0.263618	4.35606e-09	1.67783e-07	Dyrk1b
ENSMUSG00000066892	1195.55	-1.42475	0.173872	1.5579e-17	2.28971e-15	Fbxl12
ENSMUSG00000041189	120.034	-1.42573	0.485386	0.000139478	0.00151161	Chrnb1
ENSMUSG00000027514	246.308	-1.4332	0.233259	4.81096e-11	2.68692e-09	Zbp1
ENSMUSG00000046480	1134.56	-1.43427	0.223886	8.81023e-12	5.67751e-10	Scn4b
ENSMUSG00000022475	4066.12	-1.45355	0.134205	1.01956e-28	3.41654e-26	Hdac7
ENSMUSG00000029456	152.617	-1.45884	0.453093	5.73829e-05	0.000718036	Acad10
ENSMUSG00000002699	355.769	-1.46019	0.263554	1.68246e-09	6.99494e-08	Lcp2
ENSMUSG00000032058	4272.66	-1.46731	0.0862471	4.58356e-66	5.48554e-63	Ppp2r1b
ENSMUSG00000029299	328.814	-1.47465	0.227884	6.35438e-12	4.22491e-10	Abcg3
ENSMUSG00000027550	1936.18	-1.4831	0.163915	8.54983e-21	1.66573e-18	Lrrcc1
ENSMUSG00000053965	230.419	-1.48747	0.279052	5.14823e-09	1.94276e-07	Pde5a
ENSMUSG00000038418	436.69	-1.4951	0.197523	2.16251e-15	2.41552e-13	Egr1
ENSMUSG00000003379	38082.3	-1.5035	0.0768602	1.75467e-86	3.67493e-83	Cd79a
ENSMUSG00000027330	7150.62	-1.50829	0.152483	2.34554e-24	6.66093e-22	Cdc25b
ENSMUSG00000027360	102.208	-1.51165	0.573854	0.00029972	0.00286143	Hdc
ENSMUSG00000030742	669.352	-1.54028	0.14011	2.3004e-29	8.20068e-27	Lat
ENSMUSG00000085110	128.254	-1.54209	0.241659	9.89402e-12	6.32726e-10	Gm13920
ENSMUSG00000045667	3213.81	-1.55601	0.225179	2.21521e-13	1.83741e-11	Smtnl2
ENSMUSG00000015702	44.8918	-1.56273	0.465896	3.14251e-05	0.000429406	Anxa9
ENSMUSG00000000058	1051.34	-1.5648	0.221738	9.65956e-14	8.34258e-12	Cav2
ENSMUSG00000054808	17808.7	-1.56526	0.0441713	1.50898e-276	2.52829e-272	Actn4
ENSMUSG00000030533	1424.08	-1.5746	0.109174	2.3407e-48	1.56874e-45	Unc45a
ENSMUSG00000041135	473.443	-1.57806	0.173804	6.3181e-21	1.29097e-18	Ripk2
ENSMUSG00000084993	32.0155	-1.58123	0.453299	2.20453e-05	0.000317747	Gm12305
ENSMUSG00000026358	31.5836	-1.59	0.591205	0.000294555	0.00281373	Rgs1
ENSMUSG00000086763	139.229	-1.61448	0.309986	1.04542e-08	3.72681e-07	Plxna4os1
ENSMUSG00000032359	100.93	-1.61736	0.527627	8.87917e-05	0.00104474	Ctsh
ENSMUSG00000021200	228.183	-1.6207	0.207264	3.24305e-16	3.90915e-14	Asb2
ENSMUSG00000025656	159.427	-1.62405	0.283245	5.30424e-10	2.46184e-08	Arhgef9
ENSMUSG00000032554	27.6946	-1.63181	0.497046	4.12716e-05	0.000540959	Trf
ENSMUSG00000027007	315.449	-1.64383	0.174677	2.94257e-22	6.94405e-20	Ssfa2
ENSMUSG00000017453	64.0792	-1.65372	0.556632	0.00011743	0.00130763	Pipox
ENSMUSG00000041119	262.347	-1.66427	0.338667	3.87646e-08	1.19552e-06	Pde9a
ENSMUSG00000037202	63.0678	-1.68074	0.530528	4.87337e-05	0.000624261	Prf1
ENSMUSG00000084992	27.6217	-1.68696	0.54257	8.01982e-05	0.000964624	Gm13842
ENSMUSG00000025538	524.378	-1.71472	0.143632	4.60512e-34	2.08537e-31	Sumf2
ENSMUSG00000047880	88.0717	-1.74478	0.488342	9.2465e-06	0.000149976	Cxcr5
ENSMUSG00000079339	368.165	-1.7459	0.230695	1.75252e-15	1.99752e-13	Ifit1bl1
ENSMUSG00000026546	63.7329	-1.74859	0.46114	4.38351e-06	7.88891e-05	Cfap45
ENSMUSG00000026222	2922.29	-1.75899	0.107721	7.80704e-61	7.26705e-58	Sp100
ENSMUSG00000005883	190.399	-1.76248	0.346295	1.7278e-08	5.9444e-07	Spo11
ENSMUSG00000026255	286.129	-1.78438	0.261543	4.2656e-13	3.40334e-11	Efhd1
ENSMUSG00000020101	97.8058	-1.78441	0.629499	0.000151655	0.00161743	Vsir
ENSMUSG00000037366	79.4971	-1.79832	0.450834	2.85105e-06	5.41603e-05	Pafah2
ENSMUSG00000032375	122.32	-1.83566	0.449952	1.80195e-06	3.66914e-05	Aph1b
ENSMUSG00000044037	183.427	-1.83765	0.367074	1.81664e-08	6.18654e-07	Als2cl
ENSMUSG00000024810	125.597	-1.84596	0.380699	5.69388e-08	1.68553e-06	Il33
ENSMUSG00000102154	41.7034	-1.85481	0.503041	1.0109e-05	0.000161618	Gm37469
ENSMUSG00000048174	60.4641	-1.87676	0.509492	9.13286e-06	0.00014842	Tmem81
ENSMUSG00000067567	1106.6	-1.88039	0.111457	4.31301e-65	4.81763e-62	Hdac8
ENSMUSG00000052572	1760.86	-1.89085	0.131426	3.51569e-48	2.26559e-45	Dlg2
ENSMUSG00000028344	195.221	-1.8963	0.335398	7.43567e-10	3.33114e-08	Invs
ENSMUSG00000029298	741.018	-1.90462	0.207108	2.04296e-21	4.44543e-19	Gbp9
ENSMUSG00000048215	292.836	-1.91812	0.314828	5.61155e-11	3.10302e-09	A630023P12Rik
ENSMUSG00000061859	665.236	-1.91885	0.163152	3.29564e-33	1.41586e-30	Patj
ENSMUSG00000028923	2595.52	-1.92708	0.0989418	9.80969e-86	1.82624e-82	Necap2
ENSMUSG00000058470	123.907	-1.93534	0.291618	1.40147e-12	1.01652e-10	Gm8369
ENSMUSG00000020272	3814.26	-1.98818	0.119502	1.9516e-63	2.04369e-60	Stk10
ENSMUSG00000019832	549.548	-1.99109	0.210926	1.38072e-22	3.50514e-20	Rab32
ENSMUSG00000029484	115.198	-1.99314	0.647823	6.48369e-05	0.000797023	Anxa3
ENSMUSG00000026748	181.166	-1.99917	0.468276	6.92328e-07	1.55495e-05	Plxdc2
ENSMUSG00000030786	88.5343	-2.03022	0.47284	7.28113e-07	1.63029e-05	Itgam
ENSMUSG00000002227	1341.24	-2.03381	0.111583	2.07617e-75	2.89885e-72	Mov10
ENSMUSG00000038370	770.95	-2.05581	0.407776	2.1449e-08	7.13052e-07	Pcp4l1
ENSMUSG00000066705	1378.79	-2.11806	0.179311	1.66559e-33	7.34395e-31	Fxyd6
ENSMUSG00000025188	988.075	-2.12847	0.120721	8.78071e-71	1.1317e-67	Hps1
ENSMUSG00000056418	211.162	-2.15736	0.626051	1.52576e-05	0.00023177	BC043934
ENSMUSG00000006498	8108.6	-2.22478	0.065738	2.51892e-252	2.11023e-248	Ptbp1
ENSMUSG00000022584	558.313	-2.27405	0.737074	6.26602e-05	0.000771964	Ly6c2
ENSMUSG00000040554	51.0031	-2.31634	0.494538	1.0537e-07	2.92297e-06	Aipl1
ENSMUSG00000027699	9900.43	-2.32087	0.121588	1.20103e-82	1.82939e-79	Ect2
ENSMUSG00000061665	697.05	-2.32467	0.145762	1.66244e-58	1.46601e-55	Cd2ap
ENSMUSG00000041187	4971.39	-2.37642	0.0754368	2.68026e-218	1.49692e-214	Prkd2
ENSMUSG00000020053	61.5336	-2.38429	0.462112	8.82432e-09	3.1939e-07	Igf1
ENSMUSG00000002500	165.62	-2.41611	0.34058	2.2106e-14	2.08082e-12	Rpl3l
ENSMUSG00000079853	61.2232	-2.47152	0.421615	1.82266e-10	9.1433e-09	Klra1
ENSMUSG00000116762	143.074	-2.51551	0.402295	1.70139e-11	1.04421e-09	AC161376.1
ENSMUSG00000020335	62.9003	-2.5216	0.723745	5.264e-06	9.23543e-05	Zfp354b
ENSMUSG00000040387	64.5238	-2.52193	0.532964	9.65887e-08	2.70174e-06	Klhl32
ENSMUSG00000035000	9149.18	-2.62203	0.117063	2.76148e-112	7.71144e-109	Dpp4
ENSMUSG00000021408	1411.37	-2.62979	0.171591	2.36748e-54	1.88891e-51	Ripk1
ENSMUSG00000103659	38.8115	-2.64025	1.01351	2.54624e-05	0.000360128	Gm32569
ENSMUSG00000041911	64.774	-2.65627	0.461471	3.99115e-10	1.8786e-08	Dlx1
ENSMUSG00000068758	117.875	-2.65989	0.318293	1.81493e-18	2.86878e-16	Il3ra
ENSMUSG00000032363	68.8206	-2.67352	0.522092	1.43359e-08	5.00411e-07	Adamts7
ENSMUSG00000012428	651.406	-2.69109	0.405215	1.06966e-12	7.89525e-11	Steap4
ENSMUSG00000000881	319.691	-2.73998	0.346818	1.12505e-16	1.46125e-14	Dlg3
ENSMUSG00000031722	101.214	-2.76832	1.0396	0.000186935	0.00192271	Hp
ENSMUSG00000070504	386.867	-2.8305	0.311256	2.83328e-21	6.00907e-19	Fcrl6
ENSMUSG00000059027	74.2711	-2.84221	0.395311	3.51287e-14	3.2163e-12	9630013D21Rik
ENSMUSG00000017002	54.1617	-2.85973	0.717429	1.40729e-06	2.9474e-05	Slpi
ENSMUSG00000016262	206.773	-2.92333	0.435499	4.2406e-13	3.39959e-11	Sertad4
ENSMUSG00000054641	3371.21	-2.95657	0.189561	2.47492e-56	2.07337e-53	Mmrn1
ENSMUSG00000017897	295.369	-2.99539	0.265237	7.32796e-31	2.79045e-28	Eya2
ENSMUSG00000097595	26.1916	-3.04537	0.557047	2.04338e-09	8.39139e-08	1500002F19Rik
ENSMUSG00000025877	133.26	-3.07833	0.887725	1.37209e-05	0.000211299	Hk3
ENSMUSG00000031328	3451.98	-3.13451	0.309423	1.49252e-25	4.46556e-23	Flna
ENSMUSG00000030536	6741.98	-3.14212	0.163312	6.5115e-84	1.091e-80	Iqgap1
ENSMUSG00000039774	1397.5	-3.14961	0.128508	4.43094e-134	1.85601e-130	Galnt12
ENSMUSG00000108722	201.603	-3.17125	0.251154	5.18349e-38	2.6318e-35	Gm34225
ENSMUSG00000069805	263.678	-3.20948	0.212714	9.69249e-53	7.06077e-50	Fbp1
ENSMUSG00000029171	1189.59	-3.23134	0.141979	2.81948e-116	9.44808e-113	Pgm1
ENSMUSG00000040314	572.608	-3.26519	0.801541	8.71322e-07	1.91588e-05	Ctsg
ENSMUSG00000032744	651.744	-3.27141	0.454941	1.71881e-14	1.65509e-12	Heyl
ENSMUSG00000059498	119.439	-3.28	0.971735	2.02072e-05	0.000294666	Fcgr3
ENSMUSG00000031712	89.0219	-3.53476	0.571165	2.55933e-11	1.51525e-09	Il15
ENSMUSG00000057729	438.479	-3.54306	0.755786	4.16663e-08	1.27162e-06	Prtn3
ENSMUSG00000009350	3741.07	-3.69781	0.794397	4.29447e-08	1.30115e-06	Mpo
ENSMUSG00000055421	83.1995	-3.7949	0.664067	1.0984e-10	5.64529e-09	Pcdh9
ENSMUSG00000020125	1545.93	-3.94895	0.763762	5.25939e-09	1.97581e-07	Elane
ENSMUSG00000024681	240.181	-4.23658	0.856552	1.98284e-08	6.6445e-07	Ms4a3

## Sheet: Fig4a P1P2dKOvs sKO sig|FC|>0.5
EnsemblGeneID	baseMean	log2FoldChange	lfcSE	pvalue	padj	GeneName
ENSMUSG00000067017	8189.35	3.69414	0.11777	1.0227e-217	1.5315e-213	Gm3608
ENSMUSG00000052305	35.6474	3.47956	0.888504	3.28724e-06	5.38582e-05	Hbb-bs
ENSMUSG00000112969	36.5294	3.06645	0.478102	7.93027e-12	7.02697e-10	Gm48496
ENSMUSG00000076749	363.76	3.02316	0.480725	2.16884e-11	1.67414e-09	Tcrg-C1
ENSMUSG00000066000	136.502	2.69879	0.956561	0.000138038	0.00126662	Zfp979
ENSMUSG00000056481	63.6236	2.68655	0.420144	8.13667e-12	7.16745e-10	Cd248
ENSMUSG00000024610	3036.82	2.53991	0.296706	5.7794e-19	1.49218e-16	Cd74
ENSMUSG00000060586	474.015	2.48133	0.28119	5.90605e-20	1.76886e-17	H2-Eb1
ENSMUSG00000024065	343.319	2.34631	0.295961	5.27574e-17	1.01287e-14	Ehd3
ENSMUSG00000036594	1351.29	2.34339	0.244744	5.52666e-23	2.43417e-20	H2-Aa
ENSMUSG00000087452	34.1127	2.32741	0.434427	3.89078e-09	1.6647e-07	Gm11998
ENSMUSG00000026405	51.3709	2.28178	0.421026	2.39981e-09	1.11371e-07	C4bp
ENSMUSG00000069919	31.8539	2.05749	0.991259	0.00088381	0.00595101	Hba-a1
ENSMUSG00000073433	80.6433	1.9158	0.341135	9.51637e-10	4.93106e-08	Arhgdig
ENSMUSG00000037548	402.926	1.89174	0.223173	1.24278e-18	3.05093e-16	H2-DMb2
ENSMUSG00000040957	117.587	1.85663	0.40423	1.85303e-07	4.53417e-06	Cables1
ENSMUSG00000029096	1131	1.70397	0.216365	1.31063e-16	2.33652e-14	Htra3
ENSMUSG00000025491	368.89	1.68144	0.262738	8.53261e-12	7.42883e-10	Ifitm1
ENSMUSG00000030577	1099.21	1.66065	0.220348	2.72584e-15	4.20818e-13	Cd22
ENSMUSG00000049551	520.719	1.59872	0.171209	4.8061e-22	1.87943e-19	Fzd9
ENSMUSG00000021680	627.861	1.58114	0.167685	1.533e-22	6.55906e-20	Crhbp
ENSMUSG00000054426	457.932	1.57558	0.137291	8.29359e-32	7.30568e-29	A930005H10Rik
ENSMUSG00000089889	151.73	1.56437	0.197347	1.33827e-16	2.35771e-14	0610040B10Rik
ENSMUSG00000041481	148.405	1.48502	0.409964	1.04598e-05	0.000143047	Serpina3g
ENSMUSG00000042684	492.39	1.4754	0.200239	9.39176e-15	1.37961e-12	Npl
ENSMUSG00000026815	772.647	1.4716	0.169883	2.77362e-19	7.69166e-17	Gfi1b
ENSMUSG00000024538	578.008	1.45097	0.145168	7.88727e-25	4.07282e-22	Ppic
ENSMUSG00000022504	129.197	1.44232	0.389688	9.16782e-06	0.000128307	Ciita
ENSMUSG00000022844	302.562	1.43835	0.233409	4.14004e-11	3.03907e-09	Pdia5
ENSMUSG00000040339	706.732	1.41883	0.272933	1.02171e-08	3.84426e-07	Fam102b
ENSMUSG00000029153	133.203	1.40943	0.28131	2.95924e-08	9.23223e-07	Ociad2
ENSMUSG00000050545	17.9289	1.39129	0.581371	0.000657374	0.00463692	Fam228b
ENSMUSG00000039891	106.83	1.38878	0.360595	5.05106e-06	7.76588e-05	Txlnb
ENSMUSG00000075602	3149.69	1.37024	0.151323	8.37227e-21	2.66755e-18	Ly6a
ENSMUSG00000025810	150.215	1.36538	0.478387	0.0001696	0.00151627	Nrp1
ENSMUSG00000020027	4694.33	1.36193	0.12774	6.57446e-28	4.28054e-25	Socs2
ENSMUSG00000003355	229.477	1.35761	0.218737	3.05015e-11	2.30687e-09	Fkbp11
ENSMUSG00000050022	82.6445	1.34997	0.472465	0.000171745	0.00153179	Amz1
ENSMUSG00000036111	127.102	1.3448	0.200899	1.37852e-12	1.41094e-10	Lmo1
ENSMUSG00000105296	34.4786	1.34143	0.630055	0.00113407	0.00728249	Gm19708
ENSMUSG00000086205	23.216	1.30894	0.534425	0.000579757	0.00417598	Gm12679
ENSMUSG00000018168	384.723	1.30098	0.51506	0.000451622	0.00341011	Ikzf3
ENSMUSG00000028655	80.3116	1.2869	0.380079	3.21538e-05	0.000370672	Mfsd2a
ENSMUSG00000031880	69.7261	1.28477	0.296691	8.42635e-07	1.66911e-05	Rrad
ENSMUSG00000028121	587.59	1.263	0.183466	2.86279e-13	3.29771e-11	Bcar3
ENSMUSG00000062309	34.4369	1.2618	0.392761	6.51293e-05	0.000678714	Rpp25
ENSMUSG00000068417	981.207	1.25994	0.143942	1.30525e-19	3.75887e-17	Pnp2
ENSMUSG00000035983	48.4799	1.22118	0.346565	2.23202e-05	0.000271965	Gm7008
ENSMUSG00000075269	635.512	1.21892	0.196749	3.61727e-11	2.69495e-09	Bex6
ENSMUSG00000018509	247.194	1.20557	0.20578	2.99693e-10	1.78801e-08	Cenpv
ENSMUSG00000050271	234.888	1.2006	0.340117	1.89329e-05	0.000237653	Prag1
ENSMUSG00000054517	800.416	1.19953	0.175975	5.69606e-13	6.36556e-11	Trim65
ENSMUSG00000095419	24.9428	1.18792	0.555653	0.00107918	0.00698991	Gm14328
ENSMUSG00000061086	2255.05	1.1857	0.18347	6.60296e-12	5.92092e-10	Myl4
ENSMUSG00000087547	22.9408	1.15864	0.529097	0.00114255	0.00732751	Platr27
ENSMUSG00000020712	439.764	1.15729	0.194558	1.77893e-10	1.12434e-08	Tcam1
ENSMUSG00000041408	1330.16	1.15476	0.245584	1.51143e-07	3.7976e-06	Wapl
ENSMUSG00000029752	640.493	1.09299	0.196969	1.9744e-09	9.38623e-08	Asns
ENSMUSG00000037216	131.671	1.09136	0.232275	1.41224e-07	3.57235e-06	Lipt1
ENSMUSG00000114241	19.7752	1.08591	0.570422	0.00216237	0.012303	Gm30108
ENSMUSG00000046223	60.0535	1.07082	0.466947	0.000963003	0.00636819	Plaur
ENSMUSG00000027805	262.236	1.03893	0.265493	5.73421e-06	8.6475e-05	Pfn2
ENSMUSG00000027533	2476.56	1.03783	0.13107	1.89922e-16	3.30707e-14	Fabp5
ENSMUSG00000004032	143.887	1.03439	0.180068	5.0486e-10	2.8001e-08	Gstm5
ENSMUSG00000028541	49.7051	1.02924	0.454566	0.00101299	0.00664165	B4galt2
ENSMUSG00000026893	141.057	1.02727	0.2466	1.88873e-06	3.3631e-05	Gca
ENSMUSG00000068129	716.309	1.02573	0.203887	3.42671e-08	1.0537e-06	Cst7
ENSMUSG00000044949	169.884	1.01526	0.208709	7.97432e-08	2.17515e-06	Ubtd2
ENSMUSG00000032936	839.156	1.00643	0.140261	4.77916e-14	6.33344e-12	Camkv
ENSMUSG00000019945	100.895	1.00552	0.351109	0.000227914	0.00194363	Cabcoco1
ENSMUSG00000028464	147.87	1.00358	0.224474	5.27893e-07	1.11813e-05	Tpm2
ENSMUSG00000000184	8472.02	1.00305	0.0999861	9.12858e-25	4.55668e-22	Ccnd2
ENSMUSG00000044734	7897.26	1.00038	0.11575	4.3828e-19	1.15145e-16	Serpinb1a
ENSMUSG00000024143	709.706	0.993899	0.265719	1.18961e-05	0.000159484	Rhoq
ENSMUSG00000031078	108.847	0.991877	0.310528	8.39729e-05	0.00084339	Cttn
ENSMUSG00000046058	225.231	0.990131	0.180938	3.22505e-09	1.43309e-07	Eid2
ENSMUSG00000072381	66.4922	0.971719	0.251311	7.46689e-06	0.00010762	Gm10355
ENSMUSG00000042215	1630.62	0.970054	0.0949573	1.31127e-25	7.27271e-23	Bag2
ENSMUSG00000027559	484.909	0.969936	0.113699	1.22208e-18	3.05011e-16	Car3
ENSMUSG00000025732	508.94	0.967321	0.171524	1.22364e-09	6.14899e-08	Mcrip2
ENSMUSG00000022793	925.209	0.96596	0.200833	1.11039e-07	2.89689e-06	B4galt4
ENSMUSG00000016756	622.034	0.964486	0.215772	5.36074e-07	1.12907e-05	Cmah
ENSMUSG00000063018	161.157	0.961458	0.193114	4.84927e-08	1.44369e-06	2010204K13Rik
ENSMUSG00000025780	642.755	0.958885	0.176372	4.11e-09	1.74355e-07	Itih5
ENSMUSG00000022415	43.823	0.957803	0.36839	0.000520458	0.00383367	Syngr1
ENSMUSG00000020191	59.0186	0.949203	0.584639	0.0037887	0.0194901	Spata48
ENSMUSG00000041774	676.455	0.931279	0.171598	4.54214e-09	1.89467e-07	Ydjc
ENSMUSG00000037907	213.882	0.927929	0.268	3.53657e-05	0.000403968	Ankrd13b
ENSMUSG00000005474	4595.47	0.923344	0.13487	6.1756e-13	6.85034e-11	Myl10
ENSMUSG00000020396	644.537	0.897453	0.198365	4.80096e-07	1.03445e-05	Nefh
ENSMUSG00000022015	435.068	0.896176	0.142233	2.51064e-11	1.91821e-09	Tnfsf11
ENSMUSG00000073676	5858.78	0.885827	0.136931	8.27776e-12	7.24909e-10	Hspe1
ENSMUSG00000025140	609.41	0.875601	0.204211	1.42175e-06	2.63172e-05	Pycr1
ENSMUSG00000111713	66.561	0.864979	0.260903	6.66292e-05	0.000692417	Gm20234
ENSMUSG00000004748	623.12	0.863693	0.150152	7.58897e-10	4.0443e-08	Mtfp1
ENSMUSG00000028982	276.777	0.858954	0.190812	5.54204e-07	1.16073e-05	Slc25a33
ENSMUSG00000015337	189.303	0.854022	0.242594	3.20447e-05	0.000369712	Endog
ENSMUSG00000039096	232.604	0.851658	0.180086	1.87457e-07	4.55709e-06	Rsad1
ENSMUSG00000035637	1701.72	0.844901	0.132786	1.71331e-11	1.3575e-09	Grhpr
ENSMUSG00000029602	754.022	0.843653	0.177923	1.81521e-07	4.4489e-06	Rasal1
ENSMUSG00000026189	525.303	0.839644	0.163411	2.43111e-08	7.84609e-07	Pecr
ENSMUSG00000057113	46438.3	0.838231	0.109085	1.43683e-15	2.28899e-13	Npm1
ENSMUSG00000056413	977.243	0.836541	0.217464	9.91776e-06	0.00013701	Adap1
ENSMUSG00000012519	895.175	0.828484	0.162287	2.95381e-08	9.23223e-07	Mlkl
ENSMUSG00000028207	870.734	0.826598	0.179502	3.53062e-07	7.95053e-06	Asph
ENSMUSG00000053070	114.079	0.826252	0.259993	0.000108493	0.0010428	9230110C19Rik
ENSMUSG00000054967	159.286	0.823316	0.204233	4.56479e-06	7.1206e-05	Zfp647
ENSMUSG00000097433	22.6165	0.823024	0.635764	0.00696103	0.0316075	Gm26781
ENSMUSG00000025856	14.6248	0.821951	0.870294	0.00839682	0.0366169	Pdgfa
ENSMUSG00000020648	676.149	0.81973	0.159545	2.48533e-08	7.96957e-07	Dus4l
ENSMUSG00000081603	668.202	0.813735	0.184158	8.23529e-07	1.64076e-05	Gm14681
ENSMUSG00000056091	495.061	0.810489	0.189559	1.64335e-06	2.97931e-05	St3gal5
ENSMUSG00000081400	37.1733	0.810287	0.391057	0.00219171	0.0124369	Gm13680
ENSMUSG00000037071	390.639	0.809282	0.222958	2.18215e-05	0.000266974	Scd1
ENSMUSG00000053168	67.0843	0.808264	0.38883	0.00218762	0.0124183	9030619P08Rik
ENSMUSG00000056999	21855	0.808245	0.123528	4.54917e-12	4.20518e-10	Ide
ENSMUSG00000039345	1036.18	0.804522	0.114784	2.30857e-13	2.81064e-11	Mettl22
ENSMUSG00000109771	189.356	0.803771	0.368758	0.00173838	0.0103139	Gm35315
ENSMUSG00000042210	1539.31	0.803587	0.153595	1.56469e-08	5.47459e-07	Abhd14a
ENSMUSG00000039963	184.817	0.802452	0.290485	0.000406704	0.00312008	Ccdc40
ENSMUSG00000057541	4556.29	0.800935	0.100112	1.1645e-16	2.1798e-14	Pus7
ENSMUSG00000003528	11508.4	0.79978	0.0921485	7.13781e-19	1.81167e-16	Slc25a1
ENSMUSG00000042097	590.65	0.797863	0.184364	1.33921e-06	2.5037e-05	Zfp239
ENSMUSG00000028544	58.7646	0.797437	0.552365	0.00570316	0.0269671	Slc5a9
ENSMUSG00000097769	712.906	0.793676	0.124597	1.87739e-11	1.46427e-09	Snhg4
ENSMUSG00000031562	1173.68	0.791504	0.133456	2.9803e-10	1.7852e-08	Dctd
ENSMUSG00000006800	717.629	0.785591	0.210002	1.51927e-05	0.000197836	Sulf2
ENSMUSG00000083307	54.194	0.782308	0.464015	0.00458792	0.022795	AA414768
ENSMUSG00000030064	279.289	0.780875	0.427671	0.00341028	0.0178065	Frmd4b
ENSMUSG00000027395	4356.09	0.778732	0.131946	3.04531e-10	1.80251e-08	Polr1b
ENSMUSG00000078713	5258.07	0.772937	0.107356	6.10384e-14	8.01798e-12	Tomm5
ENSMUSG00000056209	1345.89	0.769311	0.122228	3.01523e-11	2.29203e-09	Npm3
ENSMUSG00000000673	897.078	0.767847	0.137266	2.21339e-09	1.04231e-07	Haao
ENSMUSG00000025511	990.334	0.767149	0.132445	7.22865e-10	3.89385e-08	Tspan4
ENSMUSG00000004105	1145.78	0.766745	0.161679	1.86295e-07	4.54359e-06	Angptl2
ENSMUSG00000046909	1157.43	0.763127	0.121507	3.41365e-11	2.56882e-09	Tefm
ENSMUSG00000097039	111.218	0.761602	0.330719	0.00143193	0.00882437	Pvt1
ENSMUSG00000025068	3876.88	0.757649	0.112718	1.94295e-12	1.90168e-10	Gsto1
ENSMUSG00000096255	1514.43	0.755316	0.190852	6.8436e-06	0.000100179	Dynlt1b
ENSMUSG00000072763	349.625	0.754094	0.219872	5.29443e-05	0.0005708	5430403G16Rik
ENSMUSG00000043439	229.326	0.753278	0.165638	5.28759e-07	1.11838e-05	Epop
ENSMUSG00000006442	12336.7	0.752618	0.122939	1.23776e-10	8.12961e-09	Srm
ENSMUSG00000036278	615.537	0.752086	0.121471	6.38336e-11	4.55194e-09	Macrod1
ENSMUSG00000032584	383.433	0.751666	0.235843	0.000115478	0.00109587	Mst1r
ENSMUSG00000097792	87.2569	0.75075	0.301366	0.000900325	0.00603238	Gm27042
ENSMUSG00000066363	434.009	0.748698	0.394623	0.003423	0.0178604	Serpina3f
ENSMUSG00000025937	1082.48	0.744196	0.169959	1.14752e-06	2.18628e-05	Lactb2
ENSMUSG00000023966	3217.1	0.738872	0.0847099	2.99983e-19	8.16772e-17	Rsph9
ENSMUSG00000022346	12726.5	0.738633	0.108434	1.05382e-12	1.10356e-10	Myc
ENSMUSG00000002504	119.99	0.738632	0.305429	0.00115021	0.00735454	Slc9a3r2
ENSMUSG00000053963	72.0585	0.738279	0.417609	0.00440052	0.0220541	Stum
ENSMUSG00000030156	2037.16	0.737306	0.0997405	1.62349e-14	2.29356e-12	Cd69
ENSMUSG00000002319	920.653	0.73525	0.134435	4.76615e-09	1.96923e-07	Ipo4
ENSMUSG00000031736	42.9866	0.73048	0.366899	0.00303257	0.0161784	Crnde
ENSMUSG00000032556	8293.62	0.728002	0.0869	6.77928e-18	1.42986e-15	Bfsp2
ENSMUSG00000057605	125.734	0.726562	0.194676	1.80165e-05	0.000228836	Gm6807
ENSMUSG00000106755	53.727	0.72542	0.28927	0.000949546	0.00630735	Tpi-rs11
ENSMUSG00000050538	39.9851	0.723929	0.630685	0.00938105	0.0398868	B230217C12Rik
ENSMUSG00000067586	181.283	0.723452	0.289152	0.000957344	0.00634346	S1pr3
ENSMUSG00000002797	319.44	0.722739	0.142745	4.39009e-08	1.32011e-06	Ggct
ENSMUSG00000027076	1483.21	0.722629	0.129465	2.55187e-09	1.17542e-07	Timm10
ENSMUSG00000004612	1475.48	0.721049	0.188089	1.22462e-05	0.000163739	Nkg7
ENSMUSG00000076613	33778.8	0.720257	0.13886	2.10288e-08	6.89072e-07	Ighg2b
ENSMUSG00000031765	276.234	0.71929	0.229462	0.000152913	0.00138444	Mt1
ENSMUSG00000091337	1557.91	0.716813	0.171461	2.80846e-06	4.68337e-05	Eid1
ENSMUSG00000100680	86.6343	0.71429	0.254609	0.000431855	0.00328109	1810044D09Rik
ENSMUSG00000019139	4190.2	0.711465	0.106752	2.9575e-12	2.82983e-10	Isyna1
ENSMUSG00000112825	579.2	0.707402	0.126326	2.31491e-09	1.08331e-07	Gm9118
ENSMUSG00000026603	999.032	0.706954	0.174443	4.95749e-06	7.66135e-05	Smyd2
ENSMUSG00000067547	89.3791	0.705037	0.23489	0.000235594	0.00199775	Gm7666
ENSMUSG00000054321	1090.21	0.704496	0.168234	2.92057e-06	4.83266e-05	Taf4b
ENSMUSG00000034334	175.343	0.70259	0.232363	0.000222023	0.00190206	Fam151b
ENSMUSG00000034959	397.582	0.701105	0.125624	2.54936e-09	1.17542e-07	Rubcnl
ENSMUSG00000068407	2079.06	0.697632	0.0924313	4.69687e-15	7.17711e-13	Rnase12
ENSMUSG00000078867	50.2014	0.697424	0.468467	0.00658168	0.0302612	Gm14418
ENSMUSG00000034353	7337.37	0.6956	0.103801	2.29993e-12	2.22203e-10	Ramp1
ENSMUSG00000025262	249.014	0.695091	0.316449	0.00202918	0.0116828	Fam120c
ENSMUSG00000027430	2102.7	0.694449	0.0823749	4.20539e-18	9.39936e-16	Dtd1
ENSMUSG00000032719	59.8724	0.693908	0.310241	0.00189423	0.0110374	Sbspon
ENSMUSG00000046157	4363.03	0.693508	0.143359	1.37213e-07	3.4945e-06	Tmem229b
ENSMUSG00000040751	117.724	0.693385	0.225322	0.000195233	0.00171072	Lat2
ENSMUSG00000020741	4368.21	0.691659	0.181796	1.06022e-05	0.000144862	Cluh
ENSMUSG00000082365	22.1396	0.69076	0.688796	0.0104684	0.0433956	Gm15754
ENSMUSG00000033161	6167.13	0.689487	0.143506	1.67842e-07	4.16131e-06	Atp1a1
ENSMUSG00000042354	10988.2	0.686772	0.120831	1.51787e-09	7.37991e-08	Gnl3
ENSMUSG00000085385	311.521	0.685569	0.170147	5.9506e-06	8.94681e-05	Snhg17
ENSMUSG00000033706	3439.83	0.682685	0.0909704	7.95618e-15	1.19144e-12	Smyd5
ENSMUSG00000039682	5209.71	0.682146	0.0845823	1.24663e-16	2.27661e-14	Lap3
ENSMUSG00000038900	4467	0.681171	0.11079	1.00173e-10	6.68096e-09	Rpl12
ENSMUSG00000027804	11804.4	0.680371	0.119802	1.80559e-09	8.61104e-08	Ppid
ENSMUSG00000063320	524.774	0.679838	0.147143	4.09606e-07	9.00712e-06	1190007I07Rik
ENSMUSG00000034634	11137.3	0.679693	0.115006	3.97231e-10	2.27913e-08	Ly6d
ENSMUSG00000001436	5119.1	0.679687	0.102292	3.75263e-12	3.49041e-10	Slc19a1
ENSMUSG00000017195	53.4747	0.678416	0.396994	0.00552565	0.0262771	Zpbp2
ENSMUSG00000111877	203.54	0.675828	0.196568	5.86268e-05	0.000621244	Gm6477
ENSMUSG00000083836	397.005	0.675173	0.145372	3.87034e-07	8.58642e-06	Ldha-ps2
ENSMUSG00000018446	13624.8	0.674045	0.113032	1.97338e-10	1.22113e-08	C1qbp
ENSMUSG00000081855	177.491	0.671002	0.195569	6.1737e-05	0.000648781	Rpl17-ps5
ENSMUSG00000033307	20265.4	0.670887	0.120012	2.8095e-09	1.27492e-07	Mif
ENSMUSG00000028261	2427.29	0.67034	0.12733	1.63954e-08	5.65267e-07	Ndufaf4
ENSMUSG00000039982	620.271	0.670251	0.264178	0.00101747	0.00666573	Dtx4
ENSMUSG00000057497	9759.61	0.669496	0.107869	8.26163e-11	5.67513e-09	Fam136a
ENSMUSG00000022914	770.678	0.668704	0.153171	1.31024e-06	2.45567e-05	Brwd1
ENSMUSG00000050071	57.4634	0.66862	0.34895	0.00404635	0.0205708	Bex1
ENSMUSG00000032589	548.301	0.667217	0.172815	1.23008e-05	0.000164321	Bsn
ENSMUSG00000020131	474.077	0.665561	0.219354	0.000237613	0.00201145	Pcsk4
ENSMUSG00000048007	2525.29	0.665303	0.120054	3.68153e-09	1.598e-07	Timm8a1
ENSMUSG00000036781	8030.19	0.664343	0.0950468	3.37646e-13	3.83049e-11	Rps27l
ENSMUSG00000029322	14796.9	0.664216	0.101123	8.60652e-12	7.44986e-10	Plac8
ENSMUSG00000047221	944.524	0.663327	0.163647	5.62978e-06	8.50716e-05	Fam185a
ENSMUSG00000020650	5495.33	0.661796	0.150258	1.2164e-06	2.29464e-05	Bcap29
ENSMUSG00000020116	4364.59	0.661198	0.12767	2.78676e-08	8.86025e-07	Pno1
ENSMUSG00000034203	3606	0.661061	0.0973405	1.38503e-12	1.41094e-10	Chchd4
ENSMUSG00000020268	460.465	0.659861	0.11906	3.53423e-09	1.53852e-07	Lyrm7
ENSMUSG00000083626	1110.55	0.6595	0.133645	9.4069e-08	2.52452e-06	Gm4459
ENSMUSG00000024177	2203.92	0.655445	0.0955518	9.38966e-13	9.97235e-11	Nme4
ENSMUSG00000078789	695.835	0.655193	0.138077	2.65801e-07	6.22907e-06	Dph1
ENSMUSG00000044986	262.085	0.654435	0.200651	0.000118889	0.00112388	Tst
ENSMUSG00000028690	1945.63	0.653009	0.0887886	2.69577e-14	3.73788e-12	Mmachc
ENSMUSG00000025980	34820	0.652482	0.111277	7.39637e-10	3.95574e-08	Hspd1
ENSMUSG00000086795	90.4114	0.650153	0.416838	0.00702071	0.0317821	Gm11579
ENSMUSG00000025869	5773.55	0.64984	0.111067	7.01689e-10	3.84043e-08	Nop16
ENSMUSG00000002825	1528.4	0.649362	0.117176	3.77731e-09	1.62544e-07	Qtrt1
ENSMUSG00000031657	3163.23	0.648796	0.122026	1.31943e-08	4.73823e-07	Heatr3
ENSMUSG00000030852	158.434	0.647512	0.290394	0.00199368	0.0115138	Tacc2
ENSMUSG00000030725	637.965	0.647379	0.178588	3.20458e-05	0.000369712	Lipt2
ENSMUSG00000039001	1290.97	0.646868	0.177198	3.01781e-05	0.00035251	Rps21
ENSMUSG00000063229	95048.2	0.646688	0.105311	1.04906e-10	6.95119e-09	Ldha
ENSMUSG00000001056	8679.81	0.64639	0.100722	1.84345e-11	1.44532e-09	Nhp2
ENSMUSG00000028741	3695.74	0.646178	0.10748	2.13765e-10	1.30659e-08	Mrto4
ENSMUSG00000051890	237.735	0.644469	0.252265	0.000940139	0.00625714	Klhdc1
ENSMUSG00000018821	67.0577	0.64436	0.294241	0.00234678	0.0131833	Avpi1
ENSMUSG00000038845	10715.1	0.64397	0.108464	3.54181e-10	2.06376e-08	Phb
ENSMUSG00000030189	16169.5	0.643465	0.099216	1.62811e-11	1.29686e-09	Ybx3
ENSMUSG00000046598	1581.89	0.642936	0.147519	1.53626e-06	2.80932e-05	Bdh1
ENSMUSG00000025591	1053.45	0.642758	0.13684	3.17847e-07	7.27791e-06	Tma16
ENSMUSG00000025050	1763.99	0.641158	0.103419	7.2636e-11	5.10668e-09	Pcgf6
ENSMUSG00000092203	533.633	0.639754	0.140294	6.87785e-07	1.3994e-05	1110038B12Rik
ENSMUSG00000000628	336.918	0.639259	0.250103	0.000995947	0.00654689	Hk2
ENSMUSG00000006589	2446.44	0.638607	0.126987	6.43936e-08	1.80145e-06	Aprt
ENSMUSG00000038593	119.102	0.63838	0.260529	0.00130749	0.00816841	Tctn1
ENSMUSG00000057322	3095.84	0.637699	0.144594	1.16825e-06	2.2145e-05	Rpl38
ENSMUSG00000038264	97.7896	0.631867	0.643949	0.0122072	0.04893	Sema7a
ENSMUSG00000021265	201.316	0.629868	0.212951	0.000325962	0.00261871	Slc25a29
ENSMUSG00000034424	5033.39	0.628468	0.107576	7.37239e-10	3.95574e-08	Gcsh
ENSMUSG00000105388	607.353	0.628087	0.147829	2.70314e-06	4.54826e-05	Rpl36a-ps2
ENSMUSG00000056952	327.712	0.626144	0.247962	0.00112733	0.00725162	Tatdn2
ENSMUSG00000056671	282.755	0.626142	0.145326	1.80419e-06	3.2318e-05	Prelid2
ENSMUSG00000040570	411.099	0.626071	0.222199	0.000498067	0.00369601	Rundc3b
ENSMUSG00000020460	12013.9	0.625613	0.104456	3.82114e-10	2.20083e-08	Rps27a
ENSMUSG00000010048	3144.58	0.625526	0.125413	8.58491e-08	2.32476e-06	Ifrd2
ENSMUSG00000027072	143.785	0.62347	0.483462	0.0107477	0.0442404	Prg3
ENSMUSG00000027133	8555	0.623017	0.0960175	1.23912e-11	1.01398e-09	Nop10
ENSMUSG00000058600	3212.31	0.621352	0.122212	4.7463e-08	1.41585e-06	Rpl30
ENSMUSG00000002289	175.076	0.620346	0.221697	0.000550254	0.00401183	Angptl4
ENSMUSG00000039197	8218.51	0.61982	0.125899	1.15653e-07	3.01199e-06	Adk
ENSMUSG00000057561	7596.68	0.618994	0.126595	1.35766e-07	3.46416e-06	Eif1a
ENSMUSG00000021643	179.727	0.618879	0.163503	1.85281e-05	0.000233758	Serf1
ENSMUSG00000030695	7651.67	0.616943	0.110855	3.28275e-09	1.45442e-07	Aldoa
ENSMUSG00000006315	2967.89	0.616647	0.105441	5.87226e-10	3.23298e-08	Tmem147
ENSMUSG00000025962	3564.55	0.616492	0.114759	9.66445e-09	3.67323e-07	Fastkd2
ENSMUSG00000025086	902.397	0.614831	0.122339	6.45997e-08	1.80145e-06	Trub1
ENSMUSG00000037601	3780.17	0.614077	0.122425	7.04711e-08	1.95065e-06	Nme1
ENSMUSG00000022848	752.897	0.613948	0.167659	3.07867e-05	0.000357944	Dirc2
ENSMUSG00000053801	5132.35	0.613539	0.0948097	1.36686e-11	1.10642e-09	Grwd1
ENSMUSG00000028936	2345.43	0.613235	0.115039	1.31393e-08	4.72984e-07	Rpl22
ENSMUSG00000062353	219.784	0.612184	0.128357	2.40732e-07	5.71308e-06	Gm15772
ENSMUSG00000026798	1202.05	0.611989	0.126159	1.60833e-07	4.01413e-06	Coq4
ENSMUSG00000020182	405.81	0.611387	0.184867	0.00010507	0.00101708	Ddc
ENSMUSG00000022323	807.08	0.609917	0.173198	5.1593e-05	0.000559453	Rida
ENSMUSG00000026594	1879.14	0.609703	0.115427	1.73607e-08	5.86856e-07	Ralgps2
ENSMUSG00000079641	4602.71	0.609595	0.151182	6.56054e-06	9.66019e-05	Rpl39
ENSMUSG00000021993	2407.48	0.609347	0.107604	2.32498e-09	1.08463e-07	Mipep
ENSMUSG00000072774	627.12	0.607605	0.176083	6.68743e-05	0.000694482	Zfp951
ENSMUSG00000080921	295.643	0.607544	0.180452	8.96974e-05	0.000894287	Rpl38-ps2
ENSMUSG00000071451	1008.39	0.606327	0.120111	5.97587e-08	1.70072e-06	Psmg4
ENSMUSG00000069682	790.735	0.604645	0.117177	3.24316e-08	1.00137e-06	Gm10275
ENSMUSG00000033294	7237.7	0.604433	0.101365	3.1305e-10	1.84564e-08	Noc4l
ENSMUSG00000011179	9791.14	0.60407	0.105239	1.33158e-09	6.60277e-08	Odc1
ENSMUSG00000072692	411.473	0.602421	0.173113	6.04754e-05	0.000638659	Rpl37rt
ENSMUSG00000021079	1791.55	0.600197	0.113383	1.71981e-08	5.84172e-07	Timm9
ENSMUSG00000030498	823.687	0.60003	0.165524	3.67867e-05	0.00041765	Gas2
ENSMUSG00000006369	129.442	0.599329	0.433363	0.00959926	0.0405915	Fbln1
ENSMUSG00000002308	1362.19	0.598872	0.118429	5.81075e-08	1.66061e-06	Cd320
ENSMUSG00000058809	1145.08	0.598243	0.143112	3.82435e-06	6.08605e-05	Hspd1-ps3
ENSMUSG00000033174	181.922	0.597022	0.197164	0.000286545	0.00234738	Mgll
ENSMUSG00000022768	81.3244	0.596935	0.377104	0.00837148	0.0365703	Ccdc116
ENSMUSG00000058558	27958.3	0.596199	0.112366	1.58141e-08	5.52019e-07	Rpl5
ENSMUSG00000113061	155.082	0.595321	0.201809	0.000366644	0.0028686	Gm11361
ENSMUSG00000039715	1671.72	0.59472	0.118413	7.15934e-08	1.97806e-06	Wdr34
ENSMUSG00000105143	105.917	0.594492	0.199502	0.000343641	0.00272339	Gm8069
ENSMUSG00000029507	1921.85	0.59421	0.131646	8.7029e-07	1.72161e-05	Pus1
ENSMUSG00000058392	3849.61	0.591829	0.11133	1.60869e-08	5.59687e-07	Rrp1b
ENSMUSG00000030431	326.473	0.589243	0.207057	0.000500393	0.00371144	Tmem238
ENSMUSG00000038046	1413.64	0.589039	0.0899937	9.08826e-12	7.82165e-10	Mrm3
ENSMUSG00000082016	30.9365	0.588265	0.34932	0.00752628	0.0335835	Pgam1-ps2
ENSMUSG00000115338	2570.4	0.588128	0.102444	1.43608e-09	7.02893e-08	Pnp
ENSMUSG00000113749	160.869	0.587625	0.170707	7.37855e-05	0.000753709	Mrto4-ps1
ENSMUSG00000026701	11253.8	0.586189	0.0939075	6.79924e-11	4.82553e-09	Prdx6
ENSMUSG00000027185	3295.98	0.586109	0.166131	5.44041e-05	0.000581929	Nat10
ENSMUSG00000025436	939.897	0.58423	0.134202	1.89403e-06	3.36853e-05	Atp23
ENSMUSG00000023982	61.655	0.583306	0.379596	0.00930007	0.0396551	Guca1a
ENSMUSG00000062995	283.57	0.5829	0.16638	5.86336e-05	0.000621244	Ica1
ENSMUSG00000006301	1004.93	0.582754	0.112252	2.95522e-08	9.23223e-07	Tmbim1
ENSMUSG00000026019	5815.69	0.582635	0.12893	8.97782e-07	1.76434e-05	Wdr12
ENSMUSG00000044345	104.769	0.582157	0.288771	0.00420754	0.0212649	Marveld1
ENSMUSG00000003955	2086.06	0.581614	0.103786	3.04604e-09	1.3657e-07	Fam162a
ENSMUSG00000011254	441.417	0.581006	0.130439	1.1893e-06	2.2487e-05	Thg1l
ENSMUSG00000082044	1120.84	0.579862	0.193893	0.000342906	0.00272029	Snrpert
ENSMUSG00000079435	3790.92	0.5783	0.114635	6.43098e-08	1.80145e-06	Rpl36a
ENSMUSG00000039680	919.742	0.577302	0.127908	9.01547e-07	1.76942e-05	Mrps6
ENSMUSG00000028927	758.558	0.57595	0.181274	0.000176662	0.00156818	Padi2
ENSMUSG00000050323	1758.73	0.575814	0.135114	2.85087e-06	4.73826e-05	Ndufaf6
ENSMUSG00000056665	854.012	0.575676	0.17899	0.000171646	0.00153179	Them6
ENSMUSG00000021595	18341	0.57565	0.0850286	3.02492e-12	2.86698e-10	Nsun2
ENSMUSG00000022686	1853.89	0.575648	0.166031	9.51254e-05	0.000936557	B3gnt5
ENSMUSG00000060636	4713.82	0.572248	0.114826	8.85068e-08	2.39117e-06	Rpl35a
ENSMUSG00000067367	6958.51	0.571801	0.123008	4.96233e-07	1.06158e-05	Lyar
ENSMUSG00000063457	7011.37	0.571547	0.095135	2.8422e-10	1.70931e-08	Rps15
ENSMUSG00000022607	776.067	0.571281	0.149392	1.82031e-05	0.000230424	Ptk2
ENSMUSG00000040463	18456	0.571222	0.123298	4.97942e-07	1.06372e-05	Mybbp1a
ENSMUSG00000024436	558.867	0.571053	0.112364	5.52033e-08	1.59897e-06	Mrps18b
ENSMUSG00000021211	47.3418	0.570105	0.391232	0.0107272	0.0441803	Akr1c12
ENSMUSG00000043592	149.458	0.568484	0.233117	0.00168236	0.0100452	Unc5cl
ENSMUSG00000004264	8395.94	0.568372	0.0930607	1.91475e-10	1.19473e-08	Phb2
ENSMUSG00000026749	1613.63	0.568247	0.157506	4.2221e-05	0.000470431	Nek6
ENSMUSG00000032513	717.52	0.568149	0.219161	0.00111413	0.00717597	Gorasp1
ENSMUSG00000000561	3532.2	0.566437	0.106277	1.48822e-08	5.24377e-07	Wdr77
ENSMUSG00000038335	2434.89	0.5664	0.148475	1.92281e-05	0.000240754	Tsr1
ENSMUSG00000087590	153.485	0.566015	0.238912	0.00199482	0.011516	Epb41l4aos
ENSMUSG00000031239	384.067	0.56596	0.232229	0.00169363	0.0101045	Itm2a
ENSMUSG00000000384	1811.76	0.565877	0.146016	1.50661e-05	0.000196414	Tbrg4
ENSMUSG00000060938	10105.5	0.565318	0.0923265	1.81305e-10	1.14077e-08	Rpl26
ENSMUSG00000043664	70.0226	0.564557	0.38082	0.0102351	0.0425872	Tmem221
ENSMUSG00000031939	3191.68	0.564436	0.112019	6.18123e-08	1.74979e-06	Taf1d
ENSMUSG00000097616	105.021	0.563644	0.259408	0.0032081	0.0169279	1110019D14Rik
ENSMUSG00000032184	170.934	0.563102	0.276664	0.00431524	0.0216994	Lysmd2
ENSMUSG00000024785	4143.52	0.563067	0.112933	9.78635e-08	2.60303e-06	Rcl1
ENSMUSG00000046721	3212.26	0.562946	0.101887	5.14831e-09	2.08932e-07	Rpl14-ps1
ENSMUSG00000040631	82.2418	0.561654	0.326919	0.00774012	0.0343942	Dok4
ENSMUSG00000096965	172.635	0.561376	0.196444	0.000544345	0.00397638	3300005D01Rik
ENSMUSG00000001305	2989.59	0.560638	0.109059	4.40327e-08	1.32142e-06	Rrp15
ENSMUSG00000039640	1239.68	0.559857	0.110886	6.45207e-08	1.80145e-06	Mrpl12
ENSMUSG00000039787	557.957	0.55838	0.153317	3.83265e-05	0.000433488	Cercam
ENSMUSG00000037275	3890.65	0.558305	0.142022	1.25249e-05	0.000166572	Gemin5
ENSMUSG00000026811	591.887	0.558185	0.119724	4.98808e-07	1.06405e-05	St6galnac6
ENSMUSG00000026036	1848.5	0.557852	0.161737	7.86817e-05	0.000793974	Nif3l1
ENSMUSG00000025940	4255.14	0.555387	0.10243	1.03247e-08	3.85568e-07	Tmem70
ENSMUSG00000030316	2708.1	0.553748	0.105697	2.56797e-08	8.21695e-07	Tamm41
ENSMUSG00000026730	293.85	0.553194	0.244254	0.00271824	0.0148669	Pter
ENSMUSG00000021930	789.401	0.553133	0.182859	0.000328537	0.00263375	Spryd7
ENSMUSG00000108702	375.317	0.553009	0.122178	9.16787e-07	1.78995e-05	Gm9333
ENSMUSG00000038510	4286.2	0.552449	0.120103	6.97623e-07	1.41174e-05	Rpf2
ENSMUSG00000020372	27940.9	0.55175	0.099245	5.12298e-09	2.08932e-07	Rack1
ENSMUSG00000086290	97.4014	0.551426	0.302294	0.00645551	0.0298368	Snhg12
ENSMUSG00000005718	266.03	0.551323	0.152661	4.44796e-05	0.000491573	Tfap4
ENSMUSG00000062328	5683.18	0.551172	0.110734	1.01906e-07	2.69299e-06	Rpl17
ENSMUSG00000031917	5409.86	0.549685	0.0971739	3.36948e-09	1.48843e-07	Nip7
ENSMUSG00000031403	20856.9	0.54959	0.0954941	1.47782e-09	7.2086e-08	Dkc1
ENSMUSG00000042462	3938.37	0.549322	0.11861	5.8736e-07	1.22163e-05	Dctpp1
ENSMUSG00000026377	9077.49	0.54892	0.106242	4.46558e-08	1.33744e-06	Nifk
ENSMUSG00000020547	11507.4	0.548291	0.100695	8.2424e-09	3.18118e-07	Bzw2
ENSMUSG00000078941	2833.54	0.5465	0.121179	1.16109e-06	2.20372e-05	Ak6
ENSMUSG00000027618	2071.54	0.545831	0.087869	8.80468e-11	5.93919e-09	Nfs1
ENSMUSG00000035049	2671.72	0.545603	0.158838	8.47961e-05	0.000850204	Rrp12
ENSMUSG00000025403	17498	0.544662	0.119451	9.05899e-07	1.77526e-05	Shmt2
ENSMUSG00000026234	71787.8	0.544368	0.0951347	1.69757e-09	8.17401e-08	Ncl
ENSMUSG00000029447	32670.5	0.543798	0.0867567	7.33157e-11	5.13039e-09	Cct6a
ENSMUSG00000029415	1985.52	0.543517	0.157559	8.2648e-05	0.000831148	Sdad1
ENSMUSG00000075229	1471.18	0.543276	0.100563	1.07234e-08	3.97482e-07	Ccdc58
ENSMUSG00000062006	5813.39	0.542468	0.113786	2.96055e-07	6.82066e-06	Rpl34
ENSMUSG00000024669	103.792	0.541918	0.353574	0.0106803	0.044048	Cd5
ENSMUSG00000081895	547.136	0.541858	0.138467	1.39434e-05	0.000183804	Rpl17-ps10
ENSMUSG00000006057	8658.2	0.540781	0.104749	3.20603e-08	9.91949e-07	Atp5g1
ENSMUSG00000027324	569.36	0.540729	0.193855	0.000708147	0.00491632	Rpusd2
ENSMUSG00000073016	206.354	0.54053	0.318907	0.00858002	0.0372423	Uprt
ENSMUSG00000047250	116.874	0.539755	0.303919	0.00741321	0.0331778	Ptgs1
ENSMUSG00000015176	10028.2	0.539752	0.100171	1.22056e-08	4.41839e-07	Nolc1
ENSMUSG00000025290	8986.93	0.539078	0.105143	5.20894e-08	1.52679e-06	Rps24
ENSMUSG00000034875	4554.45	0.538813	0.101823	2.03188e-08	6.73208e-07	Nudt19
ENSMUSG00000037251	340.788	0.538625	0.263647	0.00460454	0.0228548	Pomk
ENSMUSG00000114003	707.229	0.538351	0.100964	1.61173e-08	5.59687e-07	Gm9616
ENSMUSG00000084416	152.173	0.537809	0.202539	0.00107312	0.00695671	Rpl10a-ps1
ENSMUSG00000032215	3409.88	0.537502	0.0880708	1.69057e-10	1.07729e-08	Rsl24d1
ENSMUSG00000026784	1496.68	0.537381	0.102839	2.91108e-08	9.15829e-07	Pdss1
ENSMUSG00000021694	1196.48	0.536793	0.163249	0.00015344	0.0013867	Ercc8
ENSMUSG00000030246	207.427	0.536273	0.256455	0.00393861	0.0201162	Ldhb
ENSMUSG00000041747	4476.02	0.53567	0.103372	3.83931e-08	1.17095e-06	Utp15
ENSMUSG00000029246	8892.37	0.535403	0.11727	8.26341e-07	1.64335e-05	Ppat
ENSMUSG00000040213	941.895	0.534941	0.130261	6.34134e-06	9.41145e-05	Kyat3
ENSMUSG00000047675	16123.6	0.5348	0.104611	5.73086e-08	1.64405e-06	Rps8
ENSMUSG00000026694	1925.76	0.534622	0.115145	5.59839e-07	1.17089e-05	Mettl13
ENSMUSG00000027199	783.736	0.533512	0.178813	0.000405068	0.00311253	Gatm
ENSMUSG00000037278	5846.91	0.533391	0.0980172	8.10804e-09	3.15371e-07	Tmem97
ENSMUSG00000049517	15540.5	0.531994	0.0978149	1.26159e-08	4.55235e-07	Rps23
ENSMUSG00000079043	668.067	0.531828	0.133802	1.09903e-05	0.000149075	Fastkd5
ENSMUSG00000095597	1262.71	0.53173	0.126429	4.17477e-06	6.56692e-05	Gm6472
ENSMUSG00000030041	117.473	0.531612	0.323957	0.00962276	0.0405992	M1ap
ENSMUSG00000083596	975.655	0.5316	0.0905907	7.87984e-10	4.16633e-08	Rpl21-ps15
ENSMUSG00000063696	117.589	0.531184	0.245262	0.00358542	0.0185913	Gm8730
ENSMUSG00000060950	1339.05	0.530955	0.100426	2.09063e-08	6.86561e-07	Trmt61a
ENSMUSG00000076441	2776.44	0.530764	0.0918215	1.29801e-09	6.45773e-08	Ass1
ENSMUSG00000023456	18328.4	0.530739	0.0871717	1.9822e-10	1.22154e-08	Tpi1
ENSMUSG00000089718	589.295	0.530669	0.14097	2.68023e-05	0.000315043	2310075C17Rik
ENSMUSG00000029392	78.7621	0.530494	0.307603	0.00838936	0.0366163	Rilpl1
ENSMUSG00000074578	745.11	0.529895	0.124341	3.30019e-06	5.40113e-05	Zfas1
ENSMUSG00000028010	2786.22	0.52915	0.070653	1.08407e-14	1.54609e-12	Gar1
ENSMUSG00000029276	955.053	0.528304	0.120159	1.82537e-06	3.26265e-05	Glmn
ENSMUSG00000045996	2307.23	0.527494	0.18075	0.000572083	0.00413463	Polr2k
ENSMUSG00000022325	952.669	0.527363	0.157866	0.000127548	0.00118562	Pop1
ENSMUSG00000091649	318.431	0.527327	0.211219	0.00168161	0.0100447	Phf11b
ENSMUSG00000093674	13251.6	0.527304	0.120934	2.49737e-06	4.24978e-05	Rpl41
ENSMUSG00000073702	6072.82	0.526762	0.107854	1.74844e-07	4.32062e-06	Rpl31
ENSMUSG00000067714	300.269	0.526324	0.166256	0.000233099	0.0019822	Lpar5
ENSMUSG00000004661	247.765	0.524965	0.242866	0.0036663	0.0189451	Arid3b
ENSMUSG00000083161	915.075	0.524923	0.155442	0.000116148	0.00110083	Gm11427
ENSMUSG00000034266	277.419	0.524774	0.195203	0.000996474	0.00654689	Batf
ENSMUSG00000024359	33032.4	0.524597	0.0905867	1.11955e-09	5.7007e-08	Hspa9
ENSMUSG00000085156	1322.79	0.524358	0.119547	1.92645e-06	3.40598e-05	Snhg15
ENSMUSG00000000355	4014.94	0.522251	0.105357	1.26725e-07	3.25507e-06	Mcts1
ENSMUSG00000046794	294.981	0.522109	0.285154	0.00734251	0.0329598	Ppp1r3b
ENSMUSG00000062937	4984.27	0.521958	0.0839932	1.00382e-10	6.68096e-09	Mtap
ENSMUSG00000040010	8004.17	0.521602	0.117238	1.5106e-06	2.76902e-05	Slc7a5
ENSMUSG00000034164	1022.27	0.521492	0.146021	5.52156e-05	0.000590188	Emid1
ENSMUSG00000024078	1771.45	0.521298	0.104456	1.07744e-07	2.83064e-06	Ttc27
ENSMUSG00000028657	13049.4	0.521285	0.0785787	5.80216e-12	5.23418e-10	Ppt1
ENSMUSG00000029036	6970.43	0.520901	0.0934213	2.90762e-09	1.31546e-07	Atad3a
ENSMUSG00000053553	2237.54	0.52086	0.135261	2.22067e-05	0.000271023	3110082I17Rik
ENSMUSG00000116564	2386.31	0.520211	0.0972657	1.64201e-08	5.65267e-07	Riok2
ENSMUSG00000071415	7583.47	0.519619	0.0967462	1.42817e-08	5.08561e-07	Rpl23
ENSMUSG00000063275	849.078	0.518243	0.144762	5.33822e-05	0.000574387	Hacd1
ENSMUSG00000005846	18241.8	0.518128	0.109081	3.5281e-07	7.95053e-06	Rsl1d1
ENSMUSG00000028798	7306.51	0.518009	0.0921862	3.44545e-09	1.51307e-07	Eif3i
ENSMUSG00000107176	2244.67	0.51705	0.105901	1.06049e-07	2.79592e-06	Gm9794
ENSMUSG00000033287	421.254	0.517001	0.130254	1.21023e-05	0.000162103	Kctd17
ENSMUSG00000032578	506.416	0.516898	0.193376	0.00111489	0.00717773	Cish
ENSMUSG00000018428	1679.65	0.516468	0.113285	8.3821e-07	1.66475e-05	Akap1
ENSMUSG00000024608	18284.5	0.516446	0.0951723	9.87119e-09	3.73286e-07	Rps14
ENSMUSG00000035960	905.591	0.516028	0.142772	5.22704e-05	0.000565162	Apex1
ENSMUSG00000026525	266.313	0.515611	0.165435	0.000284563	0.00233497	Opn3
ENSMUSG00000059325	260.983	0.515364	0.208713	0.00188681	0.0110027	Hopx
ENSMUSG00000052146	6376.51	0.514686	0.111329	6.55647e-07	1.33947e-05	Rps10
ENSMUSG00000103653	990.718	0.514503	0.115819	1.51071e-06	2.76902e-05	Gstp-ps
ENSMUSG00000035754	6655.02	0.514449	0.101339	6.98154e-08	1.93608e-06	Wdr18
ENSMUSG00000005981	12728.3	0.513963	0.0876154	8.7991e-10	4.60722e-08	Trap1
ENSMUSG00000058402	192.612	0.513944	0.297837	0.00843043	0.0367091	Zfp420
ENSMUSG00000107383	594.588	0.513255	0.106167	2.37233e-07	5.63898e-06	Gm4366
ENSMUSG00000070643	186.404	0.51315	0.186899	0.00088867	0.00597836	Sox13
ENSMUSG00000042389	1322.17	0.512815	0.134605	2.31914e-05	0.000280146	Tsen2
ENSMUSG00000061787	9856.05	0.512351	0.109574	5.02639e-07	1.0707e-05	Rps17
ENSMUSG00000041438	7164	0.51211	0.0946395	1.22151e-08	4.41839e-07	Utp4
ENSMUSG00000041841	4054.36	0.512102	0.132076	1.755e-05	0.000223859	Rpl37
ENSMUSG00000106943	258.007	0.511591	0.230541	0.00331511	0.0173945	Dancr
ENSMUSG00000046865	9491.24	0.511198	0.108379	4.45941e-07	9.69226e-06	Fbl
ENSMUSG00000041057	13969.2	0.510872	0.106573	2.94314e-07	6.79098e-06	Wdr43
ENSMUSG00000091478	1548.58	0.50967	0.121047	4.394e-06	6.87566e-05	Gm10039
ENSMUSG00000080893	1260.19	0.509459	0.153542	0.000141221	0.00129107	Gm15920
ENSMUSG00000091277	185.254	0.509121	0.169601	0.000416702	0.00318373	Gm1818
ENSMUSG00000058355	17943.2	0.508611	0.102924	1.49961e-07	3.77424e-06	Abce1
ENSMUSG00000061477	10796.4	0.508328	0.113043	1.48354e-06	2.73596e-05	Rps7
ENSMUSG00000008668	20630.3	0.50765	0.0856145	5.7668e-10	3.18663e-08	Rps18
ENSMUSG00000032456	514.786	0.506762	0.183105	0.000837928	0.00569327	Nmnat3
ENSMUSG00000081157	208.684	0.506553	0.206156	0.0019716	0.0114126	Gm13552
ENSMUSG00000006732	1243.25	0.506454	0.12675	1.08587e-05	0.000147693	Mettl1
ENSMUSG00000053332	4731.86	0.506363	0.0944786	1.36561e-08	4.88066e-07	Gas5
ENSMUSG00000059291	8648.69	0.506167	0.0972668	3.69271e-08	1.13085e-06	Rpl11
ENSMUSG00000062997	1526.31	0.506051	0.170646	0.000482435	0.00359869	Rpl35
ENSMUSG00000078495	1724.28	0.5059	0.233678	0.00393806	0.0201162	Zfp984
ENSMUSG00000113948	474.329	0.505296	0.179065	0.000740383	0.00510462	Rpl17-ps3
ENSMUSG00000012848	12165	0.504194	0.0946515	1.89397e-08	6.33086e-07	Rps5
ENSMUSG00000063785	1271.8	0.504116	0.0961105	2.89204e-08	9.11753e-07	Utp14a
ENSMUSG00000026921	1831.92	0.503985	0.0902528	4.10333e-09	1.74355e-07	Egfl7
ENSMUSG00000057841	12514.4	0.503837	0.10723	4.31663e-07	9.40924e-06	Rpl32
ENSMUSG00000021418	998.318	0.503832	0.131831	2.28994e-05	0.000277667	Rpp40
ENSMUSG00000040565	2808.65	0.503	0.222856	0.0033236	0.0174329	Btaf1
ENSMUSG00000037499	223.723	0.502848	0.167313	0.000418952	0.0031944	Nenf
ENSMUSG00000100863	73.6564	0.502381	0.248534	0.0056289	0.0266665	Gm12669
ENSMUSG00000054021	708.141	0.501528	0.105305	3.49425e-07	7.90429e-06	Sirt5
ENSMUSG00000025967	8432.97	0.501526	0.0820001	1.65669e-10	1.06021e-08	Eef1b2
ENSMUSG00000083621	80.9803	0.501117	0.28286	0.0088195	0.0379954	Gm14586
ENSMUSG00000071644	20909	0.500877	0.0917587	9.0363e-09	3.46083e-07	Eef1g
ENSMUSG00000057863	4610.76	0.500792	0.146087	9.10142e-05	0.000904404	Rpl36
ENSMUSG00000062647	5648.51	0.500677	0.100154	1.10348e-07	2.88387e-06	Rpl7a
ENSMUSG00000020706	7633.54	0.500001	0.122771	8.31977e-06	0.00011787	Ftsj3
ENSMUSG00000040651	930.645	-0.500382	0.148124	0.000121216	0.00114164	Fam208a
ENSMUSG00000040723	17156.3	-0.501217	0.0804467	8.21276e-11	5.66756e-09	Rcsd1
ENSMUSG00000041229	1722.08	-0.501672	0.167101	0.000417222	0.00318445	Phf8
ENSMUSG00000050410	6824.43	-0.50184	0.115483	2.5511e-06	4.32158e-05	Tcf19
ENSMUSG00000028173	3860.84	-0.502044	0.0942824	1.83369e-08	6.15684e-07	Wls
ENSMUSG00000024030	970.272	-0.502813	0.153984	0.000177195	0.00157105	Abcg1
ENSMUSG00000031153	1417.14	-0.502826	0.113085	1.54551e-06	2.82245e-05	Gripap1
ENSMUSG00000074570	186.442	-0.502831	0.291458	0.00951001	0.0402636	Cass4
ENSMUSG00000043391	478.928	-0.503374	0.210404	0.00230034	0.01296	2510009E07Rik
ENSMUSG00000052539	685.612	-0.504512	0.277296	0.00860077	0.0373135	Magi3
ENSMUSG00000033826	702.848	-0.504606	0.138569	4.42191e-05	0.000489779	Dnah8
ENSMUSG00000038481	1983.56	-0.504867	0.203159	0.00167871	0.0100394	Cdk19
ENSMUSG00000029461	432.985	-0.505215	0.220421	0.00292878	0.0157425	Fam168a
ENSMUSG00000026361	3331.12	-0.505542	0.125192	9.29669e-06	0.000129505	Cdc73
ENSMUSG00000040943	351.816	-0.505999	0.148357	0.000106238	0.00102574	Tet2
ENSMUSG00000048163	7858.59	-0.506604	0.094357	1.47911e-08	5.22399e-07	Selplg
ENSMUSG00000027075	2600.77	-0.5067	0.0753305	3.25054e-12	3.06144e-10	Slc43a1
ENSMUSG00000024777	580.941	-0.507124	0.17621	0.000593153	0.00425464	Ppp2r5b
ENSMUSG00000115902	496.258	-0.507515	0.165043	0.000335108	0.00266928	AC113595.1
ENSMUSG00000060301	716.346	-0.507591	0.247039	0.00494866	0.0241624	2610008E11Rik
ENSMUSG00000013707	640.744	-0.509594	0.133723	2.31665e-05	0.000280146	Tnfaip8l2
ENSMUSG00000059479	2882.4	-0.512155	0.0855286	4.09971e-10	2.34325e-08	B3gnt8
ENSMUSG00000024197	3641.73	-0.512453	0.113082	9.29498e-07	1.8124e-05	Plin3
ENSMUSG00000060441	322.563	-0.512605	0.230688	0.00325038	0.0171148	Trim5
ENSMUSG00000060675	962.381	-0.512983	0.116931	1.82578e-06	3.26265e-05	Pla2g16
ENSMUSG00000041439	658.142	-0.513362	0.15013	9.44705e-05	0.000930721	Mfsd6
ENSMUSG00000001138	1221.84	-0.513976	0.128112	1.01006e-05	0.000139279	Cnnm3
ENSMUSG00000036769	545.8	-0.51399	0.211803	0.00202753	0.0116778	Wdr44
ENSMUSG00000028028	180.737	-0.514677	0.322162	0.0103281	0.0429023	Alpk1
ENSMUSG00000032733	310.349	-0.515201	0.247086	0.00452859	0.0225451	Snx33
ENSMUSG00000028419	1725.03	-0.515219	0.138676	3.23157e-05	0.000371966	Chmp5
ENSMUSG00000029004	5170.62	-0.5158	0.11189	6.97305e-07	1.41174e-05	Kmt2e
ENSMUSG00000037791	1384.7	-0.515939	0.135696	2.31974e-05	0.000280146	Phf12
ENSMUSG00000073910	90.2843	-0.516551	0.305537	0.00925998	0.0395517	Mob3b
ENSMUSG00000026360	1978.72	-0.516598	0.114455	1.0625e-06	2.03464e-05	Rgs2
ENSMUSG00000056220	781.651	-0.516654	0.153531	0.000121398	0.00114264	Pla2g4a
ENSMUSG00000071573	212.067	-0.51733	0.182702	0.000680776	0.00475939	Rnls
ENSMUSG00000040033	1567.31	-0.51757	0.104968	1.40824e-07	3.56825e-06	Stat2
ENSMUSG00000049076	2404.47	-0.51767	0.176018	0.000485074	0.00361212	Acap2
ENSMUSG00000002668	486.494	-0.518458	0.153467	0.000112861	0.00107649	Dennd1c
ENSMUSG00000035413	1454.32	-0.519364	0.121402	3.16483e-06	5.20805e-05	Tmem98
ENSMUSG00000037617	90.7258	-0.519797	0.311338	0.00947261	0.0401721	Spag1
ENSMUSG00000037683	132.375	-0.519854	0.224304	0.00259187	0.0142748	Armc3
ENSMUSG00000015766	1688.31	-0.520028	0.151614	9.75125e-05	0.000955036	Eps8
ENSMUSG00000030172	312.654	-0.520192	0.214666	0.00199791	0.0115294	Erc1
ENSMUSG00000029605	192.413	-0.521022	0.26081	0.00513972	0.0248331	Oas1b
ENSMUSG00000029869	209.657	-0.521056	0.356532	0.012517	0.0498647	Ephb6
ENSMUSG00000061414	154.643	-0.521861	0.243727	0.0038258	0.019654	Cracr2a
ENSMUSG00000022558	570.041	-0.521964	0.286339	0.0071293	0.0321958	Mroh1
ENSMUSG00000020185	1762.85	-0.522447	0.126102	5.57949e-06	8.43969e-05	E2f7
ENSMUSG00000032609	269.481	-0.52251	0.21201	0.00182455	0.0107273	Klhdc8b
ENSMUSG00000053477	5822.55	-0.522784	0.0972864	1.34635e-08	4.82334e-07	Tcf4
ENSMUSG00000027339	1741.89	-0.523351	0.123389	3.63949e-06	5.84067e-05	Rassf2
ENSMUSG00000031662	1526.82	-0.52346	0.137114	2.0853e-05	0.000257651	Snx20
ENSMUSG00000029438	2234.72	-0.523604	0.141512	3.3228e-05	0.000381295	Bcl7a
ENSMUSG00000051977	170.211	-0.523771	0.250191	0.0042803	0.0215381	Prdm9
ENSMUSG00000027495	304.223	-0.523884	0.185918	0.000685011	0.00478008	Fam210b
ENSMUSG00000047888	428.525	-0.524134	0.171691	0.000328153	0.00263208	Tnrc6b
ENSMUSG00000000753	1460.23	-0.524337	0.112543	5.31269e-07	1.12211e-05	Serpinf1
ENSMUSG00000038623	1696.36	-0.524639	0.075485	6.32747e-13	6.96719e-11	Tm6sf1
ENSMUSG00000073888	101.583	-0.524639	0.287678	0.00727496	0.032745	Ccl27a
ENSMUSG00000030447	4324.02	-0.524916	0.0897031	7.19501e-10	3.88972e-08	Cyfip1
ENSMUSG00000031539	287.587	-0.525152	0.288686	0.00735763	0.0330178	Ap3m2
ENSMUSG00000020097	2356.98	-0.525276	0.153713	9.67173e-05	0.000948488	Sgpl1
ENSMUSG00000044080	164	-0.525323	0.226055	0.00256783	0.0141685	S100a1
ENSMUSG00000008398	1604.65	-0.525332	0.127115	5.3721e-06	8.15068e-05	Elk3
ENSMUSG00000042632	271.817	-0.525464	0.20728	0.00145795	0.0089442	Pla2g6
ENSMUSG00000105149	61.1213	-0.526573	0.334159	0.0106559	0.0439955	Gm42983
ENSMUSG00000032009	639.874	-0.52664	0.186789	0.000656792	0.00463499	Sesn3
ENSMUSG00000038065	259.441	-0.526679	0.320086	0.00966717	0.0407218	Mturn
ENSMUSG00000024300	1399.42	-0.527061	0.136724	1.81085e-05	0.000229614	Myo1f
ENSMUSG00000059013	2758.38	-0.527821	0.105352	6.20211e-08	1.75239e-06	Sh2d3c
ENSMUSG00000039531	1279.47	-0.527842	0.0989896	1.62183e-08	5.60898e-07	Zufsp
ENSMUSG00000031833	1961.67	-0.528839	0.142022	3.04844e-05	0.000355256	Mast3
ENSMUSG00000020527	285.135	-0.528941	0.254405	0.00433692	0.0217924	Myo19
ENSMUSG00000047767	2099.11	-0.529101	0.128676	6.41615e-06	9.49425e-05	Atg16l2
ENSMUSG00000032352	479.758	-0.529287	0.15587	0.000103576	0.00100521	Lrrc1
ENSMUSG00000022521	1830.24	-0.529408	0.134618	1.3099e-05	0.000173132	Crebbp
ENSMUSG00000028613	854.593	-0.529917	0.118296	1.296e-06	2.43203e-05	Lrp8
ENSMUSG00000078439	450.991	-0.530416	0.158083	0.000115341	0.00109527	Smim24
ENSMUSG00000107336	98.5642	-0.531297	0.227487	0.00241893	0.013491	Gm43461
ENSMUSG00000003379	38082.3	-0.531602	0.077146	1.15843e-12	1.20469e-10	Cd79a
ENSMUSG00000025089	6179.69	-0.532431	0.132572	7.73561e-06	0.000110641	Gfra1
ENSMUSG00000040865	381.745	-0.533043	0.147404	4.43112e-05	0.000490431	Ino80d
ENSMUSG00000038393	2244.11	-0.533172	0.120117	1.48079e-06	2.73426e-05	Txnip
ENSMUSG00000024948	8648.18	-0.533311	0.0944126	3.71748e-09	1.6043e-07	Map4k2
ENSMUSG00000087611	92.1181	-0.533488	0.370494	0.0123042	0.049253	4930458D05Rik
ENSMUSG00000025795	1790.59	-0.534974	0.130319	6.1952e-06	9.24968e-05	Rassf3
ENSMUSG00000112980	578.555	-0.534999	0.141853	2.53684e-05	0.000303369	D430020J02Rik
ENSMUSG00000019189	4580.48	-0.536167	0.084609	3.92709e-11	2.9113e-09	Rnf145
ENSMUSG00000021114	5448.82	-0.536434	0.0946599	2.40219e-09	1.11371e-07	Atp6v1d
ENSMUSG00000079505	155.735	-0.537359	0.208357	0.00126882	0.00796	Gm11131
ENSMUSG00000008384	332.638	-0.537599	0.193089	0.000724332	0.00500921	Sertad1
ENSMUSG00000032177	224.759	-0.538138	0.312814	0.0079139	0.0349692	Pde4a
ENSMUSG00000087165	67.8179	-0.539977	0.30906	0.00790203	0.0349374	2010001A14Rik
ENSMUSG00000016382	457.672	-0.540051	0.187743	0.000546633	0.00399114	Pls3
ENSMUSG00000052917	955.922	-0.54031	0.165246	0.000152138	0.00137826	Senp7
ENSMUSG00000037447	4565.11	-0.540473	0.13436	9.61345e-06	0.000133427	Arid5a
ENSMUSG00000040061	1127.75	-0.540786	0.186517	0.000506277	0.0037495	Plcb2
ENSMUSG00000031402	10877.9	-0.541005	0.102862	2.47042e-08	7.95582e-07	Mpp1
ENSMUSG00000041258	446.383	-0.541306	0.203772	0.00103142	0.00673594	Zfp236
ENSMUSG00000030587	57.5636	-0.541558	0.334991	0.00958116	0.0405305	2200002D01Rik
ENSMUSG00000018076	1159.27	-0.541776	0.187448	0.000490841	0.00364963	Med13l
ENSMUSG00000026116	5617.69	-0.543099	0.124482	1.96703e-06	3.46137e-05	Tmem131
ENSMUSG00000032253	5596.54	-0.54338	0.0992028	6.98616e-09	2.74587e-07	Phip
ENSMUSG00000028053	957.988	-0.544098	0.141743	1.85446e-05	0.000233758	Ash1l
ENSMUSG00000047656	89.6412	-0.545748	0.381091	0.0120185	0.0483161	Trpt1
ENSMUSG00000046982	1108.82	-0.54605	0.153767	5.41023e-05	0.000579115	Tshz1
ENSMUSG00000068735	14309.1	-0.54634	0.0941702	1.06334e-09	5.45326e-08	Trp53i11
ENSMUSG00000090290	3821.41	-0.54732	0.185199	0.000445201	0.00336712	Tarbp1
ENSMUSG00000033039	89.449	-0.547422	0.337853	0.0093141	0.0396923	Micall1
ENSMUSG00000045795	625.642	-0.547899	0.134675	7.10911e-06	0.000103429	Whamm
ENSMUSG00000061436	707.138	-0.547973	0.148741	3.33439e-05	0.000382203	Hipk2
ENSMUSG00000007880	1581.24	-0.548535	0.163871	0.000110632	0.00106131	Arid1a
ENSMUSG00000074785	478.662	-0.549002	0.246668	0.00312099	0.0165675	Plxnc1
ENSMUSG00000098243	54.3488	-0.549112	0.277959	0.00508063	0.024662	Gm4258
ENSMUSG00000039942	794.958	-0.549211	0.183479	0.000366985	0.00286977	Ptger4
ENSMUSG00000085347	35.4259	-0.550493	0.352149	0.00996674	0.0417105	Hk1os
ENSMUSG00000038056	658.865	-0.55088	0.196723	0.00062651	0.00445488	Kmt2c
ENSMUSG00000079429	433.461	-0.551647	0.244848	0.00276909	0.0150625	Mroh2a
ENSMUSG00000097047	56.4272	-0.551754	0.332535	0.00867437	0.0375538	1110020A21Rik
ENSMUSG00000000290	2499.43	-0.552119	0.100052	5.40676e-09	2.17651e-07	Itgb2
ENSMUSG00000109715	81.175	-0.552212	0.334907	0.00874564	0.0377968	Gm45606
ENSMUSG00000097048	745.585	-0.552556	0.133734	5.21291e-06	7.98193e-05	1600020E01Rik
ENSMUSG00000048490	806.558	-0.552947	0.196126	0.000579555	0.00417598	Nrip1
ENSMUSG00000029385	7826.63	-0.55457	0.141557	1.1882e-05	0.000159438	Ccng2
ENSMUSG00000026123	2655.29	-0.555286	0.0666657	1.43326e-17	2.94015e-15	Plekhb2
ENSMUSG00000074918	2468.41	-0.555529	0.0949196	7.69279e-10	4.08509e-08	Inafm2
ENSMUSG00000095325	340.776	-0.5564	0.19452	0.000534691	0.00392307	Zfp870
ENSMUSG00000074272	1061.37	-0.557369	0.101019	5.3185e-09	2.15255e-07	Ceacam1
ENSMUSG00000001151	1622.71	-0.557616	0.140188	9.87344e-06	0.000136523	Pcnt
ENSMUSG00000024885	550.858	-0.558285	0.146784	2.01446e-05	0.000250875	Aldh3b1
ENSMUSG00000048440	386.783	-0.559335	0.171993	0.000153858	0.00138964	Cyp4f16
ENSMUSG00000050945	331.689	-0.560212	0.178189	0.00021783	0.00187149	Zfp438
ENSMUSG00000074497	372.656	-0.56048	0.170993	0.000140434	0.00128598	A430078G23Rik
ENSMUSG00000020564	599.172	-0.563547	0.139677	7.76501e-06	0.000110849	Atxn7l1
ENSMUSG00000040415	810.185	-0.56377	0.136335	5.04941e-06	7.76588e-05	Dtx3
ENSMUSG00000056763	1023.88	-0.564975	0.137595	5.56725e-06	8.42968e-05	Cspp1
ENSMUSG00000029060	730.447	-0.565118	0.14561	1.44561e-05	0.000189397	Mib2
ENSMUSG00000030930	771.533	-0.565356	0.201087	0.000587406	0.00422498	Chst15
ENSMUSG00000036882	486.177	-0.565762	0.158096	4.6851e-05	0.000514742	Arhgap33
ENSMUSG00000044629	488.721	-0.566451	0.149567	1.99089e-05	0.000248447	Cnrip1
ENSMUSG00000027580	381.362	-0.567585	0.175106	0.000148116	0.0013459	Helz2
ENSMUSG00000074364	414.333	-0.568606	0.239218	0.00192691	0.0112016	Ehd2
ENSMUSG00000032740	1271.27	-0.568978	0.202002	0.000562371	0.00407494	Ccdc88a
ENSMUSG00000030083	1641.21	-0.569496	0.146772	1.40074e-05	0.000184486	Abtb1
ENSMUSG00000020573	4058.04	-0.570925	0.14455	1.07649e-05	0.00014695	Pik3cg
ENSMUSG00000033318	3004.36	-0.571088	0.140223	6.49492e-06	9.58241e-05	Gstt2
ENSMUSG00000044224	5081.95	-0.571131	0.141921	7.63971e-06	0.000109909	Dnajc21
ENSMUSG00000042594	3080.04	-0.571479	0.115689	1.3579e-07	3.46416e-06	Sh2b3
ENSMUSG00000100975	518.955	-0.57216	0.213925	0.000854361	0.00578916	Gm28875
ENSMUSG00000030921	3468.62	-0.57227	0.10654	1.16981e-08	4.28312e-07	Trim30a
ENSMUSG00000057143	561.111	-0.572461	0.187262	0.000267765	0.00222272	Trim12c
ENSMUSG00000003031	350.584	-0.57255	0.184337	0.000225618	0.00192734	Cdkn1b
ENSMUSG00000038712	806.008	-0.573628	0.162152	5.38164e-05	0.000578121	Mindy1
ENSMUSG00000020883	729.916	-0.574705	0.169133	8.5132e-05	0.000852743	Fbxl20
ENSMUSG00000098183	94.2468	-0.57499	0.357365	0.00853687	0.037098	Gm27010
ENSMUSG00000025656	159.427	-0.576286	0.305225	0.00540809	0.0258576	Arhgef9
ENSMUSG00000027130	1405.52	-0.576675	0.182239	0.000192125	0.00168941	Slc12a6
ENSMUSG00000027993	294.783	-0.57709	0.218182	0.000934527	0.0062281	Trim2
ENSMUSG00000075289	832.888	-0.577379	0.180411	0.000176866	0.00156906	Carns1
ENSMUSG00000092626	89.5062	-0.577594	0.299293	0.00498264	0.0242925	9130230N09Rik
ENSMUSG00000022228	144.697	-0.578674	0.235542	0.00151228	0.00920584	Zscan26
ENSMUSG00000001248	3519.9	-0.57924	0.0999371	9.33239e-10	4.85252e-08	Gramd1a
ENSMUSG00000005442	271.444	-0.580632	0.25826	0.00249405	0.0138379	Cic
ENSMUSG00000026473	1728.6	-0.582576	0.132506	1.38354e-06	2.57372e-05	Glul
ENSMUSG00000021254	860.019	-0.582836	0.153211	1.88386e-05	0.000236867	Gpatch2l
ENSMUSG00000029863	6514.46	-0.582999	0.108682	1.14136e-08	4.19949e-07	Casp2
ENSMUSG00000029771	2381.84	-0.583556	0.105947	4.78664e-09	1.96923e-07	Irf5
ENSMUSG00000027936	1337.32	-0.584554	0.115629	6.06549e-08	1.72028e-06	Crtc2
ENSMUSG00000064065	785.305	-0.585571	0.206685	0.000522263	0.00384319	Ipcef1
ENSMUSG00000021608	2847.31	-0.58583	0.108844	1.02949e-08	3.85568e-07	Lpcat1
ENSMUSG00000023795	293.37	-0.586594	0.172733	8.61724e-05	0.000862012	Pisd-ps2
ENSMUSG00000037426	1426.09	-0.587611	0.141392	4.06938e-06	6.42139e-05	Depdc5
ENSMUSG00000021127	409.166	-0.589281	0.205027	0.000469376	0.00351094	Zfp36l1
ENSMUSG00000078671	479.338	-0.590102	0.227032	0.0010273	0.00671199	Chd2
ENSMUSG00000021819	426.62	-0.591377	0.189687	0.000217197	0.00186712	Zswim8
ENSMUSG00000025404	895.52	-0.592991	0.157957	2.12419e-05	0.000261594	R3hdm2
ENSMUSG00000036944	781.242	-0.592995	0.183706	0.00015309	0.00138521	Tmem71
ENSMUSG00000034471	340.128	-0.593709	0.210781	0.000507923	0.00375798	Caskin2
ENSMUSG00000006307	297.652	-0.593723	0.201279	0.00032985	0.00264046	Kmt2b
ENSMUSG00000004040	3632.08	-0.593897	0.120797	1.1929e-07	3.08528e-06	Stat3
ENSMUSG00000002625	1301.94	-0.593957	0.149554	9.27704e-06	0.000129352	Akap8l
ENSMUSG00000030055	103.436	-0.594587	0.343481	0.00669216	0.0306562	Rab43
ENSMUSG00000026463	475.912	-0.595526	0.230002	0.000996788	0.00654689	Atp2b4
ENSMUSG00000108633	58.7465	-0.59715	0.359905	0.00740711	0.0331778	Gm44694
ENSMUSG00000026987	2091.92	-0.598407	0.111322	1.0534e-08	3.91431e-07	Baz2b
ENSMUSG00000049092	86.0497	-0.598531	0.428244	0.00984636	0.0413225	Gpr137c
ENSMUSG00000026664	2079.48	-0.598713	0.100624	3.70188e-10	2.14037e-08	Phyh
ENSMUSG00000062115	846.445	-0.599374	0.138441	1.94349e-06	3.43204e-05	Rai1
ENSMUSG00000030451	735.298	-0.600301	0.149413	7.6897e-06	0.000110211	Herc2
ENSMUSG00000034401	3322.06	-0.60084	0.112216	1.21728e-08	4.41839e-07	Spata6
ENSMUSG00000002699	355.769	-0.600972	0.278331	0.00287515	0.0155098	Lcp2
ENSMUSG00000037922	371.282	-0.601457	0.165385	3.24121e-05	0.000372789	Bank1
ENSMUSG00000071454	1108.73	-0.602737	0.107485	2.92821e-09	1.32078e-07	Dtnb
ENSMUSG00000034987	501.662	-0.603359	0.184275	0.000125261	0.00117017	Hrh2
ENSMUSG00000028459	3403	-0.60346	0.122912	1.18214e-07	3.07336e-06	Cd72
ENSMUSG00000030924	737.171	-0.605881	0.154185	1.14082e-05	0.000153908	Rexo5
ENSMUSG00000039852	1104.81	-0.606849	0.133971	7.80375e-07	1.56441e-05	Rere
ENSMUSG00000063952	252.84	-0.609528	0.242752	0.00122117	0.00770631	Brpf3
ENSMUSG00000036565	1676.33	-0.609636	0.198011	0.000216087	0.00185973	Ttyh3
ENSMUSG00000024238	739.419	-0.609967	0.193029	0.000180236	0.00159423	Zeb1
ENSMUSG00000040447	153.568	-0.609969	0.404183	0.00775859	0.0344354	Spns2
ENSMUSG00000035364	25.6311	-0.610841	0.459839	0.0106615	0.0440064	4930524J08Rik
ENSMUSG00000010051	29.4054	-0.610895	0.452599	0.0105347	0.0435915	Hyal1
ENSMUSG00000039168	3066.61	-0.611072	0.149303	5.30629e-06	8.08359e-05	Dap
ENSMUSG00000011832	436.96	-0.611133	0.201748	0.000272964	0.00226086	Evi5l
ENSMUSG00000025878	2488.26	-0.611454	0.098383	6.94982e-11	4.90913e-09	Uimc1
ENSMUSG00000042744	368.789	-0.612712	0.224856	0.000662897	0.00466708	Hectd4
ENSMUSG00000036502	1541.14	-0.612783	0.184989	0.000103913	0.00100784	Tmem255a
ENSMUSG00000005533	282.759	-0.613616	0.154628	8.93333e-06	0.000125612	Igf1r
ENSMUSG00000055210	125.262	-0.613775	0.258727	0.00172289	0.0102342	Foxd2
ENSMUSG00000008393	4105.5	-0.614586	0.117754	2.38151e-08	7.70262e-07	Carhsp1
ENSMUSG00000032503	4499.05	-0.614679	0.112345	5.9811e-09	2.3821e-07	Arpp21
ENSMUSG00000029084	819.287	-0.61503	0.217283	0.000483342	0.00360281	Cd38
ENSMUSG00000034751	132.985	-0.616162	0.303658	0.0036484	0.0188721	Mast4
ENSMUSG00000061702	293.227	-0.616936	0.145934	2.96719e-06	4.89357e-05	Tmem91
ENSMUSG00000024334	203.774	-0.617007	0.175702	5.28444e-05	0.000570456	H2-Oa
ENSMUSG00000048731	43.7995	-0.617042	0.378824	0.00725344	0.0326677	Ggnbp1
ENSMUSG00000029178	732.292	-0.617246	0.167353	2.53837e-05	0.000303369	Klf3
ENSMUSG00000041538	4666.75	-0.620606	0.103222	2.04035e-10	1.25223e-08	H2-Ob
ENSMUSG00000037295	1411.8	-0.621367	0.145677	2.48665e-06	4.23636e-05	Ldlrap1
ENSMUSG00000028093	8562.35	-0.621747	0.117647	1.42974e-08	5.08561e-07	Acp6
ENSMUSG00000042444	1693.99	-0.62222	0.138393	8.75524e-07	1.7288e-05	Mindy2
ENSMUSG00000051998	1118.93	-0.622519	0.137965	8.41642e-07	1.66911e-05	Lax1
ENSMUSG00000097636	333.698	-0.622827	0.229171	0.000683386	0.00477095	Mirt1
ENSMUSG00000037594	128.611	-0.623404	0.231708	0.000721619	0.00499595	BC022687
ENSMUSG00000085936	909.751	-0.624751	0.144553	1.90867e-06	3.38395e-05	2610307P16Rik
ENSMUSG00000027550	1936.18	-0.625417	0.167385	2.15852e-05	0.000264922	Lrrcc1
ENSMUSG00000029714	302.94	-0.625482	0.220313	0.000452777	0.00341406	Gigyf1
ENSMUSG00000029923	253.448	-0.625492	0.16297	1.47005e-05	0.000192095	Rab19
ENSMUSG00000097380	92.4981	-0.625801	0.34251	0.00500776	0.0243874	Gm26816
ENSMUSG00000025154	3316.21	-0.626299	0.176058	4.40345e-05	0.000488239	Arhgap19
ENSMUSG00000038175	827.046	-0.626833	0.142701	1.37022e-06	2.55212e-05	Mylip
ENSMUSG00000068551	97.6638	-0.626857	0.314675	0.00378365	0.0194713	Zfp467
ENSMUSG00000020178	564.299	-0.627344	0.197766	0.000160492	0.00144259	Adora2a
ENSMUSG00000022091	97.2138	-0.627834	0.296427	0.00279887	0.0151859	Sorbs3
ENSMUSG00000040557	262.356	-0.628259	0.250451	0.0011652	0.00743773	Mettl27
ENSMUSG00000030035	1442.44	-0.628379	0.153091	4.82483e-06	7.47948e-05	Wbp1
ENSMUSG00000029716	275.099	-0.62874	0.242127	0.000912061	0.00609738	Tfr2
ENSMUSG00000036390	123.373	-0.630216	0.242165	0.000891107	0.00599206	Gadd45a
ENSMUSG00000055538	1283.67	-0.630251	0.206079	0.000236305	0.00200264	Zcchc24
ENSMUSG00000039478	71.9838	-0.630775	0.357053	0.00565879	0.0267912	Micu3
ENSMUSG00000030761	4074.74	-0.630775	0.169457	2.2715e-05	0.000276101	Myo7a
ENSMUSG00000037202	63.0678	-0.632987	0.696765	0.0123348	0.0493319	Prf1
ENSMUSG00000005447	2326.49	-0.633437	0.104368	1.6436e-10	1.05635e-08	Pafah1b3
ENSMUSG00000027463	169.309	-0.634994	0.415003	0.00784145	0.0347413	Slc52a3
ENSMUSG00000031506	9674.75	-0.635492	0.0789382	1.27226e-16	2.29543e-14	Ptpn7
ENSMUSG00000020577	35832.3	-0.635966	0.131463	1.59983e-07	3.99956e-06	Tspan13
ENSMUSG00000096472	6382.01	-0.636005	0.114459	3.48725e-09	1.52695e-07	Cdkn2d
ENSMUSG00000024190	883.542	-0.636598	0.198107	0.00013852	0.00126969	Dusp1
ENSMUSG00000097815	192.281	-0.636607	0.21853	0.000365924	0.00286596	Gm26809
ENSMUSG00000025583	4911.45	-0.636631	0.112058	1.69188e-09	8.1729e-08	Rptor
ENSMUSG00000039577	494.024	-0.637173	0.148422	2.0463e-06	3.57982e-05	Nphp4
ENSMUSG00000021485	3568.88	-0.637741	0.0985421	1.2293e-11	1.01147e-09	Mxd3
ENSMUSG00000024193	134.824	-0.638281	0.274077	0.0017689	0.0104595	Phf1
ENSMUSG00000097233	95.1865	-0.638834	0.297282	0.00251308	0.0139103	Gm17552
ENSMUSG00000057098	17500.9	-0.63926	0.122803	2.05967e-08	6.80873e-07	Ebf1
ENSMUSG00000070315	116.013	-0.640464	0.312058	0.00317538	0.0168026	4930581F22Rik
ENSMUSG00000030047	3265.32	-0.641484	0.112702	1.60362e-09	7.77161e-08	Arhgap25
ENSMUSG00000044340	537.59	-0.641887	0.19919	0.000144022	0.00131268	Phlpp1
ENSMUSG00000047153	1561.06	-0.642176	0.135697	2.58886e-07	6.09083e-06	Khnyn
ENSMUSG00000052656	844.79	-0.644298	0.163664	8.61763e-06	0.000121536	Rnf103
ENSMUSG00000030123	637.435	-0.644579	0.226878	0.000415769	0.00317822	Plxnd1
ENSMUSG00000053541	3245.6	-0.64463	0.174466	2.02389e-05	0.000251725	Gm4759
ENSMUSG00000033488	301.702	-0.644914	0.228371	0.00046718	0.00349801	Cryzl2
ENSMUSG00000032350	5376.46	-0.646054	0.0956404	1.62574e-12	1.62303e-10	Gclc
ENSMUSG00000022297	323.597	-0.647925	0.26232	0.00121154	0.00765843	Fzd6
ENSMUSG00000030934	10026.5	-0.648366	0.083142	8.44031e-16	1.38894e-13	Oat
ENSMUSG00000040093	129.773	-0.648475	0.481071	0.0091061	0.0390057	Bmf
ENSMUSG00000025932	320.348	-0.64984	0.269489	0.00139452	0.00864717	Eya1
ENSMUSG00000061533	1917.06	-0.650763	0.129738	6.48777e-08	1.80584e-06	Cep128
ENSMUSG00000026923	742.161	-0.65099	0.261049	0.00113647	0.00729471	Notch1
ENSMUSG00000039159	2270.57	-0.651069	0.154257	2.74735e-06	4.60197e-05	Ube2h
ENSMUSG00000047712	646.479	-0.651373	0.232242	0.000473087	0.00353517	Ust
ENSMUSG00000034522	466.414	-0.652103	0.16684	1.03265e-05	0.000141741	Zfp395
ENSMUSG00000031431	5098.13	-0.652263	0.154978	3.77319e-06	6.0367e-05	Tsc22d3
ENSMUSG00000025151	2299.89	-0.652461	0.13099	7.26183e-08	2.00269e-06	Maged1
ENSMUSG00000016494	154.224	-0.652487	0.566035	0.0107247	0.0441803	Cd34
ENSMUSG00000001750	5676.29	-0.652665	0.127381	3.82357e-08	1.16853e-06	Tcirg1
ENSMUSG00000027778	1584.43	-0.65294	0.169451	1.26569e-05	0.000168178	Ift80
ENSMUSG00000001521	108.096	-0.654525	0.279523	0.00165152	0.00990051	Tulp3
ENSMUSG00000053411	394.844	-0.654995	0.156882	3.34874e-06	5.45674e-05	Cbx7
ENSMUSG00000048118	2327.83	-0.655761	0.078134	6.12872e-18	1.31111e-15	Arid4a
ENSMUSG00000031166	535.115	-0.658817	0.243481	0.000600567	0.00430105	Wdr13
ENSMUSG00000039713	179.06	-0.65921	0.196953	8.48217e-05	0.000850204	Plekhg5
ENSMUSG00000031453	9955.69	-0.659844	0.0981484	1.94012e-12	1.90168e-10	Rasa3
ENSMUSG00000037921	319.486	-0.660848	0.330646	0.00338408	0.017702	Ddx60
ENSMUSG00000019338	795.568	-0.661062	0.204682	0.000111463	0.00106588	Zfp687
ENSMUSG00000039167	832.296	-0.662587	0.142727	3.86223e-07	8.58113e-06	Adgrl4
ENSMUSG00000035678	115.433	-0.663676	0.341905	0.00368962	0.0190459	Tnfsf9
ENSMUSG00000004665	2472.21	-0.664625	0.113341	4.96788e-10	2.76558e-08	Cnn2
ENSMUSG00000024778	100.093	-0.665058	0.407403	0.00623376	0.0289815	Fas
ENSMUSG00000004815	295.373	-0.665767	0.308236	0.00234994	0.0131947	Dgkq
ENSMUSG00000024219	4705.74	-0.665841	0.139691	2.20529e-07	5.25863e-06	Anks1
ENSMUSG00000000903	24534.2	-0.665863	0.107064	5.84094e-11	4.2052e-09	Vpreb3
ENSMUSG00000059970	770.065	-0.666528	0.134364	7.99671e-08	2.17728e-06	Hspa2
ENSMUSG00000037664	62.3597	-0.666804	0.331089	0.00321869	0.0169778	Cdkn1c
ENSMUSG00000028894	3099.74	-0.668273	0.0790154	2.96005e-18	6.71618e-16	Inpp5b
ENSMUSG00000097141	80.2573	-0.670313	0.242492	0.000519295	0.00382699	Gm10524
ENSMUSG00000048249	414.551	-0.670575	0.262748	0.000968281	0.0063933	Crebrf
ENSMUSG00000002996	1113.65	-0.671097	0.147987	6.35881e-07	1.30622e-05	Hbp1
ENSMUSG00000032741	300.522	-0.671106	0.252408	0.000693742	0.0048365	Tpcn1
ENSMUSG00000025017	9256.91	-0.672033	0.115453	7.02689e-10	3.84043e-08	Pik3ap1
ENSMUSG00000040389	436.416	-0.672879	0.23687	0.000413649	0.00316363	Wdr47
ENSMUSG00000038976	291.53	-0.67374	0.240457	0.000485775	0.00361554	Ppp1r9b
ENSMUSG00000068566	804.56	-0.674602	0.183458	2.35829e-05	0.000283967	Myadm
ENSMUSG00000025867	2503.61	-0.677867	0.174117	1.03131e-05	0.000141741	Cplx2
ENSMUSG00000103865	1386.97	-0.678602	0.148294	4.92376e-07	1.05484e-05	Gm37416
ENSMUSG00000044770	535.572	-0.67909	0.20121	6.80485e-05	0.000703135	Scml4
ENSMUSG00000022831	5775.09	-0.679287	0.0969236	2.84334e-13	3.29771e-11	Hcls1
ENSMUSG00000026885	992.293	-0.679556	0.165872	4.42766e-06	6.91389e-05	Ttll11
ENSMUSG00000039853	591.79	-0.680925	0.138632	9.88587e-08	2.62484e-06	Trim14
ENSMUSG00000028551	4081.28	-0.682187	0.124755	4.38153e-09	1.84263e-07	Cdkn2c
ENSMUSG00000045441	335.727	-0.682217	0.180519	1.60899e-05	0.000207533	Gprin3
ENSMUSG00000042207	749.742	-0.682287	0.260922	0.000771106	0.00528965	Kdm5b
ENSMUSG00000033671	731.759	-0.685404	0.25399	0.000599747	0.00429723	Cep350
ENSMUSG00000039824	47.2475	-0.685545	0.338406	0.00302986	0.0161697	Myl6b
ENSMUSG00000006356	762.989	-0.685816	0.153781	8.89337e-07	1.75004e-05	Crip2
ENSMUSG00000008193	3392.03	-0.687139	0.149692	4.62135e-07	1.00007e-05	Spib
ENSMUSG00000001156	419.803	-0.687339	0.214347	0.000127465	0.00118558	Mxd1
ENSMUSG00000000127	182.497	-0.687883	0.280553	0.00115009	0.00735454	Fer
ENSMUSG00000020227	1342.35	-0.688604	0.096113	9.40795e-14	1.19393e-11	Irak3
ENSMUSG00000043279	238.662	-0.688845	0.22633	0.00021536	0.00185773	Trim56
ENSMUSG00000034035	134.137	-0.689231	0.258894	0.000668559	0.00470031	Ccdc17
ENSMUSG00000079491	848.181	-0.690698	0.148624	3.60554e-07	8.08279e-06	H2-T10
ENSMUSG00000052087	652.017	-0.690704	0.0984745	2.51165e-13	2.98508e-11	Rgs14
ENSMUSG00000079685	1057.15	-0.691943	0.206012	7.05711e-05	0.000726325	Ulbp1
ENSMUSG00000040158	637.393	-0.692707	0.156641	1.06033e-06	2.03457e-05	Tax1bp3
ENSMUSG00000026358	31.5836	-0.696271	0.871921	0.0101615	0.0423514	Rgs1
ENSMUSG00000038967	521.155	-0.697837	0.202834	5.62749e-05	0.000599648	Pdk2
ENSMUSG00000051498	126.658	-0.698042	0.391131	0.00450166	0.0224409	Tlr6
ENSMUSG00000029364	471.996	-0.698279	0.198544	4.12976e-05	0.000461861	Wsb2
ENSMUSG00000032280	2044.97	-0.698368	0.160043	1.32077e-06	2.47232e-05	Tle3
ENSMUSG00000021203	1424.05	-0.698566	0.156971	9.06893e-07	1.77526e-05	Otub2
ENSMUSG00000036611	459.922	-0.69929	0.182631	1.27549e-05	0.000169181	Eepd1
ENSMUSG00000022656	297.173	-0.699706	0.256592	0.000540625	0.00395877	Nectin3
ENSMUSG00000022565	372.678	-0.70001	0.192404	2.59541e-05	0.000307974	Plec
ENSMUSG00000071669	203	-0.700423	0.321842	0.00218341	0.0123991	Snx29
ENSMUSG00000022353	926.513	-0.701107	0.10871	1.22366e-11	1.01147e-09	Mtss1
ENSMUSG00000034427	99.0745	-0.701346	0.463435	0.00646591	0.0298732	Myo15b
ENSMUSG00000031785	43209.2	-0.702352	0.103158	7.02366e-13	7.67732e-11	Adgrg1
ENSMUSG00000052155	308.94	-0.702512	0.185716	1.54657e-05	0.000200692	Acvr2a
ENSMUSG00000030742	669.352	-0.703113	0.143107	9.47052e-08	2.53252e-06	Lat
ENSMUSG00000038507	1020.59	-0.703164	0.143531	9.99215e-08	2.64836e-06	Parp12
ENSMUSG00000029304	264.337	-0.704162	0.206931	6.00217e-05	0.000635212	Spp1
ENSMUSG00000019768	834.23	-0.705476	0.261042	0.000615676	0.00439035	Esr1
ENSMUSG00000062031	1200.99	-0.705655	0.11615	1.36647e-10	8.85838e-09	Pgghg
ENSMUSG00000063382	184.667	-0.706613	0.251435	0.000423486	0.00322568	Bcl9l
ENSMUSG00000024985	1135.14	-0.708041	0.162592	1.35832e-06	2.5331e-05	Tcf7l2
ENSMUSG00000078452	261.914	-0.709914	0.238369	0.000251377	0.00211363	Raet1d
ENSMUSG00000040209	522.407	-0.70992	0.145685	1.10233e-07	2.88387e-06	Zfp704
ENSMUSG00000022639	103.803	-0.71129	0.41431	0.00469237	0.0231985	Dubr
ENSMUSG00000018931	829.435	-0.711406	0.149106	1.88621e-07	4.57795e-06	Natd1
ENSMUSG00000030060	2698.95	-0.711732	0.093311	2.54279e-15	3.96649e-13	Hmces
ENSMUSG00000041750	227.076	-0.712139	0.198725	3.14979e-05	0.000365078	Cd1d2
ENSMUSG00000003847	289.854	-0.712673	0.36255	0.00320771	0.0169279	Nfat5
ENSMUSG00000036273	540.627	-0.713377	0.216226	7.95779e-05	0.000802477	Lrrk2
ENSMUSG00000027985	11996.6	-0.713567	0.112327	2.18048e-11	1.67449e-09	Lef1
ENSMUSG00000036948	575.66	-0.714235	0.1517	2.59089e-07	6.09083e-06	BC037034
ENSMUSG00000028211	3660.21	-0.716399	0.231837	0.000148423	0.00134787	Trp53inp1
ENSMUSG00000070780	112.869	-0.717166	0.318603	0.00173943	0.010316	Rbm47
ENSMUSG00000021338	138.096	-0.721872	0.606377	0.00830594	0.036346	Carmil1
ENSMUSG00000003546	758.481	-0.723605	0.176654	3.87144e-06	6.15444e-05	Klc4
ENSMUSG00000025268	736.731	-0.725244	0.115253	3.6044e-11	2.69495e-09	Maged2
ENSMUSG00000003484	951.3	-0.725512	0.22884	0.000132777	0.00122586	Cyp4f18
ENSMUSG00000021990	1876.98	-0.725743	0.199605	2.57429e-05	0.000306439	Spata13
ENSMUSG00000060012	342.23	-0.726128	0.239571	0.000202165	0.00176321	Kif13b
ENSMUSG00000030287	770.758	-0.728761	0.196702	1.9654e-05	0.00024547	Itpr2
ENSMUSG00000033467	360.55	-0.730389	0.184875	7.36333e-06	0.000106743	Crlf2
ENSMUSG00000040296	929.04	-0.730614	0.170627	2.18696e-06	3.7861e-05	Ddx58
ENSMUSG00000052684	302.065	-0.733118	0.266536	0.000465401	0.00348818	Jun
ENSMUSG00000078429	2406.44	-0.733142	0.146371	5.20995e-08	1.52679e-06	Ctdsp2
ENSMUSG00000046402	295.895	-0.734092	0.188582	8.9141e-06	0.000125459	Rbp1
ENSMUSG00000022048	2756.92	-0.734493	0.0838828	2.01661e-19	5.69787e-17	Dpysl2
ENSMUSG00000044167	5680.77	-0.734883	0.0795738	2.87629e-21	1.05055e-18	Foxo1
ENSMUSG00000028565	63.5129	-0.736923	0.430166	0.00449273	0.0224113	Nfia
ENSMUSG00000043243	2379.07	-0.737289	0.14348	2.85104e-08	9.00723e-07	Fam129c
ENSMUSG00000046985	13148.2	-0.737525	0.101348	3.42345e-14	4.66057e-12	Tapt1
ENSMUSG00000032913	820.447	-0.737966	0.244038	0.000203834	0.00177485	Lrig2
ENSMUSG00000000078	1217.06	-0.740155	0.130292	1.34167e-09	6.63086e-08	Klf6
ENSMUSG00000106086	81.6857	-0.742356	0.339342	0.00192125	0.0111731	Gm43352
ENSMUSG00000015291	5174.86	-0.750261	0.135524	3.10342e-09	1.38727e-07	Gdi1
ENSMUSG00000039770	1680.93	-0.751202	0.135205	2.78956e-09	1.26972e-07	Ypel5
ENSMUSG00000024978	3172.36	-0.752797	0.231607	9.55653e-05	0.000939489	Gpam
ENSMUSG00000039158	4983.03	-0.753233	0.138678	5.39392e-09	2.17651e-07	Akna
ENSMUSG00000034614	2311.27	-0.753768	0.125138	1.77942e-10	1.12434e-08	Pik3ip1
ENSMUSG00000111422	1386.67	-0.754297	0.14773	3.13868e-08	9.75818e-07	1700027J07Rik
ENSMUSG00000087269	106.1	-0.754913	0.291383	0.000690008	0.0048127	D330023K18Rik
ENSMUSG00000029314	3630.65	-0.756145	0.122068	5.50976e-11	3.98593e-09	Gpat3
ENSMUSG00000016194	265.564	-0.757588	0.272977	0.000399314	0.00308075	Hsd11b1
ENSMUSG00000074071	132.201	-0.759656	0.320409	0.00114582	0.00733901	Fam169b
ENSMUSG00000036718	105.595	-0.760008	0.289504	0.000631231	0.0044757	Micall2
ENSMUSG00000055692	171.388	-0.760603	0.237645	0.000110779	0.00106204	Tmem191c
ENSMUSG00000032715	525.624	-0.760884	0.213792	3.23006e-05	0.000371966	Trib3
ENSMUSG00000019872	824.106	-0.761144	0.174919	1.13754e-06	2.17335e-05	Smpdl3a
ENSMUSG00000109684	372.371	-0.762499	0.205498	1.77916e-05	0.000226363	Gm45745
ENSMUSG00000037552	1041.97	-0.765589	0.170825	6.18195e-07	1.27708e-05	Plekhg2
ENSMUSG00000017417	2277.76	-0.767139	0.118872	1.08644e-11	9.10916e-10	Plxdc1
ENSMUSG00000039153	91.9134	-0.767277	0.273823	0.000374645	0.002919	Runx2
ENSMUSG00000030217	1442.03	-0.767486	0.120717	2.15622e-11	1.67302e-09	Art4
ENSMUSG00000031012	200.566	-0.768374	0.299282	0.000729603	0.00503576	Cask
ENSMUSG00000042073	55.8648	-0.768903	0.385764	0.00251037	0.0139027	Abhd14b
ENSMUSG00000029275	1181.1	-0.769315	0.153985	5.59496e-08	1.61435e-06	Gfi1
ENSMUSG00000030583	225.259	-0.769889	0.232124	6.80832e-05	0.000703135	Sipa1l3
ENSMUSG00000082286	1513.39	-0.770276	0.165485	2.92621e-07	6.78144e-06	Pisd-ps1
ENSMUSG00000033713	2589.98	-0.770521	0.11541	2.26875e-12	2.20613e-10	Foxn3
ENSMUSG00000001053	2907.45	-0.771184	0.140229	3.53236e-09	1.53852e-07	N4bp3
ENSMUSG00000029516	1175.81	-0.773736	0.128793	1.83986e-10	1.1528e-08	Cit
ENSMUSG00000033114	176.167	-0.774167	0.30161	0.000705934	0.00490551	Slc35d2
ENSMUSG00000048924	945.201	-0.775287	0.155402	5.47867e-08	1.59307e-06	Ccdc125
ENSMUSG00000020160	482.394	-0.776481	0.146872	1.16141e-08	4.26277e-07	Meis1
ENSMUSG00000052609	494.9	-0.777082	0.18508	2.31037e-06	3.96763e-05	Plekhg3
ENSMUSG00000086862	29.2987	-0.780866	1.03061	0.00908512	0.0389492	Gm13546
ENSMUSG00000025747	12754.4	-0.781533	0.0768538	2.86301e-25	1.5312e-22	Tyms
ENSMUSG00000092341	1622.96	-0.781594	0.243688	0.000104229	0.00101024	Malat1
ENSMUSG00000021466	585.224	-0.782641	0.249313	0.000131521	0.00121726	Ptch1
ENSMUSG00000087272	38.915	-0.782682	0.457605	0.00431258	0.0216933	Gm15409
ENSMUSG00000045362	814.113	-0.782802	0.168075	2.91908e-07	6.77723e-06	Tnfrsf26
ENSMUSG00000107730	82.043	-0.7847	0.286195	0.000437378	0.00331632	Gm44238
ENSMUSG00000029338	502.28	-0.786273	0.157672	5.68622e-08	1.63438e-06	Antxr2
ENSMUSG00000024851	1809.75	-0.787233	0.156923	4.86921e-08	1.44675e-06	Pitpnm1
ENSMUSG00000032298	1445.07	-0.789238	0.153609	1.95222e-08	6.49655e-07	Neil1
ENSMUSG00000056498	788.856	-0.791116	0.171836	3.13719e-07	7.1944e-06	Tmem154
ENSMUSG00000054619	566.643	-0.791264	0.154339	2.68395e-08	8.56977e-07	Mettl7a1
ENSMUSG00000047881	937.186	-0.791766	0.113435	2.75387e-13	3.22181e-11	Rell1
ENSMUSG00000043263	10177.8	-0.792114	0.146551	4.78135e-09	1.96923e-07	Ifi209
ENSMUSG00000027940	30410.2	-0.792222	0.0561445	8.14939e-47	1.52546e-43	Tpm3
ENSMUSG00000037788	445.312	-0.793521	0.159846	6.23948e-08	1.75963e-06	Vopp1
ENSMUSG00000030677	17265.4	-0.795371	0.0875159	6.56391e-21	2.18432e-18	Kif22
ENSMUSG00000031840	285.077	-0.796418	0.170533	2.69748e-07	6.30183e-06	Rab3a
ENSMUSG00000026200	551.095	-0.796976	0.242276	7.61592e-05	0.00077296	Glb1l
ENSMUSG00000038855	675.92	-0.797513	0.156269	2.81688e-08	8.93703e-07	Itpkb
ENSMUSG00000020758	170.143	-0.801744	0.41273	0.00278284	0.0151154	Itgb4
ENSMUSG00000023055	798.34	-0.801801	0.191639	2.29497e-06	3.95026e-05	Calcoco1
ENSMUSG00000073437	479.568	-0.804225	0.270786	0.000207864	0.00180345	D330041H03Rik
ENSMUSG00000026436	1459.31	-0.805571	0.200908	4.97383e-06	7.67867e-05	Elk4
ENSMUSG00000022429	86.9187	-0.809094	0.348789	0.00116466	0.00743741	Dmc1
ENSMUSG00000032743	297.867	-0.809138	0.302804	0.000398361	0.00307498	D430042O09Rik
ENSMUSG00000047242	652.978	-0.810487	0.148404	4.26662e-09	1.79979e-07	Taf9b
ENSMUSG00000033542	172.522	-0.813036	0.364589	0.00137762	0.00855654	Arhgef5
ENSMUSG00000039264	474.816	-0.813037	0.214422	1.12417e-05	0.000152348	Gimap3
ENSMUSG00000031822	837.569	-0.813182	0.201056	4.13987e-06	6.51889e-05	Gse1
ENSMUSG00000101316	72.7892	-0.813195	0.258727	0.000123232	0.00115555	Gm12663
ENSMUSG00000116380	227.698	-0.815938	0.185352	9.36724e-07	1.82175e-05	AC139671.1
ENSMUSG00000046688	25093.7	-0.819157	0.128912	9.9502e-12	8.51453e-10	Tifa
ENSMUSG00000028101	776.494	-0.819598	0.164469	5.42557e-08	1.5807e-06	Pias3
ENSMUSG00000037234	792.907	-0.827059	0.162946	3.16665e-08	9.81791e-07	Hook3
ENSMUSG00000062939	1131.04	-0.828494	0.101387	2.71288e-17	5.41671e-15	Stat4
ENSMUSG00000021596	947.223	-0.829295	0.149027	2.30075e-09	1.08005e-07	Mctp1
ENSMUSG00000027215	1051.31	-0.830083	0.120707	5.63051e-13	6.33962e-11	Cd82
ENSMUSG00000022179	278.076	-0.830841	0.168787	7.34227e-08	2.01744e-06	4931414P19Rik
ENSMUSG00000002028	840.961	-0.831962	0.189607	9.09089e-07	1.77723e-05	Kmt2a
ENSMUSG00000070501	559.356	-0.835369	0.19211	1.0387e-06	1.99672e-05	Ifi214
ENSMUSG00000004552	786.455	-0.836629	0.15848	1.12569e-08	4.15202e-07	Ctse
ENSMUSG00000001552	245.782	-0.836725	0.230727	2.17325e-05	0.000266103	Jup
ENSMUSG00000028923	2595.52	-0.837705	0.100144	5.88512e-18	1.27724e-15	Necap2
ENSMUSG00000028460	1566.03	-0.83877	0.157175	8.2727e-09	3.18467e-07	Sit1
ENSMUSG00000020143	5612.1	-0.839917	0.16754	5.15243e-08	1.51587e-06	Dock2
ENSMUSG00000044927	43.0584	-0.84266	0.343198	0.00084211	0.00571909	H1fx
ENSMUSG00000059981	1091.53	-0.843455	0.28319	0.000194504	0.00170532	Taok2
ENSMUSG00000040669	1053.58	-0.844151	0.131424	1.17082e-11	9.74055e-10	Phc1
ENSMUSG00000024866	624.311	-0.845238	0.163135	1.86672e-08	6.25373e-07	Acy3
ENSMUSG00000114709	64.5491	-0.846506	0.321743	0.000538615	0.003948	Gm47920
ENSMUSG00000028678	6639.4	-0.847499	0.0847621	1.32598e-24	6.40532e-22	Kif2c
ENSMUSG00000112082	456.305	-0.847762	0.148257	9.31193e-10	4.85252e-08	Gm35035
ENSMUSG00000116987	36.8243	-0.848362	0.42559	0.00242574	0.0135139	AC150035.3
ENSMUSG00000031925	280.518	-0.848477	0.265068	9.60289e-05	0.000942355	Maml2
ENSMUSG00000022237	913.2	-0.848533	0.204147	2.37967e-06	4.07729e-05	Ankrd33b
ENSMUSG00000043448	95.3097	-0.848914	0.381975	0.00144857	0.00889848	Gjc2
ENSMUSG00000054065	709.463	-0.849037	0.17623	1.20329e-07	3.10678e-06	Pkp3
ENSMUSG00000080021	25.423	-0.849911	0.545389	0.00479943	0.0236183	Gm5915
ENSMUSG00000005534	231.454	-0.852363	0.239231	2.67885e-05	0.000315043	Insr
ENSMUSG00000024055	247.243	-0.854832	0.228075	1.2775e-05	0.000169297	Cyp4f13
ENSMUSG00000024109	45.0307	-0.855248	0.531498	0.00418733	0.0211842	Nrxn1
ENSMUSG00000057137	81.7713	-0.856618	0.461227	0.0029535	0.0158356	Tmem140
ENSMUSG00000070427	59.6883	-0.85785	0.682489	0.00647568	0.0298931	Il18bp
ENSMUSG00000032053	16889.2	-0.857908	0.08024	1.28302e-27	8.00548e-25	Pou2af1
ENSMUSG00000045679	3823.49	-0.859971	0.15707	4.16741e-09	1.76291e-07	Pqlc3
ENSMUSG00000039934	436.643	-0.860651	0.200631	1.34806e-06	2.5171e-05	Gsap
ENSMUSG00000008540	1306.68	-0.861196	0.169193	2.94973e-08	9.23223e-07	Mgst1
ENSMUSG00000070808	197.525	-0.863665	0.2643	7.37258e-05	0.000753613	Bicra
ENSMUSG00000028766	5573.49	-0.863678	0.116615	9.74501e-15	1.41681e-12	Alpl
ENSMUSG00000023800	201.783	-0.864292	0.26899	9.18142e-05	0.000910542	Tiam2
ENSMUSG00000028378	5862.11	-0.867398	0.11943	4.03152e-14	5.43892e-12	Ptgr1
ENSMUSG00000110773	21.4202	-0.869248	0.662753	0.00603644	0.028284	AC061963.1
ENSMUSG00000040387	64.5238	-0.870665	0.717422	0.00617528	0.0287994	Klhl32
ENSMUSG00000097705	609.023	-0.871616	0.136994	1.5911e-11	1.27416e-09	Gm26740
ENSMUSG00000024842	114.345	-0.873076	0.31012	0.00030508	0.0024695	Cabp4
ENSMUSG00000022602	608.237	-0.876165	0.18034	8.87805e-08	2.39117e-06	Arc
ENSMUSG00000108617	48.4022	-0.876905	0.374774	0.00104251	0.00679081	Gm31749
ENSMUSG00000027931	43.2319	-0.877571	0.318379	0.000363098	0.00284979	Npr1
ENSMUSG00000049717	953.088	-0.87965	0.131787	1.92706e-12	1.90168e-10	Lig4
ENSMUSG00000023963	188.217	-0.885301	0.260497	4.12552e-05	0.000461732	Cyp39a1
ENSMUSG00000015224	958.901	-0.885506	0.148339	1.95043e-10	1.21193e-08	Cyp2j9
ENSMUSG00000032515	1439.35	-0.887456	0.129951	9.35775e-13	9.97235e-11	Csrnp1
ENSMUSG00000086938	147.726	-0.887968	0.277434	9.33278e-05	0.000921281	4930481A15Rik
ENSMUSG00000071176	249.425	-0.889263	0.247525	2.34708e-05	0.000282991	Arhgef10
ENSMUSG00000072772	80.4129	-0.889538	0.24131	1.66506e-05	0.000213114	Grcc10
ENSMUSG00000032187	35374.2	-0.89386	0.126575	2.08273e-13	2.59907e-11	Smarca4
ENSMUSG00000085784	126.157	-0.894835	0.338946	0.000494277	0.00367335	Gm12158
ENSMUSG00000030579	124.082	-0.896029	0.614478	0.0047598	0.0234622	Tyrobp
ENSMUSG00000026383	367.634	-0.896445	0.268025	5.16441e-05	0.000559602	Epb41l5
ENSMUSG00000103957	28.8916	-0.896566	0.487355	0.00271167	0.0148419	Gm10766
ENSMUSG00000035891	4644.01	-0.896887	0.139608	1.05719e-11	8.94427e-10	Cerk
ENSMUSG00000042671	186.383	-0.897273	0.341913	0.000448357	0.00338756	Rgs8
ENSMUSG00000035711	3151.4	-0.899554	0.153202	3.3173e-10	1.94049e-08	Dok3
ENSMUSG00000041231	837.793	-0.902867	0.167929	5.8927e-09	2.35315e-07	Ublcp1
ENSMUSG00000110195	53.8847	-0.903157	0.378811	0.000913285	0.00610283	Pde2a
ENSMUSG00000028397	1377.86	-0.903333	0.165805	3.14456e-09	1.40148e-07	Kdm4c
ENSMUSG00000000782	421.667	-0.903512	0.223657	3.58213e-06	5.78666e-05	Tcf7
ENSMUSG00000028073	808.588	-0.904301	0.215485	1.68738e-06	3.05176e-05	Pear1
ENSMUSG00000032554	27.6946	-0.906288	0.574576	0.00449475	0.0224139	Trf
ENSMUSG00000028525	4696.76	-0.907473	0.107082	1.95589e-18	4.64911e-16	Pde4b
ENSMUSG00000096210	5195.2	-0.910088	0.127326	6.62257e-14	8.62373e-12	H1f0
ENSMUSG00000033004	1125.29	-0.915686	0.17103	6.2459e-09	2.4744e-07	Mycbp2
ENSMUSG00000032558	180.922	-0.919629	0.344304	0.000425384	0.00323707	Nphp3
ENSMUSG00000086763	139.229	-0.921118	0.327108	0.000292795	0.00238943	Plxna4os1
ENSMUSG00000075312	53.2388	-0.925875	0.328614	0.000293659	0.00239518	Gm13597
ENSMUSG00000103088	129.361	-0.934961	0.485859	0.00235904	0.013229	Pcdhgb6
ENSMUSG00000075702	378.033	-0.935375	0.189165	5.68158e-08	1.63438e-06	Selenom
ENSMUSG00000037754	2966.34	-0.939907	0.142768	3.52332e-12	3.29761e-10	Ppp1r16b
ENSMUSG00000028517	472.456	-0.942283	0.151951	4.29661e-11	3.13862e-09	Plpp3
ENSMUSG00000032596	3186.67	-0.9467	0.116308	3.22882e-17	6.36206e-15	Uba7
ENSMUSG00000038070	861.312	-0.956102	0.141894	1.27866e-12	1.32055e-10	Cntln
ENSMUSG00000033255	134.733	-0.957375	0.261331	1.62859e-05	0.00020952	Gm5134
ENSMUSG00000106219	216.497	-0.957684	0.223787	1.21666e-06	2.29464e-05	5830416I19Rik
ENSMUSG00000079853	61.2232	-0.959327	0.485355	0.00205437	0.0118096	Klra1
ENSMUSG00000022824	341.52	-0.960147	0.214821	5.52538e-07	1.15886e-05	Muc13
ENSMUSG00000002227	1341.24	-0.961391	0.113245	1.317e-18	3.18099e-16	Mov10
ENSMUSG00000006344	88.9908	-0.967794	0.437152	0.00117863	0.00750425	Ggt5
ENSMUSG00000021123	1133.48	-0.968602	0.126903	1.59007e-15	2.50645e-13	Rdh12
ENSMUSG00000020034	1562.09	-0.968651	0.165778	4.41889e-10	2.47839e-08	Tcp11l2
ENSMUSG00000074794	1116	-0.969046	0.171699	1.27943e-09	6.38649e-08	Arrdc3
ENSMUSG00000030708	245.155	-0.969464	0.207371	2.06119e-07	4.95447e-06	Dnajb13
ENSMUSG00000031766	679.519	-0.977969	0.25875	9.25886e-06	0.000129219	Slc12a3
ENSMUSG00000085417	825.753	-0.980367	0.140803	2.39008e-13	2.88641e-11	Gm13919
ENSMUSG00000057069	818.934	-0.982657	0.153832	1.3297e-11	1.08219e-09	Ero1lb
ENSMUSG00000020423	3189.21	-0.983108	0.153267	1.02336e-11	8.70731e-10	Btg2
ENSMUSG00000043336	565.333	-0.985788	0.176494	1.74918e-09	8.39552e-08	Filip1l
ENSMUSG00000028270	1124.2	-0.985804	0.141371	2.21413e-13	2.71775e-11	Gbp2
ENSMUSG00000048120	1439.9	-0.985961	0.177845	2.1125e-09	1.0011e-07	Entpd1
ENSMUSG00000037235	586.382	-0.991867	0.236297	1.62976e-06	2.95826e-05	Mxd4
ENSMUSG00000101223	83.5627	-0.997857	0.239086	1.97063e-06	3.46364e-05	4930568A12Rik
ENSMUSG00000020888	1592.07	-0.998995	0.121937	1.98138e-17	4.00962e-15	Dvl2
ENSMUSG00000064373	4455.91	-1.00091	0.140064	6.76708e-14	8.73595e-12	Selenop
ENSMUSG00000055116	15449.4	-1.00179	0.144161	2.43425e-13	2.91623e-11	Arntl
ENSMUSG00000024754	230.147	-1.00416	0.312433	7.59542e-05	0.000771652	Tmem2
ENSMUSG00000005268	140.043	-1.00655	0.282452	2.27992e-05	0.000276676	Prlr
ENSMUSG00000020437	3687.25	-1.00719	0.119197	2.38482e-18	5.58011e-16	Myo1g
ENSMUSG00000029650	109.923	-1.01417	0.546975	0.00233221	0.0131198	Slc46a3
ENSMUSG00000000058	1051.34	-1.02234	0.226459	3.93257e-07	8.6987e-06	Cav2
ENSMUSG00000020432	988.148	-1.02483	0.165325	3.95121e-11	2.91474e-09	Tcn2
ENSMUSG00000043004	625.685	-1.02796	0.133522	1.05973e-15	1.72494e-13	Gng2
ENSMUSG00000079339	368.165	-1.03221	0.237553	7.87753e-07	1.57709e-05	Ifit1bl1
ENSMUSG00000029299	328.814	-1.03257	0.232972	5.80953e-07	1.21167e-05	Abcg3
ENSMUSG00000033792	343.393	-1.03488	0.320437	6.42869e-05	0.000671594	Atp7a
ENSMUSG00000110902	92.2776	-1.04261	0.232537	4.89743e-07	1.0507e-05	Gm33104
ENSMUSG00000046997	158.416	-1.04393	0.317222	5.40286e-05	0.000579088	Spsb4
ENSMUSG00000028439	63.1458	-1.04423	0.36187	0.000214393	0.00185076	Fam219a
ENSMUSG00000004631	285.527	-1.04854	0.224213	1.80124e-07	4.42189e-06	Sgce
ENSMUSG00000025504	227.493	-1.04857	0.311575	4.40475e-05	0.000488239	Eps8l2
ENSMUSG00000020053	61.5336	-1.05549	0.527954	0.00177427	0.0104812	Igf1
ENSMUSG00000039109	1318.97	-1.05559	0.214207	5.39766e-08	1.57563e-06	F13a1
ENSMUSG00000036356	1307.01	-1.05612	0.175843	1.27332e-10	8.29041e-09	Csgalnact1
ENSMUSG00000025357	2819.25	-1.0607	0.143497	1.08023e-14	1.54609e-12	Dgka
ENSMUSG00000024774	115.846	-1.0628	0.339982	8.46193e-05	0.000849313	Ankrd22
ENSMUSG00000045672	139.261	-1.06285	0.378567	0.000232548	0.00197864	Col27a1
ENSMUSG00000019866	525.615	-1.06362	0.239186	5.51396e-07	1.15809e-05	Crybg1
ENSMUSG00000021703	1496.79	-1.0657	0.20686	1.72552e-08	5.84607e-07	Serinc5
ENSMUSG00000033066	615.212	-1.06918	0.228567	1.85631e-07	4.53479e-06	Gas7
ENSMUSG00000019970	3553.33	-1.0711	0.165235	4.84761e-12	4.45355e-10	Sgk1
ENSMUSG00000058126	1757.88	-1.07494	0.0909178	2.17334e-33	2.03411e-30	Tpm3-rs7
ENSMUSG00000059810	444.426	-1.07733	0.249381	9.71537e-07	1.88456e-05	Rgs3
ENSMUSG00000079470	193.406	-1.08226	0.223857	8.86712e-08	2.39117e-06	Utp14b
ENSMUSG00000023008	1215.52	-1.08368	0.169111	1.08884e-11	9.10916e-10	Fmnl3
ENSMUSG00000072621	363.683	-1.08425	0.224235	7.63366e-08	2.08735e-06	Slfn10-ps
ENSMUSG00000019820	1281.24	-1.09018	0.135818	6.90253e-17	1.30842e-14	Utrn
ENSMUSG00000026311	289.893	-1.09339	0.260454	1.49141e-06	2.74709e-05	Asb1
ENSMUSG00000042613	2022.01	-1.09362	0.18114	1.21533e-10	8.01741e-09	Pbxip1
ENSMUSG00000066621	1374	-1.09395	0.138953	2.39899e-16	4.1293e-14	Tecpr1
ENSMUSG00000074813	28.6532	-1.09523	0.571146	0.00188226	0.0109863	Gm14005
ENSMUSG00000025006	322.926	-1.10007	0.164282	1.49982e-12	1.50737e-10	Sorbs1
ENSMUSG00000043987	2451.32	-1.10146	0.105757	1.47785e-26	8.85233e-24	Cep164
ENSMUSG00000017756	1846.18	-1.12991	0.157167	2.97132e-14	4.08216e-12	Slc12a7
ENSMUSG00000037972	3770.59	-1.1393	0.124329	3.4124e-21	1.18839e-18	Snn
ENSMUSG00000116409	710.478	-1.14243	0.176189	5.00516e-12	4.57026e-10	AL611986.1
ENSMUSG00000025538	524.378	-1.14383	0.145492	2.49091e-16	4.2388e-14	Sumf2
ENSMUSG00000042675	3816.77	-1.14955	0.160016	4.48955e-14	6.00276e-12	Ypel3
ENSMUSG00000000958	368.275	-1.15245	0.221247	1.18031e-08	4.311e-07	Slc7a7
ENSMUSG00000025324	1470.94	-1.15721	0.208469	1.78325e-09	8.53166e-08	Atp10a
ENSMUSG00000107061	237.538	-1.16975	0.22401	1.11494e-08	4.12253e-07	Gm19590
ENSMUSG00000043773	2153.82	-1.17038	0.132273	7.4041e-20	2.17405e-17	1700048O20Rik
ENSMUSG00000022246	376.099	-1.17543	0.262381	4.28021e-07	9.34898e-06	Rai14
ENSMUSG00000103168	1379.03	-1.17809	0.174895	9.65419e-13	1.01811e-10	Gm30948
ENSMUSG00000097779	660.738	-1.18513	0.115364	7.50612e-26	4.32324e-23	4833407H14Rik
ENSMUSG00000037032	594.799	-1.18519	0.220223	4.58164e-09	1.90056e-07	Apbb1
ENSMUSG00000030772	193.153	-1.19285	0.339192	2.34614e-05	0.000282991	Dkk3
ENSMUSG00000014542	198.047	-1.19679	0.272923	6.24484e-07	1.28633e-05	Clec4f
ENSMUSG00000029798	462.29	-1.19841	0.207008	4.41278e-10	2.47839e-08	Herc6
ENSMUSG00000039298	1471.74	-1.20075	0.128894	8.38447e-22	3.13894e-19	Cdk5rap2
ENSMUSG00000019832	549.548	-1.20145	0.215527	1.12301e-09	5.7007e-08	Rab32
ENSMUSG00000052572	1760.86	-1.20762	0.132484	5.33618e-21	1.81612e-18	Dlg2
ENSMUSG00000027474	167.063	-1.2077	0.270776	4.28274e-07	9.34898e-06	Ccm2l
ENSMUSG00000026672	225.553	-1.20889	0.272821	5.35336e-07	1.12907e-05	Optn
ENSMUSG00000026090	568.223	-1.2219	0.268835	3.3925e-07	7.72078e-06	2010300C02Rik
ENSMUSG00000038233	187.093	-1.22774	0.442202	0.000240943	0.00203733	Fam198a
ENSMUSG00000034156	200.333	-1.22833	0.382126	6.38079e-05	0.000667265	Tspoap1
ENSMUSG00000028860	370.045	-1.22897	0.234669	9.84696e-09	3.73286e-07	Sytl1
ENSMUSG00000066892	1195.55	-1.23468	0.174741	9.85013e-14	1.23954e-11	Fbxl12
ENSMUSG00000011632	17.7814	-1.23748	1.05791	0.00442497	0.0221248	Pinlyp
ENSMUSG00000067567	1106.6	-1.23767	0.112565	2.48082e-29	1.85751e-26	Hdac8
ENSMUSG00000026883	431.458	-1.24062	0.253173	5.51111e-08	1.59897e-06	Dab2ip
ENSMUSG00000030122	55.7661	-1.24482	0.267412	1.9849e-07	4.78646e-06	Ptms
ENSMUSG00000047880	88.0717	-1.25285	0.508157	0.000497978	0.00369601	Cxcr5
ENSMUSG00000027514	246.308	-1.25539	0.236179	5.56549e-09	2.2344e-07	Zbp1
ENSMUSG00000041189	120.034	-1.25702	0.499506	0.000463877	0.00347849	Chrnb1
ENSMUSG00000073791	234.237	-1.25836	0.220158	7.05399e-10	3.84122e-08	Efcab7
ENSMUSG00000040714	38.1171	-1.27084	0.407236	8.58445e-05	0.000859306	Klc3
ENSMUSG00000038418	436.69	-1.28725	0.199003	5.78344e-12	5.23418e-10	Egr1
ENSMUSG00000041135	473.443	-1.292	0.174899	9.39701e-15	1.37961e-12	Ripk2
ENSMUSG00000063450	616.437	-1.29407	0.177254	1.77691e-14	2.48684e-12	Syne2
ENSMUSG00000102154	41.7034	-1.29628	0.539603	0.000645901	0.00456244	Gm37469
ENSMUSG00000079363	384.359	-1.30172	0.22257	2.60099e-10	1.57691e-08	Gbp4
ENSMUSG00000104501	125.86	-1.30449	0.394323	4.47409e-05	0.000494097	Gm37736
ENSMUSG00000028344	195.221	-1.30633	0.345432	7.44995e-06	0.000107479	Invs
ENSMUSG00000054808	17808.7	-1.31953	0.0442219	7.79199e-197	5.83425e-193	Actn4
ENSMUSG00000058470	123.907	-1.32897	0.29872	4.61463e-07	1.00006e-05	Gm8369
ENSMUSG00000030325	104.526	-1.33498	0.337866	3.90247e-06	6.19063e-05	Klrb1c
ENSMUSG00000032359	100.93	-1.33727	0.563916	0.000509083	0.0037647	Ctsh
ENSMUSG00000002409	201.416	-1.34079	0.264898	2.36198e-08	7.65598e-07	Dyrk1b
ENSMUSG00000028134	6963.23	-1.36617	0.125606	9.53071e-29	6.7963e-26	Ptbp2
ENSMUSG00000058099	638.398	-1.36845	0.153596	3.0769e-20	9.40339e-18	Nfam1
ENSMUSG00000026222	2922.29	-1.37472	0.108137	3.03751e-38	4.13515e-35	Sp100
ENSMUSG00000070372	12928.4	-1.37762	0.129023	5.60189e-28	3.81311e-25	Capza1
ENSMUSG00000026778	295.586	-1.38221	0.2692	1.53011e-08	5.36612e-07	Prkcq
ENSMUSG00000022708	290.518	-1.38564	0.20475	7.31417e-13	7.93693e-11	Zbtb20
ENSMUSG00000061665	697.05	-1.3895	0.147727	3.18356e-22	1.32427e-19	Cd2ap
ENSMUSG00000019122	72.8267	-1.40485	0.549659	0.000381406	0.00296396	Ccl9
ENSMUSG00000040183	251.695	-1.40718	0.32354	6.80898e-07	1.38727e-05	Ankrd6
ENSMUSG00000019312	990.495	-1.4105	0.479112	0.00013233	0.00122324	Grb7
ENSMUSG00000085110	128.254	-1.41126	0.243256	3.6947e-10	2.14037e-08	Gm13920
ENSMUSG00000035000	9149.18	-1.41384	0.117707	1.85768e-34	1.85458e-31	Dpp4
ENSMUSG00000020701	402.594	-1.42348	0.338399	1.17705e-06	2.22835e-05	Tmem132e
ENSMUSG00000025020	647.021	-1.43039	0.30342	1.24335e-07	3.19918e-06	Slit1
ENSMUSG00000062157	112.896	-1.43273	0.544625	0.000331091	0.00264432	Ifnlr1
ENSMUSG00000021567	1008.23	-1.43509	0.172148	4.46437e-18	9.83147e-16	Nkd2
ENSMUSG00000057897	550.942	-1.44888	0.285881	1.71433e-08	5.84172e-07	Camk2b
ENSMUSG00000090386	48.7804	-1.45124	0.442611	4.50772e-05	0.000497444	Mir99ahg
ENSMUSG00000020788	11141.7	-1.45778	0.161337	1.18458e-20	3.69563e-18	Atp2a3
ENSMUSG00000038894	405.413	-1.47683	0.176154	2.68558e-18	6.18717e-16	Irs2
ENSMUSG00000029298	741.018	-1.47884	0.209203	8.08947e-14	1.03538e-11	Gbp9
ENSMUSG00000025188	988.075	-1.48216	0.121778	2.74675e-35	2.93805e-32	Hps1
ENSMUSG00000042216	247.011	-1.49411	0.254112	2.14694e-10	1.30693e-08	Sgsm1
ENSMUSG00000027330	7150.62	-1.50225	0.152318	3.55323e-24	1.6628e-21	Cdc25b
ENSMUSG00000061859	665.236	-1.50452	0.164266	2.97155e-21	1.0595e-18	Patj
ENSMUSG00000022584	558.313	-1.54461	0.831357	0.00160219	0.00963954	Ly6c2
ENSMUSG00000045667	3213.81	-1.5539	0.224581	2.20964e-13	2.71775e-11	Smtnl2
ENSMUSG00000045092	952.675	-1.55594	0.203368	1.11148e-15	1.78972e-13	S1pr1
ENSMUSG00000038370	770.95	-1.57406	0.418761	7.42616e-06	0.000107342	Pcp4l1
ENSMUSG00000027007	315.449	-1.58354	0.175012	8.27678e-21	2.66755e-18	Ssfa2
ENSMUSG00000026255	286.129	-1.59771	0.262593	6.23295e-11	4.46595e-09	Efhd1
ENSMUSG00000021408	1411.37	-1.61756	0.173418	4.89468e-22	1.87943e-19	Ripk1
ENSMUSG00000030786	88.5343	-1.63625	0.484881	3.15262e-05	0.000365123	Itgam
ENSMUSG00000068758	117.875	-1.65999	0.326094	1.7154e-08	5.84172e-07	Il3ra
ENSMUSG00000022475	4066.12	-1.67336	0.133719	3.60717e-37	4.50144e-34	Hdac7
ENSMUSG00000026748	181.166	-1.68282	0.473352	1.60231e-05	0.00020685	Plxdc2
ENSMUSG00000110279	75.8758	-1.71062	0.282617	7.39952e-11	5.15385e-09	Gm45552
ENSMUSG00000038375	165.997	-1.71746	0.319078	3.80734e-09	1.63367e-07	Trp53inp2
ENSMUSG00000048215	292.836	-1.71885	0.317052	2.75491e-09	1.25777e-07	A630023P12Rik
ENSMUSG00000020272	3814.26	-1.75014	0.119725	1.24682e-49	2.66731e-46	Stk10
ENSMUSG00000041119	262.347	-1.76089	0.335622	7.62182e-09	2.97231e-07	Pde9a
ENSMUSG00000029171	1189.59	-1.77726	0.143453	1.98512e-36	2.28671e-33	Pgm1
ENSMUSG00000021200	228.183	-1.77898	0.206653	4.27454e-19	1.14306e-16	Asb2
ENSMUSG00000032375	122.32	-1.79285	0.448622	2.84189e-06	4.72858e-05	Aph1b
ENSMUSG00000053965	230.419	-1.85079	0.276158	9.15142e-13	9.85918e-11	Pde5a
ENSMUSG00000098322	53.2177	-1.86376	0.459843	2.23262e-06	3.85622e-05	5830468F06Rik
ENSMUSG00000020335	62.9003	-1.86933	0.725123	0.000287394	0.00235305	Zfp354b
ENSMUSG00000029484	115.198	-1.88102	0.65052	0.000128647	0.0011951	Anxa3
ENSMUSG00000020101	97.8058	-1.93514	0.615681	6.09203e-05	0.000642	Vsir
ENSMUSG00000084993	32.0155	-1.96833	0.440183	3.65209e-07	8.16269e-06	Gm12305
ENSMUSG00000116762	143.074	-1.98986	0.409787	4.91068e-08	1.45331e-06	AC161376.1
ENSMUSG00000002500	165.62	-1.99944	0.340005	1.61777e-10	1.04423e-08	Rpl3l
ENSMUSG00000044037	183.427	-2.0005	0.361802	1.4363e-09	7.02893e-08	Als2cl
ENSMUSG00000070504	386.867	-2.05365	0.316204	2.96684e-12	2.82983e-10	Fcrl6
ENSMUSG00000005883	190.399	-2.05425	0.342707	8.9352e-11	6.00021e-09	Spo11
ENSMUSG00000092274	136.589	-2.08453	0.258102	3.60611e-17	7.01318e-15	Neat1
ENSMUSG00000041187	4971.39	-2.11439	0.0755443	1.48717e-173	7.42348e-170	Prkd2
ENSMUSG00000046480	1134.56	-2.14084	0.22134	2.033e-23	9.22553e-21	Scn4b
ENSMUSG00000027699	9900.43	-2.23327	0.12164	4.93889e-77	1.849e-73	Ect2
ENSMUSG00000017002	54.1617	-2.28882	0.727015	5.33921e-05	0.000574387	Slpi
ENSMUSG00000039774	1397.5	-2.29872	0.129436	4.40272e-72	1.31862e-68	Galnt12
ENSMUSG00000056418	211.162	-2.30054	0.615245	5.72169e-06	8.63733e-05	BC043934
ENSMUSG00000025877	133.26	-2.31175	0.941886	0.000377285	0.00293498	Hk3
ENSMUSG00000069805	263.678	-2.37399	0.215374	1.39704e-29	1.16226e-26	Fbp1
ENSMUSG00000108722	201.603	-2.37628	0.254102	3.58147e-22	1.44953e-19	Gm34225
ENSMUSG00000059027	74.2711	-2.3854	0.405797	1.25161e-10	8.18463e-09	9630013D21Rik
ENSMUSG00000031328	3451.98	-2.38811	0.311011	7.37008e-16	1.2263e-13	Flna
ENSMUSG00000066705	1378.79	-2.40294	0.178757	1.5861e-42	2.6391e-39	Fxyd6
ENSMUSG00000054641	3371.21	-2.47092	0.189834	4.27458e-40	6.40118e-37	Mmrn1
ENSMUSG00000097595	26.1916	-2.47524	0.571429	6.19005e-07	1.27708e-05	1500002F19Rik
ENSMUSG00000041911	64.774	-2.51302	0.463664	2.7285e-09	1.24952e-07	Dlx1
ENSMUSG00000012428	651.406	-2.54188	0.404945	1.42688e-11	1.14879e-09	Steap4
ENSMUSG00000040314	572.608	-2.56657	0.822057	4.43435e-05	0.000490431	Ctsg
ENSMUSG00000103659	38.8115	-2.64851	1.0135	2.44813e-05	0.000293756	Gm32569
ENSMUSG00000031712	89.0219	-2.66219	0.58354	2.14323e-07	5.12958e-06	Il15
ENSMUSG00000032363	68.8206	-2.67406	0.522014	1.44411e-08	5.12454e-07	Adamts7
ENSMUSG00000016262	206.773	-2.69656	0.431437	1.77151e-11	1.39623e-09	Sertad4
ENSMUSG00000000881	319.691	-2.84723	0.346344	7.84398e-18	1.63144e-15	Dlg3
ENSMUSG00000059498	119.439	-2.86807	1.00193	0.000105262	0.00101762	Fcgr3
ENSMUSG00000030536	6741.98	-2.88242	0.163617	2.19832e-71	5.48664e-68	Iqgap1
ENSMUSG00000057729	438.479	-2.90267	0.750611	3.71127e-06	5.94398e-05	Prtn3
ENSMUSG00000017897	295.369	-2.91507	0.265993	2.28248e-29	1.79896e-26	Eya2
ENSMUSG00000009350	3741.07	-3.12464	0.788004	2.01709e-06	3.53699e-05	Mpo
ENSMUSG00000032744	651.744	-3.33829	0.450224	5.30978e-15	8.03171e-13	Heyl
ENSMUSG00000020125	1545.93	-3.35577	0.764124	3.7737e-07	8.3969e-06	Elane
ENSMUSG00000024681	240.181	-3.65888	0.862418	7.00467e-07	1.41559e-05	Ms4a3
ENSMUSG00000055421	83.1995	-4.34335	0.640907	3.14039e-13	3.58987e-11	Pcdh9

## Sheet: Fig4a P1sKOvsCtrl_allresults
EnsemblGeneID	baseMean	log2FoldChange	lfcSE	pvalue	padj	GeneName
ENSMUSG00000028134	6963.23	4.16497	0.126848	2.33191e-238	3.07253e-234	Ptbp2
ENSMUSG00000067017	8189.35	-3.74063	0.117646	6.11032e-223	4.02548e-219	Gm3608
ENSMUSG00000006498	8108.6	-1.97989	0.0656884	8.12592e-201	3.5689e-197	Ptbp1
ENSMUSG00000003379	38082.3	-0.953985	0.0770996	2.08168e-36	6.85705e-33	Cd79a
ENSMUSG00000104413	903.936	-1.39249	0.125408	5.96033e-30	1.57067e-26	Gm37065
ENSMUSG00000032058	4272.66	-0.954993	0.0864426	1.24476e-29	2.7335e-26	Ppp2r1b
ENSMUSG00000054426	457.932	-1.50822	0.137534	2.20288e-29	4.14646e-26	A930005H10Rik
ENSMUSG00000028923	2595.52	-1.06235	0.0988424	3.15817e-28	5.20151e-25	Necap2
ENSMUSG00000070372	12928.4	1.36462	0.129115	2.20745e-27	3.2317e-24	Capza1
ENSMUSG00000030533	1424.08	-1.1432	0.1092	6.22831e-27	8.20642e-24	Unc45a
ENSMUSG00000029171	1189.59	-1.41857	0.139021	8.37929e-26	1.00369e-22	Pgm1
ENSMUSG00000041115	321.718	1.75665	0.173746	2.37443e-25	2.60712e-22	Iqsec2
ENSMUSG00000035000	9149.18	-1.17515	0.1176	7.51646e-25	7.61822e-22	Dpp4
ENSMUSG00000002227	1341.24	-1.03183	0.111038	6.37543e-22	6.00019e-19	Mov10
ENSMUSG00000039345	1036.18	1.06859	0.117797	6.26732e-21	5.50521e-18	Mettl22
ENSMUSG00000100455	801.928	1.23999	0.152559	2.04543e-17	1.68441e-14	Gm29170
ENSMUSG00000040663	713.977	1.02397	0.12863	8.46981e-17	6.5646e-14	Clcf1
ENSMUSG00000001029	1756.85	-0.730603	0.0927042	1.89278e-16	1.38551e-13	Icam2
ENSMUSG00000020882	1149.09	1.1043	0.149366	6.86547e-15	4.76102e-12	Cacnb1
ENSMUSG00000025465	2395.77	-0.51712	0.0709829	2.0624e-14	1.35871e-11	Echs1
ENSMUSG00000026187	1684.6	-0.758359	0.10534	2.95898e-14	1.85655e-11	Xrcc5
ENSMUSG00000021493	800.016	0.802686	0.116967	4.27138e-13	2.55817e-10	Pdlim7
ENSMUSG00000001525	67884.2	0.537338	0.0792835	8.74872e-13	5.01188e-10	Tubb5
ENSMUSG00000021288	3708.09	0.5169	0.0769188	1.50864e-12	8.28242e-10	Klc1
ENSMUSG00000044694	352.625	0.897143	0.137669	3.85008e-12	2.02914e-09	2010007H06Rik
ENSMUSG00000039774	1397.5	-0.811932	0.126552	7.71133e-12	3.90787e-09	Galnt12
ENSMUSG00000024426	527.941	0.978784	0.153894	1.01255e-11	4.94124e-09	Atat1
ENSMUSG00000012519	895.175	-1.02825	0.162265	1.10867e-11	5.21709e-09	Mlkl
ENSMUSG00000045973	4554.03	0.436855	0.0678894	1.19135e-11	5.41283e-09	Slc25a51
ENSMUSG00000024222	8339.59	0.374261	0.0593792	2.89961e-11	1.27351e-08	Fkbp5
ENSMUSG00000085379	116.5	1.25358	0.206432	6.48164e-11	2.75491e-08	2310058D17Rik
ENSMUSG00000061665	697.05	-0.879171	0.145239	7.48814e-11	3.08324e-08	Cd2ap
ENSMUSG00000029016	660.257	1.15777	0.193631	1.12435e-10	4.48922e-08	Clcn6
ENSMUSG00000032122	1650.14	0.590142	0.0989141	1.5859e-10	6.14584e-08	Slc37a2
ENSMUSG00000026767	1090.35	-0.599501	0.100973	1.98564e-10	7.26746e-08	Mindy3
ENSMUSG00000112969	36.5294	-2.83934	0.482525	1.96488e-10	7.26746e-08	Gm48496
ENSMUSG00000089762	129.224	1.36876	0.240502	5.63659e-10	2.00723e-07	Ier5l
ENSMUSG00000031575	7782.51	-0.298256	0.0522522	1.54861e-09	5.36962e-07	Ash2l
ENSMUSG00000059851	2058.74	-0.342139	0.0607753	2.0845e-09	7.04242e-07	Kmt5c
ENSMUSG00000030742	669.352	-0.76948	0.14171	3.02041e-09	9.94924e-07	Lat
ENSMUSG00000021408	1411.37	-0.939418	0.174265	3.4052e-09	1.09431e-06	Ripk1
ENSMUSG00000040112	2195.69	-0.474659	0.0870284	3.75002e-09	1.1383e-06	Mrps35
ENSMUSG00000041298	622.584	0.85621	0.158838	3.78131e-09	1.1383e-06	Katnal1
ENSMUSG00000073557	269.049	1.40944	0.26237	3.80125e-09	1.1383e-06	Ppp1r12b
ENSMUSG00000052676	677.717	0.834781	0.156792	5.13741e-09	1.50423e-06	Zmat1
ENSMUSG00000067567	1106.6	-0.597838	0.111995	5.26474e-09	1.508e-06	Hdac8
ENSMUSG00000020528	2636.11	0.46879	0.0870154	5.53148e-09	1.5507e-06	Prpsap2
ENSMUSG00000002043	870.743	-0.562834	0.105405	6.14558e-09	1.68696e-06	Trappc6a
ENSMUSG00000032366	880.779	-0.661137	0.124967	7.09278e-09	1.90724e-06	Tpm1
ENSMUSG00000031813	2193.5	-0.486324	0.0931477	1.01733e-08	2.68087e-06	Mvb12a
ENSMUSG00000024403	154.653	1.33715	0.262248	1.37227e-08	3.5453e-06	Atp6v1g2
ENSMUSG00000006800	717.629	1.08401	0.21203	1.46395e-08	3.70943e-06	Sulf2
ENSMUSG00000054808	17808.7	-0.237191	0.0441383	2.004e-08	4.98203e-06	Actn4
ENSMUSG00000022519	1183.94	0.876271	0.173634	2.58155e-08	6.29897e-06	Srl
ENSMUSG00000022514	634.74	-0.751846	0.150882	2.85523e-08	6.84008e-06	Il1rap
ENSMUSG00000029468	191.634	-0.967869	0.196784	4.04623e-08	9.5202e-06	P2rx7
ENSMUSG00000039018	1086.4	-0.511174	0.102724	4.39708e-08	1.01642e-05	Mtg1
ENSMUSG00000034401	3322.06	-0.562606	0.113736	4.67353e-08	1.0617e-05	Spata6
ENSMUSG00000025188	988.075	-0.599196	0.121302	4.96072e-08	1.10784e-05	Hps1
ENSMUSG00000051007	1417.46	-0.433295	0.0871366	5.49798e-08	1.20736e-05	Gatd1
ENSMUSG00000037860	695.611	-0.772216	0.159604	6.27528e-08	1.35546e-05	Aim2
ENSMUSG00000028419	1725.03	-0.67813	0.139977	6.68163e-08	1.41995e-05	Chmp5
ENSMUSG00000033111	713.99	-0.612847	0.127351	8.88005e-08	1.8572e-05	3830406C13Rik
ENSMUSG00000020585	4068.97	-0.284278	0.0571189	9.19977e-08	1.894e-05	Laptm4a
ENSMUSG00000023067	4617.83	0.465342	0.0962085	1.00046e-07	2.028e-05	Cdkn1a
ENSMUSG00000034282	202.269	1.37721	0.297123	1.39844e-07	2.79179e-05	Evpl
ENSMUSG00000059714	1581.85	0.471339	0.0988992	1.42935e-07	2.79543e-05	Flot1
ENSMUSG00000112063	422.807	-0.81839	0.175063	1.44269e-07	2.79543e-05	Gm32220
ENSMUSG00000096255	1514.43	-0.892255	0.191948	1.60604e-07	3.06685e-05	Dynlt1b
ENSMUSG00000037847	621.976	-0.630067	0.134849	1.72471e-07	3.24639e-05	Nmrk1
ENSMUSG00000060260	474.483	0.606799	0.130102	1.83587e-07	3.40697e-05	Pwwp2b
ENSMUSG00000052572	1760.86	-0.622828	0.134571	1.99774e-07	3.65587e-05	Dlg2
ENSMUSG00000052369	1828.48	-0.49217	0.105406	2.06186e-07	3.72151e-05	Tmem106c
ENSMUSG00000086350	173.493	1.02616	0.223732	2.13556e-07	3.80246e-05	B230369F24Rik
ENSMUSG00000015575	4613.81	-0.342969	0.0724436	2.24578e-07	3.94539e-05	Atp6v0e
ENSMUSG00000022594	834.998	0.729455	0.15959	2.56065e-07	4.43935e-05	Lynx1
ENSMUSG00000034959	397.582	-0.590022	0.128676	2.69043e-07	4.60378e-05	Rubcnl
ENSMUSG00000027550	1936.18	-0.760597	0.168613	3.26272e-07	5.4942e-05	Lrrcc1
ENSMUSG00000062510	3192.23	-0.321159	0.0685697	3.29419e-07	5.4942e-05	Nsl1
ENSMUSG00000028613	854.593	0.54974	0.120976	3.35861e-07	5.53162e-05	Lrp8
ENSMUSG00000063320	524.774	-0.675771	0.149746	3.50372e-07	5.69693e-05	1190007I07Rik
ENSMUSG00000097287	185.23	0.929377	0.20771	3.54545e-07	5.69693e-05	D130017N08Rik
ENSMUSG00000024665	2657.23	0.44243	0.0969528	4.26333e-07	6.76792e-05	Fads2
ENSMUSG00000032936	839.156	0.653492	0.146651	4.34593e-07	6.8169e-05	Camkv
ENSMUSG00000027552	791.151	-0.421358	0.0926688	4.46573e-07	6.84191e-05	E2f5
ENSMUSG00000032556	8293.62	0.396595	0.0889412	4.42218e-07	6.84191e-05	Bfsp2
ENSMUSG00000045282	488.72	0.792582	0.178452	4.56554e-07	6.91443e-05	Tmem86b
ENSMUSG00000046329	330.502	0.869612	0.197491	5.15269e-07	7.71498e-05	Slc25a23
ENSMUSG00000031823	2010.23	0.433127	0.0971028	6.30433e-07	9.33324e-05	Zdhhc7
ENSMUSG00000030815	814.98	0.401711	0.0903462	7.90242e-07	0.000114775	Phkg2
ENSMUSG00000056220	781.651	-0.672919	0.155094	7.92694e-07	0.000114775	Pla2g4a
ENSMUSG00000020894	1524.46	0.418615	0.0960809	8.50163e-07	0.000121758	Vamp2
ENSMUSG00000039891	106.83	1.62446	0.381383	8.90001e-07	0.000126093	Txlnb
ENSMUSG00000040554	51.0031	-2.0975	0.498316	8.99858e-07	0.000126133	Aipl1
ENSMUSG00000000552	364.876	0.457913	0.104665	9.2201e-07	0.000126546	Zfp385a
ENSMUSG00000056999	21855	-0.548754	0.12665	9.12877e-07	0.000126546	Ide
ENSMUSG00000078485	1159.55	0.33158	0.0745474	9.40292e-07	0.000127725	Plekhn1
ENSMUSG00000054675	2956.66	0.623619	0.14499	9.82835e-07	0.000132141	Tmem119
ENSMUSG00000085213	282.095	0.680361	0.159406	1.04286e-06	0.000138796	Gm13091
ENSMUSG00000035062	424.404	-0.544805	0.126707	1.06017e-06	0.000139687	Zc4h2
ENSMUSG00000024696	250.377	-0.641871	0.15096	1.16109e-06	0.000151471	Lpxn
ENSMUSG00000063018	161.157	-0.833847	0.197841	1.19594e-06	0.000154487	2010204K13Rik
ENSMUSG00000019188	4275.62	-0.368155	0.0839576	1.25357e-06	0.000160359	H13
ENSMUSG00000052914	311.885	-0.898168	0.216037	1.43766e-06	0.000182141	Cyp2j6
ENSMUSG00000026317	445.288	0.553102	0.131151	1.5379e-06	0.000192985	Cln8
ENSMUSG00000075602	3149.69	0.656331	0.158597	1.61551e-06	0.000200811	Ly6a
ENSMUSG00000025747	12754.4	-0.337459	0.0781875	1.87594e-06	0.000230837	Tyms
ENSMUSG00000060992	11687.2	-0.272373	0.0616147	1.89211e-06	0.000230837	Copz1
ENSMUSG00000040339	706.732	-1.13022	0.278976	2.16633e-06	0.000261868	Fam102b
ENSMUSG00000046034	3084.87	-0.449669	0.107471	2.28726e-06	0.000273972	Otulin
ENSMUSG00000078517	4340.52	0.567456	0.138004	2.43724e-06	0.000289307	Emc1
ENSMUSG00000027478	1160.9	-0.68933	0.170141	2.61914e-06	0.000306671	Dnmt3b
ENSMUSG00000028494	2030.17	-0.414747	0.0998203	2.63007e-06	0.000306671	Plin2
ENSMUSG00000061894	278.599	0.805636	0.200979	2.8659e-06	0.000331238	Zscan20
ENSMUSG00000004626	3150.54	-0.353393	0.0850138	3.03909e-06	0.000346241	Stxbp2
ENSMUSG00000051396	403.07	0.812186	0.20441	3.04827e-06	0.000346241	Gm45902
ENSMUSG00000026000	2215.93	-0.367557	0.0883283	3.14779e-06	0.000354489	Lancl1
ENSMUSG00000061411	209.023	1.17561	0.30036	3.689e-06	0.000411918	Nol4l
ENSMUSG00000082691	2448.76	-0.571948	0.143147	3.78195e-06	0.000418748	Dynlt1-ps1
ENSMUSG00000032415	297.846	-0.537744	0.135309	4.27121e-06	0.000465103	Ube2cbp
ENSMUSG00000032648	766.131	0.590218	0.149485	4.25438e-06	0.000465103	Pygm
ENSMUSG00000003344	2219.13	0.431069	0.106477	4.41227e-06	0.000468839	Btbd2
ENSMUSG00000028071	439.238	-0.633884	0.160637	4.36447e-06	0.000468839	Sh2d2a
ENSMUSG00000036932	5139.47	-0.274768	0.0658417	4.41182e-06	0.000468839	Aifm1
ENSMUSG00000034926	690.66	0.470693	0.117925	4.56362e-06	0.000481042	Dhcr24
ENSMUSG00000029923	253.448	-0.6326	0.161146	4.80555e-06	0.000502523	Rab19
ENSMUSG00000045092	952.675	0.818188	0.21189	4.91346e-06	0.000509762	S1pr1
ENSMUSG00000028214	378.946	-0.709281	0.182078	5.10248e-06	0.000524114	Gem
ENSMUSG00000079427	537.715	-0.604228	0.154624	5.13135e-06	0.000524114	Mthfsl
ENSMUSG00000021213	578.59	-0.513474	0.130898	5.47136e-06	0.000554544	Akr1c13
ENSMUSG00000011148	4631.63	0.401947	0.100271	6.02509e-06	0.000606005	Adssl1
ENSMUSG00000022177	5985.79	-0.336689	0.0833599	6.2771e-06	0.000626569	Haus4
ENSMUSG00000035142	662.385	-0.590301	0.153666	6.83959e-06	0.000677582	Nubpl
ENSMUSG00000041426	1341.6	-0.366129	0.0932092	7.78725e-06	0.000765708	Hibch
ENSMUSG00000030231	653.735	-0.431428	0.111475	8.19152e-06	0.000793614	Plekha5
ENSMUSG00000030934	10026.5	-0.338443	0.0847877	8.18385e-06	0.000793614	Oat
ENSMUSG00000024078	1771.45	-0.41667	0.107561	8.26102e-06	0.000794506	Ttc27
ENSMUSG00000008496	197.494	0.751568	0.20034	8.43213e-06	0.000805085	Pou2f2
ENSMUSG00000002944	1084.57	0.710836	0.190374	8.99805e-06	0.000852938	Cd36
ENSMUSG00000029516	1175.81	0.505447	0.13274	9.14004e-06	0.000860208	Cit
ENSMUSG00000022748	1818.01	-0.396553	0.10264	9.3116e-06	0.000870139	Cmss1
ENSMUSG00000083161	915.075	0.60932	0.161865	9.60012e-06	0.000890783	Gm11427
ENSMUSG00000036948	575.66	0.587043	0.156287	9.6879e-06	0.000892642	BC037034
ENSMUSG00000026701	11253.8	-0.37376	0.0963226	9.90599e-06	0.000906398	Prdx6
ENSMUSG00000018008	1982.22	0.340452	0.0880009	1.13474e-05	0.00103113	Cyth4
ENSMUSG00000029836	4319.41	0.46308	0.12239	1.16983e-05	0.00105573	Cbx3
ENSMUSG00000047804	1628.27	0.357279	0.0925044	1.20905e-05	0.00108264	Akap10
ENSMUSG00000047888	428.525	0.651427	0.17702	1.21608e-05	0.00108264	Tnrc6b
ENSMUSG00000056666	691.7	-0.533415	0.144698	1.25562e-05	0.00111034	Retsat
ENSMUSG00000115338	2570.4	-0.398725	0.105496	1.27351e-05	0.00111866	Pnp
ENSMUSG00000053137	750.413	0.548321	0.148577	1.31054e-05	0.00114356	Mapk11
ENSMUSG00000031534	627.891	-0.489021	0.131611	1.32075e-05	0.00114489	Smim19
ENSMUSG00000018659	834.611	-0.473906	0.127576	1.37117e-05	0.00116576	Pnpo
ENSMUSG00000026740	763.312	-0.431111	0.115277	1.36197e-05	0.00116576	Dnajc1
ENSMUSG00000038855	675.92	0.589628	0.161278	1.37138e-05	0.00116576	Itpkb
ENSMUSG00000035569	6016.12	0.331602	0.0873284	1.54786e-05	0.00130734	Ankrd11
ENSMUSG00000075408	825.524	0.562964	0.154862	1.57355e-05	0.00132058	6030408B16Rik
ENSMUSG00000059883	431.355	-0.624743	0.175092	1.58757e-05	0.00132392	Irak4
ENSMUSG00000000295	1627.98	-0.431122	0.116229	1.61422e-05	0.00133175	Hddc2
ENSMUSG00000004056	3489.43	0.36245	0.0962361	1.62729e-05	0.00133175	Akt2
ENSMUSG00000039167	832.296	-0.530024	0.145312	1.62443e-05	0.00133175	Adgrl4
ENSMUSG00000022022	699.98	-0.354216	0.0946697	1.75086e-05	0.00142403	Mtrf1
ENSMUSG00000097412	826.928	-0.476321	0.131192	1.8078e-05	0.00146133	1810014B01Rik
ENSMUSG00000037370	122.308	-0.862001	0.245006	1.86022e-05	0.00149453	Enpp1
ENSMUSG00000033287	421.254	0.500519	0.138312	1.87897e-05	0.00150044	Kctd17
ENSMUSG00000021488	1922.72	0.424547	0.115886	1.91508e-05	0.00152006	Nsd1
ENSMUSG00000062646	403.913	-0.672825	0.190001	1.97646e-05	0.00155939	Ganc
ENSMUSG00000048076	25595.1	-0.213036	0.0544262	2.08177e-05	0.0016327	Arf1
ENSMUSG00000084347	117.463	0.664038	0.188435	2.14962e-05	0.00167594	Akt2-ps
ENSMUSG00000029033	1381.96	0.501988	0.14044	2.25617e-05	0.00174785	Acap3
ENSMUSG00000031521	612.738	-0.598694	0.170253	2.26839e-05	0.00174785	Aga
ENSMUSG00000051817	651.793	0.506711	0.142205	2.30568e-05	0.00176626	Sox12
ENSMUSG00000033429	449.239	-0.556533	0.157643	2.32574e-05	0.00177132	Mcee
ENSMUSG00000023235	529.937	-0.490789	0.138131	2.35266e-05	0.00178153	Ccl25
ENSMUSG00000022562	126.759	1.10507	0.325517	2.39219e-05	0.00180111	Oplah
ENSMUSG00000026687	4944.71	-0.311273	0.0826321	2.41193e-05	0.00180566	Aldh9a1
ENSMUSG00000028217	120.319	-1.42419	0.428285	2.44718e-05	0.00182169	Cdh17
ENSMUSG00000075269	635.512	0.725281	0.209373	2.46914e-05	0.00182772	Bex6
ENSMUSG00000069805	263.678	-0.722944	0.210009	2.5789e-05	0.0018983	Fbp1
ENSMUSG00000029428	1482.41	0.442104	0.124247	2.6613e-05	0.00194807	Stx2
ENSMUSG00000034121	267.938	-0.695591	0.201573	2.70661e-05	0.00197029	Mks1
ENSMUSG00000004105	1145.78	0.584984	0.170236	2.78527e-05	0.00201641	Angptl2
ENSMUSG00000028573	194.957	-0.890393	0.261917	2.80492e-05	0.00201954	Fggy
ENSMUSG00000038005	6199.59	-0.39452	0.111082	2.88186e-05	0.0020525	Hpf1
ENSMUSG00000039637	14221	0.263729	0.0710003	2.87095e-05	0.0020525	Coro7
ENSMUSG00000027082	514.533	-0.812603	0.242149	2.91688e-05	0.00205523	Tfpi
ENSMUSG00000049643	2182.06	0.414768	0.117145	2.90517e-05	0.00205523	2310022A10Rik
ENSMUSG00000024766	1492.37	-0.491766	0.140558	2.9639e-05	0.00207725	Lipo3
ENSMUSG00000023328	87.6928	1.77319	0.547645	3.24335e-05	0.00226108	Ache
ENSMUSG00000049625	7132.14	0.251574	0.0674777	3.29291e-05	0.00228355	Tifab
ENSMUSG00000025271	115.079	-1.12133	0.341614	3.37259e-05	0.00232655	Pfkfb1
ENSMUSG00000023990	1978.31	0.324288	0.0899801	3.42675e-05	0.00235161	Tfeb
ENSMUSG00000020696	511.947	-0.536879	0.157556	3.68873e-05	0.00251828	Rffl
ENSMUSG00000079179	1170.21	0.319904	0.089373	3.82181e-05	0.00259568	Rab10os
ENSMUSG00000021710	852.899	-0.552461	0.164824	4.4635e-05	0.00301595	Nln
ENSMUSG00000078572	1055.81	-0.301004	0.0847683	4.57071e-05	0.00307263	Ndufaf8
ENSMUSG00000047749	606.341	0.482805	0.143219	4.73252e-05	0.00316526	Zc3hav1l
ENSMUSG00000029602	754.022	0.619745	0.187808	4.86534e-05	0.00322139	Rasal1
ENSMUSG00000086013	272.118	0.581911	0.174468	4.85714e-05	0.00322139	Gm15706
ENSMUSG00000029480	3200.96	0.356183	0.10296	4.97333e-05	0.00327643	Dhx37
ENSMUSG00000023348	633.461	-0.422295	0.124628	5.26478e-05	0.00345118	Trip6
ENSMUSG00000030156	2037.16	0.357015	0.103928	5.481e-05	0.00357513	Cd69
ENSMUSG00000021143	905.774	0.409648	0.122051	6.08785e-05	0.00395141	Pacs2
ENSMUSG00000022951	805.435	0.402485	0.119996	6.16722e-05	0.00397181	Rcan1
ENSMUSG00000044148	3380.77	-0.254985	0.0712864	6.17958e-05	0.00397181	1810030O07Rik
ENSMUSG00000025538	524.378	-0.48763	0.148448	6.25107e-05	0.00399826	Sumf2
ENSMUSG00000041679	98.9935	-1.33972	0.429845	6.37824e-05	0.00404037	Lrrc29
ENSMUSG00000052563	197.292	0.676484	0.211041	6.36765e-05	0.00404037	D930048N14Rik
ENSMUSG00000030615	817.39	-0.508349	0.155864	6.50763e-05	0.00410261	Tmem126a
ENSMUSG00000028689	456.967	-0.468715	0.141658	6.56086e-05	0.00411647	Ccdc163
ENSMUSG00000028124	1742.92	0.346379	0.102596	7.04009e-05	0.00439622	Gclm
ENSMUSG00000027306	20379.8	-0.304895	0.0893382	7.33281e-05	0.00455741	Nusap1
ENSMUSG00000036155	847.838	0.622581	0.197142	7.38141e-05	0.00456608	Mgat5
ENSMUSG00000022130	530.194	-0.438163	0.134473	7.57764e-05	0.00464386	Tgds
ENSMUSG00000079003	1345.17	0.470053	0.144844	7.57158e-05	0.00464386	Samd1
ENSMUSG00000025507	2856.27	0.351881	0.105275	7.9738e-05	0.0048416	Pidd1
ENSMUSG00000032966	17492.2	-0.237473	0.067435	7.94034e-05	0.0048416	Fkbp1a
ENSMUSG00000024588	1561.29	-0.418523	0.128725	8.20515e-05	0.00495922	Fech
ENSMUSG00000028549	901.965	-0.427896	0.132016	8.35698e-05	0.00502792	Itgb3bp
ENSMUSG00000022020	2416.38	-0.320289	0.0955462	8.51315e-05	0.0050986	Naa16
ENSMUSG00000022768	81.3244	1.15515	0.38064	8.94787e-05	0.00533471	Ccdc116
ENSMUSG00000025262	249.014	0.974204	0.322816	9.2254e-05	0.0054754	Fam120c
ENSMUSG00000005506	7126.1	0.345428	0.104702	9.34293e-05	0.00548123	Celf1
ENSMUSG00000021420	1420.01	-0.324129	0.0977486	9.39198e-05	0.00548123	Fars2
ENSMUSG00000024725	6459.13	-0.271762	0.0780672	9.44322e-05	0.00548123	Ostf1
ENSMUSG00000033773	954.531	-0.262346	0.0765618	9.34162e-05	0.00548123	Rpap2
ENSMUSG00000042650	3493.28	0.275327	0.0811192	9.43815e-05	0.00548123	Alkbh5
ENSMUSG00000037815	7274.89	0.253408	0.0738788	9.5084e-05	0.00549486	Ctnna1
ENSMUSG00000026547	21401.5	-0.229542	0.0668366	9.61461e-05	0.00553197	Tagln2
ENSMUSG00000006276	2478.68	-0.340802	0.103598	9.70358e-05	0.00555889	Eps15l1
ENSMUSG00000021993	2407.48	-0.36321	0.11155	9.78792e-05	0.005571	Mipep
ENSMUSG00000022199	180.12	0.874646	0.289707	9.8093e-05	0.005571	Slc22a17
ENSMUSG00000029478	443.027	0.533836	0.171136	0.000100742	0.00561878	Ncor2
ENSMUSG00000037622	376.295	0.657749	0.214539	0.000101066	0.00561878	Wdtc1
ENSMUSG00000038582	1294.32	0.371215	0.114345	0.00010065	0.00561878	Pptc7
ENSMUSG00000039747	1427.74	0.456246	0.14424	0.000100454	0.00561878	Orai2
ENSMUSG00000042265	297.071	-0.574996	0.186297	9.95041e-05	0.00561878	Trem1
ENSMUSG00000024948	8648.18	0.321283	0.0973389	0.000103222	0.00571448	Map4k2
ENSMUSG00000096054	91.3653	1.04277	0.350124	0.000107323	0.00591667	Syne1
ENSMUSG00000029521	1710.05	-0.352467	0.108294	0.000108434	0.00592832	Chek2
ENSMUSG00000040774	2256.76	-0.381357	0.119113	0.000108189	0.00592832	Cept1
ENSMUSG00000048232	178.528	0.837015	0.278058	0.000109078	0.0059389	Fbxo10
ENSMUSG00000001143	3772.46	0.399648	0.12579	0.000111159	0.0059743	Lman2l
ENSMUSG00000030714	1478.58	-0.293323	0.0883641	0.000111542	0.0059743	Sgf29
ENSMUSG00000034854	670.344	0.479951	0.153705	0.000110299	0.0059743	Mfsd12
ENSMUSG00000037933	1931.81	0.323245	0.0999193	0.000111264	0.0059743	Bicd2
ENSMUSG00000029012	1508.51	-0.327832	0.101363	0.000122035	0.00649175	Orc5
ENSMUSG00000075010	2118.19	-0.315098	0.0967277	0.000122188	0.00649175	AW112010
ENSMUSG00000070643	186.404	0.612142	0.20296	0.000123615	0.00654115	Sox13
ENSMUSG00000026154	766.938	-0.301345	0.0922203	0.000127196	0.00670373	Sdhaf4
ENSMUSG00000022641	1578.19	0.319915	0.0992912	0.000127838	0.00671075	Bbx
ENSMUSG00000036299	2605.89	-0.361322	0.113914	0.000129273	0.00675912	BC031181
ENSMUSG00000031066	3564.36	0.251156	0.0749329	0.000130346	0.00678831	Usp11
ENSMUSG00000006763	1804.82	-0.393628	0.125677	0.000132654	0.00688128	Saal1
ENSMUSG00000020057	27.5053	-1.55219	0.541265	0.000138532	0.00713008	Dram1
ENSMUSG00000097971	8593.56	1.05874	0.367197	0.000138494	0.00713008	Gm26917
ENSMUSG00000034868	5770.24	-0.305367	0.0945638	0.000142407	0.007301	Myl12b
ENSMUSG00000020956	984.431	-0.4018	0.129971	0.000145481	0.0074297	Dtd2
ENSMUSG00000038421	529.012	-0.790115	0.27473	0.000148959	0.00757791	Fcrla
ENSMUSG00000032536	4479.46	0.354335	0.113049	0.000150999	0.00765215	Trak1
ENSMUSG00000061702	293.227	0.462175	0.152601	0.000153894	0.00776897	Tmem91
ENSMUSG00000049657	1171.61	0.435779	0.142758	0.000157248	0.00790802	Zbtb5
ENSMUSG00000004567	1521.52	0.376281	0.120499	0.000158709	0.00795114	Mcoln1
ENSMUSG00000030276	51.4011	0.946341	0.333078	0.000165634	0.00826663	Ttll3
ENSMUSG00000072763	349.625	-0.66326	0.23075	0.000177169	0.00880895	5430403G16Rik
ENSMUSG00000017453	64.0792	-1.55889	0.583543	0.000184817	0.00912769	Pipox
ENSMUSG00000038145	1108.45	0.348292	0.113755	0.000184965	0.00912769	Snrk
ENSMUSG00000039163	466.062	-0.351119	0.114054	0.000185968	0.00914295	Cmc1
ENSMUSG00000033209	127.682	0.922918	0.331314	0.000191078	0.00929022	Ttc28
ENSMUSG00000038225	430.697	-0.446533	0.150075	0.000190965	0.00929022	Primpol
ENSMUSG00000054452	6984.66	0.306898	0.0975385	0.000189768	0.00929022	Aes
ENSMUSG00000078480	71.7091	-0.970996	0.351119	0.000198436	0.00961245	Mrpl48-ps
ENSMUSG00000106022	50.0788	1.11745	0.40508	0.000199343	0.00962105	Gm42929
ENSMUSG00000026546	63.7329	-1.29965	0.476301	0.000203982	0.00980898	Cfap45
ENSMUSG00000001445	2261.44	-0.27948	0.0884481	0.000207439	0.00993897	Mrpl10
ENSMUSG00000019832	549.548	-0.637175	0.225474	0.000209799	0.0100078	Rab32
ENSMUSG00000052557	232.913	0.677833	0.240396	0.000210395	0.0100078	Gan
ENSMUSG00000025086	902.397	-0.383476	0.128076	0.000214549	0.0101687	Trub1
ENSMUSG00000048578	21057.1	0.301812	0.097851	0.000215451	0.0101748	Mlec
ENSMUSG00000017830	801.69	-0.413219	0.139738	0.000216452	0.0101856	Dhx58
ENSMUSG00000026285	95.8961	-1.16986	0.431281	0.000220954	0.0103605	Pdcd1
ENSMUSG00000045827	493.951	-0.623373	0.222895	0.000223676	0.0104509	Serpinb9
ENSMUSG00000045273	2663.46	-0.372771	0.125763	0.000225576	0.0105024	Cenph
ENSMUSG00000029165	1153.46	0.421395	0.143954	0.000229112	0.0106295	Agbl5
ENSMUSG00000030577	1099.21	-0.664641	0.239925	0.00023813	0.0110091	Cd22
ENSMUSG00000034135	861.749	0.353453	0.118139	0.000245519	0.0113111	Sik3
ENSMUSG00000028243	1068.13	-0.430736	0.148744	0.000247205	0.011349	Ubxn2b
ENSMUSG00000034274	2170.9	-0.284237	0.0917732	0.000252136	0.0115352	Thoc5
ENSMUSG00000028634	249.885	0.778997	0.285659	0.000256453	0.0116921	Hivep3
ENSMUSG00000017778	4141.79	-0.307604	0.101484	0.000262348	0.0118723	Cox7c
ENSMUSG00000018666	6115.74	-0.259641	0.0826706	0.000261389	0.0118723	Cbx1
ENSMUSG00000068114	1756.94	0.334805	0.111802	0.000263109	0.0118723	Ccdc134
ENSMUSG00000026196	636.976	0.47846	0.168665	0.000265891	0.0119569	Bard1
ENSMUSG00000028223	669.083	-0.346665	0.116424	0.000267075	0.0119693	Decr1
ENSMUSG00000113965	42.8551	-0.10295	0.198208	0.000273413	0.0122118	A730091E23Rik
ENSMUSG00000028567	1347.1	-0.299953	0.0987851	0.000275421	0.01226	Txndc12
ENSMUSG00000079111	2353.77	-0.226227	0.0710055	0.000279615	0.0124048	Kdelr2
ENSMUSG00000018287	3687.76	-0.223556	0.0703798	0.000281735	0.0124569	Spag7
ENSMUSG00000036636	1588.79	0.313512	0.104051	0.000288242	0.0127019	Clcn7
ENSMUSG00000029735	434.036	-0.473933	0.168963	0.000291169	0.0127456	Tpk1
ENSMUSG00000090258	722.852	-0.366934	0.125968	0.000290715	0.0127456	Churc1
ENSMUSG00000020190	18786.4	0.291597	0.0962243	0.00029807	0.0130045	Mknk2
ENSMUSG00000066170	45.394	0.983278	0.374915	0.000301379	0.0131055	E230001N04Rik
ENSMUSG00000054008	504.39	0.811211	0.305889	0.000304954	0.0132173	Ndst1
ENSMUSG00000026127	4352.52	-0.247725	0.0806187	0.000313499	0.0134989	Imp4
ENSMUSG00000043505	1086.88	-0.323365	0.109661	0.000313135	0.0134989	Gimap5
ENSMUSG00000061436	707.138	0.440399	0.156774	0.000316858	0.0135991	Hipk2
ENSMUSG00000070730	1296.78	-0.263406	0.0862472	0.000323397	0.0138347	Rmdn3
ENSMUSG00000021190	1973.6	-0.416555	0.148545	0.000325492	0.0138792	Lgmn
ENSMUSG00000030166	665.316	-0.325314	0.110483	0.000328782	0.0139743	Rad52
ENSMUSG00000056204	483.293	0.411454	0.14577	0.000330062	0.0139836	Pgpep1
ENSMUSG00000106837	19.2559	2.65282	1.33007	0.000332127	0.014026	D630030B08Rik
ENSMUSG00000040374	1619.79	-0.253359	0.0826799	0.000335028	0.0141033	Pex2
ENSMUSG00000063317	312.29	0.770464	0.295441	0.000344316	0.0144481	Usp31
ENSMUSG00000036977	1774.63	-0.314829	0.107509	0.000348855	0.0145921	Anapc10
ENSMUSG00000034993	42.7922	0.789907	0.303765	0.000353075	0.0147219	Vat1
ENSMUSG00000018983	5704.71	0.349259	0.121579	0.00035463	0.0147401	E2f2
ENSMUSG00000031960	9877.57	0.228624	0.0726052	0.000358046	0.0148353	Aars
ENSMUSG00000044149	225.579	-0.649112	0.248345	0.00036297	0.0149921	Nkrf
ENSMUSG00000024646	2209.96	-0.336135	0.11717	0.000369817	0.0151386	Cyb5a
ENSMUSG00000026576	3984.64	-0.353643	0.124791	0.000368563	0.0151386	Atp1b1
ENSMUSG00000033400	196.406	0.765724	0.296169	0.000371957	0.0151386	Agl
ENSMUSG00000050545	17.9289	-1.46378	0.584627	0.00037226	0.0151386	Fam228b
ENSMUSG00000072235	1552.78	0.239319	0.0783197	0.000372072	0.0151386	Tuba1a
ENSMUSG00000022389	815.106	0.300614	0.102738	0.000375713	0.0152127	Tef
ENSMUSG00000022722	505.87	-0.434085	0.158665	0.000379731	0.0152127	Arl6
ENSMUSG00000025854	40.0158	2.17871	0.8854	0.000379512	0.0152127	Fam20c
ENSMUSG00000029456	152.617	-1.18853	0.488988	0.000379855	0.0152127	Acad10
ENSMUSG00000037791	1384.7	0.397435	0.143091	0.00037716	0.0152127	Phf12
ENSMUSG00000025915	2827.91	-0.293785	0.0999541	0.000384249	0.015342	Sgk3
ENSMUSG00000033931	2262.67	-0.286402	0.0974952	0.000386106	0.0153696	Rbm34
ENSMUSG00000035863	1310.37	0.399455	0.145755	0.000389975	0.0154769	Palm
ENSMUSG00000001027	166.858	0.920278	0.366365	0.000410676	0.0161964	Scn4a
ENSMUSG00000026222	2922.29	-0.320223	0.112081	0.000409586	0.0161964	Sp100
ENSMUSG00000097519	129.62	-1.02236	0.416174	0.000411793	0.0161964	4930558J18Rik
ENSMUSG00000021238	431.215	-0.64282	0.250187	0.000415113	0.0162387	Aldh6a1
ENSMUSG00000053113	156.337	0.728506	0.286745	0.000415333	0.0162387	Socs3
ENSMUSG00000108702	375.317	-0.359951	0.128715	0.00041958	0.0163562	Gm9333
ENSMUSG00000022300	6847.08	-0.269179	0.0911605	0.000424753	0.0164937	Dcaf13
ENSMUSG00000042757	2475.12	0.266414	0.0899283	0.000425936	0.0164937	Tmem108
ENSMUSG00000054150	905.759	0.407167	0.148947	0.000426864	0.0164937	Syne3
ENSMUSG00000032127	2672.97	-0.271664	0.0923458	0.000433764	0.0167113	Vps11
ENSMUSG00000009549	6806.04	-0.195117	0.0623084	0.000435178	0.0167169	Srp14
ENSMUSG00000029863	6514.46	-0.318235	0.112714	0.000437257	0.016748	Casp2
ENSMUSG00000026269	2501.83	0.275412	0.0939	0.000444991	0.0169948	Rnpepl1
ENSMUSG00000019883	114.944	-0.631852	0.247381	0.000451348	0.0171542	Echdc1
ENSMUSG00000046139	2062.11	0.305197	0.106274	0.000451769	0.0171542	Patl1
ENSMUSG00000020056	1292.06	-0.270075	0.0925461	0.000459071	0.0173814	Washc3
ENSMUSG00000042709	3707.78	-0.307184	0.107731	0.000462569	0.0174636	Atpaf2
ENSMUSG00000007777	954.181	-0.284023	0.0981563	0.000467736	0.0175581	0610009B22Rik
ENSMUSG00000021785	5729.27	-0.232301	0.0759444	0.000466436	0.0175581	Ngly1
ENSMUSG00000022351	4593.27	0.248333	0.083639	0.000472308	0.0176793	Sqle
ENSMUSG00000011837	1893.94	0.319926	0.11345	0.000485482	0.0180878	Snapc2
ENSMUSG00000031703	2712.2	-0.264244	0.0911781	0.000485965	0.0180878	Itfg1
ENSMUSG00000038569	100.402	0.836679	0.33999	0.000490061	0.0181888	Rad9b
ENSMUSG00000021665	1173.78	-0.287615	0.100335	0.000491907	0.0182061	Hexb
ENSMUSG00000041187	4971.39	-0.22653	0.0753882	0.000494389	0.0182467	Prkd2
ENSMUSG00000063659	706.099	0.318856	0.113778	0.00050473	0.0185763	Zbtb18
ENSMUSG00000036622	6408.3	0.277928	0.0967952	0.000514102	0.0188686	Atp13a2
ENSMUSG00000002107	10403.1	0.264826	0.0903496	0.000519353	0.018939	Celf2
ENSMUSG00000029254	1813.58	-0.388788	0.144878	0.000520629	0.018939	Stap1
ENSMUSG00000036398	1308.25	-0.288326	0.100776	0.00051948	0.018939	Ppp1r11
ENSMUSG00000049092	86.0497	0.998046	0.431156	0.000521771	0.018939	Gpr137c
ENSMUSG00000048988	104.991	0.901894	0.378371	0.000524663	0.0189917	Elfn1
ENSMUSG00000043411	2870.8	-0.28759	0.102432	0.000527812	0.0190533	Usp48
ENSMUSG00000045532	73.8223	0.955418	0.397761	0.000529397	0.0190583	C1ql1
ENSMUSG00000034390	2125.88	0.319809	0.114902	0.000534225	0.0191797	Cmip
ENSMUSG00000113211	141.577	0.63476	0.255941	0.000537191	0.0192338	4921525O09Rik
ENSMUSG00000030695	7651.67	-0.320398	0.115526	0.000547886	0.0195107	Aldoa
ENSMUSG00000041353	891.395	-0.368396	0.136707	0.000546772	0.0195107	Tmem29
ENSMUSG00000053581	786.724	0.410334	0.155053	0.000550168	0.0195391	Zfand2a
ENSMUSG00000021670	5926.37	0.236359	0.0801532	0.000558203	0.0197712	Hmgcr
ENSMUSG00000011008	466.536	-0.380714	0.142772	0.000567831	0.0199513	Mcoln2
ENSMUSG00000070953	2372.98	-0.242422	0.082567	0.000567688	0.0199513	Rabepk
ENSMUSG00000079659	2482.97	-0.229425	0.0775195	0.000567797	0.0199513	Tmem243
ENSMUSG00000026811	591.887	0.347118	0.128031	0.000571578	0.0200295	St6galnac6
ENSMUSG00000025656	159.427	-0.749208	0.310945	0.000578952	0.020186	Arhgef9
ENSMUSG00000028476	78.2586	-0.845475	0.354772	0.000579105	0.020186	Reck
ENSMUSG00000042345	3888.37	0.275026	0.0967327	0.000580807	0.0201919	Ubash3a
ENSMUSG00000028581	18675.2	0.379573	0.142964	0.000589587	0.0204432	Laptm5
ENSMUSG00000036882	486.177	0.43473	0.167917	0.000591988	0.0204725	Arhgap33
ENSMUSG00000055675	206.335	0.964699	0.41568	0.000599004	0.0206609	Kbtbd11
ENSMUSG00000107136	42.8939	1.55509	0.681279	0.000604339	0.0207905	Gm42466
ENSMUSG00000106951	582.056	0.424898	0.164409	0.000607707	0.020852	5930430L01Rik
ENSMUSG00000020415	1180.66	-0.220774	0.0747513	0.000617948	0.0211483	Pttg1
ENSMUSG00000048310	936.291	-0.261988	0.0919004	0.000625216	0.0213416	Pskh1
ENSMUSG00000071454	1108.73	-0.303077	0.110151	0.000628399	0.0213948	Dtnb
ENSMUSG00000026585	715.784	-0.309279	0.113012	0.000630095	0.0213972	Kifap3
ENSMUSG00000022529	4006.26	0.289721	0.103919	0.000638219	0.0216174	Zfp263
ENSMUSG00000028758	1098.4	0.360317	0.136101	0.000646357	0.0217432	Kif17
ENSMUSG00000031166	535.115	0.620872	0.262797	0.000644713	0.0217432	Wdr13
ENSMUSG00000032463	2568.7	-0.235197	0.0871662	0.000646884	0.0217432	Faim
ENSMUSG00000112082	456.305	-0.397326	0.154112	0.000650567	0.0218114	Gm35035
ENSMUSG00000028927	758.558	0.48892	0.195654	0.000653773	0.0218632	Padi2
ENSMUSG00000024807	11036.9	0.200456	0.066925	0.00065764	0.0219369	Syvn1
ENSMUSG00000027339	1741.89	0.345411	0.129521	0.00066512	0.0221071	Rassf2
ENSMUSG00000052419	2732.68	-0.259954	0.0923386	0.000666098	0.0221071	2610001J05Rik
ENSMUSG00000025268	736.731	0.323001	0.119843	0.000670968	0.0222127	Maged2
ENSMUSG00000001415	3097.84	0.314173	0.116925	0.000677674	0.0223477	Smg5
ENSMUSG00000038604	7824.28	0.283363	0.102243	0.000678437	0.0223477	Ripor1
ENSMUSG00000019942	18046.7	-0.244982	0.0877762	0.000691752	0.0227295	Cdk1
ENSMUSG00000030498	823.687	0.447122	0.178675	0.000697268	0.0228537	Gas2
ENSMUSG00000098715	75.9446	0.666121	0.282877	0.000700265	0.022895	Gm28053
ENSMUSG00000026581	18374.5	-0.357853	0.136188	0.000705798	0.0230188	Sell
ENSMUSG00000053175	86.5549	0.757528	0.326449	0.000708887	0.0230624	Bcl3
ENSMUSG00000022089	1991.12	-0.237126	0.0820814	0.000715498	0.0232111	Bin3
ENSMUSG00000037944	1059.38	-0.359444	0.138351	0.000716978	0.0232111	Ccr7
ENSMUSG00000057411	2351.01	-0.24534	0.0864567	0.000722056	0.0233182	Fam173a
ENSMUSG00000040940	15852.3	0.226083	0.0775577	0.000737926	0.0237724	Arhgef1
ENSMUSG00000013622	1656.9	-0.205203	0.0700503	0.000741425	0.0238269	Atraid
ENSMUSG00000028464	147.87	0.606168	0.256585	0.000761652	0.0243754	Tpm2
ENSMUSG00000108722	201.603	-0.61788	0.263976	0.000762195	0.0243754	Gm34225
ENSMUSG00000079853	61.2232	-1.01716	0.474936	0.00078422	0.0250191	Klra1
ENSMUSG00000042423	183.601	0.556007	0.235291	0.00079957	0.0253859	Fbrs
ENSMUSG00000062110	992.512	-0.268768	0.0974101	0.000798956	0.0253859	Scfd2
ENSMUSG00000106588	33.4889	1.09643	0.49685	0.000804073	0.0254675	Gm17590
ENSMUSG00000006273	4668.35	-0.193978	0.0659261	0.000814346	0.0257086	Atp6v1b2
ENSMUSG00000028655	80.3116	0.979942	0.437017	0.00081559	0.0257086	Mfsd2a
ENSMUSG00000039795	890.003	-0.323642	0.123649	0.000824166	0.025917	Zfand1
ENSMUSG00000027489	43.8789	1.09527	0.502694	0.000830053	0.0260225	Necab3
ENSMUSG00000041258	446.383	0.52212	0.2196	0.000831472	0.0260225	Zfp236
ENSMUSG00000024810	125.597	-0.937862	0.426924	0.000837274	0.0261235	Il33
ENSMUSG00000039621	3582.57	0.415691	0.168239	0.000838663	0.0261235	Prex1
ENSMUSG00000097729	122.71	0.949897	0.433703	0.000851439	0.0264589	2310015A10Rik
ENSMUSG00000024132	1612.63	-0.246983	0.088867	0.000855077	0.0264919	Eci1
ENSMUSG00000031221	1243.09	-0.283023	0.106797	0.000856523	0.0264919	Igbp1
ENSMUSG00000055302	13928.1	-0.213554	0.0744072	0.000858839	0.0265013	Mrfap1
ENSMUSG00000028645	780.597	-0.289145	0.108792	0.000863538	0.0265221	Slc2a1
ENSMUSG00000036402	1456.57	-0.392465	0.158675	0.000862336	0.0265221	Gng12
ENSMUSG00000018189	11319.4	-0.286059	0.108971	0.000871824	0.0265292	Uchl5
ENSMUSG00000018196	994.712	-0.264581	0.0980033	0.000870126	0.0265292	Glrx2
ENSMUSG00000027430	2102.7	-0.233264	0.0842639	0.0008695	0.0265292	Dtd1
ENSMUSG00000039735	35.7587	1.5388	0.726818	0.000866788	0.0265292	Fnbp1l
ENSMUSG00000041390	244.214	0.45233	0.186953	0.000876305	0.0266041	Mdfic
ENSMUSG00000018931	829.435	0.3955	0.158685	0.000883584	0.0266201	Natd1
ENSMUSG00000022802	71.9214	1.05606	0.509505	0.000885298	0.0266201	Lmln
ENSMUSG00000027296	49.8879	0.861863	0.391697	0.00088612	0.0266201	Itpka
ENSMUSG00000033004	1125.29	0.445795	0.184426	0.000886933	0.0266201	Mycbp2
ENSMUSG00000053411	394.844	0.410559	0.167268	0.000881285	0.0266201	Cbx7
ENSMUSG00000024654	2980.97	-0.241804	0.0870895	0.000890444	0.0266515	Asrgl1
ENSMUSG00000043257	847.181	0.30031	0.11319	0.000892026	0.0266515	Pigv
ENSMUSG00000092060	280.85	0.508581	0.21732	0.000894768	0.026673	Bend4
ENSMUSG00000063646	3194.12	0.285005	0.104815	0.000900928	0.026796	Jakmip1
ENSMUSG00000028068	3314.9	0.34449	0.135598	0.000906358	0.026847	Iqgap3
ENSMUSG00000032598	513.562	0.329928	0.128253	0.000906718	0.026847	Nckipsd
ENSMUSG00000024968	1410.76	0.322687	0.125344	0.000919967	0.0270851	Rcor2
ENSMUSG00000035900	3791.47	0.310489	0.119078	0.000920928	0.0270851	Gramd4
ENSMUSG00000044636	238.118	0.481772	0.204118	0.000917469	0.0270851	Csrnp2
ENSMUSG00000030539	352.569	0.499709	0.212518	0.000931753	0.0273425	Sema4b
ENSMUSG00000048271	1311.11	0.412856	0.168914	0.000941182	0.0275578	Rbm33
ENSMUSG00000046909	1157.43	-0.327987	0.128503	0.000953676	0.0278617	Tefm
ENSMUSG00000021103	1292.9	-0.310752	0.120562	0.000966533	0.0281749	Mnat1
ENSMUSG00000022540	651.287	-0.317209	0.123594	0.000970199	0.0282193	Rogdi
ENSMUSG00000062661	726.842	0.49785	0.214551	0.000999086	0.0289318	Ncs1
ENSMUSG00000064215	3805.37	-0.271991	0.102077	0.000998159	0.0289318	Ifi27
ENSMUSG00000018076	1159.27	0.472258	0.202252	0.0010143	0.0291163	Med13l
ENSMUSG00000019792	1846.29	-0.303992	0.120349	0.00101368	0.0291163	Trmt11
ENSMUSG00000031938	258.296	-0.403208	0.167787	0.00101134	0.0291163	4931406C07Rik
ENSMUSG00000102212	118.075	0.817032	0.381604	0.00101199	0.0291163	C230085N15Rik
ENSMUSG00000028890	800.193	0.296403	0.11372	0.00101889	0.0291846	Mtf1
ENSMUSG00000006463	698.445	0.400661	0.167627	0.00107268	0.0306587	Zdhhc24
ENSMUSG00000028337	4958.11	0.272777	0.10199	0.00107936	0.0307827	Coro2a
ENSMUSG00000039599	1204.31	-0.280348	0.107606	0.00108578	0.030899	Fam149b
ENSMUSG00000034593	1313.19	0.444634	0.192408	0.00109338	0.0310482	Myo5a
ENSMUSG00000002345	469.917	-0.368755	0.152021	0.00109781	0.0311069	Borcs8
ENSMUSG00000090841	8976.87	-0.197911	0.0698967	0.00110971	0.0312612	Myl6
ENSMUSG00000094483	1894.96	0.270261	0.10282	0.00110751	0.0312612	Purb
ENSMUSG00000113326	25.3869	1.3174	0.672986	0.00111037	0.0312612	Gm47586
ENSMUSG00000116895	51.2943	-0.626853	0.287237	0.00111822	0.031415	Gm3435
ENSMUSG00000001065	597.654	0.325816	0.130636	0.00112516	0.0315379	Zfp276
ENSMUSG00000087574	217.07	0.510303	0.226513	0.00112738	0.0315379	C030037D09Rik
ENSMUSG00000035215	2049.92	-0.25335	0.0951839	0.00113655	0.0317271	Lsm7
ENSMUSG00000002028	840.961	0.476008	0.20557	0.00114512	0.0318987	Kmt2a
ENSMUSG00000054226	859.127	-0.33369	0.135757	0.00114803	0.0319124	Tprkb
ENSMUSG00000052605	188.767	-0.627959	0.295086	0.00115175	0.0319482	Isoc2b
ENSMUSG00000110902	92.2776	0.559399	0.254572	0.00115578	0.0319928	Gm33104
ENSMUSG00000059316	349.054	0.407743	0.173486	0.00116864	0.0322133	Slc27a4
ENSMUSG00000107336	98.5642	0.54785	0.248049	0.00116672	0.0322133	Gm43461
ENSMUSG00000029776	10232.3	-0.221533	0.0807384	0.00117336	0.0322761	Hibadh
ENSMUSG00000085971	325.835	0.462702	0.20232	0.00118188	0.0324427	Gm15411
ENSMUSG00000027878	103.058	0.872099	0.425575	0.00119384	0.0326348	Notch2
ENSMUSG00000047959	1481.8	0.358517	0.148325	0.00119281	0.0326348	Kcna3
ENSMUSG00000021196	3827.5	-0.228811	0.0835169	0.00121214	0.0329983	Pfkp
ENSMUSG00000038299	5313.29	-0.297376	0.118632	0.0012097	0.0329983	Wdr36
ENSMUSG00000043419	925.764	0.36969	0.155166	0.00121706	0.033064	Chd3os
ENSMUSG00000105646	52.5616	-0.959071	0.473467	0.00122676	0.0332589	Gm30211
ENSMUSG00000002763	2000.8	-0.273588	0.105696	0.00123938	0.033532	Pex6
ENSMUSG00000085385	311.521	-0.42342	0.184451	0.00124301	0.0335612	Snhg17
ENSMUSG00000032396	2098.07	0.301116	0.119292	0.00124947	0.0336115	Dis3l
ENSMUSG00000062031	1200.99	-0.301362	0.120224	0.00124997	0.0336115	Pgghg
ENSMUSG00000076613	33778.8	0.358855	0.147679	0.00125931	0.0337937	Ighg2b
ENSMUSG00000039275	1869.3	0.395724	0.171693	0.00127223	0.034071	Foxk2
ENSMUSG00000027397	1745.16	0.239131	0.090293	0.00128163	0.0342532	Slc20a1
ENSMUSG00000001517	5361.04	0.264191	0.102015	0.00130738	0.034354	Foxm1
ENSMUSG00000012123	197.421	-0.516722	0.237757	0.00129829	0.034354	Crybg2
ENSMUSG00000022427	6994.46	-0.2061	0.0745379	0.00130875	0.034354	Tomm22
ENSMUSG00000030095	3394.38	0.22286	0.0824371	0.00130887	0.034354	Tmem43
ENSMUSG00000030649	340.642	-0.317543	0.129082	0.00128875	0.034354	Anapc15
ENSMUSG00000030678	6213.35	0.259777	0.10008	0.0013037	0.034354	Maz
ENSMUSG00000032688	659.981	-0.535235	0.247266	0.00129358	0.034354	Malt1
ENSMUSG00000051339	2047.87	0.40118	0.174087	0.00129143	0.034354	2900026A02Rik
ENSMUSG00000068758	117.875	-0.725232	0.354528	0.00130026	0.034354	Il3ra
ENSMUSG00000038503	3282.42	-0.22885	0.0854539	0.00131636	0.0344134	Mesd
ENSMUSG00000107092	57.5739	-0.0713639	0.152954	0.00131622	0.0344134	Gm7993
ENSMUSG00000019806	774.862	-0.332112	0.137491	0.00131918	0.0344173	Aig1
ENSMUSG00000041881	3963.41	-0.222784	0.0821521	0.00132173	0.0344173	Ndufa7
ENSMUSG00000042744	368.789	0.528944	0.245395	0.00132513	0.0344377	Hectd4
ENSMUSG00000000711	1644.19	0.354566	0.149587	0.00133102	0.0344548	Rab5b
ENSMUSG00000021959	490.224	0.491067	0.223522	0.00133098	0.0344548	Lats2
ENSMUSG00000031753	2314.16	-0.210748	0.077552	0.00133791	0.0345419	Cog4
ENSMUSG00000034634	11137.3	0.29976	0.120419	0.00134225	0.0345419	Ly6d
ENSMUSG00000073775	1418.5	-0.244233	0.093135	0.00134151	0.0345419	Kti12
ENSMUSG00000001829	2502.32	-0.281577	0.113251	0.00134593	0.0345692	Clpb
ENSMUSG00000022828	1763.3	-0.283083	0.11212	0.00135178	0.0346519	Gtf2e1
ENSMUSG00000041870	23628.6	0.169814	0.0570622	0.00135455	0.0346555	Ankrd13a
ENSMUSG00000056531	1126.47	-0.357697	0.15208	0.00136316	0.0348081	Ccdc18
ENSMUSG00000015247	4335.28	-0.255952	0.0982449	0.00136631	0.0348211	Nipsnap3b
ENSMUSG00000078653	132.728	0.516489	0.239248	0.00137284	0.03492	Cntd1
ENSMUSG00000025040	3648.92	-0.392667	0.173677	0.00138901	0.0352631	Fundc1
ENSMUSG00000021023	1143.54	-0.381102	0.165737	0.00139651	0.0353176	1110008L16Rik
ENSMUSG00000034334	175.343	-0.540511	0.256827	0.00139479	0.0353176	Fam151b
ENSMUSG00000037426	1426.09	0.352875	0.150463	0.00140189	0.0353366	Depdc5
ENSMUSG00000076441	2776.44	0.246	0.0946991	0.00140263	0.0353366	Ass1
ENSMUSG00000079606	130.304	-0.88128	0.452324	0.00141676	0.0356244	Gm595
ENSMUSG00000025366	12606.2	0.247619	0.0886759	0.00142593	0.0357188	Esyt1
ENSMUSG00000035764	2267	0.27572	0.109464	0.00142573	0.0357188	Fbxo45
ENSMUSG00000040033	1567.31	0.275277	0.108735	0.00143743	0.0359384	Stat2
ENSMUSG00000032641	212.583	0.396459	0.174777	0.00144698	0.0361088	Gpr19
ENSMUSG00000001151	1622.71	0.349488	0.149211	0.00145738	0.0362434	Pcnt
ENSMUSG00000028514	1368.83	0.323452	0.134352	0.00146063	0.0362434	Usp24
ENSMUSG00000045287	36.86	1.64945	0.916693	0.00146034	0.0362434	Rtn4rl1
ENSMUSG00000026879	22961.4	0.296021	0.121629	0.0014885	0.0367965	Gsn
ENSMUSG00000098183	94.2468	0.757639	0.38252	0.00148798	0.0367965	Gm27010
ENSMUSG00000025068	3876.88	-0.289792	0.118035	0.0014938	0.0368584	Gsto1
ENSMUSG00000020166	11536.5	-0.188504	0.068475	0.00151467	0.0373033	Cnot2
ENSMUSG00000108314	76.9386	0.581489	0.283373	0.0015439	0.0379524	Prkcz2
ENSMUSG00000068580	1929.27	-0.267994	0.107883	0.00155344	0.0381156	Zfyve19
ENSMUSG00000030839	649.68	-0.29134	0.119529	0.00158198	0.0387437	Sergef
ENSMUSG00000022125	1763.69	-0.237194	0.0912796	0.0015942	0.0387551	Cln5
ENSMUSG00000030246	207.427	-0.568241	0.280468	0.00159218	0.0387551	Ldhb
ENSMUSG00000040212	2136.63	0.245761	0.0956392	0.00159272	0.0387551	Emp3
ENSMUSG00000046480	1134.56	0.524955	0.2521	0.00158667	0.0387551	Scn4b
ENSMUSG00000025780	642.755	-0.423888	0.194339	0.00160212	0.0388756	Itih5
ENSMUSG00000000326	1993.1	-0.239289	0.0928232	0.00160653	0.0389111	Comt
ENSMUSG00000026029	8106.85	-0.270752	0.109071	0.00162644	0.0393211	Casp8
ENSMUSG00000035206	1646.12	0.246255	0.0968793	0.00164212	0.0396275	Sppl2b
ENSMUSG00000030706	2770.37	-0.277874	0.115439	0.00169186	0.040753	Mrpl48
ENSMUSG00000028657	13049.4	-0.210913	0.0795217	0.00170243	0.0409328	Ppt1
ENSMUSG00000002083	87.5769	0.744599	0.39202	0.00172061	0.0410184	Bbc3
ENSMUSG00000006369	129.442	0.820586	0.486259	0.00171722	0.0410184	Fbln1
ENSMUSG00000020700	3096.41	0.293104	0.118448	0.00172095	0.0410184	Map3k3
ENSMUSG00000021621	1047.02	-0.246332	0.0977235	0.00171096	0.0410184	Zcchc9
ENSMUSG00000028563	1428.97	-0.289555	0.120354	0.00172155	0.0410184	Tm2d1
ENSMUSG00000030960	2040.37	-0.252057	0.101088	0.00172657	0.0410638	Eef1akmt2
ENSMUSG00000021418	998.318	-0.324834	0.14053	0.00173783	0.0412571	Rpp40
ENSMUSG00000074785	478.662	0.548508	0.272852	0.00174468	0.0413452	Plxnc1
ENSMUSG00000032116	18544.4	-0.204177	0.0759053	0.00176115	0.0416606	Stt3a
ENSMUSG00000035095	375.068	0.461216	0.219771	0.00177001	0.0417951	Fam167a
ENSMUSG00000048489	37.9785	-1.03571	0.607784	0.00178595	0.0420961	8430408G22Rik
ENSMUSG00000026657	627.736	0.391178	0.183658	0.0017907	0.0421325	Frmd4a
ENSMUSG00000091277	185.254	-0.401107	0.185045	0.00180907	0.042489	Gm1818
ENSMUSG00000045980	444.025	0.308566	0.132469	0.00183964	0.0431301	Tmem104
ENSMUSG00000059336	584.204	-0.387853	0.17627	0.00184806	0.0432506	Slc14a1
ENSMUSG00000022092	3316.61	-0.250846	0.100683	0.00185594	0.043358	Ppp3cc
ENSMUSG00000025408	284.051	0.311264	0.133665	0.00186124	0.0434048	Ddit3
ENSMUSG00000022205	16156.9	-0.274632	0.114279	0.00189141	0.0440303	Sub1
ENSMUSG00000021646	1072.12	-0.25983	0.105872	0.00189781	0.0441015	Mccc2
ENSMUSG00000000365	73.1587	-0.916948	0.525703	0.00190336	0.0441195	Rnf17
ENSMUSG00000014030	2205.86	0.387659	0.183775	0.00191198	0.0441195	Pax5
ENSMUSG00000044700	2069.6	0.272327	0.113143	0.00190943	0.0441195	Tmem201
ENSMUSG00000097011	40.0834	1.29033	0.76914	0.00190699	0.0441195	Gm4651
ENSMUSG00000039497	78.8678	0.92617	0.530927	0.00193907	0.0446663	Dse
ENSMUSG00000036928	537.981	0.407679	0.192508	0.00195534	0.0449625	Stag3
ENSMUSG00000030036	10599.8	-0.188999	0.0723332	0.00196613	0.0449752	Mogs
ENSMUSG00000038374	8960.07	-0.164377	0.0594215	0.00195934	0.0449752	Rbm8a
ENSMUSG00000070639	1223.06	0.378119	0.17587	0.00196611	0.0449752	Lrrc8b
ENSMUSG00000033792	343.393	0.67066	0.367596	0.00198793	0.0453951	Atp7a
ENSMUSG00000021133	740.33	0.458732	0.226612	0.0019979	0.0454652	Susd6
ENSMUSG00000050312	938.28	-0.312149	0.136396	0.00199694	0.0454652	Nsun3
ENSMUSG00000021967	2600.58	-0.206244	0.0787526	0.00200558	0.0455612	Mrpl57
ENSMUSG00000074071	132.201	0.645389	0.366575	0.00203043	0.0460463	Fam169b
ENSMUSG00000031730	1625.27	-0.23734	0.0959249	0.00205031	0.0464174	Dhodh
ENSMUSG00000020846	319.334	0.503601	0.256869	0.00205815	0.0464876	Rflnb
ENSMUSG00000027580	381.362	0.4009	0.190127	0.00206047	0.0464876	Helz2
ENSMUSG00000039958	468.853	-0.279203	0.118541	0.00207006	0.0465445	Etfbkmt
ENSMUSG00000097352	216.364	-0.554835	0.291782	0.00206706	0.0465445	C920009B18Rik
ENSMUSG00000001349	317.934	0.463002	0.231726	0.00208973	0.0469069	Cnn1
ENSMUSG00000095677	2160.6	-0.183019	0.0688384	0.00209549	0.0469561	Dynlt1f
ENSMUSG00000035351	5251.7	-0.2489	0.101908	0.00210435	0.0469947	Nup37
ENSMUSG00000097141	80.2573	0.523287	0.269176	0.00210425	0.0469947	Gm10524
ENSMUSG00000058267	7875.27	-0.244582	0.0999817	0.00211525	0.0471582	Mrps14
ENSMUSG00000030019	2991.54	0.268213	0.112321	0.00211921	0.0471667	Fbxl14
ENSMUSG00000035529	2889.87	0.222206	0.0885957	0.00212363	0.0471855	Prdm4
ENSMUSG00000026278	3688.84	0.296333	0.127928	0.00212892	0.0472234	Bok
ENSMUSG00000034484	43872	-0.236879	0.100445	0.0021555	0.0477325	Snx2
ENSMUSG00000029802	1095.99	-0.25578	0.10664	0.00223339	0.0493745	Abcg2
ENSMUSG00000078490	22.6769	1.20667	0.777827	0.00224187	0.0494788	Cfap74
ENSMUSG00000019087	6482.44	-0.202383	0.0774968	0.00225606	0.0496374	Atp6ap1
ENSMUSG00000108239	15.639	0.0546091	0.139171	0.00225659	0.0496374	Gm19434
ENSMUSG00000002699	355.769	-0.565927	0.307903	0.00228793	0.0498394	Lcp2
ENSMUSG00000027678	1512.71	0.414151	0.203936	0.00228847	0.0498394	Ncoa3
ENSMUSG00000043391	478.928	0.458351	0.235782	0.00228078	0.0498394	2510009E07Rik
ENSMUSG00000044155	5618.34	-0.263504	0.110513	0.00228697	0.0498394	Lsm8
ENSMUSG00000053168	67.0843	-0.751436	0.433437	0.00227647	0.0498394	9030619P08Rik
ENSMUSG00000061904	16615.7	-0.205068	0.0802699	0.00227724	0.0498394	Slc25a3
ENSMUSG00000021537	6608.21	-0.261566	0.11216	0.00230432	0.049893	Cetn3
ENSMUSG00000039686	3346.5	0.217154	0.0861813	0.00230141	0.049893	Zer1
ENSMUSG00000078867	50.2014	-0.820016	0.498981	0.00230082	0.049893	Gm14418
ENSMUSG00000097908	666.107	0.433718	0.21784	0.00230607	0.049893	4933404O12Rik
ENSMUSG00000038398	1937.56	-0.182923	0.0699004	0.00231144	0.0499271	Upf3a
ENSMUSG00000020737	20982	-0.215531	0.0862711	0.00232699	0.0499422	Jpt1
ENSMUSG00000029071	1600.1	0.27337	0.118618	0.00231938	0.0499422	Dvl1
ENSMUSG00000034445	11438.7	0.219081	0.0875757	0.00232555	0.0499422	Cyb561a3
ENSMUSG00000043587	978.881	0.26402	0.111519	0.0023273	0.0499422	Pxylp1
ENSMUSG00000006362	1255.82	0.324417	0.147232	0.00233157	0.0499524	Cbfa2t3
ENSMUSG00000021392	1641.48	-0.260887	0.112264	0.00234726	0.050207	Nol8
ENSMUSG00000020457	14515.6	-0.247895	0.103641	0.00236334	0.0502086	Drg1
ENSMUSG00000034206	619.934	0.498554	0.264666	0.00236639	0.0502086	Polq
ENSMUSG00000042978	3944.13	0.36765	0.171936	0.00236151	0.0502086	Sbk1
ENSMUSG00000051124	2256.93	-0.261345	0.110539	0.002354	0.0502086	Gimap9
ENSMUSG00000086004	17.2786	1.03738	0.637431	0.00236527	0.0502086	Gm7805
ENSMUSG00000015980	374.411	0.322319	0.147227	0.00239173	0.0502624	Lrrc27
ENSMUSG00000021973	4148.22	-0.210531	0.0839942	0.00238989	0.0502624	Micu2
ENSMUSG00000023452	1134.77	-0.241592	0.100534	0.0023816	0.0502624	Pisd
ENSMUSG00000026885	992.293	0.374787	0.180501	0.00239563	0.0502624	Ttll11
ENSMUSG00000028544	58.7646	-0.170164	0.451608	0.00238032	0.0502624	Slc5a9
ENSMUSG00000068523	5845.98	-0.222508	0.0901804	0.00239328	0.0502624	Gng5
ENSMUSG00000097154	308.196	-0.456732	0.236789	0.00237951	0.0502624	Gm26510
ENSMUSG00000034156	200.333	0.754044	0.457081	0.00241894	0.0506573	Tspoap1
ENSMUSG00000079339	368.165	-0.497647	0.265652	0.00242214	0.0506573	Ifit1bl1
ENSMUSG00000023175	11028.2	-0.146999	0.0564649	0.00245294	0.0511391	Bsg
ENSMUSG00000104973	116.64	0.771436	0.480261	0.00245048	0.0511391	A530041M06Rik
ENSMUSG00000027167	1263.97	-0.255067	0.106564	0.00246794	0.0513705	Elp4
ENSMUSG00000020868	643.623	0.293651	0.129648	0.00247632	0.0513716	Xylt2
ENSMUSG00000030443	242.458	0.503081	0.270572	0.00247968	0.0513716	Zfp583
ENSMUSG00000030930	771.533	0.434719	0.222485	0.0024751	0.0513716	Chst15
ENSMUSG00000022774	4252.93	-0.216536	0.0871374	0.00248883	0.0514656	Ncbp2
ENSMUSG00000025925	3609.27	-0.245871	0.10361	0.00249214	0.0514656	Terf1
ENSMUSG00000045410	1517.58	-0.277977	0.121802	0.00249594	0.0514656	Akr1e1
ENSMUSG00000030983	5850.62	-0.218418	0.0893966	0.00250629	0.0515982	Bccip
ENSMUSG00000034312	219.458	0.473629	0.249607	0.00251362	0.0516684	Iqsec1
ENSMUSG00000015961	9593.84	-0.222704	0.089688	0.00252678	0.0517546	Adss
ENSMUSG00000029209	772.419	-0.246814	0.103894	0.00252411	0.0517546	Gnpda2
ENSMUSG00000068417	981.207	-0.334195	0.157285	0.00253745	0.0517546	Pnp2
ENSMUSG00000077493	19.4391	1.0415	0.714101	0.00253346	0.0517546	Snord91a
ENSMUSG00000091931	1044.11	0.232489	0.0960661	0.00253445	0.0517546	Gon7
ENSMUSG00000029416	1515.49	0.259679	0.112058	0.00254469	0.0518219	Slc15a4
ENSMUSG00000021715	1300.4	-0.244638	0.102665	0.00255147	0.0518799	Cwc27
ENSMUSG00000020003	2923.5	-0.264703	0.114544	0.00257074	0.0519511	Pex7
ENSMUSG00000022550	754.649	-0.366628	0.178646	0.00256885	0.0519511	Adck5
ENSMUSG00000032280	2044.97	0.358597	0.173967	0.00257029	0.0519511	Tle3
ENSMUSG00000032285	27.6859	1.33601	0.903302	0.00256985	0.0519511	Dnaja4
ENSMUSG00000029381	16.1211	0.0275552	0.125546	0.00258787	0.0522035	Shroom3
ENSMUSG00000030657	366.1	0.466465	0.245113	0.00259185	0.0522035	Xylt1
ENSMUSG00000046982	1108.82	0.347561	0.165783	0.00259512	0.0522035	Tshz1
ENSMUSG00000022994	21.6271	1.08973	0.75112	0.00261658	0.0525449	Adcy6
ENSMUSG00000062580	3584.09	-0.250345	0.107575	0.00262007	0.0525449	Timm17a
ENSMUSG00000025422	134.695	0.565071	0.322085	0.00264739	0.0529478	Agap2
ENSMUSG00000030527	324.477	0.472192	0.254005	0.00264819	0.0529478	Crtc3
ENSMUSG00000013707	640.744	-0.305384	0.140323	0.00268894	0.0536654	Tnfaip8l2
ENSMUSG00000024726	5505.48	-0.251495	0.108705	0.00269223	0.0536654	Carnmt1
ENSMUSG00000027562	9029.21	-0.285032	0.127863	0.00270042	0.0537473	Car2
ENSMUSG00000001520	41.7901	0.879059	0.658725	0.00270957	0.0537825	Nrip2
ENSMUSG00000001642	12414.2	-0.175711	0.0639201	0.00271443	0.0537825	Akr1b3
ENSMUSG00000029911	5066.92	-0.222071	0.0911244	0.00271259	0.0537825	Ssbp1
ENSMUSG00000047867	9294.09	-0.277501	0.122238	0.00273023	0.0540143	Gimap6
ENSMUSG00000025867	2503.61	0.381306	0.190882	0.00273556	0.0540295	Cplx2
ENSMUSG00000070284	903.964	-0.225118	0.0932604	0.0027392	0.0540295	Gmppb
ENSMUSG00000032193	1637.95	0.380863	0.190619	0.00275109	0.0541021	Ldlr
ENSMUSG00000097042	69.8292	-0.550079	0.312609	0.00274787	0.0541021	Gm17491
ENSMUSG00000024212	2792.3	0.221746	0.0911364	0.00277025	0.0541509	Mllt1
ENSMUSG00000031198	1950.5	-0.231503	0.0972315	0.00276409	0.0541509	Fundc2
ENSMUSG00000032525	2215.16	0.269636	0.118423	0.0027711	0.0541509	Nktr
ENSMUSG00000032946	18236.5	0.204455	0.0822939	0.00277413	0.0541509	Rasgrp2
ENSMUSG00000079020	1466.72	0.294995	0.13438	0.00276172	0.0541509	Slc45a4
ENSMUSG00000041801	605.993	0.391432	0.201902	0.00278144	0.0542134	Phlda3
ENSMUSG00000044730	468.74	0.264648	0.115948	0.00278664	0.0542345	9930104L06Rik
ENSMUSG00000032053	16889.2	-0.202815	0.0809279	0.00279159	0.0542506	Pou2af1
ENSMUSG00000063800	5484.96	-0.173988	0.0669642	0.00280829	0.054495	Prpf38a
ENSMUSG00000004127	1159.25	-0.25222	0.109041	0.00282724	0.0547314	Trmt10a
ENSMUSG00000021596	947.223	-0.33011	0.15944	0.00282933	0.0547314	Mctp1
ENSMUSG00000025766	582.087	-0.410041	0.213317	0.00283294	0.0547314	D3Ertd751e
ENSMUSG00000037432	97.5462	0.637675	0.392021	0.00284903	0.0549618	Fer1l5
ENSMUSG00000034361	1864.4	0.300814	0.137977	0.00285978	0.0550884	Cpne2
ENSMUSG00000090000	1896.76	-0.309462	0.144917	0.00286824	0.0551707	Ier3ip1
ENSMUSG00000031347	4631.56	-0.192783	0.0753471	0.00287845	0.0552229	Cetn2
ENSMUSG00000031935	3175.37	-0.202973	0.0820263	0.00288353	0.0552229	Med17
ENSMUSG00000107000	113.564	0.714526	0.448305	0.00288163	0.0552229	Gm43481
ENSMUSG00000024393	769.807	0.384404	0.19635	0.00289712	0.0554026	Prrc2a
ENSMUSG00000040209	522.407	0.325212	0.155857	0.0029568	0.0564621	Zfp704
ENSMUSG00000033826	702.848	0.312475	0.148006	0.00296979	0.0566279	Dnah8
ENSMUSG00000020922	1858.26	-0.209083	0.0870088	0.00297915	0.0567244	Lsm12
ENSMUSG00000037795	1350.5	0.407376	0.21506	0.00300949	0.0572193	N4bp2
ENSMUSG00000000782	421.667	0.459466	0.253727	0.00303219	0.0574024	Tcf7
ENSMUSG00000032528	89.6827	0.821061	0.567424	0.00303099	0.0574024	Vipr1
ENSMUSG00000034216	1241.46	0.290407	0.133803	0.00302612	0.0574024	Vps18
ENSMUSG00000031633	8111.18	-0.228328	0.0957794	0.00306728	0.0579004	Slc25a4
ENSMUSG00000034471	340.128	0.430846	0.236172	0.0030659	0.0579004	Caskin2
ENSMUSG00000028889	2783.22	-0.193674	0.078301	0.00308039	0.0580646	Yrdc
ENSMUSG00000022014	1170.01	-0.223568	0.0946335	0.00313008	0.0588331	Epsti1
ENSMUSG00000034333	605.825	0.417683	0.223252	0.00312897	0.0588331	Zbed4
ENSMUSG00000021038	1669.04	-0.254311	0.1141	0.00315262	0.0591722	Vipas39
ENSMUSG00000066637	1339.11	-0.27167	0.122536	0.00315821	0.0591929	Ttc32
ENSMUSG00000037601	3780.17	-0.270299	0.128662	0.00316421	0.0592211	Nme1
ENSMUSG00000036606	2210.69	0.344533	0.171938	0.00316871	0.0592212	Plxnb2
ENSMUSG00000067377	3809.86	-0.290247	0.135616	0.00320974	0.059903	Tspan6
ENSMUSG00000041921	988.787	-0.253552	0.112654	0.00322243	0.05997	Metap1d
ENSMUSG00000070436	105.603	0.727817	0.507336	0.00321994	0.05997	Serpinh1
ENSMUSG00000028483	1369.52	-0.212888	0.0887498	0.00323106	0.0600458	Snapc3
ENSMUSG00000005267	289.992	0.356459	0.181871	0.00326742	0.0603519	Zfp287
ENSMUSG00000026032	3619.54	-0.200537	0.08111	0.00325514	0.0603519	Ndufb3
ENSMUSG00000028189	300.804	-0.441609	0.24577	0.00327043	0.0603519	Ctbs
ENSMUSG00000040586	791.25	-0.252846	0.112076	0.00326865	0.0603519	Ofd1
ENSMUSG00000106717	36.5424	0.945284	0.686232	0.00326498	0.0603519	Gm42798
ENSMUSG00000004568	984.285	0.312212	0.150932	0.00328631	0.06056	Arhgef18
ENSMUSG00000036863	197.926	0.566901	0.351989	0.00331446	0.0609935	Syde2
ENSMUSG00000039410	161.626	0.546616	0.333931	0.00332299	0.0610651	Prdm16
ENSMUSG00000021275	247.377	0.706883	0.504168	0.00332844	0.0610802	Tecpr2
ENSMUSG00000028099	3783.46	-0.220965	0.0941351	0.00333919	0.0611072	Polr3c
ENSMUSG00000071660	3324.78	0.186356	0.0751067	0.00333804	0.0611072	Ttc9c
ENSMUSG00000021451	5001.01	0.273895	0.125846	0.00334582	0.0611436	Sema4d
ENSMUSG00000041765	4646.34	-0.163646	0.0637109	0.0033561	0.0611618	Ubac2
ENSMUSG00000049866	185.608	0.458457	0.262531	0.00335375	0.0611618	Arl4c
ENSMUSG00000028252	2287.41	-0.32696	0.164451	0.00336116	0.0611694	Ccnc
ENSMUSG00000095079	328.274	-0.00431028	0.121179	0.00338488	0.0615161	Igha
ENSMUSG00000028059	5124.25	0.223023	0.0950932	0.00339494	0.061614	Arhgef2
ENSMUSG00000034675	38.7824	-0.693214	0.475189	0.00342968	0.0621589	Dbn1
ENSMUSG00000048796	447.781	0.41039	0.226038	0.00344121	0.0622155	Cyb561d1
ENSMUSG00000069910	2194.65	-0.173276	0.0687115	0.00344225	0.0622155	Spdl1
ENSMUSG00000068220	7124.84	0.263118	0.120444	0.00348559	0.0628933	Lgals1
ENSMUSG00000084992	27.6217	-0.107429	0.200369	0.0034893	0.0628933	Gm13842
ENSMUSG00000023330	1409.36	-0.231089	0.100605	0.00351311	0.0630411	Dtwd1
ENSMUSG00000028013	2715.82	-0.219097	0.0935944	0.00351649	0.0630411	Ppa2
ENSMUSG00000028078	522.081	0.358836	0.187924	0.00351664	0.0630411	Dclk2
ENSMUSG00000030724	37686.9	0.157487	0.0611054	0.003509	0.0630411	Cd19
ENSMUSG00000028017	220.776	0.600105	0.399605	0.00354611	0.063483	Egf
ENSMUSG00000030494	18.875	-0.0379028	0.129342	0.00355672	0.0635866	Rhpn2
ENSMUSG00000039246	97.5865	-0.770338	0.568601	0.00356174	0.06359	Lyplal1
ENSMUSG00000071662	4061.42	-0.210309	0.0879654	0.00357669	0.0637705	Polr2g
ENSMUSG00000028788	14604.5	0.150825	0.0579966	0.00359857	0.064074	Ptp4a2
ENSMUSG00000097184	68.9591	0.746368	0.542592	0.00360561	0.0641127	4632428C04Rik
ENSMUSG00000022091	97.2138	0.540997	0.343368	0.00361842	0.0642538	Sorbs3
ENSMUSG00000005362	1755.05	-0.221538	0.0964569	0.00366251	0.0646894	Crbn
ENSMUSG00000034940	805.101	0.336905	0.172933	0.0036496	0.0646894	Synrg
ENSMUSG00000035378	936.484	-0.279865	0.133241	0.00365609	0.0646894	Shq1
ENSMUSG00000083179	175.061	-0.33391	0.170571	0.00366259	0.0646894	Gm12693
ENSMUSG00000035722	903.664	0.351044	0.183892	0.0036704	0.0647405	Abca7
ENSMUSG00000032462	116.938	0.685885	0.515383	0.00367633	0.0647585	Pik3cb
ENSMUSG00000025534	4471.37	-0.213039	0.0907646	0.00369504	0.0649144	Gusb
ENSMUSG00000034210	2503.25	0.22129	0.0954558	0.00369431	0.0649144	Efcab14
ENSMUSG00000029482	2830.3	0.205958	0.0873357	0.00374076	0.0656301	Aacs
ENSMUSG00000047767	2099.11	0.284523	0.136285	0.00375436	0.0657813	Atg16l2
ENSMUSG00000056671	282.755	-0.312896	0.157699	0.00377253	0.0660071	Prelid2
ENSMUSG00000091402	94.7637	0.699411	0.504083	0.00377727	0.0660071	Rd3l
ENSMUSG00000039481	39.7296	0.809022	0.637874	0.00380621	0.0664246	Nrtn
ENSMUSG00000013539	1266.57	-0.231069	0.104259	0.00385189	0.0671329	Tango2
ENSMUSG00000054612	255.574	-0.31899	0.164846	0.00386206	0.0672212	Mgmt
ENSMUSG00000063179	558.565	-0.324229	0.166622	0.00389064	0.0676295	Pstk
ENSMUSG00000015340	92.7556	-0.0788098	0.159637	0.00390546	0.0677826	Cybb
ENSMUSG00000025785	6133.27	-0.238025	0.107494	0.00391767	0.0677826	Exosc7
ENSMUSG00000035171	3774.83	-0.295935	0.144398	0.00392003	0.0677826	1110059E24Rik
ENSMUSG00000104488	21.0137	0.842792	0.661198	0.00391185	0.0677826	Gm38062
ENSMUSG00000027131	1977.73	-0.2327	0.103646	0.00392538	0.0677861	Emc4
ENSMUSG00000002885	3285.14	0.328879	0.169531	0.0039492	0.0681019	Adgre5
ENSMUSG00000052105	16.322	0.0340777	0.127944	0.00395401	0.0681019	Mtcl1
ENSMUSG00000021866	580.38	0.282233	0.136772	0.00398176	0.0684905	Anxa11
ENSMUSG00000032567	587.785	0.289291	0.140827	0.00400446	0.0687911	Aste1
ENSMUSG00000023079	977.612	0.219886	0.096602	0.00402379	0.0690331	Gtf2ird1
ENSMUSG00000025436	939.897	-0.289087	0.143174	0.00403134	0.0690727	Atp23
ENSMUSG00000039943	469.689	-0.394459	0.22587	0.00404714	0.0690739	Plcb4
ENSMUSG00000079215	1878.12	0.274334	0.131501	0.0040432	0.0690739	Zfp664
ENSMUSG00000112805	144.24	-0.572029	0.398714	0.00403862	0.0690739	Gm34574
ENSMUSG00000030956	13661.8	0.315419	0.161947	0.00405756	0.0691622	Fam53b
ENSMUSG00000022521	1830.24	0.290528	0.143249	0.00409598	0.0697269	Crebbp
ENSMUSG00000058013	5590.01	-0.26495	0.125535	0.00410909	0.0698599	Sept11
ENSMUSG00000029436	72.8231	0.866526	0.969578	0.00413691	0.0701614	Mmp17
ENSMUSG00000065990	4107.66	-0.225922	0.0996949	0.00413748	0.0701614	Aurkaip1
ENSMUSG00000029064	14705	-0.179747	0.0739585	0.00415454	0.0703602	Gnb1
ENSMUSG00000028082	299.455	0.520826	0.349998	0.00416317	0.0704158	Sh3d19
ENSMUSG00000019082	1727.57	0.17859	0.0733181	0.00418761	0.0707385	Slc25a22
ENSMUSG00000046897	2260.58	0.294081	0.146908	0.00419842	0.0708302	Zfp740
ENSMUSG00000005804	2093.91	-0.191695	0.0811776	0.00427213	0.0719816	Bloc1s6
ENSMUSG00000024556	11473.8	-0.238676	0.11068	0.00429508	0.0722758	Me2
ENSMUSG00000031337	602.815	-0.311225	0.159686	0.00432951	0.0727623	Mtm1
ENSMUSG00000025134	18404.8	-0.19376	0.0833244	0.00440132	0.0736871	Alyref
ENSMUSG00000030056	1300.16	-0.198432	0.0853461	0.00440117	0.0736871	Isy1
ENSMUSG00000056214	1782.97	0.225438	0.101872	0.00439189	0.0736871	Pard6g
ENSMUSG00000015143	62.0087	0.496418	0.332651	0.0044284	0.073956	Actn1
ENSMUSG00000020654	409.86	0.333883	0.181994	0.00443331	0.073956	Adcy3
ENSMUSG00000046949	830.686	-0.268341	0.129145	0.00443422	0.073956	Nqo2
ENSMUSG00000010453	2687.42	0.296541	0.150863	0.00447969	0.074338	Kansl3
ENSMUSG00000030323	1380.17	0.294043	0.14917	0.00447784	0.074338	Ift122
ENSMUSG00000038384	114.199	0.50426	0.341909	0.00446581	0.074338	Setd1b
ENSMUSG00000051457	2639.06	0.207219	0.0916081	0.00447902	0.074338	Spn
ENSMUSG00000027394	298.616	0.3438	0.189348	0.00449757	0.0745408	Ttl
ENSMUSG00000071855	50.3314	-0.629659	0.498816	0.00450451	0.0745622	Ccdc112
ENSMUSG00000018412	2452.62	0.304642	0.160018	0.00454206	0.0750893	Kansl1
ENSMUSG00000022967	4222.7	0.200012	0.0866984	0.0045595	0.0752832	Ifnar1
ENSMUSG00000028691	53089.4	-0.201824	0.0878712	0.00456767	0.0753237	Prdx1
ENSMUSG00000040565	2808.65	-0.415892	0.259085	0.00458633	0.0755368	Btaf1
ENSMUSG00000031520	55.2042	-0.591733	0.455553	0.00461132	0.0758535	Vegfc
ENSMUSG00000030917	179.915	-0.432543	0.275676	0.0046243	0.0759723	Tmem159
ENSMUSG00000032253	5596.54	0.223503	0.101418	0.0046404	0.0761418	Phip
ENSMUSG00000003161	7758.25	-0.184793	0.0791097	0.00466427	0.0764384	Sri
ENSMUSG00000037991	1890.57	0.259483	0.125713	0.0046729	0.0764846	Rmi2
ENSMUSG00000038990	2481.09	0.210949	0.0942598	0.00467958	0.076499	Cables2
ENSMUSG00000039230	3467.88	-0.20952	0.0927024	0.00468564	0.0765031	Tbcd
ENSMUSG00000062248	7960.94	-0.251802	0.120578	0.00472324	0.0770215	Cks2
ENSMUSG00000029447	32670.5	-0.199657	0.0876055	0.00473413	0.0770594	Cct6a
ENSMUSG00000058135	1246.79	-0.321344	0.177697	0.00473726	0.0770594	Gstm1
ENSMUSG00000005510	4349.38	-0.20005	0.0875038	0.00476172	0.0773483	Ndufs3
ENSMUSG00000019539	224.544	-0.321011	0.174379	0.00476676	0.0773483	Rcn3
ENSMUSG00000051615	138.918	0.596884	0.482819	0.00479194	0.0776612	Rap2a
ENSMUSG00000035370	55.7363	0.606447	0.491835	0.00480863	0.077836	Gm49322
ENSMUSG00000025880	381.512	0.328732	0.180893	0.00483031	0.078091	Smad7
ENSMUSG00000031068	13443.6	-0.185024	0.0856146	0.00486123	0.0783984	Glrx3
ENSMUSG00000085175	125.431	-0.423432	0.271341	0.00485734	0.0783984	Gm11423
ENSMUSG00000026578	876.515	-0.289311	0.149325	0.00487948	0.0784147	Ccdc181
ENSMUSG00000029213	4063.11	-0.23916	0.113562	0.00489199	0.0784147	Commd8
ENSMUSG00000036752	31767.5	-0.155462	0.0639393	0.00489099	0.0784147	Tubb4b
ENSMUSG00000049744	5778.83	-0.218497	0.0994001	0.00487633	0.0784147	Arhgap15
ENSMUSG00000079317	1048.73	-0.326867	0.179626	0.00488296	0.0784147	Trappc2
ENSMUSG00000023243	719.799	0.299117	0.155779	0.00492641	0.0788705	Kcnk5
ENSMUSG00000015937	40769.6	-0.185129	0.080317	0.00493251	0.0788722	H2afy
ENSMUSG00000036632	2116.78	-0.190967	0.0825801	0.00494908	0.0790412	Alg5
ENSMUSG00000016921	21849.2	-0.175006	0.0739535	0.00502804	0.0800786	Srsf6
ENSMUSG00000041272	26.2977	-0.0446509	0.13283	0.00503014	0.0800786	Tox
ENSMUSG00000083596	975.655	-0.205786	0.0923337	0.00503226	0.0800786	Rpl21-ps15
ENSMUSG00000076614	22.3035	0.0276385	0.125414	0.00504929	0.0802526	Ighg1
ENSMUSG00000026819	988.682	0.233624	0.107771	0.00507698	0.0805956	Slc25a25
ENSMUSG00000051232	1649.15	-0.243523	0.119792	0.00511497	0.0811009	Tmem199
ENSMUSG00000024800	4039.67	-0.208392	0.0918174	0.00513906	0.081385	Rpp30
ENSMUSG00000009030	3117.9	-0.244124	0.118094	0.00515167	0.0814014	Pdcl
ENSMUSG00000032549	232.109	0.433617	0.292802	0.00515245	0.0814014	Rab6b
ENSMUSG00000019478	92.6929	0.534927	0.45231	0.00517665	0.0816411	Rab4a
ENSMUSG00000029475	2269.83	0.238112	0.113196	0.00518002	0.0816411	Kdm2b
ENSMUSG00000024072	3103.69	-0.244986	0.119154	0.0052099	0.0820139	Yipf4
ENSMUSG00000024127	975.59	-0.297595	0.160698	0.00522207	0.0821074	Prepl
ENSMUSG00000027630	2966.64	0.267903	0.137767	0.00528125	0.0829389	Tbl1xr1
ENSMUSG00000024664	1208.95	0.302778	0.165236	0.00529792	0.0831016	Fads3
ENSMUSG00000034342	624.139	0.326212	0.184394	0.00531364	0.0832491	Cbl
ENSMUSG00000038544	6729.5	0.129916	0.0505045	0.00532452	0.0833205	Inip
ENSMUSG00000099875	686.953	-0.230758	0.109388	0.00533291	0.0833528	Rbm3-ps
ENSMUSG00000009905	707.099	-0.252534	0.124871	0.00535283	0.083565	Kdsr
ENSMUSG00000020780	9904.1	0.146133	0.0588569	0.00537218	0.0837678	Srp68
ENSMUSG00000075266	2393.13	-0.234813	0.111867	0.00541899	0.0843136	Cenpw
ENSMUSG00000097503	126.084	-0.446178	0.315704	0.00541998	0.0843136	3110045C21Rik
ENSMUSG00000032599	253.64	-0.355612	0.214147	0.00542694	0.0843224	Ip6k2
ENSMUSG00000098900	22.173	0.0499145	0.135556	0.00544244	0.0844635	Gm18190
ENSMUSG00000026887	953.802	-0.299918	0.162405	0.00545452	0.0845514	Mrrf
ENSMUSG00000020092	56.4951	0.734799	2.51997	0.00547469	0.0847396	Pald1
ENSMUSG00000020277	6758.77	-0.198072	0.08939	0.00547952	0.0847396	Pfkl
ENSMUSG00000111394	163.994	0.539133	0.451362	0.00548821	0.0847745	AC160637.1
ENSMUSG00000020936	6284.22	-0.16467	0.0689408	0.005536	0.0852129	Nmt1
ENSMUSG00000028467	1994.08	0.203901	0.0918597	0.00553546	0.0852129	Gba2
ENSMUSG00000037679	128.51	0.432287	0.307471	0.0055294	0.0852129	Inf2
ENSMUSG00000055485	99.6115	0.468149	0.355048	0.00555241	0.0853659	Soga1
ENSMUSG00000042594	3080.04	0.244803	0.120263	0.00558359	0.0857451	Sh2b3
ENSMUSG00000000320	40.4903	0.0107721	0.121786	0.00560659	0.0858982	Alox12
ENSMUSG00000043162	400.231	-0.291021	0.157245	0.00560416	0.0858982	Pyurf
ENSMUSG00000026031	1231.72	0.260882	0.132735	0.00565459	0.0864357	Cflar
ENSMUSG00000106767	22.8466	0.722847	1.13307	0.00565479	0.0864357	Gm42727
ENSMUSG00000019590	75.9024	0.0960738	0.18035	0.00568649	0.0867275	Cyb561
ENSMUSG00000059674	43.3992	0.6459	0.819056	0.00568705	0.0867275	Cdh24
ENSMUSG00000030689	1101.42	0.245404	0.121893	0.00569383	0.0867305	Ino80e
ENSMUSG00000019210	4317.82	-0.188292	0.0832498	0.0057029	0.0867684	Atp6v1e1
ENSMUSG00000013160	3886.84	0.226216	0.105613	0.00572843	0.0868999	Atp6v0d1
ENSMUSG00000016481	4832.57	-0.171687	0.0735471	0.00572597	0.0868999	Cr1l
ENSMUSG00000032121	639.827	-0.292247	0.158676	0.00573793	0.0868999	Tmem218
ENSMUSG00000045441	335.727	0.338677	0.201313	0.00573561	0.0868999	Gprin3
ENSMUSG00000034795	93.205	-0.520312	0.520831	0.00576479	0.0871065	Ccdc122
ENSMUSG00000115219	367.377	-0.276778	0.14615	0.00575862	0.0871065	Eef1akmt4
ENSMUSG00000037922	371.282	-0.310924	0.178104	0.00577171	0.0871112	Bank1
ENSMUSG00000026213	2619.25	0.245776	0.119838	0.0058035	0.087203	Stk11ip
ENSMUSG00000027487	882.869	-0.292802	0.162958	0.00580122	0.087203	Cdk5rap1
ENSMUSG00000031156	1062.14	-0.206066	0.094604	0.00581065	0.087203	Slc35a2
ENSMUSG00000042605	1461.58	0.286023	0.154656	0.00581089	0.087203	Atxn2
ENSMUSG00000078439	450.991	-0.303804	0.17	0.00578491	0.087203	Smim24
ENSMUSG00000040213	941.895	-0.264943	0.138174	0.00581802	0.0872108	Kyat3
ENSMUSG00000004996	2219.13	-0.209032	0.0965157	0.0058266	0.0872401	Mri1
ENSMUSG00000033068	1356.85	-0.219868	0.103838	0.00583787	0.0873096	Entpd6
ENSMUSG00000020955	1310.19	-0.215511	0.100607	0.00585115	0.0873378	Ap4s1
ENSMUSG00000029104	658.136	0.510461	0.433549	0.00585301	0.0873378	Htt
ENSMUSG00000113536	30.5941	0.0838513	0.164906	0.00587144	0.0875137	Gm49327
ENSMUSG00000062075	6946.6	0.183899	0.0813645	0.00588583	0.0876291	Lmnb2
ENSMUSG00000062115	846.445	0.276653	0.147315	0.00592271	0.0880786	Rai1
ENSMUSG00000000738	2785.21	-0.199209	0.0921792	0.00594872	0.0881418	Spg7
ENSMUSG00000022193	5630.67	-0.175842	0.0766633	0.00597379	0.0881418	Psmb5
ENSMUSG00000027651	5297.92	0.163113	0.0691779	0.00595997	0.0881418	Rprd1b
ENSMUSG00000034664	65.8148	0.029877	0.126292	0.00596884	0.0881418	Itga2b
ENSMUSG00000034758	379.952	0.341959	0.207736	0.00596719	0.0881418	Tle6
ENSMUSG00000036611	459.922	0.338883	0.205104	0.00593576	0.0881418	Eepd1
ENSMUSG00000038400	29.0623	0.644938	0.938265	0.00595584	0.0881418	Pmepa1
ENSMUSG00000017765	708.583	0.26529	0.137895	0.00600168	0.0884543	Slc12a4
ENSMUSG00000060373	36167.3	-0.17042	0.0732193	0.00601876	0.0886069	Hnrnpc
ENSMUSG00000001305	2989.59	-0.233958	0.112708	0.00604608	0.0888107	Rrp15
ENSMUSG00000031671	1213.61	-0.214112	0.100473	0.00604255	0.0888107	Setd6
ENSMUSG00000020553	929.855	-0.224539	0.108004	0.00607264	0.0891015	Pctp
ENSMUSG00000001911	436.103	0.335086	0.202358	0.00611355	0.0893039	Nfix
ENSMUSG00000037617	90.7258	0.475303	0.405421	0.00610673	0.0893039	Spag1
ENSMUSG00000041164	2480.98	0.256871	0.13189	0.00611254	0.0893039	Zmiz2
ENSMUSG00000052962	4563.53	-0.186648	0.0854481	0.0061088	0.0893039	Mrpl35
ENSMUSG00000040370	604.455	-0.337106	0.206145	0.00613029	0.0894492	Etfrf1
ENSMUSG00000038642	2654.71	-0.196853	0.0900367	0.00616688	0.0898837	Ctss
ENSMUSG00000038020	154.632	0.439945	0.329303	0.00620299	0.0901136	Rapgefl1
ENSMUSG00000051344	289.834	0.372586	0.242711	0.00620317	0.0901136	Plekhm3
ENSMUSG00000063931	2502.53	-0.208776	0.0978379	0.00619737	0.0901136	Pepd
ENSMUSG00000014349	3168.99	0.15527	0.065439	0.00621746	0.0901984	Ube2z
ENSMUSG00000022751	1824.43	-0.199731	0.0917282	0.00622955	0.0901984	Nit2
ENSMUSG00000092274	136.589	0.426965	0.319845	0.00622817	0.0901984	Neat1
ENSMUSG00000027099	2788.28	-0.235469	0.118071	0.00623646	0.0901993	Mtx2
ENSMUSG00000024228	64.6781	0.528266	0.498115	0.00629631	0.0909651	Nudt12
ENSMUSG00000116908	43.7717	0.109187	0.200673	0.0063233	0.091255	AC154232.2
ENSMUSG00000007035	1236.36	0.225588	0.109334	0.00639408	0.0917422	Msh5
ENSMUSG00000026707	359.728	-0.318062	0.189583	0.00637266	0.0917422	Nsun6
ENSMUSG00000028295	1234.85	-0.195508	0.090768	0.00639212	0.0917422	Smim8
ENSMUSG00000036565	1676.33	0.354161	0.225858	0.00638833	0.0917422	Ttyh3
ENSMUSG00000041530	289.782	0.274395	0.148784	0.00637251	0.0917422	Ago1
ENSMUSG00000054435	2875.01	-0.245826	0.126175	0.00639884	0.0917422	Gimap4
ENSMUSG00000005103	18140.4	-0.1401	0.0591218	0.00645588	0.0922588	Wdr1
ENSMUSG00000029207	169.667	0.405965	0.293047	0.00645332	0.0922588	Apbb2
ENSMUSG00000039450	284.255	-0.295063	0.167168	0.00645101	0.0922588	Dcxr
ENSMUSG00000028678	6639.4	-0.187266	0.0848466	0.00647571	0.092403	Kif2c
ENSMUSG00000040726	24.5015	-0.0956433	0.179518	0.00647999	0.092403	Hesx1
ENSMUSG00000024736	112.587	0.542766	0.808358	0.00648996	0.0924451	Tmem132a
ENSMUSG00000038894	405.413	0.325468	0.19689	0.00650242	0.0925225	Irs2
ENSMUSG00000034109	1347.77	0.254244	0.127531	0.00654676	0.0930529	Golim4
ENSMUSG00000026928	123.424	0.439965	0.352843	0.00657111	0.0932984	Card9
ENSMUSG00000050619	692.382	0.306754	0.179023	0.00660272	0.0936464	Zscan29
ENSMUSG00000027245	57.5571	-0.487057	0.486852	0.00665494	0.0941924	Hypk
ENSMUSG00000040865	381.745	0.283424	0.158569	0.00665552	0.0941924	Ino80d
ENSMUSG00000091625	2047.53	-0.251124	0.131995	0.00667312	0.0942538	Lsm5
ENSMUSG00000091994	84.5138	0.404741	0.300555	0.00667416	0.0942538	E130317F20Rik
ENSMUSG00000058407	5550.13	-0.17035	0.0749789	0.0066914	0.094396	Txndc9
ENSMUSG00000029402	860.355	-0.189179	0.0863851	0.00670561	0.0944318	Snrnp35
ENSMUSG00000044197	446.788	0.319975	0.19478	0.00670827	0.0944318	Gpr146
ENSMUSG00000031666	1582.06	0.271168	0.148805	0.00674531	0.0947778	Rbl2
ENSMUSG00000042323	14350.9	0.189575	0.0871564	0.00674724	0.0947778	Pbrm1
ENSMUSG00000043683	1448.25	0.296868	0.170543	0.00677787	0.0951068	Fem1a
ENSMUSG00000023021	4578.62	-0.182794	0.0817989	0.00683666	0.0957278	Cers5
ENSMUSG00000030064	279.289	0.158909	0.326981	0.00683368	0.0957278	Frmd4b
ENSMUSG00000043289	1047.34	-0.250746	0.133434	0.00685007	0.0958137	Mei4
ENSMUSG00000039220	2194.65	0.209897	0.10045	0.00687029	0.0959946	Ppp1r10
ENSMUSG00000028643	1025.86	-0.216974	0.105667	0.00690163	0.0961851	Svbp
ENSMUSG00000032261	215.903	0.427846	0.34805	0.00689492	0.0961851	Sh3bgrl2
ENSMUSG00000038295	100.977	0.52128	0.615756	0.00691066	0.0961851	Atg9b
ENSMUSG00000055184	658.766	-0.274359	0.153316	0.00691312	0.0961851	Fam72a
ENSMUSG00000004096	6727.93	-0.174729	0.0763767	0.00695896	0.0964122	Cwc15
ENSMUSG00000018012	15.8947	0.0800107	0.160296	0.00697189	0.0964122	Rac3
ENSMUSG00000037552	1041.97	0.311993	0.189286	0.00695729	0.0964122	Plekhg2
ENSMUSG00000037692	106.445	0.511103	0.967157	0.00694918	0.0964122	Ahdc1
ENSMUSG00000049807	112.867	0.447814	0.401378	0.00697335	0.0964122	Arhgap23
ENSMUSG00000083097	630.078	-0.198443	0.0931937	0.00694607	0.0964122	Gm14494
ENSMUSG00000022009	2641.98	-0.236681	0.12249	0.00700558	0.0967564	Nufip1
ENSMUSG00000021483	211.052	0.356978	0.239617	0.00703392	0.0969445	Cdk20
ENSMUSG00000043987	2451.32	0.220343	0.108313	0.00702674	0.0969445	Cep164
ENSMUSG00000046434	23558.6	-0.247798	0.127722	0.00704155	0.0969482	Hnrnpa1
ENSMUSG00000027312	492.781	0.433667	0.366988	0.007051	0.0969771	Atrn
ENSMUSG00000028736	22.8409	0.0695306	0.150029	0.00706195	0.0970105	Pax7
ENSMUSG00000040842	1594.61	0.265239	0.145186	0.00706862	0.0970105	Szrd1
ENSMUSG00000074182	1519.44	-0.212386	0.104569	0.00707552	0.0970105	Znhit6
ENSMUSG00000016624	17.3624	0.0577539	0.140775	0.00708452	0.0970329	Phf21b
ENSMUSG00000028454	1056.28	0.200936	0.0943491	0.00713129	0.097572	Pigo
ENSMUSG00000001518	1675.88	0.20687	0.0993985	0.00717244	0.0980077	Itfg2
ENSMUSG00000021134	15907.1	-0.184921	0.0856122	0.00718544	0.0980077	Srsf5
ENSMUSG00000087370	935.148	0.33163	0.214533	0.00718314	0.0980077	Tmem170b
ENSMUSG00000000957	183.41	-0.312064	0.192731	0.00721696	0.0983358	Mmp14
ENSMUSG00000055067	1258.09	-0.229375	0.117237	0.00723051	0.0984186	Smyd3
ENSMUSG00000106891	192.279	0.360375	0.248613	0.00724099	0.0984595	Gm43460
ENSMUSG00000003541	23.3818	0.0985666	0.183306	0.00725532	0.0985527	Ier3
ENSMUSG00000030583	225.259	0.378128	0.276658	0.0072874	0.0988865	Sipa1l3
ENSMUSG00000020053	61.5336	-0.114407	0.208692	0.00730938	0.0990827	Igf1
ENSMUSG00000003573	865.766	0.246496	0.130776	0.00733989	0.099101	Homer3
ENSMUSG00000042178	1287.89	0.235161	0.12113	0.00734082	0.099101	Armc5
ENSMUSG00000049760	2494.6	-0.207808	0.100488	0.00732515	0.099101	2410015M20Rik
ENSMUSG00000102930	21.1478	0.065021	0.14612	0.00732808	0.099101	Gm38115
ENSMUSG00000042292	1554.38	0.255901	0.13857	0.00736724	0.0992559	Mkl1
ENSMUSG00000064147	446.465	0.417427	0.342618	0.00736736	0.0992559	Rab44
ENSMUSG00000032350	5376.46	-0.205277	0.0965801	0.00737822	0.0993007	Gclc
ENSMUSG00000019945	100.895	-0.461929	0.575904	0.00740187	0.0995021	Cabcoco1
ENSMUSG00000028398	1521.41	-0.177409	0.0805961	0.00740916	0.0995021	Dmac1
ENSMUSG00000037242	12173	0.196242	0.0928557	0.00742339	0.0995021	Clic4
ENSMUSG00000047904	304.268	0.367246	0.268884	0.00742206	0.0995021	Sstr2
ENSMUSG00000001755	1921.17	-0.201795	0.0961851	0.00745509	0.0996585	Coasy
ENSMUSG00000034781	932.386	0.221487	0.110698	0.00745774	0.0996585	Gna11
ENSMUSG00000049728	679.321	0.246854	0.13147	0.00745554	0.0996585	Zfp668
ENSMUSG00000049916	3133.35	-0.203447	0.0980103	0.00748631	0.0998552	2610318N02Rik
ENSMUSG00000050989	772.464	0.310484	0.194221	0.00748763	0.0998552	Selenon
ENSMUSG00000097380	92.4981	0.457789	0.483342	0.00749639	0.0998711	Gm26816
ENSMUSG00000026098	1267.11	-0.248438	0.132748	0.00750753	0.0999184	Pms1
ENSMUSG00000025203	5498.14	0.290416	0.172376	0.00753397	0.0999673	Scd2
ENSMUSG00000028292	3861.68	-0.217457	0.10817	0.00752498	0.0999673	Rars2
ENSMUSG00000028420	85.6229	-0.453974	0.509348	0.00753	0.0999673	Tmem38b
ENSMUSG00000006445	824.693	0.251635	0.136398	0.00756111	0.100227	Epha2
ENSMUSG00000028165	3702.97	-0.214474	0.106612	0.00760781	0.100744	Cisd2
ENSMUSG00000026605	5295.76	0.199386	0.0962989	0.00763737	0.101034	Cenpf
ENSMUSG00000015702	44.8918	-0.115675	0.210619	0.00767418	0.101419	Anxa9
ENSMUSG00000030268	10712.4	0.197468	0.0947954	0.00770548	0.101731	Bcat1
ENSMUSG00000073145	36.8427	0.460549	0.51665	0.00772562	0.101895	Gm12000
ENSMUSG00000054321	1090.21	-0.310262	0.187339	0.0077375	0.101949	Taf4b
ENSMUSG00000025558	875.922	0.324269	0.214564	0.00776424	0.102097	Dock9
ENSMUSG00000031398	124.441	0.126342	0.232781	0.00775836	0.102097	Plxna3
ENSMUSG00000053453	2385.69	-0.18336	0.0840253	0.00778358	0.10225	Thoc7
ENSMUSG00000025764	2687.94	0.281733	0.165631	0.0077997	0.102359	Jade1
ENSMUSG00000038023	2810.01	0.223795	0.113274	0.00782568	0.102496	Atp6v0a2
ENSMUSG00000071226	7321.6	0.235295	0.123142	0.00782554	0.102496	Cecr2
ENSMUSG00000021118	37.0077	0.06868	0.149271	0.00787453	0.103034	Plek2
ENSMUSG00000057113	46438.3	-0.220692	0.112305	0.00788638	0.103086	Npm1
ENSMUSG00000001034	1515.15	0.257553	0.143784	0.00794251	0.103374	Mapk7
ENSMUSG00000008435	322.676	0.313672	0.202427	0.00794634	0.103374	Rdh13
ENSMUSG00000026841	18.8044	0.0434825	0.132107	0.0079548	0.103374	Fibcd1
ENSMUSG00000039994	5046.56	0.16606	0.0737895	0.00795545	0.103374	Timeless
ENSMUSG00000046295	4547.68	0.221805	0.112662	0.00792418	0.103374	Ankle1
ENSMUSG00000053950	1140.62	0.316667	0.206314	0.00792365	0.103374	Adnp2
ENSMUSG00000028322	4964.96	-0.182653	0.0857503	0.00797211	0.103386	Exosc3
ENSMUSG00000031149	311.038	-0.268481	0.154382	0.00797112	0.103386	Praf2
ENSMUSG00000035125	732.176	0.230907	0.120577	0.00800074	0.103656	Gcfc2
ENSMUSG00000027132	1286.02	-0.274076	0.160939	0.00805043	0.103993	Katnbl1
ENSMUSG00000034755	73.2441	0.0797384	0.1595	0.00804068	0.103993	Pcdh11x
ENSMUSG00000046733	98.7057	0.0876753	0.168641	0.00804663	0.103993	Gprc5a
ENSMUSG00000020973	122.836	-0.373637	0.312072	0.00807528	0.104211	Dnaaf2
ENSMUSG00000073609	636.489	0.215474	0.108726	0.00809704	0.10439	D2hgdh
ENSMUSG00000002319	920.653	-0.255257	0.143213	0.00811904	0.104475	Ipo4
ENSMUSG00000041959	4505.77	-0.171198	0.0782146	0.00812307	0.104475	S100a10
ENSMUSG00000061731	998.851	-0.265799	0.152119	0.00812739	0.104475	Ext1
ENSMUSG00000021254	860.019	0.279617	0.165963	0.00814528	0.104603	Gpatch2l
ENSMUSG00000020319	801.317	0.267185	0.151783	0.00823013	0.105589	Wdpcp
ENSMUSG00000018102	381.942	-0.366218	0.297022	0.00825318	0.105782	Hist1h2bc
ENSMUSG00000059060	545.222	-0.251541	0.142336	0.00828746	0.106118	Rad51b
ENSMUSG00000000168	5342.39	-0.164358	0.073858	0.0083081	0.106196	Dlat
ENSMUSG00000079469	405.727	-0.279415	0.166849	0.00830969	0.106196	Pigb
ENSMUSG00000003992	3610.61	-0.166788	0.0757825	0.0083218	0.106248	Ssbp2
ENSMUSG00000042444	1693.99	0.25893	0.146993	0.00834839	0.106484	Mindy2
ENSMUSG00000000826	4675.33	0.226963	0.119231	0.00842308	0.107	Dnajc5
ENSMUSG00000005732	13617.6	-0.207259	0.103958	0.00844472	0.107	Ranbp1
ENSMUSG00000035504	70.3146	0.140821	0.266481	0.00841589	0.107	Reep6
ENSMUSG00000037321	10642.9	0.15491	0.0689847	0.00844568	0.107	Tap1
ENSMUSG00000048534	80.1691	0.156595	0.315035	0.0084258	0.107	Jaml
ENSMUSG00000053768	5533.17	-0.20485	0.10279	0.00844256	0.107	Chchd3
ENSMUSG00000094568	292.776	-0.219216	0.112926	0.00841069	0.107	Smarce1-ps1
ENSMUSG00000023353	1499.81	0.218965	0.112335	0.00850107	0.107289	Agap3
ENSMUSG00000024913	342.582	0.287456	0.176972	0.00848601	0.107289	Lrp5
ENSMUSG00000031176	2157.56	-0.255882	0.144711	0.00848952	0.107289	Dynlt3
ENSMUSG00000040387	64.5238	-0.0838407	0.164059	0.00849598	0.107289	Klhl32
ENSMUSG00000039156	1285.92	0.274458	0.163506	0.00851003	0.1073	Stim2
ENSMUSG00000024483	3013.69	0.24111	0.131437	0.00854659	0.107658	Ankhd1
ENSMUSG00000004552	786.455	-0.280605	0.172136	0.00859616	0.107738	Ctse
ENSMUSG00000015790	1484.03	-0.18317	0.0871081	0.00860206	0.107738	Surf1
ENSMUSG00000040661	156.231	0.3388	0.246776	0.0085743	0.107738	Rad54l2
ENSMUSG00000053963	72.0585	-0.157119	0.311298	0.00858469	0.107738	Stum
ENSMUSG00000074793	63.5363	-0.169288	0.362682	0.00859931	0.107738	Hspa12b
ENSMUSG00000102615	18.3942	0.0365649	0.128801	0.00858458	0.107738	Gm37844
ENSMUSG00000018239	1638.96	-0.247544	0.138961	0.00863438	0.107761	Zcchc10
ENSMUSG00000031109	1005.01	-0.219625	0.114054	0.00861949	0.107761	Enox2
ENSMUSG00000061718	23.6577	0.052017	0.136589	0.00863655	0.107761	Ppp1r1b
ENSMUSG00000078429	2406.44	0.267237	0.15719	0.00862671	0.107761	Ctdsp2
ENSMUSG00000039911	153.741	0.356666	0.281087	0.00867129	0.108092	Spsb1
ENSMUSG00000056820	3544.83	-0.222388	0.116585	0.0087235	0.10864	Tsnax
ENSMUSG00000037971	429.678	-0.241975	0.134859	0.00873208	0.108644	1110032A03Rik
ENSMUSG00000003810	2136.62	0.299112	0.19345	0.00876986	0.108669	Mast2
ENSMUSG00000027957	1262.94	0.311983	0.216102	0.00877216	0.108669	Slc35a3
ENSMUSG00000044390	318.431	0.3049	0.202151	0.00877531	0.108669	Tigd3
ENSMUSG00000057177	2291.13	0.165309	0.0756118	0.00875611	0.108669	Gsk3a
ENSMUSG00000095105	907.869	0.251113	0.142576	0.0087694	0.108669	Edaradd
ENSMUSG00000020652	2876.6	0.170678	0.079025	0.00881011	0.108997	Cenpo
ENSMUSG00000021660	13281.4	-0.166716	0.0767656	0.00883562	0.10921	Btf3
ENSMUSG00000001416	36013	-0.166766	0.0802873	0.00889209	0.109395	Cct3
ENSMUSG00000024538	578.008	-0.269035	0.160592	0.00887455	0.109395	Ppic
ENSMUSG00000026421	14741.8	0.192041	0.0922933	0.00888472	0.109395	Csrp1
ENSMUSG00000032869	2833.55	-0.205823	0.104287	0.00886636	0.109395	Psmf1
ENSMUSG00000033940	6099.37	-0.150767	0.067455	0.00889204	0.109395	Brk1
ENSMUSG00000026427	3165.56	-0.169887	0.0790092	0.00891931	0.109568	Eif2d
ENSMUSG00000032757	2197.4	-0.247224	0.139369	0.0089228	0.109568	Bet1
ENSMUSG00000024997	8721.42	-0.183463	0.0895685	0.00893999	0.109575	Prdx3
ENSMUSG00000031231	6516.73	-0.223176	0.119093	0.00893585	0.109575	Cox7b
ENSMUSG00000022677	4005.16	-0.214079	0.110536	0.00895324	0.109636	Fopnl
ENSMUSG00000105199	19.7048	0.0773102	0.157213	0.00900632	0.110183	Gm43581
ENSMUSG00000008668	20630.3	-0.171014	0.0849207	0.00905381	0.110252	Rps18
ENSMUSG00000028256	792.057	-0.219437	0.116239	0.00905277	0.110252	Odf2l
ENSMUSG00000030188	1229.76	-0.22004	0.11719	0.0090206	0.110252	Magohb
ENSMUSG00000040596	381.808	0.373887	0.338621	0.0090436	0.110252	Pogk
ENSMUSG00000114277	953.249	-0.226803	0.123294	0.00905276	0.110252	Gm48583
ENSMUSG00000009941	36.045	-0.0530374	0.137342	0.00907383	0.110394	Nxf2
ENSMUSG00000001156	419.803	0.333382	0.255709	0.00912229	0.110397	Mxd1
ENSMUSG00000014980	2020.2	-0.200695	0.101186	0.00913269	0.110397	Tsen15
ENSMUSG00000026313	520.245	0.348517	0.278308	0.00912337	0.110397	Hdac4
ENSMUSG00000026723	894.216	-0.2519	0.145337	0.00911851	0.110397	Trdmt1
ENSMUSG00000033105	539.335	-0.26772	0.162082	0.00911546	0.110397	Lss
ENSMUSG00000037280	304.702	0.288649	0.184992	0.00909378	0.110397	Galnt6
ENSMUSG00000038884	883.99	0.212057	0.11072	0.00912438	0.110397	A230050P20Rik
ENSMUSG00000020224	3481.92	-0.175197	0.082104	0.00918175	0.110584	Llph
ENSMUSG00000025278	152.673	-0.348055	1.31057	0.009176	0.110584	Flnb
ENSMUSG00000029376	353.556	-0.313174	0.220545	0.00917053	0.110584	Mthfd2l
ENSMUSG00000047260	4288.84	-0.155568	0.0705702	0.0091669	0.110584	Emc6
ENSMUSG00000034071	45.939	0.066507	0.147038	0.00920019	0.110705	Zfp551
ENSMUSG00000028648	5304.19	-0.165988	0.0775893	0.00923207	0.110886	Ndufs5
ENSMUSG00000045822	534.59	0.266858	0.157728	0.00922641	0.110886	Zswim3
ENSMUSG00000021113	752.966	-0.213464	0.111606	0.00924762	0.110971	Snapc1
ENSMUSG00000028138	11545.6	-0.164099	0.0763528	0.00932048	0.111744	Adh5
ENSMUSG00000037936	6033.35	0.144514	0.0633836	0.00936069	0.112124	Scarb1
ENSMUSG00000023909	157.401	0.362762	0.335704	0.0093793	0.112224	Paqr4
ENSMUSG00000026172	1236.5	-0.211756	0.110315	0.00938605	0.112224	Bcs1l
ENSMUSG00000002804	1116.68	-0.191754	0.0949489	0.00941652	0.112317	Nudt14
ENSMUSG00000015671	19591.6	-0.176354	0.0866708	0.00942468	0.112317	Psma2
ENSMUSG00000023118	3064.08	0.206103	0.105552	0.00942796	0.112317	Sympk
ENSMUSG00000028690	1945.63	-0.186292	0.0894594	0.00940257	0.112317	Mmachc
ENSMUSG00000024420	157.401	0.133306	0.2461	0.0094599	0.112393	Zfp521
ENSMUSG00000030650	58.0352	0.0678389	0.147855	0.00945384	0.112393	Tmc5
ENSMUSG00000033066	615.212	0.346653	0.285317	0.00945509	0.112393	Gas7
ENSMUSG00000000811	7649.92	-0.193297	0.0973948	0.00949575	0.112514	Txnrd3
ENSMUSG00000051351	568.631	0.344859	0.280552	0.00948046	0.112514	Zfp46
ENSMUSG00000102869	3186.2	0.290117	0.186074	0.00949408	0.112514	2900097C17Rik
ENSMUSG00000049680	912.022	0.214265	0.112225	0.00952757	0.11279	Urgcp
ENSMUSG00000017499	9541.95	0.175446	0.0837677	0.00954223	0.11284	Cdc6
ENSMUSG00000038628	6514.66	-0.226983	0.120707	0.00954893	0.11284	Polr3k
ENSMUSG00000037580	759.329	-0.214529	0.112734	0.00957458	0.112941	Gch1
ENSMUSG00000075704	832.631	-0.246365	0.141898	0.00956936	0.112941	Txnrd2
ENSMUSG00000033434	216.98	0.25763	0.154191	0.00963789	0.113543	Gtpbp6
ENSMUSG00000042350	1091.33	0.342687	0.273616	0.00964288	0.113543	Arel1
ENSMUSG00000034321	4006.71	-0.231607	0.128647	0.00965812	0.113621	Exosc1
ENSMUSG00000042055	2486.18	-0.207915	0.10907	0.00972826	0.114344	Wdr11
ENSMUSG00000048279	628.43	0.36956	0.373748	0.0097524	0.114526	Sacs
ENSMUSG00000003316	3565.69	0.199637	0.100986	0.00978192	0.114613	Glg1
ENSMUSG00000024137	1669.68	0.18851	0.0942947	0.00978596	0.114613	E4f1
ENSMUSG00000039473	2591.66	0.255587	0.151739	0.00977966	0.114613	Ubn1
ENSMUSG00000040811	515.721	0.267753	0.165992	0.00982729	0.114995	Eml2
ENSMUSG00000046687	694.735	0.238596	0.134178	0.00985729	0.115244	Gm5424
ENSMUSG00000046562	2753.46	0.15099	0.068361	0.00992208	0.115591	Unc119b
ENSMUSG00000052738	7389.64	-0.180398	0.0911403	0.00991211	0.115591	Suclg1
ENSMUSG00000053801	5132.35	-0.192726	0.0955189	0.00991459	0.115591	Grwd1
ENSMUSG00000103038	21.2038	0.0501212	0.135656	0.0099167	0.115591	Gm37124
ENSMUSG00000022756	27.3333	-0.0539076	0.137966	0.00996276	0.115962	Slc7a4
ENSMUSG00000038587	7773.38	0.261452	0.159542	0.00998666	0.116138	Akap12
ENSMUSG00000005621	2582.4	0.244479	0.14175	0.0100061	0.116262	Zfp592
ENSMUSG00000033526	1077.98	0.234056	0.131941	0.0100187	0.116306	Ppip5k1
ENSMUSG00000078684	137.032	0.371686	0.4249	0.0100363	0.116407	5830417I10Rik
ENSMUSG00000030204	6013.8	-0.129816	0.0561354	0.0100455	0.116411	Ddx47
ENSMUSG00000036501	977.582	0.238452	0.1353	0.0100834	0.116747	Fam13b
ENSMUSG00000015846	299.111	0.32268	0.259023	0.0101629	0.116949	Rxra
ENSMUSG00000018501	7255.95	0.148181	0.0691438	0.0101373	0.116949	Ncor1
ENSMUSG00000024177	2203.92	-0.19151	0.0965291	0.0101123	0.116949	Nme4
ENSMUSG00000029518	1492.17	0.261741	0.160111	0.010148	0.116949	Rab35
ENSMUSG00000032128	191.678	0.320269	0.240614	0.0101559	0.116949	Robo3
ENSMUSG00000046207	1297.02	0.211758	0.112361	0.0101384	0.116949	Pik3r6
ENSMUSG00000054641	3371.21	-0.307485	0.224123	0.0101462	0.116949	Mmrn1
ENSMUSG00000040591	609.263	-0.266009	0.17337	0.0101904	0.117163	1110051M20Rik
ENSMUSG00000082860	34.7214	0.0563192	0.139433	0.0102244	0.117451	Gm13204
ENSMUSG00000015747	1579.22	-0.198579	0.10017	0.0102504	0.117592	Vps45
ENSMUSG00000022255	8497.29	-0.159065	0.0754152	0.0102795	0.117592	Mtdh
ENSMUSG00000026923	742.161	0.363256	0.337846	0.0102606	0.117592	Notch1
ENSMUSG00000038670	97.1681	0.174446	0.368682	0.0102813	0.117592	Mybpc2
ENSMUSG00000048721	131.564	0.296877	0.208407	0.0102718	0.117592	Fndc9
ENSMUSG00000096981	16.2307	-0.0827019	0.162429	0.01036	0.11839	Gm16845
ENSMUSG00000020561	3148.16	-0.199675	0.105014	0.0104088	0.118574	Twistnb
ENSMUSG00000032387	41.3391	0.0509964	0.135925	0.0103894	0.118574	Rbpms2
ENSMUSG00000047139	40317.6	-0.174237	0.0891899	0.0103962	0.118574	Cd24a
ENSMUSG00000061859	665.236	-0.273961	0.17963	0.0104121	0.118574	Patj
ENSMUSG00000022095	894.989	0.24026	0.14022	0.0104473	0.118667	Fam160b2
ENSMUSG00000038486	166.574	0.141381	0.260877	0.0104396	0.118667	Sv2a
ENSMUSG00000059325	260.983	-0.31442	0.249465	0.0104321	0.118667	Hopx
ENSMUSG00000032590	2525.85	-0.182069	0.0899149	0.0104996	0.119055	Apeh
ENSMUSG00000049295	434.42	0.255607	0.156115	0.0104916	0.119055	Zfp219
ENSMUSG00000020898	6106.2	0.156866	0.0738693	0.0105264	0.11914	Ctc1
ENSMUSG00000066000	136.502	-0.0401872	0.130447	0.0105173	0.11914	Zfp979
ENSMUSG00000097377	24.9397	0.039717	0.130095	0.0105342	0.11914	Gm10822
ENSMUSG00000021764	4082.75	-0.145116	0.0658243	0.0105617	0.119349	Ndufs4
ENSMUSG00000020658	37.599	0.0427474	0.131537	0.0105815	0.11947	Efr3b
ENSMUSG00000034620	1503.37	-0.227477	0.127816	0.010618	0.11978	Tmem5
ENSMUSG00000009670	29.0968	0.00743443	0.121396	0.0106441	0.119869	Tex11
ENSMUSG00000043931	1043.23	-0.197509	0.102163	0.010637	0.119869	Gimap7
ENSMUSG00000031505	2490.83	-0.196229	0.101606	0.0106993	0.120387	Naxd
ENSMUSG00000024953	2686.04	-0.197414	0.102616	0.0107304	0.120634	Prdx5
ENSMUSG00000003731	902.293	0.279188	0.187735	0.0107477	0.12072	Kpna6
ENSMUSG00000026799	1091.28	-0.17079	0.0828352	0.0107635	0.12072	Med27
ENSMUSG00000059273	520.822	0.287787	0.200028	0.0107655	0.12072	Zc3h4
ENSMUSG00000006191	1525.93	-0.170962	0.0828489	0.0107925	0.120906	Cdkal1
ENSMUSG00000027313	18.0999	0.0404527	0.13039	0.0108005	0.120906	Chac1
ENSMUSG00000028692	20998.8	0.153652	0.069261	0.0108303	0.120932	Akr1a1
ENSMUSG00000031393	881.15	0.175066	0.0861518	0.0108188	0.120932	Mecp2
ENSMUSG00000103865	1386.97	0.255621	0.15863	0.0108291	0.120932	Gm37416
ENSMUSG00000026245	10776.5	-0.165047	0.0808378	0.010949	0.121947	Farsb
ENSMUSG00000027374	3523.32	-0.160725	0.0759794	0.0109456	0.121947	Mrps5
ENSMUSG00000034201	41.7189	0.0533672	0.137627	0.0109385	0.121947	Gas2l1
ENSMUSG00000030745	1145.66	0.202853	0.106909	0.0109613	0.121981	Il21r
ENSMUSG00000019689	1038.22	-0.221833	0.124255	0.0109892	0.122188	Fmc1
ENSMUSG00000039740	1804.03	-0.18712	0.0950496	0.0110013	0.12222	Alg2
ENSMUSG00000046417	1023	0.218897	0.121175	0.0110227	0.122355	Lrrc75a
ENSMUSG00000031953	58.5499	0.207693	0.513352	0.011053	0.122588	Tmem170
ENSMUSG00000084067	694.391	-0.247895	0.15231	0.0110772	0.122753	Gm14269
ENSMUSG00000089718	589.295	0.249571	0.152307	0.0110901	0.122792	2310075C17Rik
ENSMUSG00000029714	302.94	0.31615	0.26394	0.0111352	0.122879	Gigyf1
ENSMUSG00000033147	84.2494	-0.1255	0.224884	0.0111337	0.122879	Slc22a15
ENSMUSG00000042298	721.939	0.260164	0.165563	0.0111311	0.122879	Ttc19
ENSMUSG00000057230	447.573	0.342473	0.443913	0.0111301	0.122879	Aak1
ENSMUSG00000058444	2344.67	-0.170891	0.0831381	0.011155	0.122994	Map2k5
ENSMUSG00000057421	5716.69	-0.189305	0.0966766	0.0111793	0.123097	Las1l
ENSMUSG00000057572	1663.17	-0.187326	0.094105	0.011183	0.123097	Zbtb8os
ENSMUSG00000024286	2027.19	0.19516	0.101125	0.0112012	0.123194	Ccny
ENSMUSG00000008318	1118.3	0.163882	0.0786962	0.0112751	0.123904	Relt
ENSMUSG00000079260	380.555	0.33597	0.554264	0.0112881	0.123944	Tmppe
ENSMUSG00000023972	156.98	0.136603	0.249486	0.0113493	0.124512	Ptk7
ENSMUSG00000036295	83.0603	-0.0561638	0.139396	0.0113589	0.124514	Lrrn3
ENSMUSG00000078994	351.789	-0.221694	0.126077	0.011414	0.125013	Zfp429
ENSMUSG00000004936	3400.76	-0.170287	0.0854302	0.0114763	0.12529	Map2k1
ENSMUSG00000005078	1112.62	-0.205557	0.112164	0.0114489	0.12529	Jkamp
ENSMUSG00000011267	252.375	-0.2567	0.164449	0.0114773	0.12529	Zfp296
ENSMUSG00000030604	173.278	0.309416	0.256913	0.0114587	0.12529	Zfp626
ENSMUSG00000026853	1010.93	0.184445	0.0941286	0.0114925	0.125352	Crat
ENSMUSG00000017299	1026.75	-0.167307	0.0813797	0.0115236	0.12538	Dnttip1
ENSMUSG00000051998	1118.93	-0.239487	0.144415	0.0115174	0.12538	Lax1
ENSMUSG00000054901	54.2267	-0.332388	0.521394	0.0115215	0.12538	Arhgef33
ENSMUSG00000026425	1642.12	0.250871	0.160703	0.0115728	0.125812	Srgap2
ENSMUSG00000021069	572.74	0.291086	0.223915	0.0115929	0.125823	Pygl
ENSMUSG00000087377	28.136	-0.140249	0.257051	0.0115852	0.125823	AV099323
ENSMUSG00000087272	38.915	0.127979	0.230798	0.011606	0.125861	Gm15409
ENSMUSG00000029672	2271.36	-0.188898	0.0968255	0.0116472	0.126133	Fam3c
ENSMUSG00000043909	1847.61	0.272469	0.187973	0.0116502	0.126133	Trp53bp1
ENSMUSG00000062604	1538.66	0.217506	0.122993	0.0117126	0.126704	Srpk2
ENSMUSG00000012609	1115.47	0.248393	0.155715	0.0117635	0.127046	Ttll5
ENSMUSG00000057541	4556.29	-0.184201	0.100688	0.0117556	0.127046	Pus7
ENSMUSG00000021572	2468.77	0.174209	0.0865946	0.0117886	0.127109	Cep72
ENSMUSG00000070737	495.937	-0.232391	0.134111	0.0117798	0.127109	Tmem35b
ENSMUSG00000034566	9282.42	-0.143416	0.065722	0.0118293	0.127235	Atp5h
ENSMUSG00000049881	1075.47	-0.217769	0.123862	0.0118293	0.127235	2810025M15Rik
ENSMUSG00000070504	386.867	-0.283098	0.667828	0.011829	0.127235	Fcrl6
ENSMUSG00000005672	3898.92	0.23995	0.150779	0.0118931	0.127692	Kit
ENSMUSG00000039648	245.205	-0.324333	0.337798	0.0118948	0.127692	Kyat1
ENSMUSG00000042476	537.881	0.281812	0.204437	0.0119008	0.127692	Abcb4
ENSMUSG00000045639	447.46	0.313059	0.588438	0.0119132	0.12772	Zfp629
ENSMUSG00000035762	597.984	-0.269788	0.188618	0.0120066	0.128512	Tmem161b
ENSMUSG00000040771	2966.36	-0.189128	0.0990013	0.0120066	0.128512	Oard1
ENSMUSG00000031378	3040.45	0.191761	0.100599	0.0120187	0.128538	Abcd1
ENSMUSG00000107096	47.7983	0.0895913	0.169843	0.0120318	0.128574	Gm43597
ENSMUSG00000025283	1939.92	-0.205849	0.113572	0.0120557	0.128724	Sat1
ENSMUSG00000070934	2397.14	-0.198707	0.106431	0.0120745	0.128821	Rraga
ENSMUSG00000074794	1116	-0.270275	0.190855	0.0121204	0.129206	Arrdc3
ENSMUSG00000020116	4364.59	-0.227327	0.133421	0.0121501	0.129209	Pno1
ENSMUSG00000037366	79.4971	-0.10521	0.190503	0.0121459	0.129209	Pafah2
ENSMUSG00000038936	930.299	-0.216341	0.123446	0.0121346	0.129209	Sccpdh
ENSMUSG00000002660	2991.1	-0.193152	0.106029	0.0122024	0.129367	Clpp
ENSMUSG00000022216	9768.94	-0.128506	0.0585184	0.0121897	0.129367	Psme1
ENSMUSG00000031865	4022.88	0.208823	0.115157	0.0121835	0.129367	Dctn1
ENSMUSG00000034863	493.998	0.263198	0.181448	0.0122043	0.129367	Ano8
ENSMUSG00000040843	5168.51	-0.157744	0.07596	0.0122454	0.129699	Tiprl
ENSMUSG00000038387	109.937	0.309426	0.285864	0.0122719	0.129875	Rras
ENSMUSG00000079316	1472.52	-0.183559	0.09479	0.0123105	0.130179	Rab9
ENSMUSG00000019809	1521.17	-0.188823	0.100438	0.0123484	0.130425	Pex3
ENSMUSG00000036561	387.741	0.257816	0.172758	0.0123535	0.130425	Ppp6r2
ENSMUSG00000037434	151.687	0.310053	0.35375	0.0123671	0.130464	Slc30a1
ENSMUSG00000033055	3475.12	0.174373	0.0880153	0.0124231	0.130949	Ankrd54
ENSMUSG00000022889	4436.9	-0.172894	0.0863102	0.0124634	0.131164	Mrpl39
ENSMUSG00000032294	37268.8	-0.201441	0.11017	0.0124568	0.131164	Pkm
ENSMUSG00000024033	293.278	-0.25197	0.165905	0.012484	0.131276	Rsph1
ENSMUSG00000036529	3306.77	0.261295	0.174862	0.0125036	0.131348	Sbf1
ENSMUSG00000052135	20.0697	0.0932778	0.173887	0.0125107	0.131348	Foxo6
ENSMUSG00000020182	405.81	0.280904	0.213652	0.012521	0.131351	Ddc
ENSMUSG00000032051	850.126	-0.199312	0.111377	0.0125412	0.131458	Fdx1
ENSMUSG00000022378	11246.8	-0.179883	0.0928509	0.012585	0.131812	Fam49b
ENSMUSG00000020657	600.204	0.247452	0.158692	0.0126802	0.131933	Dnajc27
ENSMUSG00000021453	73.188	0.318598	0.370608	0.0126668	0.131933	Gadd45g
ENSMUSG00000022463	6265.55	0.198603	0.106181	0.0126556	0.131933	Srebf2
ENSMUSG00000030032	24.5448	0.0772545	0.156474	0.0126867	0.131933	Wdr54
ENSMUSG00000030393	923.084	0.263991	0.183834	0.0126733	0.131933	Zik1
ENSMUSG00000038352	5971.21	-0.19493	0.104557	0.0126517	0.131933	Arl5c
ENSMUSG00000038462	9072.88	-0.169613	0.0898653	0.012664	0.131933	Uqcrfs1
ENSMUSG00000039682	5209.71	-0.16764	0.0839394	0.0126679	0.131933	Lap3
ENSMUSG00000114369	41.8973	0.118989	0.212508	0.012624	0.131933	Gm41077
ENSMUSG00000028229	193.026	-0.294694	0.245478	0.012698	0.131947	Rmdn1
ENSMUSG00000022179	278.076	-0.2621	0.180717	0.0127423	0.132303	4931414P19Rik
ENSMUSG00000029780	3023.34	-0.168837	0.0849443	0.0128182	0.132882	Nt5c3
ENSMUSG00000033721	1495.96	-0.250495	0.165218	0.0128117	0.132882	Vav3
ENSMUSG00000006050	2869.79	-0.187165	0.0982631	0.0128409	0.133012	Sra1
ENSMUSG00000042524	2183.87	0.307509	0.279772	0.0128633	0.13314	Sun2
ENSMUSG00000033538	320.694	-0.302174	0.28276	0.012918	0.133496	Casp4
ENSMUSG00000053916	53.967	0.297396	0.525994	0.0129164	0.133496	Nanp
ENSMUSG00000020689	39.7099	0.0364409	0.128585	0.0129584	0.133809	Itgb3
ENSMUSG00000024349	2521.07	-0.192104	0.098141	0.0129826	0.133954	Tmem173
ENSMUSG00000062995	283.57	-0.26082	0.18351	0.0130329	0.134367	Ica1
ENSMUSG00000040997	958.591	-0.197267	0.10753	0.0130533	0.134367	Abhd4
ENSMUSG00000041974	2105.35	-0.186461	0.099346	0.0130446	0.134367	Spidr
ENSMUSG00000041238	4059.72	-0.133833	0.0609633	0.0130672	0.134405	Rbbp8
ENSMUSG00000039523	1631.28	0.200113	0.110408	0.0131422	0.135072	Cep104
ENSMUSG00000002279	648.866	-0.257689	0.180575	0.0131867	0.135221	Lmf1
ENSMUSG00000025571	485.287	0.305344	0.278668	0.0131875	0.135221	Tnrc6c
ENSMUSG00000033364	2482.93	0.201968	0.11208	0.0131718	0.135221	Usp37
ENSMUSG00000018697	3630.43	-0.209395	0.11872	0.0132203	0.135452	Aatf
ENSMUSG00000042644	1320.14	0.262632	0.194033	0.013242	0.135569	Itpr3
ENSMUSG00000026796	966.603	0.233801	0.14575	0.013281	0.135756	Fam129b
ENSMUSG00000037503	4063.68	0.236838	0.150441	0.0132716	0.135756	Fam168b
ENSMUSG00000044573	5102.88	-0.213187	0.126931	0.0133189	0.136038	Acp1
ENSMUSG00000032526	813.015	-0.200848	0.112269	0.0133597	0.136349	Ss18l2
ENSMUSG00000035397	473.735	0.239451	0.153667	0.0133805	0.136456	Klf16
ENSMUSG00000076281	177.846	0.0458043	0.132797	0.0134058	0.136608	Gm24270
ENSMUSG00000039662	1198.02	0.298462	0.281894	0.0134197	0.136645	Icmt
ENSMUSG00000035203	877.393	0.265244	0.192424	0.0134351	0.136695	Epn1
ENSMUSG00000007670	4543.23	0.195287	0.108063	0.0134526	0.136765	Khsrp
ENSMUSG00000035578	144.278	-0.292919	0.263098	0.0134626	0.136765	Iqcg
ENSMUSG00000002957	4258.57	0.180646	0.0948264	0.0135042	0.137081	Ap2a2
ENSMUSG00000036613	2359.29	-0.189673	0.101711	0.0135172	0.137107	Eipr1
ENSMUSG00000006315	2967.89	-0.196903	0.106903	0.0135466	0.1373	Tmem147
ENSMUSG00000058558	27958.3	-0.199246	0.114081	0.0135652	0.137383	Rpl5
ENSMUSG00000000282	177.193	0.28408	0.234105	0.013604	0.13767	Mnt
ENSMUSG00000021496	348.611	-0.23218	0.145954	0.0136368	0.137896	Pcbd2
ENSMUSG00000078566	539.834	-0.263462	0.196236	0.0136594	0.138018	Bnip3
ENSMUSG00000021643	179.727	-0.258088	0.180776	0.0136832	0.138153	Serf1
ENSMUSG00000074918	2468.41	0.179956	0.0945362	0.0137521	0.138743	Inafm2
ENSMUSG00000018740	186.29	-0.240032	0.163094	0.0137821	0.138939	Slc25a35
ENSMUSG00000015806	1961.19	-0.206824	0.113756	0.0138287	0.139101	Qdpr
ENSMUSG00000020827	283.296	0.255191	0.180353	0.0138191	0.139101	Mink1
ENSMUSG00000085912	36.6297	0.0759481	0.15493	0.0138299	0.139101	Trp53cor1
ENSMUSG00000025939	1677.82	-0.239247	0.157127	0.0138666	0.139152	Ube2w
ENSMUSG00000031629	489.962	-0.23851	0.154835	0.0138564	0.139152	Cenpu
ENSMUSG00000031984	2164.57	-0.174203	0.0905165	0.0138512	0.139152	2810004N23Rik
ENSMUSG00000005982	2370.62	0.134642	0.0628746	0.013896	0.139234	Naa60
ENSMUSG00000029249	2359.33	0.191638	0.104669	0.0138956	0.139234	Rest
ENSMUSG00000060679	3078.08	-0.167911	0.0860438	0.0139141	0.13931	Mrps9
ENSMUSG00000048497	986.389	-0.160755	0.0804656	0.0139317	0.13938	Mmgt2
ENSMUSG00000022747	4820.6	-0.223895	0.13008	0.0139609	0.139461	St3gal6
ENSMUSG00000051234	8472.68	-0.155457	0.0756197	0.0139577	0.139461	Rnf7
ENSMUSG00000062190	3602.01	0.195779	0.108341	0.0140034	0.139779	Lancl2
ENSMUSG00000112808	5323.7	-0.195479	0.10884	0.0140644	0.140282	Gm4739
ENSMUSG00000027422	1678.82	0.202933	0.11658	0.0141663	0.141191	Rrbp1
ENSMUSG00000024835	11240.8	-0.154006	0.0755923	0.0142243	0.141633	Coro1b
ENSMUSG00000025192	398.793	0.257707	0.18903	0.0142321	0.141633	Entpd7
ENSMUSG00000039852	1104.81	0.225122	0.139499	0.0142592	0.141689	Rere
ENSMUSG00000054939	17.3497	0.0319796	0.126789	0.0142488	0.141689	Zfp174
ENSMUSG00000039715	1671.72	0.208983	0.122168	0.0142769	0.141757	Wdr34
ENSMUSG00000019254	2544.84	0.170309	0.0873545	0.0142991	0.141776	Ppp1r12c
ENSMUSG00000021948	13168	0.142911	0.0690175	0.0143002	0.141776	Prkcd
ENSMUSG00000029009	301.461	0.275706	0.23276	0.0143208	0.141873	Mthfr
ENSMUSG00000027933	2242.43	0.196369	0.110547	0.0143582	0.142136	Ints3
ENSMUSG00000019528	1772.69	-0.192481	0.107032	0.0143889	0.142226	Gyg
ENSMUSG00000040652	4433.57	0.112894	0.05108	0.0143882	0.142226	Oaz2
ENSMUSG00000075555	31.9949	-0.0781518	0.156971	0.0144175	0.142403	Gm10863
ENSMUSG00000038372	2967.69	-0.171329	0.0888061	0.0144472	0.142589	Gmds
ENSMUSG00000063382	184.667	0.294651	0.328425	0.0144636	0.142644	Bcl9l
ENSMUSG00000102813	106.204	0.119748	0.212186	0.0145773	0.143658	Gm37795
ENSMUSG00000052395	1335.48	-0.220715	0.127286	0.0145972	0.143747	Rft1
ENSMUSG00000040860	489.335	0.267536	0.210887	0.0146762	0.144417	Crocc
ENSMUSG00000031590	8699.73	-0.153314	0.0762909	0.0146896	0.144441	Frg1
ENSMUSG00000032997	35.4842	-0.0530359	0.137158	0.0147249	0.14468	Chpf
ENSMUSG00000048970	941.655	-0.206231	0.122217	0.0147463	0.144782	C1galt1c1
ENSMUSG00000014932	120.745	0.109851	0.193986	0.0147662	0.14487	Yes1
ENSMUSG00000001948	35.4972	0.139695	0.249899	0.0148036	0.145021	Spa17
ENSMUSG00000099902	327.721	-0.229964	0.152871	0.0148012	0.145021	Gm12115
ENSMUSG00000039701	144.805	-0.184222	0.361399	0.0148199	0.145072	Usp53
ENSMUSG00000006281	902.553	0.202416	0.116858	0.0148743	0.14528	Tep1
ENSMUSG00000047067	310.975	-0.218148	0.134766	0.0148707	0.14528	Dusp28
ENSMUSG00000058230	320.861	0.257428	0.471967	0.0148697	0.14528	Arhgap35
ENSMUSG00000028145	303.186	-0.251548	0.182651	0.0149436	0.145742	Them4
ENSMUSG00000091537	5264.26	-0.157585	0.0788401	0.0149413	0.145742	Tma7
ENSMUSG00000073430	55.2156	-0.0943196	0.174219	0.0149991	0.146174	Gm10505
ENSMUSG00000021242	3571.06	-0.135664	0.064633	0.0150281	0.146263	Npc2
ENSMUSG00000037447	4565.11	0.222006	0.140254	0.0150303	0.146263	Arid5a
ENSMUSG00000029759	860.157	-0.208134	0.12415	0.0150791	0.146602	Pon3
ENSMUSG00000031785	43209.2	0.192688	0.104287	0.0150875	0.146602	Adgrg1
ENSMUSG00000046721	3212.26	-0.183656	0.102134	0.0151419	0.147023	Rpl14-ps1
ENSMUSG00000026009	33.0111	-0.0974362	0.178437	0.0151651	0.147031	Icos
ENSMUSG00000047735	1757.48	0.222565	0.140463	0.015162	0.147031	Samd9l
ENSMUSG00000008475	29074	-0.178876	0.0951486	0.0151869	0.147135	Arpc5
ENSMUSG00000039738	781.658	0.279933	0.263441	0.0152055	0.147206	Slx4
ENSMUSG00000066595	1415.14	-0.232936	0.155625	0.0152364	0.147397	Flvcr1
ENSMUSG00000040760	2922.97	0.191051	0.107449	0.0152992	0.147787	Appl1
ENSMUSG00000095562	28.1437	0.0561467	0.13903	0.0152931	0.147787	Gm21887
ENSMUSG00000026471	655.514	-0.268799	0.244022	0.0153124	0.147807	Mr1
ENSMUSG00000022876	1812.97	-0.212318	0.130417	0.0153257	0.147819	Samsn1
ENSMUSG00000043061	1146.94	-0.191316	0.107931	0.0153362	0.147819	Tmem18
ENSMUSG00000030867	12248.7	-0.156097	0.0794152	0.0153857	0.148084	Plk1
ENSMUSG00000033083	733.921	0.279189	0.252256	0.0153861	0.148084	Tbc1d4
ENSMUSG00000045435	1422.05	-0.161237	0.0826253	0.0154116	0.148221	Tmem60
ENSMUSG00000023800	201.783	0.276944	0.377845	0.0154534	0.148473	Tiam2
ENSMUSG00000031220	25.4865	-0.0621519	0.14315	0.0154603	0.148473	Awat2
ENSMUSG00000005442	271.444	0.282446	0.341788	0.0154975	0.148616	Cic
ENSMUSG00000031939	3191.68	-0.199792	0.113769	0.0155091	0.148616	Taf1d
ENSMUSG00000039262	664.307	0.271638	0.238254	0.0154985	0.148616	Prrc2b
ENSMUSG00000007656	7019.91	0.123041	0.0560814	0.0155471	0.148765	Arpp19
ENSMUSG00000068394	1206.12	0.26698	0.229093	0.0155461	0.148765	Cep152
ENSMUSG00000020530	6144.23	-0.099086	0.0437551	0.0155759	0.148864	Ggnbp2
ENSMUSG00000032046	2158.42	-0.157567	0.0802141	0.0155801	0.148864	Abhd12
ENSMUSG00000044442	882.604	-0.229381	0.154895	0.0156317	0.149248	N6amt1
ENSMUSG00000027133	8555	-0.179419	0.0957696	0.0156704	0.14931	Nop10
ENSMUSG00000034544	2424.84	-0.148609	0.0735115	0.0156618	0.14931	Rsrc1
ENSMUSG00000038732	124.449	-0.152772	0.275751	0.0156823	0.14931	Mboat1
ENSMUSG00000041396	726.824	-0.235952	0.162179	0.0156834	0.14931	Mettl18
ENSMUSG00000015869	4832.08	-0.158762	0.0801433	0.015746	0.149689	Prpsap1
ENSMUSG00000021900	1033.97	-0.184964	0.102719	0.0157394	0.149689	Btd
ENSMUSG00000002221	6334.56	0.170232	0.0899401	0.0157952	0.150048	Paxip1
ENSMUSG00000074582	1398.59	0.26493	0.222849	0.0158112	0.150093	Arfgef2
ENSMUSG00000036931	443.136	0.233234	0.159499	0.0158528	0.150379	Nfkbid
ENSMUSG00000057858	2163.04	-0.2309	0.156674	0.0158904	0.150628	Fam204a
ENSMUSG00000028127	1733.41	0.223953	0.14552	0.015906	0.150666	Abcd3
ENSMUSG00000028974	1611.62	-0.163337	0.0849609	0.0159475	0.150765	Dffa
ENSMUSG00000042997	300.857	-0.276114	0.309955	0.0159507	0.150765	Nhlrc3
ENSMUSG00000084033	21.1882	-0.0859394	0.16468	0.0159332	0.150765	Gm7645
ENSMUSG00000022949	120.291	0.141029	0.251024	0.0160037	0.151158	Clic6
ENSMUSG00000001062	473.148	0.199205	0.117129	0.0160853	0.151264	Vps9d1
ENSMUSG00000020803	3377.47	-0.17065	0.0856028	0.0160759	0.151264	Txndc17
ENSMUSG00000021975	4039.86	-0.13556	0.0656384	0.0161077	0.151264	Ints9
ENSMUSG00000025781	21848.7	-0.154816	0.0789974	0.0161183	0.151264	Atp5c1
ENSMUSG00000026944	1226.68	0.161048	0.296774	0.0160291	0.151264	Abca2
ENSMUSG00000027673	4109.64	-0.182371	0.101538	0.0161047	0.151264	Ndufb5
ENSMUSG00000030127	4963.2	-0.167672	0.0874473	0.016058	0.151264	Cops7a
ENSMUSG00000040877	180.358	-0.275061	0.330435	0.01607	0.151264	Wdr25
ENSMUSG00000103009	795.636	0.221188	0.141371	0.0160543	0.151264	Gm4430
ENSMUSG00000025171	110.335	0.275573	0.271664	0.016171	0.151543	Ubtd1
ENSMUSG00000031422	14781.7	-0.166793	0.0913387	0.0161651	0.151543	Morf4l2
ENSMUSG00000005813	2155.08	-0.165415	0.0884405	0.0162047	0.15175	Metap1
ENSMUSG00000018537	46.5827	0.1503	0.271235	0.016222	0.151791	Pcgf2
ENSMUSG00000030651	23.181	-0.0461219	0.133121	0.0162321	0.151791	Art2b
ENSMUSG00000028318	1594.24	-0.20075	0.1202	0.0162473	0.151826	Polr1e
ENSMUSG00000000563	26365.5	-0.169446	0.0904765	0.0162677	0.151909	Atp5f1
ENSMUSG00000037278	5846.91	-0.179214	0.0979949	0.0162879	0.15199	Tmem97
ENSMUSG00000046380	645.243	0.248984	0.188618	0.0162996	0.151991	Jrk
ENSMUSG00000041037	431.548	0.269875	0.334948	0.0163656	0.152499	Irgq
ENSMUSG00000049562	413.965	0.241494	0.175122	0.0163892	0.152611	Ap5b1
ENSMUSG00000047248	1741.81	0.259942	0.217006	0.0164291	0.152874	C2cd3
ENSMUSG00000034158	2967.92	0.229479	0.156545	0.0164416	0.152883	Lrrc58
ENSMUSG00000041354	2154.32	0.195933	0.114482	0.0164816	0.153029	Rgl2
ENSMUSG00000041840	3339.57	-0.223432	0.145254	0.0164835	0.153029	Haus1
ENSMUSG00000056665	854.012	0.253554	0.200871	0.0165038	0.153029	Them6
ENSMUSG00000107509	42.2138	0.111158	0.196853	0.0165037	0.153029	Gm44941
ENSMUSG00000079184	1647.69	0.168227	0.089703	0.01657	0.153534	Mphosph8
ENSMUSG00000037376	3626.33	-0.194577	0.113742	0.0166158	0.153851	Trmt6
ENSMUSG00000033075	3725.56	0.226535	0.151555	0.0166471	0.154032	Senp1
ENSMUSG00000086837	18.3628	0.0754763	0.15406	0.016665	0.15409	Gm16618
ENSMUSG00000015377	569.688	0.255219	0.207509	0.0166836	0.154153	Dennd6b
ENSMUSG00000029462	5720.28	-0.186823	0.102041	0.0167084	0.154275	Vps29
ENSMUSG00000032112	3153.81	-0.151575	0.0769764	0.016781	0.154836	Trappc4
ENSMUSG00000007415	1629.15	-0.144856	0.0726618	0.0167978	0.154883	Gatad1
ENSMUSG00000054414	1294.61	0.184499	0.10423	0.0168282	0.155055	Slc30a7
ENSMUSG00000049300	945.538	-0.149755	0.0760969	0.0168715	0.155345	Prmt6
ENSMUSG00000015452	18.7638	-0.0868996	0.165411	0.01692	0.155359	Ager
ENSMUSG00000037071	390.639	0.265331	0.277573	0.0168997	0.155359	Scd1
ENSMUSG00000037296	2219.78	-0.146873	0.0742453	0.0168991	0.155359	Lsm1
ENSMUSG00000047417	1949.46	0.215303	0.13834	0.0169201	0.155359	Rexo1
ENSMUSG00000031328	3451.98	-0.177201	0.328945	0.0169345	0.155382	Flna
ENSMUSG00000097164	154.54	0.184389	0.343259	0.0169482	0.1554	Cep83os
ENSMUSG00000012422	6750.45	-0.160174	0.0835717	0.0170225	0.155756	Tmem167
ENSMUSG00000050071	57.4634	-0.165599	0.300289	0.0170032	0.155756	Bex1
ENSMUSG00000112265	30.2838	-0.107439	0.191086	0.0170125	0.155756	Gm34983
ENSMUSG00000028630	1417.04	0.201757	0.12444	0.0170444	0.155848	Dyrk2
ENSMUSG00000022772	764.351	0.241167	0.17903	0.0170738	0.1559	Senp5
ENSMUSG00000078240	77.6673	0.186727	0.350355	0.0170723	0.1559	Gm3550
ENSMUSG00000086691	33.2946	-0.18719	0.352231	0.0170881	0.155923	Gm15432
ENSMUSG00000029038	3110.3	-0.141047	0.0701459	0.0171711	0.156464	Ssu72
ENSMUSG00000073725	1110.87	-0.234289	0.162723	0.0171639	0.156464	Lmbrd1
ENSMUSG00000028683	2231.98	-0.228449	0.156208	0.0172235	0.156833	Eif2b3
ENSMUSG00000026142	1254.49	0.242364	0.184497	0.0172842	0.157277	Rhbdd1
ENSMUSG00000075502	777.718	0.256322	0.22057	0.0173691	0.15794	Kbtbd6
ENSMUSG00000030630	76.5104	-0.202711	0.377371	0.0173998	0.158111	Fah
ENSMUSG00000022614	5560.62	0.14967	0.0785981	0.0174453	0.1582	Lmf2
ENSMUSG00000027284	1682.56	0.214093	0.138523	0.0174496	0.1582	Cdan1
ENSMUSG00000074698	2002.46	0.1791	0.0976476	0.0174417	0.1582	Csnk2a1
ENSMUSG00000097792	87.2569	-0.221216	0.398651	0.0174577	0.1582	Gm27042
ENSMUSG00000000058	1051.34	-0.254657	0.277604	0.017485	0.158339	Cav2
ENSMUSG00000029310	2289.08	-0.143904	0.072943	0.0175422	0.158747	Nudt9
ENSMUSG00000048440	386.783	-0.240826	0.184838	0.017602	0.159179	Cyp4f16
ENSMUSG00000038900	4467	-0.188749	0.111532	0.0176312	0.159334	Rpl12
ENSMUSG00000001016	11812.2	-0.104481	0.048448	0.0177279	0.159345	Ilf2
ENSMUSG00000005981	12728.3	-0.164583	0.0864328	0.0177122	0.159345	Trap1
ENSMUSG00000008206	1308.24	-0.210154	0.133869	0.0176832	0.159345	Cers4
ENSMUSG00000014551	1914.24	-0.157918	0.0839337	0.0177338	0.159345	Mrps25
ENSMUSG00000021076	5053.42	-0.157324	0.0816954	0.0177654	0.159345	Actr10
ENSMUSG00000028607	1156.04	-0.186115	0.107606	0.0177538	0.159345	Cpt2
ENSMUSG00000034525	701.364	0.208504	0.375799	0.0177273	0.159345	Ice1
ENSMUSG00000037548	402.926	-0.260331	0.289816	0.0177122	0.159345	H2-DMb2
ENSMUSG00000040913	58.8522	0.225325	0.402218	0.0177351	0.159345	Fbxw4
ENSMUSG00000042305	4739.4	-0.115506	0.0543654	0.01771	0.159345	Tmem183a
ENSMUSG00000079480	965.763	-0.195858	0.117659	0.0177471	0.159345	Pin4
ENSMUSG00000020102	324.246	0.253471	0.221912	0.0178995	0.160438	Slc16a7
ENSMUSG00000027787	6768.17	-0.208412	0.129117	0.0179175	0.16049	Nmd3
ENSMUSG00000028443	772.256	-0.190351	0.112828	0.017963	0.160788	Nudt2
ENSMUSG00000022814	11875.6	-0.178251	0.096493	0.0180237	0.161113	Umps
ENSMUSG00000043964	1696.8	0.134367	0.0661207	0.0180179	0.161113	Orai3
ENSMUSG00000030654	46451.5	-0.131647	0.0683156	0.0180691	0.161315	Arl6ip1
ENSMUSG00000038555	397.793	0.26072	0.269424	0.0180829	0.161315	Reep2
ENSMUSG00000040270	1504.81	0.238165	0.185275	0.018083	0.161315	Bach2
ENSMUSG00000017697	6363.75	-0.185867	0.101987	0.0181771	0.161487	Ada
ENSMUSG00000019923	6648.37	-0.184496	0.107719	0.0181962	0.161487	Zwint
ENSMUSG00000025076	2957.99	-0.150943	0.0738479	0.0181751	0.161487	Casp7
ENSMUSG00000032249	1863.66	-0.251358	0.230265	0.0181403	0.161487	Anp32a
ENSMUSG00000039480	1348.11	-0.215329	0.144393	0.0181989	0.161487	Nt5dc1
ENSMUSG00000043384	946.627	0.225707	0.156323	0.0182004	0.161487	Gprasp1
ENSMUSG00000054499	817.732	0.176048	0.099376	0.0181765	0.161487	Dedd2
ENSMUSG00000059586	4200.57	-0.16376	0.0954223	0.0181402	0.161487	Nsmce2
ENSMUSG00000028967	75.2273	0.129576	0.224538	0.0182875	0.162042	Errfi1
ENSMUSG00000030357	30615.6	-0.159885	0.0861611	0.0182828	0.162042	Fkbp4
ENSMUSG00000001175	42922.2	-0.14764	0.0733696	0.0183389	0.162354	Calm1
ENSMUSG00000021241	3320.55	-0.194483	0.117719	0.0183818	0.162354	Isca2
ENSMUSG00000022686	1853.89	0.23633	0.180398	0.0183997	0.162354	B3gnt5
ENSMUSG00000033819	1138.12	0.216427	0.14473	0.0184032	0.162354	Ppp1r16a
ENSMUSG00000033909	875.354	0.25166	0.220728	0.0184153	0.162354	Usp36
ENSMUSG00000038291	1288.7	0.198897	0.125105	0.018349	0.162354	Snx25
ENSMUSG00000045659	150.279	0.117586	0.205344	0.0184213	0.162354	Plekha7
ENSMUSG00000069516	5287.57	-0.182896	0.105787	0.0183778	0.162354	Lyz2
ENSMUSG00000031201	4624	-0.187789	0.110884	0.0184441	0.162446	Brcc3
ENSMUSG00000005465	1569.14	0.151269	0.0787251	0.0185706	0.163451	Il27ra
ENSMUSG00000026280	3044.79	-0.164881	0.0891949	0.0186288	0.163854	Atg4b
ENSMUSG00000021127	409.166	0.250427	0.236792	0.0187165	0.164069	Zfp36l1
ENSMUSG00000027634	2413.45	0.139843	0.0706521	0.0186791	0.164069	Ndrg3
ENSMUSG00000031529	1056.39	0.239833	0.350281	0.0186901	0.164069	Tnks
ENSMUSG00000034203	3606	-0.167562	0.0964715	0.018728	0.164069	Chchd4
ENSMUSG00000041769	3100.35	-0.158764	0.0823876	0.0187069	0.164069	Ppp2r2d
ENSMUSG00000098322	53.2177	0.0928399	0.171677	0.0187231	0.164069	5830468F06Rik
ENSMUSG00000000581	6001.48	-0.201375	0.127332	0.0187504	0.164156	C1d
ENSMUSG00000043090	853.421	0.207227	0.133769	0.018818	0.16453	Zfp866
ENSMUSG00000071715	2177.63	-0.192525	0.121163	0.0188119	0.16453	Ncf4
ENSMUSG00000026688	656.125	-0.209065	0.137329	0.0188428	0.164637	Mgst3
ENSMUSG00000022895	518.389	0.252273	0.24277	0.0189046	0.164849	Ets2
ENSMUSG00000024812	615.37	-0.251719	0.239895	0.0188986	0.164849	Tjp2
ENSMUSG00000028647	1729.25	-0.238299	0.193508	0.0188867	0.164849	Mycbp
ENSMUSG00000014867	11652.4	0.116618	0.05499	0.01898	0.165397	Surf4
ENSMUSG00000069662	5846.08	-0.195504	0.126728	0.0190075	0.165527	Marcks
ENSMUSG00000022103	6306.19	0.158003	0.0846717	0.0190741	0.165778	Gfra2
ENSMUSG00000024759	899.718	0.213344	0.144599	0.0190554	0.165778	Atl3
ENSMUSG00000075229	1471.18	-0.176457	0.100505	0.0190638	0.165778	Ccdc58
ENSMUSG00000103197	17.2355	-0.0353427	0.127971	0.0190874	0.165785	Gm37642
ENSMUSG00000026492	1319.29	-0.18664	0.11232	0.0191624	0.166327	Tfb2m
ENSMUSG00000036718	105.595	0.220197	0.366109	0.0191778	0.166351	Micall2
ENSMUSG00000030291	3229.21	-0.165697	0.0908758	0.0192637	0.166876	Med21
ENSMUSG00000043923	809.654	0.201086	0.127601	0.0192565	0.166876	Ccdc84
ENSMUSG00000070697	4353.89	-0.17529	0.0983851	0.0192786	0.166896	Utp3
ENSMUSG00000026525	266.313	0.23434	0.183686	0.0193313	0.166913	Opn3
ENSMUSG00000031683	7647.67	-0.114884	0.0547979	0.019325	0.166913	Lsm6
ENSMUSG00000034247	1070.88	0.219686	0.152484	0.0193289	0.166913	Plekhm1
ENSMUSG00000060166	655.043	0.238016	0.193154	0.0193135	0.166913	Zdhhc8
ENSMUSG00000027931	43.2319	0.185178	0.32781	0.0194111	0.167492	Npr1
ENSMUSG00000008193	3392.03	0.222682	0.158006	0.0194242	0.167495	Spib
ENSMUSG00000062939	1131.04	-0.173758	0.0992755	0.0194458	0.167572	Stat4
ENSMUSG00000038025	1099.23	0.232639	0.178558	0.0194726	0.167693	Phf2
ENSMUSG00000025545	734.001	-0.221964	0.16493	0.0195036	0.167716	Clybl
ENSMUSG00000030798	15025.1	0.131652	0.0662189	0.019518	0.167716	Cd37
ENSMUSG00000031628	3472.45	0.202728	0.130613	0.0195261	0.167716	Casp3
ENSMUSG00000042363	367.792	0.229034	0.171756	0.0195216	0.167716	Lgalsl
ENSMUSG00000026568	2011.26	-0.166781	0.0929247	0.0195559	0.167862	Mpc2
ENSMUSG00000025731	955.921	-0.179967	0.10491	0.0195692	0.167867	Mettl26
ENSMUSG00000026821	1267.97	0.231392	0.181419	0.019649	0.168442	Ralgds
ENSMUSG00000030677	17265.4	-0.158432	0.0858522	0.0196624	0.168448	Kif22
ENSMUSG00000027287	2295.11	-0.191865	0.114397	0.0196788	0.168478	Snap23
ENSMUSG00000022019	1512.43	-0.167764	0.0979157	0.0197419	0.168908	Tdrd3
ENSMUSG00000057130	2546.05	-0.151359	0.0799986	0.0198025	0.169317	Txnl4a
ENSMUSG00000025940	4255.14	-0.18038	0.102602	0.0198158	0.169321	Tmem70
ENSMUSG00000058922	878.139	-0.202013	0.134019	0.0198432	0.169445	Gm10052
ENSMUSG00000009687	4121.82	-0.14725	0.076114	0.0198952	0.169779	Fxyd5
ENSMUSG00000024902	2839.73	-0.158142	0.0860006	0.0199227	0.169794	Mrpl11
ENSMUSG00000028102	1251.88	-0.181027	0.107129	0.0199213	0.169794	Pex11b
ENSMUSG00000013593	11985.5	-0.161685	0.0876335	0.0199363	0.1698	Ndufs2
ENSMUSG00000073468	2332.63	-0.146656	0.0829267	0.0199747	0.170017	Sft2d1
ENSMUSG00000040928	796.425	0.189748	0.116009	0.0199895	0.170034	S100pbp
ENSMUSG00000021265	201.316	0.246364	0.256073	0.0200441	0.170341	Slc25a29
ENSMUSG00000046567	100.677	-0.241676	0.278225	0.0200536	0.170341	4930430F08Rik
ENSMUSG00000046947	352.893	-0.199034	0.13008	0.0200645	0.170341	Adck2
ENSMUSG00000049504	868.645	0.211023	0.143063	0.0201261	0.170645	Proser1
ENSMUSG00000049550	3339.3	0.189574	0.115619	0.0201219	0.170645	Clip1
ENSMUSG00000020817	1800.06	0.133811	0.0676249	0.0201554	0.170709	Rabep1
ENSMUSG00000044408	5434.34	-0.216605	0.152833	0.0201596	0.170709	Sptssa
ENSMUSG00000040225	2983.02	0.169965	0.0968352	0.0202514	0.171376	Prrc2c
ENSMUSG00000073676	5858.78	-0.208618	0.142107	0.0202823	0.171527	Hspe1
ENSMUSG00000017195	53.4747	-0.126447	0.217786	0.0203312	0.17161	Zpbp2
ENSMUSG00000028385	2069.17	0.186942	0.113425	0.0203288	0.17161	Snx30
ENSMUSG00000031545	4493.01	0.133049	0.0670099	0.0203253	0.17161	Gpat4
ENSMUSG00000027804	11804.4	-0.198446	0.122181	0.0203445	0.171613	Ppid
ENSMUSG00000026181	3993.38	0.21352	0.15095	0.0204581	0.172461	Ppm1f
ENSMUSG00000059713	399.565	0.216309	0.334017	0.020472	0.172467	Rcan3
ENSMUSG00000001056	8679.81	-0.174659	0.100119	0.0205035	0.172623	Nhp2
ENSMUSG00000022546	95.581	0.201959	0.332044	0.0205789	0.173147	Gpt
ENSMUSG00000032014	644.37	-0.215337	0.153881	0.0206052	0.173186	Oaf
ENSMUSG00000033213	37.4371	-0.106862	0.188335	0.0206118	0.173186	AA467197
ENSMUSG00000072964	5738.29	0.15816	0.0867249	0.020623	0.173186	Bhlhb9
ENSMUSG00000020993	1860.48	-0.165109	0.0939158	0.0206521	0.17332	Trappc6b
ENSMUSG00000015243	144.975	0.189845	0.329717	0.0207024	0.173631	Abca1
ENSMUSG00000034928	1441.6	0.215516	0.154003	0.0207481	0.173683	Rnf44
ENSMUSG00000035601	727.025	-0.212788	0.155532	0.0207404	0.173683	Trmt10b
ENSMUSG00000051510	447.452	0.223231	0.168898	0.0207246	0.173683	Mafg
ENSMUSG00000018442	2759	-0.123655	0.0609669	0.0208245	0.174212	Derl2
ENSMUSG00000026669	5729.67	0.123082	0.0614148	0.0208416	0.174244	Mcm10
ENSMUSG00000079491	848.181	0.215562	0.155351	0.0208632	0.174314	H2-T10
ENSMUSG00000009621	1650.91	0.203927	0.136472	0.0209344	0.17444	Vav2
ENSMUSG00000020456	15709.6	0.113027	0.0537904	0.0209339	0.17444	Ogdh
ENSMUSG00000038417	3179.92	-0.147251	0.0782245	0.0208924	0.17444	Fig4
ENSMUSG00000039826	1406.61	0.170011	0.0962637	0.0209445	0.17444	Trub2
ENSMUSG00000085704	173.522	-0.237114	0.261445	0.0209096	0.17444	4921531C22Rik
ENSMUSG00000020594	2153.18	0.171639	0.0995859	0.0209876	0.174469	Pum2
ENSMUSG00000023169	5675.01	0.171762	0.0975212	0.0209799	0.174469	Slc38a1
ENSMUSG00000051185	1025.47	-0.217561	0.157759	0.0209644	0.174469	Fam174a
ENSMUSG00000022336	15711.7	-0.160828	0.0898503	0.0210174	0.174606	Eif3e
ENSMUSG00000031641	532.62	-0.218388	0.168571	0.0210837	0.174911	Cbr4
ENSMUSG00000047153	1561.06	0.204537	0.138951	0.0210939	0.174911	Khnyn
ENSMUSG00000052423	568.282	0.212518	0.159452	0.0210723	0.174911	B4galt3
ENSMUSG00000024925	1773.94	-0.19586	0.128015	0.021227	0.175717	Rnaseh2c
ENSMUSG00000089679	38.6159	-0.0906354	0.168468	0.0212312	0.175717	Gm16299
ENSMUSG00000109336	962.447	0.227858	0.185881	0.0212179	0.175717	Samd4b
ENSMUSG00000022309	151.004	-0.0949522	0.17354	0.0212582	0.17572	Angpt1
ENSMUSG00000024829	2288.18	-0.16234	0.0940096	0.0212582	0.17572	Mrpl21
ENSMUSG00000007739	25643	-0.150788	0.0853219	0.0213023	0.175864	Cct4
ENSMUSG00000031805	3577.74	0.191543	0.117987	0.0212936	0.175864	Jak3
ENSMUSG00000039934	436.643	-0.237924	0.224388	0.021317	0.175875	Gsap
ENSMUSG00000047604	416.387	-0.231142	0.205804	0.0213383	0.175941	Frat2
ENSMUSG00000033033	514.981	0.18675	0.116093	0.0213777	0.176156	Calhm2
ENSMUSG00000029505	2102.33	0.189676	0.119805	0.0213918	0.176162	Ep400
ENSMUSG00000032309	1298.75	-0.165646	0.0951436	0.0214428	0.176471	Fbxo22
ENSMUSG00000035212	2380.01	-0.136149	0.0707904	0.0214852	0.176646	Leprot
ENSMUSG00000041220	5828.54	0.162104	0.0890526	0.0214909	0.176646	Elovl6
ENSMUSG00000036721	245.201	-0.236033	0.23897	0.0215066	0.176665	Zscan12
ENSMUSG00000024122	1689.05	0.214018	0.155637	0.0215592	0.176987	Pdpk1
ENSMUSG00000028277	5638.57	-0.191164	0.127695	0.0215778	0.17703	Ube2j1
ENSMUSG00000002797	319.44	-0.209236	0.149769	0.0216344	0.177053	Ggct
ENSMUSG00000015112	1133.66	-0.191181	0.124914	0.021633	0.177053	Slc25a13
ENSMUSG00000025577	3716.54	0.191999	0.123507	0.0215965	0.177053	Cbx2
ENSMUSG00000115819	41.2255	-0.201508	0.328239	0.0216125	0.177053	Gm9108
ENSMUSG00000038543	613.994	-0.22015	0.176726	0.0217141	0.177595	BC028528
ENSMUSG00000031390	18.0488	0.0385016	0.129191	0.0217593	0.177854	Avpr2
ENSMUSG00000021115	9418.57	-0.140681	0.0739805	0.0217761	0.177881	Vrk1
ENSMUSG00000028037	1033.53	-0.233578	0.231198	0.0217985	0.177954	Ifi44
ENSMUSG00000046201	2512.01	0.222483	0.178985	0.0218148	0.177976	Scaf8
ENSMUSG00000030272	260.615	0.211593	0.152591	0.0218544	0.178079	Camk1
ENSMUSG00000064307	17.7051	-0.0910549	0.168605	0.0218425	0.178079	Lrrc51
ENSMUSG00000042505	494.291	-0.226388	0.188908	0.0219	0.17834	Sdhaf3
ENSMUSG00000021482	688.973	-0.213834	0.155598	0.0219679	0.178782	Aaed1
ENSMUSG00000026342	465.951	-0.223825	0.236571	0.0220192	0.179089	Slc35f5
ENSMUSG00000097039	111.218	0.146157	0.248113	0.0220388	0.179138	Pvt1
ENSMUSG00000002190	852.432	-0.22019	0.167176	0.0221107	0.179458	Clgn
ENSMUSG00000009535	4978.03	-0.153417	0.092505	0.0221463	0.179458	Rnmt
ENSMUSG00000031729	5078.84	-0.136431	0.0701236	0.0221399	0.179458	Ist1
ENSMUSG00000032314	10740.5	-0.173459	0.100237	0.0221241	0.179458	Etfa
ENSMUSG00000045216	1182.86	0.213461	0.159003	0.0221069	0.179458	Hs6st1
ENSMUSG00000021257	184.664	-0.229529	0.2593	0.0222326	0.179698	Angel1
ENSMUSG00000027805	262.236	0.190317	0.299661	0.0221956	0.179698	Pfn2
ENSMUSG00000032301	11580.4	-0.15179	0.0889854	0.0222692	0.179698	Psma4
ENSMUSG00000033102	42.6604	-0.0684233	0.147407	0.0222713	0.179698	Cdc14b
ENSMUSG00000062981	8915.19	-0.141576	0.0747001	0.0222082	0.179698	Mrpl42
ENSMUSG00000068391	2649.72	-0.188923	0.119671	0.0222281	0.179698	Chrac1
ENSMUSG00000095597	1262.71	-0.194685	0.128949	0.0222627	0.179698	Gm6472
ENSMUSG00000063457	7011.37	-0.162915	0.0935853	0.0222889	0.17973	Rps15
ENSMUSG00000022391	11387.7	0.126702	0.064737	0.0223395	0.180027	Rangap1
ENSMUSG00000029234	5749.24	-0.147362	0.0797366	0.0223748	0.180174	Tmem165
ENSMUSG00000031843	1512.09	-0.166365	0.0997733	0.0223851	0.180174	Mphosph6
ENSMUSG00000026111	3027.25	-0.154293	0.0848109	0.0224454	0.18044	Unc50
ENSMUSG00000027378	1082.12	-0.181945	0.112482	0.0224336	0.18044	Nphp1
ENSMUSG00000000355	4014.94	-0.174309	0.104791	0.0224648	0.180486	Mcts1
ENSMUSG00000062519	841.336	0.213961	0.161558	0.0225341	0.180932	Zfp398
ENSMUSG00000026490	154.988	0.155648	0.265499	0.0225751	0.181151	Cdc42bpa
ENSMUSG00000032330	6524.67	-0.15986	0.0888775	0.0225918	0.181174	Cox7a2
ENSMUSG00000032883	2268.77	0.180183	0.121089	0.0226217	0.181194	Acsl3
ENSMUSG00000044751	226.005	-0.220904	0.176494	0.0226196	0.181194	Gm12231
ENSMUSG00000025409	163.261	0.227677	0.279654	0.0226571	0.181367	Mbd6
ENSMUSG00000022033	22863.3	-0.177173	0.109176	0.0226909	0.181516	Pbk
ENSMUSG00000037326	520.209	0.229413	0.210238	0.0227033	0.181516	Capn15
ENSMUSG00000054263	59.6729	0.0932608	0.170227	0.0227277	0.181601	Lifr
ENSMUSG00000003382	710.08	0.222518	0.183442	0.0227834	0.181936	Etv3
ENSMUSG00000036860	2307.28	-0.172231	0.10218	0.0228602	0.182328	Mrpl55
ENSMUSG00000037098	217.104	0.230245	0.265197	0.022856	0.182328	Rab11fip3
ENSMUSG00000036944	781.242	-0.227048	0.199067	0.0228749	0.182335	Tmem71
ENSMUSG00000021981	4404.14	-0.166104	0.097886	0.0229019	0.18244	Cab39l
ENSMUSG00000037493	16.534	0.063398	0.143552	0.0230311	0.183165	Cib2
ENSMUSG00000041161	165.182	0.227503	0.262271	0.0230183	0.183165	Otud3
ENSMUSG00000068923	176.089	0.190016	0.314201	0.0230347	0.183165	Syt11
ENSMUSG00000018433	5978.58	-0.163241	0.0950762	0.0230537	0.183206	Nol11
ENSMUSG00000042215	1630.62	-0.163013	0.0943353	0.0230879	0.183367	Bag2
ENSMUSG00000040822	2340.93	-0.177372	0.11025	0.023167	0.183885	1700123O20Rik
ENSMUSG00000024858	32474.5	0.130195	0.0675826	0.0232256	0.183906	Grk2
ENSMUSG00000030852	158.434	-0.184746	0.295355	0.0232203	0.183906	Tacc2
ENSMUSG00000051730	1110.49	-0.173888	0.104721	0.0232003	0.183906	Mettl5
ENSMUSG00000068566	804.56	0.22304	0.199613	0.023196	0.183906	Myadm
ENSMUSG00000024298	638.036	0.207706	0.146105	0.0232409	0.183917	Zfp871
ENSMUSG00000073988	306.321	-0.220947	0.25739	0.0233108	0.184249	Ttpa
ENSMUSG00000084941	44.5782	0.0789658	0.156396	0.023304	0.184249	Gm11944
ENSMUSG00000020601	378.771	-0.0496762	0.134474	0.0233444	0.184404	Trib2
ENSMUSG00000031150	137.854	0.202067	0.309949	0.0233645	0.184452	Ccdc120
ENSMUSG00000075376	556.069	0.211278	0.160655	0.02343	0.184858	Rc3h2
ENSMUSG00000041625	108.474	-0.228439	0.224701	0.0235092	0.184946	Ggact
ENSMUSG00000048332	37.5081	0.0325248	0.126766	0.0235112	0.184946	Lhfp
ENSMUSG00000096954	158.317	0.100488	0.179464	0.0234913	0.184946	Gdap10
ENSMUSG00000108732	18.3535	0.0362096	0.128239	0.023469	0.184946	2310043P16Rik
ENSMUSG00000112825	579.2	-0.192798	0.128922	0.0234973	0.184946	Gm9118
ENSMUSG00000020227	1342.35	-0.161039	0.0932393	0.0235636	0.185026	Irak3
ENSMUSG00000052428	6273.59	-0.17684	0.109809	0.023553	0.185026	Tmco1
ENSMUSG00000059142	846.876	-0.226702	0.233669	0.0235448	0.185026	Zfp945
ENSMUSG00000051790	86.0139	0.218076	0.292191	0.023602	0.185217	Nlgn2
ENSMUSG00000024034	454.16	-0.224622	0.204431	0.0236628	0.185584	Tmprss3
ENSMUSG00000017412	16.882	-0.0402652	0.129856	0.023679	0.185601	Cacnb4
ENSMUSG00000048696	179.645	0.226399	0.211485	0.0237438	0.185998	Mex3d
ENSMUSG00000045409	845.445	0.197721	0.135122	0.023764	0.186045	Trim39
ENSMUSG00000044452	346.984	0.190107	0.301696	0.0238911	0.186819	Zfp507
ENSMUSG00000086610	99.1767	0.205207	0.298116	0.0238779	0.186819	Gm15408
ENSMUSG00000024143	709.706	0.199344	0.303856	0.0239425	0.187094	Rhoq
ENSMUSG00000028893	161.904	0.220183	0.241371	0.0239547	0.187094	Sesn2
ENSMUSG00000053460	484.078	-0.19778	0.139989	0.0240058	0.187382	Ggcx
ENSMUSG00000042396	7425.05	-0.171092	0.108802	0.0240284	0.187447	Rbm7
ENSMUSG00000040430	809.548	0.216334	0.181379	0.0240518	0.187519	Pitpnc1
ENSMUSG00000057147	2088.48	-0.167548	0.101263	0.0241056	0.187827	Dph6
ENSMUSG00000021619	595.489	-0.20915	0.160402	0.0241224	0.187847	Atg10
ENSMUSG00000018995	1286.71	-0.179126	0.113144	0.0241571	0.187895	Nars2
ENSMUSG00000037788	445.312	0.212351	0.167275	0.0241547	0.187895	Vopp1
ENSMUSG00000024273	1049.94	-0.197619	0.138612	0.024176	0.187931	2700062C07Rik
ENSMUSG00000020124	10555.2	-0.141095	0.0768053	0.0242524	0.188301	Usp15
ENSMUSG00000028568	3056.44	-0.181077	0.114134	0.0242665	0.188301	Btf3l4
ENSMUSG00000032120	602.864	0.22355	0.212583	0.0242473	0.188301	C2cd2l
ENSMUSG00000018999	2424.63	0.159685	0.0926704	0.0242983	0.188301	Slc35b4
ENSMUSG00000022771	7528.28	-0.129311	0.0680961	0.0242833	0.188301	Ppil2
ENSMUSG00000041891	5693.96	-0.159659	0.0933474	0.0243094	0.188301	Lman1
ENSMUSG00000022109	2557.88	-0.173763	0.107715	0.0243277	0.188332	Med4
ENSMUSG00000032329	1986.21	0.136351	0.0722558	0.0243424	0.188335	Hmg20a
ENSMUSG00000024357	1839.1	-0.180098	0.117002	0.0243866	0.188456	Sil1
ENSMUSG00000078970	1647.36	-0.152507	0.0890222	0.0243799	0.188456	Wdr92
ENSMUSG00000024002	4801.55	0.175982	0.107427	0.0245096	0.189296	Brd4
ENSMUSG00000030741	1563.84	0.153391	0.0866844	0.0245247	0.189301	Spns1
ENSMUSG00000009907	8920.97	-0.147107	0.0867783	0.0245831	0.189386	Vps4b
ENSMUSG00000020612	23499.3	-0.10751	0.0534139	0.0246027	0.189386	Prkar1a
ENSMUSG00000024942	937.916	0.184873	0.119319	0.0245634	0.189386	Capn1
ENSMUSG00000072618	829.491	0.203131	0.146285	0.0246075	0.189386	Gm10384
ENSMUSG00000079470	193.406	0.221359	0.257262	0.0245772	0.189386	Utp14b
ENSMUSG00000020919	3983.34	0.198188	0.139593	0.0246592	0.189408	Stat5b
ENSMUSG00000021520	8973.96	-0.204361	0.132452	0.024649	0.189408	Uqcrb
ENSMUSG00000048154	382.405	0.210071	0.294576	0.0246661	0.189408	Kmt2d
ENSMUSG00000056629	2414.47	-0.141799	0.079216	0.0246679	0.189408	Fkbp2
ENSMUSG00000032002	10357.2	-0.160041	0.0925489	0.0246841	0.189422	Dcun1d5
ENSMUSG00000022749	347.929	-0.208964	0.27039	0.0248517	0.190322	Tbc1d23
ENSMUSG00000031167	13734.4	-0.147668	0.0837805	0.0248241	0.190322	Rbm3
ENSMUSG00000032637	3420.57	0.152652	0.0868116	0.0248592	0.190322	Atxn2l
ENSMUSG00000107838	66.9885	0.0738274	0.151325	0.0248403	0.190322	Gm45769
ENSMUSG00000003378	42.6304	0.0864455	0.163243	0.0249279	0.190528	Grik5
ENSMUSG00000025059	1319.61	-0.195608	0.13831	0.0249872	0.190528	Gk
ENSMUSG00000030868	4869.97	-0.138136	0.0746901	0.0249476	0.190528	Dctn5
ENSMUSG00000031355	46.2703	-0.0657613	0.14493	0.0249805	0.190528	Arhgap6
ENSMUSG00000047881	937.186	0.177326	0.112171	0.0249833	0.190528	Rell1
ENSMUSG00000071037	217.215	-0.21912	0.201895	0.0249773	0.190528	Camkmt
ENSMUSG00000097047	56.4272	0.150128	0.249856	0.0249511	0.190528	1110020A21Rik
ENSMUSG00000021211	47.3418	-0.118659	0.2018	0.0251084	0.190734	Akr1c12
ENSMUSG00000029155	19.8697	0.0508013	0.135272	0.02505	0.190734	Spata18
ENSMUSG00000035021	6785.19	0.136139	0.0738757	0.0251325	0.190734	Baz1a
ENSMUSG00000036698	901.669	0.212232	0.171563	0.0250882	0.190734	Ago2
ENSMUSG00000042507	270.797	0.176905	0.284881	0.0251255	0.190734	Elmsan1
ENSMUSG00000044807	257.731	0.126491	0.216007	0.0251446	0.190734	Zfp354c
ENSMUSG00000045103	89.8599	-0.160374	0.261791	0.0251029	0.190734	Dmd
ENSMUSG00000048458	34.7948	0.0669001	0.145988	0.0251187	0.190734	Fam212b
ENSMUSG00000059486	2397.31	0.1675	0.101063	0.0250423	0.190734	Kbtbd2
ENSMUSG00000050930	283.367	0.218458	0.197288	0.0251751	0.190856	Map10
ENSMUSG00000062937	4984.27	-0.14647	0.0818447	0.0251946	0.190894	Mtap
ENSMUSG00000044092	27.0069	0.0971593	0.174733	0.0252896	0.191503	C130050O18Rik
ENSMUSG00000020193	126.121	-0.174215	0.276156	0.0254043	0.192147	Zpbp
ENSMUSG00000021175	5817.5	-0.148435	0.0851914	0.0254276	0.192147	Cdca7l
ENSMUSG00000024095	518.534	0.217496	0.237608	0.0254053	0.192147	Hnrnpll
ENSMUSG00000095588	244.037	-0.186215	0.124961	0.025433	0.192147	Gm12350
ENSMUSG00000018362	55891.5	-0.163232	0.0992321	0.025464	0.192271	Kpna2
ENSMUSG00000086316	442.129	-0.201873	0.151686	0.0255387	0.192725	Nbdy
ENSMUSG00000025995	5071.47	-0.170721	0.105542	0.0255836	0.192954	Wdr75
ENSMUSG00000032067	3387.84	-0.155369	0.0915907	0.0256783	0.193446	Pts
ENSMUSG00000112057	57.9741	0.177026	0.276401	0.0256754	0.193446	Gm21321
ENSMUSG00000031864	4441.94	-0.146922	0.0819454	0.0257021	0.193515	Ints10
ENSMUSG00000036781	8030.19	-0.157342	0.0929085	0.0257529	0.193786	Rps27l
ENSMUSG00000032320	7009.31	-0.166144	0.102653	0.025831	0.193931	Rcn2
ENSMUSG00000032540	143.5	0.190316	0.287932	0.0258197	0.193931	Abhd5
ENSMUSG00000042569	1932.51	-0.158827	0.0948422	0.0258231	0.193931	Dhrs7b
ENSMUSG00000053253	2172.6	-0.164972	0.0998705	0.0258061	0.193931	Ndfip2
ENSMUSG00000021576	6473.77	-0.151394	0.0839988	0.0258698	0.194112	Pdcd6
ENSMUSG00000029097	595.411	0.200357	0.149018	0.0259403	0.194468	Trmt44
ENSMUSG00000101655	217.973	-0.212865	0.173748	0.0259467	0.194468	2310040G24Rik
ENSMUSG00000051184	102.36	0.218237	0.235801	0.0259643	0.194488	Zfp524
ENSMUSG00000003923	3965.12	-0.128521	0.0683973	0.0260159	0.194573	Tfam
ENSMUSG00000028412	684.947	0.219386	0.221832	0.0260198	0.194573	Slc44a1
ENSMUSG00000070462	1879.75	0.200876	0.150851	0.0260159	0.194573	Tlnrd1
ENSMUSG00000033306	762.676	0.210517	0.175535	0.0260718	0.19474	Lpp
ENSMUSG00000037594	128.611	0.213446	0.2576	0.0260696	0.19474	BC022687
ENSMUSG00000017132	8209.42	0.156037	0.0909091	0.0261938	0.195438	Cyth1
ENSMUSG00000038126	1122.53	0.207163	0.159467	0.0261949	0.195438	Mphosph9
ENSMUSG00000027714	3664.26	-0.15575	0.0990429	0.0262319	0.195604	Exosc9
ENSMUSG00000006850	937.758	0.173735	0.110455	0.0263304	0.195784	Tmco6
ENSMUSG00000027679	2598.47	-0.123172	0.0641007	0.026281	0.195784	Dnajc19
ENSMUSG00000027698	732.745	-0.198007	0.152818	0.0263143	0.195784	Nceh1
ENSMUSG00000049672	1776.53	0.152773	0.0884024	0.0263281	0.195784	Zbtb14
ENSMUSG00000108957	63.9732	0.0719618	0.149854	0.0263081	0.195784	Gm45235
ENSMUSG00000036820	1215.5	-0.181128	0.120862	0.0263642	0.195925	Amdhd2
ENSMUSG00000031266	562.226	-0.191223	0.133202	0.026399	0.196002	Gla
ENSMUSG00000056429	3388.68	0.18092	0.121055	0.0264119	0.196002	Tgoln1
ENSMUSG00000078202	53.2834	0.180163	0.278084	0.0264193	0.196002	Nrarp
ENSMUSG00000014668	2032.87	-0.144023	0.0810925	0.0264403	0.196048	Chfr
ENSMUSG00000038375	165.997	0.138448	0.228975	0.0265088	0.196409	Trp53inp2
ENSMUSG00000061979	1871.04	-0.1697	0.105814	0.0265188	0.196409	Rcc1l
ENSMUSG00000018765	2404.54	0.176932	0.115669	0.0265428	0.196476	Fxr2
ENSMUSG00000023206	265.741	0.200077	0.154085	0.0265856	0.196528	Il15ra
ENSMUSG00000025920	1133.97	-0.177034	0.115425	0.0266094	0.196528	Stau2
ENSMUSG00000047777	536.209	0.215424	0.233803	0.0266042	0.196528	Phf13
ENSMUSG00000108621	1025.48	0.206494	0.267964	0.0265898	0.196528	Gm37494
ENSMUSG00000097059	306.904	-0.205966	0.170754	0.026636	0.196614	Fam120aos
ENSMUSG00000045294	969.51	0.213687	0.201605	0.0266905	0.196795	Insig1
ENSMUSG00000061838	3671.79	-0.152424	0.0881664	0.0266888	0.196795	Suclg2
ENSMUSG00000027854	1902.1	-0.151399	0.0875805	0.0268022	0.197288	Sike1
ENSMUSG00000039047	1547.26	-0.158329	0.0951712	0.0267813	0.197288	Pigk
ENSMUSG00000075033	832.074	0.205929	0.158785	0.0267873	0.197288	Nxpe3
ENSMUSG00000097077	24.9053	-0.0550914	0.137651	0.0268324	0.1974	Gm16712
ENSMUSG00000022864	1619.71	-0.177063	0.115029	0.0268762	0.197612	D16Ertd472e
ENSMUSG00000000594	7662.9	-0.132548	0.0709972	0.0269401	0.197972	Gm2a
ENSMUSG00000022323	807.08	-0.211345	0.184238	0.0269595	0.198004	Rida
ENSMUSG00000031255	616.792	-0.205138	0.167862	0.02698	0.198044	Sytl4
ENSMUSG00000074862	25.5117	0.096655	0.17373	0.0270216	0.198239	BC025920
ENSMUSG00000032300	2779.16	0.171441	0.108096	0.027047	0.198314	1700017B05Rik
ENSMUSG00000084957	1694.9	-0.160645	0.0971585	0.0270746	0.198407	Bbip1
ENSMUSG00000031982	619.896	0.183363	0.124486	0.0270935	0.198434	Arv1
ENSMUSG00000026078	2960.41	-0.170726	0.110317	0.0271479	0.198723	Pdcl3
ENSMUSG00000002550	4145.7	0.144899	0.0804935	0.0272475	0.199125	Uck1
ENSMUSG00000031858	4145.5	0.152702	0.0897429	0.0272208	0.199125	Mau2
ENSMUSG00000039899	168.467	-0.167579	0.260954	0.0272482	0.199125	Fgl2
ENSMUSG00000021771	11903.3	-0.137816	0.0775162	0.0273834	0.199834	Vdac2
ENSMUSG00000024774	115.846	0.13326	0.221196	0.0273908	0.199834	Ankrd22
ENSMUSG00000097121	73.4017	-0.140729	0.230378	0.0273623	0.199834	D130020L05Rik
ENSMUSG00000021731	3069.2	-0.151628	0.0885745	0.0274217	0.199949	Mrps30
ENSMUSG00000022364	2915.27	0.145059	0.0814995	0.0274667	0.200166	Tbc1d31
ENSMUSG00000000402	126.612	0.170583	0.263972	0.0275625	0.200603	Egfl6
ENSMUSG00000036057	118.34	0.195317	0.270177	0.0275768	0.200603	Ptpn23
ENSMUSG00000037022	309.8	-0.21232	0.200156	0.0275875	0.200603	Mmaa
ENSMUSG00000041817	22.2017	0.0600604	0.140796	0.0275802	0.200603	Fam169a
ENSMUSG00000026069	19.624	0.0189579	0.122881	0.0276945	0.20127	Il1rl1
ENSMUSG00000027454	3025.81	-0.148578	0.0857788	0.0277457	0.201399	Gins1
ENSMUSG00000040734	61.4133	0.120875	0.201866	0.0277581	0.201399	Ppp1r13l
ENSMUSG00000072437	99.0337	0.0927753	0.169372	0.0277426	0.201399	Nanos1
ENSMUSG00000079685	1057.15	0.211424	0.223475	0.0277759	0.201417	Ulbp1
ENSMUSG00000002767	4116.62	-0.166582	0.103534	0.0280517	0.202086	Mrpl2
ENSMUSG00000005667	4595.85	0.144927	0.072749	0.0279728	0.202086	Mthfd2
ENSMUSG00000020864	2888.17	0.138493	0.0771037	0.0279848	0.202086	Ankrd40
ENSMUSG00000020962	1738.04	0.182806	0.128271	0.027931	0.202086	Gtf2a1
ENSMUSG00000027236	4194.65	-0.187928	0.129755	0.0280282	0.202086	Eif3j1
ENSMUSG00000030123	637.435	0.207559	0.24719	0.0280421	0.202086	Plxnd1
ENSMUSG00000030474	34.103	0.0727604	0.150378	0.0279983	0.202086	Siglece
ENSMUSG00000033319	2164.96	0.187367	0.133165	0.0280674	0.202086	Fem1c
ENSMUSG00000033411	5662.2	0.170435	0.112779	0.0279635	0.202086	Ctdspl2
ENSMUSG00000056185	328.24	0.188466	0.262718	0.0280389	0.202086	Snx32
ENSMUSG00000059743	65.9562	0.140697	0.230387	0.028037	0.202086	Fdps
ENSMUSG00000060938	10105.5	-0.1511	0.0898752	0.0279421	0.202086	Rpl26
ENSMUSG00000116957	135.725	-0.183404	0.269332	0.0280619	0.202086	AC140186.1
ENSMUSG00000059824	245.236	0.195291	0.148568	0.0280929	0.202096	Dbp
ENSMUSG00000073236	326.057	0.207962	0.219908	0.0280996	0.202096	2500004C02Rik
ENSMUSG00000042677	175.237	0.19359	0.267803	0.0281903	0.202638	Zc3h12a
ENSMUSG00000052584	29.4997	0.0617133	0.141967	0.0283188	0.203451	Serp2
ENSMUSG00000091735	18.3758	0.0497354	0.134542	0.02838	0.203779	Gpr62
ENSMUSG00000030708	245.155	0.209324	0.225203	0.0283967	0.203788	Dnajb13
ENSMUSG00000030610	1292.85	-0.179337	0.124474	0.0285117	0.204502	Det1
ENSMUSG00000028249	31096	-0.172171	0.106664	0.028573	0.20483	Sdcbp
ENSMUSG00000026036	1848.5	-0.205029	0.168747	0.0285903	0.204843	Nif3l1
ENSMUSG00000027305	2107.04	-0.193839	0.155521	0.0286545	0.20508	Ndufaf1
ENSMUSG00000029178	732.292	0.203797	0.173898	0.0286517	0.20508	Klf3
ENSMUSG00000009828	485.555	0.199465	0.158779	0.028778	0.205686	Ick
ENSMUSG00000037787	1096.93	-0.16845	0.10697	0.028772	0.205686	Apopt1
ENSMUSG00000050549	437.315	-0.203169	0.176445	0.0287861	0.205686	Fam241a
ENSMUSG00000026812	680.767	0.208885	0.206407	0.0288224	0.205723	Tsc1
ENSMUSG00000029552	2769.83	-0.146542	0.0850231	0.0288211	0.205723	Tes
ENSMUSG00000071451	1008.39	-0.177181	0.119733	0.0288719	0.205964	Psmg4
ENSMUSG00000060261	3171.73	0.133945	0.0739662	0.0289132	0.206148	Gtf2i
ENSMUSG00000000127	182.497	0.171687	0.262274	0.0289687	0.206431	Fer
ENSMUSG00000000804	279.647	0.206296	0.224556	0.0289983	0.20646	Usp32
ENSMUSG00000048174	60.4641	-0.0730531	0.15055	0.0290511	0.20646	Tmem81
ENSMUSG00000073535	30.6555	-0.071175	0.14884	0.0290116	0.20646	Gm5532
ENSMUSG00000076432	30595	-0.147396	0.0868569	0.0290408	0.20646	Ywhaq
ENSMUSG00000097354	505.874	0.186844	0.136059	0.0290396	0.20646	2310001H17Rik
ENSMUSG00000001999	2039.52	-0.166407	0.106732	0.0291924	0.206468	Blvra
ENSMUSG00000021124	2564.09	-0.169028	0.108215	0.0291733	0.206468	Vti1b
ENSMUSG00000022974	3006.41	0.146504	0.0864849	0.0291875	0.206468	Paxbp1
ENSMUSG00000024645	2853.65	-0.147148	0.0852489	0.0292161	0.206468	Timm21
ENSMUSG00000025330	438.9	0.200491	0.164305	0.0290998	0.206468	Padi4
ENSMUSG00000026797	597.642	0.205352	0.192937	0.029212	0.206468	Stxbp1
ENSMUSG00000027406	5686.7	-0.138359	0.0782762	0.0292127	0.206468	Idh3b
ENSMUSG00000028034	14039	-0.127531	0.0690333	0.0291913	0.206468	Fubp1
ENSMUSG00000043510	681.487	-0.167626	0.108698	0.0291024	0.206468	Hscb
ENSMUSG00000048905	156.227	0.151723	0.240968	0.0292246	0.206468	4930539E08Rik
ENSMUSG00000049577	3755.84	0.186595	0.13564	0.0292069	0.206468	Zfpm1
ENSMUSG00000028291	2826.6	-0.170988	0.111422	0.0293288	0.207093	Akirin2
ENSMUSG00000016319	63005.7	-0.156931	0.0961935	0.0294125	0.20713	Slc25a5
ENSMUSG00000031403	20856.9	-0.153874	0.0930898	0.0293785	0.20713	Dkc1
ENSMUSG00000032244	1688.95	0.203208	0.198218	0.029405	0.20713	Fem1b
ENSMUSG00000035877	509.75	0.201231	0.244099	0.0293882	0.20713	Zhx3
ENSMUSG00000054723	357.225	-0.202761	0.182316	0.0293572	0.20713	Vmac
ENSMUSG00000034320	391.421	0.206176	0.214037	0.0294499	0.207282	Slc26a2
ENSMUSG00000097760	73.1744	-0.121822	0.20463	0.0295513	0.207885	6030442K20Rik
ENSMUSG00000034255	1651.83	0.177641	0.123344	0.0296001	0.208006	Arhgap27
ENSMUSG00000054405	12330.1	-0.155451	0.093118	0.0295864	0.208006	Dnajc8
ENSMUSG00000025369	5320.26	0.186253	0.135667	0.0297834	0.208711	Smarcc2
ENSMUSG00000029276	955.053	-0.177419	0.119915	0.0297672	0.208711	Glmn
ENSMUSG00000032119	873.263	0.189045	0.138979	0.0297363	0.208711	Hinfp
ENSMUSG00000041571	3297.9	0.171584	0.114006	0.0297955	0.208711	Selenow
ENSMUSG00000058587	6243.15	-0.183921	0.131613	0.0297791	0.208711	Tmod3
ENSMUSG00000095403	68.0459	0.111368	0.190078	0.0297452	0.208711	Gm21092
ENSMUSG00000031349	1327.98	-0.162883	0.10368	0.0298234	0.208795	Nsdhl
ENSMUSG00000027618	2071.54	-0.144802	0.0853195	0.0299038	0.209136	Nfs1
ENSMUSG00000029547	3821.11	0.20206	0.177378	0.0298896	0.209136	Ints1
ENSMUSG00000019814	4793.87	-0.160725	0.1009	0.0299482	0.209336	Ltv1
ENSMUSG00000027835	5385.49	-0.185269	0.135881	0.0299949	0.20944	Pdcd10
ENSMUSG00000032086	464.307	0.204882	0.219184	0.0299842	0.20944	Bace1
ENSMUSG00000014554	1893.88	-0.131742	0.0673772	0.0301283	0.209684	Dguok
ENSMUSG00000015542	491.51	-0.183754	0.133613	0.0301125	0.209684	Nat9
ENSMUSG00000021180	1479.64	0.204453	0.192533	0.0300713	0.209684	Rps6ka5
ENSMUSG00000024259	3735.84	-0.198802	0.178921	0.0301413	0.209684	Slc25a46
ENSMUSG00000026883	431.458	0.181315	0.260049	0.0301324	0.209684	Dab2ip
ENSMUSG00000032412	56091.8	-0.133447	0.0749697	0.0301018	0.209684	Atp1b3
ENSMUSG00000061607	522.65	0.19677	0.248945	0.0300599	0.209684	Mdc1
ENSMUSG00000029177	14012.1	-0.127746	0.0730921	0.0302081	0.209901	Cenpa
ENSMUSG00000070997	27.6587	0.0600939	0.140694	0.0301998	0.209901	1700055D18Rik
ENSMUSG00000106157	261.829	-0.19457	0.243941	0.0302203	0.209901	4930555A03Rik
ENSMUSG00000005873	4337.11	0.134059	0.074439	0.030257	0.209986	Reep5
ENSMUSG00000095865	108.172	-0.0565067	0.138489	0.0302644	0.209986	Gm13237
ENSMUSG00000013646	1303.04	0.17773	0.123637	0.0303609	0.210545	Sh3bp5l
ENSMUSG00000000317	82.9856	0.11603	0.195438	0.0305253	0.210695	Bcl6b
ENSMUSG00000009585	18062.2	-0.115306	0.0614005	0.030471	0.210695	Apobec3
ENSMUSG00000017009	5553.73	0.181108	0.12903	0.0304204	0.210695	Sdc4
ENSMUSG00000029387	3876.15	-0.155588	0.0954273	0.0305028	0.210695	Gtf2h3
ENSMUSG00000034211	4964.69	-0.125089	0.0682203	0.0304072	0.210695	Mrps17
ENSMUSG00000038227	691.232	-0.176879	0.12482	0.0304939	0.210695	Hoxa9
ENSMUSG00000038368	1056.15	-0.186835	0.144345	0.0305265	0.210695	Focad
ENSMUSG00000040231	42.9425	0.111552	0.189963	0.0304491	0.210695	Syngr4
ENSMUSG00000057363	1473.21	-0.145735	0.0858753	0.0304503	0.210695	Uxs1
ENSMUSG00000022365	5816.74	0.102862	0.0536569	0.0306132	0.210864	Derl1
ENSMUSG00000024528	2324.75	-0.14674	0.0931695	0.0306011	0.210864	Srfbp1
ENSMUSG00000031312	39.5683	0.0548276	0.137452	0.0306149	0.210864	Itgb1bp2
ENSMUSG00000063684	1837.72	-0.158669	0.0999873	0.0305983	0.210864	Gm13910
ENSMUSG00000022863	798.907	-0.176114	0.122841	0.0306794	0.211197	Btg3
ENSMUSG00000066150	2921.94	-0.157564	0.0973655	0.030705	0.211264	Slc31a1
ENSMUSG00000024402	227.918	0.186679	0.256496	0.0307591	0.211525	Lta
ENSMUSG00000003452	118.156	0.146769	0.23209	0.0308052	0.211731	Bicd1
ENSMUSG00000006021	1012.16	-0.169045	0.11226	0.0308555	0.211882	Kptn
ENSMUSG00000025034	2276.81	0.173281	0.119084	0.0308592	0.211882	Trim8
ENSMUSG00000023960	161.402	0.176939	0.251881	0.030976	0.212379	Enpp5
ENSMUSG00000038982	915.387	-0.157439	0.0989491	0.0309797	0.212379	Bloc1s5
ENSMUSG00000039824	47.2475	0.13025	0.212163	0.0309801	0.212379	Myl6b
ENSMUSG00000038742	167.933	0.202073	0.20641	0.0310196	0.212427	Angptl6
ENSMUSG00000042105	929.581	0.199872	0.182238	0.0310515	0.212427	Inpp5f
ENSMUSG00000051278	1238.92	0.195966	0.165322	0.0310392	0.212427	Zgrf1
ENSMUSG00000078126	1552.73	-0.143148	0.0837601	0.0310222	0.212427	Rpl23a-ps3
ENSMUSG00000036046	3649.91	0.130863	0.0734929	0.0310776	0.212495	5031439G07Rik
ENSMUSG00000020069	2476.4	0.131136	0.082533	0.031121	0.212522	Hnrnph3
ENSMUSG00000052146	6376.51	-0.167027	0.109466	0.0311298	0.212522	Rps10
ENSMUSG00000101932	64.6525	-0.172508	0.251526	0.0311051	0.212522	Gm10074
ENSMUSG00000066538	82.3908	-0.0794527	0.155696	0.0311505	0.212552	Gm6254
ENSMUSG00000040747	16092.4	-0.152311	0.0931854	0.0312376	0.213028	Cd53
ENSMUSG00000078762	377.636	-0.187833	0.146584	0.0312526	0.213028	Haus5
ENSMUSG00000050945	331.689	0.199584	0.184467	0.0313031	0.213263	Zfp438
ENSMUSG00000025967	8432.97	-0.137133	0.0792657	0.0313492	0.213466	Eef1b2
ENSMUSG00000015776	1855.81	0.162448	0.103815	0.0314659	0.213709	Med22
ENSMUSG00000020444	2497.22	-0.158167	0.0998396	0.0314387	0.213709	Guk1
ENSMUSG00000052889	11133.3	0.175808	0.112641	0.0314642	0.213709	Prkcb
ENSMUSG00000071103	42.0022	-0.0614863	0.141531	0.0314183	0.213709	1700029J07Rik
ENSMUSG00000087403	486.622	-0.143575	0.228588	0.0314124	0.213709	Kantr
ENSMUSG00000022338	2696.53	-0.180778	0.126337	0.0316401	0.21467	Eny2
ENSMUSG00000034343	3048.36	-0.126409	0.0709779	0.0316329	0.21467	Ube2f
ENSMUSG00000007950	2226.91	0.193452	0.161294	0.0316905	0.214902	Abhd8
ENSMUSG00000039463	1282.75	0.171772	0.117545	0.0317201	0.214992	Slc9a8
ENSMUSG00000074102	2603.36	0.167822	0.112845	0.0317728	0.215238	Rbm15b
ENSMUSG00000050957	625.738	-0.188516	0.149945	0.0318485	0.21564	Insl6
ENSMUSG00000045193	1797.49	-0.187536	0.147208	0.0318982	0.215866	Cirbp
ENSMUSG00000042705	1138.9	-0.160554	0.105776	0.0319204	0.215905	Commd10
ENSMUSG00000018661	1596.01	0.163955	0.107521	0.0320094	0.21633	Cog1
ENSMUSG00000025591	1053.45	-0.182783	0.137428	0.0320237	0.21633	Tma16
ENSMUSG00000039254	2039.63	-0.137646	0.0791094	0.0320653	0.21633	Pomt1
ENSMUSG00000048007	2525.29	-0.170996	0.118587	0.0320516	0.21633	Timm8a1
ENSMUSG00000067722	2486.62	-0.152741	0.0953309	0.0320437	0.21633	BC003965
ENSMUSG00000023106	5877.08	-0.154642	0.0955247	0.0321501	0.21657	Denr
ENSMUSG00000037754	2966.34	0.186258	0.144072	0.0321296	0.21657	Ppp1r16b
ENSMUSG00000046546	1785.31	0.178935	0.129808	0.0321428	0.21657	Fam43a
ENSMUSG00000029233	846.661	-0.16694	0.112388	0.0322195	0.216877	Srd5a3
ENSMUSG00000093904	8222.74	-0.161207	0.105779	0.0322287	0.216877	Tomm20
ENSMUSG00000037318	7107.98	0.14049	0.085492	0.0322518	0.216922	Traf3ip3
ENSMUSG00000090394	2580.04	0.172617	0.119839	0.0323268	0.217315	4930523C07Rik
ENSMUSG00000027900	770.204	-0.182324	0.141373	0.0324225	0.217847	Dram2
ENSMUSG00000003062	1764.46	-0.147704	0.0916699	0.0324525	0.217909	Stard3nl
ENSMUSG00000004113	178.638	0.132839	0.214856	0.0324648	0.217909	Cacna1b
ENSMUSG00000073155	1439.07	-0.158594	0.102192	0.0325203	0.218171	1810058I24Rik
ENSMUSG00000072969	391.041	-0.195024	0.180915	0.0325449	0.218225	Armcx5
ENSMUSG00000034278	478.091	-0.18145	0.136433	0.032574	0.218309	Dnajc17
ENSMUSG00000005148	31.4739	0.0735309	0.150313	0.03263	0.21853	Klf5
ENSMUSG00000031904	2677	0.113184	0.0605804	0.0326402	0.21853	Slc7a6
ENSMUSG00000049858	531.13	0.195666	0.18079	0.0327143	0.218693	Suox
ENSMUSG00000050605	792.108	0.157368	0.100157	0.0326877	0.218693	Zfp61
ENSMUSG00000059895	19007.9	0.135931	0.0791523	0.0326989	0.218693	Ptp4a3
ENSMUSG00000015994	5517.46	-0.137375	0.0836267	0.032737	0.218734	Fnta
ENSMUSG00000024008	291.6	0.192133	0.231045	0.0328482	0.219335	Cpne5
ENSMUSG00000032690	79.8158	0.0620171	0.141973	0.0328659	0.219335	Oas2
ENSMUSG00000059447	7838.91	-0.147718	0.090072	0.032877	0.219335	Hadhb
ENSMUSG00000049191	88.9445	0.120241	0.199109	0.0329336	0.219602	Rtl5
ENSMUSG00000021996	5117.71	-0.126568	0.0697809	0.0329898	0.219754	Esd
ENSMUSG00000041642	388.146	0.172804	0.247612	0.0329878	0.219754	Kif21b
ENSMUSG00000070493	20089.3	-0.119246	0.0667932	0.0330082	0.219766	Chchd2
ENSMUSG00000042404	875.43	0.19495	0.193418	0.0330415	0.219876	Dennd4b
ENSMUSG00000029066	4872.7	-0.132497	0.076051	0.0331043	0.220183	Mrpl20
ENSMUSG00000020758	170.143	0.0966227	0.17147	0.0332768	0.220884	Itgb4
ENSMUSG00000026070	18.3705	-0.0338206	0.127296	0.0332629	0.220884	Il18r1
ENSMUSG00000029156	1527.37	-0.133648	0.0775168	0.0332676	0.220884	Sgcb
ENSMUSG00000041064	2354.03	0.151948	0.0950229	0.0332388	0.220884	Pif1
ENSMUSG00000029442	38.8417	0.0856569	0.161063	0.033353	0.221279	Wdr66
ENSMUSG00000027742	3071.97	-0.14201	0.0851947	0.0333759	0.221319	Cog6
ENSMUSG00000023495	235.278	0.179584	0.228499	0.0334332	0.221365	Pcbp4
ENSMUSG00000036686	1035.89	0.162999	0.108438	0.0334221	0.221365	Cc2d1a
ENSMUSG00000090942	23.2746	0.0171575	0.122504	0.0334267	0.221365	F830016B08Rik
ENSMUSG00000020840	11734.9	0.114718	0.0630772	0.0334543	0.221393	Blmh
ENSMUSG00000046605	275.278	-0.186207	0.232019	0.0334967	0.221562	B3gntl1
ENSMUSG00000021794	7346.14	-0.121005	0.0639504	0.0335874	0.222051	Glud1
ENSMUSG00000066442	70.1064	-0.147933	0.227065	0.0336932	0.222638	Mthfs
ENSMUSG00000076749	363.76	-0.0676559	0.145726	0.0337408	0.222842	Tcrg-C1
ENSMUSG00000074497	372.656	0.192415	0.174171	0.0337653	0.222892	A430078G23Rik
ENSMUSG00000040249	53.1681	0.0681317	0.146203	0.0338161	0.223115	Lrp1
ENSMUSG00000020986	1932.1	-0.159571	0.105603	0.0338539	0.223136	Sec23a
ENSMUSG00000033392	926.337	0.193951	0.180755	0.03387	0.223136	Clasp2
[truncated: 51,556 more rows]

## Sheet: Fig4a P1P2dKOvsCtrl_allresults
EnsemblGeneID	baseMean	log2FoldChange	lfcSE	pvalue	padj	GeneName
ENSMUSG00000054808	17808.7	-1.56526	0.0441713	1.50898e-276	2.52829e-272	Actn4
ENSMUSG00000006498	8108.6	-2.22478	0.065738	2.51892e-252	2.11023e-248	Ptbp1
ENSMUSG00000041187	4971.39	-2.37642	0.0754368	2.68026e-218	1.49692e-214	Prkd2
ENSMUSG00000039774	1397.5	-3.14961	0.128508	4.43094e-134	1.85601e-130	Galnt12
ENSMUSG00000029171	1189.59	-3.23134	0.141979	2.81948e-116	9.44808e-113	Pgm1
ENSMUSG00000035000	9149.18	-2.62203	0.117063	2.76148e-112	7.71144e-109	Dpp4
ENSMUSG00000028134	6963.23	2.77283	0.127063	5.70592e-107	1.36575e-103	Ptbp2
ENSMUSG00000003379	38082.3	-1.5035	0.0768602	1.75467e-86	3.67493e-83	Cd79a
ENSMUSG00000028923	2595.52	-1.92708	0.0989418	9.80969e-86	1.82624e-82	Necap2
ENSMUSG00000030536	6741.98	-3.14212	0.163312	6.5115e-84	1.091e-80	Iqgap1
ENSMUSG00000027699	9900.43	-2.32087	0.121588	1.20103e-82	1.82939e-79	Ect2
ENSMUSG00000002227	1341.24	-2.03381	0.111583	2.07617e-75	2.89885e-72	Mov10
ENSMUSG00000025188	988.075	-2.12847	0.120721	8.78071e-71	1.1317e-67	Hps1
ENSMUSG00000032058	4272.66	-1.46731	0.0862471	4.58356e-66	5.48554e-63	Ppp2r1b
ENSMUSG00000067567	1106.6	-1.88039	0.111457	4.31301e-65	4.81763e-62	Hdac8
ENSMUSG00000020272	3814.26	-1.98818	0.119502	1.9516e-63	2.04369e-60	Stk10
ENSMUSG00000039345	1036.18	1.91107	0.115883	2.57025e-62	2.53321e-59	Mettl22
ENSMUSG00000026222	2922.29	-1.75899	0.107721	7.80704e-61	7.26705e-58	Sp100
ENSMUSG00000061665	697.05	-2.32467	0.145762	1.66244e-58	1.46601e-55	Cd2ap
ENSMUSG00000054641	3371.21	-2.95657	0.189561	2.47492e-56	2.07337e-53	Mmrn1
ENSMUSG00000021408	1411.37	-2.62979	0.171591	2.36748e-54	1.88891e-51	Ripk1
ENSMUSG00000027940	30410.2	-0.852617	0.0561192	3.90416e-53	2.97338e-50	Tpm3
ENSMUSG00000069805	263.678	-3.20948	0.212714	9.69249e-53	7.06077e-50	Fbp1
ENSMUSG00000025747	12754.4	-1.14898	0.0766316	7.35973e-52	5.13801e-49	Tyms
ENSMUSG00000030533	1424.08	-1.5746	0.109174	2.3407e-48	1.56874e-45	Unc45a
ENSMUSG00000052572	1760.86	-1.89085	0.131426	3.51569e-48	2.26559e-45	Dlg2
ENSMUSG00000059851	2058.74	-0.852706	0.0606712	3.00045e-46	1.86195e-43	Kmt5c
ENSMUSG00000075602	3149.69	2.10089	0.151891	2.11901e-45	1.268e-42	Ly6a
ENSMUSG00000032053	16889.2	-1.09841	0.0800916	8.37717e-44	4.83998e-41	Pou2af1
ENSMUSG00000032556	8293.62	1.17017	0.0868155	1.59566e-42	8.91175e-40	Bfsp2
ENSMUSG00000058126	1757.88	-1.19019	0.0906564	1.63461e-40	8.83481e-38	Tpm3-rs7
ENSMUSG00000028678	6639.4	-1.07949	0.0845897	2.02261e-38	1.05903e-35	Kif2c
ENSMUSG00000108722	201.603	-3.17125	0.251154	5.18349e-38	2.6318e-35	Gm34225
ENSMUSG00000041115	321.718	2.16766	0.172323	1.08847e-37	5.36393e-35	Iqsec2
ENSMUSG00000032936	839.156	1.73342	0.140447	3.27608e-36	1.56831e-33	Camkv
ENSMUSG00000030934	10026.5	-1.02064	0.0828791	6.76436e-36	3.14825e-33	Oat
ENSMUSG00000025538	524.378	-1.71472	0.143632	4.60512e-34	2.08537e-31	Sumf2
ENSMUSG00000066705	1378.79	-2.11806	0.179311	1.66559e-33	7.34395e-31	Fxyd6
ENSMUSG00000061859	665.236	-1.91885	0.163152	3.29564e-33	1.41586e-30	Patj
ENSMUSG00000030677	17265.4	-1.00384	0.0873019	1.08867e-31	4.56016e-29	Kif22
ENSMUSG00000030156	2037.16	1.14564	0.0997051	1.15714e-31	4.72873e-29	Cd69
ENSMUSG00000021288	3708.09	0.865601	0.0758642	4.70726e-31	1.87786e-28	Klc1
ENSMUSG00000104413	903.936	-1.41619	0.125043	6.8063e-31	2.65208e-28	Gm37065
ENSMUSG00000017897	295.369	-2.99539	0.265237	7.32796e-31	2.79045e-28	Eya2
ENSMUSG00000036594	1351.29	2.73403	0.245624	2.79348e-30	1.04011e-27	H2-Aa
ENSMUSG00000020027	4694.33	1.40496	0.127412	1.22149e-29	4.44914e-27	Socs2
ENSMUSG00000030742	669.352	-1.54028	0.14011	2.3004e-29	8.20068e-27	Lat
ENSMUSG00000100455	801.928	1.65614	0.151089	3.31147e-29	1.15591e-26	Gm29170
ENSMUSG00000034401	3322.06	-1.20707	0.111264	6.46756e-29	2.21151e-26	Spata6
ENSMUSG00000022475	4066.12	-1.45355	0.134205	1.01956e-28	3.41654e-26	Hdac7
ENSMUSG00000039298	1471.74	-1.38728	0.128443	2.49863e-28	8.20873e-26	Cdk5rap2
ENSMUSG00000075269	635.512	2.06534	0.195873	3.02606e-27	9.75031e-25	Bex6
ENSMUSG00000062939	1131.04	-1.06346	0.1007	3.66238e-27	1.1578e-24	Stat4
ENSMUSG00000001029	1756.85	-0.96269	0.092143	1.25771e-26	3.90241e-24	Icam2
ENSMUSG00000020585	4068.97	-0.58965	0.0566393	3.65359e-26	1.11302e-23	Laptm4a
ENSMUSG00000031328	3451.98	-3.13451	0.309423	1.49252e-25	4.46556e-23	Flna
ENSMUSG00000097779	660.738	-1.16205	0.115383	5.55169e-25	1.63191e-22	4833407H14Rik
ENSMUSG00000028894	3099.74	-0.792346	0.0789521	8.8974e-25	2.57027e-22	Inpp5b
ENSMUSG00000027330	7150.62	-1.50829	0.152483	2.34554e-24	6.66093e-22	Cdc25b
ENSMUSG00000043773	2153.82	-1.30165	0.132009	4.21097e-24	1.17591e-21	1700048O20Rik
ENSMUSG00000006800	717.629	1.99234	0.205642	2.01791e-23	5.54263e-21	Sulf2
ENSMUSG00000000184	8472.02	0.968332	0.0999139	3.10871e-23	8.40103e-21	Ccnd2
ENSMUSG00000026815	772.647	1.63238	0.17019	4.00982e-23	1.06642e-20	Gfi1b
ENSMUSG00000052369	1828.48	-0.987968	0.103256	9.68684e-23	2.53598e-20	Tmem106c
ENSMUSG00000062510	3192.23	-0.649815	0.0677017	1.11782e-22	2.88141e-20	Nsl1
ENSMUSG00000019832	549.548	-1.99109	0.210926	1.38072e-22	3.50514e-20	Rab32
ENSMUSG00000022177	5985.79	-0.779236	0.0816403	1.6206e-22	4.0527e-20	Haus4
ENSMUSG00000021680	627.861	1.57854	0.16702	1.72573e-22	4.25214e-20	Crhbp
ENSMUSG00000032350	5376.46	-0.905096	0.0952502	1.97649e-22	4.79943e-20	Gclc
ENSMUSG00000020227	1342.35	-0.90522	0.0955947	2.60254e-22	6.22937e-20	Irak3
ENSMUSG00000027007	315.449	-1.64383	0.174677	2.94257e-22	6.94405e-20	Ssfa2
ENSMUSG00000062031	1200.99	-1.07975	0.115168	5.14763e-22	1.1979e-19	Pgghg
ENSMUSG00000028494	2030.17	-0.915681	0.0975593	5.23935e-22	1.20254e-19	Plin2
ENSMUSG00000024065	343.319	2.72344	0.295294	6.98473e-22	1.58147e-19	Ehd3
ENSMUSG00000028419	1725.03	-1.26663	0.136885	1.2467e-21	2.78512e-19	Chmp5
ENSMUSG00000112082	456.305	-1.34563	0.145837	1.75789e-21	3.87545e-19	Gm35035
ENSMUSG00000029298	741.018	-1.90462	0.207108	2.04296e-21	4.44543e-19	Gbp9
ENSMUSG00000023966	3217.1	0.783434	0.0846282	2.39367e-21	5.14178e-19	Rsph9
ENSMUSG00000070504	386.867	-2.8305	0.311256	2.83328e-21	6.00907e-19	Fcrl6
ENSMUSG00000034634	11137.3	1.05282	0.114444	3.02806e-21	6.34189e-19	Ly6d
ENSMUSG00000004105	1145.78	1.45352	0.159828	5.69971e-21	1.179e-18	Angptl2
ENSMUSG00000041135	473.443	-1.57806	0.173804	6.3181e-21	1.29097e-18	Ripk2
ENSMUSG00000039167	832.296	-1.27599	0.140478	6.48821e-21	1.30976e-18	Adgrl4
ENSMUSG00000049551	520.719	1.54583	0.170595	7.97628e-21	1.59098e-18	Fzd9
ENSMUSG00000071454	1108.73	-0.967708	0.10657	8.38781e-21	1.65339e-18	Dtnb
ENSMUSG00000027550	1936.18	-1.4831	0.163915	8.54983e-21	1.66573e-18	Lrrcc1
ENSMUSG00000024426	527.941	1.36298	0.151019	1.14755e-20	2.21002e-18	Atat1
ENSMUSG00000039891	106.83	3.25162	0.365787	1.25834e-20	2.39585e-18	Txlnb
ENSMUSG00000029602	754.022	1.57936	0.176181	1.87955e-20	3.53841e-18	Rasal1
ENSMUSG00000076441	2776.44	0.827449	0.0918065	1.99074e-20	3.70609e-18	Ass1
ENSMUSG00000029863	6514.46	-0.964598	0.108117	2.83996e-20	5.22896e-18	Casp2
ENSMUSG00000090841	8976.87	-0.625291	0.0695861	3.81586e-20	6.94943e-18	Myl6
ENSMUSG00000024610	3036.82	2.59493	0.296565	1.19429e-19	2.15165e-17	Cd74
ENSMUSG00000028525	4696.76	-0.934705	0.106958	2.04812e-19	3.65066e-17	Pde4b
ENSMUSG00000021596	947.223	-1.2718	0.147356	3.34357e-19	5.897e-17	Mctp1
ENSMUSG00000026123	2655.29	-0.581297	0.0665537	3.91023e-19	6.82458e-17	Plekhb2
ENSMUSG00000020888	1592.07	-1.05049	0.121945	4.61796e-19	7.97669e-17	Dvl2
ENSMUSG00000037972	3770.59	-1.07577	0.124225	5.66832e-19	9.6911e-17	Snn
ENSMUSG00000029923	253.448	-1.35309	0.157865	6.27153e-19	1.06141e-16	Rab19
ENSMUSG00000089889	151.73	1.68941	0.197754	7.57493e-19	1.26918e-16	0610040B10Rik
ENSMUSG00000076613	33778.8	1.17481	0.137741	1.06271e-18	1.76295e-16	Ighg2b
ENSMUSG00000019970	3553.33	-1.39238	0.164141	1.41968e-18	2.33203e-16	Sgk1
ENSMUSG00000056220	781.651	-1.27859	0.150976	1.68588e-18	2.74241e-16	Pla2g4a
ENSMUSG00000020437	3687.25	-1.01173	0.119164	1.7235e-18	2.75021e-16	Myo1g
ENSMUSG00000044167	5680.77	-0.679783	0.0795488	1.7218e-18	2.75021e-16	Foxo1
ENSMUSG00000068758	117.875	-2.65989	0.318293	1.81493e-18	2.86878e-16	Il3ra
ENSMUSG00000064373	4455.91	-1.17088	0.139611	3.23352e-18	5.06333e-16	Selenop
ENSMUSG00000033287	421.254	1.0952	0.131139	5.32981e-18	8.2686e-16	Kctd17
ENSMUSG00000001525	67884.2	0.660523	0.0784576	5.41839e-18	8.32891e-16	Tubb5
ENSMUSG00000029096	1131	1.77713	0.217559	6.90846e-18	1.05228e-15	Htra3
ENSMUSG00000074794	1116	-1.40058	0.169915	9.8737e-18	1.4904e-15	Arrdc3
ENSMUSG00000022014	1170.01	-0.774532	0.0932819	1.09949e-17	1.64482e-15	Epsti1
ENSMUSG00000075010	2118.19	-0.778116	0.0941264	1.46368e-17	2.17026e-15	AW112010
ENSMUSG00000066892	1195.55	-1.42475	0.173872	1.5579e-17	2.28971e-15	Fbxl12
ENSMUSG00000028378	5862.11	-0.977337	0.11922	2.25571e-17	3.28647e-15	Ptgr1
ENSMUSG00000026811	591.887	0.982092	0.120093	2.47982e-17	3.58184e-15	St6galnac6
ENSMUSG00000036111	127.102	1.64374	0.202132	2.59954e-17	3.72268e-15	Lmo1
ENSMUSG00000006276	2478.68	-0.82035	0.100336	3.6371e-17	5.16437e-15	Eps15l1
ENSMUSG00000005447	2326.49	-0.847238	0.104099	3.80565e-17	5.35829e-15	Pafah1b3
ENSMUSG00000023008	1215.52	-1.35533	0.167892	4.21893e-17	5.89068e-15	Fmnl3
ENSMUSG00000014668	2032.87	-0.680809	0.0838658	6.29506e-17	8.71684e-15	Chfr
ENSMUSG00000041238	4059.72	-0.50935	0.0625303	6.9512e-17	9.54651e-15	Rbbp8
ENSMUSG00000004552	786.455	-1.25343	0.156858	7.75428e-17	1.05628e-14	Ctse
ENSMUSG00000028464	147.87	1.79721	0.225073	7.88376e-17	1.05674e-14	Tpm2
ENSMUSG00000043411	2870.8	-0.79916	0.0991208	7.84084e-17	1.05674e-14	Usp48
ENSMUSG00000070730	1296.78	-0.683852	0.0847032	8.05195e-17	1.07072e-14	Rmdn3
ENSMUSG00000021123	1133.48	-1.01473	0.126823	9.14189e-17	1.20608e-14	Rdh12
ENSMUSG00000029314	3630.65	-0.975676	0.12148	9.96129e-17	1.30392e-14	Gpat3
ENSMUSG00000000881	319.691	-2.73998	0.346818	1.12505e-16	1.46125e-14	Dlg3
ENSMUSG00000040118	126.966	-3.03246	0.383826	1.16687e-16	1.50391e-14	Cacna2d1
ENSMUSG00000083161	915.075	1.22995	0.154702	1.27315e-16	1.62836e-14	Gm11427
ENSMUSG00000027215	1051.31	-0.957663	0.120243	1.52784e-16	1.93931e-14	Cd82
ENSMUSG00000020788	11141.7	-1.28024	0.16213	1.55194e-16	1.95509e-14	Atp2a3
ENSMUSG00000025357	2819.25	-1.13548	0.143329	1.59334e-16	1.99227e-14	Dgka
ENSMUSG00000060586	474.015	2.21052	0.281582	1.88288e-16	2.33686e-14	H2-Eb1
ENSMUSG00000024222	8339.59	0.472974	0.0586736	1.92624e-16	2.3731e-14	Fkbp5
ENSMUSG00000042215	1630.62	0.754296	0.0947829	2.40202e-16	2.93765e-14	Bag2
ENSMUSG00000049643	2182.06	0.89133	0.112671	2.42332e-16	2.94223e-14	2310022A10Rik
ENSMUSG00000021200	228.183	-1.6207	0.207264	3.24305e-16	3.90915e-14	Asb2
ENSMUSG00000020528	2636.11	0.671003	0.0855168	5.58398e-16	6.68283e-14	Prpsap2
ENSMUSG00000055116	15449.4	-1.10347	0.143985	7.16816e-16	8.51791e-14	Arntl
ENSMUSG00000058099	638.398	-1.1917	0.154142	7.22275e-16	8.52233e-14	Nfam1
ENSMUSG00000016481	4832.57	-0.576958	0.0739796	1.31936e-15	1.54586e-13	Cr1l
ENSMUSG00000032122	1650.14	0.751587	0.0974178	1.37054e-15	1.59468e-13	Slc37a2
ENSMUSG00000043987	2451.32	-0.815654	0.106126	1.51913e-15	1.75539e-13	Cep164
ENSMUSG00000004626	3150.54	-0.6431	0.0832304	1.56832e-15	1.79981e-13	Stxbp2
ENSMUSG00000079339	368.165	-1.7459	0.230695	1.75252e-15	1.99752e-13	Ifit1bl1
ENSMUSG00000048118	2327.83	-0.601507	0.0780704	1.99026e-15	2.25316e-13	Arid4a
ENSMUSG00000026740	763.312	-0.856663	0.112165	2.05486e-15	2.31069e-13	Dnajc1
ENSMUSG00000038418	436.69	-1.4951	0.197523	2.16251e-15	2.41552e-13	Egr1
ENSMUSG00000042675	3816.77	-1.20973	0.160096	2.41766e-15	2.67606e-13	Ypel3
ENSMUSG00000103168	1379.03	-1.31598	0.173918	2.4277e-15	2.67606e-13	Gm30948
ENSMUSG00000025491	368.89	1.97291	0.261734	2.66002e-15	2.91299e-13	Ifitm1
ENSMUSG00000041231	837.793	-1.25072	0.166136	3.23582e-15	3.52053e-13	Ublcp1
ENSMUSG00000022179	278.076	-1.24603	0.165799	3.70538e-15	4.0054e-13	4931414P19Rik
ENSMUSG00000027075	2600.77	-0.575276	0.0752087	4.08007e-15	4.38215e-13	Slc43a1
ENSMUSG00000039715	1671.72	0.890694	0.118216	4.58474e-15	4.89283e-13	Wdr34
ENSMUSG00000004665	2472.21	-0.850823	0.112885	4.64667e-15	4.92753e-13	Cnn2
ENSMUSG00000035637	1701.72	0.993939	0.132401	4.73643e-15	4.99112e-13	Grhpr
ENSMUSG00000031506	9674.75	-0.600945	0.0788719	4.83349e-15	5.06157e-13	Ptpn7
ENSMUSG00000112063	422.807	-1.28067	0.171646	5.56446e-15	5.79084e-13	Gm32220
ENSMUSG00000028517	472.456	-1.12351	0.150825	6.88428e-15	7.12013e-13	Plpp3
ENSMUSG00000030060	2698.95	-0.699738	0.0932185	7.22871e-15	7.43049e-13	Hmces
ENSMUSG00000026664	2079.48	-0.74646	0.100352	9.9463e-15	1.01616e-12	Phyh
ENSMUSG00000037860	695.611	-1.15382	0.156924	1.01376e-14	1.02943e-12	Aim2
ENSMUSG00000003992	3610.61	-0.574066	0.0765257	1.07152e-14	1.08153e-12	Ssbp2
ENSMUSG00000027306	20379.8	-0.649809	0.0870035	1.08677e-14	1.09035e-12	Nusap1
ENSMUSG00000011148	4631.63	0.727666	0.0974373	1.10631e-14	1.10335e-12	Adssl1
ENSMUSG00000024538	578.008	1.06317	0.144342	1.33831e-14	1.32683e-12	Ppic
ENSMUSG00000045679	3823.49	-1.14975	0.156019	1.39566e-14	1.37554e-12	Pqlc3
ENSMUSG00000000903	24534.2	-0.790175	0.106808	1.45137e-14	1.41431e-12	Vpreb3
ENSMUSG00000044694	352.625	1.00091	0.136005	1.45187e-14	1.41431e-12	2010007H06Rik
ENSMUSG00000021567	1008.23	-1.26471	0.172786	1.46624e-14	1.42005e-12	Nkd2
ENSMUSG00000032744	651.744	-3.27141	0.454941	1.71881e-14	1.65509e-12	Heyl
ENSMUSG00000025465	2395.77	-0.522851	0.0702088	1.86813e-14	1.7886e-12	Echs1
ENSMUSG00000025579	2318.04	0.687901	0.0929145	1.88533e-14	1.79481e-12	Gaa
ENSMUSG00000028071	439.238	-1.13994	0.155929	2.06636e-14	1.95603e-12	Sh2d2a
ENSMUSG00000002500	165.62	-2.41611	0.34058	2.2106e-14	2.08082e-12	Rpl3l
ENSMUSG00000028270	1124.2	-1.02792	0.141478	2.33925e-14	2.18962e-12	Gbp2
ENSMUSG00000034614	2311.27	-0.910097	0.124601	2.36115e-14	2.19783e-12	Pik3ip1
ENSMUSG00000026029	8106.85	-0.769084	0.105058	2.43796e-14	2.25679e-12	Casp8
ENSMUSG00000031904	2677	0.463961	0.0625523	3.03737e-14	2.79622e-12	Slc7a6
ENSMUSG00000059027	74.2711	-2.84221	0.395311	3.51287e-14	3.2163e-12	9630013D21Rik
ENSMUSG00000027559	484.909	0.822349	0.113119	3.81774e-14	3.47643e-12	Car3
ENSMUSG00000041974	2105.35	-0.719	0.0992096	4.87129e-14	4.41181e-12	Spidr
ENSMUSG00000022048	2756.92	-0.610872	0.0838451	5.3086e-14	4.78202e-12	Dpysl2
ENSMUSG00000019087	6482.44	-0.562077	0.0768931	5.50124e-14	4.92905e-12	Atp6ap1
ENSMUSG00000030498	823.687	1.17295	0.163836	5.71817e-14	5.09617e-12	Gas2
ENSMUSG00000031813	2193.5	-0.653371	0.091696	5.92784e-14	5.25508e-12	Mvb12a
ENSMUSG00000022831	5775.09	-0.700624	0.0966799	6.61913e-14	5.83703e-12	Hcls1
ENSMUSG00000054675	2956.66	1.00483	0.140839	7.74626e-14	6.79521e-12	Tmem119
ENSMUSG00000037234	792.907	-1.14646	0.161113	7.8003e-14	6.80698e-12	Hook3
ENSMUSG00000051998	1118.93	-0.972508	0.136672	9.18731e-14	7.97583e-12	Lax1
ENSMUSG00000000058	1051.34	-1.5648	0.221738	9.65956e-14	8.34258e-12	Cav2
ENSMUSG00000028655	80.3116	2.61868	0.379142	1.32523e-13	1.13868e-11	Mfsd2a
ENSMUSG00000032436	24590.8	-0.472986	0.0656439	1.43533e-13	1.22699e-11	Cmtm7
ENSMUSG00000036278	615.537	0.857968	0.121372	1.56569e-13	1.33163e-11	Macrod1
ENSMUSG00000021114	5448.82	-0.670846	0.0945175	1.75503e-13	1.48272e-11	Atp6v1d
ENSMUSG00000025878	2488.26	-0.695164	0.0982307	1.76104e-13	1.48272e-11	Uimc1
ENSMUSG00000018509	247.194	1.43212	0.205419	1.95319e-13	1.63629e-11	Cenpv
ENSMUSG00000048924	945.201	-1.07457	0.153932	2.0797e-13	1.7336e-11	Ccdc125
ENSMUSG00000045667	3213.81	-1.55601	0.225179	2.21521e-13	1.83741e-11	Smtnl2
ENSMUSG00000032596	3186.67	-0.815577	0.116472	2.31327e-13	1.9093e-11	Uba7
ENSMUSG00000037847	621.976	-0.922104	0.132209	2.54689e-13	2.09182e-11	Nmrk1
ENSMUSG00000028602	43.8918	-5.01237	0.725199	3.01459e-13	2.46387e-11	Tnfrsf8
ENSMUSG00000046157	4363.03	0.992187	0.142378	3.11763e-13	2.53572e-11	Tmem229b
ENSMUSG00000028214	378.946	-1.22028	0.17671	3.27549e-13	2.65125e-11	Gem
ENSMUSG00000047434	2621.99	0.493715	0.0697455	3.30835e-13	2.66497e-11	Xxylt1
ENSMUSG00000016262	206.773	-2.92333	0.435499	4.2406e-13	3.39959e-11	Sertad4
ENSMUSG00000026255	286.129	-1.78438	0.261543	4.2656e-13	3.40334e-11	Efhd1
ENSMUSG00000013707	640.744	-0.913976	0.132448	4.6869e-13	3.6868e-11	Tnfaip8l2
ENSMUSG00000025278	152.673	-2.38036	0.349566	4.67989e-13	3.6868e-11	Flnb
ENSMUSG00000026618	4909.62	0.534784	0.0765521	4.67993e-13	3.6868e-11	Iars2
ENSMUSG00000033111	713.99	-0.86164	0.125054	5.04668e-13	3.95126e-11	3830406C13Rik
ENSMUSG00000019188	4275.62	-0.573729	0.0822242	5.14492e-13	3.99653e-11	H13
ENSMUSG00000061086	2255.05	1.25736	0.182848	5.1522e-13	3.99653e-11	Myl4
ENSMUSG00000021938	4193.97	0.642232	0.0925349	5.37375e-13	4.14918e-11	Pspc1
ENSMUSG00000041298	622.584	1.06941	0.156082	5.44659e-13	4.18613e-11	Katnal1
ENSMUSG00000038070	861.312	-0.96845	0.141749	6.75058e-13	5.16466e-11	Cntln
ENSMUSG00000008540	1306.68	-1.13848	0.167757	7.8955e-13	6.01314e-11	Mgst1
ENSMUSG00000028927	758.558	1.2135	0.178971	8.35779e-13	6.33642e-11	Padi2
ENSMUSG00000070643	186.404	1.26907	0.187976	8.91761e-13	6.73038e-11	Sox13
ENSMUSG00000075702	378.033	-1.261	0.186791	9.08493e-13	6.82592e-11	Selenom
ENSMUSG00000039934	436.643	-1.32355	0.197003	1.00293e-12	7.5018e-11	Gsap
ENSMUSG00000020577	35832.3	-0.888456	0.130809	1.00889e-12	7.51285e-11	Tspan13
ENSMUSG00000032298	1445.07	-1.02894	0.152605	1.02837e-12	7.62407e-11	Neil1
ENSMUSG00000012428	651.406	-2.69109	0.405215	1.06966e-12	7.89525e-11	Steap4
ENSMUSG00000029771	2381.84	-0.718639	0.105689	1.2342e-12	9.06974e-11	Irf5
ENSMUSG00000033880	4390.71	0.591914	0.0859443	1.24984e-12	9.14458e-11	Lgals3bp
ENSMUSG00000074272	1061.37	-0.683918	0.100678	1.3904e-12	1.01288e-10	Ceacam1
ENSMUSG00000058470	123.907	-1.93534	0.291618	1.40147e-12	1.01652e-10	Gm8369
ENSMUSG00000027742	3071.97	-0.605487	0.08836	1.60304e-12	1.15772e-10	Cog6
ENSMUSG00000085379	116.5	1.36155	0.204288	1.64378e-12	1.18204e-10	2310058D17Rik
ENSMUSG00000034361	1864.4	0.86857	0.12943	1.73705e-12	1.24377e-10	Cpne2
ENSMUSG00000017756	1846.18	-1.04896	0.157458	1.94608e-12	1.38751e-10	Slc12a7
ENSMUSG00000049744	5778.83	-0.654945	0.097414	2.16043e-12	1.53381e-10	Arhgap15
ENSMUSG00000020034	1562.09	-1.10047	0.165575	2.21927e-12	1.5682e-10	Tcp11l2
ENSMUSG00000072964	5738.29	0.597116	0.0881496	2.22759e-12	1.5682e-10	Bhlhb9
ENSMUSG00000039770	1680.93	-0.893054	0.134647	2.90396e-12	2.02732e-10	Ypel5
ENSMUSG00000059883	431.355	-1.11221	0.168409	2.89278e-12	2.02732e-10	Irak4
ENSMUSG00000025262	249.014	1.95134	0.298295	2.98279e-12	2.07372e-10	Fam120c
ENSMUSG00000026921	1831.92	0.603792	0.0902792	3.31427e-12	2.29466e-10	Egfl7
ENSMUSG00000023348	633.461	-0.797011	0.120368	3.70144e-12	2.55216e-10	Trip6
ENSMUSG00000032515	1439.35	-0.858397	0.130056	3.77588e-12	2.59282e-10	Csrnp1
ENSMUSG00000020423	3189.21	-1.00402	0.153185	3.97618e-12	2.71922e-10	Btg2
ENSMUSG00000069516	5287.57	-0.700798	0.105674	4.12611e-12	2.81029e-10	Lyz2
ENSMUSG00000022519	1183.94	1.11338	0.170296	4.48758e-12	3.0441e-10	Srl
ENSMUSG00000026767	1090.35	-0.657192	0.0994769	4.70964e-12	3.18185e-10	Mindy3
ENSMUSG00000037922	371.282	-1.05804	0.161868	4.73273e-12	3.18461e-10	Bank1
ENSMUSG00000027533	2476.56	0.860719	0.1312	5.07448e-12	3.38737e-10	Fabp5
ENSMUSG00000044734	7897.26	0.763096	0.11586	5.06543e-12	3.38737e-10	Serpinb1a
ENSMUSG00000029299	328.814	-1.47465	0.227884	6.35438e-12	4.22491e-10	Abcg3
ENSMUSG00000003528	11508.4	0.607771	0.092175	6.78006e-12	4.49011e-10	Slc25a1
ENSMUSG00000019872	824.106	-1.11733	0.172584	6.85813e-12	4.5207e-10	Smpdl3a
ENSMUSG00000041538	4666.75	-0.676608	0.103092	6.88021e-12	4.5207e-10	H2-Ob
ENSMUSG00000060675	962.381	-0.758475	0.116364	7.84965e-12	5.13754e-10	Pla2g16
ENSMUSG00000024835	11240.8	-0.508674	0.076838	7.88995e-12	5.14382e-10	Coro1b
ENSMUSG00000028337	4958.11	0.644887	0.0984765	8.23682e-12	5.34915e-10	Coro2a
ENSMUSG00000005506	7126.1	0.660119	0.101127	8.6339e-12	5.58537e-10	Celf1
ENSMUSG00000046480	1134.56	-1.43427	0.223886	8.81023e-12	5.67751e-10	Scn4b
ENSMUSG00000027805	262.236	1.66428	0.263491	9.70372e-12	6.22935e-10	Pfn2
ENSMUSG00000085110	128.254	-1.54209	0.241659	9.89402e-12	6.32726e-10	Gm13920
ENSMUSG00000028093	8562.35	-0.760078	0.1174	1.00425e-11	6.39778e-10	Acp6
ENSMUSG00000021451	5001.01	0.771136	0.119463	1.0642e-11	6.75402e-10	Sema4d
ENSMUSG00000046688	25093.7	-0.828946	0.128535	1.13503e-11	7.1764e-10	Tifa
ENSMUSG00000050379	7210.93	-0.431333	0.0653257	1.17288e-11	7.3878e-10	Sept6
ENSMUSG00000030447	4324.02	-0.580808	0.0895672	1.43252e-11	8.98947e-10	Cyfip1
ENSMUSG00000041353	891.395	-0.833222	0.129842	1.46834e-11	9.17984e-10	Tmem29
ENSMUSG00000020143	5612.1	-1.05688	0.16668	1.58547e-11	9.8387e-10	Dock2
ENSMUSG00000107061	237.538	-1.40066	0.221914	1.58536e-11	9.8387e-10	Gm19590
ENSMUSG00000089718	589.295	0.89939	0.140971	1.59347e-11	9.85187e-10	2310075C17Rik
ENSMUSG00000043263	10177.8	-0.926686	0.145854	1.60344e-11	9.87705e-10	Ifi209
ENSMUSG00000116762	143.074	-2.51551	0.402295	1.70139e-11	1.04421e-09	AC161376.1
ENSMUSG00000040613	922.348	-0.70087	0.10926	1.7448e-11	1.06694e-09	Apobec1
ENSMUSG00000005474	4595.47	0.860279	0.135219	1.82511e-11	1.11199e-09	Myl10
ENSMUSG00000019820	1281.24	-0.8686	0.13638	1.84868e-11	1.12227e-09	Utrn
ENSMUSG00000038393	2244.11	-0.763063	0.119791	2.04131e-11	1.23473e-09	Txnip
ENSMUSG00000116409	710.478	-1.10764	0.176364	2.09922e-11	1.2652e-09	AL611986.1
ENSMUSG00000046985	13148.2	-0.647542	0.101256	2.18914e-11	1.31466e-09	Tapt1
ENSMUSG00000030921	3468.62	-0.678062	0.106423	2.29426e-11	1.37287e-09	Trim30a
ENSMUSG00000046687	694.735	0.802575	0.12666	2.42329e-11	1.44492e-09	Gm5424
ENSMUSG00000032698	1685.1	0.546082	0.0852003	2.48326e-11	1.47543e-09	Lmo2
ENSMUSG00000031712	89.0219	-3.53476	0.571165	2.55933e-11	1.51525e-09	Il15
ENSMUSG00000073481	3873.47	-0.612511	0.095974	2.63866e-11	1.55672e-09	Marc2
ENSMUSG00000033335	6711.46	-0.522178	0.0816236	2.76539e-11	1.62576e-09	Dnm2
ENSMUSG00000024766	1492.37	-0.852105	0.135299	2.8537e-11	1.67181e-09	Lipo3
ENSMUSG00000028689	456.967	-0.857346	0.136344	2.9567e-11	1.72611e-09	Ccdc163
ENSMUSG00000040746	3397.23	-0.679394	0.107354	3.09482e-11	1.80048e-09	Rnf167
ENSMUSG00000024143	709.706	1.60624	0.260139	3.27103e-11	1.8964e-09	Rhoq
ENSMUSG00000031453	9955.69	-0.617418	0.098066	3.2873e-11	1.89927e-09	Rasa3
ENSMUSG00000037071	390.639	1.35337	0.218173	3.39944e-11	1.95731e-09	Scd1
ENSMUSG00000005103	18140.4	-0.388056	0.0600232	3.45789e-11	1.98414e-09	Wdr1
ENSMUSG00000046058	225.231	1.12232	0.180386	3.57676e-11	2.04535e-09	Eid2
ENSMUSG00000037544	7915.03	-0.396076	0.0613433	3.60782e-11	2.05609e-09	Dlgap5
ENSMUSG00000078439	450.991	-0.972138	0.155923	3.70982e-11	2.10705e-09	Smim24
ENSMUSG00000068407	2079.06	0.585506	0.09224	3.7285e-11	2.11051e-09	Rnase12
ENSMUSG00000032769	48.8252	-5.45108	0.937121	4.04931e-11	2.28438e-09	Trpa1
ENSMUSG00000022708	290.518	-1.26531	0.20558	4.34567e-11	2.44334e-09	Zbtb20
ENSMUSG00000078517	4340.52	0.836036	0.133995	4.36793e-11	2.44765e-09	Emc1
ENSMUSG00000027514	246.308	-1.4332	0.233259	4.81096e-11	2.68692e-09	Zbp1
ENSMUSG00000054517	800.416	1.08598	0.175934	5.10618e-11	2.84233e-09	Trim65
ENSMUSG00000006763	1804.82	-0.752842	0.120597	5.28806e-11	2.93382e-09	Saal1
ENSMUSG00000048215	292.836	-1.91812	0.314828	5.61155e-11	3.10302e-09	A630023P12Rik
ENSMUSG00000029759	860.157	-0.75419	0.121664	5.7696e-11	3.17992e-09	Pon3
ENSMUSG00000038943	9957.29	-0.360892	0.0564187	6.07617e-11	3.33791e-09	Prc1
ENSMUSG00000022504	129.197	2.29528	0.382017	6.66761e-11	3.65084e-09	Ciita
ENSMUSG00000043004	625.685	-0.826942	0.134034	6.81441e-11	3.71907e-09	Gng2
ENSMUSG00000001053	2907.45	-0.859359	0.140008	7.5115e-11	4.08621e-09	N4bp3
ENSMUSG00000041781	7602.5	-0.503302	0.0796744	7.5758e-11	4.10785e-09	Cpsf2
ENSMUSG00000008398	1604.65	-0.779659	0.126599	7.7544e-11	4.19113e-09	Elk3
ENSMUSG00000022768	81.3244	2.12132	0.35114	7.83976e-11	4.22364e-09	Ccdc116
ENSMUSG00000022594	834.998	0.949791	0.155804	8.77484e-11	4.71226e-09	Lynx1
ENSMUSG00000038352	5971.21	-0.636312	0.103594	8.91559e-11	4.77255e-09	Arl5c
ENSMUSG00000066621	1374	-0.852908	0.139691	9.11094e-11	4.86158e-09	Tecpr1
ENSMUSG00000038623	1696.36	-0.471776	0.0753749	9.19633e-11	4.89157e-09	Tm6sf1
ENSMUSG00000003623	2693.3	-0.530813	0.084265	9.27108e-11	4.90342e-09	Crot
ENSMUSG00000032116	18544.4	-0.47062	0.0751584	9.27713e-11	4.90342e-09	Stt3a
ENSMUSG00000037548	402.926	1.34862	0.223517	1.00713e-10	5.30646e-09	H2-DMb2
ENSMUSG00000049625	7132.14	0.416401	0.0663364	1.03247e-10	5.42289e-09	Tifab
ENSMUSG00000031134	4745.31	-0.336695	0.0531328	1.04803e-10	5.4874e-09	Rbmx
ENSMUSG00000017830	801.69	-0.812809	0.133271	1.05184e-10	5.49019e-09	Dhx58
ENSMUSG00000033706	3439.83	0.562141	0.0907784	1.05678e-10	5.49889e-09	Smyd5
ENSMUSG00000034116	13574.7	-0.320326	0.0510732	1.07384e-10	5.57034e-09	Vav1
ENSMUSG00000015224	958.901	-0.899126	0.148309	1.09584e-10	5.64529e-09	Cyp2j9
ENSMUSG00000026687	4944.71	-0.501814	0.0807874	1.09816e-10	5.64529e-09	Aldh9a1
ENSMUSG00000055421	83.1995	-3.7949	0.664067	1.0984e-10	5.64529e-09	Pcdh9
ENSMUSG00000056481	63.6236	2.48713	0.417255	1.27676e-10	6.54191e-09	Cd248
ENSMUSG00000022844	302.562	1.39638	0.233542	1.28865e-10	6.58272e-09	Pdia5
ENSMUSG00000030880	2570.86	0.384867	0.0614413	1.30027e-10	6.62191e-09	Polr3e
ENSMUSG00000052087	652.017	-0.603913	0.0983943	1.30827e-10	6.64244e-09	Rgs14
ENSMUSG00000000552	364.876	0.621143	0.101266	1.31645e-10	6.66377e-09	Zfp385a
ENSMUSG00000042210	1539.31	0.921655	0.153097	1.46219e-10	7.37919e-09	Abhd14a
ENSMUSG00000027478	1160.9	-0.990282	0.165188	1.62543e-10	8.17843e-09	Dnmt3b
ENSMUSG00000079853	61.2232	-2.47152	0.421615	1.82266e-10	9.1433e-09	Klra1
ENSMUSG00000020182	405.81	1.08902	0.182606	1.85879e-10	9.29674e-09	Ddc
ENSMUSG00000063450	616.437	-1.06092	0.178381	1.90922e-10	9.52053e-09	Syne2
ENSMUSG00000037936	6033.35	0.396152	0.0641721	2.09972e-10	1.04394e-08	Scarb1
ENSMUSG00000031402	10877.9	-0.615245	0.102651	2.25163e-10	1.11616e-08	Mpp1
ENSMUSG00000022307	6378.25	-0.581129	0.0959097	2.40349e-10	1.18792e-08	Oxr1
ENSMUSG00000045973	4554.03	0.411567	0.0669312	2.61758e-10	1.28993e-08	Slc25a51
ENSMUSG00000000682	6982.34	0.606317	0.100747	2.65242e-10	1.30326e-08	Cd52
ENSMUSG00000023328	87.6928	2.92281	0.53097	2.70979e-10	1.32369e-08	Ache
ENSMUSG00000025511	990.334	0.787923	0.132178	2.70621e-10	1.32369e-08	Tspan4
ENSMUSG00000042757	2475.12	0.529673	0.0874021	2.81055e-10	1.36892e-08	Tmem108
ENSMUSG00000026585	715.784	-0.651087	0.108962	3.09045e-10	1.50088e-08	Kifap3
ENSMUSG00000031819	3806.35	0.403423	0.0662092	3.15169e-10	1.5262e-08	Emc8
ENSMUSG00000029798	462.29	-1.2088	0.206671	3.18658e-10	1.53865e-08	Herc6
ENSMUSG00000026594	1879.14	0.686482	0.115242	3.23072e-10	1.55548e-08	Ralgps2
ENSMUSG00000020432	988.148	-0.970759	0.16621	3.2981e-10	1.58337e-08	Tcn2
ENSMUSG00000048277	5227.95	0.449691	0.0740439	3.31342e-10	1.58618e-08	Syngr2
ENSMUSG00000086350	173.493	1.27569	0.218458	3.3269e-10	1.5881e-08	B230369F24Rik
ENSMUSG00000025006	322.926	-0.967312	0.165172	3.47525e-10	1.6542e-08	Sorbs1
ENSMUSG00000073791	234.237	-1.2791	0.219706	3.74265e-10	1.77643e-08	Efcab7
ENSMUSG00000022686	1853.89	0.965025	0.16466	3.85086e-10	1.82263e-08	B3gnt5
ENSMUSG00000001436	5119.1	0.609742	0.102098	3.99761e-10	1.8786e-08	Slc19a1
ENSMUSG00000002996	1113.65	-0.863108	0.147017	4.00274e-10	1.8786e-08	Hbp1
ENSMUSG00000041911	64.774	-2.65627	0.461471	3.99115e-10	1.8786e-08	Dlx1
ENSMUSG00000030654	46451.5	-0.426652	0.0702947	4.37433e-10	2.04726e-08	Arl6ip1
ENSMUSG00000061132	42753.4	-0.512524	0.0856806	4.48922e-10	2.09518e-08	Blnk
ENSMUSG00000073557	269.049	1.49502	0.260139	5.23642e-10	2.43712e-08	Ppp1r12b
ENSMUSG00000025656	159.427	-1.62405	0.283245	5.30424e-10	2.46184e-08	Arhgef9
ENSMUSG00000037236	18927.7	0.626172	0.106114	5.3431e-10	2.47303e-08	Matr3
ENSMUSG00000028559	9597.26	-0.503893	0.0846983	5.36376e-10	2.47575e-08	Osbpl9
ENSMUSG00000028434	8246.37	0.537246	0.0905299	5.57911e-10	2.56808e-08	Epb41l4b
ENSMUSG00000028397	1377.86	-0.954142	0.165042	5.66812e-10	2.6019e-08	Kdm4c
ENSMUSG00000025151	2299.89	-0.761224	0.130642	6.11138e-10	2.79771e-08	Maged1
ENSMUSG00000056209	1345.89	0.712294	0.122055	6.18724e-10	2.82472e-08	Npm3
ENSMUSG00000011254	441.417	0.758948	0.130391	6.54565e-10	2.98023e-08	Thg1l
ENSMUSG00000039230	3467.88	-0.539271	0.0913494	6.58742e-10	2.99112e-08	Tbcd
ENSMUSG00000058135	1246.79	-0.928489	0.161298	6.62274e-10	2.99903e-08	Gstm1
ENSMUSG00000015575	4613.81	-0.423058	0.0711182	7.23211e-10	3.26615e-08	Atp6v0e
ENSMUSG00000003344	2219.13	0.609858	0.103468	7.30982e-10	3.29237e-08	Btbd2
ENSMUSG00000048440	386.783	-0.972977	0.169419	7.35426e-10	3.3035e-08	Cyp4f16
ENSMUSG00000028344	195.221	-1.8963	0.335398	7.43567e-10	3.33114e-08	Invs
ENSMUSG00000056665	854.012	1.01676	0.177332	7.543e-10	3.37021e-08	Them6
ENSMUSG00000030217	1442.03	-0.700246	0.12062	7.60861e-10	3.39048e-08	Art4
ENSMUSG00000032187	35374.2	-0.733631	0.127013	7.8439e-10	3.48606e-08	Smarca4
ENSMUSG00000036356	1307.01	-1.00589	0.176031	8.24102e-10	3.65286e-08	Csgalnact1
ENSMUSG00000024132	1612.63	-0.510772	0.0868489	8.31629e-10	3.6765e-08	Eci1
ENSMUSG00000031490	3150.66	0.562171	0.0959165	8.4504e-10	3.72596e-08	Eif4ebp1
ENSMUSG00000028207	870.734	1.01905	0.178608	8.65935e-10	3.80807e-08	Asph
ENSMUSG00000045817	8482.13	0.581707	0.0998061	9.63569e-10	4.22633e-08	Zfp36l2
ENSMUSG00000023353	1499.81	0.629831	0.108766	1.03034e-09	4.5074e-08	Agap3
ENSMUSG00000028788	14604.5	0.346653	0.0583738	1.12654e-09	4.91541e-08	Ptp4a2
ENSMUSG00000024537	5573.64	0.519219	0.0886184	1.13513e-09	4.94002e-08	Psmg2
ENSMUSG00000041801	605.993	1.0111	0.179377	1.16794e-09	5.06965e-08	Phlda3
ENSMUSG00000031360	4484.58	-0.424665	0.0726202	1.1719e-09	5.0737e-08	Ctps2
ENSMUSG00000029304	264.337	-1.1376	0.201958	1.17658e-09	5.08082e-08	Spp1
ENSMUSG00000039109	1318.97	-1.19793	0.213341	1.18783e-09	5.11624e-08	F13a1
ENSMUSG00000032826	21.002	-7.41186	1.61802	1.24691e-09	5.35692e-08	Ank2
ENSMUSG00000004631	285.527	-1.24304	0.221921	1.31063e-09	5.60193e-08	Sgce
ENSMUSG00000024781	1613.4	-0.634386	0.110701	1.30884e-09	5.60193e-08	Lipa
ENSMUSG00000025014	90801.5	-0.521563	0.090013	1.33879e-09	5.70775e-08	Dntt
ENSMUSG00000036944	781.242	-1.01981	0.180887	1.35178e-09	5.7485e-08	Tmem71
ENSMUSG00000068417	981.207	0.817068	0.143998	1.41722e-09	6.01154e-08	Pnp2
ENSMUSG00000029338	502.28	-0.885937	0.156946	1.43278e-09	6.04689e-08	Antxr2
ENSMUSG00000039264	474.816	-1.17506	0.210293	1.43118e-09	6.04689e-08	Gimap3
ENSMUSG00000046402	295.895	-1.04038	0.185808	1.45686e-09	6.13309e-08	Rbp1
ENSMUSG00000040010	8004.17	0.668755	0.11722	1.5081e-09	6.33288e-08	Slc7a5
ENSMUSG00000015291	5174.86	-0.765495	0.135343	1.61562e-09	6.75692e-08	Gdi1
ENSMUSG00000058392	3849.61	0.637984	0.111235	1.61715e-09	6.75692e-08	Rrp1b
ENSMUSG00000029030	8762.59	-0.436572	0.0751085	1.64778e-09	6.8678e-08	Tprgl
ENSMUSG00000002699	355.769	-1.46019	0.263554	1.68246e-09	6.99494e-08	Lcp2
ENSMUSG00000022914	770.678	0.856668	0.152394	1.70959e-09	7.08976e-08	Brwd1
ENSMUSG00000038894	405.413	-0.994979	0.178764	1.71373e-09	7.08976e-08	Irs2
ENSMUSG00000096210	5195.2	-0.720673	0.127565	1.81007e-09	7.46987e-08	H1f0
ENSMUSG00000026000	2215.93	-0.490257	0.0863407	2.03034e-09	8.35832e-08	Lancl1
ENSMUSG00000097595	26.1916	-3.04537	0.557047	2.04338e-09	8.39139e-08	1500002F19Rik
ENSMUSG00000046329	330.502	1.06953	0.192691	2.12556e-09	8.70753e-08	Slc25a23
ENSMUSG00000037580	759.329	-0.624367	0.110458	2.26004e-09	9.23585e-08	Gch1
ENSMUSG00000028476	78.2586	-1.77867	0.324926	2.34123e-09	9.54434e-08	Reck
ENSMUSG00000015176	10028.2	0.567651	0.100062	2.38091e-09	9.68256e-08	Nolc1
ENSMUSG00000042055	2486.18	-0.603887	0.107092	2.38759e-09	9.6862e-08	Wdr11
ENSMUSG00000026525	266.313	0.920211	0.16578	2.42474e-09	9.81317e-08	Opn3
ENSMUSG00000042613	2022.01	-1.00322	0.181966	2.52481e-09	1.01936e-07	Pbxip1
ENSMUSG00000037300	3979.39	0.372538	0.0644716	2.67226e-09	1.07629e-07	Ttc13
ENSMUSG00000022353	926.513	-0.610596	0.108569	2.68817e-09	1.0801e-07	Mtss1
ENSMUSG00000057069	818.934	-0.856026	0.154187	2.89189e-09	1.15918e-07	Ero1lb
ENSMUSG00000041220	5828.54	0.513007	0.090172	2.99898e-09	1.19923e-07	Elovl6
ENSMUSG00000034353	7337.37	0.583029	0.103562	3.12948e-09	1.24844e-07	Ramp1
ENSMUSG00000048310	936.291	-0.50723	0.0896475	3.13804e-09	1.24888e-07	Pskh1
ENSMUSG00000006127	4295.59	-0.451983	0.0790716	3.16935e-09	1.25835e-07	Inpp5k
ENSMUSG00000020186	1002.24	-0.515496	0.0913546	3.1778e-09	1.25872e-07	Csrp2
ENSMUSG00000028459	3403	-0.681453	0.122688	3.27634e-09	1.2947e-07	Cd72
ENSMUSG00000030047	3265.32	-0.629086	0.112486	3.30635e-09	1.30348e-07	Arhgap25
ENSMUSG00000003484	951.3	-1.21633	0.223221	3.33596e-09	1.31207e-07	Cyp4f18
ENSMUSG00000021265	201.316	1.14786	0.210344	3.36234e-09	1.31934e-07	Slc25a29
ENSMUSG00000056214	1782.97	0.557232	0.0990111	3.55166e-09	1.39037e-07	Pard6g
ENSMUSG00000062646	403.913	-0.999111	0.182912	3.64011e-09	1.42168e-07	Ganc
ENSMUSG00000021493	800.016	0.644366	0.116247	3.85362e-09	1.50157e-07	Pdlim7
ENSMUSG00000030672	592.153	-0.717889	0.129875	3.91234e-09	1.52091e-07	Mylpf
ENSMUSG00000052914	311.885	-1.1429	0.210547	3.98388e-09	1.54514e-07	Cyp2j6
ENSMUSG00000049717	953.088	-0.727111	0.131826	4.00449e-09	1.54954e-07	Lig4
ENSMUSG00000021665	1173.78	-0.542808	0.0973061	4.33157e-09	1.67224e-07	Hexb
ENSMUSG00000002409	201.416	-1.4172	0.263618	4.35606e-09	1.67783e-07	Dyrk1b
ENSMUSG00000024403	154.653	1.39146	0.259026	4.37022e-09	1.67943e-07	Atp6v1g2
ENSMUSG00000073433	80.6433	1.82166	0.339255	4.38044e-09	1.6795e-07	Arhgdig
ENSMUSG00000020894	1524.46	0.529581	0.093809	4.40988e-09	1.68693e-07	Vamp2
ENSMUSG00000007656	7019.91	0.325708	0.0571583	4.45829e-09	1.6977e-07	Arpp19
ENSMUSG00000018442	2759	-0.35697	0.0627064	4.44828e-09	1.6977e-07	Derl2
ENSMUSG00000019960	5430	-0.565311	0.101859	4.72743e-09	1.7961e-07	Dusp6
ENSMUSG00000040723	17156.3	-0.450534	0.08025	5.10691e-09	1.93589e-07	Rcsd1
ENSMUSG00000020166	11536.5	-0.38447	0.0680537	5.12855e-09	1.9397e-07	Cnot2
ENSMUSG00000053965	230.419	-1.48747	0.279052	5.14823e-09	1.94276e-07	Pde5a
ENSMUSG00000031156	1062.14	-0.520066	0.0934055	5.17012e-09	1.94664e-07	Slc35a2
ENSMUSG00000020125	1545.93	-3.94895	0.763762	5.25939e-09	1.97581e-07	Elane
ENSMUSG00000089762	129.224	1.28372	0.239418	5.30798e-09	1.9896e-07	Ier5l
ENSMUSG00000028766	5573.49	-0.638964	0.11671	5.86598e-09	2.19385e-07	Alpl
ENSMUSG00000085417	825.753	-0.766241	0.141347	6.1941e-09	2.3114e-07	Gm13919
ENSMUSG00000020160	482.394	-0.78997	0.146503	6.83248e-09	2.54396e-07	Meis1
ENSMUSG00000022346	12726.5	0.59125	0.108485	6.8894e-09	2.55947e-07	Myc
ENSMUSG00000039682	5209.71	0.467402	0.0843165	7.12824e-09	2.64234e-07	Lap3
ENSMUSG00000056091	495.061	1.00408	0.188381	7.57126e-09	2.80036e-07	St3gal5
ENSMUSG00000000958	368.275	-1.16876	0.220822	7.82935e-09	2.88944e-07	Slc7a7
ENSMUSG00000057541	4556.29	0.547131	0.0999313	7.94585e-09	2.92599e-07	Pus7
ENSMUSG00000023118	3064.08	0.567919	0.103405	8.08594e-09	2.97105e-07	Sympk
ENSMUSG00000042719	2892.81	0.460281	0.0836352	8.43754e-09	3.09346e-07	Naa25
ENSMUSG00000025140	609.41	1.07383	0.202613	8.49764e-09	3.10869e-07	Pycr1
ENSMUSG00000024286	2027.19	0.54447	0.0997217	8.68695e-09	3.16413e-07	Ccny
ENSMUSG00000051007	1417.46	-0.469463	0.0853119	8.683e-09	3.16413e-07	Gatd1
ENSMUSG00000092274	136.589	-1.38794	0.264827	8.74019e-09	3.17661e-07	Neat1
ENSMUSG00000020053	61.5336	-2.38429	0.462112	8.82432e-09	3.1939e-07	Igf1
ENSMUSG00000060992	11687.2	-0.341205	0.0605792	8.82589e-09	3.1939e-07	Copz1
ENSMUSG00000048163	7858.59	-0.512712	0.0941525	9.51991e-09	3.43763e-07	Selplg
ENSMUSG00000028101	776.494	-0.86722	0.16411	9.82095e-09	3.53871e-07	Pias3
ENSMUSG00000029623	2420.75	0.491854	0.0896061	9.99542e-09	3.59288e-07	Pdap1
ENSMUSG00000038005	6199.59	-0.580935	0.107482	1.00142e-08	3.59288e-07	Hpf1
ENSMUSG00000028010	2786.22	0.389165	0.0702092	1.02439e-08	3.66743e-07	Gar1
ENSMUSG00000029153	133.203	1.46223	0.280944	1.04213e-08	3.723e-07	Ociad2
ENSMUSG00000086763	139.229	-1.61448	0.309986	1.04542e-08	3.72681e-07	Plxna4os1
ENSMUSG00000029802	1095.99	-0.55922	0.103259	1.05007e-08	3.73545e-07	Abcg2
ENSMUSG00000006369	129.442	1.95803	0.380723	1.1654e-08	4.13693e-07	Fbln1
ENSMUSG00000039826	1406.61	0.525316	0.0966209	1.16986e-08	4.14397e-07	Trub2
ENSMUSG00000021703	1496.79	-1.07914	0.206455	1.21926e-08	4.30987e-07	Serinc5
ENSMUSG00000073421	6740.95	0.558478	0.103959	1.29417e-08	4.56502e-07	H2-Ab1
ENSMUSG00000039531	1279.47	-0.531966	0.0987509	1.31994e-08	4.64612e-07	Zufsp
ENSMUSG00000050957	625.738	-0.784391	0.148616	1.32562e-08	4.65634e-07	Insl6
ENSMUSG00000042265	297.071	-0.926128	0.176966	1.3846e-08	4.85333e-07	Trem1
ENSMUSG00000022824	341.52	-1.10591	0.213137	1.4059e-08	4.91773e-07	Muc13
ENSMUSG00000032363	68.8206	-2.67352	0.522092	1.43359e-08	5.00411e-07	Adamts7
ENSMUSG00000048120	1439.9	-0.933211	0.177917	1.46811e-08	5.11396e-07	Entpd1
ENSMUSG00000026223	1461.81	-0.584121	0.109158	1.49518e-08	5.19747e-07	Itm2c
ENSMUSG00000042216	247.011	-1.31489	0.25646	1.54499e-08	5.35947e-07	Sgsm1
ENSMUSG00000009470	5866.38	0.512167	0.0945064	1.58303e-08	5.48011e-07	Tnpo1
ENSMUSG00000042684	492.39	1.03904	0.200911	1.68667e-08	5.82682e-07	Npl
ENSMUSG00000027187	19987	-0.473808	0.0880694	1.69349e-08	5.83836e-07	Cat
ENSMUSG00000005883	190.399	-1.76248	0.346295	1.7278e-08	5.9444e-07	Spo11
ENSMUSG00000038965	9233.25	0.266152	0.0481356	1.7445e-08	5.98957e-07	Ube2l3
ENSMUSG00000037907	213.882	1.34774	0.264303	1.75364e-08	6.00863e-07	Ankrd13b
ENSMUSG00000034926	690.66	0.605615	0.114201	1.78042e-08	6.08793e-07	Dhcr24
ENSMUSG00000027424	1551.9	0.365635	0.0670396	1.795e-08	6.12529e-07	Mgme1
ENSMUSG00000044037	183.427	-1.83765	0.367074	1.81664e-08	6.18654e-07	Als2cl
ENSMUSG00000031729	5078.84	-0.390688	0.0719337	1.82289e-08	6.19523e-07	Ist1
ENSMUSG00000095677	2160.6	-0.373333	0.0685723	1.82695e-08	6.19645e-07	Dynlt1f
ENSMUSG00000030064	279.289	1.935	0.381745	1.8572e-08	6.28633e-07	Frmd4b
ENSMUSG00000021149	6571.01	0.424585	0.0787189	1.92173e-08	6.49109e-07	Gtpbp4
ENSMUSG00000051067	11.4986	5.51276	1.09565	1.92544e-08	6.49109e-07	Lingo3
ENSMUSG00000001138	1221.84	-0.670292	0.127876	1.97837e-08	6.64279e-07	Cnnm3
ENSMUSG00000026360	1978.72	-0.605779	0.114243	1.97614e-08	6.64279e-07	Rgs2
ENSMUSG00000024681	240.181	-4.23658	0.856552	1.98284e-08	6.6445e-07	Ms4a3
ENSMUSG00000009585	18062.2	-0.345685	0.0634882	1.99136e-08	6.65974e-07	Apobec3
ENSMUSG00000024457	2130.42	-0.394867	0.0730647	2.0028e-08	6.68463e-07	Trim26
ENSMUSG00000025492	2817.95	0.64773	0.123493	2.03311e-08	6.77232e-07	Ifitm3
ENSMUSG00000038370	770.95	-2.05581	0.407776	2.1449e-08	7.13052e-07	Pcp4l1
ENSMUSG00000031887	1641.6	-0.604604	0.115035	2.15525e-08	7.15072e-07	Tradd
ENSMUSG00000041168	6058.43	0.376406	0.0698131	2.17032e-08	7.18649e-07	Lonp1
ENSMUSG00000024665	2657.23	0.505076	0.0946335	2.19253e-08	7.24571e-07	Fads2
ENSMUSG00000030268	10712.4	0.497813	0.0936684	2.2493e-08	7.4187e-07	Bcat1
ENSMUSG00000022471	19919.1	-0.331736	0.0606829	2.28018e-08	7.50578e-07	Xrcc6
ENSMUSG00000021076	5053.42	-0.444158	0.0828731	2.31681e-08	7.6114e-07	Actr10
ENSMUSG00000027219	1701.2	-0.687448	0.132091	2.33365e-08	7.65171e-07	Slc28a2
ENSMUSG00000003848	3990.07	0.475958	0.0891025	2.39679e-08	7.84339e-07	Nob1
ENSMUSG00000001248	3519.9	-0.525352	0.0997978	2.46621e-08	8.03917e-07	Gramd1a
ENSMUSG00000021485	3568.88	-0.512078	0.0984144	2.46195e-08	8.03917e-07	Mxd3
ENSMUSG00000022607	776.067	0.768699	0.149252	2.50526e-08	8.13481e-07	Ptk2
ENSMUSG00000045273	2663.46	-0.627697	0.120116	2.50269e-08	8.13481e-07	Cenph
ENSMUSG00000001576	6628.48	0.423999	0.0805615	2.54336e-08	8.24255e-07	Ergic1
ENSMUSG00000041733	3296.24	0.508895	0.0958336	2.55173e-08	8.2537e-07	Coq5
ENSMUSG00000069910	2194.65	-0.369256	0.0687253	2.58472e-08	8.34432e-07	Spdl1
ENSMUSG00000029322	14796.9	0.531889	0.100974	2.63164e-08	8.47944e-07	Plac8
ENSMUSG00000003363	767.396	-0.676873	0.130531	2.65206e-08	8.52883e-07	Pld3
ENSMUSG00000025190	2311.04	0.521667	0.0989534	2.73093e-08	8.76566e-07	Got1
ENSMUSG00000010048	3144.58	0.648498	0.12511	2.90407e-08	9.30357e-07	Ifrd2
ENSMUSG00000042345	3888.37	0.484642	0.0937003	2.91352e-08	9.31604e-07	Ubash3a
ENSMUSG00000030104	4348.24	-0.339959	0.0630242	2.97819e-08	9.50469e-07	Edem1
ENSMUSG00000029359	13.5952	3.65704	0.720912	3.00988e-08	9.58757e-07	Tesc
ENSMUSG00000040158	637.393	-0.795979	0.156006	3.15106e-08	1.00182e-06	Tax1bp3
ENSMUSG00000005078	1112.62	-0.572097	0.110177	3.19302e-08	1.01324e-06	Jkamp
ENSMUSG00000025212	900.547	-0.637797	0.123503	3.26816e-08	1.03512e-06	Sfxn3
ENSMUSG00000020439	5818.25	-0.523386	0.100323	3.29297e-08	1.04101e-06	Smtn
ENSMUSG00000025209	1270.08	0.740089	0.144411	3.34295e-08	1.05426e-06	Twnk
ENSMUSG00000028173	3860.84	-0.493264	0.0940731	3.34745e-08	1.05426e-06	Wls
ENSMUSG00000044252	911.987	-0.657156	0.127236	3.39838e-08	1.06829e-06	Osbpl1a
ENSMUSG00000030189	16169.5	0.515321	0.0990356	3.42242e-08	1.07383e-06	Ybx3
ENSMUSG00000090698	103.224	-1.66907	0.339461	3.54903e-08	1.11148e-06	Apold1
ENSMUSG00000043008	20531.8	-0.509013	0.0975226	3.62689e-08	1.13374e-06	Klhl6
ENSMUSG00000026707	359.728	-0.863986	0.170772	3.70464e-08	1.15589e-06	Nsun6
ENSMUSG00000079363	384.359	-1.11852	0.223725	3.72717e-08	1.16076e-06	Gbp4
ENSMUSG00000032366	880.779	-0.632059	0.122895	3.79835e-08	1.17959e-06	Tpm1
ENSMUSG00000078713	5258.07	0.556447	0.107197	3.80172e-08	1.17959e-06	Tomm5
ENSMUSG00000020451	2423.8	-0.431456	0.0818699	3.86736e-08	1.19552e-06	Limk2
ENSMUSG00000026361	3331.12	-0.644809	0.125252	3.8774e-08	1.19552e-06	Cdc73
ENSMUSG00000029084	819.287	-1.06366	0.212505	3.88636e-08	1.19552e-06	Cd38
ENSMUSG00000039316	5478.93	-0.408999	0.0775231	3.88875e-08	1.19552e-06	Rftn1
ENSMUSG00000041119	262.347	-1.66427	0.338667	3.87646e-08	1.19552e-06	Pde9a
ENSMUSG00000035212	2380.01	-0.384268	0.072687	4.02826e-08	1.23614e-06	Leprot
ENSMUSG00000020869	18585	0.350174	0.0657228	4.05635e-08	1.24249e-06	Lrrc59
ENSMUSG00000060275	55.3851	-2.28252	0.461775	4.08909e-08	1.25023e-06	Nrg2
ENSMUSG00000057729	438.479	-3.54306	0.755786	4.16663e-08	1.27162e-06	Prtn3
ENSMUSG00000028121	587.59	0.920265	0.183931	4.1903e-08	1.27652e-06	Bcar3
ENSMUSG00000028692	20998.8	0.371888	0.0699095	4.20264e-08	1.27795e-06	Akr1a1
ENSMUSG00000039853	591.79	-0.706043	0.138428	4.27187e-08	1.29665e-06	Trim14
ENSMUSG00000009350	3741.07	-3.69781	0.794397	4.29447e-08	1.30115e-06	Mpo
ENSMUSG00000056498	788.856	-0.856624	0.170607	4.45563e-08	1.34755e-06	Tmem154
ENSMUSG00000023456	18328.4	0.458712	0.0868368	4.51363e-08	1.36263e-06	Tpi1
ENSMUSG00000097039	111.218	1.54982	0.317256	4.70332e-08	1.41734e-06	Pvt1
ENSMUSG00000027936	1337.32	-0.589765	0.115464	4.96368e-08	1.49311e-06	Crtc2
ENSMUSG00000044629	488.721	-0.746917	0.148266	5.00975e-08	1.50427e-06	Cnrip1
ENSMUSG00000020648	676.149	0.799812	0.159338	5.07537e-08	1.52125e-06	Dus4l
ENSMUSG00000037032	594.799	-1.09318	0.22129	5.16584e-08	1.54513e-06	Apbb1
ENSMUSG00000103653	990.718	0.590413	0.11562	5.17349e-08	1.54513e-06	Gstp-ps
ENSMUSG00000038121	1727.15	0.623405	0.121997	5.25049e-08	1.56534e-06	Fam210a
ENSMUSG00000033429	449.239	-0.762626	0.152021	5.51522e-08	1.64134e-06	Mcee
ENSMUSG00000032788	1024.57	0.624771	0.123288	5.64305e-08	1.67641e-06	Pdxk
ENSMUSG00000021830	2169.92	-0.570915	0.111916	5.65379e-08	1.67663e-06	Txndc16
ENSMUSG00000024810	125.597	-1.84596	0.380699	5.69388e-08	1.68553e-06	Il33
ENSMUSG00000031521	612.738	-0.816573	0.164667	5.82548e-08	1.71918e-06	Aga
ENSMUSG00000047221	944.524	0.813739	0.162899	5.82809e-08	1.71918e-06	Fam185a
ENSMUSG00000000078	1217.06	-0.656664	0.130193	5.91883e-08	1.74288e-06	Klf6
ENSMUSG00000020134	2935.36	-0.409441	0.0785799	6.07749e-08	1.78646e-06	Peli1
ENSMUSG00000008496	197.494	0.953383	0.193414	6.38211e-08	1.87272e-06	Pou2f2
ENSMUSG00000020402	11731.5	0.343038	0.0659334	6.53287e-08	1.9136e-06	Vdac1
ENSMUSG00000030649	340.642	-0.620848	0.123118	6.5856e-08	1.92568e-06	Anapc15
ENSMUSG00000026473	1728.6	-0.662901	0.131986	6.6042e-08	1.92776e-06	Glul
ENSMUSG00000040247	18272.6	-0.551461	0.108853	6.71128e-08	1.95561e-06	Tbc1d10c
ENSMUSG00000032589	548.301	0.85118	0.171846	6.74755e-08	1.96276e-06	Bsn
ENSMUSG00000034035	134.137	-1.21148	0.248737	6.78882e-08	1.97135e-06	Ccdc17
ENSMUSG00000033105	539.335	-0.74855	0.150361	6.84209e-08	1.98338e-06	Lss
ENSMUSG00000034274	2170.9	-0.454918	0.089169	7.23337e-08	2.09318e-06	Thoc5
ENSMUSG00000000290	2499.43	-0.506995	0.0998067	7.61764e-08	2.20058e-06	Itgb2
ENSMUSG00000042363	367.792	0.783723	0.158413	7.64203e-08	2.20382e-06	Lgalsl
ENSMUSG00000037216	131.671	1.11822	0.231214	7.67468e-08	2.20565e-06	Lipt1
ENSMUSG00000054452	6984.66	0.481751	0.0943098	7.66997e-08	2.20565e-06	Aes
ENSMUSG00000018287	3687.76	-0.360587	0.0692194	7.85717e-08	2.25123e-06	Spag7
ENSMUSG00000047735	1757.48	0.668675	0.134027	7.86017e-08	2.25123e-06	Samd9l
ENSMUSG00000022092	3316.61	-0.494371	0.0976375	8.03056e-08	2.29611e-06	Ppp3cc
ENSMUSG00000029552	2769.83	-0.447704	0.0874142	8.04817e-08	2.29722e-06	Tes
ENSMUSG00000024654	2980.97	-0.433483	0.0850543	8.08506e-08	2.30383e-06	Asrgl1
ENSMUSG00000020717	3308.89	-0.469438	0.0921986	8.16221e-08	2.32186e-06	Pecam1
ENSMUSG00000032412	56091.8	-0.397509	0.0773533	8.47459e-08	2.40664e-06	Atp1b3
ENSMUSG00000060950	1339.05	0.507162	0.100061	8.52141e-08	2.41584e-06	Trmt61a
ENSMUSG00000024527	4285.42	0.43223	0.084504	8.55754e-08	2.42199e-06	Afg3l2
ENSMUSG00000095079	328.274	-0.0244328	0.263703	8.63991e-08	2.44117e-06	Igha
ENSMUSG00000027430	2102.7	0.418017	0.0816978	8.81311e-08	2.48592e-06	Dtd1
ENSMUSG00000033255	134.733	-1.23201	0.255664	9.09764e-08	2.55902e-06	Gm5134
ENSMUSG00000041515	10505.6	0.334596	0.0645876	9.1028e-08	2.55902e-06	Irf8
ENSMUSG00000025499	2431.18	0.38764	0.0761865	9.177e-08	2.57125e-06	Hras
ENSMUSG00000052337	12651.7	0.359714	0.0693042	9.17008e-08	2.57125e-06	Immt
ENSMUSG00000040387	64.5238	-2.52193	0.532964	9.65887e-08	2.70174e-06	Klhl32
ENSMUSG00000025041	8771.31	0.379296	0.0732777	9.71789e-08	2.71372e-06	Nt5c2
ENSMUSG00000019849	26087.7	-0.402711	0.0780168	9.94499e-08	2.77252e-06	Prep
ENSMUSG00000079614	11583	0.384161	0.0751314	1.00366e-07	2.79341e-06	Seh1l
ENSMUSG00000057113	46438.3	0.545828	0.109153	1.00644e-07	2.7965e-06	Npm1
ENSMUSG00000040554	51.0031	-2.31634	0.494538	1.0537e-07	2.92297e-06	Aipl1
ENSMUSG00000032648	766.131	0.709508	0.144637	1.0569e-07	2.92701e-06	Pygm
ENSMUSG00000027395	4356.09	0.651491	0.131924	1.07048e-07	2.95972e-06	Polr1b
ENSMUSG00000017417	2277.76	-0.587801	0.118837	1.14766e-07	3.16788e-06	Plxdc1
ENSMUSG00000021595	18341	0.428674	0.0847556	1.15007e-07	3.16932e-06	Nsun2
ENSMUSG00000060791	13040.2	-0.39349	0.0790826	1.15284e-07	3.17173e-06	Gmfg
ENSMUSG00000010362	2228.82	-0.52657	0.105831	1.20101e-07	3.29883e-06	Rdm1
ENSMUSG00000045795	625.642	-0.657958	0.134264	1.20333e-07	3.29979e-06	Whamm
ENSMUSG00000000753	1460.23	-0.556087	0.112283	1.26698e-07	3.463e-06	Serpinf1
ENSMUSG00000032185	3264.23	0.498077	0.0998877	1.26693e-07	3.463e-06	Carm1
ENSMUSG00000025007	6135.37	0.403608	0.0798324	1.27934e-07	3.4911e-06	Aldh18a1
ENSMUSG00000000384	1811.76	0.702725	0.145507	1.32554e-07	3.61097e-06	Tbrg4
ENSMUSG00000028383	1970.89	-0.473595	0.0949163	1.32973e-07	3.61097e-06	Hsdl2
ENSMUSG00000028860	370.045	-1.11849	0.2361	1.329e-07	3.61097e-06	Sytl1
ENSMUSG00000003824	3256.04	0.425371	0.0845396	1.36001e-07	3.68721e-06	Syce2
ENSMUSG00000025324	1470.94	-0.997417	0.209182	1.3663e-07	3.69368e-06	Atp10a
ENSMUSG00000037260	899.801	0.717335	0.14774	1.36681e-07	3.69368e-06	Hgsnat
ENSMUSG00000038225	430.697	-0.694379	0.142994	1.42386e-07	3.84168e-06	Primpol
ENSMUSG00000021585	3230.48	-0.54516	0.110496	1.43658e-07	3.86975e-06	Cast
ENSMUSG00000026576	3984.64	-0.584889	0.119275	1.44339e-07	3.88185e-06	Atp1b1
ENSMUSG00000034424	5033.39	0.528373	0.10733	1.49176e-07	4.00553e-06	Gcsh
ENSMUSG00000024866	624.311	-0.784789	0.163299	1.50127e-07	4.0246e-06	Acy3
ENSMUSG00000059336	584.204	-0.780635	0.162865	1.56317e-07	4.18386e-06	Slc14a1
ENSMUSG00000003031	350.584	-0.865358	0.181356	1.60933e-07	4.30054e-06	Cdkn1b
ENSMUSG00000029016	660.257	0.923127	0.194042	1.64839e-07	4.3979e-06	Clcn6
ENSMUSG00000020654	409.86	0.780299	0.163291	1.7688e-07	4.71166e-06	Adcy3
ENSMUSG00000029468	191.634	-0.918181	0.193734	1.78006e-07	4.73412e-06	P2rx7
ENSMUSG00000030714	1478.58	-0.427699	0.0858211	1.78369e-07	4.73625e-06	Sgf29
ENSMUSG00000035891	4644.01	-0.674197	0.140076	1.78888e-07	4.74253e-06	Cerk
ENSMUSG00000101223	83.5627	-1.10821	0.236107	1.82626e-07	4.83395e-06	4930568A12Rik
ENSMUSG00000045751	3831.85	-0.51724	0.105785	1.8464e-07	4.87957e-06	Mms22l
ENSMUSG00000039599	1204.31	-0.507842	0.103683	1.93362e-07	5.10203e-06	Fam149b
ENSMUSG00000086205	23.216	2.40563	0.521684	1.94346e-07	5.11993e-06	Gm12679
ENSMUSG00000032127	2672.97	-0.443686	0.0895953	1.95296e-07	5.13687e-06	Vps11
ENSMUSG00000020882	1149.09	0.717782	0.150074	1.95839e-07	5.14308e-06	Cacnb1
ENSMUSG00000085156	1322.79	0.579309	0.11946	2.00523e-07	5.24963e-06	Snhg15
ENSMUSG00000107744	45.8929	-1.94776	0.427562	2.00359e-07	5.24963e-06	1700072O05Rik
ENSMUSG00000016194	265.564	-1.22284	0.264549	2.03664e-07	5.32353e-06	Hsd11b1
ENSMUSG00000031782	1746.26	0.375205	0.0751881	2.10366e-07	5.49016e-06	Coq9
ENSMUSG00000027303	4527.68	-0.288542	0.0571156	2.10726e-07	5.491e-06	Ptpra
ENSMUSG00000029319	3171.8	0.472015	0.0962508	2.11411e-07	5.50031e-06	Coq2
ENSMUSG00000068735	14309.1	-0.460816	0.0938288	2.20789e-07	5.73538e-06	Trp53i11
ENSMUSG00000026853	1010.93	0.455499	0.0930888	2.26947e-07	5.88623e-06	Crat
ENSMUSG00000096472	6382.01	-0.552276	0.114209	2.29311e-07	5.93835e-06	Cdkn2d
ENSMUSG00000029064	14705	-0.36648	0.0736368	2.37947e-07	6.15247e-06	Gnb1
ENSMUSG00000033488	301.702	-1.03524	0.223229	2.39361e-07	6.17049e-06	Cryzl2
ENSMUSG00000057606	1996.9	-0.638224	0.133583	2.3938e-07	6.17049e-06	Colq
ENSMUSG00000026090	568.223	-1.23493	0.268859	2.48152e-07	6.38677e-06	2010300C02Rik
ENSMUSG00000037628	3163.67	-0.482991	0.0992187	2.51093e-07	6.45254e-06	Cdkn3
ENSMUSG00000056144	593.462	-0.690122	0.145419	2.5212e-07	6.46903e-06	Trim34a
ENSMUSG00000032657	1326.62	-0.566423	0.117559	2.53178e-07	6.48623e-06	Fam189b
ENSMUSG00000026672	225.553	-1.24878	0.271748	2.55948e-07	6.54719e-06	Optn
ENSMUSG00000050705	1024.29	0.414033	0.0842389	2.56744e-07	6.55754e-06	2310061I04Rik
ENSMUSG00000002055	7870.05	-0.315886	0.0640469	2.57565e-07	6.5685e-06	Spag5
ENSMUSG00000028460	1566.03	-0.741179	0.157365	2.5825e-07	6.57597e-06	Sit1
ENSMUSG00000052459	3685.95	-0.488479	0.100407	2.61013e-07	6.63623e-06	Atp6v1a
ENSMUSG00000024712	6792.95	-0.420613	0.0858474	2.65653e-07	6.74396e-06	Rfk
ENSMUSG00000023572	1740.59	-0.49224	0.101611	2.7138e-07	6.87892e-06	Ccndbp1
ENSMUSG00000026946	2449.86	-0.412176	0.0840296	2.72017e-07	6.88467e-06	Nmi
ENSMUSG00000021608	2847.31	-0.521139	0.108544	2.73863e-07	6.92092e-06	Lpcat1
ENSMUSG00000024220	975.542	0.64867	0.13649	2.76646e-07	6.98073e-06	Zfp523
ENSMUSG00000040430	809.548	0.791266	0.168917	2.77418e-07	6.98969e-06	Pitpnc1
ENSMUSG00000111713	66.561	1.18481	0.259947	2.79264e-07	7.02564e-06	Gm20234
ENSMUSG00000046598	1581.89	0.693859	0.146979	2.80402e-07	7.04368e-06	Bdh1
ENSMUSG00000034282	202.269	1.34107	0.296439	2.85714e-07	7.16636e-06	Evpl
ENSMUSG00000044700	2069.6	0.520538	0.108192	2.87411e-07	7.19815e-06	Tmem201
ENSMUSG00000024589	1725.05	-0.489325	0.101299	2.92141e-07	7.30571e-06	Nedd4l
ENSMUSG00000021185	1282.48	0.642035	0.135153	3.05306e-07	7.62354e-06	Dglucy
ENSMUSG00000043439	229.326	0.768858	0.164955	3.09523e-07	7.71735e-06	Epop
ENSMUSG00000024359	33032.4	0.437124	0.0901151	3.11464e-07	7.7542e-06	Hspa9
ENSMUSG00000025732	508.94	0.797696	0.171422	3.12311e-07	7.76376e-06	Mcrip2
ENSMUSG00000067586	181.283	1.27389	0.280066	3.16685e-07	7.86082e-06	S1pr3
ENSMUSG00000038175	827.046	-0.668461	0.142219	3.23431e-07	8.0164e-06	Mylip
ENSMUSG00000026405	51.3709	1.86803	0.423584	3.25036e-07	8.04428e-06	C4bp
ENSMUSG00000004032	143.887	0.828874	0.178668	3.26071e-07	8.05798e-06	Gstm5
ENSMUSG00000020918	5234.78	0.425021	0.087598	3.31372e-07	8.17692e-06	Kat2a
ENSMUSG00000032959	13666.7	0.37979	0.077643	3.3273e-07	8.19722e-06	Pebp1
ENSMUSG00000037683	132.375	-1.00024	0.218393	3.33173e-07	8.19722e-06	Armc3
ENSMUSG00000045362	814.113	-0.778214	0.167519	3.36243e-07	8.26062e-06	Tnfrsf26
ENSMUSG00000039158	4983.03	-0.646663	0.138957	3.41341e-07	8.3736e-06	Akna
ENSMUSG00000041890	8128.36	-0.35875	0.0729166	3.45688e-07	8.46783e-06	Git2
ENSMUSG00000061288	2589.18	-0.495947	0.103593	3.47167e-07	8.49166e-06	Taok3
ENSMUSG00000013698	558.911	-0.524495	0.110018	3.53676e-07	8.63826e-06	Pea15a
ENSMUSG00000019082	1727.57	0.355964	0.0726915	3.59252e-07	8.75523e-06	Slc25a22
ENSMUSG00000031840	285.077	-0.78773	0.170134	3.59511e-07	8.75523e-06	Rab3a
ENSMUSG00000024664	1208.95	0.701825	0.152126	3.6117e-07	8.78288e-06	Fads3
ENSMUSG00000015837	8696.75	-0.403998	0.0834111	3.63854e-07	8.83533e-06	Sqstm1
ENSMUSG00000026187	1684.6	-0.498069	0.104068	3.68703e-07	8.93426e-06	Xrcc5
ENSMUSG00000062309	34.4369	1.74257	0.388864	3.68995e-07	8.93426e-06	Rpp25
ENSMUSG00000038046	1413.64	0.431103	0.0893211	3.70219e-07	8.95096e-06	Mrm3
ENSMUSG00000044949	169.884	0.95231	0.208267	3.75638e-07	9.0689e-06	Ubtd2
ENSMUSG00000091337	1557.91	0.788305	0.170689	3.84664e-07	9.27344e-06	Eid1
ENSMUSG00000002083	87.5769	1.4901	0.33205	3.87605e-07	9.33092e-06	Bbc3
[truncated: 52,859 more rows]

## Sheet: Fig4a P1P2dKOvs sKO_allresults
EnsemblGeneID	baseMean	log2FoldChange	lfcSE	pvalue	padj	GeneName
[truncated: 53,555 more rows]

## Sheet: DESeq2normalisedReadCounts
EnsemblGeneID	FrB_Ctrl_F1_A8	FrB_Ctrl_F2_A14	FrB_Ctrl_F3_A26	FrB_Ctrl_M1_A20	FrB_Ctrl_M2_A32	FrB_sKO_F1_A12	FrB_sKO_F2_A18	FrB_sKO_F3_A38	FrB_sKO_M1_A24	FrB_sKO_M2_A40	FrB_dKO_F1_A10	FrB_dKO_F2_A16	FrB_dKO_F3_A28	FrB_dKO_M1_A22	FrB_dKO_M2_A34	Mean	GeneName
[truncated: 25,071 more rows]

[truncated: 4 more sheets: F4S2B P1sKO vs Ctrl bound 3UTR , F4S2B P1P2dKOvsCtrl bound3UTR , F4S2B P1P2dKOvsP1sKO bound3UTR , Sheet14]
