# Supplementary material for: Polypyrimidine tract-binding proteins are essential for B cell development
Source: eLife. 2020 Feb 21;9:e53557. doi: 10.7554/eLife.53557 (PMC7058386; doi:10.7554/eLife.53557)
Supplement: Figure 4—source data 2. — Different tabs show inclusion level differences (IncLevelDifference) shown in Figure 4B for the three pairwise comparisons carried out. The first three tabs show significant (FDR < 0.05) alternative splicing events with an absolute inclusion level difference >0.1. ‘allresults’ tabs show all the results from rMATS. ‘PTBP1 bound’ tabs show those significantly differential splicing events that were bound in their vicinity by PTBP1 clusters. [file elife-53557-fig4-data2.xls]

## Sheet: Fig4b P1sKO - Ctrl 
ID	GeneID	geneSymbol	chr	Strand	ID.1	IJC_SAMPLE_1	SJC_SAMPLE_1	IJC_SAMPLE_2	SJC_SAMPLE_2	IncFormLen	SkipFormLen	PValue	FDR	IncLevel1	IncLevel2	IncLevelDifference	EventType	EventID	sum.IJC_SAMPLE_1	sum.SJC_SAMPLE_1	sum.IJC_SAMPLE_2	sum.SJC_SAMPLE_2	sum.Sample_1	sum.Sample_2
1281	ENSMUSG00000022973	Synj1	chr16	-	1281	4,3,4,0,4	25,6,18,13,14	15,12,14,12,14	1,1,0,0,6	130	122	0	0	0.131,0.319,0.173,0.0,0.211	0.934,0.918,1.0,1.0,0.686	-0.741	A3SS	chr16:90973909:90974075:90973909:90974066:90976598:90976751	15	76	67	8	91	75
26301	ENSMUSG00000032366	Tpm1	chr9	-	26301	8,17,15,24,5	131111137114105	98,120,131,98,108	13,21,27,21,19	197	122	0	0	0.036,0.087,0.063,0.115,0.029	0.824,0.78,0.75,0.743,0.779	-0.709	SE	chr9:67032465:67032541:67031950:67032026:67032793:67032864	69	598	555	101	667	656
41023	ENSMUSG00000006498	Ptbp1	chr10	+	41023	79,49,79,59,77	87,57,80,102,75	14,17,26,16,23	0,0,0,0,0	152	122	0	0	0.422,0.408,0.442,0.317,0.452	1.0,1.0,1.0,1.0,1.0	-0.592	SE	chr10:79856503:79856534:79854426:79854721:79860823:79860969	343	401	96	0	744	96
10171	ENSMUSG00000021276	Cinp	chr12	-	10171	13,11,2,6,1	6,15,5,7,17	10,33,6,19,6	0,14,4,3,0	244	122	3.38742e-05	0.00120393	0.52,0.268,0.167,0.3,0.029	1.0,0.541,0.429,0.76,1.0	-0.489	SE	chr12:110877222:110877372:110876840:110876970:110878987:110879039	33	50	74	21	83	95
36869	ENSMUSG00000021843	Ktn1	chr14	+	36869	40,42,35,16,32	130,134,140,86,108	118,85,132,130,120	41,24,43,35,87	205	122	0	0	0.155,0.157,0.13,0.1,0.15	0.631,0.678,0.646,0.689,0.451	-0.481	SE	chr14:47726470:47726554:47726225:47726309:47730339:47730423	165	598	585	230	763	815
25547	ENSMUSG00000079563	Pglyrp2	chr17	-	25547	4,16,14,10,0	10,22,14,18,13	18,54,53,27,36	4,11,7,17,9	244	122	4.51572e-10	4.1859e-08	0.167,0.267,0.333,0.217,0.0	0.692,0.711,0.791,0.443,0.667	-0.464	SE	chr17:32415805:32416103:32413099:32413474:32416877:32417088	44	77	188	48	121	236
42296	ENSMUSG00000097589	Dleu2	chr14	-	42296	15,8,4,17,6	5,2,18,7,20	30,14,12,35,16	6,0,0,3,0	171	122	3.72299e-07	2.23458e-05	0.682,0.741,0.137,0.634,0.176	0.781,1.0,1.0,0.893,1.0	-0.461	SE	chr14:61624432:61624482:61603471:61603806:61625219:61625362	50	52	107	9	102	116
1327	ENSMUSG00000022562	Oplah	chr15	-	1327	12,7,13,11,29	7,10,6,7,6	6,13,26,13,15	0,0,3,1,0	244	122	9.39224e-10	1.10002e-07	0.462,0.259,0.52,0.44,0.707	1.0,1.0,0.813,0.867,1.0	-0.458	RI	chr15:76296602:76297018:76296602:76296781:76296920:76297018	72	36	73	4	108	77
1499	ENSMUSG00000085385	Snhg17	chr2	-	1499	4,5,19,8,1	9,2,4,2,2	15,26,21,8,19	0,0,3,1,0	244	122	3.60336e-08	3.01447e-06	0.182,0.556,0.704,0.667,0.2	1.0,1.0,0.778,0.8,1.0	-0.454	RI	chr2:158359181:158360599:158359181:158359432:158360458:158360599	37	19	89	4	56	93
2132	ENSMUSG00000031342	Gpm6b	chrX	+	2132	10,13,18,8,2	25,12,7,10,11	11,37,21,19,18	2,11,3,2,3	244	122	1.29714e-07	1.76903e-05	0.167,0.351,0.563,0.286,0.083	0.733,0.627,0.778,0.826,0.75	-0.453	A3SS	chrX:166385390:166388988:166386951:166388988:166383934:166384000	51	65	106	21	116	127
17098	ENSMUSG00000031342	Gpm6b	chrX	+	17098	12,14,19,8,8	25,12,7,10,11	15,39,22,20,28	2,11,3,2,3	212	122	3.08934e-08	2.27819e-06	0.216,0.402,0.61,0.315,0.295	0.812,0.671,0.808,0.852,0.843	-0.43	SE	chrX:166385390:166385481:166383934:166384000:166386951:166388988	61	65	124	21	126	145
34752	ENSMUSG00000086610	Gm15408	chr5	+	34752	2,4,20,9,35	4,6,0,4,1	13,9,5,6,18	0,0,0,0,0	244	122	3.27449e-08	2.39877e-06	0.2,0.25,1.0,0.529,0.946	1.0,1.0,1.0,1.0,1.0	-0.415	SE	chr5:149011573:149011707:149007885:149008015:149011998:149012776	70	15	51	0	85	51
37211	ENSMUSG00000026504	Sdccag8	chr1	+	37211	2,13,11,1,9	14,23,11,23,23	5,16,9,11,19	8,15,1,9,0	207	122	0.000191945	0.00536486	0.078,0.25,0.371,0.025,0.187	0.269,0.386,0.841,0.419,1.0	-0.401	SE	chr1:176826198:176826284:176814659:176815055:176831056:176831182	36	94	60	33	130	93
3107	ENSMUSG00000052337	Immt	chr6	+	3107	609629555564590	312370315363346	7.81796e+15	58,60,93,57,46	223	122	0	0	0.516,0.482,0.491,0.459,0.483	0.88,0.879,0.862,0.885,0.897	-0.394	SE	chr6:71852765:71852867:71851771:71851880:71856911:71856955	2947	1706	4169	314	4653	4483
20084	ENSMUSG00000029456	Acad10	chr5	-	20084	8,1,1,3,10	0,0,2,7,6	29,53,20,14,34	0,0,0,2,0	244	122	6.37042e-07	3.56978e-05	1.0,1.0,0.2,0.176,0.455	1.0,1.0,1.0,0.778,1.0	-0.389	SE	chr5:121639123:121639305:121637243:121637394:121642611:121642680	23	15	150	2	38	152
19967	ENSMUSG00000037536	Fbxo34	chr14	+	19967	8,1,12,11,7	9,2,5,4,0	20,20,26,14,4	8,0,0,0,0	244	122	0.000623049	0.0142472	0.308,0.2,0.545,0.579,1.0	0.556,1.0,1.0,1.0,1.0	-0.385	SE	chr14:47507264:47507446:47504985:47505132:47526204:47526236	39	20	84	8	59	92
40337	ENSMUSG00000006143	Upk3bl	chr5	+	40337	10,4,7,14,28	16,7,6,8,9	25,36,7,24,12	5,5,0,9,2	244	122	0.000250289	0.00669135	0.238,0.222,0.368,0.467,0.609	0.714,0.783,1.0,0.571,0.75	-0.383	SE	chr5:136060061:136060281:136059730:136059883:136061182:136061259	63	46	104	21	109	125
14534	ENSMUSG00000045519	Zfp560	chr9	-	14534	3,22,3,4,11	13,5,8,4,8	8,20,9,10,14	7,0,2,1,3	204	122	0.000642219	0.0146097	0.121,0.725,0.183,0.374,0.451	0.406,1.0,0.729,0.857,0.736	-0.375	SE	chr9:20349580:20349663:20345135:20349159:20350531:20350612	43	38	61	13	81	74
3142	ENSMUSG00000025558	Dock9	chr14	-	3142	36,11,24,5,7	4,13,20,12,16	21,19,12,23,16	7,2,2,4,2	190	122	0.00015166	0.00504046	0.852,0.352,0.435,0.211,0.219	0.658,0.859,0.794,0.787,0.837	-0.373	A3SS	chr14:121591811:121591948:121591811:121591879:121594335:121594383	83	65	91	17	148	108
2387	ENSMUSG00000038828	Tmem214	chr5	+	2387	14,9,18,29,7	11,10,14,9,12	27,10,39,20,23	5,1,6,2,7	244	122	7.98674e-06	0.000270801	0.389,0.31,0.391,0.617,0.226	0.73,0.833,0.765,0.833,0.622	-0.37	RI	chr5:30872686:30873144:30872686:30872904:30873042:30873144	77	56	119	21	133	140
3105	ENSMUSG00000052337	Immt	chr6	+	3105	766825749719750	312370315363346	1.02411e+17	58,60,93,57,46	244	122	0	0	0.551,0.527,0.543,0.498,0.52	0.898,0.901,0.88,0.897,0.91	-0.369	SE	chr6:71852729:71852867:71851771:71851880:71856911:71857048	3809	1706	5408	314	5515	5722
22300	ENSMUSG00000030695	Aldoa	chr7	-	22300	10,3,6,5,12	9,5,15,23,12	24,23,30,18,20	9,2,10,10,9	244	122	1.04987e-06	5.58344e-05	0.357,0.231,0.167,0.098,0.333	0.571,0.852,0.6,0.474,0.526	-0.367	SE	chr7:126797973:126798126:126797643:126797776:126800287:126800447	36	64	115	40	100	155
13055	ENSMUSG00000024663	Rab3il1	chr19	+	13055	35,29,52,46,46	21,15,21,18,26	38,69,52,56,67	2,7,6,3,4	244	122	2.10942e-15	3.33423e-13	0.455,0.492,0.553,0.561,0.469	0.905,0.831,0.813,0.903,0.893	-0.363	SE	chr19:10028284:10028503:10027559:10027637:10030149:10030278	208	101	282	22	309	304
45713	ENSMUSG00000037697	Ddhd1	chr14	-	45713	54,36,41,32,25	22,21,27,32,17	65,67,77,97,80	3,4,10,19,11	205	122	7.62723e-14	1.07306e-11	0.594,0.505,0.475,0.373,0.467	0.928,0.909,0.821,0.752,0.812	-0.362	SE	chr14:45599101:45599185:45588466:45595664:45601564:45601756	188	119	386	47	307	433
37621	ENSMUSG00000018501	Ncor1	chr11	-	37621	34,8,35,19,20	16,23,16,6,18	33,18,24,20,30	1,0,12,7,2	220	122	0.000144488	0.00421811	0.541,0.162,0.548,0.637,0.381	0.948,1.0,0.526,0.613,0.893	-0.342	SE	chr11:62349394:62349493:62345234:62345318:62351377:62351390	116	79	125	22	195	147
3106	ENSMUSG00000052337	Immt	chr6	+	3106	949902787838830	312370315363346	1.15712e+19	58,60,93,57,46	226	122	0	0	0.621,0.568,0.574,0.555,0.564	0.915,0.914,0.894,0.921,0.929	-0.338	SE	chr6:71852762:71852867:71851771:71851880:71856911:71857048	4306	1706	6142	314	6012	6456
21888	ENSMUSG00000024985	Tcf7l2	chr19	+	21888	3,2,10,6,5	8,10,11,5,17	16,15,3,12,14	3,12,3,5,3	194	122	0.000114798	0.00349538	0.191,0.112,0.364,0.43,0.156	0.77,0.44,0.386,0.601,0.746	-0.338	SE	chr19:55926683:55926756:55924529:55924580:55931433:55932209	26	51	60	26	77	86
17858	ENSMUSG00000037936	Scarb1	chr5	-	17858	797791594754700	182264228299229	8.32117e+18	46,33,24,44,34	244	122	0	0	0.686,0.6,0.566,0.558,0.604	0.9,0.947,0.962,0.931,0.942	-0.334	SE	chr5:125281104:125281233:125277086:125277865:125283898:125284045	3636	1202	5482	181	4838	5663
20580	ENSMUSG00000050891	Tatdn1	chr15	-	20580	9,6,5,4,6	19,14,21,15,16	9,28,23,14,15	1,33,10,34,8	162	122	0.000406167	0.0100169	0.263,0.244,0.152,0.167,0.22	0.871,0.39,0.634,0.237,0.585	-0.334	SE	chr15:58916151:58916192:58905740:58905811:58921139:58921182	30	85	89	86	115	175
12947	ENSMUSG00000037341	Slc9a7	chrX	-	12947	20,6,7,4,4	78,74,58,86,80	34,16,56,58,50	28,51,42,48,47	181	122	0	0	0.147,0.052,0.075,0.03,0.033	0.45,0.175,0.473,0.449,0.418	-0.326	SE	chrX:20138912:20138972:20131770:20131834:20158814:20158968	41	376	214	216	417	430
822	ENSMUSG00000025006	Sorbs1	chr19	-	822	17,12,21,26,20	7,14,8,26,28	50,53,50,33,20	4,4,4,3,13	151	122	3.78487e-07	2.26146e-05	0.662,0.409,0.68,0.447,0.366	0.91,0.915,0.91,0.899,0.554	-0.325	SE	chr19:40369689:40369719:40364993:40365166:40373475:40373617	96	83	206	28	179	234
4932	ENSMUSG00000026305	Lrrfip1	chr1	+	4932	78,55,69,103,99	19,47,44,77,76	8,12,8,17,29	2,3,0,3,0	181	122	4.26969e-07	2.51414e-05	0.735,0.441,0.514,0.474,0.468	0.729,0.729,1.0,0.793,1.0	-0.324	SE	chr1:91084945:91085005:91068562:91068649:91093559:91093637	404	263	74	8	667	82
21193	ENSMUSG00000086629	2810403D21Rik	chrX	+	21193	38,9,6,17,4	22,22,7,26,14	40,23,48,13,28	4,5,24,19,9	244	122	0.00048229	0.0114921	0.463,0.17,0.3,0.246,0.125	0.833,0.697,0.5,0.255,0.609	-0.318	SE	chrX:108871471:108871598:108836228:108836355:108886344:108886690	74	91	152	61	165	213
15780	ENSMUSG00000061755	Bod1l	chr5	-	15780	5,9,1,18,5	8,28,21,18,23	15,17,5,30,13	8,8,15,4,7	244	122	8.97514e-05	0.00281932	0.238,0.138,0.023,0.333,0.098	0.484,0.515,0.143,0.789,0.481	-0.316	SE	chr5:41791796:41791937:41787537:41788949:41794226:41794380	38	98	80	42	136	122
12249	ENSMUSG00000033526	Ppip5k1	chr2	-	12249	13,15,14,29,49	33,27,27,19,21	25,16,30,15,36	6,0,16,10,15	244	122	0.00183825	0.0355066	0.165,0.217,0.206,0.433,0.538	0.676,1.0,0.484,0.429,0.545	-0.315	SE	chr2:121332241:121332391:121331557:121331648:121334412:121334577	120	127	122	47	247	169
20461	ENSMUSG00000036825	Ssx2ip	chr3	+	20461	2,1,1,4,10	10,4,18,14,18	17,4,9,9,5	7,11,9,5,2	225	122	6.92237e-05	0.00226412	0.098,0.119,0.029,0.134,0.231	0.568,0.165,0.352,0.494,0.575	-0.309	SE	chr3:146414695:146414799:146404690:146404784:146417606:146417790	18	64	44	34	82	78
31855	ENSMUSG00000066043	Phactr4	chr4	-	31855	14,6,11,14,11	6,3,8,2,9	14,7,6,22,19	0,0,3,2,1	202	122	2.39242e-05	0.000892075	0.585,0.547,0.454,0.809,0.425	1.0,1.0,0.547,0.869,0.92	-0.303	SE	chr4:132383281:132383362:132378404:132378563:132386891:132387065	56	28	68	6	84	74
1929	ENSMUSG00000022199	Slc22a17	chr14	-	1929	9,3,8,13,13	32,26,25,29,27	11,6,33,13,0	3,8,5,6,7	244	122	0.00218556	0.0220667	0.123,0.055,0.138,0.183,0.194	0.647,0.273,0.767,0.52,0.0	-0.303	RI	chr14:54907518:54908366:54907518:54907630:54907885:54908366	46	139	63	29	185	92
29044	ENSMUSG00000020859	Spag9	chr11	+	29044	28,9,15,24,3	47,48,90,71,61	37,28,34,15,48	26,13,22,37,65	160	122	1.83012e-07	1.15987e-05	0.312,0.125,0.113,0.205,0.036	0.52,0.622,0.541,0.236,0.36	-0.298	SE	chr11:94113262:94113301:94112032:94112146:94114172:94114349	79	317	162	163	396	325
22280	ENSMUSG00000026068	Il18rap	chr1	+	22280	10,0,17,16,27	1,6,4,0,0	43,19,28,26,31	0,0,0,0,0	244	122	0.000231958	0.00630755	0.833,0.0,0.68,1.0,1.0	1.0,1.0,1.0,1.0,1.0	-0.297	SE	chr1:40531475:40531626:40525203:40525387:40537057:40537123	70	11	147	0	81	147
38360	ENSMUSG00000025162	Csnk1d	chr11	-	38360	273170225229229	289233363363318	348605535444496	152212266160208	184	122	0	0	0.385,0.326,0.291,0.295,0.323	0.603,0.654,0.571,0.648,0.613	-0.294	SE	chr11:120964947:120965010:120961748:120963906:120967994:120968134	1126	1566	2428	998	2692	3426
1793	ENSMUSG00000049643	2310022A10Rik	chr7	+	1793	199172206240181	67,73,101,87,74	154292206219171	11,12,20,17,30	244	122	0	0	0.598,0.541,0.505,0.58,0.55	0.875,0.924,0.837,0.866,0.74	-0.294	RI	chr7:27580336:27582099:27580336:27580691:27581350:27582099	998	402	1042	90	1400	1132
39960	ENSMUSG00000021870	Slmap	chr14	-	39960	26,23,33,18,7	12,12,8,6,18	41,9,37,41,31	4,0,4,5,11	172	122	0.000461116	0.0110875	0.606,0.576,0.745,0.68,0.216	0.879,1.0,0.868,0.853,0.667	-0.289	SE	chr14:26459903:26459954:26459409:26459460:26460041:26460185	107	56	159	24	163	183
2111	ENSMUSG00000059540	Tcea2	chr2	+	2111	5,11,14,27,25	6,4,6,19,10	25,24,43,26,19	1,0,18,7,4	244	122	0.00212664	0.021597	0.294,0.579,0.538,0.415,0.556	0.926,1.0,0.544,0.65,0.704	-0.288	RI	chr2:181686189:181686752:181686189:181686246:181686597:181686752	82	45	137	30	127	167
43432	ENSMUSG00000083161	Gm11427	chr11	+	43432	52,54,50,99,75	37,31,22,33,23	15,51,90,39,42	0,0,24,7,10	244	122	8.90258e-05	0.00279874	0.413,0.466,0.532,0.6,0.62	1.0,1.0,0.652,0.736,0.677	-0.287	SE	chr11:83241534:83241751:83225533:83225685:83243817:83243996	330	146	237	41	476	278
2393	ENSMUSG00000020184	Mdm2	chr10	-	2393	33,5,11,8,24	0,9,2,3,10	21,21,36,16,10	1,0,0,6,0	244	122	0.000986943	0.011795	1.0,0.217,0.733,0.571,0.545	0.913,1.0,1.0,0.571,1.0	-0.284	RI	chr10:117694904:117696439:117694904:117695068:117696380:117696439	81	24	104	7	105	111
15665	ENSMUSG00000026767	Mindy3	chr2	-	15665	25,30,40,23,33	21,23,23,22,17	64,72,41,62,65	13,17,15,12,6	201	122	4.82773e-08	3.41418e-06	0.419,0.442,0.514,0.388,0.541	0.749,0.72,0.624,0.758,0.868	-0.283	SE	chr2:12410000:12410080:12386608:12386679:12419158:12419410	151	106	304	63	257	367
4028	ENSMUSG00000033439	Trmt13	chr3	-	4028	61,57,48,35,24	11,28,32,30,11	80,132,103,75,83	15,19,20,3,10	244	122	1.94829e-06	0.000176984	0.735,0.504,0.429,0.368,0.522	0.727,0.776,0.72,0.926,0.806	-0.279	A3SS	chr3:116582493:116582883:116582493:116582724:116585195:116585270	225	112	473	67	337	540
15516	ENSMUSG00000023008	Fmnl3	chr15	-	15516	25,22,11,14,25	58,63,76,90,88	56,77,121,70,101	75,39,69,54,99	244	122	0	0	0.177,0.149,0.067,0.072,0.124	0.272,0.497,0.467,0.393,0.338	-0.276	SE	chr15:99329279:99329432:99328057:99328166:99331986:99332070	97	375	425	336	472	761
8190	ENSMUSG00000087174	5530601H04Rik	chrX	-	8190	59,40,49,31,35	15,41,20,44,19	55,62,62,53,60	18,32,4,3,10	244	122	0.000525231	0.0123375	0.663,0.328,0.551,0.261,0.479	0.604,0.492,0.886,0.898,0.75	-0.27	SE	chrX:105042603:105042817:105038816:105039812:105043129:105043304	214	139	292	67	353	359
7659	ENSMUSG00000030498	Gas2	chr7	+	7659	29,19,30,37,14	20,7,9,17,7	26,9,26,14,20	1,1,6,3,1	217	122	3.33383e-05	0.00118945	0.449,0.604,0.652,0.55,0.529	0.936,0.835,0.709,0.724,0.918	-0.268	SE	chr7:51863997:51864093:51862014:51862444:51864281:51864369	129	60	95	12	189	107
8074	ENSMUSG00000054426	A930005H10Rik	chr3	-	8074	110,85,42,106,94	138,95,106,152,178	286313300295285	103191156118149	244	122	0	0	0.285,0.309,0.165,0.259,0.209	0.581,0.45,0.49,0.556,0.489	-0.268	SE	chr3:115886213:115886375:115881580:115881838:115887775:115888094	437	669	1479	717	1106	2196
1824	ENSMUSG00000020657	Dnajc27	chr12	+	1824	22,3,32,24,24	0,11,2,0,6	31,29,14,12,44	0,0,0,0,0	244	122	4.78463e-06	0.000217441	1.0,0.12,0.889,1.0,0.667	1.0,1.0,1.0,1.0,1.0	-0.265	SE	chr12:4107158:4107348:4106801:4107043:4107549:4109204	105	19	130	0	124	130
28150	ENSMUSG00000040363	Bcor	chrX	-	28150	52,52,50,58,41	44,24,66,49,45	79,26,67,58,95	8,12,17,17,35	175	122	2.78757e-07	1.7173e-05	0.452,0.602,0.346,0.452,0.388	0.873,0.602,0.733,0.704,0.654	-0.265	SE	chrX:12055638:12055692:12054968:12055155:12056343:12059190	253	228	325	89	481	414
17910	ENSMUSG00000021624	Cd180	chr13	+	17910	19,24,42,48,14	6,11,5,11,9	12,26,22,37,51	4,0,0,1,5	244	122	6.34753e-05	0.0021021	0.613,0.522,0.808,0.686,0.438	0.6,1.0,1.0,0.949,0.836	-0.264	SE	chr13:102702700:102702867:102693557:102693789:102739165:102739629	147	42	148	10	189	158
20147	ENSMUSG00000004947	Dtx2	chr5	+	20147	77,72,69,82,104	47,67,48,59,61	62,110,123,93,100	34,23,18,23,14	244	122	7.4649e-08	5.09746e-06	0.45,0.35,0.418,0.41,0.46	0.477,0.705,0.774,0.669,0.781	-0.264	SE	chr5:136026469:136026607:136021754:136021858:136028498:136028572	404	282	488	112	686	600
419	ENSMUSG00000005506	Celf1	chr2	+	419	69,49,84,84,82	84,65,98,80,89	48,89,72,82,68	24,32,34,16,30	244	122	1.40941e-10	2.06337e-08	0.291,0.274,0.3,0.344,0.315	0.5,0.582,0.514,0.719,0.531	-0.264	RI	chr2:91013237:91019497:91013237:91013402:91016565:91019497	368	416	359	136	784	495
30224	ENSMUSG00000085936	2610307P16Rik	chr13	-	30224	17,16,26,38,17	17,25,11,14,32	37,46,62,49,49	5,12,5,31,30	213	122	0.00231682	0.042812	0.364,0.268,0.575,0.609,0.233	0.809,0.687,0.877,0.475,0.483	-0.256	SE	chr13:28711116:28711208:28668369:28668704:28772618:28772666	114	99	243	83	213	326
30756	ENSMUSG00000050530	Fam171a1	chr2	+	30756	16,5,38,16,12	2,2,4,6,1	19,12,30,8,20	0,0,0,0,1	236	122	4.53077e-08	3.23298e-06	0.805,0.564,0.831,0.58,0.861	1.0,1.0,1.0,1.0,0.912	-0.254	SE	chr2:3223469:3223584:3220252:3220369:3224817:3227250	87	15	89	1	102	90
19801	ENSMUSG00000019088	Dnase1l1	chrX	-	19801	33,9,20,38,11	11,8,11,21,8	26,49,26,44,46	8,18,0,6,12	210	122	0.00220314	0.0410941	0.635,0.395,0.514,0.512,0.444	0.654,0.613,1.0,0.81,0.69	-0.253	SE	chrX:74276645:74276734:74274367:74274468:74277038:74277342	111	59	191	44	170	235
25174	ENSMUSG00000083012	Fam220a	chr5	+	25174	10,7,5,10,9	23,28,34,30,30	18,28,29,24,27	23,38,21,18,14	244	122	5.99968e-09	4.82822e-07	0.179,0.111,0.068,0.143,0.13	0.281,0.269,0.408,0.4,0.491	-0.244	SE	chr5:143551408:143551541:143548705:143549134:143562756:143564525	41	145	126	114	186	240
3942	ENSMUSG00000044250	Pced1b	chr15	+	3942	9,8,6,16,12	10,12,11,23,28	16,15,9,16,17	8,11,5,7,9	244	122	3.89551e-05	0.00136649	0.31,0.25,0.214,0.258,0.176	0.5,0.405,0.474,0.533,0.486	-0.238	SE	chr15:97373955:97374149:97361199:97361335:97384027:97385676	51	84	73	40	135	113
19548	ENSMUSG00000029177	Cenpa	chr5	+	19548	5,5,9,3,3	31,15,11,18,12	10,20,18,16,19	13,14,23,12,19	175	122	1.4216e-05	0.000565702	0.101,0.189,0.363,0.104,0.148	0.349,0.499,0.353,0.482,0.411	-0.238	SE	chr5:30668998:30669052:30666911:30667113:30669737:30669828	25	87	83	81	112	164
2128	ENSMUSG00000022724	Riox2	chr16	+	2128	9,0,2,1,4	24,16,21,20,15	6,14,0,12,6	8,10,10,11,6	198	122	0.000113281	0.00346202	0.188,0.0,0.055,0.03,0.141	0.316,0.463,0.0,0.402,0.381	-0.23	SE	chr16:59489489:59489566:59487427:59487599:59491204:59491668	16	96	38	45	112	83
9805	ENSMUSG00000087107	AI662270	chr11	+	9805	48,50,55,40,27	25,22,10,21,11	62,56,57,47,56	2,17,8,2,11	222	122	8.41023e-05	0.0026675	0.513,0.555,0.751,0.511,0.574	0.945,0.644,0.797,0.928,0.737	-0.229	SE	chr11:83224209:83224310:83223575:83223651:83225533:83226604	220	89	278	40	309	318
11005	ENSMUSG00000000538	Tom1l2	chr11	-	11005	29,8,30,15,12	8,3,5,3,8	24,20,28,16,18	1,0,11,0,0	181	122	0.00164643	0.0324331	0.71,0.643,0.802,0.771,0.503	0.942,1.0,0.632,1.0,1.0	-0.229	SE	chr11:60232897:60232957:60231100:60231137:60241817:60241893	94	27	106	12	121	118
30501	ENSMUSG00000026958	Dpp7	chr2	-	30501	30,46,25,48,43	28,20,10,13,24	70,43,99,72,80	18,11,10,7,16	240	122	3.06403e-05	0.00110712	0.353,0.539,0.56,0.652,0.477	0.664,0.665,0.834,0.839,0.718	-0.228	SE	chr2:25353607:25353726:25353359:25353516:25354232:25354293	192	95	364	62	287	426
3089	ENSMUSG00000039246	Lyplal1	chr1	-	3089	15,10,15,5,13	4,10,0,1,1	38,48,58,28,58	0,3,0,2,2	244	122	0.000224751	0.00615375	0.652,0.333,1.0,0.714,0.867	1.0,0.889,1.0,0.875,0.935	-0.227	SE	chr1:186100192:186100362:186089443:186089559:186114263:186114363	58	16	230	7	74	237
13554	ENSMUSG00000042213	Zfand4	chr6	+	13554	40,27,23,46,31	23,26,15,39,19	46,40,37,46,62	7,16,6,21,21	244	122	0.000121701	0.00366061	0.465,0.342,0.434,0.371,0.449	0.767,0.556,0.755,0.523,0.596	-0.227	SE	chr6:116287981:116288168:116273578:116273872:116305616:116305761	167	122	231	71	289	302
14443	ENSMUSG00000023764	Sfi1	chr11	-	14443	16,43,17,23,22	0,11,2,14,13	30,42,36,28,21	0,2,1,5,1	244	122	0.000184458	0.00518285	1.0,0.662,0.81,0.451,0.458	1.0,0.913,0.947,0.737,0.913	-0.226	SE	chr11:3135282:3135542:3133071:3133207:3135653:3135830	121	40	157	9	161	166
37620	ENSMUSG00000018501	Ncor1	chr11	-	37620	81,32,82,50,62	16,23,16,6,18	83,44,65,45,69	1,0,12,7,2	244	122	3.21846e-05	0.00115765	0.717,0.41,0.719,0.806,0.633	0.976,1.0,0.73,0.763,0.945	-0.226	SE	chr11:62349352:62349493:62345234:62345318:62351377:62351546	307	79	306	22	386	328
34131	ENSMUSG00000031255	Sytl4	chrX	-	34131	28,11,6,3,20	23,17,23,33,32	18,22,32,18,43	23,13,28,16,11	230	122	0.000456981	0.0110266	0.392,0.256,0.122,0.046,0.249	0.293,0.473,0.377,0.374,0.675	-0.225	SE	chrX:133943559:133943668:133936384:133938050:133947736:133947898	68	128	133	91	196	224
28950	ENSMUSG00000097755	2010110K18Rik	chr18	+	28950	12,17,16,13,18	6,7,0,2,6	4,29,25,11,8	0,3,0,0,1	207	122	4.51482e-06	0.000207391	0.541,0.589,1.0,0.793,0.639	1.0,0.851,1.0,1.0,0.825	-0.223	SE	chr18:34754483:34754569:34751808:34752135:34758231:34758685	76	21	77	4	97	81
21491	ENSMUSG00000039089	L3mbtl3	chr10	-	21491	43,26,35,26,18	7,3,18,16,10	39,43,56,17,52	2,0,4,10,1	196	122	0.000157322	0.00454182	0.793,0.844,0.548,0.503,0.528	0.924,1.0,0.897,0.514,0.97	-0.218	SE	chr10:26344176:26344251:26342507:26342667:26344611:26344723	148	54	207	17	202	224
35518	ENSMUSG00000019978	Epb41l2	chr10	+	35518	207140217173230	29,44,41,35,24	190166298143248	9,4,5,3,6	244	122	0	0	0.781,0.614,0.726,0.712,0.827	0.913,0.954,0.968,0.96,0.954	-0.218	SE	chr10:25501823:25502138:25488950:25489093:25506174:25506273	967	173	1045	27	1140	1072
1787	ENSMUSG00000097145	9230114K14Rik	chr5	+	1787	17,15,10,20,33	1,3,6,2,3	15,18,13,17,10	0,0,0,0,1	244	122	5.71378e-08	5.6257e-06	0.895,0.714,0.455,0.833,0.846	1.0,1.0,1.0,1.0,0.833	-0.218	A5SS	chr5:52192917:52193596:52192917:52192978:52194397:52194507	95	15	73	1	110	74
1984	ENSMUSG00000025484	Bet1l	chr7	-	1984	20,19,21,33,16	5,3,3,0,5	29,14,18,19,29	0,0,1,0,0	244	122	4.50764e-08	3.56713e-06	0.667,0.76,0.778,1.0,0.615	1.0,1.0,0.9,1.0,1.0	-0.216	RI	chr7:140854764:140855165:140854764:140854937:140855073:140855165	109	16	109	1	125	110
19799	ENSMUSG00000019088	Dnase1l1	chrX	-	19799	33,21,26,27,19	11,8,11,21,8	34,80,30,52,40	8,18,0,6,12	199	122	0.000780851	0.0172684	0.648,0.617,0.592,0.441,0.593	0.723,0.732,1.0,0.842,0.671	-0.215	SE	chrX:74276478:74276556:74274367:74274468:74277038:74277342	126	59	236	44	185	280
36157	ENSMUSG00000062861	Zfp28	chr7	+	36157	2,1,3,7,0	10,17,22,23,25	2,15,16,11,7	17,7,9,22,21	241	122	2.50048e-05	0.000929749	0.092,0.029,0.065,0.134,0.0	0.056,0.52,0.474,0.202,0.144	-0.215	SE	chr7:6392593:6392713:6392181:6392296:6393366:6393589	13	97	51	76	110	127
1791	ENSMUSG00000023764	Sfi1	chr11	-	1791	21,42,21,24,26	0,11,2,14,13	35,46,37,29,23	0,2,1,5,1	244	122	0.00017171	0.00547673	1.0,0.656,0.84,0.462,0.5	1.0,0.92,0.949,0.744,0.92	-0.215	A3SS	chr11:3133071:3135542:3133071:3133207:3135653:3135830	134	40	170	9	174	179
40661	ENSMUSG00000027506	Tpd52	chr3	-	40661	97,177,104,95,74	50,64,46,59,44	23,16,7,5,16	0,5,7,0,0	148	122	0.000929463	0.020041	0.615,0.695,0.651,0.57,0.581	1.0,0.725,0.452,1.0,1.0	-0.213	SE	chr3:8943550:8943577:8936438:8936480:8944610:8944712	547	263	67	12	810	79
42039	ENSMUSG00000027806	Tsc22d2	chr3	+	42039	0,0,7,3,0	9,15,12,20,16	4,5,11,0,5	9,11,2,8,7	244	122	0.00267531	0.0480272	0.0,0.0,0.226,0.07,0.0	0.182,0.185,0.733,0.0,0.263	-0.213	SE	chr3:58437316:58437475:58428227:58428299:58459330:58459382	10	72	25	37	82	62
34957	ENSMUSG00000032624	Eml4	chr17	+	34957	219,96,126,137,131	123,70,115,84,73	144,99,229,144,241	42,40,35,35,54	154	122	4.47598e-12	5.25384e-10	0.585,0.521,0.465,0.564,0.587	0.731,0.662,0.838,0.765,0.78	-0.211	SE	chr17:83428215:83428248:83427999:83428025:83440030:83440154	709	465	857	206	1174	1063
44392	ENSMUSG00000107283	Mpv17	chr5	-	44392	73,51,47,59,44	17,17,18,10,9	54,82,69,58,60	9,11,2,1,3	244	122	5.57586e-06	0.000247723	0.682,0.6,0.566,0.747,0.71	0.75,0.788,0.945,0.967,0.909	-0.211	SE	chr5:31144893:31145278:31144073:31144752:31145494:31145590	274	71	323	26	345	349
1409	ENSMUSG00000033460	Armcx1	chrX	+	1409	9,10,11,30,24	6,1,2,8,0	40,26,25,23,32	0,1,0,0,3	214	122	3.9312e-06	0.00018354	0.461,0.851,0.758,0.681,1.0	1.0,0.937,1.0,1.0,0.859	-0.209	SE	chrX:134718725:134718818:134718369:134718461:134718919:134718992	84	17	146	4	101	150
37209	ENSMUSG00000026504	Sdccag8	chr1	+	37209	73,68,86,76,92	14,23,11,23,23	85,108,107,95,105	8,15,1,9,0	244	122	1.01451e-07	6.76468e-06	0.723,0.596,0.796,0.623,0.667	0.842,0.783,0.982,0.841,1.0	-0.209	SE	chr1:176824751:176824904:176814659:176815055:176831056:176831182	395	94	500	33	489	533
8796	ENSMUSG00000094942	Gm3604	chr13	-	8796	40,41,33,50,56	68,32,46,37,67	50,27,40,57,78	10,23,39,23,22	182	122	0.000951876	0.0204134	0.283,0.462,0.325,0.475,0.359	0.77,0.44,0.407,0.624,0.704	-0.208	SE	chr13:62371562:62371623:62368327:62370351:62371809:62371936	220	250	252	117	470	369
20835	ENSMUSG00000094936	Rbm4	chr19	-	20835	406319398358490	243257228271230	385609609671613	151165145111188	244	122	4.31377e-12	5.10879e-10	0.455,0.383,0.466,0.398,0.516	0.56,0.649,0.677,0.751,0.62	-0.208	SE	chr19:4787360:4788042:4784292:4785567:4792397:4792820	1971	1229	2887	760	3200	3647
42514	ENSMUSG00000043384	Gprasp1	chrX	+	42514	17,9,25,18,28	26,34,22,31,28	22,34,23,46,27	14,10,19,28,22	202	122	0.000521463	0.0122904	0.283,0.138,0.407,0.26,0.377	0.487,0.673,0.422,0.498,0.426	-0.208	SE	chrX:135743441:135743522:135742732:135742978:135744498:135744575	97	141	152	93	238	245
4029	ENSMUSG00000033439	Trmt13	chr3	-	4029	132,94,99,78,56	11,28,32,30,11	178281194142162	15,19,20,3,10	244	122	4.46004e-08	6.53313e-06	0.857,0.627,0.607,0.565,0.718	0.856,0.881,0.829,0.959,0.89	-0.208	A3SS	chr3:116582493:116582923:116582493:116582724:116585195:116585270	459	112	957	67	571	1024
46089	ENSMUSG00000036712	Cyld	chr8	+	46089	30,11,41,36,23	17,7,16,10,15	15,33,31,25,50	3,12,6,6,3	244	122	0.0025641	0.0465149	0.469,0.44,0.562,0.643,0.434	0.714,0.579,0.721,0.676,0.893	-0.207	SE	chr8:88702304:88702438:88697046:88697099:88705225:88705879	141	65	154	30	206	184
442	ENSMUSG00000029267	Mtf2	chr5	+	442	54,54,52,42,35	10,12,4,24,4	58,65,70,51,41	2,5,0,0,5	244	122	2.25067e-06	0.000136368	0.73,0.692,0.867,0.467,0.814	0.935,0.867,1.0,1.0,0.804	-0.207	A5SS	chr5:108069161:108069523:108069161:108069363:108078865:108078974	237	54	285	12	291	297
12353	ENSMUSG00000037369	Kdm6a	chrX	+	12353	58,73,59,43,30	32,14,28,10,8	80,24,55,34,75	14,3,8,4,2	244	122	4.93049e-05	0.00169361	0.475,0.723,0.513,0.683,0.652	0.741,0.8,0.775,0.81,0.949	-0.206	SE	chrX:18247566:18247722:18246196:18246416:18248269:18248359	263	92	268	31	355	299
7100	ENSMUSG00000034833	Tespa1	chr10	+	7100	251200154202210	72,61,70,61,73	278309302356277	34,51,30,35,38	244	122	2.22045e-16	3.78086e-14	0.635,0.621,0.524,0.623,0.59	0.803,0.752,0.834,0.836,0.785	-0.203	SE	chr10:130330981:130331153:130322876:130322969:130347143:130347203	1017	337	1522	188	1354	1710
11521	ENSMUSG00000020516	Rps6kb1	chr11	-	11521	24,17,14,16,18	2,22,0,2,0	12,27,13,13,21	0,0,0,0,0	220	122	5.06376e-06	0.000228555	0.869,0.3,1.0,0.816,1.0	1.0,1.0,1.0,1.0,1.0	-0.203	SE	chr11:86517150:86517249:86516743:86516987:86517349:86517392	89	26	86	0	115	86
38180	ENSMUSG00000038215	Cep44	chr8	-	38180	27,26,8,15,4	60,43,40,48,62	39,38,46,44,37	26,72,64,64,29	180	122	9.15992e-06	0.000385786	0.234,0.291,0.119,0.175,0.042	0.504,0.263,0.328,0.318,0.464	-0.203	SE	chr8:56550062:56550121:56547387:56547524:56550544:56551047	80	253	204	255	333	459
24025	ENSMUSG00000031137	Fgf13	chrX	-	24025	51,48,55,51,48	9,15,14,14,16	48,73,56,49,80	0,0,12,6,12	244	122	8.20517e-05	0.00261892	0.739,0.615,0.663,0.646,0.6	1.0,1.0,0.7,0.803,0.769	-0.202	SE	chrX:59250798:59250966:59131876:59131950:59567139:59567472	253	68	306	30	321	336
12170	ENSMUSG00000028175	Depdc1a	chr3	+	12170	333324284351328	172182191162156	524391397486426	120,77,72,122,132	244	122	0	0	0.492,0.471,0.426,0.52,0.512	0.686,0.717,0.734,0.666,0.617	-0.2	SE	chr3:159522525:159523356:159520829:159520970:159523776:159523949	1620	863	2224	523	2483	2747
7716	ENSMUSG00000033287	Kctd17	chr15	+	7716	5,15,26,18,20	3,7,2,0,0	9,14,16,19,34	0,0,0,0,2	215	122	8.70461e-05	0.00274302	0.486,0.549,0.881,1.0,1.0	1.0,1.0,1.0,1.0,0.906	-0.198	SE	chr15:78436900:78436994:78435584:78435710:78437157:78437579	84	12	92	2	96	94
20102	ENSMUSG00000000326	Comt	chr16	-	20102	110,93,115,79,84	23,37,48,37,26	141181182156168	14,14,27,28,12	178	122	5.2627e-11	5.4373e-09	0.766,0.633,0.622,0.594,0.689	0.873,0.899,0.822,0.792,0.906	-0.198	SE	chr16:18424303:18424360:18411689:18411957:18426355:18426604	481	171	828	95	652	923
27098	ENSMUSG00000008435	Rdh13	chr7	-	27098	9,12,13,23,34	7,2,4,2,4	5,10,11,11,13	1,0,0,2,0	226	122	8.41302e-06	0.000358516	0.41,0.764,0.637,0.861,0.821	0.73,1.0,1.0,0.748,1.0	-0.197	SE	chr7:4434993:4435098:4431421:4431634:4442593:4442749	91	19	50	3	110	53
6493	ENSMUSG00000036817	Sun1	chr5	+	6493	86,118,121,99,109	23,21,20,35,12	123136158136123	10,6,6,7,6	244	122	3.00026e-10	2.84087e-08	0.652,0.738,0.752,0.586,0.82	0.86,0.919,0.929,0.907,0.911	-0.196	SE	chr5:139229752:139229944:139226705:139226885:139230772:139230838	533	111	676	35	644	711
585	ENSMUSG00000005506	Celf1	chr2	+	585	352150282337317	84,65,98,80,89	264240299253187	24,32,34,16,30	244	122	2.58116e-12	7.29177e-10	0.677,0.536,0.59,0.678,0.64	0.846,0.789,0.815,0.888,0.757	-0.195	A3SS	chr2:91013490:91019490:91016565:91019490:91013237:91013402	1438	416	1243	136	1854	1379
16109	ENSMUSG00000028073	Pear1	chr3	-	16109	7,20,16,14,25	2,2,3,4,8	16,14,17,15,24	1,0,0,1,5	220	122	0.00197083	0.0375376	0.66,0.847,0.747,0.66,0.634	0.899,1.0,1.0,0.893,0.727	-0.194	SE	chr3:87763259:87763358:87762211:87762281:87768877:87768935	82	19	86	7	101	93
39491	ENSMUSG00000030279	C2cd5	chr6	-	39491	66,59,51,64,46	110,98,155,118,145	121,63,94,84,99	77,84,100,68,76	172	122	2.80897e-09	2.37113e-07	0.299,0.299,0.189,0.278,0.184	0.527,0.347,0.4,0.467,0.48	-0.194	SE	chr6:143020323:143020374:143017882:143018073:143029159:143029246	286	626	461	405	912	866
5390	ENSMUSG00000038866	Zcchc2	chr1	+	5390	63,53,99,76,65	32,12,21,28,17	77,55,54,58,99	3,7,13,4,6	205	122	1.98502e-06	9.96882e-05	0.54,0.724,0.737,0.618,0.695	0.939,0.824,0.712,0.896,0.908	-0.193	SE	chr1:106018218:106018302:106015998:106016093:106019847:106019905	356	110	343	33	466	376
23216	ENSMUSG00000033488	Cryzl2	chr1	+	23216	18,23,55,27,37	2,12,1,4,0	42,67,58,48,67	0,0,0,0,0	244	122	2.29982e-08	1.70867e-06	0.818,0.489,0.965,0.771,1.0	1.0,1.0,1.0,1.0,1.0	-0.191	SE	chr1:157472187:157472416:157465711:157465821:157488442:157489060	160	19	282	0	179	282
38700	ENSMUSG00000030172	Erc1	chr6	-	38700	25,9,19,11,17	4,1,8,6,1	28,13,23,27,16	2,0,0,0,4	205	122	0.000176018	0.00498099	0.788,0.843,0.586,0.522,0.91	0.893,1.0,1.0,1.0,0.704	-0.19	SE	chr6:119777987:119778071:119773733:119773901:119779476:119779632	81	20	107	6	101	113
14050	ENSMUSG00000019813	Cep57l1	chr10	-	14050	101,129,103,92,79	109,105,93,110,132	87243140149128	44,95,91,66,72	208	122	3.71862e-09	3.09942e-07	0.352,0.419,0.394,0.329,0.26	0.537,0.6,0.474,0.57,0.51	-0.187	SE	chr10:41728627:41728714:41723860:41723938:41729330:41729408	504	549	747	368	1053	1115
15270	ENSMUSG00000071454	Dtnb	chr12	+	15270	87,86,104,102,152	24,25,39,32,24	199229244199287	10,36,18,28,16	211	122	1.07493e-09	9.54063e-08	0.677,0.665,0.607,0.648,0.785	0.92,0.786,0.887,0.804,0.912	-0.185	SE	chr12:3732617:3732707:3718411:3718489:3734938:3735026	531	144	1158	108	675	1266
28454	ENSMUSG00000042997	Nhlrc3	chr3	-	28454	11,14,21,16,18	0,2,2,9,6	20,25,67,37,40	1,1,3,3,0	244	122	0.000386222	0.00963102	1.0,0.778,0.84,0.471,0.6	0.909,0.926,0.918,0.86,1.0	-0.185	SE	chr3:53461631:53461779:53458484:53458685:53462311:53462464	80	19	189	8	99	197
38785	ENSMUSG00000085399	Foxd2os	chr4	+	38785	122164176236178	152,115,96,161,150	151219153170202	76,60,55,69,63	237	122	9.98104e-08	6.6777e-06	0.292,0.423,0.486,0.43,0.379	0.506,0.653,0.589,0.559,0.623	-0.184	SE	chr4:114920439:114920555:114916188:114916310:114921768:114921967	876	674	895	323	1550	1218
13579	ENSMUSG00000020696	Rffl	chr11	-	13579	40,31,51,21,30	10,8,11,10,21	70,92,45,58,48	3,7,18,3,11	205	122	0.0016932	0.0332226	0.704,0.698,0.734,0.556,0.46	0.933,0.887,0.598,0.92,0.722	-0.182	SE	chr11:82811027:82811111:82810007:82810218:82812399:82812810	173	60	313	42	233	355
17851	ENSMUSG00000004319	Clcn3	chr8	-	17851	37,9,19,35,19	61,41,42,42,46	40,38,64,47,34	40,31,47,31,49	197	122	4.08846e-05	0.00142912	0.273,0.12,0.219,0.34,0.204	0.382,0.432,0.457,0.484,0.301	-0.18	SE	chr8:60914752:60914828:60911895:60913175:60919339:60919556	119	232	223	198	351	421
701	ENSMUSG00000028102	Pex11b	chr3	+	701	739722579784637	97131106128120	7.05109e+16	32,55,37,23,40	244	122	0	0	0.792,0.734,0.732,0.754,0.726	0.917,0.908,0.926,0.956,0.922	-0.178	RI	chr3:96643574:96644726:96643574:96644015:96644435:96644726	3461	582	4669	187	4043	4856
25315	ENSMUSG00000025656	Arhgef9	chrX	-	25315	4,18,17,19,11	0,2,5,3,9	38,57,21,14,32	1,1,0,3,0	183	122	2.62929e-06	0.000127058	1.0,0.857,0.694,0.809,0.449	0.962,0.974,1.0,0.757,1.0	-0.177	SE	chrX:95054228:95054290:95051523:95052154:95054942:95055011	69	19	162	5	88	167
806	ENSMUSG00000015377	Dennd6b	chr15	-	806	26,22,27,28,45	27,38,40,22,42	29,41,33,28,39	15,13,18,18,29	244	122	0.000455335	0.00682684	0.325,0.224,0.252,0.389,0.349	0.492,0.612,0.478,0.438,0.402	-0.177	RI	chr15:89186362:89186819:89186362:89186427:89186753:89186819	148	169	170	93	317	263
12568	ENSMUSG00000020647	Ncoa1	chr12	-	12568	36,21,32,18,33	15,8,14,9,11	25,34,38,31,34	4,3,4,4,15	176	122	0.00218492	0.0409083	0.625,0.645,0.613,0.581,0.675	0.812,0.887,0.868,0.843,0.611	-0.176	SE	chr12:4249835:4249890:4247361:4249750:4253656:4253746	140	57	162	30	197	192
34940	ENSMUSG00000032294	Pkm	chr9	+	34940	3.25542e+19	479765613707577	3.49066e+19	109261248231182	244	122	0	0	0.773,0.734,0.739,0.755,0.758	0.941,0.927,0.922,0.921,0.927	-0.176	SE	chr9:59675567:59675734:59675028:59675195:59678043:59678225	18911	3141	25981	1031	22052	27012
38691	ENSMUSG00000012519	Mlkl	chr8	-	38691	37,99,60,64,59	19,17,10,10,1	143204203231265	0,5,7,2,7	171	122	1.35969e-12	1.71797e-10	0.581,0.806,0.811,0.82,0.977	1.0,0.967,0.954,0.988,0.964	-0.176	SE	chr8:111315492:111315542:111314940:111315105:111316362:111316514	319	57	1046	21	376	1067
47032	ENSMUSG00000074513	Arfip1	chr3	-	47032	13,27,19,33,44	55,36,28,42,62	42,28,39,34,60	33,17,41,25,41	196	122	6.96464e-05	0.00227607	0.128,0.318,0.297,0.328,0.306	0.442,0.506,0.372,0.458,0.477	-0.176	SE	chr3:84529190:84529265:84527685:84527798:84534586:84534695	136	223	203	157	359	360
4724	ENSMUSG00000020271	Fbxw11	chr11	+	4724	65,35,80,78,55	18,1,3,26,32	42,80,97,80,75	0,7,16,0,0	184	122	0.000187295	0.00525142	0.705,0.959,0.946,0.665,0.533	1.0,0.883,0.801,1.0,1.0	-0.175	SE	chr11:32708187:32708250:32652747:32652904:32711771:32711997	313	80	374	23	393	397
4999	ENSMUSG00000033728	Lrrc14	chr15	+	4999	44,37,35,32,19	2,6,7,7,5	26,64,64,51,52	3,1,0,4,1	244	122	1.25352e-05	0.000508149	0.917,0.755,0.714,0.696,0.655	0.813,0.97,1.0,0.864,0.963	-0.175	SE	chr15:76711355:76711530:76710963:76711083:76712866:76712923	167	27	257	9	194	266
35521	ENSMUSG00000019978	Epb41l2	chr10	+	35521	284197266266309	29,44,41,35,24	303232347211315	9,4,5,3,6	244	122	0	0	0.83,0.691,0.764,0.792,0.866	0.944,0.967,0.972,0.972,0.963	-0.175	SE	chr10:25504136:25504259:25488950:25489093:25506174:25506273	1322	173	1408	27	1495	1435
48071	ENSMUSG00000020798	Spns3	chr11	-	48071	13,35,20,34,45	0,13,6,2,9	52,60,36,56,57	4,0,4,0,0	244	122	7.82286e-06	0.000335166	1.0,0.574,0.625,0.895,0.714	0.867,1.0,0.818,1.0,1.0	-0.175	SE	chr11:72529533:72529723:72499637:72499736:72545887:72545953	147	30	261	8	177	269
30714	ENSMUSG00000109975	Gm19196	chr12	+	30714	0,0,0,0,0	24,17,6,16,23	7,0,6,12,4	12,7,17,13,16	219	122	1.50993e-11	1.67332e-09	0.0,0.0,0.0,0.0,0.0	0.245,0.0,0.164,0.34,0.122	-0.174	SE	chr12:21554008:21554106:21549866:21549954:21554376:21554474	0	86	29	65	86	94
47031	ENSMUSG00000074513	Arfip1	chr3	-	47031	56,73,73,80,112	55,36,28,42,62	90,91,123,110,156	33,17,41,25,41	217	122	5.12613e-05	0.0017487	0.364,0.533,0.594,0.517,0.504	0.605,0.751,0.628,0.712,0.681	-0.173	SE	chr3:84529169:84529265:84527685:84527798:84534586:84534695	394	223	570	157	617	727
3380	ENSMUSG00000055204	Ankrd17	chr5	-	3380	30,19,37,36,15	15,6,22,9,8	22,27,23,29,25	5,0,8,7,0	124	122	0.000431633	0.011613	0.663,0.757,0.623,0.797,0.648	0.812,1.0,0.739,0.803,1.0	-0.173	A3SS	chr5:90278242:90278391:90278242:90278388:90282850:90283603	137	60	126	20	197	146
39862	ENSMUSG00000033386	Frrs1	chr3	+	39862	33,55,23,50,41	5,1,11,0,4	38,34,148,31,27	0,0,0,0,0	220	122	9.18774e-09	7.2181e-07	0.785,0.968,0.537,1.0,0.85	1.0,1.0,1.0,1.0,1.0	-0.172	SE	chr3:116890904:116891003:116885106:116885289:116891839:116891987	202	21	278	0	223	278
3313	ENSMUSG00000041459	Tardbp	chr4	-	3313	85,89,65,25,56	9,27,24,18,2	77,67,86,54,58	0,9,5,3,0	130	122	3.17047e-07	2.3412e-05	0.899,0.756,0.718,0.566,0.963	1.0,0.875,0.942,0.944,1.0	-0.172	A5SS	chr4:148618664:148618791:148618673:148618791:148617565:148617635	320	80	342	17	400	359
16925	ENSMUSG00000000673	Haao	chr17	-	16925	281220120171199	53,37,42,45,55	252326275335269	29,28,33,20,24	244	122	7.83973e-11	7.93453e-09	0.726,0.748,0.588,0.655,0.644	0.813,0.853,0.806,0.893,0.849	-0.171	SE	chr17:83834778:83834924:83832326:83832395:83835190:83835234	991	232	1457	134	1223	1591
39212	ENSMUSG00000049755	Zfp672	chr11	-	39212	54,33,46,47,58	21,6,7,0,20	51,53,53,22,80	0,2,4,1,6	209	122	3.60044e-05	0.00127198	0.6,0.762,0.793,1.0,0.629	1.0,0.939,0.886,0.928,0.886	-0.171	SE	chr11:58319866:58319954:58319323:58319590:58322568:58322729	238	54	259	13	292	272
44727	ENSMUSG00000015605	Srf	chr17	-	44727	160154173183230	29,29,44,40,26	128193202204127	3,15,23,2,9	244	122	9.36696e-10	8.42687e-08	0.734,0.726,0.663,0.696,0.816	0.955,0.865,0.815,0.981,0.876	-0.171	SE	chr17:46549844:46550036:46549435:46549512:46550900:46551020	900	168	854	52	1068	906
11559	ENSMUSG00000052609	Plekhg3	chr12	+	11559	21,21,30,34,20	4,5,14,12,4	4,21,22,22,26	4,0,4,0,0	244	122	0.0016477	0.0324384	0.724,0.677,0.517,0.586,0.714	0.333,1.0,0.733,1.0,1.0	-0.17	SE	chr12:76572394:76572658:76572049:76572069:76573246:76573360	126	39	95	8	165	103
29544	ENSMUSG00000048440	Cyp4f16	chr17	+	29544	31,55,27,53,42	3,4,6,6,9	81,79,60,78,73	1,2,3,3,0	244	122	5.19032e-07	2.99739e-05	0.838,0.873,0.692,0.815,0.7	0.976,0.952,0.909,0.929,1.0	-0.17	SE	chr17:32540270:32540415:32536994:32537196:32542737:32542791	208	28	371	9	236	380
34111	ENSMUSG00000023861	Mpc1	chr17	+	34111	4,23,16,15,16	5,3,0,3,0	8,16,23,12,17	0,0,0,0,0	125	122	0.00036707	0.00921134	0.438,0.882,1.0,0.83,1.0	1.0,1.0,1.0,1.0,1.0	-0.17	SE	chr17:8293414:8293418:8283761:8283961:8296534:8296631	74	11	76	0	85	76
47369	ENSMUSG00000050323	Ndufaf6	chr4	-	47369	47,67,40,68,43	21,25,11,13,7	48,72,98,57,85	1,14,1,5,16	178	122	3.28923e-05	0.00117883	0.605,0.647,0.714,0.782,0.808	0.971,0.779,0.985,0.887,0.785	-0.17	SE	chr4:11066650:11066707:11059011:11059113:11070199:11070322	265	77	360	37	342	397
5001	ENSMUSG00000033728	Lrrc14	chr15	+	5001	49,34,33,31,19	2,6,7,7,5	24,61,56,48,52	3,1,0,4,1	230	122	2.22948e-05	0.000839728	0.929,0.75,0.714,0.701,0.668	0.809,0.97,1.0,0.864,0.965	-0.169	SE	chr15:76711421:76711530:76710963:76711083:76712866:76713220	166	27	241	9	193	250
21686	ENSMUSG00000025871	4833439L19Rik	chr13	-	21686	231164216281274	50,55,66,69,80	222335290249276	22,37,32,33,22	209	122	7.99361e-15	1.21509e-12	0.729,0.635,0.656,0.704,0.667	0.855,0.841,0.841,0.815,0.88	-0.168	SE	chr13:54564184:54564272:54561570:54561871:54565181:54565356	1166	320	1372	146	1486	1518
23639	ENSMUSG00000021569	Trip13	chr13	-	23639	445417387443352	36,41,69,60,42	340502515466411	4,8,4,1,0	222	122	0	0	0.872,0.848,0.755,0.802,0.822	0.979,0.972,0.986,0.996,1.0	-0.167	SE	chr13:73920347:73920448:73919994:73920101:73921172:73921214	2044	248	2234	17	2292	2251
37319	ENSMUSG00000050379	Sept6	chrX	-	37319	320310353397371	151154137179124	259326252289288	58,79,59,28,41	166	122	7.2331e-13	9.43968e-11	0.609,0.597,0.654,0.62,0.687	0.766,0.752,0.758,0.884,0.838	-0.166	SE	chrX:36920368:36920413:36911325:36913254:36922839:36923030	1751	745	1414	265	2496	1679
15988	ENSMUSG00000032594	Ip6k1	chr9	+	15988	29,14,23,18,28	3,1,7,5,5	17,8,28,17,29	0,1,1,0,1	189	122	2.52487e-07	1.56031e-05	0.862,0.9,0.68,0.699,0.783	1.0,0.838,0.948,1.0,0.949	-0.162	SE	chr9:108045245:108045313:108045006:108045022:108045462:108046143	112	21	99	3	133	102
676	ENSMUSG00000022377	Asap1	chr15	-	676	31,22,41,26,19	115,75,94,81,114	30,70,78,47,75	97,64,80,76,119	157	122	6.92996e-06	0.000321088	0.173,0.186,0.253,0.2,0.115	0.194,0.459,0.431,0.325,0.329	-0.162	A5SS	chr15:64158881:64159004:64158917:64159004:64152829:64152930	139	479	300	436	618	736
19515	ENSMUSG00000057551	Zfp317	chr9	+	19515	59,59,77,73,50	23,5,11,11,12	75,71,115,59,84	0,8,3,0,6	176	122	4.90793e-08	3.45857e-06	0.64,0.891,0.829,0.821,0.743	1.0,0.86,0.964,1.0,0.907	-0.161	SE	chr9:19632333:19632388:19629096:19629206:19641065:19641254	318	62	404	17	380	421
44160	ENSMUSG00000040785	Ttc3	chr16	+	44160	45,38,24,60,30	11,12,8,16,9	81,80,61,42,83	5,3,9,8,12	184	122	6.03354e-05	0.00200649	0.731,0.677,0.665,0.713,0.688	0.915,0.946,0.818,0.777,0.821	-0.161	SE	chr16:94393111:94393174:94370617:94370861:94403313:94403343	197	56	347	37	253	384
20356	ENSMUSG00000055541	Lair1	chr7	-	20356	31,43,12,34,26	6,5,8,0,3	28,48,29,19,19	2,0,1,0,3	244	122	0.000478619	0.0114308	0.721,0.811,0.429,1.0,0.813	0.875,1.0,0.935,1.0,0.76	-0.159	SE	chr7:4028706:4029036:4010729:4010846:4055796:4055953	146	22	143	6	168	149
37918	ENSMUSG00000097290	1300002E11Rik	chr16	+	37918	20,4,12,5,7	27,27,42,28,50	24,20,37,18,16	25,49,30,31,18	244	122	2.27318e-05	0.000853386	0.27,0.069,0.125,0.082,0.065	0.324,0.169,0.381,0.225,0.308	-0.159	SE	chr16:21806970:21807119:21801280:21801356:21808677:21809040	48	174	115	153	222	268
8291	ENSMUSG00000022677	Fopnl	chr16	-	8291	91,76,72,52,98	46,42,22,46,26	100,135,96,97,146	21,32,27,31,23	244	122	0.00115037	0.0239328	0.497,0.475,0.621,0.361,0.653	0.704,0.678,0.64,0.61,0.76	-0.157	SE	chr16:14313815:14314013:14304453:14304587:14317293:14317347	389	182	574	134	571	708
2121	ENSMUSG00000040945	Rcc2	chr4	+	2121	53,33,34,52,42	52,57,87,58,77	30,51,56,45,71	34,50,60,24,32	182	122	0.00134414	0.0273193	0.406,0.28,0.208,0.375,0.268	0.372,0.406,0.385,0.557,0.598	-0.156	SE	chr4:140701143:140701204:140700540:140700749:140701510:140701650	214	331	253	200	545	453
23791	ENSMUSG00000024127	Prepl	chr17	-	23791	74,40,58,64,59	19,5,23,19,16	61148109161115	6,11,23,12,15	244	122	0.000114053	0.00347805	0.661,0.8,0.558,0.627,0.648	0.836,0.871,0.703,0.87,0.793	-0.156	SE	chr17:85088339:85088875:85083192:85083315:85090105:85090267	295	82	594	67	377	661
39914	ENSMUSG00000045427	Hnrnph2	chrX	+	39914	211247220273187	434485409559442	367476341358382	334363488349439	166	122	1.25444e-12	1.59515e-10	0.263,0.272,0.283,0.264,0.237	0.447,0.491,0.339,0.43,0.39	-0.156	SE	chrX:134602917:134602962:134602691:134602762:134604854:134606384	1138	2329	1924	1973	3467	3897
708	ENSMUSG00000057894	Zfp329	chr7	-	708	35,19,33,18,22	2,0,1,4,5	14,3,7,36,29	0,0,0,0,0	244	122	9.11037e-06	0.000400076	0.897,1.0,0.943,0.692,0.688	1.0,1.0,1.0,1.0,1.0	-0.156	A5SS	chr7:12809696:12811666:12810805:12811666:12807911:12807973	127	12	89	0	139	89
37193	ENSMUSG00000040761	Spen	chr4	-	37193	11,7,18,14,13	60,14,24,33,32	20,10,10,17,34	18,14,21,24,15	190	122	0.00269825	0.0482861	0.105,0.243,0.325,0.214,0.207	0.416,0.314,0.234,0.313,0.593	-0.155	SE	chr4:141480745:141480814:141471369:141479389:141483724:141483825	63	163	91	92	226	183
9244	ENSMUSG00000028438	Kif24	chr4	-	9244	28,29,34,54,24	6,2,0,2,8	41,32,48,52,37	0,0,1,0,0	209	122	9.00674e-08	6.06678e-06	0.731,0.894,1.0,0.94,0.637	1.0,1.0,0.966,1.0,1.0	-0.153	SE	chr4:41409731:41409819:41404676:41404798:41423451:41423635	169	18	210	1	187	211
37213	ENSMUSG00000026504	Sdccag8	chr1	+	37213	155,83,118,89,148	14,23,11,23,23	111,140,104,114,93	8,15,1,9,0	235	122	1.36343e-05	0.000546393	0.852,0.652,0.848,0.668,0.77	0.878,0.829,0.982,0.868,1.0	-0.153	SE	chr1:176828869:176828983:176814659:176815055:176831056:176831182	593	94	562	33	687	595
3413	ENSMUSG00000023007	Prpf40b	chr15	+	3413	0,1,0,2,3	21,4,10,21,25	4,4,3,1,7	14,14,12,4,5	200	122	3.35433e-05	0.00166926	0.0,0.132,0.0,0.055,0.068	0.148,0.148,0.132,0.132,0.461	-0.153	A3SS	chr15:99315111:99315286:99315190:99315286:99314842:99314980	6	81	19	49	87	68
46525	ENSMUSG00000015314	Slamf6	chr1	+	46525	3.03529e+19	712628738696970	3.24232e+19	322257288319329	193	122	0	0	0.729,0.747,0.679,0.75,0.687	0.864,0.887,0.858,0.87,0.871	-0.152	SE	chr1:171941624:171941696:171939395:171939469:171947998:171948075	15108	3744	16070	1515	18852	17585
20309	ENSMUSG00000020063	Sirt1	chr10	-	20309	75,61,83,89,95	9,14,12,23,6	70,104,147,111,99	9,5,3,4,1	238	122	7.27125e-07	4.04033e-05	0.81,0.691,0.78,0.665,0.89	0.799,0.914,0.962,0.934,0.981	-0.151	SE	chr10:63336979:63337096:63335635:63335877:63338564:63339032	403	64	531	22	467	553
44166	ENSMUSG00000040785	Ttc3	chr16	+	44166	35,41,41,59,33	17,14,13,24,3	28,48,61,35,58	11,4,5,4,4	185	122	0.00109886	0.0230424	0.576,0.659,0.675,0.618,0.879	0.627,0.888,0.889,0.852,0.905	-0.151	SE	chr16:94412059:94412123:94403313:94403368:94415948:94415958	209	71	230	28	280	258
726	ENSMUSG00000017405	Nek8	chr11	-	726	16,21,11,25,27	0,7,3,0,0	12,12,11,17,14	0,0,0,0,0	244	122	0.000877822	0.0109373	1.0,0.6,0.647,1.0,1.0	1.0,1.0,1.0,1.0,1.0	-0.151	RI	chr11:78170872:78172683:78170872:78171298:78172450:78172683	100	10	66	0	110	66
35389	ENSMUSG00000042520	Ubap2l	chr3	-	35389	655537477556464	477365477341403	660749911532879	293323350231348	196	122	1.63558e-12	2.04057e-10	0.461,0.478,0.384,0.504,0.417	0.584,0.591,0.618,0.589,0.611	-0.15	SE	chr3:90031295:90031370:90028324:90028377:90034064:90034177	2689	2063	3731	1545	4752	5276
48283	ENSMUSG00000027406	Idh3b	chr2	-	48283	769943702866695	122,126,111,93,88	8.76109e+18	44,33,45,34,22	244	122	0	0	0.759,0.789,0.76,0.823,0.798	0.909,0.943,0.923,0.939,0.963	-0.15	SE	chr2:130279555:130279726:130279312:130279437:130280262:130280323	3975	540	5223	178	4515	5401
15886	ENSMUSG00000025372	Baiap2	chr11	+	15886	2,6,0,3,9	37,19,35,43,25	9,10,18,18,14	19,39,36,43,22	169	122	5.76168e-06	0.000253988	0.038,0.186,0.0,0.048,0.206	0.255,0.156,0.265,0.232,0.315	-0.149	SE	chr11:120003037:120003085:120000551:120000586:120006358:120006782	20	159	69	159	179	228
34708	ENSMUSG00000055991	Zkscan5	chr5	+	34708	7,9,21,11,20	2,1,3,5,0	20,18,12,16,11	0,0,4,0,0	204	122	0.000185454	0.00520716	0.677,0.843,0.807,0.568,1.0	1.0,1.0,0.642,1.0,1.0	-0.149	SE	chr5:145211745:145211828:145207562:145207708:145218286:145218296	68	11	77	4	79	81
375	ENSMUSG00000034940	Synrg	chr11	+	375	17,21,48,36,31	7,1,2,6,1	12,17,19,18,20	0,0,0,1,1	244	122	3.94674e-06	0.000183838	0.548,0.913,0.923,0.75,0.939	1.0,1.0,1.0,0.9,0.909	-0.147	SE	chr11:83985248:83985551:83982195:83982307:83987912:83987990	153	17	86	2	170	88
26923	ENSMUSG00000040374	Pex2	chr3	-	26923	51,87,110,124,60	133,114,90,112,145	132207132131162	111,130,121,98,100	185	122	0.000171894	0.00489219	0.202,0.335,0.446,0.422,0.214	0.44,0.512,0.418,0.469,0.517	-0.147	SE	chr3:5562668:5562732:5560187:5561764:5563164:5563272	432	594	764	560	1026	1324
43743	ENSMUSG00000028797	Tmem234	chr4	+	43743	49,61,33,47,52	2,14,10,9,2	46,90,76,85,38	2,3,9,2,0	244	122	0.000716612	0.0160084	0.925,0.685,0.623,0.723,0.929	0.92,0.938,0.809,0.955,1.0	-0.147	SE	chr4:129601406:129601625:129600982:129601134:129602221:129602261	242	37	335	16	279	351
44393	ENSMUSG00000107283	Mpv17	chr5	-	44393	81,65,50,60,54	17,17,18,10,9	57,94,69,64,69	9,11,2,1,3	160	122	2.14322e-06	0.000106554	0.784,0.745,0.679,0.821,0.821	0.828,0.867,0.963,0.98,0.946	-0.147	SE	chr5:31145239:31145278:31144699:31144752:31145494:31145590	310	71	353	26	381	379
35390	ENSMUSG00000042520	Ubap2l	chr3	-	35390	904638696824616	477365477341403	9.76965e+16	293323350231348	181	122	4.80282e-13	6.33047e-11	0.561,0.541,0.496,0.62,0.507	0.692,0.668,0.706,0.702,0.689	-0.146	SE	chr3:90031310:90031370:90028324:90028377:90034064:90034177	3678	2063	5135	1545	5741	6680
14466	ENSMUSG00000023764	Sfi1	chr11	-	14466	20,24,21,8,16	3,0,0,7,0	20,12,11,11,6	0,1,0,0,0	244	122	0.00214239	0.040283	0.769,1.0,1.0,0.364,1.0	1.0,0.857,1.0,1.0,1.0	-0.145	SE	chr11:3188877:3189056:3187239:3187410:3193359:3193424	89	10	60	1	99	61
4659	ENSMUSG00000032946	Rasgrp2	chr19	+	4659	109,114,81,129,146	142104142150172	124147107120106	90,86,81,70,83	160	122	5.19791e-07	6.04639e-05	0.369,0.455,0.303,0.396,0.393	0.512,0.566,0.502,0.567,0.493	-0.145	A3SS	chr19:6402991:6403086:6403030:6403086:6401720:6401863	579	710	604	410	1289	1014
8435	ENSMUSG00000102644	Thap6	chr5	+	8435	18,12,13,15,15	8,0,0,3,0	11,5,24,5,14	0,0,0,0,0	224	122	0.000135656	0.00399555	0.551,1.0,1.0,0.731,1.0	1.0,1.0,1.0,1.0,1.0	-0.144	SE	chr5:91963682:91963785:91962889:91962978:91965095:91965304	73	11	59	0	84	59
37129	ENSMUSG00000002885	Adgre5	chr8	-	37129	215197220185216	207224179187195	387194230208210	147,150,118,88,134	244	122	7.1897e-07	4.00062e-05	0.342,0.305,0.381,0.331,0.356	0.568,0.393,0.494,0.542,0.439	-0.144	SE	chr8:83731902:83732037:83730110:83730257:83733413:83733566	1033	992	1229	637	2025	1866
1846	ENSMUSG00000021661	Ankra2	chr13	+	1846	82,58,60,71,56	79,89,71,47,60	119,97,128,103,126	60,56,78,63,66	244	122	9.51587e-06	0.000301926	0.342,0.246,0.297,0.43,0.318	0.498,0.464,0.451,0.45,0.488	-0.144	RI	chr13:98272771:98273918:98272771:98272852:98273377:98273918	327	346	573	323	673	896
32901	ENSMUSG00000007035	Msh5	chr17	-	32901	72,76,87,69,80	16,29,23,28,26	64,88,76,78,110	12,11,9,11,17	184	122	1.55385e-05	0.000610372	0.749,0.635,0.715,0.62,0.671	0.78,0.841,0.848,0.825,0.811	-0.143	SE	chr17:35045113:35045176:35044316:35044438:35045293:35045374	384	122	416	60	506	476
4531	ENSMUSG00000037999	Arap2	chr5	-	4531	18,17,32,29,11	0,0,12,0,5	22,19,20,17,27	0,1,0,1,0	244	122	6.4858e-05	0.00213365	1.0,1.0,0.571,1.0,0.524	1.0,0.905,1.0,0.895,1.0	-0.141	SE	chr5:62606074:62606209:62602444:62604656:62611703:62611767	107	17	105	2	124	107
26089	ENSMUSG00000030766	Arhgap17	chr7	-	26089	60,63,94,70,55	64,58,46,54,66	73,88,155,45,109	32,53,54,29,44	244	122	0.000543126	0.0126977	0.319,0.352,0.505,0.393,0.294	0.533,0.454,0.589,0.437,0.553	-0.141	SE	chr7:123294471:123294705:123292035:123292205:123296409:123296566	342	288	470	212	630	682
34007	ENSMUSG00000020792	Exoc7	chr11	-	34007	48,36,36,74,30	133144196214133	10,31,17,23,20	17,31,41,19,42	244	122	7.13871e-06	0.000307515	0.153,0.111,0.084,0.147,0.101	0.227,0.333,0.172,0.377,0.192	-0.141	SE	chr11:116296729:116296880:116295543:116295689:116297570:116297663	224	820	101	150	1044	251
34801	ENSMUSG00000046707	Csnk2a2	chr8	-	34801	123,93,95,91,102	11,11,14,2,15	89146140132146	2,2,0,0,1	223	122	1.66533e-15	2.64282e-13	0.859,0.822,0.788,0.961,0.788	0.961,0.976,1.0,1.0,0.988	-0.141	SE	chr8:95477211:95477313:95465650:95465710:95487564:95487579	504	53	653	5	557	658
1928	ENSMUSG00000025316	Banp	chr8	+	1928	404369371425397	89,70,109,76,89	342587478416364	23,56,59,37,45	244	122	1.09979e-12	1.40751e-10	0.694,0.725,0.63,0.737,0.69	0.881,0.84,0.802,0.849,0.802	-0.14	SE	chr8:122020518:122020644:122007752:122007791:122024002:122024146	1966	433	2187	220	2399	2407
6581	ENSMUSG00000004565	Pnpla6	chr8	+	6581	42,40,30,36,24	1,7,7,1,2	128,59,90,61,43	1,3,0,0,0	238	122	1.8546e-07	1.17351e-05	0.956,0.745,0.687,0.949,0.86	0.985,0.91,1.0,1.0,1.0	-0.14	SE	chr8:3537968:3538085:3537450:3537520:3541290:3541592	172	18	381	4	190	385
8926	ENSMUSG00000033545	Znrf1	chr8	+	8926	18,18,28,20,20	7,0,5,4,3	24,29,14,12,34	6,0,0,1,0	223	122	0.00259388	0.0468197	0.585,1.0,0.754,0.732,0.785	0.686,1.0,1.0,0.868,1.0	-0.14	SE	chr8:111606746:111606848:111538342:111538466:111609292:111609364	104	19	113	7	123	120
26766	ENSMUSG00000022139	Mbnl2	chr14	+	26766	35,30,43,42,39	124111156101135	84,106,97,95,63	132120162105112	216	122	8.75466e-12	9.95222e-10	0.138,0.132,0.135,0.19,0.14	0.264,0.333,0.253,0.338,0.241	-0.139	SE	chr14:120404637:120404732:120396450:120396604:120428934:120429626	189	627	445	631	816	1076
28755	ENSMUSG00000061533	Cep128	chr12	-	28755	62,46,69,62,52	15,3,5,4,7	63,51,86,63,86	0,3,0,0,0	208	122	2.96254e-11	3.16808e-09	0.708,0.9,0.89,0.901,0.813	1.0,0.909,1.0,1.0,1.0	-0.139	SE	chr12:91364359:91364446:91348749:91348876:91370061:91370196	291	34	349	3	325	352
46562	ENSMUSG00000034908	Sidt2	chr9	-	46562	2,6,10,9,13	39,55,49,36,31	56,26,50,28,55	101,87,99,70,56	190	122	3.71511e-06	0.000174637	0.032,0.065,0.116,0.138,0.212	0.263,0.161,0.245,0.204,0.387	-0.139	SE	chr9:45947628:45947697:45946983:45947055:45947835:45947888	40	210	215	413	250	628
2610	ENSMUSG00000036923	Stox1	chr10	-	2610	21,29,28,26,28	7,6,1,0,1	40,52,25,62,31	3,0,0,0,0	244	122	3.83624e-06	0.000206024	0.6,0.707,0.933,1.0,0.933	0.87,1.0,1.0,1.0,1.0	-0.139	A5SS	chr10:62663954:62666325:62666125:62666325:62659042:62659667	132	15	210	3	147	213
5196	ENSMUSG00000016181	Diexf	chr1	-	5196	36,19,23,16,12	1,3,10,2,5	26,32,41,20,41	3,1,1,2,0	143	122	8.30269e-05	0.00315742	0.968,0.844,0.662,0.872,0.672	0.881,0.965,0.972,0.895,1.0	-0.139	A3SS	chr1:193113756:193114002:193113756:193113980:193114604:193114717	106	21	160	7	127	167
17176	ENSMUSG00000036054	Sugp2	chr8	+	17176	52,49,60,52,53	2,12,10,6,21	57,79,101,66,59	0,1,5,5,11	208	122	0.000400474	0.00991168	0.938,0.705,0.779,0.836,0.597	1.0,0.979,0.922,0.886,0.759	-0.138	SE	chr8:70261230:70261317:70260441:70260589:70262870:70263105	266	51	362	22	317	384
3674	ENSMUSG00000030780	BC017158	chr7	-	3674	32,12,28,24,22	4,0,10,0,4	53,21,28,26,28	2,0,2,0,0	244	122	1.39729e-05	0.000401105	0.8,1.0,0.583,1.0,0.733	0.93,1.0,0.875,1.0,1.0	-0.138	RI	chr7:128274632:128276143:128274632:128274723:128276085:128276143	118	18	156	4	136	160
22125	ENSMUSG00000024978	Gpam	chr19	-	22125	267147380215314	51,29,80,54,82	381244273291350	36,33,34,10,13	180	122	1.59095e-13	2.16905e-11	0.78,0.775,0.763,0.73,0.722	0.878,0.834,0.845,0.952,0.948	-0.137	SE	chr19:55072711:55072770:55069733:55071046:55074570:55074760	1323	296	1539	126	1619	1665
2676	ENSMUSG00000028677	Rnf220	chr4	-	2676	477372454505489	146158164209172	531755703607563	92130139150100	199	122	6.82787e-14	1.2411e-11	0.667,0.591,0.629,0.597,0.635	0.78,0.781,0.756,0.713,0.775	-0.137	A5SS	chr4:117285850:117285972:117285928:117285972:117285378:117285511	2297	849	3159	611	3146	3770
20557	ENSMUSG00000019790	Stxbp5	chr10	-	20557	2,3,6,0,1	30,18,30,31,19	3,16,15,1,6	17,12,30,13,37	181	122	0.000286946	0.00750942	0.043,0.101,0.119,0.0,0.034	0.106,0.473,0.252,0.049,0.099	-0.136	SE	chr10:9784340:9784400:9778020:9778071:9789362:9789428	12	128	41	109	140	150
12939	ENSMUSG00000032411	Tfdp2	chr9	+	12939	87,80,79,70,47	10,10,13,5,8	68,95,92,100,79	1,2,0,2,0	169	122	1.9218e-13	2.61114e-11	0.863,0.852,0.814,0.91,0.809	0.98,0.972,1.0,0.973,1.0	-0.135	SE	chr9:96290579:96290627:96273838:96273942:96294964:96295127	363	46	434	5	409	439
31435	ENSMUSG00000028708	Mknk1	chr4	+	31435	94,102,137,120,80	13,27,13,29,8	94128131127134	2,2,4,9,5	165	122	3.43213e-11	3.6311e-09	0.842,0.736,0.886,0.754,0.881	0.972,0.979,0.96,0.913,0.952	-0.135	SE	chr4:115876580:115876624:115875380:115875545:115877949:115879250	533	90	614	22	623	636
31871	ENSMUSG00000035778	Ggta1	chr2	-	31871	82,82,60,77,62	10,16,19,27,20	55,71,89,89,89	5,4,7,17,13	187	122	0.00041142	0.0101194	0.843,0.77,0.673,0.65,0.669	0.878,0.921,0.892,0.774,0.817	-0.135	SE	chr2:35414218:35414284:35413325:35413427:35416471:35416507	363	92	393	46	455	439
1014	ENSMUSG00000049606	Zfp644	chr5	-	1014	148,89,179,146,151	13,10,33,12,25	96,67,139,97,173	12,0,0,0,12	244	122	1.2402e-06	6.49984e-05	0.851,0.817,0.731,0.859,0.751	0.8,1.0,1.0,1.0,0.878	-0.134	SE	chr5:106634830:106635436:106619539:106619642:106635609:106636323	713	93	572	24	806	596
1383	ENSMUSG00000063052	Lrrc40	chr3	+	1383	65,96,69,112,86	62,82,46,77,42	75,113,77,70,84	19,44,48,31,33	161	122	0.000932421	0.0200939	0.443,0.47,0.532,0.524,0.608	0.749,0.661,0.549,0.631,0.659	-0.134	SE	chr3:158041619:158041659:158040440:158040622:158043560:158043690	428	309	419	175	737	594
6777	ENSMUSG00000021596	Mctp1	chr13	+	6777	9,9,7,5,7	82,42,69,31,62	15,28,17,19,34	64,36,92,47,71	160	122	3.81765e-06	0.000179032	0.077,0.14,0.072,0.11,0.079	0.152,0.372,0.123,0.236,0.267	-0.134	SE	chr13:76731770:76731809:76723667:76723779:76756985:76757156	37	286	113	310	323	423
23555	ENSMUSG00000038005	Hpf1	chr8	+	23555	27,42,43,46,22	12,0,7,0,0	20,14,31,28,34	0,0,0,0,0	220	122	2.03131e-06	0.000101755	0.555,1.0,0.773,1.0,1.0	1.0,1.0,1.0,1.0,1.0	-0.134	SE	chr8:60896737:60896836:60893700:60893860:60905547:60905720	180	19	127	0	199	127
38200	ENSMUSG00000028863	Meaf6	chr4	+	38200	40,42,52,57,53	4,4,8,32,5	51,51,57,66,66	2,5,4,2,1	179	122	3.84201e-05	0.00135011	0.872,0.877,0.816,0.548,0.878	0.946,0.874,0.907,0.957,0.978	-0.134	SE	chr4:125107651:125107709:125107516:125107546:125108322:125108356	244	53	291	14	297	305
6303	ENSMUSG00000070808	Bicra	chr7	-	6303	23,18,12,7,19	0,2,6,0,4	17,8,8,12,18	0,1,0,0,0	187	122	7.21019e-06	0.000310257	1.0,0.854,0.566,1.0,0.756	1.0,0.839,1.0,1.0,1.0	-0.133	SE	chr7:15993079:15993145:15987478:15989440:15996400:15996443	79	12	63	1	91	64
34053	ENSMUSG00000041215	Yeats2	chr16	+	34053	73,30,82,78,63	12,2,6,8,17	41,74,69,38,77	1,1,4,1,5	240	122	3.3896e-05	0.00120393	0.756,0.884,0.874,0.832,0.653	0.954,0.974,0.898,0.951,0.887	-0.133	SE	chr16:20150441:20150560:20141066:20141235:20152908:20153006	326	45	299	12	371	311
34112	ENSMUSG00000023861	Mpc1	chr17	+	34112	13,37,24,26,8	5,3,0,3,0	18,27,35,35,21	0,0,0,0,0	202	122	0.000134548	0.00397176	0.611,0.882,1.0,0.84,1.0	1.0,1.0,1.0,1.0,1.0	-0.133	SE	chr17:8293414:8293495:8283851:8283961:8296534:8296631	108	11	136	0	119	136
22169	ENSMUSG00000039997	Ifi203	chr1	-	22169	96,65,75,121,58	15,0,7,10,6	96,93,81,65,66	0,0,2,0,0	244	122	9.17511e-12	1.03707e-09	0.762,1.0,0.843,0.858,0.829	1.0,1.0,0.953,1.0,1.0	-0.132	SE	chr1:173933782:173933926:173928274:173929516:173935009:173935177	415	38	401	2	453	403
28699	ENSMUSG00000028689	Ccdc163	chr4	+	28699	10,22,17,21,5	0,8,2,9,0	34,42,24,42,28	4,0,0,0,0	152	122	6.60723e-07	3.69725e-05	1.0,0.688,0.872,0.652,1.0	0.872,1.0,1.0,1.0,1.0	-0.132	SE	chr4:116709242:116709273:116708928:116709094:116709437:116709619	75	19	170	4	94	174
32616	ENSMUSG00000036167	Pphln1	chr15	+	32616	320265363355333	140,78,114,133,124	314513483315374	94,83,54,46,81	178	122	4.1672e-09	3.43007e-07	0.61,0.7,0.686,0.647,0.648	0.696,0.809,0.86,0.824,0.76	-0.132	SE	chr15:93452116:93452173:93441500:93441712:93455450:93455530	1636	589	1999	358	2225	2357
40345	ENSMUSG00000087178	A230056P14Rik	chr7	+	40345	42,15,22,22,18	1,2,1,10,5	36,55,39,13,32	0,0,0,4,1	209	122	4.15254e-05	0.00145025	0.961,0.814,0.928,0.562,0.678	1.0,1.0,1.0,0.655,0.949	-0.132	SE	chr7:55976579:55976667:55975691:55975830:55976763:55976984	119	19	175	5	138	180
33290	ENSMUSG00000055447	Cd47	chr16	+	33290	101,94,11,16,11	430557312452410	79,127,86,108,116	291381309328306	154	122	0	0	0.157,0.118,0.027,0.027,0.021	0.177,0.209,0.181,0.207,0.231	-0.131	SE	chr16:49908702:49908735:49908053:49908078:49910868:49910876	233	2161	516	1615	2394	2131
4280	ENSMUSG00000039599	Fam149b	chr14	+	4280	69,54,78,94,52	2,14,7,1,4	94,122,110,93,124	0,0,1,2,0	244	122	8.66257e-10	7.82868e-08	0.945,0.659,0.848,0.979,0.867	1.0,1.0,0.982,0.959,1.0	-0.129	SE	chr14:20377774:20377999:20375509:20375613:20378399:20378523	347	28	543	3	375	546
37031	ENSMUSG00000070972	Dnajc25	chr4	+	37031	22,6,11,33,21	37,28,54,54,40	48,55,30,24,22	51,38,56,41,23	244	122	0.000947484	0.0203715	0.229,0.097,0.092,0.234,0.208	0.32,0.42,0.211,0.226,0.324	-0.128	SE	chr4:59013631:59013855:59003192:59003557:59017669:59017822	93	213	179	209	306	388
17850	ENSMUSG00000004319	Clcn3	chr8	-	17850	16,7,8,21,8	61,41,42,42,46	17,29,26,27,22	40,31,47,31,49	244	122	2.03716e-05	0.000774903	0.116,0.079,0.087,0.2,0.08	0.175,0.319,0.217,0.303,0.183	-0.127	SE	chr8:60914577:60914828:60910860:60913175:60919339:60919556	60	232	121	198	292	319
27046	ENSMUSG00000043411	Usp48	chr4	+	27046	62,29,30,52,38	104,104,105,84,89	99,84,90,81,113	109,93,152,109,128	175	122	1.13064e-05	0.000467262	0.294,0.163,0.166,0.301,0.229	0.388,0.386,0.292,0.341,0.381	-0.127	SE	chr4:137636933:137636987:137634897:137635008:137637759:137637890	211	486	467	591	697	1058
550	ENSMUSG00000014668	Chfr	chr5	+	550	12,15,18,23,15	4,7,0,0,0	13,23,30,35,33	0,0,0,0,0	143	122	0.000449151	0.0119221	0.719,0.646,1.0,1.0,1.0	1.0,1.0,1.0,1.0,1.0	-0.127	A3SS	chr5:110140353:110140453:110140375:110140453:110136482:110136652	83	11	134	0	94	134
824	ENSMUSG00000025006	Sorbs1	chr19	-	824	0,0,2,0,1	20,22,37,49,45	15,11,9,11,2	38,34,29,21,47	244	122	5.37348e-13	7.05919e-11	0.0,0.0,0.026,0.0,0.011	0.165,0.139,0.134,0.208,0.021	-0.126	SE	chr19:40376644:40377016:40373475:40373617:40382520:40382633	3	173	48	169	176	217
29199	ENSMUSG00000023795	Pisd-ps2	chr17	-	29199	73,71,87,63,114	10,7,6,21,19	82,60,84,45,54	2,2,3,3,8	244	122	0.000296978	0.00773624	0.785,0.835,0.879,0.6,0.75	0.953,0.937,0.933,0.882,0.771	-0.125	SE	chr17:3080868:3081034:3079354:3079591:3083967:3084040	408	63	325	18	471	343
173	ENSMUSG00000006589	Aprt	chr8	-	173	14,27,11,10,17	4,0,0,0,6	7,17,28,11,12	0,0,0,1,0	244	122	0.000468438	0.00682684	0.636,1.0,1.0,1.0,0.586	1.0,1.0,1.0,0.846,1.0	-0.125	RI	chr8:122576118:122576621:122576118:122576252:122576514:122576621	79	10	75	1	89	76
8653	ENSMUSG00000025958	Creb1	chr1	+	8653	3,13,4,3,6	25,27,15,37,44	26,27,5,6,39	33,33,37,29,37	234	122	0.000260853	0.00693173	0.059,0.201,0.122,0.041,0.066	0.291,0.299,0.066,0.097,0.355	-0.124	SE	chr1:64561752:64561865:64559726:64559768:64566216:64566317	29	148	103	169	177	272
15658	ENSMUSG00000026767	Mindy3	chr2	-	15658	138,77,98,91,99	20,6,14,12,18	233305269209203	7,8,7,5,5	173	122	2.33147e-14	3.43861e-12	0.83,0.9,0.832,0.842,0.795	0.959,0.964,0.964,0.967,0.966	-0.124	SE	chr2:12401024:12401076:12399658:12400137:12403997:12404166	503	70	1219	32	573	1251
4622	ENSMUSG00000018501	Ncor1	chr11	-	4622	37,5,41,19,9	3,5,5,1,2	17,7,24,6,26	0,0,2,3,0	169	122	0.00255558	0.0423616	0.899,0.419,0.855,0.932,0.765	1.0,1.0,0.897,0.591,1.0	-0.124	A3SS	chr11:62373075:62373622:62373075:62373574:62376634:62376761	111	16	80	5	127	85
12539	ENSMUSG00000049871	Nlrc3	chr16	-	12539	19,6,27,14,23	42,72,41,62,27	37,25,31,43,18	29,38,40,49,33	208	122	0.000774754	0.0171718	0.21,0.047,0.279,0.117,0.333	0.428,0.278,0.313,0.34,0.242	-0.123	SE	chr16:3962453:3962540:3959390:3959474:3976328:3976632	89	244	154	189	333	343
18754	ENSMUSG00000038578	Susd1	chr4	-	18754	1,2,0,0,3	21,21,22,15,33	0,14,2,2,0	15,9,4,13,17	231	122	0.00177954	0.034524	0.025,0.048,0.0,0.0,0.046	0.0,0.451,0.209,0.075,0.0	-0.123	SE	chr4:59369530:59369640:59351637:59351729:59390572:59390752	6	112	18	58	118	76
26793	ENSMUSG00000026790	Odf2	chr2	+	26793	224171205214254	70,64,74,95,98	235222283247267	53,67,52,39,63	238	122	4.33201e-06	0.000200546	0.621,0.578,0.587,0.536,0.571	0.694,0.629,0.736,0.765,0.685	-0.123	SE	chr2:29893037:29893154:29892185:29892276:29893443:29893512	1068	401	1254	274	1469	1528
35974	ENSMUSG00000033075	Senp1	chr15	-	35974	136,48,85,58,84	184,94,193,190,170	73,74,125,129,61	110,64,153,115,79	199	122	6.58624e-06	0.000285889	0.312,0.238,0.213,0.158,0.232	0.289,0.415,0.334,0.407,0.321	-0.123	SE	chr15:98061949:98062027:98059915:98059954:98064818:98064873	411	831	462	521	1242	983
805	ENSMUSG00000015377	Dennd6b	chr15	-	805	18,22,13,23,23	0,4,5,0,3	16,24,24,15,22	0,5,0,0,0	244	122	0.00229462	0.0227751	1.0,0.733,0.565,1.0,0.793	1.0,0.706,1.0,1.0,1.0	-0.123	RI	chr15:89186171:89186819:89186171:89186261:89186753:89186819	99	12	101	5	111	106
6947	ENSMUSG00000045503	Sys1	chr2	+	6947	43,10,13,31,11	0,3,6,0,4	1,13,27,24,29	1,0,0,0,0	244	122	1.79294e-05	0.000692567	1.0,0.625,0.52,1.0,0.579	0.333,1.0,1.0,1.0,1.0	-0.122	SE	chr2:164467147:164467327:164463300:164463368:164472137:164472322	108	13	94	1	121	95
23928	ENSMUSG00000005417	Mprip	chr11	+	23928	725502819801778	78,68,92,101,91	770638842684875	24,35,30,20,21	229	122	0	0	0.832,0.797,0.826,0.809,0.82	0.945,0.907,0.937,0.948,0.957	-0.122	SE	chr11:59741990:59742098:59740848:59741261:59743770:59743827	3625	430	3809	130	4055	3939
45063	ENSMUSG00000073792	Alg6	chr4	+	45063	27,24,9,24,26	9,0,1,6,0	33,39,31,38,48	0,0,5,0,0	210	122	8.8603e-05	0.00278766	0.635,1.0,0.839,0.699,1.0	1.0,1.0,0.783,1.0,1.0	-0.122	SE	chr4:99739213:99739302:99726862:99726947:99741533:99741616	110	16	189	5	126	194
45699	ENSMUSG00000070003	Ssbp4	chr8	-	45699	327299259293293	58,72,71,49,88	315425425372365	24,45,52,48,28	181	122	3.74101e-11	3.92647e-09	0.792,0.737,0.711,0.801,0.692	0.898,0.864,0.846,0.839,0.898	-0.122	SE	chr8:70599839:70599899:70599687:70599757:70600395:70600485	1471	338	1902	197	1809	2099
1759	ENSMUSG00000005417	Mprip	chr11	+	1759	4,8,6,5,5	94,83,151,109,128	26,40,23,34,32	74,96,107,82,92	244	122	0	0	0.021,0.046,0.019,0.022,0.019	0.149,0.172,0.097,0.172,0.148	-0.122	A5SS	chr11:59737071:59737582:59737071:59737228:59741119:59741261	28	565	155	451	593	606
4888	ENSMUSG00000036435	Exoc1	chr5	+	4888	2,2,1,5,1	139157158176106	8,38,36,29,34	109102176133180	166	122	0	0	0.01,0.009,0.005,0.02,0.007	0.051,0.215,0.131,0.138,0.122	-0.121	SE	chr5:76557818:76557863:76554099:76554205:76559003:76559167	11	736	145	700	747	845
16893	ENSMUSG00000039929	Urb1	chr16	-	16893	56,19,56,35,20	0,4,2,3,2	46,27,40,27,42	0,1,0,0,0	244	122	0.000333036	0.00849703	1.0,0.704,0.933,0.854,0.833	1.0,0.931,1.0,1.0,1.0	-0.121	SE	chr16:90776124:90776304:90774048:90774901:90777353:90777572	186	11	182	1	197	183
17537	ENSMUSG00000051998	Lax1	chr1	-	17537	153,76,148,118,150	15,12,10,15,19	205121185173159	9,3,5,10,0	225	122	1.94937e-08	1.46754e-06	0.847,0.774,0.889,0.81,0.811	0.925,0.956,0.953,0.904,1.0	-0.121	SE	chr1:133684005:133684109:133683537:133683642:133688820:133689004	645	71	843	27	716	870
21920	ENSMUSG00000034832	Tet3	chr6	-	21920	15,15,17,15,12	1,3,4,5,0	18,4,8,8,17	2,0,1,0,0	178	122	1.46476e-05	0.000581128	0.911,0.774,0.744,0.673,1.0	0.861,1.0,0.846,1.0,1.0	-0.121	SE	chr6:83441216:83441273:83402666:83404824:83454749:83455480	74	13	55	3	87	58
38640	ENSMUSG00000019891	Dcbld1	chr10	+	38640	19,14,19,16,26	3,6,1,0,0	15,9,38,12,7	0,0,1,1,0	244	122	0.000585433	0.0135589	0.76,0.538,0.905,1.0,1.0	1.0,1.0,0.95,0.857,1.0	-0.121	SE	chr10:52261726:52261939:52233618:52233835:52284102:52284237	94	10	81	2	104	83
42760	ENSMUSG00000006705	Pknox1	chr17	+	42760	45,30,34,31,35	68,42,61,61,73	46,48,72,62,42	26,66,52,59,66	244	122	0.00134142	0.0272781	0.249,0.263,0.218,0.203,0.193	0.469,0.267,0.409,0.344,0.241	-0.121	SE	chr17:31581803:31582050:31564748:31564888:31583695:31583803	175	305	270	269	480	539
3389	ENSMUSG00000068134	Zfp120	chr2	-	3389	5,11,11,13,1	58,37,28,67,66	22,20,9,17,46	46,19,57,46,89	205	122	5.3748e-05	0.0015302	0.049,0.15,0.189,0.104,0.009	0.222,0.385,0.086,0.18,0.235	-0.121	A5SS	chr2:150119480:150119628:150119564:150119628:150114405:150118200	41	256	114	257	297	371
15695	ENSMUSG00000029165	Agbl5	chr5	+	15695	100,55,122,88,85	5,7,10,12,7	70,80,63,68,71	0,2,3,2,0	244	122	2.98563e-07	1.81954e-05	0.909,0.797,0.859,0.786,0.859	1.0,0.952,0.913,0.944,1.0	-0.12	SE	chr5:30905630:30905761:30905017:30905155:30906115:30906666	450	41	352	7	491	359
16222	ENSMUSG00000036180	Gatad2a	chr8	-	16222	517530639720668	82,61,108,110,122	471840683675628	26,54,38,25,37	196	122	0	0	0.797,0.844,0.786,0.803,0.773	0.919,0.906,0.918,0.944,0.914	-0.12	SE	chr8:69912163:69912238:69911676:69911869:69912922:69913224	3074	483	3297	180	3557	3477
23213	ENSMUSG00000033488	Cryzl2	chr1	+	23213	33,37,41,50,55	2,12,1,4,0	50,103,29,47,37	0,0,0,0,0	203	122	1.02938e-07	6.8408e-06	0.908,0.649,0.961,0.883,1.0	1.0,1.0,1.0,1.0,1.0	-0.12	SE	chr1:157467165:157467247:157465711:157465821:157488442:157488628	216	19	266	0	235	266
31797	ENSMUSG00000013846	St3gal1	chr15	-	31797	0,0,1,0,2	7,25,24,15,23	0,5,4,9,7	17,15,25,21,20	186	122	1.25467e-07	8.18714e-06	0.0,0.0,0.027,0.0,0.054	0.0,0.179,0.095,0.219,0.187	-0.12	SE	chr15:67162986:67163051:67153042:67153170:67176631:67176712	3	94	25	98	97	123
48512	ENSMUSG00000026707	Nsun6	chr2	-	48512	58,86,71,69,42	3,5,4,9,7	93,134,85,103,111	2,1,1,0,3	231	122	5.26496e-08	3.69703e-06	0.911,0.901,0.904,0.802,0.76	0.961,0.986,0.978,1.0,0.951	-0.12	SE	chr2:15039732:15039842:15038073:15038227:15042226:15042306	326	28	526	7	354	533
711	ENSMUSG00000039456	Morc3	chr16	+	711	83,84,75,95,96	16,19,14,16,21	75,68,90,105,75	3,4,12,6,18	244	122	0.00268559	0.0256137	0.722,0.689,0.728,0.748,0.696	0.926,0.895,0.789,0.897,0.676	-0.12	RI	chr16:93862413:93862715:93862413:93862503:93862640:93862715	433	86	413	43	519	456
2488	ENSMUSG00000074238	Ap1ar	chr3	-	2488	9.38989e+17	124,71,143,123,147	9.35138e+18	37,37,34,19,44	220	122	0	0	0.808,0.885,0.8,0.838,0.813	0.933,0.954,0.951,0.971,0.931	-0.119	SE	chr3:127815595:127815694:127813239:127813295:127816909:127817006	5254	608	5731	171	5862	5902
31629	ENSMUSG00000028107	Tars2	chr3	-	31629	32,38,11,37,21	5,0,5,0,0	13,35,33,23,14	0,0,0,1,0	220	122	0.00279862	0.0497903	0.78,1.0,0.55,1.0,1.0	1.0,1.0,1.0,0.927,1.0	-0.119	SE	chr3:95748041:95748140:95746534:95746697:95750338:95750417	139	10	118	1	149	119
46439	ENSMUSG00000036402	Gng12	chr6	+	46439	28,20,18,15,27	73,71,54,62,71	60,69,56,34,44	59,72,109,104,89	179	122	0.000619684	0.0141866	0.207,0.161,0.185,0.142,0.206	0.409,0.395,0.259,0.182,0.252	-0.119	SE	chr6:66943824:66943882:66914452:66914510:67015724:67015843	108	331	263	433	439	696
12247	ENSMUSG00000033526	Ppip5k1	chr2	-	12247	34,39,37,32,33	2,6,10,10,8	12,6,52,23,61	1,1,0,5,4	244	122	0.00216767	0.0406417	0.895,0.765,0.649,0.615,0.673	0.857,0.75,1.0,0.697,0.884	-0.118	SE	chr2:121327644:121327770:121321654:121321792:121331557:121331648	175	36	154	11	211	165
19753	ENSMUSG00000079845	Xlr4a	chrX	-	19753	218107113226148	23,10,13,21,11	166334193196243	0,8,2,5,6	220	122	1.93845e-13	2.62478e-11	0.84,0.856,0.828,0.856,0.882	1.0,0.959,0.982,0.956,0.957	-0.118	SE	chrX:73076732:73076831:73074834:73074930:73078024:73078124	812	78	1132	21	890	1153
39794	ENSMUSG00000037020	Wdr62	chr7	-	39794	104,92,57,85,76	20,26,19,15,18	120,57,95,64,162	7,17,4,9,15	187	122	0.000364023	0.00916385	0.772,0.698,0.662,0.787,0.734	0.918,0.686,0.939,0.823,0.876	-0.118	SE	chr7:30244472:30244538:30243832:30243960:30245286:30245505	414	98	498	52	512	550
3312	ENSMUSG00000041459	Tardbp	chr4	-	3312	153,115,89,70,105	9,27,24,18,2	101,84,127,79,120	0,9,5,3,0	148	122	2.87971e-08	3.09307e-06	0.933,0.778,0.754,0.762,0.977	1.0,0.885,0.954,0.956,1.0	-0.118	A5SS	chr4:148618646:148618791:148618673:148618791:148617565:148617635	532	80	511	17	612	528
8732	ENSMUSG00000033793	Atp6v1h	chr1	+	8732	841971820856710	121,96,90,84,85	9.50101e+18	18,13,15,28,19	175	122	0	0	0.829,0.876,0.864,0.877,0.853	0.974,0.982,0.983,0.965,0.979	-0.117	SE	chr1:5101069:5101123:5098028:5098133:5117389:5117487	4198	476	5589	93	4674	5682
35275	ENSMUSG00000029254	Stap1	chr5	+	35275	380393258359358	33,43,57,60,50	496490628512598	46,23,32,22,29	235	122	2.69311e-11	2.89557e-09	0.857,0.826,0.701,0.756,0.788	0.848,0.917,0.911,0.924,0.915	-0.117	SE	chr5:86081166:86081280:86077988:86078060:86084388:86084445	1748	243	2724	152	1991	2876
5286	ENSMUSG00000036503	Rnf13	chr3	+	5286	0,9,11,9,6	27,23,17,55,37	13,9,34,16,7	14,21,33,34,25	244	122	0.000337152	0.00959308	0.0,0.164,0.244,0.076,0.075	0.317,0.176,0.34,0.19,0.123	-0.117	A3SS	chr3:57801717:57802537:57802446:57802537:57796197:57796295	35	159	79	127	194	206
7580	ENSMUSG00000037234	Hook3	chr8	-	7580	15,29,14,16,15	6,0,1,9,0	16,24,31,20,17	0,0,2,0,3	156	122	0.000612296	0.0140662	0.662,1.0,0.916,0.582,1.0	1.0,1.0,0.924,1.0,0.816	-0.116	SE	chr8:26044239:26044274:26039668:26039751:26059239:26059380	89	16	108	5	105	113
1517	ENSMUSG00000004815	Dgkq	chr5	-	1517	41,45,62,42,49	0,2,9,6,14	21,60,26,37,17	0,0,0,1,3	244	122	3.15713e-06	0.000177626	1.0,0.918,0.775,0.778,0.636	1.0,1.0,1.0,0.949,0.739	-0.116	A5SS	chr5:108653635:108653786:108653771:108653786:108653180:108653219	239	31	161	4	270	165
13922	ENSMUSG00000038909	Kat7	chr11	-	13922	586561532686670	207240173228147	664658828702874	135160122130148	211	122	1.99052e-08	1.49568e-06	0.621,0.575,0.64,0.635,0.725	0.74,0.704,0.797,0.757,0.773	-0.115	SE	chr11:95291519:95291609:95289771:95289870:95294562:95294645	3035	995	3726	695	4030	4421
15956	ENSMUSG00000029470	P2rx4	chr5	+	15956	24,53,49,51,66	6,11,6,3,12	57,125,75,76,55	4,5,2,3,8	202	122	0.00056879	0.0132275	0.707,0.744,0.831,0.911,0.769	0.896,0.938,0.958,0.939,0.806	-0.115	SE	chr5:122724593:122724674:122719129:122719226:122724989:122725131	243	38	388	22	281	410
19505	ENSMUSG00000032468	Armc8	chr9	-	19505	168150144125144	18,15,12,10,4	143189149179167	0,0,0,0,0	203	122	0	0	0.849,0.857,0.878,0.883,0.956	1.0,1.0,1.0,1.0,1.0	-0.115	SE	chr9:99505264:99505346:99502511:99502598:99520486:99520582	731	59	827	0	790	827
63	ENSMUSG00000002546	Golga2	chr2	+	63	109,44,86,80,63	8,4,18,7,1	24,34,54,49,63	0,0,4,0,0	217	122	1.4466e-07	9.31697e-06	0.885,0.861,0.729,0.865,0.973	1.0,1.0,0.884,1.0,1.0	-0.114	SE	chr2:32296625:32296721:32293314:32293395:32296964:32297008	382	38	224	4	420	228
15649	ENSMUSG00000026767	Mindy3	chr2	-	15649	73,51,70,60,31	14,3,3,10,8	116101132106133	4,2,2,10,7	192	122	0.000114728	0.00349538	0.768,0.915,0.937,0.792,0.711	0.949,0.97,0.977,0.871,0.924	-0.114	SE	chr2:12386608:12386679:12364446:12364519:12396178:12396258	285	38	588	25	323	613
102	ENSMUSG00000000838	Fmr1	chrX	+	102	79,55,62,65,79	6,3,11,7,16	73,42,87,44,94	0,4,0,3,0	196	122	1.04456e-08	1.72135e-06	0.891,0.919,0.778,0.853,0.755	1.0,0.867,1.0,0.901,1.0	-0.114	A3SS	chrX:68712230:68712413:68712305:68712413:68708041:68708128	340	43	340	7	383	347
14954	ENSMUSG00000026414	Tnnt2	chr1	+	14954	0,0,0,0,0	17,12,11,17,18	2,5,1,1,2	10,15,32,20,9	151	122	0.00114922	0.0239305	0.0,0.0,0.0,0.0,0.0	0.139,0.212,0.025,0.039,0.152	-0.113	SE	chr1:135843784:135843814:135841900:135841911:135845554:135845644	0	75	11	86	75	97
24921	ENSMUSG00000037849	Ifi206	chr1	-	24921	237200138146110	31,16,23,18,19	131190207233167	4,5,7,21,13	228	122	1.71559e-06	8.72618e-05	0.804,0.87,0.762,0.813,0.756	0.946,0.953,0.941,0.856,0.873	-0.113	SE	chr1:173485528:173485635:173480370:173482056:173486607:173486892	831	107	928	50	938	978
41548	ENSMUSG00000074829	2010315B03Rik	chr9	-	41548	5,2,1,4,3	13,22,22,13,28	13,8,6,18,7	29,23,33,22,17	184	122	0.000646107	0.0146898	0.203,0.057,0.029,0.169,0.066	0.229,0.187,0.108,0.352,0.214	-0.113	SE	chr9:124304655:124304718:124295357:124295484:124311675:124311899	15	98	52	124	113	176
5009	ENSMUSG00000037773	Pced1a	chr2	-	5009	37,30,25,27,26	0,1,0,2,14	34,55,78,49,28	2,0,0,1,0	244	122	0.000124741	0.00429	1.0,0.937,1.0,0.871,0.481	0.895,1.0,1.0,0.961,1.0	-0.113	A3SS	chr2:130422224:130422704:130422224:130422375:130422812:130422892	145	17	244	3	162	247
614	ENSMUSG00000000838	Fmr1	chrX	+	614	219176179169212	176181238152195	237124284230290	204,55,220,125,168	184	122	0.000350476	0.00885656	0.452,0.392,0.333,0.424,0.419	0.435,0.599,0.461,0.55,0.534	-0.112	SE	chrX:68705860:68705923:68705248:68705380:68708041:68708128	955	942	1165	772	1897	1937
35801	ENSMUSG00000001017	Chtop	chr3	-	35801	1.33813e+19	186157147183137	1.56916e+19	76,83,89,57,58	244	122	0	0	0.782,0.81,0.816,0.795,0.843	0.912,0.906,0.908,0.94,0.938	-0.112	SE	chr3:90502115:90502253:90498955:90500107:90503095:90503282	6872	810	8467	363	7682	8830
47576	ENSMUSG00000038685	Rtel1	chr2	+	47576	109,67,86,94,93	6,14,10,16,7	119,143,120,75,136	5,6,14,0,4	238	122	0.000470204	0.011265	0.903,0.71,0.815,0.751,0.872	0.924,0.924,0.815,1.0,0.946	-0.112	SE	chr2:181355008:181355125:181354352:181354442:181355309:181355552	449	53	593	29	502	622
3441	ENSMUSG00000038671	Arfrp1	chr2	-	3441	432447389468415	98,55,102,72,90	391475616431479	32,54,69,41,46	244	122	1.1208e-07	9.45876e-06	0.688,0.803,0.656,0.765,0.697	0.859,0.815,0.817,0.84,0.839	-0.112	A5SS	chr2:181361000:181361472:181361390:181361472:181359638:181359739	2151	417	2392	242	2568	2634
41989	ENSMUSG00000092203	1110038B12Rik	chr17	-	41989	177191202157200	38,24,44,38,33	158248245208247	25,33,29,10,13	244	122	6.23593e-05	0.00207033	0.7,0.799,0.697,0.674,0.752	0.76,0.79,0.809,0.912,0.905	-0.111	SE	chr17:34950697:34950847:34950240:34950475:34951884:34951925	927	177	1106	110	1104	1216
1193	ENSMUSG00000039382	Wdr45	chrX	+	1193	67,59,75,62,48	11,7,11,12,16	75,82,79,62,89	10,3,4,2,8	151	122	6.53864e-05	0.00272214	0.831,0.872,0.846,0.807,0.708	0.858,0.957,0.941,0.962,0.9	-0.111	A3SS	chrX:7727181:7727271:7727211:7727271:7726877:7727086	311	57	387	27	368	414
7723	ENSMUSG00000034987	Hrh2	chr13	+	7723	13,13,23,15,29	2,0,0,1,7	10,20,23,15,27	0,0,0,0,2	244	122	0.000596041	0.0137484	0.765,1.0,1.0,0.882,0.674	1.0,1.0,1.0,1.0,0.871	-0.11	SE	chr13:54222876:54223021:54214006:54215079:54233179:54236180	93	10	95	2	103	97
35122	ENSMUSG00000021224	Numb	chr12	-	35122	19,4,9,7,13	58,54,72,48,55	10,44,24,18,33	38,43,88,54,52	244	122	1.70924e-05	0.000664828	0.141,0.036,0.059,0.068,0.106	0.116,0.338,0.12,0.143,0.241	-0.11	SE	chr12:83797196:83797343:83794035:83796154:83799507:83799523	52	287	129	275	339	404
38496	ENSMUSG00000028759	Hp1bp3	chr4	+	38496	69,70,86,81,113	15,6,10,20,14	56,67,91,111,87	2,10,7,2,8	244	122	0.00160144	0.0317837	0.697,0.854,0.811,0.669,0.801	0.933,0.77,0.867,0.965,0.845	-0.11	SE	chr4:138221525:138221718:138217267:138217294:138222088:138222188	419	65	412	29	484	441
39923	ENSMUSG00000002617	Zfp40	chr17	-	39923	45,34,20,25,55	8,3,0,2,0	47,44,57,47,50	0,0,0,0,0	244	122	1.36487e-05	0.000546418	0.738,0.85,1.0,0.862,1.0	1.0,1.0,1.0,1.0,1.0	-0.11	SE	chr17:23191676:23191802:23191344:23191435:23193074:23193251	179	13	245	0	192	245
48400	ENSMUSG00000059208	Hnrnpm	chr17	-	48400	429493402440372	40,56,65,45,54	438537503477495	1,3,7,0,11	136	122	0	0	0.906,0.888,0.847,0.898,0.861	0.997,0.994,0.985,1.0,0.976	-0.11	SE	chr17:33658899:33658914:33658387:33658465:33660212:33660314	2136	260	2450	22	2396	2472
5717	ENSMUSG00000031903	Pla2g15	chr8	+	5717	129,57,127,81,97	13,13,8,10,7	125,125,88,131,159	7,8,4,0,6	244	122	0.000126961	0.00432871	0.832,0.687,0.888,0.802,0.874	0.899,0.887,0.917,1.0,0.93	-0.11	A3SS	chr8:106161083:106161308:106161208:106161308:106160580:106160679	491	51	628	25	542	653
14358	ENSMUSG00000030960	Eef1akmt2	chr7	-	14358	125,167,80,127,122	19,17,6,9,16	115187165217171	12,10,2,0,0	229	122	2.87046e-08	2.12468e-06	0.778,0.84,0.877,0.883,0.802	0.836,0.909,0.978,1.0,1.0	-0.109	SE	chr7:132837099:132837207:132827780:132827882:132850590:132850709	621	67	855	24	688	879
27473	ENSMUSG00000068264	Ap5s1	chr2	+	27473	129104125155177	37,32,42,36,23	128158141140136	22,22,22,18,18	244	122	0.00153017	0.0305525	0.635,0.619,0.598,0.683,0.794	0.744,0.782,0.762,0.795,0.791	-0.109	SE	chr2:131211262:131211473:131210423:131210681:131212446:131212736	690	170	703	102	860	805
125	ENSMUSG00000072501	Phf20l1	chr15	+	125	219169177251177	83,68,87,104,108	204172240195214	68,44,70,64,50	211	122	7.08304e-05	0.00230716	0.604,0.59,0.541,0.583,0.487	0.634,0.693,0.665,0.638,0.712	-0.107	SE	chr15:66597664:66597754:66597358:66597447:66604026:66604240	993	450	1025	296	1443	1321
8285	ENSMUSG00000022677	Fopnl	chr16	-	8285	207224153169173	23,25,19,26,27	242309245324267	0,24,14,15,16	206	122	7.27593e-09	5.81986e-07	0.842,0.841,0.827,0.794,0.791	1.0,0.884,0.912,0.927,0.908	-0.107	SE	chr16:14311046:14311131:14299243:14300209:14313815:14314013	926	120	1387	69	1046	1456
9318	ENSMUSG00000034333	Zbed4	chr15	+	9318	53,18,76,59,61	10,0,1,3,5	42,29,69,50,43	0,0,0,0,0	244	122	9.82355e-08	6.58344e-06	0.726,1.0,0.974,0.908,0.859	1.0,1.0,1.0,1.0,1.0	-0.107	SE	chr15:88754759:88754933:88751659:88751802:88779408:88784516	267	19	233	0	286	233
40231	ENSMUSG00000039671	Zmynd8	chr2	-	40231	110,123,129,93,143	38,32,55,38,52	139152137114143	45,22,32,19,36	205	122	0.00160864	0.0318627	0.633,0.696,0.583,0.593,0.621	0.648,0.804,0.718,0.781,0.703	-0.106	SE	chr2:165787163:165787247:165784151:165785738:165791904:165791971	598	215	685	154	813	839
40695	ENSMUSG00000016487	Ppfibp1	chr6	+	40695	0,0,2,0,1	23,37,49,42,35	1,4,3,6,0	25,21,46,8,28	154	122	0.000343352	0.00872096	0.0,0.0,0.031,0.0,0.022	0.031,0.131,0.049,0.373,0.0	-0.106	SE	chr6:147016860:147016893:147016221:147016393:147019033:147019181	3	186	14	128	189	142
11	ENSMUSG00000026269	Rnpepl1	chr1	+	11	231199211256222	23,18,25,10,15	141203230201211	1,8,3,7,0	244	122	8.49996e-11	8.51584e-09	0.834,0.847,0.808,0.928,0.881	0.986,0.927,0.975,0.935,1.0	-0.105	SE	chr1:92915823:92915965:92915058:92915199:92916354:92916471	1119	91	986	19	1210	1005
11761	ENSMUSG00000005583	Mef2c	chr13	+	11761	255142178202199	140,79,100,106,92	223223299247257	117,48,83,96,89	181	122	0.000638667	0.0145373	0.551,0.548,0.545,0.562,0.593	0.562,0.758,0.708,0.634,0.661	-0.105	SE	chr13:83625264:83625324:83592777:83592981:83625469:83625607	976	517	1249	433	1493	1682
27516	ENSMUSG00000059263	Usp47	chr7	+	27516	39,29,37,25,56	199128148158177	53,54,62,67,85	176,96,197,86,196	181	122	5.98569e-06	0.000261826	0.117,0.132,0.144,0.096,0.176	0.169,0.275,0.175,0.344,0.226	-0.105	SE	chr7:112080171:112080231:112077791:112077959:112082429:112082561	186	810	321	751	996	1072
43332	ENSMUSG00000032503	Arpp21	chr9	-	43332	129115146140125	126169154159156	156127134163171	104,123,80,156,104	220	122	0.000118698	0.00359757	0.362,0.274,0.345,0.328,0.308	0.454,0.364,0.482,0.367,0.477	-0.105	SE	chr9:112155417:112155516:112149334:112149372:112157689:112157798	655	764	751	567	1419	1318
3957	ENSMUSG00000029655	N4bp2l2	chr5	-	3957	361353336340327	73,45,47,29,30	417464461416410	23,24,12,22,15	198	122	8.87068e-14	1.23486e-11	0.753,0.829,0.815,0.878,0.87	0.918,0.923,0.959,0.921,0.944	-0.104	SE	chr5:150647000:150647077:150635971:150643315:150647459:150647519	1717	224	2168	96	1941	2264
8964	ENSMUSG00000056268	Dennd1b	chr1	+	8964	0,0,9,4,0	70,27,40,46,31	8,8,3,11,5	37,16,35,35,31	181	122	2.1991e-05	0.000830923	0.0,0.0,0.132,0.055,0.0	0.127,0.252,0.055,0.175,0.098	-0.104	SE	chr1:139059066:139059126:139054540:139054621:139060274:139060328	13	214	35	154	227	189
25610	ENSMUSG00000021288	Klc1	chr12	+	25610	15,5,9,3,10	58,54,54,51,53	12,11,4,21,6	20,30,42,39,23	172	122	0.00254774	0.0463028	0.155,0.062,0.106,0.04,0.118	0.299,0.206,0.063,0.276,0.156	-0.104	SE	chr12:111793648:111793699:111789324:111789459:111795547:111795678	42	270	54	154	312	208
32002	ENSMUSG00000030126	Tmcc1	chr6	-	32002	0,0,1,0,4	18,19,31,13,17	0,3,6,0,5	8,3,16,24,14	244	122	0.000624351	0.0142523	0.0,0.0,0.016,0.0,0.105	0.0,0.333,0.158,0.0,0.152	-0.104	SE	chr6:116107311:116107516:116043767:116043805:116133766:116133903	5	98	14	65	103	79
17598	ENSMUSG00000026222	Sp100	chr1	+	17598	206142151149157	23,19,25,30,34	216236262207256	18,27,9,9,16	175	122	3.64679e-08	2.63538e-06	0.862,0.839,0.808,0.776,0.763	0.893,0.859,0.953,0.941,0.918	-0.103	SE	chr1:85681085:85681139:85679058:85679109:85694258:85694309	805	131	1177	79	936	1256
2208	ENSMUSG00000028034	Fubp1	chr3	+	2208	46,60,53,69,65	5,10,18,4,13	77,73,85,67,61	1,20,0,0,0	130	122	3.05058e-05	0.00101528	0.896,0.849,0.734,0.942,0.824	0.986,0.774,1.0,1.0,1.0	-0.103	A5SS	chr3:152226079:152226217:152226079:152226208:152231876:152232022	293	50	363	21	343	384
3093	ENSMUSG00000024908	Ppp6r3	chr19	-	3093	135,68,113,89,71	13,2,16,6,13	88,79,115,69,131	3,2,2,0,0	172	122	7.2397e-11	1.78956e-08	0.88,0.96,0.834,0.913,0.795	0.954,0.966,0.976,1.0,1.0	-0.103	A3SS	chr19:3473768:3473866:3473768:3473815:3484830:3484916	476	50	482	7	526	489
9516	ENSMUSG00000025026	Add3	chr19	+	9516	278259207280268	132111146177151	281350325268305	109,98,109,106,134	217	122	8.41116e-05	0.0026675	0.542,0.567,0.444,0.471,0.499	0.592,0.668,0.626,0.587,0.561	-0.102	SE	chr19:53244309:53244405:53242503:53242627:53244997:53247399	1292	717	1529	556	2009	2085
15249	ENSMUSG00000000827	Tpd52l2	chr2	+	15249	1.00396e+16	191172181185176	9.79117e+17	79,94,109,109,111	181	122	0	0	0.78,0.791,0.743,0.794,0.784	0.893,0.893,0.874,0.886,0.855	-0.102	SE	chr2:181502875:181502935:181501904:181502053:181508165:181508267	4745	905	5493	502	5650	5995
25202	ENSMUSG00000038301	Snx10	chr6	+	25202	83,45,77,85,95	5,8,10,11,10	70,80,122,72,65	0,5,4,2,8	230	122	0.000801933	0.0176168	0.898,0.749,0.803,0.804,0.834	1.0,0.895,0.942,0.95,0.812	-0.102	SE	chr6:51544540:51544649:51523981:51524034:51562017:51562064	385	44	409	19	429	428
25327	ENSMUSG00000040813	Tex264	chr9	-	25327	144121120135135	9,10,10,15,14	103191185167153	0,3,3,11,5	244	122	8.77153e-07	4.75412e-05	0.889,0.858,0.857,0.818,0.828	1.0,0.97,0.969,0.884,0.939	-0.102	SE	chr9:106681867:106682163:106673516:106673738:106684928:106684995	655	58	799	22	713	821
26588	ENSMUSG00000040483	Xaf1	chr11	+	26588	362399306236241	140122144130102	297386325417296	98,107,105,111,53	210	122	0.000241926	0.00652049	0.6,0.655,0.552,0.513,0.579	0.638,0.677,0.643,0.686,0.764	-0.102	SE	chr11:72306563:72306652:72303326:72303462:72308606:72308749	1544	638	1721	474	2182	2195
45038	ENSMUSG00000010608	Rbm25	chr12	+	45038	13,19,14,15,19	47,56,52,41,33	30,20,34,36,16	30,53,60,50,19	244	122	0.00129341	0.0263828	0.121,0.145,0.119,0.155,0.224	0.333,0.159,0.221,0.265,0.296	-0.102	SE	chr12:83639127:83639375:83632305:83632417:83642401:83642519	80	229	136	212	309	348
2720	ENSMUSG00000045078	Rnf216	chr5	-	2720	118,41,84,85,71	142,77,113,125,88	104,84,162,93,149	103,104,117,70,114	244	122	0.000111477	0.00400913	0.294,0.21,0.271,0.254,0.287	0.335,0.288,0.409,0.399,0.395	-0.102	A3SS	chr5:143090119:143090929:143090119:143090758:143092994:143093125	399	545	592	508	944	1100
4001	ENSMUSG00000060550	H2-Q7	chr17	+	4001	357303206230357	524362383514449	395502466415291	407396477320348	244	122	1.2415e-07	8.12792e-06	0.254,0.295,0.212,0.183,0.284	0.327,0.388,0.328,0.393,0.295	-0.101	SE	chr17:35442266:35442551:35439908:35440184:35442966:35442999	1453	2232	2069	1948	3685	4017
23667	ENSMUSG00000038425	Poli	chr18	-	23667	65,56,81,84,57	7,0,1,4,8	54,79,76,61,75	0,0,0,0,0	244	122	7.46109e-08	5.09746e-06	0.823,1.0,0.976,0.913,0.781	1.0,1.0,1.0,1.0,1.0	-0.101	SE	chr18:70528701:70528827:70526556:70526721:70529750:70530138	343	20	345	0	363	345
26582	ENSMUSG00000055531	Cpsf6	chr10	-	26582	231161203213198	8.43799e+15	329493431379390	6.6392e+15	232	122	0	0	0.126,0.096,0.106,0.092,0.1	0.207,0.22,0.179,0.208,0.211	-0.101	SE	chr10:117361773:117361884:117360855:117361360:117362013:117362187	1006	4589	2022	4150	5595	6172
26587	ENSMUSG00000040483	Xaf1	chr11	+	26587	270258205205201	140122144130102	242235248312206	98,107,105,111,53	244	122	0.000432146	0.0105184	0.491,0.514,0.416,0.441,0.496	0.553,0.523,0.541,0.584,0.66	-0.101	SE	chr11:72304665:72304861:72303326:72303462:72308606:72308924	1139	638	1243	474	1777	1717
29485	ENSMUSG00000035824	Tk2	chr8	-	29485	14,15,17,20,29	1,3,2,8,4	13,9,11,8,16	2,0,0,2,0	159	122	0.000133355	0.00394535	0.915,0.793,0.867,0.657,0.848	0.833,1.0,1.0,0.754,1.0	-0.101	SE	chr8:104247646:104247684:104243384:104243459:104248025:104248532	95	18	57	4	113	61
40334	ENSMUSG00000019710	Mrpl24	chr3	+	40334	67,109,95,87,79	97107116128113	114202133121105	92137115115108	147	122	0.000189215	0.0052979	0.364,0.458,0.405,0.361,0.367	0.507,0.55,0.49,0.466,0.447	-0.101	SE	chr3:87919802:87919828:87919535:87919705:87921816:87922052	437	561	675	567	998	1242
43066	ENSMUSG00000041264	Uspl1	chr5	+	43066	140,98,141,156,143	68,62,91,78,75	118131178155147	35,65,67,54,51	244	122	0.000977446	0.0208602	0.507,0.441,0.437,0.5,0.488	0.628,0.502,0.571,0.589,0.59	-0.101	SE	chr5:149187707:149187876:149184559:149184806:149188344:149188473	678	374	729	272	1052	1001
45126	ENSMUSG00000031671	Setd6	chr8	+	45126	128140121123107	20,11,17,22,29	150200189156190	17,22,10,7,18	242	122	0.000925224	0.0199811	0.763,0.865,0.782,0.738,0.65	0.816,0.821,0.905,0.918,0.842	-0.101	SE	chr8:95716920:95717041:95716606:95716801:95718192:95718335	619	99	885	74	718	959
24720	ENSMUSG00000079557	March2	chr17	-	24720	61,39,60,66,56	58,62,82,82,87	48,79,82,69,59	53,62,60,66,39	241	122	0.000953863	0.0204339	0.347,0.242,0.27,0.289,0.246	0.314,0.392,0.409,0.346,0.434	-0.1	SE	chr17:33715942:33716062:33709744:33709972:33718545:33718591	282	371	337	280	653	617
39365	ENSMUSG00000030263	Lrmp	chr6	+	39365	3.43233e+19	472451581616489	3.56541e+19	228308291307277	244	122	0	0	0.784,0.785,0.748,0.746,0.798	0.887,0.869,0.875,0.861,0.87	-0.1	SE	chr6:145137459:145137607:145121738:145122106:145147635:145147682	17676	2609	19280	1411	20285	20691
7341	ENSMUSG00000022092	Ppp3cc	chr14	-	7341	47,89,65,92,57	439442392438365	15,13,20,16,12	509544636593629	148	122	0	0	0.081,0.142,0.12,0.148,0.114	0.024,0.019,0.025,0.022,0.015	0.1	SE	chr14:70225927:70225954:70224966:70225048:70235139:70235208	350	2076	76	2911	2426	2987
13289	ENSMUSG00000011158	Brf1	chr12	-	13289	76,70,92,90,63	4,0,4,0,7	76,91,50,68,68	22,0,12,11,4	153	122	2.73953e-05	0.00100451	0.938,1.0,0.948,1.0,0.878	0.734,1.0,0.769,0.831,0.931	0.1	SE	chr12:112983026:112983058:112979684:112979757:112983732:112983849	391	15	353	49	406	402
29500	ENSMUSG00000026565	Pou2f1	chr1	-	29500	35,37,43,64,34	48,43,85,86,69	11,24,39,18,14	33,53,81,56,44	193	122	0.00187732	0.0361207	0.316,0.352,0.242,0.32,0.238	0.174,0.223,0.233,0.169,0.167	0.1	SE	chr1:165883046:165883118:165880129:165880475:165891809:165891915	213	331	106	267	544	373
34651	ENSMUSG00000036810	Cnep1r1	chr8	+	34651	84,84,87,85,117	1,5,4,5,7	91,104,85,91,84	2,12,21,11,14	195	122	0.00010223	0.00316618	0.981,0.913,0.932,0.914,0.913	0.966,0.844,0.717,0.838,0.79	0.1	SE	chr8:88125081:88125155:88119779:88119851:88133787:88134480	457	22	455	60	479	515
37070	ENSMUSG00000022749	Tbc1d23	chr16	-	37070	45,21,20,18,11	0,1,2,0,0	27,47,23,21,46	10,3,0,2,6	166	122	5.35096e-06	0.00023961	1.0,0.939,0.88,1.0,1.0	0.665,0.92,1.0,0.885,0.849	0.1	SE	chr16:57181491:57181536:57177931:57178020:57182850:57182990	115	3	164	21	118	185
2261	ENSMUSG00000047153	Khnyn	chr14	+	2261	13,7,35,20,23	81,49,80,64,71	8,5,12,2,3	80,84,65,48,77	181	122	3.23801e-08	3.3267e-06	0.098,0.088,0.228,0.174,0.179	0.063,0.039,0.111,0.027,0.026	0.1	A5SS	chr14:55893991:55894159:55893991:55894099:55894286:55894388	98	345	30	354	443	384
4651	ENSMUSG00000023942	Slc29a1	chr17	-	4651	558632538574601	76,95,70,110,48	485602595524471	121144125125111	222	122	8.06031e-08	5.4664e-06	0.801,0.785,0.809,0.741,0.873	0.688,0.697,0.723,0.697,0.7	0.101	SE	chr17:45593331:45593432:45592178:45592261:45595481:45595515	2903	399	2677	626	3302	3303
15452	ENSMUSG00000100280	Gm28417	chr1	-	15452	105,75,39,73,73	0,0,2,1,0	67,89,60,52,86	6,4,0,8,8	244	122	3.27704e-08	2.39877e-06	1.0,1.0,0.907,0.973,1.0	0.848,0.918,1.0,0.765,0.843	0.101	SE	chr1:34470639:34470873:34470154:34470368:34472811:34473148	365	3	354	26	368	380
2502	ENSMUSG00000073471	Rsph3a	chr17	+	2502	19,32,29,27,29	0,0,1,2,3	23,15,30,24,16	10,0,3,0,7	124	122	0.000348767	0.00704258	1.0,1.0,0.966,0.93,0.905	0.694,1.0,0.908,1.0,0.692	0.101	A5SS	chr17:7952548:7952636:7952548:7952633:7970146:7970288	136	6	108	20	142	128
2422	ENSMUSG00000079429	Mroh2a	chr1	+	2422	40,26,35,53,25	0,0,0,3,3	54,77,33,39,46	0,6,4,11,3	244	122	0.000583627	0.013525	1.0,1.0,1.0,0.898,0.806	1.0,0.865,0.805,0.639,0.885	0.102	SE	chr1:88257709:88257865:88256650:88256833:88259118:88259221	179	6	249	24	185	273
7223	ENSMUSG00000002107	Celf2	chr2	-	7223	1.70516e+19	186151205219161	1.02014e+19	165292212231265	244	122	4.59632e-14	6.67965e-12	0.821,0.84,0.808,0.824,0.84	0.756,0.698,0.738,0.737,0.696	0.102	SE	chr2:6549831:6549975:6546239:6547213:6553784:6553964	8760	922	6073	1165	9682	7238
12981	ENSMUSG00000036948	BC037034	chr5	-	12981	117160198219192	17,16,12,15,21	96,82,90,105,126	20,20,22,14,11	244	122	0.00138438	0.0280131	0.775,0.833,0.892,0.88,0.821	0.706,0.672,0.672,0.789,0.851	0.102	SE	chr5:138261552:138261716:138260834:138260989:138261801:138261884	886	81	499	87	967	586
25657	ENSMUSG00000029454	Mapkapk5	chr5	-	25657	168144125153122	3,0,1,2,2	113151182148115	6,16,14,4,11	244	122	1.42374e-10	1.40511e-08	0.966,1.0,0.984,0.975,0.968	0.904,0.825,0.867,0.949,0.839	0.102	SE	chr5:121535674:121535943:121534406:121534430:121537111:121537184	712	8	709	51	720	760
35819	ENSMUSG00000020454	Eif4enif1	chr11	+	35819	74,77,70,64,70	1,0,0,2,0	78,38,49,44,61	0,14,4,3,0	193	122	2.68237e-06	0.000129151	0.979,1.0,1.0,0.953,1.0	1.0,0.632,0.886,0.903,1.0	0.102	SE	chr11:3233987:3234059:3229868:3230101:3239400:3239459	355	3	270	21	358	291
41952	ENSMUSG00000000085	Scmh1	chr4	+	41952	209165223234249	55,51,55,81,47	234203211171216	73,85,102,76,87	244	122	0.000381349	0.00951549	0.655,0.618,0.67,0.591,0.726	0.616,0.544,0.508,0.529,0.554	0.102	SE	chr4:120462012:120462155:120453751:120453775:120463074:120463084	1080	289	1035	423	1369	1458
1088	ENSMUSG00000020359	Phykpl	chr11	+	1088	29,20,20,35,17	26,53,66,69,83	24,28,8,14,13	78,81,71,100,60	196	122	0.0039191	0.0341522	0.41,0.19,0.159,0.24,0.113	0.161,0.177,0.066,0.08,0.119	0.102	RI	chr11:51592005:51592285:51592005:51592093:51592168:51592285	121	297	87	390	418	477
4440	ENSMUSG00000040648	Ppip5k2	chr1	-	4440	59,65,60,90,91	125107115103102	57,25,57,53,58	124138143126206	241	122	5.76382e-07	3.28554e-05	0.193,0.235,0.209,0.307,0.311	0.189,0.084,0.168,0.176,0.125	0.103	SE	chr1:97717441:97717561:97713003:97713144:97719833:97719906	365	552	250	737	917	987
12711	ENSMUSG00000000340	Dbt	chr3	+	12711	18,22,28,24,36	0,0,0,0,0	25,21,59,34,39	2,7,2,0,0	197	122	0.00183993	0.0355219	1.0,1.0,1.0,1.0,1.0	0.886,0.65,0.948,1.0,1.0	0.103	SE	chr3:116523351:116523427:116513069:116513191:116533254:116533436	128	0	178	11	128	189
39622	ENSMUSG00000036109	Mbnl3	chrX	-	39622	200225216280294	22,34,29,55,29	127200172222158	41,52,27,45,38	244	122	0.000389861	0.00970349	0.82,0.768,0.788,0.718,0.835	0.608,0.658,0.761,0.712,0.675	0.103	SE	chrX:51164417:51164664:51139203:51139368:51205773:51205990	1215	169	879	203	1384	1082
2665	ENSMUSG00000034211	Mrps17	chr5	+	2665	200204152153172	41,27,34,40,54	159206243195157	55,59,91,91,61	175	122	9.16641e-05	0.00240669	0.773,0.84,0.757,0.727,0.689	0.668,0.709,0.651,0.599,0.642	0.103	A5SS	chr5:129715683:129715912:129715683:129715858:129716726:129716866	881	196	960	357	1077	1317
2261	ENSMUSG00000042570	Mier2	chr10	-	2261	33,8,45,17,42	50,33,45,46,60	17,7,26,8,11	48,53,44,53,62	244	122	0.000216332	0.00658149	0.248,0.108,0.333,0.156,0.259	0.15,0.062,0.228,0.07,0.081	0.103	A3SS	chr10:79549536:79549853:79549536:79549679:79550315:79550406	145	234	69	260	379	329
633	ENSMUSG00000012126	Ubxn11	chr4	+	633	45,36,30,24,43	32,37,33,33,37	10,27,47,33,29	56,81,46,38,33	244	122	0.00623134	0.0482681	0.413,0.327,0.313,0.267,0.368	0.082,0.143,0.338,0.303,0.305	0.103	RI	chr4:134123841:134124954:134123841:134123919:134124833:134124954	178	172	146	254	350	400
3165	ENSMUSG00000009995	Taz	chrX	+	3165	126,108,91,105,109	53,47,33,45,31	97,80,93,99,110	46,42,86,61,51	244	122	0.00510869	0.0410943	0.543,0.535,0.58,0.538,0.637	0.513,0.488,0.351,0.448,0.519	0.103	RI	chrX:74288177:74288513:74288177:74288219:74288447:74288513	539	209	479	286	748	765
1883	ENSMUSG00000058318	Phf21a	chr2	+	1883	0,0,2,1,9	27,19,15,25,10	0,2,0,0,0	14,24,17,16,5	136	122	0.00247546	0.0416615	0.0,0.0,0.107,0.035,0.447	0.0,0.07,0.0,0.0,0.0	0.104	A3SS	chr2:92215448:92215575:92215463:92215575:92214048:92214089	12	96	2	76	108	78
758	ENSMUSG00000011958	Bnip2	chr9	+	758	558502478491456	325222278194249	434439485452436	301378347303425	157	122	7.85557e-07	4.34069e-05	0.572,0.637,0.572,0.663,0.587	0.528,0.474,0.521,0.537,0.444	0.105	SE	chr9:70004305:70004341:70003568:70003667:70007063:70008317	2485	1268	2246	1754	3753	4000
47102	ENSMUSG00000021711	Trappc13	chr13	-	47102	591637419534354	440235292272247	334567404358501	338372495339388	139	122	0.00050828	0.0120319	0.541,0.704,0.557,0.633,0.557	0.464,0.572,0.417,0.481,0.531	0.105	SE	chr13:104152164:104152182:104150049:104150183:104154295:104154340	2535	1486	2164	1932	4021	4096
2056	ENSMUSG00000047767	Atg16l2	chr7	-	2056	47,39,76,106,113	169160172216180	22,12,26,35,29	213176171174174	244	122	3.33067e-16	8.74486e-14	0.122,0.109,0.181,0.197,0.239	0.049,0.033,0.071,0.091,0.077	0.105	A5SS	chr7:101291714:101291999:101291878:101291999:101291486:101291592	381	897	124	908	1278	1032
84	ENSMUSG00000026199	Ankzf1	chr1	+	84	50,68,73,26,36	53,67,58,59,42	41,40,50,42,34	53,85,86,133,83	244	122	0.000325112	0.00520179	0.321,0.337,0.386,0.181,0.3	0.279,0.19,0.225,0.136,0.17	0.105	RI	chr1:75195800:75196381:75195800:75195948:75196152:75196381	253	279	207	440	532	647
634	ENSMUSG00000033540	Idua	chr5	+	634	25,34,27,17,28	55,53,53,70,51	14,17,13,11,13	78,67,58,57,60	209	122	1.77336e-05	0.000494514	0.21,0.272,0.229,0.124,0.243	0.095,0.129,0.116,0.101,0.112	0.105	RI	chr5:108680110:108680497:108680110:108680206:108680294:108680497	131	282	68	320	413	388
3486	ENSMUSG00000008167	Fbxw9	chr8	+	3486	12,5,13,13,17	21,29,27,26,34	8,4,10,9,4	34,63,47,44,17	205	122	0.000154199	0.00287576	0.254,0.093,0.223,0.229,0.229	0.123,0.036,0.112,0.109,0.123	0.105	RI	chr8:85064383:85064672:85064383:85064496:85064580:85064672	60	137	35	205	197	240
23721	ENSMUSG00000004677	Myo9b	chr8	+	23721	34,8,50,28,42	36,19,60,38,43	23,20,15,12,16	37,38,27,46,60	211	122	0.000804553	0.0176626	0.353,0.196,0.325,0.299,0.361	0.264,0.233,0.243,0.131,0.134	0.106	SE	chr8:71336875:71336965:71334312:71334394:71338906:71339008	162	196	86	208	358	294
37915	ENSMUSG00000097290	1300002E11Rik	chr16	+	37915	3,17,12,25,23	2,0,1,1,0	12,10,30,19,20	10,4,5,0,0	244	122	0.000648326	0.0147318	0.429,1.0,0.857,0.926,1.0	0.375,0.556,0.75,1.0,1.0	0.106	SE	chr16:21802954:21803097:21801280:21801356:21806970:21807119	80	4	91	19	84	110
2737	ENSMUSG00000094870	Zfp131	chr13	-	2737	172147181124128	142,78,89,125,120	107101107115181	84184158143145	223	122	0.00461902	0.0385745	0.399,0.508,0.527,0.352,0.369	0.411,0.231,0.27,0.306,0.406	0.106	RI	chr13:119775766:119776449:119775766:119775989:119776091:119776449	752	554	611	714	1306	1325
13208	ENSMUSG00000023951	Vegfa	chr17	-	13208	280266336272210	73,61,101,104,71	245245230208187	61,130,133,121,87	244	122	0.00244494	0.0448039	0.657,0.686,0.625,0.567,0.597	0.668,0.485,0.464,0.462,0.518	0.107	SE	chr17:46020990:46021122:46016992:46018879:46024064:46024094	1364	410	1115	532	1774	1647
19716	ENSMUSG00000041890	Git2	chr5	-	19716	477389472587534	156139221178166	403448414457344	208240270218186	211	122	6.12468e-07	3.4614e-05	0.639,0.618,0.553,0.656,0.65	0.528,0.519,0.47,0.548,0.517	0.107	SE	chr5:114737347:114737437:114733860:114733943:114739032:114739281	2459	860	2066	1122	3319	3188
21661	ENSMUSG00000026987	Baz2b	chr2	-	21661	199167284257293	4,4,0,1,4	218196199244190	5,3,35,29,14	244	122	6.17728e-13	8.08836e-11	0.961,0.954,1.0,0.992,0.973	0.956,0.97,0.74,0.808,0.872	0.107	SE	chr2:59959820:59960105:59958431:59958492:59962020:59962630	1200	13	1047	86	1213	1133
30517	ENSMUSG00000028630	Dyrk2	chr10	-	30517	10,10,19,24,37	0,0,0,3,0	12,27,9,25,32	0,1,1,6,3	244	122	4.33635e-05	0.0015078	1.0,1.0,1.0,0.8,1.0	1.0,0.931,0.818,0.676,0.842	0.107	SE	chr10:118868149:118868298:118855602:118861153:118868720:118869149	100	3	105	11	103	116
2875	ENSMUSG00000026339	Ccdc93	chr1	+	2875	9,10,32,14,31	0,1,0,4,0	27,10,19,4,24	2,0,7,3,2	124	122	0.00102576	0.0219138	1.0,0.908,1.0,0.775,1.0	0.93,1.0,0.728,0.567,0.922	0.107	A3SS	chr1:121462232:121462283:121462235:121462283:121461886:121461979	96	5	84	14	101	98
16272	ENSMUSG00000042323	Pbrm1	chr14	+	16272	377196274333355	14,0,2,0,14	456443468433540	41,56,29,38,24	244	122	4.32987e-15	6.71028e-13	0.931,1.0,0.986,1.0,0.927	0.848,0.798,0.89,0.851,0.918	0.108	SE	chr14:31022719:31022859:31019137:31019293:31025497:31025650	1535	30	2340	188	1565	2528
19142	ENSMUSG00000035325	Sec31a	chr5	-	19142	346261290306288	29,16,33,17,26	252220312205282	40,48,46,27,67	199	122	5.82705e-09	4.72766e-07	0.88,0.909,0.843,0.917,0.872	0.794,0.738,0.806,0.823,0.721	0.108	SE	chr5:100388533:100388611:100386127:100386203:100390758:100390833	1491	121	1271	228	1612	1499
36035	ENSMUSG00000025036	Sfxn2	chr19	+	36035	63,54,77,109,60	3,0,0,1,0	77,73,113,80,77	4,9,5,6,9	220	122	9.45063e-09	7.40997e-07	0.921,1.0,1.0,0.984,1.0	0.914,0.818,0.926,0.881,0.826	0.108	SE	chr19:46585704:46585803:46582806:46582977:46587934:46588010	363	4	420	33	367	453
618	ENSMUSG00000022338	Eny2	chr15	+	618	608504549564484	0,134,118,123,148	435685672689573	159208231205164	193	122	4.37956e-05	0.00132678	1.0,0.704,0.746,0.743,0.674	0.634,0.676,0.648,0.68,0.688	0.108	A5SS	chr15:44428091:44428242:44428091:44428170:44429559:44429636	2709	523	3054	967	3232	4021
2623	ENSMUSG00000060601	Nr1h2	chr7	-	2623	260314330346352	174215231261264	202344331238191	226421266277239	130	122	1.96897e-06	0.000176984	0.584,0.578,0.573,0.554,0.556	0.456,0.434,0.539,0.446,0.429	0.108	A3SS	chr7:44551954:44552245:44551954:44552236:44552506:44552620	1602	1145	1306	1429	2747	2735
3780	ENSMUSG00000025507	Pidd1	chr7	-	3780	110131154183152	12,23,19,36,35	106,127,103,153,87	32,34,32,30,27	244	122	0.00291182	0.0268107	0.821,0.74,0.802,0.718,0.685	0.624,0.651,0.617,0.718,0.617	0.108	RI	chr7:141441172:141441529:141441172:141441316:141441474:141441529	730	125	576	155	855	731
2939	ENSMUSG00000036371	Serbp1	chr6	+	2939	3.45936e+19	3.27336e+19	2.06129e+19	3.28854e+19	166	122	2.57017e-13	7.81924e-11	0.437,0.423,0.404,0.401,0.416	0.315,0.285,0.318,0.309,0.308	0.109	A3SS	chr6:67272818:67272938:67272863:67272938:67272138:67272228	15950	16423	12987	21671	32373	34658
5089	ENSMUSG00000028152	Tspan5	chr3	+	5089	233156154222160	20,10,8,20,22	128118182135187	32,37,42,12,20	185	122	3.74733e-05	0.00178563	0.885,0.911,0.927,0.88,0.827	0.725,0.678,0.741,0.881,0.86	0.109	A3SS	chr3:138896788:138896914:138896852:138896914:138894347:138894518	925	80	750	143	1005	893
477	ENSMUSG00000040859	Bsdc1	chr4	+	477	67,26,59,43,63	0,0,0,0,1	48,41,23,36,53	1,1,3,7,0	244	122	0.0001688	0.00308904	1.0,1.0,1.0,1.0,0.969	0.96,0.953,0.793,0.72,1.0	0.109	RI	chr4:129465229:129466990:129465229:129465346:129466913:129466990	258	1	201	12	259	213
1855	ENSMUSG00000069793	Slfn9	chr11	-	1855	106,53,86,93,73	0,2,0,1,0	86,62,123,48,75	3,10,3,7,3	237	122	3.40177e-08	2.48548e-06	1.0,0.932,1.0,0.98,1.0	0.937,0.761,0.955,0.779,0.928	0.11	SE	chr11:82990941:82991057:82987238:82988308:82991587:82991829	411	3	394	26	414	420
30138	ENSMUSG00000030534	Vps33b	chr7	+	30138	74,139,81,104,72	2,0,4,1,1	80,71,85,86,93	4,15,12,18,0	171	122	1.33047e-09	1.16523e-07	0.964,1.0,0.935,0.987,0.981	0.935,0.772,0.835,0.773,1.0	0.11	SE	chr7:80276045:80276095:80274623:80274685:80279971:80280017	470	8	415	49	478	464
45246	ENSMUSG00000026200	Glb1l	chr1	-	45246	163,119,82,118,79	0,0,5,0,0	64,45,86,122,138	3,11,14,0,0	243	122	7.88827e-07	4.3527e-05	1.0,1.0,0.892,1.0,1.0	0.915,0.673,0.755,1.0,1.0	0.11	SE	chr1:75202186:75202308:75202049:75202090:75202407:75202466	561	5	455	28	566	483
48118	ENSMUSG00000025817	Nudt5	chr2	+	48118	48,91,46,58,52	50,55,41,44,43	35,85,57,59,60	53,106,71,61,80	130	122	0.00118845	0.0245704	0.474,0.608,0.513,0.553,0.532	0.383,0.429,0.43,0.476,0.413	0.11	SE	chr2:5866232:5866241:5864346:5864448:5866353:5866407	295	233	296	371	528	667
263	ENSMUSG00000038975	Rabggtb	chr3	-	263	147218170182135	107,76,54,48,55	113150220169171	89,139,124,83,88	137	122	0.00262971	0.0429815	0.55,0.719,0.737,0.772,0.686	0.531,0.49,0.612,0.645,0.634	0.11	A3SS	chr3:153908789:153908915:153908789:153908899:153909348:153909459	852	340	823	523	1192	1346
20735	ENSMUSG00000073563	Csnk1g3	chr18	+	20735	64,79,65,73,80	246168171166194	42,49,46,39,42	197250244224258	145	122	4.31843e-10	4.03128e-08	0.18,0.283,0.242,0.27,0.258	0.152,0.142,0.137,0.128,0.12	0.111	SE	chr18:53948644:53948668:53948047:53948154:53953244:53955684	361	945	218	1173	1306	1391
35292	ENSMUSG00000013629	Cad	chr5	+	35292	28,14,43,10,16	96,52,101,82,65	7,4,10,7,10	99,102,161,65,138	172	122	2.48535e-12	2.99707e-10	0.171,0.16,0.232,0.08,0.149	0.048,0.027,0.042,0.071,0.049	0.111	SE	chr5:31075470:31075521:31075088:31075185:31075808:31075853	111	396	38	565	507	603
47564	ENSMUSG00000038685	Rtel1	chr2	+	47564	37,25,30,16,43	83,63,70,103,95	2,12,12,9,8	93,76,130,54,149	241	122	3.88578e-15	6.04567e-13	0.184,0.167,0.178,0.073,0.186	0.011,0.074,0.045,0.078,0.026	0.111	SE	chr2:181338234:181338354:181335935:181336046:181339055:181339094	151	414	43	502	565	545
2424	ENSMUSG00000079429	Mroh2a	chr1	+	2424	33,24,34,47,44	0,0,0,3,3	46,72,40,34,61	0,6,4,11,3	244	122	0.000691658	0.0155296	1.0,1.0,1.0,0.887,0.88	1.0,0.857,0.833,0.607,0.91	0.112	SE	chr1:88258582:88258714:88256650:88256833:88259118:88259221	182	6	253	24	188	277
7302	ENSMUSG00000027371	Fahd2a	chr2	-	7302	127203178189222	0,0,0,2,2	170236118148110	6,8,12,8,14	244	122	5.57332e-14	8.04058e-12	1.0,1.0,1.0,0.979,0.982	0.934,0.937,0.831,0.902,0.797	0.112	SE	chr2:127441873:127442124:127440385:127440602:127444416:127444508	919	4	782	48	923	830
11924	ENSMUSG00000037013	Ss18	chr18	-	11924	387345418388489	397293390341312	350339357343350	451482571448502	214	122	2.81963e-09	2.37508e-07	0.357,0.402,0.379,0.393,0.472	0.307,0.286,0.263,0.304,0.284	0.112	SE	chr18:14637391:14637484:14636495:14636618:14640256:14640361	2027	1733	1739	2454	3760	4193
39620	ENSMUSG00000036109	Mbnl3	chrX	-	39620	83,83,77,114,66	415417371490454	3,3,21,5,30	458471421482467	157	122	0	0	0.135,0.134,0.139,0.153,0.102	0.005,0.005,0.037,0.008,0.048	0.112	SE	chrX:51126125:51126161:51123816:51123911:51128920:51128966	423	2147	62	2299	2570	2361
39864	ENSMUSG00000033386	Frrs1	chr3	+	39864	38,25,45,49,31	0,0,0,0,0	8,55,86,19,21	2,0,11,2,0	180	122	2.7373e-05	0.00100451	1.0,1.0,1.0,1.0,1.0	0.731,1.0,0.841,0.866,1.0	0.112	SE	chr3:116900952:116901011:116900603:116900701:116902313:116902457	188	0	189	15	188	204
43297	ENSMUSG00000036339	Tmem260	chr14	+	43297	16,1,9,3,21	34,36,36,40,37	1,0,0,0,0	38,31,47,36,53	244	122	5.05151e-14	7.31437e-12	0.19,0.014,0.111,0.036,0.221	0.013,0.0,0.0,0.0,0.0	0.112	SE	chr14:48455080:48455310:48451905:48452057:48472323:48472501	50	183	1	205	233	206
47998	ENSMUSG00000086316	Nbdy	chrX	+	47998	493406504515635	4,1,12,1,4	560555497702664	33,53,75,41,56	199	122	0	0	0.987,0.996,0.963,0.997,0.99	0.912,0.865,0.802,0.913,0.879	0.112	SE	chrX:153728861:153728939:153725704:153725841:153741039:153741084	2553	22	2978	258	2575	3236
396	ENSMUSG00000042198	Chchd7	chr4	+	396	105140149162160	7,11,15,19,13	128223137130112	13,42,20,29,28	244	122	0.000127563	0.00317296	0.882,0.864,0.832,0.81,0.86	0.831,0.726,0.774,0.691,0.667	0.112	A5SS	chr4:3938913:3939131:3938913:3938962:3939423:3939526	716	65	730	132	781	862
1556	ENSMUSG00000022353	Mtss1	chr15	-	1556	62,72,118,83,86	5,3,2,0,0	90,68,91,78,79	0,14,5,10,11	244	122	8.83195e-06	0.000373559	0.861,0.923,0.967,1.0,1.0	1.0,0.708,0.901,0.796,0.782	0.113	SE	chr15:58947325:58947520:58945845:58946019:58951469:58951680	421	10	406	40	431	446
27795	ENSMUSG00000047909	Ankrd16	chr2	+	27795	43,37,46,32,45	75,60,49,55,46	26,13,34,38,29	50,84,83,89,64	212	122	0.00012774	0.00380477	0.248,0.262,0.351,0.251,0.36	0.23,0.082,0.191,0.197,0.207	0.113	SE	chr2:11785169:11785260:11784292:11784452:11786223:11786302	203	285	140	370	488	510
37874	ENSMUSG00000029106	Add1	chr5	+	37874	199246241170219	179180220211256	161192166137186	279299245238253	158	122	2.84283e-06	0.000136216	0.462,0.513,0.458,0.384,0.398	0.308,0.331,0.343,0.308,0.362	0.113	SE	chr5:34629135:34629172:34628414:34628513:34630469:34632305	1075	1046	842	1314	2121	2156
1199	ENSMUSG00000001166	Oas1c	chr5	-	1199	8,14,9,0,5	27,11,15,26,23	0,5,7,5,5	34,40,26,51,33	231	122	0.0024591	0.0450012	0.135,0.402,0.241,0.0,0.103	0.0,0.062,0.124,0.049,0.074	0.114	SE	chr5:120806295:120806405:120805403:120805600:120807959:120808248	36	102	22	184	138	206
6168	ENSMUSG00000029128	Rab28	chr5	-	6168	141167139168137	524537521571445	23,44,54,28,15	562808712677508	216	122	0	0	0.132,0.149,0.131,0.142,0.148	0.023,0.03,0.041,0.023,0.016	0.114	SE	chr5:41626986:41627081:41624975:41625862:41633172:41633250	752	2598	164	3267	3350	3431
17166	ENSMUSG00000022094	Slc39a14	chr14	-	17166	26,11,19,26,14	0,0,3,0,1	17,19,15,11,7	3,1,5,0,1	219	122	0.0019138	0.0367336	1.0,1.0,0.779,1.0,0.886	0.759,0.914,0.626,1.0,0.796	0.114	SE	chr14:70331268:70331366:70318661:70318940:70351279:70351394	96	4	69	10	100	79
749	ENSMUSG00000079036	Alkbh1	chr12	-	749	282386314262263	93,119,99,137,56	214220355285241	145182117116135	176	122	0.00257061	0.0423616	0.678,0.692,0.687,0.57,0.765	0.506,0.456,0.678,0.63,0.553	0.114	A3SS	chr12:87431399:87431593:87431399:87431538:87434118:87434209	1507	504	1315	695	2011	2010
15	ENSMUSG00000038884	A230050P20Rik	chr9	+	15	99,83,119,104,116	73,79,87,94,80	77,50,66,72,88	76,105,126,85,91	244	122	5.81752e-05	0.00138485	0.404,0.344,0.406,0.356,0.42	0.336,0.192,0.208,0.298,0.326	0.114	RI	chr9:20869603:20871235:20869603:20869653:20871196:20871235	521	413	353	483	934	836
1202	ENSMUSG00000001248	Gramd1a	chr7	-	1202	348236339278330	117,87,111,126,84	294298353195238	124158139169149	244	122	0.000671446	0.00905988	0.598,0.576,0.604,0.525,0.663	0.542,0.485,0.559,0.366,0.444	0.114	RI	chr7:31134413:31135739:31134413:31134517:31135596:31135739	1531	525	1378	739	2056	2117
2695	ENSMUSG00000049076	Acap2	chr16	-	2695	50,22,31,18,39	132,84,141,117,134	0,0,0,0,10	107,91,125,55,146	226	122	0	0	0.17,0.124,0.106,0.077,0.136	0.0,0.0,0.0,0.0,0.036	0.115	SE	chr16:31107527:31107632:31107049:31107142:31108026:31108187	160	608	10	524	768	534
2703	ENSMUSG00000004207	Psap	chr10	+	2703	143150139126157	1.08892e+16	11,10,9,4,5	2.09717e+19	127	122	0	0	0.112,0.136,0.121,0.111,0.118	0.005,0.006,0.004,0.002,0.002	0.116	A3SS	chr10:60299091:60299229:60299097:60299229:60295945:60296002	715	5071	39	10380	5786	10419
4655	ENSMUSG00000023942	Slc29a1	chr17	-	4655	454491431450511	76,95,70,110,48	409477464401389	121144125125111	244	122	1.16693e-06	6.14015e-05	0.749,0.721,0.755,0.672,0.842	0.628,0.624,0.65,0.616,0.637	0.117	SE	chr17:45593331:45593563:45592178:45592261:45595481:45595541	2337	399	2140	626	2736	2766
9917	ENSMUSG00000001419	Mef2d	chr3	+	9917	39,12,18,25,39	120,79,138,168,151	11,2,3,5,3	138139156130126	142	122	0	0	0.218,0.115,0.101,0.113,0.182	0.064,0.012,0.016,0.032,0.02	0.117	SE	chr3:88161780:88161801:88161190:88161381:88162957:88163087	133	656	24	689	789	713
12753	ENSMUSG00000028923	Necap2	chr4	-	12753	44,82,66,93,85	174189182235204	39,37,66,47,44	474689499536491	236	122	0	0	0.116,0.183,0.158,0.17,0.177	0.041,0.027,0.064,0.043,0.044	0.117	SE	chr4:141071580:141071695:141070081:141070233:141072528:141072637	370	984	233	2689	1354	2922
12754	ENSMUSG00000028923	Necap2	chr4	-	12754	48,69,78,81,97	174189182235204	37,32,68,41,46	474689499536491	244	122	0	0	0.121,0.154,0.176,0.147,0.192	0.038,0.023,0.064,0.037,0.045	0.117	SE	chr4:141071580:141071717:141070055:141070233:141072528:141072637	373	984	224	2689	1357	2913
4618	ENSMUSG00000014668	Chfr	chr5	+	4618	3,3,5,2,0	14,10,4,15,25	0,0,0,1,2	14,10,20,19,16	244	122	0.00072275	0.0161273	0.097,0.13,0.385,0.063,0.0	0.0,0.0,0.0,0.026,0.059	0.118	SE	chr5:110136482:110136652:110136050:110136194:110140116:110140189	13	68	3	79	81	82
12780	ENSMUSG00000022552	Sharpin	chr15	-	12780	3,21,18,31,41	0,0,0,0,0	27,39,40,23,41	0,12,0,3,0	244	122	1.725e-05	0.0006703	1.0,1.0,1.0,1.0,1.0	1.0,0.619,1.0,0.793,1.0	0.118	SE	chr15:76347663:76347789:76347341:76347387:76347895:76348004	114	0	170	15	114	185
15621	ENSMUSG00000021000	Mia2	chr12	+	15621	46,62,55,83,37	168172155194152	45,42,25,39,41	258331345326275	148	122	5.55112e-16	9.17646e-14	0.184,0.229,0.226,0.261,0.167	0.126,0.095,0.056,0.09,0.109	0.118	SE	chr12:59146335:59146362:59144698:59144770:59146846:59146872	283	841	192	1535	1124	1727
32642	ENSMUSG00000032228	Tcf12	chr9	-	32642	129185158171226	155148187169152	153,94,180,109,130	221175217178264	193	122	5.92577e-06	0.000260065	0.345,0.441,0.348,0.39,0.485	0.304,0.253,0.344,0.279,0.237	0.118	SE	chr9:71868998:71869070:71868071:71868278:71870073:71870147	869	811	666	1055	1680	1721
37157	ENSMUSG00000056383	AI987944	chr7	-	37157	122,107,99,128,179	12,10,16,9,16	120,81,132,126,135	23,24,23,17,30	244	122	0.000179482	0.00506097	0.836,0.843,0.756,0.877,0.848	0.723,0.628,0.742,0.787,0.692	0.118	SE	chr7:41388107:41388255:41376745:41376872:41393226:41393379	635	63	594	117	698	711
44443	ENSMUSG00000030815	Phkg2	chr7	+	44443	91,91,81,113,71	0,1,1,0,0	52,61,49,59,39	8,5,8,5,1	176	122	3.29508e-11	3.49542e-09	1.0,0.984,0.983,1.0,1.0	0.818,0.894,0.809,0.891,0.964	0.118	SE	chr7:127577974:127578029:127577534:127577688:127579666:127579732	447	2	260	27	449	287
5198	ENSMUSG00000022550	Adck5	chr15	+	5198	51,48,46,83,51	5,14,3,4,2	43,102,63,109,58	19,23,17,21,12	126	122	8.00474e-05	0.0031038	0.908,0.769,0.937,0.953,0.961	0.687,0.811,0.782,0.834,0.824	0.118	A3SS	chr15:76593430:76593631:76593435:76593631:76593233:76593309	279	28	375	92	307	467
24199	ENSMUSG00000039108	Lsm14b	chr2	+	24199	9,15,14,25,14	13,28,29,36,50	2,12,4,1,2	7,27,18,16,44	238	122	0.000122076	0.00366911	0.262,0.215,0.198,0.263,0.126	0.128,0.186,0.102,0.031,0.023	0.119	SE	chr2:180028957:180029074:180027899:180028035:180031360:180031528	77	156	21	112	233	133
39426	ENSMUSG00000024002	Brd4	chr17	-	39426	274213272290314	114104141154170	215209206196124	131176184156118	244	122	5.90018e-07	3.35364e-05	0.546,0.506,0.491,0.485,0.48	0.451,0.373,0.359,0.386,0.344	0.119	SE	chr17:32253040:32253200:32229416:32229735:32284517:32284677	1363	683	950	765	2046	1715
1432	ENSMUSG00000005583	Mef2c	chr13	+	1432	479382433465464	159,98,144,149,150	358385484373382	193165251212194	217	122	1.1142e-08	1.76267e-06	0.629,0.687,0.628,0.637,0.635	0.51,0.567,0.52,0.497,0.525	0.119	A3SS	chr13:83662306:83662631:83662402:83662631:83656216:83656352	2223	700	1982	1015	2923	2997
2990	ENSMUSG00000024055	Cyp4f13	chr17	-	2990	24,18,18,30,26	0,0,1,0,0	38,29,40,20,24	5,6,5,0,0	244	122	4.82616e-07	2.79932e-05	1.0,1.0,0.9,1.0,1.0	0.792,0.707,0.8,1.0,1.0	0.12	SE	chr17:32946804:32947003:32939821:32941200:32947312:32947379	116	1	151	16	117	167
40133	ENSMUSG00000019027	Dnah1	chr14	-	40133	22,23,29,26,21	0,0,2,0,4	24,39,44,34,19	0,7,9,10,2	194	122	0.000149523	0.00434593	1.0,1.0,0.901,1.0,0.768	1.0,0.778,0.755,0.681,0.857	0.12	SE	chr14:31318808:31318881:31308799:31308957:31319724:31320046	121	6	160	28	127	188
5213	ENSMUSG00000037426	Depdc5	chr5	+	5213	27,26,29,17,32	63,36,50,34,63	15,7,17,13,14	41,39,67,40,47	148	122	0.0004468	0.0119221	0.261,0.373,0.323,0.292,0.295	0.232,0.129,0.173,0.211,0.197	0.12	A3SS	chr5:32937520:32937704:32937547:32937704:32933949:32934015	131	246	66	234	377	300
2902	ENSMUSG00000047115	Fam221a	chr6	+	2902	149190110135141	3,3,1,2,0	105137123118149	4,20,14,11,16	204	122	1.80966e-14	2.68901e-12	0.967,0.974,0.985,0.976,1.0	0.94,0.804,0.84,0.865,0.848	0.121	SE	chr6:49385372:49385455:49382962:49383079:49388816:49390539	725	9	632	65	734	697
43329	ENSMUSG00000032503	Arpp21	chr9	-	43329	24,19,29,49,50	1,3,0,4,0	37,40,30,48,19	0,4,10,3,11	159	122	0.000724021	0.0161375	0.948,0.829,1.0,0.904,1.0	1.0,0.885,0.697,0.925,0.57	0.121	SE	chr9:112149334:112149372:112147422:112147482:112176094:112176235	171	8	174	28	179	202
45747	ENSMUSG00000017119	Nbr1	chr11	+	45747	313157253285240	23,8,17,13,15	319174234171220	41,37,24,44,19	232	122	4.42691e-07	2.60197e-05	0.877,0.912,0.887,0.92,0.894	0.804,0.712,0.837,0.671,0.859	0.121	SE	chr11:101572461:101572572:101571901:101571977:101572807:101572972	1248	76	1118	165	1324	1283
3127	ENSMUSG00000021185	Dglucy	chr12	+	3127	8,17,12,16,20	37,28,34,35,31	1,0,15,3,21	34,44,43,29,38	178	122	0.00121394	0.0250133	0.129,0.294,0.195,0.239,0.307	0.02,0.0,0.193,0.066,0.275	0.122	SE	chr12:100787615:100787672:100779094:100779310:100829598:100829725	73	165	40	188	238	228
7452	ENSMUSG00000062866	Phactr2	chr10	-	7452	2,1,7,15,13	29,8,17,36,23	0,0,1,1,1	23,47,24,40,37	244	122	1.8735e-12	2.30176e-10	0.033,0.059,0.171,0.172,0.22	0.0,0.0,0.02,0.012,0.013	0.122	SE	chr10:13257576:13257816:13253341:13253879:13261765:13261924	38	113	3	171	151	174
18832	ENSMUSG00000027881	Prpf38b	chr3	-	18832	22,16,14,11,17	1,2,2,0,0	19,36,24,9,32	4,5,5,0,11	192	122	0.00011162	0.00341699	0.933,0.836,0.816,1.0,1.0	0.751,0.821,0.753,1.0,0.649	0.122	SE	chr3:108905917:108905988:108905110:108905334:108906071:108906125	80	5	120	25	85	145
26967	ENSMUSG00000026860	Sh3glb2	chr2	-	26967	67,95,68,114,65	157242247232194	35,55,47,61,32	193329269324225	136	122	2.47058e-12	2.98835e-10	0.277,0.26,0.198,0.306,0.231	0.14,0.13,0.135,0.144,0.113	0.122	SE	chr2:30346058:30346073:30345698:30345939:30346352:30346453	409	1072	230	1340	1481	1570
30580	ENSMUSG00000028459	Cd72	chr4	-	30580	1.01992e+17	40,54,34,33,55	9.56984e+15	177144121102129	211	122	0	0	0.936,0.908,0.938,0.947,0.916	0.757,0.798,0.832,0.841,0.807	0.122	SE	chr4:43453082:43453172:43452306:43452639:43454241:43454349	4868	216	4838	673	5084	5511
2911	ENSMUSG00000037020	Wdr62	chr7	-	2911	10,15,10,11,17	78,53,51,75,30	8,0,2,4,16	76,90,56,66,82	130	122	5.18383e-05	0.00150801	0.107,0.21,0.155,0.121,0.347	0.09,0.0,0.032,0.054,0.155	0.122	A5SS	chr7:30243033:30243141:30243042:30243141:30242745:30242877	63	287	30	370	350	400
7340	ENSMUSG00000022092	Ppp3cc	chr14	-	7340	500619554560419	0,0,6,5,11	425611572525500	60,36,77,76,76	151	122	0	0	1.0,1.0,0.987,0.989,0.969	0.851,0.932,0.857,0.848,0.842	0.123	SE	chr14:70220016:70220046:70217864:70218277:70224309:70224407	2652	22	2633	325	2674	2958
7343	ENSMUSG00000022092	Ppp3cc	chr14	-	7343	5,4,7,3,13	0,0,3,1,0	14,27,29,21,14	8,0,6,1,9	244	122	0.00171303	0.0335951	1.0,1.0,0.538,0.6,1.0	0.467,1.0,0.707,0.913,0.438	0.123	SE	chr14:70245852:70245992:70236477:70236603:70256359:70256471	32	4	105	24	36	129
24878	ENSMUSG00000071281	Zfp65	chr13	-	24878	1,4,7,4,3	22,8,14,8,16	0,0,5,0,0	17,6,15,10,11	220	122	0.000127108	0.00380023	0.025,0.217,0.217,0.217,0.094	0.0,0.0,0.156,0.0,0.0	0.123	SE	chr13:67721446:67721545:67710880:67711007:67724187:67724272	19	68	5	59	87	64
36125	ENSMUSG00000030269	Mtmr14	chr6	+	36125	611773674698744	77,102,91,57,81	597680676655579	146180119174109	244	122	1.99307e-12	2.44053e-10	0.799,0.791,0.787,0.86,0.821	0.672,0.654,0.74,0.653,0.726	0.123	SE	chr6:113277789:113277945:113270521:113270701:113280602:113280919	3500	408	3187	728	3908	3915
40052	ENSMUSG00000041769	Ppp2r2d	chr7	+	40052	1,5,3,9,3	8,24,25,8,14	2,0,0,0,0	9,27,11,11,10	218	122	9.10531e-07	4.91489e-05	0.065,0.104,0.063,0.386,0.107	0.111,0.0,0.0,0.0,0.0	0.123	SE	chr7:138865020:138865117:138848458:138848665:138868409:138868507	21	79	2	68	100	70
43374	ENSMUSG00000025404	R3hdm2	chr10	+	43374	9,10,6,17,10	34,16,37,28,23	2,6,4,5,6	20,29,32,45,34	184	122	0.000367734	0.00922217	0.149,0.293,0.097,0.287,0.224	0.062,0.121,0.077,0.069,0.105	0.123	SE	chr10:127481692:127481755:127476519:127476698:127483975:127484218	52	138	23	160	190	183
44760	ENSMUSG00000025217	Btrc	chr19	+	44760	89,69,103,78,110	3,5,7,12,2	91,80,56,93,62	13,7,20,11,10	229	122	0.000531786	0.0124546	0.94,0.88,0.887,0.776,0.967	0.789,0.859,0.599,0.818,0.768	0.123	SE	chr19:45423132:45423240:45363750:45363886:45456532:45456610	449	29	382	61	478	443
2881	ENSMUSG00000059995	Atxn7l3	chr11	-	2881	6,12,13,15,3	41,33,53,39,20	3,0,7,2,1	35,30,41,28,59	142	122	1.96028e-06	0.000176984	0.112,0.238,0.174,0.248,0.114	0.069,0.0,0.128,0.058,0.014	0.123	A3SS	chr11:102293275:102293342:102293275:102293321:102293645:102293668	49	186	13	193	235	206
4284	ENSMUSG00000039599	Fam149b	chr14	+	4284	31,27,30,48,21	1,0,0,0,0	33,44,38,43,23	0,4,12,0,4	190	122	3.21031e-07	1.94155e-05	0.952,1.0,1.0,1.0,1.0	1.0,0.876,0.67,1.0,0.787	0.124	SE	chr14:20381752:20381821:20378763:20378883:20382916:20383276	157	1	181	20	158	201
30426	ENSMUSG00000032812	Arap1	chr7	+	30426	196150237222247	37,25,26,35,19	161135181177240	34,49,72,43,71	154	122	1.22171e-08	9.39344e-07	0.808,0.826,0.878,0.834,0.911	0.79,0.686,0.666,0.765,0.728	0.124	SE	chr7:101404932:101404965:101404279:101404425:101408046:101408129	1052	142	894	269	1194	1163
2776	ENSMUSG00000039637	Coro7	chr16	-	2776	65,38,87,47,86	4,3,1,3,0	35,24,41,26,42	7,8,4,1,2	244	122	0.000535372	0.00753639	0.89,0.864,0.978,0.887,1.0	0.714,0.6,0.837,0.929,0.913	0.125	RI	chr16:4634298:4634907:4634298:4634430:4634761:4634907	323	11	168	22	334	190
11712	ENSMUSG00000073096	Lrrc61	chr6	+	11712	27,21,26,15,60	0,0,2,0,3	23,23,19,8,20	1,5,3,0,3	244	122	0.00023126	0.0062972	1.0,1.0,0.867,1.0,0.909	0.92,0.697,0.76,1.0,0.769	0.126	SE	chr6:48556954:48557094:48554828:48554961:48568136:48568221	149	5	93	12	154	105
26316	ENSMUSG00000033943	Mga	chr2	+	26316	24,2,22,6,8	1,1,2,0,1	15,11,16,18,6	0,2,6,3,5	238	122	0.001533	0.0305783	0.925,0.506,0.849,1.0,0.804	1.0,0.738,0.578,0.755,0.381	0.126	SE	chr2:119941728:119941845:119938638:119938786:119946171:119946460	62	5	66	16	67	82
1429	ENSMUSG00000036054	Sugp2	chr8	+	1429	32,23,36,24,12	32,30,32,26,27	13,22,3,20,21	31,36,60,43,38	244	122	0.000228818	0.00394105	0.333,0.277,0.36,0.316,0.182	0.173,0.234,0.024,0.189,0.216	0.126	RI	chr8:70260468:70261317:70260468:70260589:70261230:70261317	127	147	79	208	274	287
28219	ENSMUSG00000087177	E130307A14Rik	chr10	-	28219	32,44,41,85,26	6,0,0,2,0	35,36,42,51,34	0,2,4,9,13	244	122	0.000477842	0.0114204	0.727,1.0,1.0,0.955,1.0	1.0,0.9,0.84,0.739,0.567	0.127	SE	chr10:39639563:39639766:39622654:39622727:39640379:39640511	228	8	198	28	236	226
42171	ENSMUSG00000033083	Tbc1d4	chr14	-	42171	33,11,52,35,41	0,0,0,0,0	18,34,51,20,23	0,0,0,6,4	244	122	0.00146165	0.0293617	1.0,1.0,1.0,1.0,1.0	1.0,1.0,1.0,0.625,0.742	0.127	SE	chr14:101494345:101494478:101489511:101489622:101501011:101501108	172	0	146	10	172	156
1461	ENSMUSG00000024369	Nelfe	chr17	+	1461	73,117,86,102,83	29,33,37,37,19	77,79,87,60,87	27,54,46,49,46	244	122	0.00295957	0.0397356	0.557,0.639,0.537,0.58,0.686	0.588,0.422,0.486,0.38,0.486	0.127	A5SS	chr17:34850407:34850674:34850407:34850462:34850910:34850993	461	155	390	222	616	612
15050	ENSMUSG00000025085	Ablim1	chr19	-	15050	113,91,171,170,154	449316471507380	25,2,26,26,17	435421446491497	226	122	0	0	0.12,0.135,0.164,0.153,0.18	0.03,0.003,0.031,0.028,0.018	0.128	SE	chr19:57051129:57051234:57049461:57049509:57061252:57061382	699	2123	96	2290	2822	2386
15063	ENSMUSG00000116207	Nnt	chr13	-	15063	264265330334353	42,27,44,43,29	238398327288307	81,46,90,80,67	244	122	7.03786e-06	0.00030383	0.759,0.831,0.789,0.795,0.859	0.595,0.812,0.645,0.643,0.696	0.128	SE	chr13:119372395:119372591:119369911:119370145:119381675:119381863	1546	185	1558	364	1731	1922
23349	ENSMUSG00000030246	Ldhb	chr6	-	23349	77,61,59,37,47	5,8,3,2,1	68,92,140,59,58	5,7,28,13,15	244	122	0.0010851	0.022802	0.885,0.792,0.908,0.902,0.959	0.872,0.868,0.714,0.694,0.659	0.128	SE	chr6:142492492:142492616:142490248:142490604:142494099:142494217	281	19	417	68	300	485
26363	ENSMUSG00000002496	Tsc2	chr17	-	26363	19,4,17,40,28	44,39,57,47,63	3,4,1,2,13	71,63,63,34,54	244	122	3.46613e-11	3.65732e-09	0.178,0.049,0.13,0.299,0.182	0.021,0.031,0.008,0.029,0.107	0.128	SE	chr17:24606223:24606352:24604827:24604992:24607436:24607531	108	250	23	285	358	308
36291	ENSMUSG00000020131	Pcsk4	chr10	-	36291	31,54,62,66,45	0,3,1,0,0	32,96,61,82,42	0,10,5,9,8	244	122	4.65186e-08	3.30749e-06	1.0,0.9,0.969,1.0,1.0	1.0,0.828,0.859,0.82,0.724	0.128	SE	chr10:80322080:80322209:80321286:80321921:80322723:80322848	258	4	313	32	262	345
2410	ENSMUSG00000021820	Camk2g	chr14	-	2410	26,34,20,37,48	0,2,1,3,0	32,42,24,62,32	7,0,6,5,4	244	122	0.000351682	0.00704258	1.0,0.895,0.909,0.86,1.0	0.696,1.0,0.667,0.861,0.8	0.128	A5SS	chr14:20764860:20765479:20765395:20765479:20764145:20764268	165	6	192	22	171	214
7566	ENSMUSG00000052752	Traf7	chr17	-	7566	518418549581552	38,25,29,57,41	317500483484380	55,66,88,74,85	238	122	1.52101e-14	2.28577e-12	0.875,0.896,0.907,0.839,0.873	0.747,0.795,0.738,0.77,0.696	0.129	SE	chr17:24514712:24514829:24514124:24514217:24516504:24516596	2618	190	2164	368	2808	2532
963	ENSMUSG00000073468	Sft2d1	chr17	+	963	51,35,27,29,44	0,1,0,2,0	18,49,38,24,51	8,3,0,0,8	244	122	8.07537e-06	0.000270801	1.0,0.946,1.0,0.879,1.0	0.529,0.891,1.0,1.0,0.761	0.129	RI	chr17:8321799:8323335:8321799:8322140:8323276:8323335	186	3	180	19	189	199
6178	ENSMUSG00000003778	Brd8	chr18	-	6178	1.33813e+19	15,24,9,11,0	1.01313e+19	110159140136149	166	122	0	0	0.985,0.975,0.989,0.989,1.0	0.871,0.856,0.86,0.858,0.841	0.13	SE	chr18:34602202:34602247:34598614:34600241:34602671:34602776	6182	59	5665	694	6241	6359
31847	ENSMUSG00000032913	Lrig2	chr3	-	31847	95,48,69,50,130	0,0,1,0,0	110,53,63,50,63	2,17,1,0,9	244	122	9.89138e-09	7.72501e-07	1.0,1.0,0.972,1.0,1.0	0.965,0.609,0.969,1.0,0.778	0.13	SE	chr3:104462658:104462808:104461400:104461688:104463858:104464308	392	1	339	29	393	368
33727	ENSMUSG00000042594	Sh2b3	chr5	-	33727	23,22,38,34,20	29,23,31,37,44	7,7,18,13,7	18,34,28,18,26	209	122	0.00258248	0.0466564	0.316,0.358,0.417,0.349,0.21	0.185,0.107,0.273,0.297,0.136	0.13	SE	chr5:121832502:121832590:121828401:121829076:121836549:121836859	137	164	52	124	301	176
2327	ENSMUSG00000031729	Ist1	chr8	-	2327	224190223223201	269301307330326	120130139181197	402624552564515	244	122	0	0	0.294,0.24,0.266,0.253,0.236	0.13,0.094,0.112,0.138,0.161	0.131	RI	chr8:109675375:109676850:109675375:109675424:109676757:109676850	1061	1533	767	2657	2594	3424
271	ENSMUSG00000020160	Meis1	chr11	-	271	117,78,89,79,123	2,1,8,13,9	93,58,95,70,95	9,11,18,22,12	216	122	0.000109661	0.00336481	0.971,0.978,0.863,0.774,0.885	0.854,0.749,0.749,0.642,0.817	0.132	SE	chr11:18883987:18884082:18880661:18881922:18884386:18884476	486	33	411	72	519	483
3240	ENSMUSG00000026150	Mff	chr1	+	3240	212184188189184	46,44,35,31,36	89,122,134,78,67	21,50,28,52,34	181	122	0.000897786	0.0194745	0.756,0.738,0.784,0.804,0.775	0.741,0.622,0.763,0.503,0.57	0.132	SE	chr1:82747082:82747142:82741817:82741976:82750519:82750604	957	192	490	185	1149	675
3564	ENSMUSG00000021139	Gm20498	chr12	-	3564	612579467572656	39,20,29,24,20	412444547491490	57,59,59,87,68	244	122	0	0	0.887,0.935,0.89,0.923,0.943	0.783,0.79,0.823,0.738,0.783	0.132	SE	chr12:81510828:81510965:81504543:81504639:81532715:81532877	2886	132	2384	330	3018	2714
46913	ENSMUSG00000041975	Mettl8	chr2	-	46913	25,41,45,55,43	0,0,0,0,1	50,51,32,61,37	9,10,1,0,8	171	122	1.26594e-09	1.11859e-07	1.0,1.0,1.0,1.0,0.968	0.799,0.784,0.958,1.0,0.767	0.132	SE	chr2:70980376:70980426:70973252:70973392:70981854:70981967	209	1	231	28	210	259
1545	ENSMUSG00000022552	Sharpin	chr15	-	1545	16,7,26,21,27	0,0,0,0,0	13,29,38,23,31	0,12,0,3,0	244	122	2.19612e-05	0.00124081	1.0,1.0,1.0,1.0,1.0	1.0,0.547,1.0,0.793,1.0	0.132	A3SS	chr15:76347258:76347594:76347258:76347387:76347895:76348004	97	0	134	15	97	149
2706	ENSMUSG00000016940	Kctd2	chr11	+	2706	53,47,56,68,71	56,35,33,64,40	50,87,54,20,18	42,52,71,74,70	244	122	0.00507458	0.0410452	0.321,0.402,0.459,0.347,0.47	0.373,0.455,0.276,0.119,0.114	0.132	RI	chr11:115429279:115431274:115429279:115429405:115430312:115431274	295	228	229	309	523	538
28255	ENSMUSG00000026648	Dclre1c	chr2	+	28255	97,70,104,142,110	13,4,5,0,10	61,95,85,113,63	12,9,21,15,10	244	122	6.43366e-05	0.00212177	0.789,0.897,0.912,1.0,0.846	0.718,0.841,0.669,0.79,0.759	0.133	SE	chr2:3452847:3453198:3450278:3450373:3457543:3457584	523	32	417	67	555	484
2615	ENSMUSG00000053158	Fes	chr7	-	2615	26,37,27,23,30	2,3,2,0,1	27,16,34,19,20	2,2,1,6,11	162	122	0.00164843	0.0313439	0.907,0.903,0.91,1.0,0.958	0.91,0.858,0.962,0.705,0.578	0.133	A3SS	chr7:80382312:80382431:80382312:80382390:80382520:80382707	143	8	116	22	151	138
284	ENSMUSG00000055692	Tmem191c	chr16	+	284	15,23,35,16,34	37,36,62,60,48	1,25,17,4,9	44,87,88,61,47	244	122	2.35605e-08	2.04407e-06	0.169,0.242,0.22,0.118,0.262	0.011,0.126,0.088,0.032,0.087	0.133	RI	chr16:17277341:17277592:17277341:17277401:17277527:17277592	123	243	56	327	366	383
4943	ENSMUSG00000026305	Lrrfip1	chr1	+	4943	154156122196155	481373391471464	23,26,52,39,38	456545513588566	214	122	0	0	0.154,0.193,0.151,0.192,0.16	0.028,0.026,0.055,0.036,0.037	0.134	SE	chr1:91110354:91110447:91107297:91107390:91112155:91112297	783	2180	178	2668	2963	2846
26626	ENSMUSG00000027936	Crtc2	chr3	+	26626	60,58,62,45,55	2,0,5,1,0	42,92,81,47,39	6,9,10,5,5	223	122	3.51421e-06	0.000165979	0.943,1.0,0.872,0.961,1.0	0.793,0.848,0.816,0.837,0.81	0.134	SE	chr3:90257116:90257218:90254162:90254558:90259385:90259492	280	8	301	35	288	336
2729	ENSMUSG00000027951	Adar	chr3	+	2729	131,90,145,119,117	78,77,101,70,88	54,83,94,72,78	92,71,138,103,70	199	122	2.53351e-05	0.00085524	0.507,0.417,0.468,0.51,0.449	0.265,0.417,0.295,0.3,0.406	0.134	A5SS	chr3:89745375:89745601:89745375:89745523:89745819:89745991	602	414	381	474	1016	855
2271	ENSMUSG00000024118	Tedc2	chr17	-	2271	40,50,22,28,30	19,34,38,24,35	14,29,22,25,14	16,48,36,41,37	239	122	0.00335149	0.0299182	0.518,0.429,0.228,0.373,0.304	0.309,0.236,0.238,0.237,0.162	0.134	RI	chr17:24219730:24220310:24219730:24220133:24220251:24220310	170	150	104	178	320	282
15492	ENSMUSG00000024491	Rbm27	chr18	+	15492	318204225214222	38,13,25,27,65	222102239209141	46,17,45,70,75	244	122	0.00123911	0.0254059	0.807,0.887,0.818,0.799,0.631	0.707,0.75,0.726,0.599,0.485	0.135	SE	chr18:42313970:42314135:42305679:42305814:42317600:42317750	1183	168	913	253	1351	1166
37028	ENSMUSG00000058013	Sept11	chr5	+	37028	8,11,4,13,0	23,16,15,21,9	1,5,0,1,2	19,29,18,13,20	189	122	1.62061e-05	0.00063346	0.183,0.307,0.147,0.286,0.0	0.033,0.1,0.0,0.047,0.061	0.136	SE	chr5:93173469:93173537:93167499:93167687:93176039:93176077	36	84	9	99	120	108
38051	ENSMUSG00000010025	Aldh3a2	chr11	-	38051	98,49,85,105,84	67,49,94,109,74	53,40,49,42,68	85,112,97,102,70	234	122	3.41761e-06	0.000161995	0.433,0.343,0.32,0.334,0.372	0.245,0.157,0.208,0.177,0.336	0.136	SE	chr11:61247928:61248041:61244852:61246321:61248861:61249097	421	393	252	466	814	718
157	ENSMUSG00000030166	Rad52	chr6	+	157	24,32,83,48,65	38,38,40,34,30	42,46,35,55,56	74,81,60,60,61	244	122	0.00321959	0.0290899	0.24,0.296,0.509,0.414,0.52	0.221,0.221,0.226,0.314,0.315	0.136	RI	chr6:119918586:119919077:119918586:119918786:119918925:119919077	252	180	234	336	432	570
3204	ENSMUSG00000028745	Capzb	chr4	+	3204	1.04215e+19	4.15539e+19	74,142,87,69,107	3.80456e+19	234	122	0	0	0.116,0.169,0.144,0.152,0.154	0.01,0.013,0.009,0.008,0.012	0.137	SE	chr4:139288860:139288973:139287755:139287832:139291002:139291758	6474	19590	479	23476	26064	23955
18446	ENSMUSG00000026074	Map4k4	chr1	+	18446	22,4,13,11,12	25,16,12,20,24	4,6,9,3,6	12,26,39,17,39	244	122	7.1795e-05	0.00232726	0.306,0.111,0.351,0.216,0.2	0.143,0.103,0.103,0.081,0.071	0.137	SE	chr1:40001429:40001591:40000530:40000749:40004806:40004913	62	97	28	133	159	161
19190	ENSMUSG00000040370	Etfrf1	chr6	+	19190	16,11,10,21,8	29,17,35,25,16	1,13,5,1,15	23,49,25,34,41	244	122	6.45311e-05	0.00212642	0.216,0.244,0.125,0.296,0.2	0.021,0.117,0.091,0.014,0.155	0.137	SE	chr6:145214521:145214784:145211174:145211252:145215183:145215271	66	122	35	172	188	207
35001	ENSMUSG00000020212	Mdm1	chr10	+	35001	276272256332283	37,46,31,48,43	220248196240222	79,78,54,83,77	151	122	2.73559e-13	3.67904e-11	0.858,0.827,0.87,0.848,0.842	0.692,0.72,0.746,0.7,0.7	0.137	SE	chr10:118156833:118156863:118152174:118152274:118157194:118157370	1419	205	1126	371	1624	1497
1056	ENSMUSG00000008193	Spib	chr7	-	1056	100,42,129,115,165	80,72,97,107,152	79,23,46,38,68	78,74,99,82,96	175	122	0.000535331	0.013572	0.466,0.289,0.481,0.428,0.431	0.414,0.178,0.245,0.244,0.331	0.137	A3SS	chr7:44529856:44529983:44529856:44529929:44531222:44531250	551	508	254	429	1059	683
24206	ENSMUSG00000027523	Gnas	chr2	+	24206	60,75,65,85,72	100,116,83,123,116	40,51,39,56,34	124142116125147	145	122	2.24829e-08	1.67352e-06	0.335,0.352,0.397,0.368,0.343	0.213,0.232,0.221,0.274,0.163	0.138	SE	chr2:174328107:174328131:174327698:174327941:174334211:174334284	357	538	220	654	895	874
26088	ENSMUSG00000030766	Arhgap17	chr7	-	26088	82,97,94,90,95	27,25,21,15,22	97,63,100,51,75	41,16,55,27,44	169	122	0.000174551	0.00494652	0.687,0.737,0.764,0.812,0.757	0.631,0.74,0.568,0.577,0.552	0.138	SE	chr7:123285419:123285467:123279217:123280116:123286497:123287013	458	110	386	183	568	569
41470	ENSMUSG00000031328	Flna	chrX	-	41470	50,21,54,21,40	57,31,55,35,54	64,25,56,23,56	124,78,124,77,121	145	122	3.18675e-05	0.00114729	0.425,0.363,0.452,0.335,0.384	0.303,0.212,0.275,0.201,0.28	0.138	SE	chrX:74232966:74232990:74230505:74230753:74233148:74233338	186	232	224	524	418	748
17762	ENSMUSG00000050357	Carmil2	chr8	+	17762	39,31,50,43,56	2,3,4,2,6	42,44,32,30,37	15,4,17,2,5	202	122	0.00257815	0.0466417	0.922,0.862,0.883,0.928,0.849	0.628,0.869,0.532,0.901,0.817	0.139	SE	chr8:105697560:105697641:105697216:105697438:105697867:105697945	219	17	185	43	236	228
28852	ENSMUSG00000023186	Vwa5a	chr9	+	28852	160110136176167	7,11,7,13,1	138,95,130,125,144	31,16,28,20,16	197	122	5.14963e-10	4.76238e-08	0.934,0.861,0.923,0.893,0.99	0.734,0.786,0.742,0.795,0.848	0.139	SE	chr9:38719257:38719333:38718267:38718387:38722372:38722430	749	39	632	111	788	743
38723	ENSMUSG00000031295	Phka2	chrX	+	38723	31,24,35,16,22	0,0,0,1,0	26,19,58,22,25	9,2,0,0,8	175	122	4.14401e-07	2.45387e-05	1.0,1.0,1.0,0.918,1.0	0.668,0.869,1.0,1.0,0.685	0.139	SE	chrX:160584463:160584517:160581160:160581279:160586778:160586949	128	1	150	19	129	169
21771	ENSMUSG00000032058	Ppp2r1b	chr9	+	21771	61,61,73,56,52	228175199157150	8,19,6,9,3	406543575465380	233	122	0	0	0.123,0.154,0.161,0.157,0.154	0.01,0.018,0.005,0.01,0.004	0.14	SE	chr9:50873196:50873308:50870083:50870236:50873646:50873707	303	909	45	2369	1212	2414
547	ENSMUSG00000034610	Zcchc11	chr4	+	547	32,21,23,31,27	83,42,65,55,65	10,6,17,12,23	68,62,55,78,93	136	122	4.86514e-06	0.000371179	0.257,0.31,0.241,0.336,0.271	0.117,0.08,0.217,0.121,0.182	0.14	A3SS	chr4:108549225:108549413:108549240:108549413:108548054:108548170	134	310	68	356	444	424
20281	ENSMUSG00000033931	Rbm34	chr8	-	20281	51,97,51,100,50	0,6,0,0,0	77,113,93,99,88	0,6,32,18,12	181	122	6.57022e-10	5.99235e-08	1.0,0.916,1.0,1.0,1.0	1.0,0.927,0.662,0.788,0.832	0.141	SE	chr8:126961911:126961971:126953365:126953449:126965381:126965622	349	6	470	68	355	538
1522	ENSMUSG00000021611	Tert	chr13	+	1522	17,20,7,5,22	0,1,0,1,0	23,23,23,11,9	3,0,2,1,6	244	122	4.63639e-05	0.00138681	1.0,0.909,1.0,0.714,1.0	0.793,1.0,0.852,0.846,0.429	0.141	A5SS	chr13:73628147:73628674:73628147:73628481:73634151:73634347	71	2	89	12	73	101
2353	ENSMUSG00000005625	Psmd4	chr3	-	2353	26,16,32,26,15	0,0,1,0,0	31,10,35,27,25	0,4,1,5,0	244	122	0.000969229	0.0116786	1.0,1.0,0.941,1.0,1.0	1.0,0.556,0.946,0.73,1.0	0.142	RI	chr3:95034941:95035924:95034941:95035010:95035809:95035924	115	1	128	10	116	138
22251	ENSMUSG00000039844	Rapgef1	chr2	+	22251	6,4,18,20,15	47,20,43,39,26	0,2,0,0,0	30,26,51,32,31	244	122	1.11022e-16	1.9404e-14	0.06,0.091,0.173,0.204,0.224	0.0,0.037,0.0,0.0,0.0	0.143	SE	chr2:29719592:29719850:29707197:29707400:29722223:29722309	63	175	2	170	238	172
33093	ENSMUSG00000056938	Acbd4	chr11	+	33093	20,13,14,35,12	1,0,0,0,0	14,16,16,28,12	0,0,2,1,7	244	122	0.000655777	0.0148755	0.909,1.0,1.0,1.0,1.0	1.0,1.0,0.8,0.933,0.462	0.143	SE	chr11:103103234:103103369:103102681:103103096:103103525:103103644	94	1	86	10	95	96
35214	ENSMUSG00000049659	Aftph	chr11	-	35214	73,129,90,120,82	204130197190192	40,45,52,23,44	183188208215237	202	122	1.81788e-12	2.24681e-10	0.178,0.375,0.216,0.276,0.205	0.117,0.126,0.131,0.061,0.101	0.143	SE	chr11:20696750:20696831:20692464:20692588:20698312:20698373	494	913	204	1031	1407	1235
46015	ENSMUSG00000017210	Med24	chr11	-	46015	188124199157167	180228205208201	94,80,94,104,125	204272243262262	178	122	1.06164e-10	1.05299e-08	0.417,0.272,0.4,0.341,0.363	0.24,0.168,0.21,0.214,0.246	0.143	SE	chr11:98717708:98717765:98716413:98716525:98717909:98718142	835	1022	497	1243	1857	1740
12782	ENSMUSG00000022552	Sharpin	chr15	-	12782	22,22,31,39,29	0,0,0,0,0	20,31,17,15,27	0,12,0,3,0	244	122	1.2787e-05	0.000517135	1.0,1.0,1.0,1.0,1.0	1.0,0.564,1.0,0.714,1.0	0.144	SE	chr15:76347663:76347807:76347258:76347387:76347895:76348004	143	0	110	15	143	125
38522	ENSMUSG00000000884	Gnb1l	chr16	+	38522	108161124153137	8,11,19,11,6	75188123159112	37,24,12,35,18	244	122	0.000273731	0.00720167	0.871,0.88,0.765,0.874,0.919	0.503,0.797,0.837,0.694,0.757	0.144	SE	chr16:18544114:18544273:18540971:18541097:18548092:18548191	683	55	657	126	738	783
43643	ENSMUSG00000071226	Cecr2	chr6	+	43643	394220427391353	68,16,61,42,40	251242285210256	57,60,59,71,92	205	122	8.47897e-10	7.68024e-08	0.775,0.891,0.806,0.847,0.84	0.724,0.706,0.742,0.638,0.623	0.145	SE	chr6:120743782:120743866:120738155:120738325:120750851:120751005	1785	227	1244	339	2012	1583
1387	ENSMUSG00000022668	Gtpbp8	chr16	-	1387	27,17,12,12,24	0,0,0,3,2	18,11,8,19,6	0,0,2,9,2	233	122	0.00211763	0.032448	1.0,1.0,1.0,0.677,0.863	1.0,1.0,0.677,0.525,0.611	0.145	A5SS	chr16:44745282:44745493:44745394:44745493:44742503:44742603	92	5	62	13	97	75
3099	ENSMUSG00000097589	Dleu2	chr14	-	3099	18,19,24,30,41	18,19,16,25,21	23,39,14,28,23	46,40,57,32,27	244	122	0.00103185	0.0189012	0.333,0.333,0.429,0.375,0.494	0.2,0.328,0.109,0.304,0.299	0.145	A5SS	chr14:61648481:61648822:61648617:61648822:61643359:61643455	132	99	127	202	231	329
3275	ENSMUSG00000030815	Phkg2	chr7	+	3275	50,53,44,62,66	0,1,1,0,0	33,30,38,28,59	8,5,8,5,1	143	122	8.92311e-11	1.24031e-08	1.0,0.978,0.974,1.0,1.0	0.779,0.837,0.802,0.827,0.981	0.145	A5SS	chr7:127577534:127577710:127577534:127577688:127579666:127579732	275	2	188	27	277	215
20379	ENSMUSG00000026924	Sec16a	chr2	-	20379	14,9,19,6,15	35,14,28,30,32	1,2,10,1,9	20,36,37,7,35	181	122	0.000202154	0.00558902	0.212,0.302,0.314,0.119,0.24	0.033,0.036,0.154,0.088,0.148	0.146	SE	chr2:26413678:26413738:26412835:26412913:26414370:26414445	63	139	23	135	202	158
23489	ENSMUSG00000028878	Fam76a	chr4	-	23489	243283252276241	3,10,5,11,10	192222208233188	23,44,19,32,32	208	122	0	0	0.979,0.943,0.967,0.936,0.934	0.83,0.747,0.865,0.81,0.775	0.146	SE	chr4:132910691:132910778:132903897:132904033:132913668:132913826	1295	39	1043	150	1334	1193
36064	ENSMUSG00000006638	Abhd1	chr5	+	36064	23,21,28,34,35	1,0,0,0,0	28,40,38,40,46	3,11,5,2,0	234	122	5.5221e-08	3.84357e-06	0.923,1.0,1.0,1.0,1.0	0.83,0.655,0.798,0.912,1.0	0.146	SE	chr5:30953878:30953991:30953666:30953712:30954090:30954154	141	1	192	21	142	213
3345	ENSMUSG00000030322	Mbd4	chr6	-	3345	144,95,129,176,164	41,46,52,78,99	101,96,130,119,119	77,93,86,82,104	244	122	1.53923e-05	0.000576914	0.637,0.508,0.554,0.53,0.453	0.396,0.34,0.43,0.42,0.364	0.146	A5SS	chr6:115848394:115849732:115848905:115849732:115845542:115845617	708	316	565	442	1024	1007
19047	ENSMUSG00000025505	Tmem80	chr7	+	19047	109,92,122,121,164	9,12,6,8,7	82,74,106,58,57	12,19,14,16,12	214	122	2.07495e-06	0.000103549	0.873,0.814,0.921,0.896,0.93	0.796,0.689,0.812,0.674,0.73	0.147	SE	chr7:141334010:141334103:141333380:141333731:141335844:141336067	608	42	377	73	650	450
38431	ENSMUSG00000019861	Gopc	chr10	-	38431	58,23,30,41,41	92,90,100,144,97	15,10,4,6,18	103,96,92,88,75	145	122	9.64358e-10	8.6561e-08	0.347,0.177,0.202,0.193,0.262	0.109,0.081,0.035,0.054,0.168	0.147	SE	chr10:52357341:52357365:52354571:52354747:52358772:52358937	193	523	53	454	716	507
43205	ENSMUSG00000025521	Tmem192	chr8	+	43205	453448420493461	6,0,4,4,5	354593399581424	49,57,41,53,27	244	122	0	0	0.974,1.0,0.981,0.984,0.979	0.783,0.839,0.83,0.846,0.887	0.147	SE	chr8:64964197:64964532:64959542:64959609:64965538:64965591	2275	19	2351	227	2294	2578
403	ENSMUSG00000019907	Ppp1r12a	chr10	+	403	84,89,99,106,85	8,5,4,1,3	108,114,109,77,93	9,18,18,13,18	244	122	2.80302e-07	1.72414e-05	0.84,0.899,0.925,0.981,0.934	0.857,0.76,0.752,0.748,0.721	0.148	SE	chr10:108252756:108252924:108251839:108251944:108253324:108253495	463	21	501	76	484	577
30764	ENSMUSG00000024034	Tmprss3	chr17	-	30764	57,66,36,41,47	0,0,1,3,2	38,69,96,62,76	6,5,19,5,10	244	122	4.32442e-08	3.0989e-06	1.0,1.0,0.947,0.872,0.922	0.76,0.873,0.716,0.861,0.792	0.148	SE	chr17:31189138:31189304:31188299:31188469:31189672:31189716	247	6	341	45	253	386
37848	ENSMUSG00000026955	Sapcd2	chr2	+	37848	1.03181e+17	135109118140132	7.32116e+15	194271299242196	223	122	0	0	0.807,0.802,0.822,0.825,0.836	0.674,0.701,0.609,0.692,0.677	0.148	SE	chr2:25373415:25373517:25372320:25372998:25374951:25375064	5270	634	4492	1202	5904	5694
3001	ENSMUSG00000028467	Gba2	chr4	-	3001	49,18,49,35,66	2,1,2,3,1	17,18,52,25,23	0,6,0,6,9	244	122	0.00327777	0.0294396	0.925,0.9,0.925,0.854,0.971	1.0,0.6,1.0,0.676,0.561	0.148	RI	chr4:43569180:43569955:43569180:43569285:43569829:43569955	217	9	135	21	226	156
10298	ENSMUSG00000020166	Cnot2	chr10	-	10298	20,23,9,23,28	21,34,33,33,33	9,7,8,15,5	26,40,22,30,53	179	122	0.000159309	0.00458666	0.394,0.316,0.157,0.322,0.366	0.191,0.107,0.199,0.254,0.06	0.149	SE	chr10:116537220:116537278:116507040:116507188:116549032:116549175	103	154	44	171	257	215
48019	ENSMUSG00000031109	Enox2	chrX	-	48019	37,31,42,54,35	0,3,5,1,3	41,65,37,33,52	12,13,3,7,6	244	122	0.000366876	0.00921134	1.0,0.838,0.808,0.964,0.854	0.631,0.714,0.86,0.702,0.813	0.149	SE	chrX:49168640:49168784:49080616:49080751:49286844:49286904	199	12	228	41	211	269
3986	ENSMUSG00000050855	Zfp940	chr7	-	3986	14,20,13,17,25	33,20,17,27,13	21,7,5,4,36	49,23,35,36,35	244	122	0.00376026	0.0329642	0.175,0.333,0.277,0.239,0.49	0.176,0.132,0.067,0.053,0.34	0.149	RI	chr7:29846468:29846960:29846468:29846564:29846833:29846960	89	110	73	178	199	251
25419	ENSMUSG00000029471	Camkk2	chr5	-	25419	192188237293259	16,14,17,7,8	143173225225202	50,28,36,31,16	244	122	2.04787e-08	1.53586e-06	0.857,0.87,0.875,0.954,0.942	0.588,0.755,0.758,0.784,0.863	0.15	SE	chr5:122742099:122742228:122737432:122737533:122743869:122743957	1169	62	968	161	1231	1129
39955	ENSMUSG00000021870	Slmap	chr14	-	39955	21,17,24,12,25	36,18,32,25,25	14,8,15,19,13	41,44,52,34,38	172	122	0.000304483	0.00788	0.293,0.401,0.347,0.254,0.415	0.195,0.114,0.17,0.284,0.195	0.15	SE	chr14:26459409:26459460:26442574:26442634:26460041:26460210	99	136	69	209	235	278
8706	ENSMUSG00000024566	Atp9b	chr18	-	8706	28,27,24,22,20	67,24,115,79,62	6,13,23,12,6	73,102,94,70,79	154	122	3.72646e-05	0.00131416	0.249,0.471,0.142,0.181,0.204	0.061,0.092,0.162,0.12,0.057	0.151	SE	chr18:80736811:80736844:80734140:80736149:80738652:80738781	121	347	60	418	468	478
36126	ENSMUSG00000030269	Mtmr14	chr6	+	36126	316410350377362	77,102,91,57,81	307378344331314	146180119174109	236	122	1.27904e-09	1.12728e-07	0.68,0.675,0.665,0.774,0.698	0.521,0.521,0.599,0.496,0.598	0.151	SE	chr6:113277830:113277945:113270521:113270701:113280602:113281087	1815	408	1674	728	2223	2402
42325	ENSMUSG00000060279	Ap2a1	chr7	-	42325	17,12,35,32,31	78,79,75,104,116	0,0,0,0,0	91130143102112	187	122	0	0	0.124,0.09,0.233,0.167,0.148	0.0,0.0,0.0,0.0,0.0	0.152	SE	chr7:44903461:44903527:44903143:44903200:44903740:44903901	127	452	0	578	579	578
31432	ENSMUSG00000028708	Mknk1	chr4	+	31432	42,43,32,41,31	69,67,73,63,71	8,27,6,14,14	66,102,104,94,76	227	122	3.77476e-15	5.89605e-13	0.247,0.256,0.191,0.259,0.19	0.061,0.125,0.03,0.074,0.09	0.153	SE	chr4:115854901:115855007:115848219:115848362:115857031:115857133	189	343	69	442	532	511
25476	ENSMUSG00000027463	Slc52a3	chr2	+	25476	31,39,35,40,46	0,0,0,0,0	21,26,16,32,14	3,6,0,2,1	244	122	3.10303e-06	0.00014779	1.0,1.0,1.0,1.0,1.0	0.778,0.684,1.0,0.889,0.875	0.155	SE	chr2:152005531:152006019:152004051:152004678:152007480:152007604	191	0	109	12	191	121
18272	ENSMUSG00000001323	Srr	chr11	-	18272	60,57,59,68,73	0,1,1,1,0	44,57,50,54,39	4,10,2,6,5	244	122	3.60045e-10	3.38493e-08	1.0,0.966,0.967,0.971,1.0	0.846,0.74,0.926,0.818,0.796	0.156	SE	chr11:74919436:74919662:74912961:74913133:74925618:74925675	317	3	244	27	320	271
34342	ENSMUSG00000028273	Pdlim5	chr3	-	34342	13,6,9,1,8	22,17,16,30,12	0,1,0,1,3	17,30,28,27,28	244	122	2.36734e-10	2.26865e-08	0.228,0.15,0.22,0.016,0.25	0.0,0.016,0.0,0.018,0.051	0.156	SE	chr3:142282968:142283112:142277816:142278001:142303942:142303979	37	97	5	130	134	135
40581	ENSMUSG00000025089	Gfra1	chr19	-	40581	226189312331449	115110170136136	233141167164212	154138163151193	136	122	3.46688e-09	2.90179e-07	0.638,0.607,0.622,0.686,0.748	0.576,0.478,0.479,0.493,0.496	0.156	SE	chr19:58392572:58392587:58300241:58300578:58451968:58452052	1507	667	917	799	2174	1716
387	ENSMUSG00000048058	Ldlrad3	chr2	-	387	38,31,26,34,28	4,0,1,1,0	18,34,26,16,18	6,4,0,1,7	217	122	0.000260188	0.00565855	0.842,1.0,0.936,0.95,1.0	0.628,0.827,1.0,0.9,0.591	0.156	A5SS	chr2:102113532:102113679:102113628:102113679:102069932:102070058	157	6	112	18	163	130
1245	ENSMUSG00000056763	Cspp1	chr1	+	1245	9,10,11,13,22	13,13,28,29,37	8,3,8,4,11	33,38,24,22,22	129	122	0.00275841	0.0384765	0.396,0.421,0.271,0.298,0.36	0.187,0.069,0.24,0.147,0.321	0.156	A5SS	chr1:10039772:10039887:10039772:10039879:10045075:10045184	65	120	34	139	185	173
2870	ENSMUSG00000026867	Gapvd1	chr2	-	2870	247134250169195	153119170155152	128,123,114,84,145	155168216162187	184	122	1.73686e-10	2.28011e-08	0.517,0.427,0.494,0.42,0.46	0.354,0.327,0.259,0.256,0.34	0.156	A5SS	chr2:34717252:34717382:34717315:34717382:34715204:34715330	995	749	594	888	1744	1482
34594	ENSMUSG00000074272	Ceacam1	chr7	-	34594	99,59,125,135,116	25,20,15,26,25	58105154102114	38,44,65,35,55	174	122	5.9377e-06	0.000260301	0.735,0.674,0.854,0.785,0.765	0.517,0.626,0.624,0.671,0.592	0.157	SE	chr7:25465467:25465520:25464848:25464880:25466316:25466437	534	111	533	237	645	770
41348	ENSMUSG00000023051	Tarbp2	chr15	+	41348	20,20,5,14,17	0,0,0,2,2	7,16,28,27,17	5,2,2,0,4	224	122	0.000312201	0.00805874	1.0,1.0,1.0,0.792,0.822	0.433,0.813,0.884,1.0,0.698	0.157	SE	chr15:102520474:102520577:102518454:102518602:102521137:102521213	76	4	95	13	80	108
10613	ENSMUSG00000018340	Anxa6	chr11	-	10613	638550576607630	136,119,109,134,77	469552601385431	162272227194228	139	122	0	0	0.805,0.802,0.823,0.799,0.878	0.718,0.64,0.699,0.635,0.624	0.158	SE	chr11:54987050:54987068:54986121:54986215:54991390:54991444	3001	575	2438	1083	3576	3521
20912	ENSMUSG00000021952	Xpo4	chr14	-	20912	66,17,50,37,55	84,40,71,41,70	17,16,7,19,14	55,72,71,53,73	244	122	4.4742e-12	5.25384e-10	0.282,0.175,0.26,0.311,0.282	0.134,0.1,0.047,0.152,0.088	0.158	SE	chr14:57643334:57643489:57641799:57643223:57648418:57648524	225	306	73	324	531	397
34002	ENSMUSG00000020792	Exoc7	chr11	-	34002	58,106,108,102,68	296350291378332	3,14,6,8,4	399633566521465	160	122	0	0	0.13,0.188,0.221,0.171,0.135	0.006,0.017,0.008,0.012,0.007	0.159	SE	chr11:116293274:116293313:116292518:116292584:116293971:116294038	442	1647	35	2584	2089	2619
316	ENSMUSG00000025498	Irf7	chr7	-	316	66,46,68,23,40	73,47,68,26,43	46,33,35,43,10	74,110,72,78,42	190	122	1.36322e-06	6.19747e-05	0.367,0.386,0.391,0.362,0.374	0.285,0.162,0.238,0.261,0.133	0.16	RI	chr7:141264492:141264783:141264492:141264655:141264724:141264783	243	257	167	376	500	543
10102	ENSMUSG00000052384	Nrros	chr16	-	10102	23,22,27,28,37	30,21,34,25,35	8,13,9,5,12	10,41,41,39,21	244	122	1.7676e-06	8.96774e-05	0.277,0.344,0.284,0.359,0.346	0.286,0.137,0.099,0.06,0.222	0.161	SE	chr16:32162237:32163397:32142824:32145005:32165379:32165476	137	145	47	152	282	199
20550	ENSMUSG00000034243	Golgb1	chr16	+	20550	125,69,99,77,89	16,1,6,17,6	79,73,66,52,76	13,21,17,16,16	216	122	7.1858e-05	0.00232726	0.815,0.975,0.903,0.719,0.893	0.774,0.663,0.687,0.647,0.728	0.161	SE	chr16:36886133:36886228:36885010:36885188:36887238:36887403	459	46	346	83	505	429
21972	ENSMUSG00000020717	Pecam1	chr11	-	21972	36,32,53,81,80	17,10,12,8,12	30,41,45,43,41	17,12,23,24,29	148	122	0.000237713	0.00642878	0.636,0.725,0.785,0.893,0.846	0.593,0.738,0.617,0.596,0.538	0.161	SE	chr11:106714901:106714928:106699591:106699885:106750142:106750628	282	59	200	105	341	305
17062	ENSMUSG00000056763	Cspp1	chr1	+	17062	26,24,14,49,16	65,39,42,47,54	16,9,14,9,15	74,71,97,64,49	145	122	4.50959e-06	0.000207391	0.252,0.341,0.219,0.467,0.2	0.154,0.096,0.108,0.106,0.205	0.162	SE	chr1:10059823:10059847:10058719:10058823:10064332:10064413	129	247	63	355	376	418
3218	ENSMUSG00000015291	Gdi1	chrX	+	3218	718641687847913	138117120158147	677563733741516	186278251301188	244	122	3.4639e-14	6.76152e-12	0.722,0.733,0.741,0.728,0.756	0.645,0.503,0.594,0.552,0.578	0.162	RI	chrX:74307671:74308261:74307671:74307870:74308129:74308261	3806	680	3230	1204	4486	4434
27745	ENSMUSG00000040940	Arhgef1	chr7	+	27745	568540631745662	8,1,6,5,4	443585611484513	56,74,82,46,33	244	122	0	0	0.973,0.996,0.981,0.987,0.988	0.798,0.798,0.788,0.84,0.886	0.163	SE	chr7:24918519:24919351:24917894:24918000:24919630:24919776	3146	24	2636	291	3170	2927
27747	ENSMUSG00000040940	Arhgef1	chr7	+	27747	574549629717649	8,1,6,5,4	435601606486500	56,74,82,46,33	244	122	0	0	0.973,0.996,0.981,0.986,0.988	0.795,0.802,0.787,0.841,0.883	0.163	SE	chr7:24919183:24919351:24917894:24918000:24919630:24919776	3118	24	2628	291	3142	2919
10475	ENSMUSG00000113035	5830428M24Rik	chr12	-	10475	8,27,8,23,5	0,0,0,0,0	11,28,33,16,8	2,1,3,4,0	244	122	0.000132426	0.0039208	1.0,1.0,1.0,1.0,1.0	0.733,0.933,0.846,0.667,1.0	0.164	SE	chr12:69468186:69468360:69464786:69465414:69470393:69470517	71	0	96	10	71	106
20549	ENSMUSG00000034243	Golgb1	chr16	+	20549	112,88,101,95,61	16,1,6,17,6	75,80,51,58,77	13,21,17,16,16	219	122	4.61417e-05	0.00159323	0.796,0.98,0.904,0.757,0.85	0.763,0.68,0.626,0.669,0.728	0.164	SE	chr16:36886130:36886228:36885010:36885188:36887238:36887403	457	46	341	83	503	424
26315	ENSMUSG00000033943	Mga	chr2	+	26315	56,8,37,23,18	1,1,2,0,1	29,15,24,34,8	0,2,6,3,5	244	122	0.000121506	0.00365753	0.966,0.8,0.902,1.0,0.9	1.0,0.789,0.667,0.85,0.444	0.164	SE	chr2:119941221:119941845:119938638:119938786:119946171:119946247	142	5	110	16	147	126
28700	ENSMUSG00000028689	Ccdc163	chr4	+	28700	4,12,12,4,4	0,0,0,0,0	11,16,12,15,14	0,3,3,8,1	133	122	2.19565e-07	1.36966e-05	1.0,1.0,1.0,1.0,1.0	1.0,0.83,0.786,0.632,0.928	0.165	SE	chr4:116709261:116709273:116708570:116708656:116709437:116709619	36	0	68	15	36	83
3242	ENSMUSG00000025899	Alkbh8	chr9	+	3242	52,28,37,54,57	17,9,9,12,26	22,42,45,52,33	10,20,34,30,27	244	122	0.00126524	0.0217996	0.605,0.609,0.673,0.692,0.523	0.524,0.512,0.398,0.464,0.379	0.165	A5SS	chr9:3335477:3335748:3335477:3335594:3338455:3338591	228	73	194	121	301	315
19035	ENSMUSG00000034480	Diaph2	chrX	+	19035	33,25,18,21,23	3,0,0,1,4	18,13,20,18,35	1,6,9,4,7	142	122	0.000104115	0.00321452	0.904,1.0,1.0,0.947,0.832	0.939,0.651,0.656,0.795,0.811	0.166	SE	chrX:129825926:129825947:129821238:129821343:129902899:129903039	120	8	104	27	128	131
11783	ENSMUSG00000006276	Eps15l1	chr8	-	11783	49,52,35,58,44	11,33,26,16,22	55,98,50,80,56	43,98,53,47,55	244	122	0.00254898	0.0463042	0.69,0.441,0.402,0.644,0.5	0.39,0.333,0.321,0.46,0.337	0.167	SE	chr8:72358312:72358445:72340998:72341524:72367903:72367986	238	108	339	296	346	635
2364	ENSMUSG00000109378	Gm49396	chr7	+	2364	65,62,76,48,73	18,12,17,24,12	60,26,75,60,48	20,35,34,31,17	244	122	0.0062748	0.0482731	0.644,0.721,0.691,0.5,0.753	0.6,0.271,0.524,0.492,0.585	0.167	RI	chr7:30566748:30567500:30566748:30566936:30567142:30567500	324	83	269	137	407	406
42018	ENSMUSG00000038695	Josd2	chr7	+	42018	37,24,20,32,31	0,1,2,0,0	8,35,13,21,28	1,3,3,2,5	244	122	4.47861e-06	0.00020685	1.0,0.923,0.833,1.0,1.0	0.8,0.854,0.684,0.84,0.737	0.168	SE	chr7:44470858:44470987:44470411:44470537:44471233:44471307	144	3	105	14	147	119
45689	ENSMUSG00000032570	Atp2c1	chr9	-	45689	67,50,70,73,57	5,1,6,0,0	23,86,45,44,54	7,6,16,5,7	189	122	2.36919e-06	0.000116126	0.896,0.97,0.883,1.0,1.0	0.68,0.902,0.645,0.85,0.833	0.168	SE	chr9:105494414:105494482:105470036:105470147:105494892:105495094	317	12	252	41	329	293
1393	ENSMUSG00000001151	Pcnt	chr10	-	1393	1,5,9,6,5	19,18,16,23,7	1,2,0,0,0	21,14,15,6,11	175	122	1.60318e-07	1.27573e-05	0.035,0.162,0.282,0.154,0.332	0.032,0.091,0.0,0.0,0.0	0.168	A5SS	chr10:76380162:76380439:76380216:76380439:76379904:76380055	26	83	3	67	109	70
2624	ENSMUSG00000006638	Abhd1	chr5	+	2624	9,11,16,8,38	0,3,0,0,2	16,20,10,22,15	2,7,3,8,0	197	122	0.000119356	0.0030004	1.0,0.694,1.0,1.0,0.922	0.832,0.639,0.674,0.63,1.0	0.168	A5SS	chr5:30950065:30950248:30950065:30950172:30952884:30953045	82	5	83	20	87	103
3307	ENSMUSG00000053746	Ptrh1	chr2	+	3307	9,15,0,4,10	5,12,15,7,19	0,3,10,3,6	5,25,28,38,12	244	122	0.00510872	0.0410943	0.474,0.385,0.0,0.222,0.208	0.0,0.057,0.152,0.038,0.2	0.168	RI	chr2:32776303:32776806:32776303:32776523:32776706:32776806	38	58	22	108	96	130
1565	ENSMUSG00000027680	Fxr1	chr3	+	1565	248269265219190	269216216148188	136147215161169	274338391310264	208	122	0	0	0.351,0.422,0.418,0.465,0.372	0.225,0.203,0.244,0.233,0.273	0.17	RI	chr3:34058023:34058231:34058023:34058081:34058168:34058231	1191	1037	828	1577	2228	2405
7567	ENSMUSG00000052752	Traf7	chr17	-	7567	332254366340333	38,25,29,57,41	198316272289242	55,66,88,74,85	244	122	9.67004e-13	1.24967e-10	0.814,0.836,0.863,0.749,0.802	0.643,0.705,0.607,0.661,0.587	0.172	SE	chr17:24514712:24514866:24514124:24514217:24516504:24516596	1625	190	1317	368	1815	1685
3261	ENSMUSG00000019843	Fyn	chr10	+	3261	90,121,99,108,118	22,25,12,6,6	44,62,58,77,63	18,12,17,19,25	244	122	0.000244539	0.00657306	0.672,0.708,0.805,0.9,0.908	0.55,0.721,0.63,0.67,0.558	0.173	SE	chr10:39529436:39529601:39526780:39526930:39532015:39532195	536	71	304	91	607	395
30583	ENSMUSG00000028459	Cd72	chr4	-	30583	755719677775732	40,54,34,33,55	690705724668648	177144121102129	244	122	0	0	0.904,0.869,0.909,0.922,0.869	0.661,0.71,0.749,0.766,0.715	0.174	SE	chr4:43453082:43453211:43452320:43452639:43454241:43454323	3658	216	3435	673	3874	4108
31846	ENSMUSG00000032913	Lrig2	chr3	-	31846	94,33,55,35,75	0,0,1,0,0	66,27,48,34,54	2,17,1,0,9	244	122	4.7433e-08	3.36564e-06	1.0,1.0,0.965,1.0,1.0	0.943,0.443,0.96,1.0,0.75	0.174	SE	chr3:104462658:104462787:104461400:104461688:104463858:104464308	292	1	229	29	293	258
509	ENSMUSG00000032316	Clk3	chr9	-	509	141,72,148,126,165	74,55,78,62,75	82,60,77,56,88	65,84,95,89,81	244	122	4.07347e-08	3.31309e-06	0.488,0.396,0.487,0.504,0.524	0.387,0.263,0.288,0.239,0.352	0.174	RI	chr9:57758283:57761040:57758283:57758350:57760823:57761040	652	344	363	414	996	777
1975	ENSMUSG00000022999	Lmbr1l	chr15	-	1975	19,2,26,22,15	2,0,1,0,0	36,6,8,14,9	3,6,0,1,1	244	122	6.20291e-05	0.00146469	0.826,1.0,0.929,1.0,1.0	0.857,0.333,1.0,0.875,0.818	0.174	RI	chr15:98908519:98908921:98908519:98908596:98908848:98908921	84	3	73	11	87	84
46912	ENSMUSG00000041975	Mettl8	chr2	-	46912	39,67,42,43,53	0,0,0,0,1	39,31,40,49,31	9,10,1,0,8	185	122	1.48892e-10	1.4658e-08	1.0,1.0,1.0,1.0,0.972	0.741,0.672,0.963,1.0,0.719	0.175	SE	chr2:70976073:70976137:70973252:70973392:70981854:70982195	244	1	190	28	245	218
2264	ENSMUSG00000047767	Atg16l2	chr7	-	2264	123,90,151,206,240	169160172216180	62,28,47,69,64	213176171174174	244	122	0	0	0.267,0.22,0.305,0.323,0.4	0.127,0.074,0.121,0.165,0.155	0.175	RI	chr7:101291486:101291999:101291486:101291592:101291878:101291999	810	897	270	908	1707	1178
11545	ENSMUSG00000078812	Eif5a	chr11	-	11545	22,36,36,23,23	17,15,20,15,18	16,22,23,12,13	20,28,30,11,23	151	122	0.000546159	0.0127611	0.511,0.66,0.593,0.553,0.508	0.393,0.388,0.382,0.468,0.314	0.176	SE	chr11:69919448:69919478:69919150:69919336:69921023:69921085	140	85	86	112	225	198
76	ENSMUSG00000020828	Pld2	chr11	+	76	21,7,33,13,19	0,0,0,0,0	31,26,8,6,12	5,1,0,4,0	244	122	0.000473832	0.0113382	1.0,1.0,1.0,1.0,1.0	0.756,0.929,1.0,0.429,1.0	0.177	SE	chr11:70555595:70555730:70555298:70555381:70555907:70556061	93	0	83	10	93	93
9362	ENSMUSG00000025144	Cenpx	chr11	-	9362	189124136150127	266225228275227	20,44,40,52,49	226394303322281	221	122	0	0	0.282,0.233,0.248,0.231,0.236	0.047,0.058,0.068,0.082,0.088	0.177	SE	chr11:120712439:120712539:120711843:120711895:120713692:120713732	726	1221	205	1526	1947	1731
29709	ENSMUSG00000097121	D130020L05Rik	chr12	+	29709	0,4,5,20,4	12,13,4,18,8	5,1,6,0,3	51,20,37,21,33	244	122	1.93716e-05	0.000741842	0.0,0.133,0.385,0.357,0.2	0.047,0.024,0.075,0.0,0.043	0.177	SE	chr12:101086187:101086352:101084283:101084499:101088041:101088179	33	55	15	162	88	177
378	ENSMUSG00000057335	Cep170	chr1	-	378	15,14,22,20,14	28,18,33,24,31	7,0,20,14,6	47,20,51,21,45	151	122	0.000307727	0.00637859	0.302,0.386,0.35,0.402,0.267	0.107,0.0,0.241,0.35,0.097	0.182	A5SS	chr1:176742470:176742648:176742500:176742648:176739918:176740089	85	134	47	184	219	231
852	ENSMUSG00000052609	Plekhg3	chr12	+	852	1,4,10,13,8	12,13,10,12,9	0,2,3,1,4	2,10,12,15,18	208	122	0.000498946	0.00958544	0.047,0.153,0.37,0.389,0.343	0.0,0.105,0.128,0.038,0.115	0.183	A5SS	chr12:76572394:76572745:76572394:76572658:76573246:76573360	36	56	10	57	92	67
55	ENSMUSG00000022838	Eaf2	chr16	-	55	24,40,13,24,15	0,0,0,1,0	33,30,76,13,27	0,2,4,10,3	244	122	8.44286e-07	4.6138e-05	1.0,1.0,1.0,0.923,1.0	1.0,0.882,0.905,0.394,0.818	0.185	SE	chr16:36810471:36810608:36808014:36808160:36824657:36824752	116	1	179	19	117	198
4106	ENSMUSG00000086236	5830418P13Rik	chr9	+	4106	6,7,3,6,9	24,14,16,7,9	3,0,8,2,3	11,37,33,19,19	145	122	0.000728112	0.0169299	0.174,0.296,0.136,0.419,0.457	0.187,0.0,0.169,0.081,0.117	0.186	A3SS	chr9:103428373:103428506:103428397:103428506:103427688:103427787	31	70	16	119	101	135
3893	ENSMUSG00000027381	Bcl2l11	chr2	+	3893	59,40,66,59,51	15,16,36,23,25	16,55,38,48,35	37,37,35,17,42	244	122	0.00255536	0.0246934	0.663,0.556,0.478,0.562,0.505	0.178,0.426,0.352,0.585,0.294	0.186	RI	chr2:128128619:128129014:128128619:128128756:128128924:128129014	275	115	192	168	390	360
1317	ENSMUSG00000029422	Rsrc2	chr5	-	1317	55,72,51,80,59	33,20,25,27,18	21,69,19,41,25	24,26,31,26,24	220	122	0.00251478	0.0458088	0.48,0.666,0.531,0.622,0.645	0.327,0.595,0.254,0.467,0.366	0.187	SE	chr5:123746771:123746870:123745496:123745589:123749288:123749367	317	123	175	131	440	306
5119	ENSMUSG00000021466	Ptch1	chr13	-	5119	8,9,2,11,3	12,8,14,15,19	0,0,4,0,1	18,2,30,18,23	244	122	7.698e-09	6.10047e-07	0.25,0.36,0.067,0.268,0.073	0.0,0.0,0.063,0.0,0.021	0.187	SE	chr13:63537481:63537608:63534289:63534408:63539232:63539358	33	68	5	91	101	96
34732	ENSMUSG00000038084	Opa1	chr16	+	34732	288239234332264	158114139179124	117157142155144	190134212134171	232	122	3.65796e-12	4.38447e-10	0.489,0.524,0.47,0.494,0.528	0.245,0.381,0.26,0.378,0.307	0.187	SE	chr16:29597585:29597696:29589680:29589748:29602211:29602265	1357	714	715	841	2071	1556
1623	ENSMUSG00000028057	Rit1	chr3	+	1623	4,18,5,11,17	11,5,19,11,16	4,4,1,7,1	8,10,8,11,22	223	122	0.00495386	0.0408589	0.166,0.663,0.126,0.354,0.368	0.215,0.18,0.064,0.258,0.024	0.187	RI	chr3:88717325:88717658:88717325:88717470:88717572:88717658	55	62	17	59	117	76
9864	ENSMUSG00000032185	Carm1	chr9	+	9864	406451421424443	47,44,23,25,23	255381419293358	73,101,123,80,76	190	122	0	0	0.847,0.868,0.922,0.916,0.925	0.692,0.708,0.686,0.702,0.752	0.188	SE	chr9:21587850:21587919:21587507:21587585:21588048:21588200	2145	162	1706	453	2307	2159
18404	ENSMUSG00000094724	Rnaset2b	chr17	+	18404	142,140,135,118,99	40,10,0,37,0	89174136131122	34,77,27,79,20	179	122	8.07431e-06	0.000345194	0.708,0.905,1.0,0.685,1.0	0.641,0.606,0.774,0.531,0.806	0.188	SE	chr17:6985055:6985113:6981107:6981168:6988721:6988792	634	87	652	237	721	889
2180	ENSMUSG00000030689	Ino80e	chr7	-	2180	55,34,44,50,75	57,58,51,85,73	9,22,14,15,7	61,76,70,54,45	244	122	1.42109e-14	2.9721e-12	0.325,0.227,0.301,0.227,0.339	0.069,0.126,0.091,0.122,0.072	0.188	RI	chr7:126857225:126857787:126857225:126857342:126857675:126857787	258	324	67	306	582	373
31848	ENSMUSG00000032913	Lrig2	chr3	-	31848	64,28,47,27,70	0,0,1,0,0	60,27,40,31,39	2,17,1,0,9	244	122	3.75323e-08	2.70738e-06	1.0,1.0,0.959,1.0,1.0	0.937,0.443,0.952,1.0,0.684	0.189	SE	chr3:104462658:104462845:104461400:104461688:104463858:104464308	236	1	197	29	237	226
2078	ENSMUSG00000034858	Fam214a	chr9	+	2078	13,19,23,8,15	28,14,19,18,7	5,12,25,2,8	23,36,18,26,40	214	122	0.00269086	0.0378482	0.209,0.436,0.408,0.202,0.55	0.11,0.16,0.442,0.042,0.102	0.19	A5SS	chr9:75023584:75023746:75023584:75023653:75025650:75025847	78	86	52	143	164	195
519	ENSMUSG00000028484	Psip1	chr4	-	519	365537314353248	169207176180136	190313214154170	136328211251202	201	122	3.89322e-12	1.02651e-09	0.567,0.612,0.52,0.543,0.525	0.459,0.367,0.381,0.271,0.338	0.19	A3SS	chr4:83461870:83462553:83461870:83462473:83463594:83463713	1817	868	1041	1128	2685	2169
18449	ENSMUSG00000026074	Map4k4	chr1	+	18449	26,10,19,29,32	25,16,12,20,24	14,8,10,5,13	12,26,39,17,39	244	122	2.13255e-05	0.000808089	0.342,0.238,0.442,0.42,0.4	0.368,0.133,0.114,0.128,0.143	0.191	SE	chr1:40003762:40003987:40000530:40000749:40004806:40004910	116	97	50	133	213	183
13265	ENSMUSG00000039345	Mettl22	chr16	+	13265	146216225235222	31,19,26,15,31	54,99,73,69,79	19,30,23,31,36	162	122	1.74127e-12	2.16562e-10	0.78,0.895,0.867,0.922,0.844	0.682,0.713,0.705,0.626,0.623	0.192	SE	chr16:8482126:8482167:8477966:8478329:8482255:8482400	1044	122	374	139	1166	513
17547	ENSMUSG00000003680	Taf6l	chr19	-	17547	9.6594e+16	7,0,0,1,0	584684637679868	77,91,96,73,74	244	122	0	0	0.986,1.0,1.0,0.998,1.0	0.791,0.79,0.768,0.823,0.854	0.192	SE	chr19:8773289:8773424:8773027:8773106:8774334:8774467	4984	8	3452	411	4992	3863
554	ENSMUSG00000064307	Lrrc51	chr7	-	554	21,34,34,24,18	1,4,4,1,1	48,55,84,38,21	14,26,5,9,5	244	122	0.000795192	0.0101673	0.913,0.81,0.81,0.923,0.9	0.632,0.514,0.894,0.679,0.677	0.192	RI	chr7:101912988:101913583:101912988:101913212:101913434:101913583	131	11	246	59	142	305
42200	ENSMUSG00000059518	Znhit1	chr5	-	42200	14,11,18,26,18	21,18,27,27,23	1,5,8,8,4	16,31,37,34,27	244	122	1.43315e-09	1.24965e-07	0.25,0.234,0.25,0.325,0.281	0.03,0.075,0.098,0.105,0.069	0.193	SE	chr5:136986125:136986255:136984878:136985049:136986810:136987232	87	116	26	145	203	171
35527	ENSMUSG00000020777	Acox1	chr11	-	35527	49,30,42,65,55	0,0,0,1,1	37,44,56,26,38	1,9,3,5,9	244	122	2.20902e-10	2.13758e-08	1.0,1.0,1.0,0.97,0.965	0.949,0.71,0.903,0.722,0.679	0.194	SE	chr11:116183463:116183624:116181912:116182020:116189414:116189575	241	2	201	27	243	228
14751	ENSMUSG00000032422	Snx14	chr9	-	14751	19,8,17,6,2	13,37,26,20,15	2,0,6,5,2	30,45,30,29,35	148	122	8.48003e-06	0.000360211	0.546,0.151,0.35,0.198,0.099	0.052,0.0,0.142,0.124,0.045	0.196	SE	chr9:88400722:88400749:88398238:88398371:88401919:88401978	52	111	15	169	163	184
14953	ENSMUSG00000026414	Tnnt2	chr1	+	14953	19,2,7,12,0	17,12,11,17,18	0,8,0,0,1	10,15,32,20,9	133	122	0.000474871	0.0113562	0.506,0.133,0.369,0.393,0.0	0.0,0.329,0.0,0.0,0.092	0.196	SE	chr1:135842014:135842026:135841900:135841911:135845554:135845644	40	75	9	86	115	95
19568	ENSMUSG00000020553	Pctp	chr11	-	19568	218179144166195	6,10,1,12,0	112154182198159	40,57,15,29,25	189	122	2.77556e-15	4.35247e-13	0.959,0.92,0.989,0.899,1.0	0.644,0.636,0.887,0.815,0.804	0.196	SE	chr11:89986092:89986160:89982664:89984756:89987195:89987367	902	29	805	166	931	971
41439	ENSMUSG00000015214	Mtmr1	chrX	+	41439	102,81,126,138,187	27,7,27,12,12	126,46,80,68,76	35,32,44,9,54	145	122	3.54611e-06	0.000167287	0.761,0.907,0.797,0.906,0.929	0.752,0.547,0.605,0.864,0.542	0.198	SE	chrX:71376886:71376910:71369798:71369904:71383199:71383275	634	85	396	174	719	570
22500	ENSMUSG00000029635	Cdk8	chr5	+	22500	121,87,65,99,50	5,3,7,2,0	100,81,102,94,81	0,27,34,10,26	244	122	5.08337e-06	0.000229179	0.924,0.935,0.823,0.961,1.0	1.0,0.6,0.6,0.825,0.609	0.202	SE	chr5:146292638:146292767:146286107:146286239:146295162:146295232	422	17	458	97	439	555
809	ENSMUSG00000015377	Dennd6b	chr15	-	809	44,92,93,77,95	4,6,5,9,10	37,51,69,50,47	11,19,11,9,18	244	122	2.1683e-06	9.33645e-05	0.846,0.885,0.903,0.811,0.826	0.627,0.573,0.758,0.735,0.566	0.202	RI	chr15:89186955:89187243:89186955:89186998:89187147:89187243	401	34	254	68	435	322
28332	ENSMUSG00000031729	Ist1	chr8	-	28332	257266302334356	269301307330326	148129153202127	402624552564515	244	122	0	0	0.323,0.306,0.33,0.336,0.353	0.155,0.094,0.122,0.152,0.11	0.203	SE	chr8:109675642:109675802:109675375:109675424:109676757:109676850	1515	1533	759	2657	3048	3416
4929	ENSMUSG00000026305	Lrrfip1	chr1	+	4929	9,24,13,8,18	44,21,42,52,53	0,0,0,1,0	17,18,10,28,39	172	122	1.05582e-13	1.45447e-11	0.127,0.448,0.18,0.098,0.194	0.0,0.0,0.0,0.025,0.0	0.204	SE	chr1:91079030:91079081:91068562:91068649:91084945:91085005	72	212	1	112	284	113
24409	ENSMUSG00000097145	9230114K14Rik	chr5	+	24409	8,16,13,24,20	0,0,0,3,0	11,10,13,8,5	0,4,0,4,2	182	122	5.91489e-05	0.001972	1.0,1.0,1.0,0.843,1.0	1.0,0.626,1.0,0.573,0.626	0.204	SE	chr5:52192917:52192978:52190671:52190937:52196892:52197023	81	3	47	10	84	57
40186	ENSMUSG00000045273	Cenph	chr13	-	40186	41,39,16,44,11	3,5,0,0,9	20,24,34,34,43	10,7,19,21,7	173	122	0.000492242	0.0116872	0.906,0.846,1.0,1.0,0.463	0.585,0.707,0.558,0.533,0.812	0.204	SE	chr13:100763549:100763601:100759673:100760194:100766824:100766881	151	17	155	64	168	219
8110	ENSMUSG00000111422	1700027J07Rik	chr10	+	8110	183178213244312	0,48,50,44,0	244208142265172	57,49,76,68,75	244	122	1.34884e-06	7.02282e-05	1.0,0.65,0.681,0.735,1.0	0.682,0.68,0.483,0.661,0.534	0.205	SE	chr10:43763496:43763685:43746157:43746655:43764795:43765058	1130	142	1031	325	1272	1356
1797	ENSMUSG00000039473	Ubn1	chr16	+	1797	127,61,135,56,86	14,2,37,26,20	32,46,77,48,60	27,24,29,38,12	211	122	0.00183573	0.0354753	0.84,0.946,0.678,0.555,0.713	0.407,0.526,0.606,0.422,0.743	0.206	SE	chr16:5081893:5081983:5081417:5081661:5084055:5086285	465	99	263	130	564	393
11748	ENSMUSG00000035152	Ap2b1	chr11	+	11748	182105128163148	143,82,147,124,162	88,78,104,53,85	168184237164174	163	122	1.11022e-16	1.9404e-14	0.488,0.489,0.395,0.496,0.406	0.282,0.241,0.247,0.195,0.268	0.208	SE	chr11:83364794:83364836:83350978:83351171:83365646:83365793	726	658	408	927	1384	1335
36167	ENSMUSG00000022641	Bbx	chr16	-	36167	90,93,101,110,80	135,76,144,128,122	14,9,17,8,56	74104114141114	235	122	0	0	0.257,0.388,0.267,0.309,0.254	0.089,0.043,0.072,0.029,0.203	0.208	SE	chr16:50320299:50320413:50280368:50280539:50331028:50331102	474	605	104	547	1079	651
68	ENSMUSG00000018442	Derl2	chr11	-	68	30,16,28,9,25	2,0,2,0,2	16,14,29,7,25	2,6,3,5,0	244	122	0.00240776	0.0236574	0.882,1.0,0.875,1.0,0.862	0.8,0.538,0.829,0.412,1.0	0.208	RI	chr11:71013442:71015800:71013442:71013638:71015726:71015800	108	6	91	16	114	107
33281	ENSMUSG00000055447	Cd47	chr16	+	33281	24,44,40,63,56	174,77,86,71,69	8,13,13,22,6	101130103124109	166	122	1.53988e-12	1.92723e-10	0.092,0.296,0.255,0.395,0.374	0.055,0.068,0.085,0.115,0.039	0.21	SE	chr16:49899855:49899900:49898039:49898132:49910868:49911091	227	477	62	567	704	629
4661	ENSMUSG00000003269	Cyth2	chr7	-	4661	51,47,46,41,57	79,65,65,85,65	37,40,53,41,24	128234179151136	124	122	8.87068e-14	2.92363e-11	0.388,0.416,0.41,0.322,0.463	0.221,0.144,0.226,0.211,0.148	0.21	A3SS	chr7:45808372:45808452:45808372:45808449:45810126:45810238	242	359	195	828	601	1023
12710	ENSMUSG00000000340	Dbt	chr3	+	12710	27,11,17,14,35	0,0,0,0,0	7,15,15,7,37	2,7,2,0,0	244	122	2.79378e-05	0.00102167	1.0,1.0,1.0,1.0,1.0	0.636,0.517,0.789,1.0,1.0	0.212	SE	chr3:116520236:116520360:116513069:116513191:116533254:116533436	104	0	81	11	104	92
2684	ENSMUSG00000020721	Helz	chr11	+	2684	24,31,35,28,33	54,11,45,28,43	12,10,13,17,12	46,29,29,28,47	124	122	0.000841797	0.018704	0.304,0.735,0.434,0.496,0.43	0.204,0.253,0.306,0.374,0.201	0.212	A3SS	chr11:107627349:107627454:107627352:107627454:107626534:107626714	151	181	64	179	332	243
14346	ENSMUSG00000028184	Adgrl2	chr3	-	14346	6,7,20,14,17	49,11,39,8,37	6,0,5,2,5	35,25,23,16,29	160	122	0.000143013	0.00418738	0.085,0.327,0.281,0.572,0.259	0.116,0.0,0.142,0.087,0.116	0.213	SE	chr3:148849765:148849804:148846848:148847032:148850835:148851021	64	144	18	128	208	146
4359	ENSMUSG00000056211	R3hdm1	chr1	+	4359	26,15,40,42,27	71,24,48,39,51	12,6,1,2,13	68,75,87,73,71	223	122	0	0	0.167,0.255,0.313,0.371,0.225	0.088,0.042,0.006,0.015,0.091	0.218	SE	chr1:128190637:128190739:128186757:128186909:128193459:128193756	150	233	34	374	383	408
6483	ENSMUSG00000023994	Nfya	chr17	-	6483	24,13,27,38,21	34,14,52,27,34	4,13,8,17,11	36,53,45,63,54	202	122	2.27729e-09	1.95561e-07	0.299,0.359,0.239,0.459,0.272	0.063,0.129,0.097,0.14,0.11	0.218	SE	chr17:48398984:48399065:48395649:48395796:48400437:48400580	123	161	53	251	284	304
30420	ENSMUSG00000032812	Arap1	chr7	+	30420	18,16,26,15,28	0,0,0,0,0	16,12,21,9,24	0,0,17,4,0	244	122	2.07161e-05	0.000785747	1.0,1.0,1.0,1.0,1.0	1.0,1.0,0.382,0.529,1.0	0.218	SE	chr7:101384861:101385040:101378368:101378532:101386148:101386198	103	0	82	21	103	103
35081	ENSMUSG00000034903	Cobll1	chr2	-	35081	97,57,61,56,99	25,11,22,16,23	33,31,49,32,52	22,22,28,25,27	235	122	8.69359e-07	4.73777e-05	0.668,0.729,0.59,0.645,0.691	0.438,0.422,0.476,0.399,0.5	0.218	SE	chr2:65105714:65105828:65103159:65103394:65107011:65107086	370	97	197	124	467	321
44885	ENSMUSG00000040097	Flywch1	chr17	-	44885	34,26,39,46,41	22,45,40,47,32	14,13,16,10,8	34,53,43,37,30	219	122	4.91618e-09	4.02154e-07	0.463,0.243,0.352,0.353,0.416	0.187,0.12,0.172,0.131,0.129	0.218	SE	chr17:23770234:23770332:23762975:23763318:23771414:23771602	186	186	61	197	372	258
1858	ENSMUSG00000019302	Atp6v0a1	chr11	+	1858	13,10,10,7,10	11,12,7,10,7	2,3,8,6,6	19,4,23,13,11	142	122	0.00103059	0.0219138	0.504,0.417,0.551,0.376,0.551	0.083,0.392,0.23,0.284,0.319	0.218	A3SS	chr11:101026659:101026763:101026680:101026763:101021053:101021182	50	47	25	70	97	95
48150	ENSMUSG00000028613	Lrp8	chr4	+	48150	64,33,65,53,89	32,11,18,22,23	33,8,30,17,30	17,20,14,42,15	244	122	0.00106384	0.0224386	0.5,0.6,0.644,0.546,0.659	0.493,0.167,0.517,0.168,0.5	0.221	SE	chr4:107870011:107870188:107868977:107869150:107872272:107872346	304	106	118	108	410	226
5222	ENSMUSG00000055897	Ppp4r1l-ps	chr2	-	5222	23,5,10,8,6	19,11,6,5,10	0,2,11,3,7	32,20,16,13,16	244	122	3.00052e-05	0.0015674	0.377,0.185,0.455,0.444,0.231	0.0,0.048,0.256,0.103,0.179	0.221	A3SS	chr2:173615482:173616423:173615482:173615576:173659322:173659367	52	51	23	97	103	120
1317	ENSMUSG00000053964	Lgals4	chr7	+	1317	10,5,7,2,14	12,24,3,13,9	0,5,4,0,3	32,13,23,11,7	202	122	0.000261017	0.00565855	0.335,0.112,0.585,0.085,0.484	0.0,0.189,0.095,0.0,0.206	0.222	A5SS	chr7:28840580:28840691:28840580:28840610:28840863:28840952	38	61	12	86	99	98
46964	ENSMUSG00000043987	Cep164	chr9	-	46964	11,7,27,17,10	0,0,1,0,0	14,4,25,9,22	0,8,1,2,0	244	122	0.000910184	0.0197128	1.0,1.0,0.931,1.0,1.0	1.0,0.2,0.926,0.692,1.0	0.223	SE	chr9:45803172:45803328:45802642:45802777:45809703:45809908	72	1	74	11	73	85
18447	ENSMUSG00000026074	Map4k4	chr1	+	18447	44,18,30,43,36	25,16,12,20,24	16,14,18,8,21	12,26,39,17,39	244	122	3.93228e-06	0.00018354	0.468,0.36,0.556,0.518,0.429	0.4,0.212,0.188,0.19,0.212	0.226	SE	chr1:40003756:40003987:40000530:40000749:40004806:40004913	171	97	77	133	268	210
18451	ENSMUSG00000026074	Map4k4	chr1	+	18451	59,43,82,83,64	1,0,0,0,0	25,46,65,36,66	13,20,14,3,16	130	122	0	0	0.982,1.0,1.0,1.0,1.0	0.643,0.683,0.813,0.918,0.795	0.226	SE	chr1:40008330:40008339:40007432:40007530:40009687:40009863	331	1	238	66	332	304
3110	ENSMUSG00000052337	Immt	chr6	+	3110	1.30614e+19	193,89,90,108,105	8.62102e+16	363446503394368	136	122	0	0	0.859,0.935,0.924,0.914,0.902	0.681,0.672,0.668,0.687,0.69	0.227	SE	chr6:71866725:71866740:71863140:71863270:71868579:71868803	6330	585	4890	2074	6915	6964
22564	ENSMUSG00000029461	Fam168a	chr7	+	22564	6,8,4,12,1	15,17,8,19,14	3,0,0,0,0	27,9,36,19,23	148	122	1.78995e-11	1.96172e-09	0.248,0.279,0.292,0.342,0.056	0.084,0.0,0.0,0.0,0.0	0.227	SE	chr7:100818735:100818762:100812919:100813000:100824131:100824257	31	73	3	114	104	117
10385	ENSMUSG00000028931	Kcnab2	chr4	-	10385	104,67,108,109,95	117,78,114,138,113	25,41,44,32,29	90124155145137	163	122	0	0	0.4,0.391,0.415,0.372,0.386	0.172,0.198,0.175,0.142,0.137	0.228	SE	chr4:152434781:152434823:152412816:152412860:152435804:152435937	483	560	171	651	1043	822
15251	ENSMUSG00000000827	Tpd52l2	chr2	+	15251	416494430531446	415329339396401	319303282246278	539739611751595	163	122	0	0	0.429,0.529,0.487,0.501,0.454	0.307,0.235,0.257,0.197,0.259	0.229	SE	chr2:181511573:181511615:181508165:181508267:181513038:181513056	2317	1880	1428	3235	4197	4663
4884	ENSMUSG00000036435	Exoc1	chr5	+	4884	32,28,41,38,32	86,89,85,118,106	0,0,0,0,3	98110129122147	142	122	0	0	0.242,0.213,0.293,0.217,0.206	0.0,0.0,0.0,0.0,0.017	0.231	SE	chr5:76540746:76540767:76537697:76537857:76542050:76542238	171	484	3	606	655	609
15442	ENSMUSG00000032114	Slc37a4	chr9	+	15442	19,26,29,37,25	88,43,44,71,67	0,0,0,0,1	63,80,84,86,70	184	122	0	0	0.125,0.286,0.304,0.257,0.198	0.0,0.0,0.0,0.0,0.009	0.232	SE	chr9:44401706:44401769:44401420:44401534:44402072:44402211	136	313	1	383	449	384
48352	ENSMUSG00000042772	Smg7	chr1	-	48352	58,30,76,31,55	83,32,89,66,65	2,0,20,4,14	90,50,91,46,124	244	122	0	0	0.259,0.319,0.299,0.19,0.297	0.011,0.0,0.099,0.042,0.053	0.232	SE	chr1:152843229:152843379:152841512:152841593:152844035:152844407	250	335	40	401	585	441
811	ENSMUSG00000025006	Sorbs1	chr19	-	811	64,22,34,41,67	18,12,21,21,13	17,27,15,18,24	21,34,47,14,12	244	122	9.66334e-05	0.00300457	0.64,0.478,0.447,0.494,0.72	0.288,0.284,0.138,0.391,0.5	0.236	SE	chr19:40321792:40321960:40318021:40318068:40324746:40324832	228	85	101	128	313	229
18166	ENSMUSG00000058835	Abi1	chr2	-	18166	293279303347256	62,35,37,45,34	240180309217258	108,103,121,73,102	244	122	0	0	0.703,0.799,0.804,0.794,0.79	0.526,0.466,0.561,0.598,0.558	0.236	SE	chr2:22953434:22953611:22946575:22946761:22957017:22957118	1478	213	1204	507	1691	1711
23777	ENSMUSG00000001105	Ift20	chr11	+	23777	539720640692694	27,17,27,31,25	520715477608515	116181115104119	244	122	0	0	0.909,0.955,0.922,0.918,0.933	0.691,0.664,0.675,0.745,0.684	0.236	SE	chr11:78538509:78538738:78536360:78536576:78538833:78538962	3285	127	2835	635	3412	3470
26061	ENSMUSG00000057469	E2f6	chr12	+	26061	52,89,72,109,67	46,36,53,29,64	5,43,30,53,24	53,41,75,32,53	205	122	0.000171568	0.00488994	0.402,0.595,0.447,0.691,0.384	0.053,0.384,0.192,0.496,0.212	0.236	SE	chr12:16812288:16812372:16810962:16811315:16813846:16813912	389	228	155	254	617	409
18489	ENSMUSG00000032806	Slc10a3	chrX	-	18489	97,94,77,80,76	5,14,4,10,11	37,54,76,39,50	19,14,29,14,22	190	122	6.55448e-10	5.99235e-08	0.926,0.812,0.925,0.837,0.816	0.556,0.712,0.627,0.641,0.593	0.237	SE	chrX:74372613:74372682:74369216:74371011:74373190:74373349	424	44	256	98	468	354
2806	ENSMUSG00000039262	Prrc2b	chr2	+	2806	8,15,34,19,26	5,11,9,10,10	6,8,10,16,17	13,20,17,10,17	244	122	0.000243577	0.00656055	0.444,0.405,0.654,0.487,0.565	0.188,0.167,0.227,0.444,0.333	0.239	SE	chr2:32212886:32214947:32212074:32212291:32216045:32216233	102	45	57	77	147	134
3923	ENSMUSG00000038685	Rtel1	chr2	+	3923	43,31,57,32,59	7,2,12,11,6	38,26,42,33,38	13,18,14,16,23	244	122	0.000107441	0.00217639	0.754,0.886,0.704,0.593,0.831	0.594,0.419,0.6,0.508,0.452	0.239	RI	chr2:181354352:181355552:181354352:181354442:181355327:181355552	222	38	177	84	260	261
40109	ENSMUSG00000029528	Pxn	chr5	+	40109	121107134180140	123,114,135,135,89	38,44,57,56,55	160159179163142	223	122	0	0	0.35,0.339,0.352,0.422,0.463	0.115,0.131,0.148,0.158,0.175	0.24	SE	chr5:115551487:115551589:115546812:115546948:115551850:115552021	682	596	250	803	1278	1053
18164	ENSMUSG00000058835	Abi1	chr2	-	18164	294279249379251	62,35,37,45,34	275147307176279	108,103,121,73,102	244	122	1.11022e-16	1.9404e-14	0.703,0.799,0.771,0.808,0.787	0.56,0.416,0.559,0.547,0.578	0.242	SE	chr2:22953434:22953608:22946575:22946761:22957017:22957118	1452	213	1184	507	1665	1691
31397	ENSMUSG00000041718	Alg13	chrX	+	31397	24,12,27,28,28	0,4,0,0,0	9,15,8,7,8	2,5,11,0,1	244	122	5.226e-06	0.000234809	1.0,0.6,1.0,1.0,1.0	0.692,0.6,0.267,1.0,0.8	0.248	SE	chrX:144336111:144336463:144322011:144322150:144337091:144337175	119	4	47	19	123	66
15250	ENSMUSG00000000827	Tpd52l2	chr2	+	15250	151209193184146	305327291345298	12,33,32,2,12	225215197183210	148	122	0	0	0.29,0.345,0.353,0.305,0.288	0.042,0.112,0.118,0.009,0.045	0.251	SE	chr2:181510503:181510530:181508165:181508267:181511573:181511615	883	1566	91	1030	2449	1121
33086	ENSMUSG00000046985	Tapt1	chr5	-	33086	90,64,96,103,76	8,2,10,8,9	80,69,58,54,64	15,33,20,32,23	187	122	3.85085e-11	4.0311e-09	0.88,0.954,0.862,0.894,0.846	0.777,0.577,0.654,0.524,0.645	0.252	SE	chr5:44199312:44199378:44194247:44194410:44218103:44218212	429	37	325	123	466	448
24506	ENSMUSG00000020882	Cacnb1	chr11	-	24506	19,23,26,28,17	6,7,8,7,11	11,4,13,12,11	10,10,7,8,17	141	122	0.000907969	0.0196846	0.733,0.74,0.738,0.776,0.572	0.488,0.257,0.616,0.565,0.359	0.255	SE	chr11:98010626:98010646:98010295:98010376:98011865:98011942	113	39	51	52	152	103
31287	ENSMUSG00000027763	Mbnl1	chr3	+	31287	69,50,89,79,61	23,24,18,20,18	52,51,95,47,40	53,41,71,39,43	175	122	2.14527e-10	2.08607e-08	0.677,0.592,0.775,0.734,0.703	0.406,0.464,0.483,0.457,0.393	0.256	SE	chr3:60614682:60614736:60613262:60613520:60615724:60615773	348	103	285	247	451	532
33897	ENSMUSG00000039747	Orai2	chr5	-	33897	36,23,44,48,44	17,6,17,9,9	17,11,32,21,21	16,12,13,15,29	230	122	0.000104418	0.00321887	0.529,0.67,0.579,0.739,0.722	0.36,0.327,0.566,0.426,0.278	0.256	SE	chr5:136168365:136168474:136161486:136161724:136170537:136170628	195	58	102	85	253	187
8458	ENSMUSG00000027605	Acss2	chr2	+	8458	11,18,8,8,15	17,9,21,10,36	0,9,1,3,1	19,23,9,14,18	160	122	2.59644e-05	0.000960246	0.33,0.604,0.225,0.379,0.241	0.0,0.23,0.078,0.14,0.041	0.258	SE	chr2:155551189:155551228:155550354:155550469:155555853:155555991	60	93	14	83	153	97
29073	ENSMUSG00000049295	Zfp219	chr14	-	29073	22,19,29,18,40	2,2,1,1,0	10,15,25,9,23	2,6,6,3,9	210	122	1.2003e-07	7.87677e-06	0.865,0.847,0.944,0.913,1.0	0.744,0.592,0.708,0.635,0.598	0.258	SE	chr14:52009969:52010058:52008227:52009662:52020522:52020733	128	6	82	26	134	108
1067	ENSMUSG00000024948	Map4k2	chr19	+	1067	9,4,16,7,17	4,15,14,18,18	1,4,6,1,3	24,11,15,9,11	124	122	0.000836493	0.0186911	0.689,0.208,0.529,0.277,0.482	0.039,0.263,0.282,0.099,0.212	0.258	A3SS	chr19:6341766:6341834:6341769:6341834:6341458:6341516	53	69	15	70	122	85
5009	ENSMUSG00000001138	Cnnm3	chr1	+	5009	41,29,44,49,40	41,26,40,69,59	7,7,9,22,5	61,100,61,63,63	220	122	0	0	0.357,0.382,0.379,0.283,0.273	0.06,0.037,0.076,0.162,0.042	0.259	SE	chr1:36524033:36524132:36521700:36521839:36525165:36528237	203	235	50	348	438	398
26027	ENSMUSG00000022515	Anks3	chr16	-	26027	25,18,37,37,32	0,0,0,4,0	29,21,21,45,21	12,7,7,0,3	244	122	7.89477e-08	5.37251e-06	1.0,1.0,1.0,0.822,1.0	0.547,0.6,0.6,1.0,0.778	0.259	SE	chr16:4960396:4960568:4957640:4957762:4964119:4964173	149	4	137	29	153	166
36486	ENSMUSG00000028522	Mier1	chr4	+	36486	36,27,8,20,22	8,6,5,9,16	12,13,12,4,15	9,14,12,11,19	198	122	0.00048969	0.0116335	0.735,0.735,0.496,0.578,0.459	0.451,0.364,0.381,0.183,0.327	0.259	SE	chr4:103118238:103118315:103115271:103115660:103127272:103127297	113	44	56	65	157	121
3191	ENSMUSG00000023235	Ccl25	chr8	+	3191	7,13,8,7,3	0,0,0,0,0	25,5,34,20,13	9,0,14,9,3	164	122	4.45252e-11	6.57581e-09	1.0,1.0,1.0,1.0,1.0	0.674,1.0,0.644,0.623,0.763	0.259	A5SS	chr8:4327756:4327893:4327756:4327850:4333122:4333299	38	0	97	35	38	132
12338	ENSMUSG00000002105	Slc39a13	chr2	-	12338	51,79,43,82,66	7,2,5,5,2	25,45,40,64,32	8,14,27,6,14	223	122	2.107e-07	1.31774e-05	0.799,0.956,0.825,0.9,0.948	0.631,0.637,0.448,0.854,0.556	0.26	SE	chr2:91064905:91065007:91064640:91064804:91065581:91065700	321	21	206	69	342	275
1245	ENSMUSG00000025188	Hps1	chr19	-	1245	36,18,24,38,34	59,29,56,40,24	6,1,2,1,4	92148103107111	244	122	0	0	0.234,0.237,0.176,0.322,0.415	0.032,0.003,0.01,0.005,0.018	0.263	RI	chr19:42756257:42757906:42756257:42756340:42757792:42757906	150	208	14	561	358	575
18168	ENSMUSG00000058835	Abi1	chr2	-	18168	213257260269286	161209211182216	137116145114167	292308336316331	136	122	0	0	0.543,0.525,0.525,0.57,0.543	0.296,0.253,0.279,0.244,0.312	0.264	SE	chr2:22963213:22963228:22962400:22962501:22971082:22971259	1285	979	679	1583	2264	2262
35987	ENSMUSG00000052407	Ccdc171	chr4	+	35987	17,15,24,17,56	0,0,3,1,1	17,11,9,8,20	3,0,3,5,8	244	122	3.25732e-06	0.000154767	1.0,1.0,0.8,0.895,0.966	0.739,1.0,0.6,0.444,0.556	0.264	SE	chr4:83557898:83558030:83554693:83554884:83580747:83580894	129	5	65	19	134	84
567	ENSMUSG00000030374	Strn4	chr7	+	567	95139156146155	122,106,93,102,102	65,86,86,62,55	163214204156117	142	122	0	0	0.401,0.53,0.59,0.552,0.566	0.255,0.257,0.266,0.255,0.288	0.264	A3SS	chr7:16831464:16831580:16831485:16831580:16831024:16831138	691	525	354	854	1216	1208
31424	ENSMUSG00000021286	Zfyve21	chr12	+	31424	69,64,50,58,40	138,96,63,93,49	10,8,24,9,9	114157168141170	175	122	0	0	0.258,0.317,0.356,0.303,0.363	0.058,0.034,0.091,0.043,0.036	0.267	SE	chr12:111825578:111825632:111825016:111825108:111827542:111827685	281	439	60	750	720	810
22697	ENSMUSG00000071650	Ganab	chr19	+	22697	226233251253228	292187230279205	98,88,117,59,81	389389405353383	187	122	0	0	0.336,0.448,0.416,0.372,0.42	0.141,0.129,0.159,0.098,0.121	0.269	SE	chr19:8907850:8907916:8907214:8907394:8908677:8908747	1191	1193	443	1919	2384	2362
38864	ENSMUSG00000000782	Tcf7	chr11	-	38864	12,13,14,7,19	10,6,16,4,12	8,3,2,6,4	11,10,17,22,6	214	122	1.77534e-05	0.0006865	0.406,0.553,0.333,0.499,0.474	0.293,0.146,0.063,0.135,0.275	0.271	SE	chr11:52258852:52258945:52257683:52257803:52260530:52260621	65	48	23	66	113	89
29776	ENSMUSG00000002010	Idh3g	chrX	-	29776	9.0811e+17	47,30,27,30,24	603861769804817	244327320423267	133	122	0	0	0.947,0.971,0.966,0.972,0.975	0.694,0.707,0.688,0.636,0.737	0.274	SE	chrX:73782297:73782309:73782005:73782103:73782674:73782716	4991	158	3854	1581	5149	5435
43376	ENSMUSG00000025404	R3hdm2	chr10	+	43376	25,24,70,56,41	34,16,37,28,23	10,16,11,13,11	20,29,32,45,34	223	122	2.79153e-10	2.6559e-08	0.287,0.451,0.509,0.522,0.494	0.215,0.232,0.158,0.136,0.15	0.274	SE	chr10:127481692:127481794:127476519:127476698:127483975:127484218	216	138	61	160	354	221
30654	ENSMUSG00000030629	Zfand6	chr7	-	30654	12,10,7,10,16	7,9,9,11,5	7,9,2,12,7	15,42,20,31,19	244	122	2.68023e-06	0.000129151	0.462,0.357,0.28,0.312,0.615	0.189,0.097,0.048,0.162,0.156	0.275	SE	chr7:84642285:84642437:84634238:84634409:84652881:84653042	55	41	37	127	96	164
30585	ENSMUSG00000028459	Cd72	chr4	-	30585	246194213187290	40,54,34,33,55	184191266196184	177144121102129	193	122	0	0	0.795,0.694,0.798,0.782,0.769	0.397,0.456,0.582,0.548,0.474	0.276	SE	chr4:43453640:43453712:43452600:43452639:43454241:43454349	1130	216	1021	673	1346	1694
33921	ENSMUSG00000027940	Tpm3	chr3	+	33921	3.07929e+19	2.77823e+19	9.93141e+18	3.41141e+19	200	122	0	0	0.403,0.439,0.451,0.44,0.422	0.151,0.175,0.137,0.156,0.154	0.276	SE	chr3:90091012:90091091:90090009:90090079:90099527:90100896	15400	12423	5920	19835	27823	25755
48351	ENSMUSG00000022517	Mgrn1	chr16	+	48351	130120118123145	73,74,101,114,100	41,33,67,76,50	120132130123138	166	122	0	0	0.567,0.544,0.462,0.442,0.516	0.201,0.155,0.275,0.312,0.21	0.276	SE	chr16:4934194:4934239:4932199:4932298:4936895:4937421	636	462	267	643	1098	910
13657	ENSMUSG00000041132	N4bp2l1	chr5	-	13657	9,18,18,16,6	7,15,7,12,15	2,8,5,13,12	35,67,27,40,24	244	122	2.92678e-08	2.16233e-06	0.391,0.375,0.563,0.4,0.167	0.028,0.056,0.085,0.14,0.2	0.277	SE	chr5:150577171:150577299:150576639:150576767:150594263:150594462	67	56	40	193	123	233
22716	ENSMUSG00000052539	Magi3	chr3	-	22716	12,12,6,7,10	16,5,32,10,17	0,0,1,0,5	23,12,14,19,30	212	122	3.64847e-10	3.42197e-08	0.301,0.58,0.097,0.287,0.253	0.0,0.0,0.039,0.0,0.088	0.278	SE	chr3:104016601:104016692:104013258:104016068:104017500:104017639	47	80	6	98	127	104
4900	ENSMUSG00000024826	Dpf2	chr19	-	4900	308340359499373	574545619676668	36,62,31,49,15	6.40102e+15	163	122	0	0	0.287,0.318,0.303,0.356,0.295	0.04,0.043,0.023,0.036,0.017	0.28	SE	chr19:5903730:5903772:5902630:5902768:5904239:5904318	1879	3082	193	4300	4961	4493
32121	ENSMUSG00000035992	Fnip1	chr11	+	32121	19,5,12,11,41	10,8,17,13,9	1,12,3,3,0	6,6,30,23,25	205	122	1.49616e-05	0.000591222	0.531,0.271,0.296,0.335,0.731	0.09,0.543,0.056,0.072,0.0	0.281	SE	chr11:54487711:54487795:54482494:54482586:54489268:54489340	88	57	19	90	145	109
10157	ENSMUSG00000020458	Rtn4	chr11	+	10157	91,92,150,128,86	2,1,3,8,2	19,39,36,30,28	8,14,4,6,7	244	122	9.51139e-12	1.07203e-09	0.958,0.979,0.962,0.889,0.956	0.543,0.582,0.818,0.714,0.667	0.284	SE	chr11:29706409:29708770:29705534:29705591:29733632:29733840	547	16	152	39	563	191
2875	ENSMUSG00000030263	Lrmp	chr6	+	2875	2.9883e+19	1.51012e+19	1.7112e+19	2.70931e+19	244	122	0	0	0.497,0.555,0.494,0.561,0.493	0.24,0.244,0.241,0.217,0.234	0.285	A5SS	chr6:145137459:145138086:145137459:145137607:145138181:145138263	15366	7109	9034	14676	22475	23710
24358	ENSMUSG00000036381	P2ry14	chr3	-	24358	15,25,14,13,9	4,0,0,1,0	12,27,14,20,14	2,17,12,0,8	225	122	1.58191e-05	0.000619553	0.67,1.0,1.0,0.876,1.0	0.765,0.463,0.387,1.0,0.487	0.289	SE	chr3:59116187:59116291:59114624:59116061:59130493:59130624	76	5	87	39	81	126
33962	ENSMUSG00000034647	Ankrd12	chr17	-	33962	122146174182140	72,74,105,68,108	61,49,66,74,50	116,120,113,144,96	190	122	0	0	0.521,0.559,0.516,0.632,0.454	0.252,0.208,0.273,0.248,0.251	0.29	SE	chr17:66042532:66042601:66036797:66037639:66049785:66049933	764	427	300	589	1191	889
39367	ENSMUSG00000030263	Lrmp	chr6	+	39367	1.77722e+19	1.51012e+19	9.54116e+18	2.70931e+19	162	122	0	0	0.47,0.574,0.458,0.553,0.462	0.21,0.222,0.213,0.209,0.209	0.291	SE	chr6:145138045:145138086:145137459:145137607:145138181:145138263	9592	7109	5272	14676	16701	19948
30614	ENSMUSG00000039361	Picalm	chr7	+	30614	170134234211147	30,17,20,14,12	89,96,101,52,106	21,40,50,54,32	244	122	2.77514e-10	2.64855e-08	0.739,0.798,0.854,0.883,0.86	0.679,0.545,0.502,0.325,0.624	0.292	SE	chr7:90182218:90182368:90177499:90177603:90189149:90189257	896	93	444	197	989	641
45863	ENSMUSG00000031256	Cstf2	chrX	+	45863	15,17,6,11,15	7,20,19,13,4	1,2,1,1,2	11,3,9,8,7	208	122	4.40566e-06	0.000203718	0.557,0.333,0.156,0.332,0.687	0.051,0.281,0.061,0.068,0.144	0.292	SE	chrX:134072677:134072764:134072414:134072474:134073135:134073277	64	63	7	38	127	45
10155	ENSMUSG00000020458	Rtn4	chr11	+	10155	12,13,14,16,9	9,10,13,15,8	9,17,9,6,8	33,37,38,45,34	178	122	2.69726e-09	2.29637e-07	0.477,0.471,0.425,0.422,0.435	0.157,0.239,0.14,0.084,0.139	0.294	SE	chr11:29705534:29705591:29692946:29693693:29733632:29733840	64	55	49	187	119	236
2445	ENSMUSG00000002010	Idh3g	chrX	-	2445	47,31,35,45,52	47,30,27,30,24	105,36,37,104,88	244327320423267	244	122	0	0	0.333,0.341,0.393,0.429,0.52	0.177,0.052,0.055,0.109,0.141	0.296	RI	chrX:73782005:73782716:73782005:73782103:73782674:73782716	210	158	370	1581	368	1951
44753	ENSMUSG00000024958	Gpr137	chr19	-	44753	23,34,18,50,57	28,28,17,26,32	4,4,11,16,12	36,44,50,49,32	244	122	2.22045e-16	3.78086e-14	0.291,0.378,0.346,0.49,0.471	0.053,0.043,0.099,0.14,0.158	0.297	SE	chr19:6939528:6939754:6939260:6939410:6940351:6940401	182	131	47	211	313	258
368	ENSMUSG00000027244	Atg13	chr2	-	368	64,57,72,63,52	89,51,60,96,87	2,0,0,0,3	78,105,133,83,108	232	122	0	0	0.274,0.37,0.387,0.257,0.239	0.013,0.0,0.0,0.0,0.014	0.3	SE	chr2:91682025:91682136:91681558:91681695:91684668:91684759	308	383	5	507	691	512
48235	ENSMUSG00000022841	Ap2m1	chr16	+	48235	1.98824e+19	304239266240311	1.35024e+19	1.14214e+19	127	122	0	0	0.863,0.906,0.883,0.906,0.865	0.532,0.624,0.577,0.591,0.6	0.3	SE	chr16:20540807:20540813:20540332:20540415:20540974:20541110	10953	1360	9016	6065	12313	15081
5939	ENSMUSG00000061751	Kalrn	chr16	-	5939	10,7,8,12,11	3,12,4,6,7	9,4,4,8,1	9,11,12,8,15	124	122	0.00235827	0.0399713	0.766,0.365,0.663,0.663,0.607	0.496,0.263,0.247,0.496,0.062	0.3	A3SS	chr16:34013957:34014214:34013957:34014211:34016391:34016630	48	32	26	55	80	81
6482	ENSMUSG00000023994	Nfya	chr17	-	6482	40,42,53,53,51	34,14,52,27,34	18,23,14,22,18	36,53,45,63,54	208	122	7.40874e-12	8.44639e-10	0.408,0.638,0.374,0.535,0.468	0.227,0.203,0.154,0.17,0.164	0.301	SE	chr17:48398981:48399068:48395649:48395796:48400437:48400580	239	161	95	251	400	346
1222	ENSMUSG00000015377	Dennd6b	chr15	-	1222	22,46,30,39,36	4,6,5,9,10	15,14,33,17,12	11,19,11,9,18	173	122	6.4007e-06	0.000429064	0.795,0.844,0.809,0.753,0.717	0.49,0.342,0.679,0.571,0.32	0.303	A3SS	chr15:89186955:89187050:89186955:89186998:89187147:89187243	173	34	91	68	207	159
542	ENSMUSG00000038429	Usp5	chr6	-	542	361500491591531	639584581663598	43,82,35,42,60	8.50984e+15	190	122	0	0	0.266,0.355,0.352,0.364,0.363	0.031,0.051,0.018,0.033,0.038	0.306	A5SS	chr6:124818474:124818666:124818543:124818666:124817887:124818031	2474	3065	262	4786	5539	5048
3531	ENSMUSG00000021493	Pdlim7	chr13	-	3531	7,6,12,11,18	5,5,6,7,5	10,9,9,5,2	14,17,21,18,17	244	122	2.52109e-06	0.000105454	0.412,0.375,0.5,0.44,0.643	0.263,0.209,0.176,0.122,0.056	0.309	RI	chr13:55506305:55507366:55506305:55506367:55507329:55507366	54	28	35	87	82	122
2188	ENSMUSG00000040231	Syngr4	chr7	-	2188	10,18,21,18,9	5,2,3,2,8	2,6,5,3,4	2,6,9,7,1	244	122	0.00122527	0.0251611	0.5,0.818,0.778,0.818,0.36	0.333,0.333,0.217,0.176,0.667	0.31	SE	chr7:45887366:45887506:45886844:45887125:45888611:45888849	76	20	20	25	96	45
12175	ENSMUSG00000004980	Hnrnpa2b1	chr6	-	12175	1.93917e+19	683362395385350	1.63314e+19	1.29014e+19	244	122	0	0	0.587,0.697,0.666,0.68,0.682	0.388,0.331,0.342,0.325,0.346	0.316	SE	chr6:51461919:51462055:51461120:51461433:51463410:51463493	8317	2175	8231	7792	10492	16023
31918	ENSMUSG00000068735	Trp53i11	chr2	+	31918	492372607547631	240264367384456	149132128136101	420534446499398	244	122	0	0	0.506,0.413,0.453,0.416,0.409	0.151,0.11,0.125,0.12,0.113	0.316	SE	chr2:93189088:93189223:93187547:93187747:93196896:93196978	2649	1711	646	2297	4360	2943
2476	ENSMUSG00000029686	Cul1	chr6	+	2476	14,5,21,14,18	1,6,4,2,4	24,6,19,12,23	10,16,17,10,25	212	122	0.000837397	0.0182845	0.89,0.324,0.751,0.801,0.721	0.58,0.177,0.391,0.408,0.346	0.317	SE	chr6:47501698:47501789:47497220:47497388:47508225:47508388	72	17	84	78	89	162
4078	ENSMUSG00000007035	Msh5	chr17	-	4078	22,38,30,29,13	5,7,5,10,1	17,7,8,4,14	6,4,10,8,7	244	122	0.000516447	0.0132684	0.688,0.731,0.75,0.592,0.867	0.586,0.467,0.286,0.2,0.5	0.318	A3SS	chr17:35031678:35031902:35031678:35031756:35032340:35032421	132	28	50	35	160	85
25988	ENSMUSG00000049550	Clip1	chr5	-	25988	230218241326253	121,66,99,111,98	75,72,121,123,95	134152153136152	226	122	0	0	0.506,0.641,0.568,0.613,0.582	0.232,0.204,0.299,0.328,0.252	0.319	SE	chr5:123635173:123635278:123630224:123631169:123640493:123640554	1268	495	486	727	1763	1213
37945	ENSMUSG00000007411	Mark3	chr12	+	37945	309290314308295	210164169170151	145133168112159	299305365280366	166	122	0	0	0.52,0.565,0.577,0.571,0.589	0.263,0.243,0.253,0.227,0.242	0.319	SE	chr12:111653389:111653434:111647470:111647728:111655269:111655615	1516	864	717	1615	2380	2332
6481	ENSMUSG00000023994	Nfya	chr17	-	6481	39,30,48,62,49	34,14,52,27,34	9,24,9,17,17	36,53,45,63,54	205	122	1.76525e-14	2.63288e-12	0.406,0.56,0.355,0.577,0.462	0.13,0.212,0.106,0.138,0.158	0.323	SE	chr17:48398981:48399065:48395649:48395796:48400437:48400580	228	161	76	251	389	327
46693	ENSMUSG00000012123	Crybg2	chr4	+	46693	48,67,31,69,38	0,0,0,0,2	31,64,45,54,64	13,13,17,16,9	234	122	0	0	1.0,1.0,1.0,1.0,0.908	0.554,0.72,0.58,0.638,0.788	0.326	SE	chr4:134082574:134082687:134082311:134082447:134087485:134087502	253	2	258	68	255	326
5561	ENSMUSG00000005442	Cic	chr7	+	5561	10,4,10,11,14	1,3,19,7,9	4,1,2,3,3	10,11,3,12,4	124	122	0.000519124	0.0132684	0.908,0.567,0.341,0.607,0.605	0.282,0.082,0.396,0.197,0.425	0.329	A3SS	chr7:25291051:25291342:25291054:25291342:25290798:25290965	49	39	13	40	88	53
40740	ENSMUSG00000034274	Thoc5	chr11	+	40740	92,126,100,102,92	161144159149163	1,5,8,0,3	287329322335268	157	122	0	0	0.307,0.405,0.328,0.347,0.305	0.003,0.012,0.019,0.0,0.009	0.33	SE	chr11:4911434:4911470:4910626:4910759:4912780:4912858	512	776	17	1541	1288	1558
14827	ENSMUSG00000032966	Fkbp1a	chr2	+	14827	22,26,15,14,17	1,3,0,0,0	13,9,11,9,0	0,5,0,3,7	244	122	6.47435e-05	0.00213164	0.917,0.813,1.0,1.0,1.0	1.0,0.474,1.0,0.6,0.0	0.331	SE	chr2:151544012:151544140:151542817:151542865:151545424:151545515	94	4	42	15	98	57
1328	ENSMUSG00000034902	Pip5k1c	chr10	+	1328	131131166180155	103,66,105,63,99	41,45,42,51,58	125147156104126	199	122	0	0	0.438,0.549,0.492,0.637,0.49	0.167,0.158,0.142,0.231,0.22	0.338	SE	chr10:81317325:81317403:81314991:81315118:81317765:81318020	763	436	237	658	1199	895
40181	ENSMUSG00000029863	Casp2	chr6	+	40181	8,35,24,17,18	14,6,14,9,15	6,10,6,0,2	14,14,9,9,20	182	122	3.33743e-05	0.00118966	0.277,0.796,0.535,0.559,0.446	0.223,0.324,0.309,0.0,0.063	0.339	SE	chr6:42276869:42276930:42273916:42274045:42279776:42279926	102	58	24	66	160	90
4941	ENSMUSG00000026305	Lrrfip1	chr1	+	4941	83,59,96,125,125	55,69,46,67,62	15,2,4,2,2	13,8,39,18,24	214	122	7.88245e-11	7.95746e-09	0.462,0.328,0.543,0.515,0.535	0.397,0.125,0.055,0.06,0.045	0.34	SE	chr1:91108579:91108672:91107297:91107390:91110354:91110447	488	299	25	102	787	127
44630	ENSMUSG00000025728	Pigq	chr17	-	44630	16,27,13,14,21	2,2,4,4,1	14,5,42,13,10	5,15,4,10,26	244	122	0.000458225	0.011038	0.8,0.871,0.619,0.636,0.913	0.583,0.143,0.84,0.394,0.161	0.344	SE	chr17:25931673:25931827:25930957:25931038:25934757:25934878	91	13	84	60	104	144
14147	ENSMUSG00000019984	Med23	chr10	+	14147	35,34,38,29,40	16,29,33,44,30	19,4,12,11,25	59,23,71,45,100	139	122	6.31717e-14	8.95098e-12	0.658,0.507,0.503,0.366,0.539	0.22,0.132,0.129,0.177,0.18	0.347	SE	chr10:24883203:24883221:24882553:24882649:24888399:24888600	176	152	71	298	328	369
318	ENSMUSG00000029016	Clcn6	chr4	-	318	64,69,97,106,107	0,0,1,0,0	8,20,8,14,25	2,0,19,5,3	244	122	2.74502e-11	2.9434e-09	1.0,1.0,0.98,1.0,1.0	0.667,1.0,0.174,0.583,0.806	0.35	SE	chr4:148017495:148017662:148016851:148016978:148017902:148018016	443	1	75	29	444	104
16878	ENSMUSG00000041977	Arhgef11	chr3	+	16878	45,7,40,19,18	0,0,0,0,2	4,14,3,7,13	2,8,0,5,3	244	122	5.17436e-10	4.77413e-08	1.0,1.0,1.0,1.0,0.818	0.5,0.467,1.0,0.412,0.684	0.351	SE	chr3:87734423:87734552:87733147:87733504:87735344:87735571	129	2	41	18	131	59
41802	ENSMUSG00000035504	Reep6	chr10	+	41802	8,15,9,1,8	4,11,6,4,19	0,0,0,0,0	2,10,8,6,2	202	122	1.36624e-12	1.72077e-10	0.547,0.452,0.475,0.131,0.203	0.0,0.0,0.0,0.0,0.0	0.362	SE	chr10:80334712:80334793:80333965:80334134:80335109:80336440	41	44	0	28	85	28
40658	ENSMUSG00000027506	Tpd52	chr3	-	40658	98,177,91,102,63	80,96,84,129,88	9,3,5,1,3	48,52,23,29,54	163	122	0	0	0.478,0.58,0.448,0.372,0.349	0.123,0.041,0.14,0.025,0.04	0.372	SE	chr3:8936438:8936480:8934991:8935040:8943550:8943577	531	477	21	206	1008	227
11782	ENSMUSG00000006276	Eps15l1	chr8	-	11782	85,85,105,141,75	0,2,0,0,1	55,57,74,32,52	21,18,12,24,13	244	122	0	0	1.0,0.955,1.0,1.0,0.974	0.567,0.613,0.755,0.4,0.667	0.385	SE	chr8:72345965:72346171:72340998:72341524:72358312:72358445	491	3	270	88	494	358
31582	ENSMUSG00000026319	2310035C23Rik	chr1	+	31582	47,35,55,59,64	3,6,2,2,2	16,15,28,26,56	9,12,13,18,20	204	122	8.32667e-15	1.26089e-12	0.904,0.777,0.943,0.946,0.95	0.515,0.428,0.563,0.463,0.626	0.385	SE	chr1:105740434:105740517:105735922:105736022:105741012:105741095	260	15	141	72	275	213
1507	ENSMUSG00000055541	Lair1	chr7	-	1507	15,14,2,26,16	4,8,1,3,6	8,17,3,2,3	16,9,15,7,7	242	122	5.60557e-06	0.000275957	0.654,0.469,0.502,0.814,0.573	0.201,0.488,0.092,0.126,0.178	0.385	A5SS	chr7:4055796:4055953:4055917:4055953:4028706:4029036	73	22	33	54	95	87
3043	ENSMUSG00000026991	Pkp4	chr2	+	3043	52,24,24,40,17	6,5,2,7,1	10,19,24,12,4	12,17,10,23,1	244	122	2.86405e-07	1.75895e-05	0.813,0.706,0.857,0.741,0.895	0.294,0.358,0.545,0.207,0.667	0.388	SE	chr2:59350493:59350622:59347923:59348041:59352261:59352335	157	21	69	63	178	132
26643	ENSMUSG00000040297	Suco	chr1	-	26643	29,25,52,47,31	10,1,4,4,0	13,6,6,22,23	17,3,17,17,6	142	122	4.93448e-08	3.47111e-06	0.714,0.956,0.918,0.91,1.0	0.397,0.632,0.233,0.526,0.767	0.389	SE	chr1:161845559:161845580:161845302:161845358:161847204:161847310	184	19	70	60	203	130
41192	ENSMUSG00000021027	Ralgapa1	chr12	-	41192	38,23,38,29,35	30,16,31,31,18	2,0,0,0,0	52,38,42,32,46	244	122	0	0	0.388,0.418,0.38,0.319,0.493	0.019,0.0,0.0,0.0,0.0	0.396	SE	chr12:55735033:55735174:55722773:55722941:55738210:55738372	163	126	2	210	289	212
29715	ENSMUSG00000038365	Fbxo25	chr8	+	29715	19,13,18,7,23	20,25,17,9,18	0,0,0,0,4	30,67,51,63,37	148	122	0	0	0.439,0.3,0.466,0.391,0.513	0.0,0.0,0.0,0.0,0.082	0.405	SE	chr8:13938921:13938948:13935145:13935289:13939562:13940521	80	89	4	248	169	252
818	ENSMUSG00000025006	Sorbs1	chr19	-	818	26,17,15,12,17	25,8,11,20,8	0,17,1,0,0	26,52,34,26,19	205	122	1.33227e-15	2.12275e-13	0.382,0.558,0.448,0.263,0.558	0.0,0.163,0.017,0.0,0.0	0.406	SE	chr19:40344355:40344439:40336985:40337035:40349898:40350013	87	72	18	157	159	175
45455	ENSMUSG00000035642	Aamdc	chr7	-	45455	10,6,4,10,10	11,3,0,0,2	9,4,11,8,8	15,6,8,11,10	209	122	0.00124709	0.0255431	0.347,0.539,1.0,1.0,0.745	0.259,0.28,0.445,0.298,0.318	0.406	SE	chr7:97569686:97569774:97550547:97550741:97575587:97575691	40	16	40	50	56	90
42647	ENSMUSG00000037426	Depdc5	chr5	+	42647	57,49,47,49,50	35,28,31,28,41	5,0,5,19,11	49,42,68,41,43	187	122	0	0	0.515,0.533,0.497,0.533,0.443	0.062,0.0,0.046,0.232,0.143	0.408	SE	chr5:32959280:32959346:32955852:32955958:32964631:32964783	252	163	40	243	415	283
22467	ENSMUSG00000025747	Tyms	chr5	-	22467	26,7,15,27,5	3,1,1,3,6	13,44,30,18,20	22,38,16,42,28	243	122	1.19308e-05	0.00048899	0.813,0.778,0.883,0.819,0.295	0.229,0.368,0.485,0.177,0.264	0.413	SE	chr5:30069833:30069955:30064084:30064186:30071633:30071707	80	14	125	146	94	271
9832	ENSMUSG00000026289	Atg16l1	chr1	+	9832	121,64,78,96,111	16,6,22,16,17	54,37,63,55,59	51,65,83,57,48	178	122	0	0	0.838,0.88,0.708,0.804,0.817	0.421,0.281,0.342,0.398,0.457	0.43	SE	chr1:87774812:87774869:87774144:87774231:87775756:87775859	470	77	268	304	547	572
46930	ENSMUSG00000046873	Mbtps2	chrX	-	46930	38,40,42,64,70	4,3,2,9,9	38,15,34,19,35	13,20,16,24,30	244	122	6.53944e-12	7.52016e-10	0.826,0.87,0.913,0.78,0.795	0.594,0.273,0.515,0.284,0.368	0.43	SE	chrX:157593724:157593873:157591056:157591555:157598495:157598643	254	27	141	103	281	244
7873	ENSMUSG00000040354	Mars	chr10	-	7873	191321233342245	236236249255264	19,24,22,25,27	407861661484471	145	122	0	0	0.405,0.534,0.441,0.53,0.438	0.038,0.023,0.027,0.042,0.046	0.434	SE	chr10:127296716:127296740:127296540:127296633:127296872:127296944	1332	1240	117	2884	2572	3001
8109	ENSMUSG00000111422	1700027J07Rik	chr10	+	8109	42,34,63,59,73	0,48,50,44,0	14,37,24,27,34	57,49,76,68,75	244	122	1.5903e-06	8.16217e-05	1.0,0.262,0.387,0.401,1.0	0.109,0.274,0.136,0.166,0.185	0.436	SE	chr10:43747653:43747778:43745855:43746655:43764795:43765058	271	142	136	325	413	461
31468	ENSMUSG00000021669	Col4a3bp	chr13	+	31468	97,136,101,61,108	40,29,32,30,24	27,21,19,56,31	57,66,68,75,61	199	122	0	0	0.598,0.742,0.659,0.555,0.734	0.225,0.163,0.146,0.314,0.238	0.44	SE	chr13:96616993:96617071:96616456:96616549:96624694:96624790	503	155	154	327	658	481
2061	ENSMUSG00000070371	Prss36	chr7	-	2061	16,22,22,17,13	0,2,3,7,0	15,18,27,7,6	7,27,12,3,19	244	122	2.38299e-06	0.000116575	1.0,0.846,0.786,0.548,1.0	0.517,0.25,0.529,0.538,0.136	0.442	SE	chr7:127933566:127933832:127933370:127933492:127934389:127934627	90	12	73	68	102	141
21650	ENSMUSG00000004207	Psap	chr10	+	21650	7.95855e+16	1.08892e+16	61,36,60,59,48	2.09717e+19	130	122	0	0	0.407,0.467,0.485,0.507,0.473	0.027,0.02,0.026,0.025,0.019	0.444	SE	chr10:60297536:60297545:60295945:60296002:60299097:60299229	4764	5071	264	10380	9835	10644
39857	ENSMUSG00000062232	Rapgef2	chr3	-	39857	8,9,15,3,15	16,2,4,7,7	0,1,2,2,1	2,3,19,12,7	145	122	8.98892e-08	6.06507e-06	0.296,0.791,0.759,0.265,0.643	0.0,0.219,0.081,0.123,0.107	0.445	SE	chr3:79082623:79082647:79081061:79081285:79083198:79083322	50	36	6	43	86	49
19307	ENSMUSG00000028078	Dclk2	chr3	-	19307	18,20,45,16,26	10,6,9,15,13	2,7,9,3,2	22,17,11,27,15	169	122	6.3217e-11	6.4808e-09	0.565,0.706,0.783,0.435,0.591	0.062,0.229,0.371,0.074,0.088	0.451	SE	chr3:86830823:86830871:86824635:86824730:86831732:86831834	125	53	23	92	178	115
17340	ENSMUSG00000021962	Dcp1a	chr14	+	17340	106,38,122,62,83	6,2,8,8,7	36,22,61,14,60	41,37,28,14,28	187	122	0	0	0.92,0.925,0.909,0.835,0.886	0.364,0.279,0.587,0.395,0.583	0.453	SE	chr14:30521589:30521655:30518918:30519677:30522727:30522946	411	31	193	148	442	341
12961	ENSMUSG00000097487	Ptges3l	chr11	-	12961	8,13,4,9,15	3,0,0,2,3	11,39,5,3,21	8,13,18,8,25	175	122	1.00046e-05	0.000416936	0.65,1.0,1.0,0.758,0.777	0.489,0.677,0.162,0.207,0.369	0.456	SE	chr11:101419674:101419728:101418811:101419186:101421864:101421954	49	8	79	72	57	151
22964	ENSMUSG00000031105	Slc25a14	chrX	+	22964	13,8,18,6,9	13,4,10,3,2	0,0,3,0,2	8,22,18,9,8	244	122	8.88178e-16	1.45011e-13	0.333,0.5,0.474,0.5,0.692	0.0,0.0,0.077,0.0,0.111	0.462	SE	chrX:48623961:48624197:48623577:48623828:48629251:48629345	54	32	5	65	86	70
15276	ENSMUSG00000071454	Dtnb	chr12	+	15276	56,27,54,34,42	10,14,19,17,7	18,36,19,11,32	51,57,56,68,63	162	122	0	0	0.808,0.592,0.682,0.601,0.819	0.21,0.322,0.204,0.109,0.277	0.476	SE	chr12:3774569:3774610:3773550:3773640:3779618:3779654	213	67	116	295	280	411
17549	ENSMUSG00000003680	Taf6l	chr19	-	17549	197172202223256	7,0,0,1,0	143229129157206	77,91,96,73,74	244	122	0	0	0.934,1.0,1.0,0.991,1.0	0.481,0.557,0.402,0.518,0.582	0.477	SE	chr19:8773504:8773692:8773027:8773106:8774334:8774467	1050	8	864	411	1058	1275
2063	ENSMUSG00000070371	Prss36	chr7	-	2063	6,9,15,5,19	0,2,3,7,0	0,5,28,2,13	7,27,12,3,19	244	122	2.58816e-05	0.000958757	1.0,0.692,0.714,0.263,1.0	0.0,0.085,0.538,0.25,0.255	0.508	SE	chr7:127934138:127934280:127933370:127933492:127934389:127934627	54	12	48	68	66	116
22647	ENSMUSG00000028382	Ptbp3	chr4	-	22647	111107143178121	60,28,38,39,62	34,23,27,32,45	107,106,94,81,175	155	122	0	0	0.593,0.75,0.748,0.782,0.606	0.2,0.146,0.184,0.237,0.168	0.509	SE	chr4:59546148:59546182:59524394:59524476:59549147:59549252	660	227	161	563	887	724
15515	ENSMUSG00000023008	Fmnl3	chr15	-	15515	7,6,3,24,32	11,9,3,3,3	0,3,2,0,0	23,30,74,41,50	204	122	0	0	0.276,0.285,0.374,0.827,0.864	0.0,0.056,0.016,0.0,0.0	0.511	SE	chr15:99329093:99329176:99327843:99328166:99329279:99329432	72	29	5	218	101	223
46561	ENSMUSG00000034908	Sidt2	chr9	-	46561	120,78,86,84,120	39,55,49,36,31	10,16,18,9,24	101,87,99,70,56	133	122	0	0	0.738,0.565,0.617,0.682,0.78	0.083,0.144,0.143,0.105,0.282	0.525	SE	chr9:45947540:45947552:45946983:45947055:45947835:45947888	488	210	77	413	698	490
29654	ENSMUSG00000021814	Anxa7	chr14	-	29654	252266195254269	140120127120153	3,8,27,6,4	264301335366344	187	122	0	0	0.54,0.591,0.5,0.58,0.534	0.007,0.017,0.05,0.011,0.008	0.53	SE	chr14:20467457:20467523:20464843:20464946:20467870:20467935	1236	660	48	1610	1896	1658
60	ENSMUSG00000002546	Golga2	chr2	+	60	64,29,48,56,66	12,1,5,9,5	8,12,12,30,25	27,22,21,14,26	202	122	1.33227e-15	2.12275e-13	0.763,0.946,0.853,0.79,0.889	0.152,0.248,0.257,0.564,0.367	0.531	SE	chr2:32293314:32293395:32292092:32292215:32296625:32296721	263	32	87	110	295	197
26764	ENSMUSG00000022139	Mbnl2	chr14	+	26764	26,34,18,27,20	12,3,15,12,11	2,1,7,3,5	35,58,42,42,37	157	122	0	0	0.627,0.898,0.483,0.636,0.586	0.043,0.013,0.115,0.053,0.095	0.582	SE	chr14:120403335:120403371:120396450:120396604:120404637:120404666	125	53	18	214	178	232
14215	ENSMUSG00000066406	Akap13	chr7	+	14215	41,14,32,21,19	9,10,21,7,3	1,0,1,0,12	38,34,28,15,31	187	122	0	0	0.748,0.477,0.499,0.662,0.805	0.017,0.0,0.023,0.0,0.202	0.59	SE	chr7:75683393:75683459:75677105:75677479:75685116:75685309	127	50	14	146	177	160
3055	ENSMUSG00000040663	Clcf1	chr19	+	3055	64,59,71,85,82	15,11,4,24,16	11,10,16,12,12	22,46,37,44,45	244	122	0	0	0.681,0.728,0.899,0.639,0.719	0.2,0.098,0.178,0.12,0.118	0.59	RI	chr19:4220177:4223490:4220177:4220344:4222073:4223490	361	70	61	194	431	255
2993	ENSMUSG00000032688	Malt1	chr18	+	2993	27,13,11,24,24	18,5,5,3,8	0,0,0,1,4	40,17,57,32,77	200	122	0	0	0.478,0.613,0.573,0.83,0.647	0.0,0.0,0.0,0.019,0.031	0.618	SE	chr18:65456756:65456835:65453674:65453704:65458168:65458372	99	39	5	223	138	228
34008	ENSMUSG00000020792	Exoc7	chr11	-	34008	224264295353227	42,36,35,45,31	46,72,95,56,63	159220219202169	214	122	0	0	0.753,0.807,0.828,0.817,0.807	0.142,0.157,0.198,0.136,0.175	0.641	SE	chr11:116297570:116297663:116295543:116295689:116300265:116300433	1363	189	332	969	1552	1301
25434	ENSMUSG00000055296	Tmem245	chr4	-	25434	28,14,28,11,36	11,4,10,6,10	1,2,6,0,3	27,23,50,14,27	145	122	0	0	0.682,0.747,0.702,0.607,0.752	0.03,0.068,0.092,0.0,0.085	0.643	SE	chr4:56922386:56922410:56916701:56916806:56923338:56923508	117	41	12	141	158	153
26081	ENSMUSG00000026155	Smap1	chr1	-	26081	139162132132104	35,66,40,47,22	0,0,2,6,6	72,133,85,63,90	202	122	0	0	0.706,0.597,0.666,0.629,0.741	0.0,0.0,0.014,0.054,0.039	0.646	SE	chr1:23871437:23871518:23866216:23866297:23876373:23876449	669	210	14	443	879	457
3706	ENSMUSG00000035392	Dennd1a	chr2	-	3706	82,61,82,51,94	48,5,16,14,15	1,2,4,2,2	51,62,55,41,56	244	122	0	0	0.461,0.859,0.719,0.646,0.758	0.01,0.016,0.035,0.024,0.018	0.668	SE	chr2:37805071:37805200:37802014:37802273:37816915:37817004	370	98	11	265	468	276
12469	ENSMUSG00000037685	Atp8a1	chr5	-	12469	86,38,78,73,74	31,6,19,15,15	0,0,1,3,2	44,45,54,14,52	166	122	0	0	0.671,0.823,0.751,0.782,0.784	0.0,0.0,0.013,0.136,0.027	0.727	SE	chr5:67756649:67756694:67751012:67751085:67761113:67761202	349	86	6	209	435	215
35148	ENSMUSG00000010453	Kansl3	chr1	-	35148	151125218196206	22,3,1,0,7	28,37,33,43,34	80,65,103,77,91	199	122	0	0	0.808,0.962,0.993,1.0,0.947	0.177,0.259,0.164,0.255,0.186	0.734	SE	chr1:36347216:36347294:36345837:36346029:36348524:36348681	896	33	175	416	929	591
3023	ENSMUSG00000028464	Tpm2	chr4	-	3023	20,36,13,17,26	3,9,2,0,8	0,3,1,0,2	13,28,32,14,12	244	122	0	0	0.769,0.667,0.765,1.0,0.619	0.0,0.051,0.015,0.0,0.077	0.735	A3SS	chr4:43514710:43516003:43514710:43514861:43518229:43518299	112	22	6	99	134	105
26298	ENSMUSG00000032366	Tpm1	chr9	-	26298	46,57,69,87,37	13,6,3,13,6	4,12,36,6,14	149174157209166	197	122	0	0	0.687,0.855,0.934,0.806,0.792	0.016,0.041,0.124,0.017,0.05	0.765	SE	chr9:67031950:67032026:67031451:67031514:67032465:67032541	296	41	72	855	337	927
22965	ENSMUSG00000031105	Slc25a14	chrX	+	22965	14,12,25,16,9	9,0,2,1,0	0,1,1,1,0	6,7,3,13,4	244	122	0	0	0.438,1.0,0.862,0.889,1.0	0.0,0.067,0.143,0.037,0.0	0.788	SE	chrX:48623961:48624206:48623577:48623828:48625595:48625640	76	12	3	33	88	36
16532	ENSMUSG00000023021	Cers5	chr15	-	16532	9.02106e+15	158,80,84,61,56	38,90,48,83,66	802861758758683	228	122	0	0	0.753,0.876,0.859,0.896,0.896	0.025,0.053,0.033,0.055,0.049	0.813	SE	chr15:99737546:99737653:99734880:99736436:99738664:99738730	4789	439	325	3862	5228	4187
46900	ENSMUSG00000028134	Ptbp2	chr3	-	46900	1.33016e+19	12,17,11,9,2	5,7,9,6,30	36,47,39,50,53	155	122	0	0	0.989,0.986,0.99,0.993,0.998	0.099,0.105,0.154,0.086,0.308	0.841	SE	chr3:119724611:119724645:119724093:119724186:119726065:119726205	7226	51	57	225	7277	282
42305	ENSMUSG00000097589	Dleu2	chr14	-	42305	39,38,27,47,49	0,0,0,1,0	8,0,2,4,4	39,26,18,35,29	244	122	0	0	1.0,1.0,1.0,0.959,1.0	0.093,0.0,0.053,0.054,0.065	0.939	SE	chr14:61625219:61625362:61624432:61624482:61632436:61632483	200	1	18	147	201	165
43039	ENSMUSG00000021493	Pdlim7	chr13	-	43039	29,34,36,38,45	99,88,115,130,107	14,32,20,7,17	0,4,0,0,0	240	122	0	0	0.13,0.164,0.137,0.129,0.176	1.0,0.803,1.0,1.0,1.0	-0.813	SE	chr13:55508207:55508326:55507863:55507880:55508779:55508810	182	539	90	4	721	94
43037	ENSMUSG00000021493	Pdlim7	chr13	-	43037	107104141148122	33,47,36,67,50	0,4,0,0,0	12,9,3,2,2	138	122	1.63203e-14	2.44336e-12	0.741,0.662,0.776,0.661,0.683	0.0,0.282,0.0,0.0,0.0	0.648	SE	chr13:55507863:55507880:55507487:55507624:55508779:55508810	622	233	4	28	855	32
16274	ENSMUSG00000042323	Pbrm1	chr14	+	16274	209145140196193	14,0,2,0,14	53,35,28,31,40	41,56,29,38,24	225	122	0	0	0.89,1.0,0.974,1.0,0.882	0.412,0.253,0.344,0.307,0.475	0.591	SE	chr14:31023066:31023170:31019148:31019293:31025497:31025650	883	30	187	188	913	375
16279	ENSMUSG00000042323	Pbrm1	chr14	+	16279	314237280267302	54,19,22,35,41	31,37,33,42,30	45,49,68,67,44	234	122	0	0	0.752,0.867,0.869,0.799,0.793	0.264,0.282,0.202,0.246,0.262	0.565	SE	chr14:31023066:31023179:31022719:31022859:31025500:31025650	1400	171	173	273	1571	446
41413	ENSMUSG00000084925	1810062O18Rik	chr14	+	41413	2,0,6,1,2	5,1,1,5,4	11,30,13,16,6	3,5,1,0,2	244	122	5.8753e-06	0.000258136	0.167,0.0,0.75,0.091,0.2	0.647,0.75,0.867,1.0,0.6	-0.531	SE	chr14:20569869:20570022:20564780:20564839:20570341:20570680	11	16	76	11	27	87
4939	ENSMUSG00000026305	Lrrfip1	chr1	+	4939	222184194252228	22,30,23,46,36	5,11,13,10,19	14,25,6,22,32	199	122	0	0	0.861,0.79,0.838,0.771,0.795	0.18,0.212,0.571,0.218,0.267	0.521	SE	chr1:91093559:91093637:91084945:91085005:91100576:91100581	1080	157	58	99	1237	157
13686	ENSMUSG00000028559	Osbpl9	chr4	-	13686	99,72,88,89,100	46,16,74,73,64	12,0,8,1,5	112115129131120	190	122	0	0	0.58,0.743,0.433,0.439,0.501	0.064,0.0,0.038,0.005,0.026	0.513	SE	chr4:109107880:109107949:109102496:109102592:109133743:109133820	448	273	26	607	721	633
41028	ENSMUSG00000006498	Ptbp1	chr10	+	41028	226188177179162	145,7,7,0,17	1.16017e+19	1.30615e+19	199	122	0	0	0.489,0.943,0.939,1.0,0.854	0.353,0.405,0.423,0.36,0.396	0.458	SE	chr10:79860116:79860194:79859780:79859955:79860823:79860969	932	176	7165	6903	1108	14068
41951	ENSMUSG00000000085	Scmh1	chr4	+	41951	43,63,61,63,61	19,7,17,22,15	25,10,5,9,9	17,44,19,14,22	244	122	1.81022e-12	2.24433e-10	0.531,0.818,0.642,0.589,0.67	0.424,0.102,0.116,0.243,0.17	0.439	SE	chr4:120456284:120456509:120453751:120453775:120468234:120468469	291	80	58	116	371	174
44311	ENSMUSG00000036644	Tbc1d9b	chr11	+	44311	51,55,92,81,64	41,40,58,50,55	7,6,3,7,12	85,77,79,70,72	172	122	0	0	0.469,0.494,0.529,0.535,0.452	0.055,0.052,0.026,0.066,0.106	0.435	SE	chr11:50164161:50164212:50163824:50163896:50168168:50168225	343	244	35	383	587	418
13678	ENSMUSG00000028559	Osbpl9	chr4	-	13678	16,12,13,11,31	22,12,14,15,21	87,92,59,50,83	9,7,1,13,23	160	122	6.10623e-15	9.31763e-13	0.357,0.433,0.415,0.359,0.53	0.881,0.909,0.978,0.746,0.733	-0.431	SE	chr4:109091660:109091699:109073036:109073149:109098502:109098553	83	84	371	53	167	424
40730	ENSMUSG00000032479	Map4	chr9	+	40730	57,26,72,50,48	21,31,12,13,19	83,65,81,75,114	0,2,3,2,0	235	122	0	0	0.585,0.303,0.757,0.666,0.567	1.0,0.944,0.933,0.951,1.0	-0.39	SE	chr9:110071025:110071139:110068692:110068985:110072612:110072705	253	96	418	7	349	425
14214	ENSMUSG00000066406	Akap13	chr7	+	14214	8,9,24,12,13	9,10,21,7,3	8,1,3,5,9	38,34,28,15,31	175	122	1.00244e-09	8.95735e-08	0.383,0.386,0.443,0.544,0.751	0.128,0.02,0.07,0.189,0.168	0.386	SE	chr7:75679819:75679873:75677105:75677479:75685116:75685309	66	50	26	146	116	172
45929	ENSMUSG00000034334	Fam151b	chr13	-	45929	17,6,18,6,6	8,11,7,12,0	12,18,23,21,28	0,0,10,0,4	244	122	0.000782793	0.0173017	0.515,0.214,0.563,0.2,1.0	1.0,1.0,0.535,1.0,0.778	-0.364	SE	chr13:92473962:92474128:92449832:92450252:92477827:92477953	53	38	102	14	91	116
47073	ENSMUSG00000038608	Dock10	chr1	-	47073	47,16,17,14,6	24,14,13,10,10	1,0,1,0,3	13,13,7,13,7	197	122	9.04832e-14	1.25519e-11	0.548,0.414,0.447,0.464,0.271	0.045,0.0,0.081,0.0,0.21	0.362	SE	chr1:80503918:80503994:80501187:80501826:80505125:80505198	100	71	5	53	171	58
27562	ENSMUSG00000019188	H13	chr2	+	27562	704792769777704	644698440630464	148165161160135	1.26317e+19	244	122	0	0	0.353,0.362,0.466,0.381,0.431	0.055,0.046,0.057,0.053,0.05	0.346	SE	chr2:152703994:152704194:152700182:152700268:152704621:152705036	3746	2876	769	6994	6622	7763
1653	ENSMUSG00000025747	Tyms	chr5	-	1653	112113164163130	3,1,1,3,6	68,126,87,100,72	22,38,16,42,28	244	122	0	0	0.949,0.983,0.988,0.964,0.915	0.607,0.624,0.731,0.543,0.563	0.346	A5SS	chr5:30069833:30071707:30071633:30071707:30064084:30064186	682	14	453	146	696	599
34006	ENSMUSG00000020792	Exoc7	chr11	-	34006	48,36,36,74,32	42,36,35,45,31	16,36,23,33,27	159220219202169	190	122	0	0	0.423,0.391,0.398,0.514,0.399	0.061,0.095,0.063,0.095,0.093	0.344	SE	chr11:116296729:116296798:116295681:116295689:116300265:116300433	226	189	135	969	415	1104
13546	ENSMUSG00000042213	Zfand4	chr6	+	13546	12,21,12,11,5	23,26,15,39,19	18,39,29,28,22	7,16,6,21,21	197	122	2.04839e-06	0.000102352	0.244,0.333,0.331,0.149,0.14	0.614,0.602,0.75,0.452,0.393	-0.323	SE	chr6:116284739:116284815:116273572:116273872:116305616:116305761	61	122	136	71	183	207
24508	ENSMUSG00000020882	Cacnb1	chr11	-	24508	90120117162137	6,7,8,7,11	24,29,24,25,33	10,10,7,8,17	244	122	1.53544e-13	2.10059e-11	0.882,0.896,0.88,0.92,0.862	0.545,0.592,0.632,0.61,0.493	0.314	SE	chr11:98011342:98011497:98010295:98010376:98011865:98011942	626	39	135	52	665	187
9363	ENSMUSG00000025144	Cenpx	chr11	-	9363	23,17,32,28,31	15,8,12,15,20	1,8,10,8,8	19,29,14,19,9	244	122	1.13957e-08	8.79595e-07	0.434,0.515,0.571,0.483,0.437	0.026,0.121,0.263,0.174,0.308	0.31	SE	chr11:120712439:120712712:120711702:120711756:120713692:120713732	131	70	35	90	201	125
43528	ENSMUSG00000023235	Ccl25	chr8	+	43528	24,39,14,14,29	17,13,19,7,18	87,56,90,52,41	0,18,7,12,14	244	122	1.47439e-05	0.000583316	0.414,0.6,0.269,0.5,0.446	1.0,0.609,0.865,0.684,0.594	-0.305	SE	chr8:4349771:4349894:4327756:4327850:4353882:4354000	120	74	326	51	194	377
29053	ENSMUSG00000069631	Strada	chr11	-	29053	134,106,126,97,167	51,58,38,69,70	55,77,76,65,57	101,74,101,155,115	179	122	6.15064e-14	8.74625e-12	0.642,0.555,0.693,0.489,0.619	0.271,0.415,0.339,0.222,0.253	0.3	SE	chr11:106184561:106184619:106173678:106173781:106187100:106187180	630	286	330	546	916	876
13549	ENSMUSG00000042213	Zfand4	chr6	+	13549	16,21,14,17,14	19,6,7,13,9	25,50,35,51,34	13,7,0,0,20	189	122	0.000364989	0.00918237	0.352,0.693,0.564,0.458,0.501	0.554,0.822,1.0,1.0,0.523	-0.266	SE	chr6:116285853:116285921:116273572:116273872:116287981:116288159	82	54	195	40	136	235
3125	ENSMUSG00000021185	Dglucy	chr12	+	3125	29,31,32,45,48	0,0,0,0,3	8,13,18,6,8	0,0,4,3,8	230	122	1.67311e-06	8.53201e-05	1.0,1.0,1.0,1.0,0.895	1.0,1.0,0.705,0.515,0.347	0.266	SE	chr12:100786137:100786246:100779077:100779310:100787615:100787672	185	3	53	15	188	68
26059	ENSMUSG00000057469	E2f6	chr12	+	26059	56,115,86,118,83	46,36,53,29,64	4,50,32,43,30	53,41,75,32,53	244	122	8.80436e-06	0.00037279	0.378,0.615,0.448,0.67,0.393	0.036,0.379,0.176,0.402,0.221	0.258	SE	chr12:16812248:16812372:16811163:16811315:16813846:16813912	458	228	159	254	686	413
38178	ENSMUSG00000038215	Cep44	chr8	-	38178	9,9,21,16,18	31,28,7,19,8	4,15,2,8,4	45,25,45,41,34	244	122	1.41634e-05	0.000564177	0.127,0.138,0.6,0.296,0.529	0.043,0.231,0.022,0.089,0.056	0.25	SE	chr8:56549224:56549384:56547387:56547524:56550062:56550121	73	93	33	190	166	223
10107	ENSMUSG00000052384	Nrros	chr16	-	10107	28,47,37,53,53	4,4,3,2,7	11,22,13,13,28	5,4,5,6,7	244	122	0.000273222	0.00719776	0.778,0.855,0.86,0.93,0.791	0.524,0.733,0.565,0.52,0.667	0.241	SE	chr16:32163252:32163397:32147552:32147673:32165331:32165482	218	20	87	27	238	114
34154	ENSMUSG00000057531	Dtnbp1	chr13	-	34154	31,33,19,23,27	3,5,7,7,5	14,36,23,16,18	0,4,0,1,0	244	122	3.85405e-06	0.000180526	0.838,0.767,0.576,0.622,0.73	1.0,0.818,1.0,0.889,1.0	-0.235	SE	chr13:44999519:44999714:44970045:44970178:45001916:45002052	133	27	107	5	160	112
32682	ENSMUSG00000024426	Atat1	chr17	-	32682	13,6,5,14,9	46,26,27,40,36	46,14,28,9,11	10,31,25,27,15	204	122	0.000450986	0.0109034	0.145,0.121,0.1,0.173,0.13	0.733,0.213,0.401,0.166,0.305	-0.23	SE	chr17:35902355:35902438:35901982:35902054:35904289:35904335	47	175	108	108	222	216
15619	ENSMUSG00000021000	Mia2	chr12	+	15619	257257262283230	225223193217191	375492558471409	113177166145145	193	122	0	0	0.419,0.421,0.462,0.452,0.432	0.677,0.637,0.68,0.672,0.641	-0.224	SE	chr12:59144698:59144770:59137697:59137786:59146846:59146957	1289	1049	2305	746	2338	3051
21687	ENSMUSG00000025871	4833439L19Rik	chr13	-	21687	154142135160205	50,55,66,69,80	141234217194222	22,37,32,33,22	233	122	2.22045e-16	3.78086e-14	0.617,0.575,0.517,0.548,0.573	0.77,0.768,0.78,0.755,0.841	-0.217	SE	chr13:54564509:54564621:54561707:54561871:54565181:54565325	796	320	1008	146	1116	1154
31423	ENSMUSG00000021286	Zfyve21	chr12	+	31423	37,36,23,41,34	138,96,63,93,49	5,1,12,1,4	114157168141170	178	122	0	0	0.155,0.204,0.2,0.232,0.322	0.029,0.004,0.047,0.005,0.016	0.202	SE	chr12:111825575:111825632:111825016:111825108:111827542:111827685	171	439	23	750	610	773
21691	ENSMUSG00000025871	4833439L19Rik	chr13	-	21691	181163171188230	50,55,66,69,80	156277259223247	22,37,32,33,22	228	122	3.33067e-16	5.59919e-14	0.66,0.613,0.581,0.593,0.606	0.791,0.8,0.812,0.783,0.857	-0.198	SE	chr13:54564514:54564621:54561692:54561871:54565181:54565303	933	320	1162	146	1253	1308
47663	ENSMUSG00000034681	Rnps1	chr17	+	47663	1.05611e+18	198191197241250	482845704628564	208341368305276	244	122	0	0	0.727,0.742,0.73,0.706,0.653	0.537,0.553,0.489,0.507,0.505	0.193	SE	chr17:24418037:24418218:24414674:24414734:24418456:24418612	5321	1077	3223	1498	6398	4721
8562	ENSMUSG00000084866	A930006K02Rik	chr16	+	8562	36,39,28,53,47	30,14,8,21,16	18,28,35,21,28	12,25,25,19,33	203	122	0.00159357	0.031675	0.419,0.626,0.678,0.603,0.638	0.474,0.402,0.457,0.399,0.338	0.179	SE	chr16:91467743:91467825:91465024:91465636:91469671:91470128	203	89	130	114	292	244
620	ENSMUSG00000087174	5530601H04Rik	chrX	-	620	7,4,10,2,6	24,8,21,8,9	3,2,8,0,1	15,14,27,26,18	126	122	0.00136002	0.0227924	0.22,0.326,0.316,0.195,0.392	0.162,0.122,0.223,0.0,0.051	0.178	A5SS	chrX:105043124:105043304:105043129:105043304:105042658:105042817	29	70	14	100	99	114
1769	ENSMUSG00000067768	Xlr4b	chrX	+	1769	20,25,11,21,23	2,0,1,0,0	10,12,5,21,13	0,2,5,2,1	244	122	0.000238353	0.00405754	0.833,1.0,0.846,1.0,1.0	1.0,0.75,0.333,0.84,0.867	0.178	RI	chrX:73214773:73215355:73214773:73214856:73215240:73215355	100	3	61	10	103	71
11996	ENSMUSG00000039285	Azi2	chr9	+	11996	37,25,25,37,18	0,0,0,0,1	10,24,32,10,29	2,5,0,6,0	168	122	1.5419e-05	0.000606276	1.0,1.0,1.0,1.0,0.929	0.784,0.777,1.0,0.548,1.0	0.164	SE	chr9:118059619:118059666:118059056:118059175:118061449:118061517	142	1	105	13	143	118
7023	ENSMUSG00000038095	Sbno1	chr5	-	7023	167144150228173	86,41,72,69,60	103,80,118,159,99	97,68,84,59,96	226	122	0.000153056	0.0044356	0.512,0.655,0.529,0.641,0.609	0.364,0.388,0.431,0.593,0.358	0.162	SE	chr5:124413184:124413289:124410069:124410382:124414398:124414527	862	328	559	404	1190	963
3705	ENSMUSG00000001909	Trmt1	chr8	+	3705	101,122,132,106,92	6,3,8,5,3	77,57,107,41,95	6,20,9,10,11	244	122	1.24406e-05	0.00036426	0.894,0.953,0.892,0.914,0.939	0.865,0.588,0.856,0.672,0.812	0.16	RI	chr8:84690516:84690947:84690516:84690572:84690772:84690947	553	25	377	56	578	433
22499	ENSMUSG00000029635	Cdk8	chr5	+	22499	200152127166105	5,3,7,2,0	125114166146140	0,27,34,10,26	244	122	2.08933e-09	1.80593e-07	0.952,0.962,0.901,0.976,1.0	1.0,0.679,0.709,0.88,0.729	0.159	SE	chr5:146292623:146292767:146286107:146286239:146295162:146295232	750	17	691	97	767	788
2709	ENSMUSG00000034269	Setd5	chr6	+	2709	74,34,45,49,60	49,34,42,67,49	38,23,57,28,34	53,72,60,59,52	178	122	0.00113686	0.0235408	0.509,0.407,0.423,0.334,0.456	0.329,0.18,0.394,0.245,0.309	0.134	A3SS	chr6:113110316:113110525:113110373:113110525:113109884:113109990	262	241	180	296	503	476
1154	ENSMUSG00000022906	Parp9	chr16	+	1154	102,72,87,103,145	68,87,73,58,75	67,44,33,72,70	84,32,100,70,93	229	122	0.00216762	0.0326247	0.444,0.306,0.388,0.486,0.507	0.298,0.423,0.15,0.354,0.286	0.124	A5SS	chr16:35943368:35943510:35943368:35943402:35947500:35948354	509	361	286	379	870	665
4220	ENSMUSG00000032366	Tpm1	chr9	-	4220	21,15,11,23,10	177160199187141	247291279307274	17,30,56,27,33	197	197	0	0	0.106,0.086,0.052,0.11,0.066	0.936,0.907,0.833,0.919,0.893	-0.814	MXE	chr9:67031950:67032026:67032465:67032541:67031451:67031514:67032793:67032864	80	864	1398	163	944	1561
3929	ENSMUSG00000028464	Tpm2	chr4	-	3929	11,25,3,3,7	32,49,38,17,34	24,33,22,22,29	1,12,2,0,6	197	197	0	0	0.256,0.338,0.073,0.15,0.171	0.96,0.733,0.917,1.0,0.829	-0.69	MXE	chr4:43518643:43518719:43519002:43519078:43518401:43518464:43519226:43519297	49	170	130	21	219	151
6891	ENSMUSG00000021493	Pdlim7	chr13	-	6891	108,107,86,117,123	107104141148122	36,72,42,30,52	0,4,0,0,0	240	138	0	0	0.367,0.372,0.26,0.313,0.367	1.0,0.912,1.0,1.0,1.0	-0.647	MXE	chr13:55507863:55507880:55508207:55508326:55507487:55507624:55508779:55508810	541	622	232	4	1163	236
7441	ENSMUSG00000034908	Sidt2	chr9	-	7441	2,6,10,9,13	120,78,86,84,120	56,26,50,28,55	10,16,18,9,24	190	133	0	0	0.012,0.051,0.075,0.07,0.07	0.797,0.532,0.66,0.685,0.616	-0.602	MXE	chr9:45947540:45947552:45947628:45947697:45946983:45947055:45947835:45947888	40	488	215	77	528	292
786	ENSMUSG00000026305	Lrrfip1	chr1	+	786	37,31,40,69,62	163168172246221	20,32,13,38,50	5,10,12,10,8	181	199	0	0	0.2,0.169,0.204,0.236,0.236	0.815,0.779,0.544,0.807,0.873	-0.555	MXE	chr1:91084945:91085005:91093559:91093637:91068562:91068649:91100576:91100581	239	970	153	45	1209	198
2304	ENSMUSG00000066406	Akap13	chr7	+	2304	8,9,24,12,13	41,14,32,21,19	8,1,3,5,9	1,0,1,0,12	175	187	0.000143696	0.00549545	0.173,0.407,0.445,0.379,0.422	0.895,1.0,0.762,1.0,0.445	-0.455	MXE	chr7:75679819:75679873:75683393:75683459:75677105:75677479:75685116:75685309	66	127	26	14	193	40
1238	ENSMUSG00000075415	Fnbp1	chr2	-	1238	15,11,12,6,9	8,1,6,8,7	10,1,6,13,8	0,0,0,1,1	217	136	1.8694e-09	2.6034e-07	0.54,0.873,0.556,0.32,0.446	1.0,1.0,1.0,0.891,0.834	-0.398	MXE	chr2:31044881:31044896:31052984:31053080:31040404:31040514:31054023:31054218	53	30	38	2	83	40
1240	ENSMUSG00000075415	Fnbp1	chr2	-	1240	15,12,16,9,12	8,1,6,8,7	11,2,3,13,10	0,0,0,1,1	244	136	3.81804e-09	4.85879e-07	0.511,0.87,0.598,0.385,0.489	1.0,1.0,1.0,0.879,0.848	-0.375	MXE	chr2:31044881:31044896:31052984:31053167:31040404:31040514:31054023:31054218	64	30	39	2	94	41
7481	ENSMUSG00000028134	Ptbp2	chr3	-	7481	739853910942850	242263264312247	76,88,71,83,93	0,0,2,0,5	244	155	0	0	0.66,0.673,0.686,0.657,0.686	1.0,1.0,0.958,1.0,0.922	-0.304	MXE	chr3:119724611:119724645:119726065:119726205:119724093:119724186:119740314:119740510	4294	1328	411	7	5622	418
6556	ENSMUSG00000027506	Tpd52	chr3	-	6556	122158135176122	93,126,86,113,68	62,68,30,34,66	0,8,12,1,2	148	163	0	0	0.591,0.58,0.634,0.632,0.664	1.0,0.903,0.734,0.974,0.973	-0.297	MXE	chr3:8936438:8936480:8943550:8943577:8934991:8935040:8944610:8944712	713	486	260	23	1199	283
1017	ENSMUSG00000014353	Tmem87b	chr2	+	1017	15,22,5,24,6	59,68,35,49,39	30,7,40,30,25	32,16,33,39,18	193	193	8.90638e-07	6.50871e-05	0.203,0.244,0.125,0.329,0.133	0.484,0.304,0.548,0.435,0.581	-0.264	MXE	chr2:128839147:128839219:128840731:128840803:128837301:128837395:128841234:128841343	72	250	132	138	322	270
7482	ENSMUSG00000028134	Ptbp2	chr3	-	7482	1.21211e+18	242263264314246	58,38,56,60,76	0,0,2,0,5	244	155	0	0	0.761,0.733,0.714,0.71,0.714	1.0,1.0,0.947,1.0,0.906	-0.244	MXE	chr3:119724611:119724645:119740314:119740510:119724093:119724186:119747591:119747702	5563	1329	288	7	6892	295
1373	ENSMUSG00000033808	Tmem87a	chr2	-	1373	0,1,2,2,0	12,24,19,16,18	6,1,4,5,3	4,10,12,7,27	193	190	8.8964e-06	0.000459191	0.0,0.039,0.094,0.11,0.0	0.596,0.09,0.247,0.413,0.099	-0.24	MXE	chr2:120373910:120373979:120374487:120374559:120371523:120371632:120375418:120375512	5	89	19	60	94	79
3453	ENSMUSG00000020721	Helz	chr11	+	3453	3,0,2,6,0	31,9,10,31,33	2,6,8,7,3	21,11,9,10,23	178	244	0.00120206	0.0314623	0.117,0.0,0.215,0.21,0.0	0.115,0.428,0.549,0.49,0.152	-0.238	MXE	chr11:107555518:107555575:107574937:107575165:107549345:107549401:107592705:107592830	11	114	26	74	125	100
2220	ENSMUSG00000028559	Osbpl9	chr4	-	2220	16,12,13,11,31	268300279295246	87,92,59,50,83	244178238228242	160	212	0	0	0.073,0.05,0.058,0.047,0.143	0.321,0.406,0.247,0.225,0.312	-0.228	MXE	chr4:109087394:109087485:109091660:109091699:109073036:109073149:109098502:109098553	83	1388	371	1130	1471	1501
6779	ENSMUSG00000097589	Dleu2	chr14	-	6779	29,25,20,22,35	11,10,4,15,7	107,77,57,104,80	0,0,0,0,0	168	244	0	0	0.793,0.784,0.879,0.681,0.879	1.0,1.0,1.0,1.0,1.0	-0.197	MXE	chr14:61625219:61625362:61632436:61632483:61624432:61624482:61635524:61635591	131	47	425	0	178	425
3171	ENSMUSG00000019088	Dnase1l1	chrX	-	3171	33,9,20,38,11	5,7,10,23,7	27,49,26,44,46	10,8,1,4,11	210	222	0.00124776	0.0322018	0.875,0.576,0.679,0.636,0.624	0.741,0.866,0.965,0.921,0.816	-0.184	MXE	chrX:74274367:74274468:74276645:74276734:74273216:74273691:74277038:74277342	111	52	192	34	163	226
6356	ENSMUSG00000030263	Lrmp	chr6	+	6356	1.15792e+18	1.42114e+19	2.02522e+19	1.24117e+19	203	168	0	0	0.403,0.354,0.381,0.363,0.389	0.575,0.527,0.556,0.544,0.558	-0.174	MXE	chr6:145138181:145138263:145147635:145147682:145137459:145137607:145147779:145147844	5364	7283	10904	7351	12647	18255
1232	ENSMUSG00000033287	Kctd17	chr15	+	1232	5,10,17,15,12	2,8,1,0,0	8,11,16,13,32	0,0,0,0,1	215	196	0.000572578	0.0169048	0.695,0.533,0.939,1.0,1.0	1.0,1.0,1.0,1.0,0.967	-0.16	MXE	chr15:78436900:78436994:78437157:78437232:78435584:78435710:78437583:78437671	59	11	80	1	70	81
4840	ENSMUSG00000085936	2610307P16Rik	chr13	-	4840	17,16,26,38,17	73,108,66,108,115	37,46,62,49,49	122,83,86,97,80	213	244	2.73836e-05	0.00131246	0.211,0.145,0.311,0.287,0.145	0.258,0.388,0.452,0.367,0.412	-0.156	MXE	chr13:28669781:28669994:28711116:28711208:28668369:28668704:28772618:28772666	114	470	243	468	584	711
2190	ENSMUSG00000020456	Ogdh	chr11	+	2190	335259299290246	1.13511e+19	320495443448578	8.03101e+15	212	224	0	0	0.238,0.194,0.195,0.194,0.172	0.296,0.341,0.328,0.379,0.398	-0.15	MXE	chr11:6316764:6316855:6316977:6317080:6313787:6313979:6334532:6334648	1429	6103	2284	4473	7532	6757
3133	ENSMUSG00000030720	Cln3	chr7	-	3133	8,7,10,11,9	38,36,45,52,38	21,33,21,33,21	50,44,58,63,48	218	200	3.97711e-05	0.00183469	0.162,0.151,0.169,0.163,0.179	0.278,0.408,0.249,0.325,0.286	-0.144	MXE	chr7:126582763:126582842:126582999:126583096:126581645:126581742:126583302:126583316	45	209	129	263	254	392
2541	ENSMUSG00000021000	Mia2	chr12	+	2541	128130143149109	24,38,21,22,24	121184153151158	0,0,9,0,4	189	204	0	0	0.852,0.787,0.88,0.88,0.831	1.0,1.0,0.948,1.0,0.977	-0.139	MXE	chr12:59172524:59172592:59174105:59174188:59170956:59170992:59179849:59180008	659	129	767	13	788	780
2157	ENSMUSG00000039345	Mettl22	chr16	+	2157	121143140177173	42,63,67,50,52	76,85,90,81,83	15,19,16,9,21	244	162	6.40322e-05	0.0027478	0.657,0.601,0.581,0.702,0.688	0.771,0.748,0.789,0.857,0.724	-0.132	MXE	chr16:8477966:8478329:8482126:8482167:8473830:8473966:8482255:8482400	754	274	415	80	1028	495
1524	ENSMUSG00000021245	Mlh3	chr12	-	1524	25,7,26,10,21	5,1,10,0,3	14,10,16,4,20	0,0,3,0,2	244	145	0.000897701	0.0247236	0.748,0.806,0.607,1.0,0.806	1.0,1.0,0.76,1.0,0.856	-0.13	MXE	chr12:85240959:85240983:85245762:85245922:85240797:85240876:85247611:85247723	89	19	64	5	108	69
6267	ENSMUSG00000031295	Phka2	chrX	+	6267	78,63,80,64,67	21,26,25,19,30	70,93,74,83,70	22,16,16,11,8	240	151	0.00139458	0.0353725	0.7,0.604,0.668,0.679,0.584	0.667,0.785,0.744,0.826,0.846	-0.127	MXE	chrX:160581160:160581279:160582966:160582996:160578592:160578694:160584463:160584517	352	121	390	73	473	463
4171	ENSMUSG00000049550	Clip1	chr5	-	4171	121,66,99,112,100	295152243303272	134152153136152	184199226208227	244	238	2.42627e-09	3.19792e-07	0.286,0.298,0.284,0.265,0.264	0.415,0.427,0.398,0.389,0.395	-0.125	MXE	chr5:123627293:123627410:123630224:123631169:123623212:123623270:123640493:123640554	498	1265	727	1044	1763	1771
2733	ENSMUSG00000000673	Haao	chr17	-	2733	163,83,57,76,94	118,75,93,82,101	124143142128134	75,99,96,80,79	244	190	0.000420934	0.0130398	0.518,0.463,0.323,0.419,0.42	0.563,0.529,0.535,0.555,0.569	-0.122	MXE	chr17:83832326:83832395:83834778:83834924:83831826:83831909:83835190:83835234	473	469	671	429	942	1100
4839	ENSMUSG00000085936	2610307P16Rik	chr13	-	4839	8,11,15,13,6	94,96,77,112,126	22,25,40,23,30	118,112,74,117,113	213	232	3.74643e-06	0.000221219	0.085,0.111,0.175,0.112,0.049	0.169,0.196,0.371,0.176,0.224	-0.121	MXE	chr13:28608517:28608628:28711116:28711208:28561483:28561579:28772618:28772666	53	505	140	534	558	674
3291	ENSMUSG00000053436	Mapk14	chr17	+	3291	659505553521584	277233315365325	644601785634762	169231225167225	201	201	1.07019e-11	1.83699e-09	0.704,0.684,0.637,0.588,0.642	0.792,0.722,0.777,0.792,0.772	-0.12	MXE	chr17:28737010:28737090:28740679:28740759:28728903:28728975:28741787:28741866	2822	1515	3426	1017	4337	4443
5295	ENSMUSG00000007035	Msh5	chr17	-	5295	35,43,34,47,36	73117100133133	37,47,43,51,59	78,87,79,77,68	202	243	0.00021229	0.00760637	0.366,0.307,0.29,0.298,0.246	0.363,0.394,0.396,0.443,0.511	-0.12	MXE	chr17:35044316:35044438:35045293:35045374:35043965:35044134:35045929:35046116	195	556	237	389	751	626
3516	ENSMUSG00000049411	Tmem241	chr18	-	3516	12,16,23,16,15	0,5,3,0,9	12,20,24,30,22	0,1,0,1,0	147	173	1.97093e-06	0.0001265	1.0,0.79,0.9,1.0,0.662	1.0,0.959,1.0,0.972,1.0	-0.116	MXE	chr18:12070079:12070131:12074617:12074643:12066183:12067105:12083991:12084069	82	17	108	2	99	110
579	ENSMUSG00000021639	Gtf2h2	chr13	-	579	124135130134100	195240207211214	144194190152152	139178196200185	161	233	1.17435e-06	8.17723e-05	0.479,0.449,0.476,0.479,0.403	0.6,0.612,0.584,0.524,0.543	-0.115	MXE	chr13:100468914:100469026:100470878:100470918:100460249:100460420:100476469:100476572	623	1067	832	898	1690	1730
1982	ENSMUSG00000028175	Depdc1a	chr3	+	1982	171131103190127	510542527591465	263181181220221	500344395483503	244	244	2.1014e-11	3.44676e-09	0.251,0.195,0.163,0.243,0.215	0.345,0.345,0.314,0.313,0.305	-0.111	MXE	chr3:159522525:159523356:159523776:159523949:159520829:159520970:159526530:159526707	722	2635	1066	2225	3357	3291
7324	ENSMUSG00000027326	Knl1	chr2	+	7324	138,110,94,179,139	130,70,99,92,84	170134161130127	61,33,75,76,63	174	244	0.000190865	0.00693977	0.598,0.688,0.571,0.732,0.699	0.796,0.851,0.751,0.706,0.739	-0.111	MXE	chr2:119065948:119066001:119068122:119072619:119064044:119064097:119076231:119076370	660	475	722	308	1135	1030
6163	ENSMUSG00000003269	Cyth2	chr7	-	6163	48,43,39,53,39	234243218308287	87,132,107,74,81	253411308251283	198	244	1.06413e-08	1.24672e-06	0.202,0.179,0.181,0.175,0.143	0.298,0.284,0.3,0.266,0.261	-0.106	MXE	chr7:45807932:45808087:45808372:45808449:45806636:45807848:45810126:45810238	222	1290	481	1506	1512	1987
7457	ENSMUSG00000038671	Arfrp1	chr2	-	7457	209224197208220	85,49,82,59,70	179191258220244	28,48,49,22,31	204	203	6.3945e-08	6.16822e-06	0.71,0.82,0.705,0.778,0.758	0.864,0.798,0.84,0.909,0.887	-0.105	MXE	chr2:181361390:181361472:181364013:181364096:181359638:181359739:181364310:181364398	1058	345	1092	178	1403	1270
4616	ENSMUSG00000061533	Cep128	chr12	-	4616	33,37,40,41,55	15,3,5,4,7	34,26,41,35,31	0,3,0,3,0	244	244	2.24543e-06	0.000139703	0.688,0.925,0.889,0.911,0.887	1.0,0.897,1.0,0.921,1.0	-0.104	MXE	chr12:91370061:91370196:91381647:91381788:91348749:91348876:91384233:91384359	206	34	167	6	240	173
5033	ENSMUSG00000028708	Mknk1	chr4	+	5033	99,97,94,88,94	14,21,17,16,14	85141133123111	4,9,4,8,7	244	227	1.81726e-08	2.03231e-06	0.868,0.811,0.837,0.837,0.862	0.952,0.936,0.969,0.935,0.937	-0.103	MXE	chr4:115848219:115848362:115854901:115855007:115839197:115839281:115857031:115857133	472	82	593	32	554	625
5677	ENSMUSG00000026594	Ralgps2	chr1	-	5677	88,50,49,77,64	27,14,9,28,21	79,68,94,68,73	5,8,11,7,12	172	226	4.43786e-07	3.59955e-05	0.811,0.824,0.877,0.783,0.8	0.954,0.918,0.918,0.927,0.889	-0.102	MXE	chr1:156892907:156893012:156900585:156900636:156887946:156888030:156907638:156907778	328	99	382	43	427	425
6914	ENSMUSG00000028573	Fggy	chr4	+	6914	7,7,11,7,19	0,1,0,0,0	40,28,16,14,24	3,3,3,4,0	229	183	7.37678e-05	0.00309364	1.0,0.848,1.0,1.0,1.0	0.914,0.882,0.81,0.737,1.0	0.101	MXE	chr4:95800556:95800664:95812107:95812169:95769425:95769529:95820881:95821569	51	1	122	13	52	135
767	ENSMUSG00000030374	Strn4	chr7	+	767	68111115118121	370383369380431	55,66,71,46,41	341523498403402	237	244	5.66214e-14	1.30601e-11	0.159,0.23,0.243,0.242,0.224	0.142,0.115,0.128,0.105,0.095	0.103	MXE	chr7:16831464:16831580:16832925:16833101:16831024:16831138:16833177:16833225	533	1933	279	2167	2466	2446
1188	ENSMUSG00000062866	Phactr2	chr10	-	1188	2,1,7,15,13	16,20,32,32,27	0,0,1,1,1	3,18,43,9,30	244	133	2.10286e-09	2.87429e-07	0.064,0.027,0.107,0.204,0.208	0.0,0.0,0.013,0.057,0.018	0.104	MXE	chr10:13255309:13255321:13257576:13257816:13253341:13253879:13261765:13261924	38	127	3	103	165	106
6542	ENSMUSG00000025089	Gfra1	chr19	-	6542	26,19,41,44,51	115111171136139	26,22,22,23,28	154138163151197	136	244	0.000316358	0.0106052	0.289,0.235,0.301,0.367,0.397	0.232,0.222,0.195,0.215,0.203	0.104	MXE	chr19:58300241:58300578:58392572:58392587:58239253:58239307:58451968:58452052	181	672	121	803	853	924
2480	ENSMUSG00000071454	Dtnb	chr12	+	2480	18,20,30,24,11	70,61,94,54,66	5,24,14,17,5	58,103,97,84,92	209	207	0.000378019	0.0119749	0.203,0.245,0.24,0.306,0.142	0.079,0.188,0.125,0.167,0.051	0.105	MXE	chr12:3734938:3735026:3748424:3748510:3718411:3718489:3749469:3749583	103	345	65	434	448	499
178	ENSMUSG00000030956	Fam53b	chr7	-	178	180108230215251	234158374318394	125,87,116,72,116	244254288238281	244	173	5.25967e-09	6.3642e-07	0.353,0.326,0.304,0.324,0.311	0.266,0.195,0.222,0.177,0.226	0.106	MXE	chr7:132771577:132771629:132779135:132779385:132759267:132760167:132813065:132813095	984	1478	516	1305	2462	1821
6031	ENSMUSG00000042185	Nfrkb	chr9	+	6031	21,9,15,3,15	31,26,41,32,32	10,5,8,2,6	51,35,27,36,37	244	195	0.00211619	0.0492733	0.351,0.217,0.226,0.07,0.273	0.135,0.102,0.191,0.043,0.115	0.11	MXE	chr9:31396793:31397137:31397719:31397793:31396322:31396497:31398559:31398644	63	162	31	186	225	217
543	ENSMUSG00000021936	Mapk8	chr14	-	543	5,0,23,22,10	47,34,61,79,83	0,0,4,3,0	31,54,34,82,97	193	193	1.78049e-10	2.68201e-08	0.096,0.0,0.274,0.218,0.108	0.0,0.0,0.105,0.035,0.0	0.111	MXE	chr14:33390241:33390313:33390672:33390744:33388799:33388982:33392941:33393107	60	304	7	298	364	305
7134	ENSMUSG00000036644	Tbc1d9b	chr11	+	7134	12,26,13,18,11	74,83,131,105,109	4,6,0,4,5	126,110,131,90,115	172	178	3.78462e-11	5.94346e-09	0.144,0.245,0.093,0.151,0.095	0.032,0.053,0.0,0.044,0.043	0.111	MXE	chr11:50164161:50164212:50168168:50168225:50163824:50163896:50168695:50168802	80	502	19	572	582	591
4105	ENSMUSG00000025558	Dock9	chr14	-	4105	52,17,41,12,25	4,0,0,0,0	27,35,23,23,22	0,0,12,3,1	244	165	0.000370306	0.0118322	0.898,1.0,1.0,1.0,1.0	1.0,1.0,0.564,0.838,0.937	0.112	MXE	chr14:121591310:121591354:121591811:121591948:121586226:121586342:121594335:121594383	147	4	130	16	151	146
5633	ENSMUSG00000032294	Pkm	chr9	+	5633	9.67167e+18	6.67486e+19	230525543468352	7.22014e+22	244	244	0	0	0.127,0.162,0.159,0.145,0.155	0.031,0.037,0.043,0.041,0.036	0.112	MXE	chr9:59675028:59675195:59675567:59675734:59671920:59672073:59678043:59678225	6759	38241	2118	53140	45000	55258
7610	ENSMUSG00000034681	Rnps1	chr17	+	7610	100,77,83,79,80	198191196241250	31,78,91,69,50	208341368307276	243	244	7.00051e-09	8.334e-07	0.336,0.288,0.298,0.248,0.243	0.13,0.187,0.199,0.184,0.154	0.112	MXE	chr17:24415040:24415162:24418456:24418612:24414674:24414734:24421748:24421851	419	1076	319	1500	1495	1819
784	ENSMUSG00000026305	Lrrfip1	chr1	+	784	9,13,25,20,12	144121133174145	0,0,0,0,0	5,7,12,7,8	169	199	7.70169e-08	7.10577e-06	0.069,0.112,0.181,0.119,0.089	0.0,0.0,0.0,0.0,0.0	0.114	MXE	chr1:91076943:91076991:91093559:91093637:91073323:91073341:91100576:91100612	79	717	0	39	796	39
788	ENSMUSG00000026305	Lrrfip1	chr1	+	788	40,37,58,73,74	481373391471464	13,2,4,6,2	458545513591566	214	244	0	0	0.087,0.102,0.145,0.15,0.154	0.031,0.004,0.009,0.011,0.004	0.116	MXE	chr1:91108579:91108672:91112155:91112297:91107297:91107390:91122421:91122539	282	2180	27	2673	2462	2700
831	ENSMUSG00000027478	Dnmt3b	chr2	+	831	4,8,11,3,2	43,53,35,32,40	0,0,0,1,0	90116123110121	241	244	3.21854e-13	6.59889e-11	0.086,0.133,0.241,0.087,0.048	0.0,0.0,0.0,0.009,0.0	0.117	MXE	chr2:153662713:153662833:153665251:153665377:153661424:153661602:153665906:153666101	28	203	1	560	231	561
3948	ENSMUSG00000020882	Cacnb1	chr11	-	3948	57,53,57,84,71	103101153136140	16,14,11,14,18	59,73,40,60,49	244	202	8.53228e-06	0.000443498	0.314,0.303,0.236,0.338,0.296	0.183,0.137,0.185,0.162,0.233	0.117	MXE	chr11:98010295:98010376:98011342:98011497:98009857:98009916:98011865:98011942	322	633	73	281	955	354
4827	ENSMUSG00000030534	Vps33b	chr7	+	4827	118144154140132	8,5,21,4,12	111153162137125	33,37,30,17,33	189	183	3.02865e-10	4.47089e-08	0.935,0.965,0.877,0.971,0.914	0.765,0.8,0.839,0.886,0.786	0.117	MXE	chr7:80276397:80276465:80279971:80280033:80276045:80276095:80282484:80282579	688	50	688	150	738	838
252	ENSMUSG00000020978	Klhdc2	chr12	+	252	178140135160150	86,127,69,104,104	98175176147143	133161171133142	209	174	0.000150386	0.00572165	0.633,0.479,0.62,0.562,0.546	0.38,0.475,0.461,0.479,0.456	0.118	MXE	chr12:69308957:69309045:69309986:69310039:69307617:69307690:69310152:69310687	763	490	739	740	1253	1479
6732	ENSMUSG00000092203	1110038B12Rik	chr17	-	6732	89,62,85,74,83	120113142107117	52,82,80,41,50	128163155155157	162	244	0.000142853	0.00549165	0.528,0.452,0.474,0.51,0.517	0.38,0.431,0.437,0.285,0.324	0.125	MXE	chr17:34950697:34950847:34951884:34951925:34950240:34950475:34952135:34952173	393	599	305	758	992	1063
1656	ENSMUSG00000020166	Cnot2	chr10	-	1656	76,49,76,116,104	42,25,36,42,36	38,62,46,70,56	38,49,40,36,39	244	188	0.000722529	0.0204329	0.582,0.602,0.619,0.68,0.69	0.435,0.494,0.47,0.6,0.525	0.13	MXE	chr10:116517316:116517383:116527826:116527949:116501191:116501317:116537220:116537448	421	181	272	202	602	474
1189	ENSMUSG00000062866	Phactr2	chr10	-	1189	95,39,80,75,75	29,8,19,44,23	38,49,73,52,76	26,49,24,40,37	202	244	0.00199984	0.0471592	0.798,0.855,0.836,0.673,0.798	0.638,0.547,0.786,0.611,0.713	0.133	MXE	chr10:13261765:13261924:13266972:13267053:13253341:13253879:13291794:13291962	364	123	288	176	487	464
2608	ENSMUSG00000057440	Mpp7	chr18	-	2608	71,43,43,46,58	26,15,20,16,12	43,46,49,28,54	29,23,31,17,36	244	202	0.000985815	0.0265558	0.693,0.704,0.64,0.704,0.8	0.551,0.623,0.567,0.577,0.554	0.134	MXE	chr18:7379988:7380069:7403185:7403356:7356141:7356235:7439568:7439633	261	89	220	136	350	356
3160	ENSMUSG00000079845	Xlr4a	chrX	-	3160	61,41,40,52,29	79,36,45,96,48	23,74,33,40,34	60,151,84,84,105	221	220	0.00024349	0.00847736	0.435,0.531,0.469,0.35,0.376	0.276,0.328,0.281,0.322,0.244	0.142	MXE	chrX:73076732:73076831:73078024:73078124:73074834:73074930:73078975:73079093	223	304	204	484	527	688
4104	ENSMUSG00000025558	Dock9	chr14	-	4104	21,20,41,19,35	4,0,0,0,0	14,20,13,9,8	0,0,12,3,1	189	165	5.88722e-05	0.00254115	0.821,1.0,1.0,1.0,1.0	1.0,1.0,0.486,0.724,0.875	0.147	MXE	chr14:121591310:121591354:121591811:121591879:121586226:121586342:121594335:121594383	136	4	64	16	140	80
7689	ENSMUSG00000020798	Spns3	chr11	-	7689	65,69,60,90,124	13,35,23,36,45	46,71,65,91,70	52,59,36,55,54	187	244	1.4083e-05	0.000711961	0.867,0.72,0.773,0.765,0.782	0.536,0.611,0.702,0.683,0.628	0.149	MXE	chr11:72529533:72529723:72545887:72545953:72499637:72499736:72549997:72550506	408	152	343	256	560	599
5259	ENSMUSG00000024426	Atat1	chr17	-	5259	88,59,55,78,78	8,6,3,11,7	26,76,49,46,28	22,12,21,8,10	167	204	2.71697e-06	0.000164377	0.931,0.923,0.957,0.897,0.932	0.591,0.886,0.74,0.875,0.774	0.155	MXE	chr17:35902355:35902438:35904289:35904335:35901982:35902054:35908562:35908664	358	35	225	73	393	298
5298	ENSMUSG00000007035	Msh5	chr17	-	5298	15,28,16,25,22	19,34,33,25,44	10,15,8,11,12	33,38,30,27,38	202	184	0.000932827	0.0254066	0.418,0.429,0.306,0.477,0.313	0.216,0.264,0.195,0.271,0.223	0.155	MXE	chr17:35045113:35045176:35045293:35045374:35044316:35044438:35046230:35046520	106	155	56	166	261	222
1318	ENSMUSG00000087174	5530601H04Rik	chrX	-	1318	61,87,65,96,46	51,32,28,27,26	71,86,45,30,30	46,60,42,31,50	244	244	0.00110393	0.0294156	0.545,0.731,0.699,0.78,0.639	0.607,0.589,0.517,0.492,0.375	0.163	MXE	chrX:105042603:105042817:105043129:105043304:105038816:105039812:105044001:105044111	355	164	262	229	519	491
787	ENSMUSG00000026305	Lrrfip1	chr1	+	787	47,37,71,98,89	154156122196155	13,3,4,2,3	23,26,52,39,38	214	214	1.29592e-05	0.000659666	0.234,0.192,0.368,0.333,0.365	0.361,0.103,0.071,0.049,0.073	0.167	MXE	chr1:91108579:91108672:91110354:91110447:91107297:91107390:91112155:91112297	342	783	25	178	1125	203
2925	ENSMUSG00000044348	Slc25a53	chrX	-	2925	7,18,17,15,18	12,26,36,35,37	9,9,9,7,5	23,48,40,30,35	195	244	0.000355926	0.0115256	0.422,0.464,0.371,0.349,0.378	0.329,0.19,0.22,0.226,0.152	0.173	MXE	chrX:137027989:137028154:137030025:137030099:137016248:137016339:137032350:137032500	75	146	39	176	221	215
3926	ENSMUSG00000017718	Afmid	chr11	+	3926	4,7,2,4,5	16,14,4,17,25	0,3,0,0,2	8,14,8,5,14	226	207	0.000163505	0.00607233	0.186,0.314,0.314,0.177,0.155	0.0,0.164,0.0,0.0,0.116	0.173	MXE	chr11:117832344:117832449:117834766:117834852:117825923:117826006:117834945:117835018	22	76	5	49	98	54
3771	ENSMUSG00000031864	Ints10	chr8	+	3771	20,24,34,32,30	7,0,0,0,1	7,16,28,19,9	7,8,2,8,0	199	199	7.56038e-05	0.00315272	0.741,1.0,1.0,1.0,0.968	0.5,0.667,0.933,0.704,1.0	0.181	MXE	chr8:68824189:68824267:68825051:68825129:68822156:68822250:68827276:68829408	140	8	79	25	148	104
3946	ENSMUSG00000020882	Cacnb1	chr11	-	3946	57,53,57,84,71	11,9,8,7,3	16,14,11,14,18	4,5,4,6,14	244	244	3.39427e-05	0.00158564	0.838,0.855,0.877,0.923,0.959	0.8,0.737,0.733,0.7,0.563	0.184	MXE	chr11:98010003:98010376:98011342:98011497:98009857:98009916:98011865:98011942	322	38	73	33	360	106
5128	ENSMUSG00000068735	Trp53i11	chr2	+	5128	151141231200292	365363507543590	53,54,56,45,40	485631554616454	244	203	0	0	0.256,0.244,0.275,0.235,0.292	0.083,0.066,0.078,0.057,0.068	0.19	MXE	chr2:93189088:93189223:93196896:93196978:93187547:93187747:93197608:93197748	1015	2368	248	2740	3383	2988
5672	ENSMUSG00000039242	B3galnt2	chr13	+	5672	22,0,2,2,7	4,16,23,17,17	1,0,1,0,3	8,1,17,13,18	232	200	0.00113009	0.0298967	0.826,0.0,0.07,0.092,0.262	0.097,0.0,0.048,0.0,0.126	0.196	MXE	chr13:13987352:13987463:13990788:13990867:13970766:13970867:13991409:13991552	33	77	5	57	110	62
2405	ENSMUSG00000029676	Pot1a	chr6	-	2405	5,8,1,3,10	14,28,17,11,17	0,7,0,0,6	52,44,26,35,40	188	244	5.23095e-05	0.00231195	0.317,0.271,0.071,0.261,0.433	0.0,0.171,0.0,0.0,0.163	0.204	MXE	chr6:25800283:25800510:25805874:25805941:25793597:25794674:25809174:25809246	27	87	13	197	114	210
2923	ENSMUSG00000044348	Slc25a53	chrX	-	2923	7,18,17,18,18	22,17,28,25,14	10,8,9,7,5	29,28,35,23,27	195	212	0.000318974	0.0106052	0.257,0.535,0.398,0.439,0.583	0.273,0.237,0.218,0.249,0.168	0.213	MXE	chrX:137016248:137016339:137030025:137030099:137015256:137015382:137032350:137032500	78	106	39	142	184	181
5048	ENSMUSG00000026319	2310035C23Rik	chr1	+	5048	90,56,108,104,96	6,28,16,10,14	29,33,63,42,86	33,16,29,27,43	204	204	2.30304e-08	2.49981e-06	0.938,0.667,0.871,0.912,0.873	0.468,0.673,0.685,0.609,0.667	0.232	MXE	chr1:105740434:105740517:105741012:105741095:105735922:105736022:105741296:105741360	454	74	253	148	528	401
4	ENSMUSG00000002546	Golga2	chr2	+	4	28,8,29,28,25	77,20,54,54,26	5,4,7,9,5	48,48,66,42,69	202	217	3.43614e-11	5.51351e-09	0.281,0.301,0.366,0.358,0.508	0.101,0.082,0.102,0.187,0.072	0.254	MXE	chr2:32293314:32293395:32296625:32296721:32292092:32292215:32296964:32297008	118	231	30	273	349	303
2398	ENSMUSG00000032966	Fkbp1a	chr2	+	2398	51,66,30,42,60	4,5,3,5,7	27,22,33,26,6	7,8,8,6,25	244	212	0.000125062	0.00496283	0.917,0.92,0.897,0.879,0.882	0.77,0.705,0.782,0.79,0.173	0.255	MXE	chr2:151544012:151544140:151545424:151545515:151542817:151542865:151557385:151557498	249	24	114	54	273	168
2225	ENSMUSG00000070372	Capza1	chr3	-	2225	1.54516e+19	1.31412e+19	6,129,392,10,7	7.25894e+15	193	184	0	0	0.529,0.561,0.554,0.545,0.569	0.008,0.121,0.262,0.012,0.007	0.47	MXE	chr3:104825406:104825469:104828526:104828598:104822778:104825124:104834097:104834176	7377	5731	544	4480	13108	5024
6778	ENSMUSG00000097589	Dleu2	chr14	-	6778	30,28,23,35,43	0,0,0,0,0	8,0,2,4,4	22,11,13,19,14	244	171	0	0	1.0,1.0,1.0,1.0,1.0	0.203,0.0,0.097,0.129,0.167	0.881	MXE	chr14:61624432:61624482:61625219:61625362:61619472:61620018:61632436:61632483	159	0	18	79	159	97
3718	ENSMUSG00000031105	Slc25a14	chrX	+	3718	11,6,14,4,6	5,6,9,7,21	0,0,1,0,0	2,5,17,11,3	244	169	1.67e-12	3.08156e-10	0.604,0.409,0.519,0.284,0.165	0.0,0.0,0.039,0.0,0.0	0.388	MXE	chrX:48623961:48624206:48628135:48628183:48623577:48623828:48629251:48629345	41	48	1	38	89	39
5258	ENSMUSG00000024426	Atat1	chr17	-	5258	26,30,32,42,28	8,6,3,11,7	20,15,13,16,7	22,12,21,8,10	190	204	6.4348e-08	6.16822e-06	0.777,0.843,0.92,0.804,0.811	0.494,0.573,0.399,0.682,0.429	0.316	MXE	chr17:35902355:35902438:35904107:35904176:35901982:35902054:35908562:35908664	158	35	71	73	193	144
2938	ENSMUSG00000058835	Abi1	chr2	-	2938	304311349305365	201233239256256	346275370352385	121110135105156	244	244	1.44329e-15	3.67342e-13	0.602,0.572,0.594,0.544,0.588	0.741,0.714,0.733,0.77,0.712	-0.154	MXE	chr2:22971082:22971259:22994522:22994690:22963213:22963228:23039948:23040104	1634	1185	1728	627	2819	2355
1215	ENSMUSG00000052752	Traf7	chr17	-	1215	28,24,26,42,31	301237347322312	50,46,68,65,75	183288258264226	213	244	1.87184e-13	3.94743e-11	0.096,0.104,0.079,0.13,0.102	0.238,0.155,0.232,0.22,0.275	-0.122	MXE	chr17:24514712:24514866:24516504:24516596:24514124:24514217:24519130:24519246	151	1519	304	1219	1670	1523
6241	ENSMUSG00000000884	Gnb1l	chr16	+	6241	8,11,19,11,8	95149121146110	38,25,13,35,24	74170112148100	244	244	6.25254e-06	0.000349621	0.078,0.069,0.136,0.07,0.068	0.339,0.128,0.104,0.191,0.194	-0.107	MXE	chr16:18540971:18541097:18544114:18544273:18499045:18499140:18548092:18548191	57	621	135	604	678	739

## Sheet: Fig4b P1P2dKO - Ctrl 
ID	GeneID	geneSymbol	chr	Strand	ID.1	IJC_SAMPLE_1	SJC_SAMPLE_1	IJC_SAMPLE_2	SJC_SAMPLE_2	IncFormLen	SkipFormLen	PValue	FDR	IncLevel1	IncLevel2	IncLevelDifference	EventType	EventID	sum.IJC_SAMPLE_1	sum.SJC_SAMPLE_1	sum.IJC_SAMPLE_2	sum.SJC_SAMPLE_2	sum.Sample_1	sum.Sample_2
46883	ENSMUSG00000028134	Ptbp2	chr3	-	46883	0,0,0,0,0	143128150147170	108,70,81,112,121	0,0,0,0,0	244	122	0	0	0.0,0.0,0.0,0.0,0.0	1.0,1.0,1.0,1.0,1.0	-1	SE	chr3:119752943:119753116:119751863:119752007:119761702:119761778	0	738	492	0	738	492
1285	ENSMUSG00000022973	Synj1	chr16	-	1285	0,0,0,0,0	30,20,10,13,13	15,12,14,12,14	1,1,0,0,6	130	122	0	0	0.0,0.0,0.0,0.0,0.0	0.934,0.918,1.0,1.0,0.686	-0.908	A3SS	chr16:90973909:90974075:90973909:90974066:90976598:90976751	0	86	67	8	86	75
11513	ENSMUSG00000078812	Eif5a	chr11	-	11513	5,0,4,8,1	28,21,38,30,27	1,8,9,4,2	0,0,0,0,3	203	122	7.03881e-14	4.19285e-12	0.097,0.0,0.059,0.138,0.022	1.0,1.0,1.0,1.0,0.286	-0.794	SE	chr11:69920340:69920422:69917916:69918021:69921162:69921190	18	144	24	3	162	27
26248	ENSMUSG00000032366	Tpm1	chr9	-	26248	4,10,2,1,0	160187102136170	98,120,131,98,108	13,21,27,21,19	197	122	0	0	0.015,0.032,0.012,0.005,0.0	0.824,0.78,0.75,0.743,0.779	-0.762	SE	chr9:67032465:67032541:67031950:67032026:67032793:67032864	17	755	555	101	772	656
3129	ENSMUSG00000052337	Immt	chr6	+	3129	445282337290348	1.22811e+19	7.81796e+15	58,60,93,57,46	223	122	0	0	0.165,0.124,0.154,0.115,0.139	0.88,0.879,0.862,0.885,0.897	-0.741	SE	chr6:71852765:71852867:71851771:71851880:71856911:71856955	1702	5737	4169	314	7439	4483
3126	ENSMUSG00000052337	Immt	chr6	+	3126	574406461368430	1.22811e+19	1.02411e+17	58,60,93,57,46	244	122	0	0	0.189,0.157,0.186,0.131,0.154	0.898,0.901,0.88,0.897,0.91	-0.734	SE	chr6:71852729:71852867:71851771:71851880:71856911:71857048	2239	5737	5408	314	7976	5722
3128	ENSMUSG00000052337	Immt	chr6	+	3128	686395465391554	1.22811e+19	1.15712e+19	58,60,93,57,46	226	122	0	0	0.232,0.164,0.199,0.147,0.202	0.915,0.914,0.894,0.921,0.929	-0.726	SE	chr6:71852762:71852867:71851771:71851880:71856911:71857048	2491	5737	6142	314	8228	6456
7747	ENSMUSG00000075415	Fnbp1	chr2	-	7747	13,7,13,14,9	29,28,48,50,56	2,1,3,2,3	0,0,0,1,1	217	122	1.28545e-09	5.34554e-08	0.201,0.123,0.132,0.136,0.083	1.0,1.0,1.0,0.529,0.628	-0.696	SE	chr2:31052984:31053080:31044881:31044896:31054023:31054218	56	211	11	2	267	13
3145	ENSMUSG00000025558	Dock9	chr14	-	3145	0,2,0,4,5	25,11,15,9,13	21,19,12,23,16	7,2,2,4,2	190	122	0	0	0.0,0.105,0.0,0.222,0.198	0.658,0.859,0.794,0.787,0.837	-0.682	A3SS	chr14:121591811:121591948:121591811:121591879:121594335:121594383	11	73	91	17	84	108
3130	ENSMUSG00000052337	Immt	chr6	+	3130	109,95,87,66,106	1.22811e+19	222266294263284	58,60,93,57,46	217	122	0	0	0.048,0.047,0.046,0.029,0.048	0.683,0.714,0.64,0.722,0.776	-0.663	SE	chr6:71853172:71853268:71851771:71851880:71856911:71857048	463	5737	1329	314	6200	1643
24287	ENSMUSG00000028464	Tpm2	chr4	-	24287	0,0,0,0,1	75,50,48,69,61	9,14,11,15,3	1,12,2,0,6	197	122	0	0	0.0,0.0,0.0,0.0,0.01	0.848,0.419,0.773,1.0,0.236	-0.653	SE	chr4:43519002:43519078:43518643:43518719:43519226:43519297	1	303	52	21	304	73
4759	ENSMUSG00000025766	D3Ertd751e	chr3	+	4759	0,3,1,0,0	9,9,12,8,9	20,13,10,16,18	2,3,2,5,8	238	122	0	0	0.0,0.146,0.041,0.0,0.0	0.837,0.69,0.719,0.621,0.536	-0.643	SE	chr3:41744695:41744812:41742610:41742689:41746547:41746728	4	47	77	20	51	97
21393	ENSMUSG00000039089	L3mbtl3	chr10	-	21393	7,6,24,14,11	20,17,31,26,24	39,43,56,17,52	2,0,4,10,1	196	122	0	0	0.179,0.18,0.325,0.251,0.222	0.924,1.0,0.897,0.514,0.97	-0.63	SE	chr10:26344176:26344251:26342507:26342667:26344611:26344723	62	118	207	17	180	224
35726	ENSMUSG00000001017	Chtop	chr3	-	35726	20,10,3,8,12	8,7,7,12,5	8,3,6,5,11	0,0,0,0,0	244	122	1.9984e-15	1.35061e-13	0.556,0.417,0.176,0.25,0.545	1.0,1.0,1.0,1.0,1.0	-0.611	SE	chr3:90506107:90507258:90498955:90500107:90507544:90507626	53	39	33	0	92	33
42186	ENSMUSG00000097589	Dleu2	chr14	-	42186	7,3,0,1,1	14,12,10,25,9	2,4,3,2,1	6,0,0,3,0	227	122	0.000368712	0.00563682	0.212,0.118,0.0,0.021,0.056	0.152,1.0,1.0,0.264,1.0	-0.602	SE	chr14:61614165:61614271:61603033:61603806:61625219:61625362	12	70	12	9	82	21
587	ENSMUSG00000005506	Celf1	chr2	+	587	145165150189233	388229335251330	264240299253187	24,32,34,16,30	244	122	0	0	0.157,0.265,0.183,0.274,0.261	0.846,0.789,0.815,0.888,0.757	-0.591	A3SS	chr2:91013490:91019490:91016565:91019490:91013237:91013402	882	1533	1243	136	2415	1379
17783	ENSMUSG00000037936	Scarb1	chr5	-	17783	685558572526519	571504398504475	8.32117e+18	46,33,24,44,34	244	122	0	0	0.375,0.356,0.418,0.343,0.353	0.9,0.947,0.962,0.931,0.942	-0.567	SE	chr5:125281104:125281233:125277086:125277865:125283898:125284045	2860	2452	5482	181	5312	5663
36798	ENSMUSG00000021843	Ktn1	chr14	+	36798	13,9,6,21,19	154146112118133	118,85,132,130,120	41,24,43,35,87	205	122	0	0	0.048,0.035,0.031,0.096,0.078	0.631,0.678,0.646,0.689,0.451	-0.561	SE	chr14:47726470:47726554:47726225:47726309:47730339:47730423	68	663	585	230	731	815
1794	ENSMUSG00000049643	2310022A10Rik	chr7	+	1794	158169111185202	227220134231191	154292206219171	11,12,20,17,30	244	122	0	0	0.258,0.278,0.293,0.286,0.346	0.875,0.924,0.837,0.866,0.74	-0.556	RI	chr7:27580336:27582099:27580336:27580691:27581350:27582099	825	1003	1042	90	1828	1132
2136	ENSMUSG00000031342	Gpm6b	chrX	+	2136	11,5,11,7,7	28,26,12,9,25	11,37,21,19,18	2,11,3,2,3	244	122	2.22045e-16	4.16281e-14	0.164,0.088,0.314,0.28,0.123	0.733,0.627,0.778,0.826,0.75	-0.549	A3SS	chrX:166385390:166388988:166386951:166388988:166383934:166384000	41	100	106	21	141	127
25256	ENSMUSG00000025656	Arhgef9	chrX	-	25256	8,4,9,1,5	9,4,3,5,3	38,57,21,14,32	1,1,0,3,0	183	122	5.20695e-13	2.93841e-11	0.372,0.4,0.667,0.118,0.526	0.962,0.974,1.0,0.757,1.0	-0.522	SE	chrX:95054228:95054290:95051523:95052154:95054942:95055011	27	24	162	5	51	167
4612	ENSMUSG00000054808	Actn4	chr7	-	4612	433259356303318	282181153212234	1.23215e+19	2,4,2,2,3	207	122	0	0	0.475,0.458,0.578,0.457,0.445	0.997,0.996,0.998,0.997,0.997	-0.514	SE	chr7:28911489:28911575:28909902:28909988:28912239:28912321	1669	1062	7144	13	2731	7157
46882	ENSMUSG00000028134	Ptbp2	chr3	-	46882	388350372424404	277179170229210	96,60,65,70,76	0,1,0,0,0	244	122	0	0	0.412,0.494,0.522,0.481,0.49	1.0,0.968,1.0,1.0,1.0	-0.514	SE	chr3:119751863:119752007:119747789:119747954:119761702:119761778	1938	1065	367	1	3003	368
420	ENSMUSG00000005506	Celf1	chr2	+	420	42,24,34,36,48	388229335251330	48,89,72,82,68	24,32,34,16,30	244	122	0	0	0.051,0.05,0.048,0.067,0.068	0.5,0.582,0.514,0.719,0.531	-0.512	RI	chr2:91013237:91019497:91013237:91013402:91016565:91019497	184	1533	359	136	1717	495
10139	ENSMUSG00000021276	Cinp	chr12	-	10139	8,0,16,0,11	21,29,8,13,5	10,33,6,19,6	0,14,4,3,0	244	122	3.50219e-06	8.48222e-05	0.16,0.0,0.5,0.0,0.524	1.0,0.541,0.429,0.76,1.0	-0.509	SE	chr12:110877222:110877372:110876840:110876970:110878987:110879039	35	76	74	21	111	95
17038	ENSMUSG00000031342	Gpm6b	chrX	+	17038	9,30,18,11,3	28,26,12,9,25	15,39,22,20,28	2,11,3,2,3	212	122	1.18604e-10	5.47758e-09	0.156,0.399,0.463,0.413,0.065	0.812,0.671,0.808,0.852,0.843	-0.498	SE	chrX:166385390:166385481:166383934:166384000:166386951:166388988	71	100	124	21	171	145
397	ENSMUSG00000034940	Synrg	chr11	+	397	43,12,12,17,16	18,8,8,8,11	12,17,19,18,20	0,0,0,1,1	244	122	2.22045e-16	1.57022e-14	0.544,0.429,0.429,0.515,0.421	1.0,1.0,1.0,0.9,0.909	-0.494	SE	chr11:83985248:83985551:83982195:83982307:83987912:83987990	100	53	86	2	153	88
25473	ENSMUSG00000079563	Pglyrp2	chr17	-	25473	6,6,13,9,16	32,47,17,17,23	18,54,53,27,36	4,11,7,17,9	244	122	2.33147e-15	1.56504e-13	0.086,0.06,0.277,0.209,0.258	0.692,0.711,0.791,0.443,0.667	-0.483	SE	chr17:32415805:32416103:32413099:32413474:32416877:32417088	50	136	188	48	186	236
13002	ENSMUSG00000024663	Rab3il1	chr19	+	13002	34,25,55,53,49	25,47,32,26,42	38,69,52,56,67	2,7,6,3,4	244	122	0	0	0.405,0.21,0.462,0.505,0.368	0.905,0.831,0.813,0.903,0.893	-0.479	SE	chr19:10028284:10028503:10027559:10027637:10030149:10030278	216	172	282	22	388	304
38629	ENSMUSG00000030172	Erc1	chr6	-	38629	18,11,16,4,10	10,7,5,15,8	28,13,23,27,16	2,0,0,0,4	205	122	1.51367e-10	6.8944e-09	0.517,0.483,0.656,0.137,0.427	0.893,1.0,1.0,1.0,0.704	-0.475	SE	chr6:119777987:119778071:119773733:119773901:119779476:119779632	59	45	107	6	104	113
20090	ENSMUSG00000004947	Dtx2	chr5	+	20090	45,50,33,53,73	96,85,60,105,133	62,110,123,93,100	34,23,18,23,14	244	122	0	0	0.19,0.227,0.216,0.202,0.215	0.477,0.705,0.774,0.669,0.781	-0.471	SE	chr5:136026469:136026607:136021754:136021858:136028498:136028572	254	479	488	112	733	600
17121	ENSMUSG00000036054	Sugp2	chr8	+	17121	39,41,20,42,46	22,24,32,28,29	57,79,101,66,59	0,1,5,5,11	208	122	0	0	0.51,0.501,0.268,0.468,0.482	1.0,0.979,0.922,0.886,0.759	-0.463	SE	chr8:70261230:70261317:70260441:70260589:70262870:70263105	188	135	362	22	323	384
6452	ENSMUSG00000036817	Sun1	chr5	+	6452	92,33,72,60,79	25,32,43,39,63	123136158136123	10,6,6,7,6	244	122	0	0	0.648,0.34,0.456,0.435,0.385	0.86,0.919,0.929,0.907,0.911	-0.452	SE	chr5:139229752:139229944:139226705:139226885:139230772:139230838	336	202	676	35	538	711
40942	ENSMUSG00000006498	Ptbp1	chr10	+	40942	67,48,26,60,70	70,55,49,30,0	14,17,26,16,23	0,0,0,0,0	152	122	7.99361e-15	5.16486e-13	0.434,0.412,0.299,0.616,1.0	1.0,1.0,1.0,1.0,1.0	-0.448	SE	chr10:79856503:79856534:79854426:79854721:79860823:79860969	271	204	96	0	475	96
45654	ENSMUSG00000037697	Ddhd1	chr14	-	45654	30,17,42,18,31	40,24,16,27,20	65,67,77,97,80	3,4,10,19,11	205	122	3.4861e-14	2.1277e-12	0.309,0.297,0.61,0.284,0.48	0.928,0.909,0.821,0.752,0.812	-0.448	SE	chr14:45599101:45599185:45588466:45595664:45601564:45601756	138	127	386	47	265	433
46635	ENSMUSG00000036333	Kidins220	chr12	+	46635	54,13,12,10,25	14,13,12,6,19	42,23,77,48,78	3,2,4,4,2	235	122	1.57652e-14	1.0007e-12	0.667,0.342,0.342,0.464,0.406	0.879,0.857,0.909,0.862,0.953	-0.448	SE	chr12:25040455:25040569:25038323:25038550:25051094:25051226	114	64	268	15	178	283
861	ENSMUSG00000025006	Sorbs1	chr19	-	861	6,6,16,9,7	7,9,12,10,13	50,53,50,33,20	4,4,4,3,13	151	122	3.64543e-10	1.59626e-08	0.409,0.35,0.519,0.421,0.303	0.91,0.915,0.91,0.899,0.554	-0.437	SE	chr19:40369689:40369719:40364993:40365166:40373475:40373617	44	51	206	28	95	234
48292	ENSMUSG00000027406	Idh3b	chr2	-	48292	902691736732720	522323343375353	8.76109e+18	44,33,45,34,22	244	122	0	0	0.464,0.517,0.518,0.494,0.505	0.909,0.943,0.923,0.939,0.963	-0.436	SE	chr2:130279555:130279726:130279312:130279437:130280262:130280323	3781	1916	5223	178	5697	5401
4067	ENSMUSG00000027357	Crls1	chr2	+	4067	3,2,2,3,8	25,30,15,27,17	3,6,9,4,10	0,24,9,16,0	207	122	0.000786161	0.011048	0.066,0.038,0.073,0.061,0.217	1.0,0.128,0.371,0.128,1.0	-0.434	SE	chr2:132861208:132861294:132849865:132850003:132864089:132864181	18	114	32	49	132	81
38267	ENSMUSG00000025162	Csnk1d	chr11	-	38267	164101146123158	427340328393452	348605535444496	152212266160208	184	122	0	0	0.203,0.165,0.228,0.172,0.188	0.603,0.654,0.571,0.648,0.613	-0.427	SE	chr11:120964947:120965010:120961748:120963906:120967994:120968134	692	1940	2428	998	2632	3426
35327	ENSMUSG00000042520	Ubap2l	chr3	-	35327	696310512375492	1.09869e+15	9.76965e+16	293323350231348	181	122	0	0	0.299,0.233,0.289,0.236,0.271	0.692,0.668,0.706,0.702,0.689	-0.426	SE	chr3:90031310:90031370:90028324:90028377:90034064:90034177	2385	4345	5135	1545	6730	6680
40130	ENSMUSG00000037938	Chchd5	chr2	+	40130	28,11,11,16,28	19,7,13,21,27	28,46,44,23,28	4,7,3,4,5	244	122	4.23772e-13	2.40858e-11	0.424,0.44,0.297,0.276,0.341	0.778,0.767,0.88,0.742,0.737	-0.425	SE	chr2:129130177:129130318:129129699:129129857:129133274:129134134	94	87	169	23	181	192
15610	ENSMUSG00000021000	Mia2	chr12	+	15610	503452482381479	205181152170154	614865811753748	0,0,9,0,5	244	122	0	0	0.551,0.555,0.613,0.528,0.609	1.0,1.0,0.978,1.0,0.987	-0.422	SE	chr12:59176330:59176459:59174105:59174188:59179849:59180008	2297	862	3791	14	3159	3805
28958	ENSMUSG00000020859	Spag9	chr11	+	28958	7,1,0,5,0	69,41,37,44,71	37,28,34,15,48	26,13,22,37,65	160	122	0	0	0.072,0.018,0.0,0.08,0.0	0.52,0.622,0.541,0.236,0.36	-0.422	SE	chr11:94113262:94113301:94112032:94112146:94114172:94114349	13	262	162	163	275	325
19456	ENSMUSG00000032468	Armc8	chr9	-	19456	132,171,123,94,126	66,60,45,55,46	143189149179167	0,0,0,0,0	203	122	0	0	0.546,0.631,0.622,0.507,0.622	1.0,1.0,1.0,1.0,1.0	-0.414	SE	chr9:99505264:99505346:99502511:99502598:99520486:99520582	646	272	827	0	918	827
20264	ENSMUSG00000020063	Sirt1	chr10	-	20264	78,30,46,45,80	36,14,38,23,29	70,104,147,111,99	9,5,3,4,1	238	122	0	0	0.526,0.523,0.383,0.501,0.586	0.799,0.914,0.962,0.934,0.981	-0.414	SE	chr10:63336979:63337096:63335635:63335877:63338564:63339032	279	140	531	22	419	553
1933	ENSMUSG00000022199	Slc22a17	chr14	-	1933	17,15,6,12,12	14,7,13,8,20	7,14,13,14,8	3,2,4,1,0	244	122	2.58713e-05	0.000512146	0.378,0.517,0.188,0.429,0.231	0.538,0.778,0.619,0.875,1.0	-0.413	RI	chr14:54907885:54908366:54907885:54908103:54908260:54908366	62	62	56	10	124	66
33841	ENSMUSG00000027940	Tpm3	chr3	+	33841	1.69814e+19	791745544759755	2.18328e+19	63,87,31,48,46	197	122	0	0	0.571,0.544,0.602,0.506,0.552	0.955,0.953,0.983,0.971,0.973	-0.412	SE	chr3:90088400:90088476:90087673:90087744:90089047:90089123	7220	3594	13168	275	10814	13443
21579	ENSMUSG00000026987	Baz2b	chr2	-	21579	10,9,0,2,11	5,8,14,12,7	10,32,18,19,16	12,3,5,5,0	244	122	9.70982e-05	0.001709	0.5,0.36,0.0,0.077,0.44	0.294,0.842,0.643,0.655,1.0	-0.411	SE	chr2:60206794:60206963:60161434:60161534:60209712:60209801	32	46	95	25	78	120
46779	ENSMUSG00000024013	Fgd2	chr17	+	46779	112,79,58,42,46	65,54,16,37,34	108188157119113	1,0,0,6,1	152	122	0	0	0.58,0.54,0.744,0.477,0.521	0.989,1.0,1.0,0.941,0.989	-0.411	SE	chr17:29373383:29373414:29373217:29373297:29374010:29374103	337	206	685	8	543	693
35326	ENSMUSG00000042520	Ubap2l	chr3	-	35326	505241334271329	1.09869e+15	660749911532879	293323350231348	196	122	0	0	0.223,0.179,0.197,0.171,0.187	0.584,0.591,0.618,0.589,0.611	-0.407	SE	chr3:90031295:90031370:90028324:90028377:90034064:90034177	1680	4345	3731	1545	6025	5276
20534	ENSMUSG00000050891	Tatdn1	chr15	-	20534	8,6,8,13,14	76,21,43,41,72	9,28,23,14,15	1,33,10,34,8	162	122	2.6135e-07	7.8607e-06	0.073,0.177,0.123,0.193,0.128	0.871,0.39,0.634,0.237,0.585	-0.405	SE	chr15:58916151:58916192:58905740:58905811:58921139:58921182	49	253	89	86	302	175
15749	ENSMUSG00000061755	Bod1l	chr5	-	15749	0,4,0,5,4	17,15,14,13,11	15,17,5,30,13	8,8,15,4,7	244	122	2.28934e-08	8.08032e-07	0.0,0.118,0.0,0.161,0.154	0.484,0.515,0.143,0.789,0.481	-0.396	SE	chr5:41791796:41791937:41787537:41788949:41794226:41794380	13	70	80	42	83	122
38101	ENSMUSG00000028863	Meaf6	chr4	+	38101	80,78,65,72,76	39,40,31,53,55	51,51,57,66,66	2,5,4,2,1	179	122	0	0	0.583,0.571,0.588,0.481,0.485	0.946,0.874,0.907,0.957,0.978	-0.391	SE	chr4:125107651:125107709:125107516:125107546:125108322:125108356	371	218	291	14	589	305
37843	ENSMUSG00000054702	Ap1s3	chr1	-	37843	21,17,12,10,2	6,8,1,22,2	6,20,6,26,14	0,0,1,4,0	230	122	1.44503e-06	3.7965e-05	0.65,0.53,0.864,0.194,0.347	1.0,1.0,0.761,0.775,1.0	-0.39	SE	chr1:79623681:79623790:79614202:79614340:79625106:79625285	62	39	72	5	101	77
38575	ENSMUSG00000016664	Pacsin2	chr15	-	38575	585440580539661	278216238236199	754984913815871	20,34,32,39,35	244	122	0	0	0.513,0.505,0.549,0.533,0.624	0.95,0.935,0.934,0.913,0.926	-0.387	SE	chr15:83379683:83379806:83378998:83379195:83381761:83381883	2805	1167	4337	160	3972	4497
3504	ENSMUSG00000014767	Tbp	chr17	+	3504	8,25,8,15,28	21,20,23,18,36	12,22,22,16,16	7,3,7,2,7	244	122	1.13187e-06	4.27236e-05	0.16,0.385,0.148,0.294,0.28	0.462,0.786,0.611,0.8,0.533	-0.385	A5SS	chr17:15501153:15501357:15501153:15501202:15502964:15503128	84	118	88	26	202	114
6430	ENSMUSG00000054099	Slc25a40	chr5	+	6430	0,3,0,0,0	3,5,12,17,16	16,6,21,4,3	4,4,8,9,7	212	122	1.6087e-11	8.00758e-10	0.0,0.257,0.0,0.0,0.0	0.697,0.463,0.602,0.204,0.198	-0.381	SE	chr5:8424796:8424887:8422872:8423039:8427195:8427267	3	53	50	32	56	82
12900	ENSMUSG00000037341	Slc9a7	chrX	-	12900	2,0,9,1,0	76,27,94,47,75	34,16,56,58,50	28,51,42,48,47	181	122	0	0	0.017,0.0,0.061,0.014,0.0	0.45,0.175,0.473,0.449,0.418	-0.375	SE	chrX:20138912:20138972:20131770:20131834:20158814:20158968	12	319	214	216	331	430
12212	ENSMUSG00000033526	Ppip5k1	chr2	-	12212	19,7,12,29,11	38,9,15,25,30	25,16,30,15,36	6,0,16,10,15	244	122	4.3808e-05	0.000835955	0.2,0.28,0.286,0.367,0.155	0.676,1.0,0.484,0.429,0.545	-0.369	SE	chr2:121332241:121332391:121331557:121331648:121334412:121334577	78	117	122	47	195	169
16600	ENSMUSG00000031631	Cfap97	chr8	+	16600	31,7,25,6,12	0,11,12,6,5	27,16,35,42,34	0,0,9,2,2	244	122	0.000421048	0.00634885	1.0,0.241,0.51,0.333,0.545	1.0,1.0,0.66,0.913,0.895	-0.368	SE	chr8:46164761:46164896:46163714:46163863:46169558:46170440	81	34	154	13	115	167
701	ENSMUSG00000028102	Pex11b	chr3	+	701	687632448542572	255187185244245	7.05109e+16	32,55,37,23,40	244	122	0	0	0.574,0.628,0.548,0.526,0.539	0.917,0.908,0.926,0.956,0.922	-0.363	RI	chr3:96643574:96644726:96643574:96644015:96644435:96644726	2881	1116	4669	187	3997	4856
42814	ENSMUSG00000033335	Dnm2	chr9	+	42814	292173239228240	215150186186215	447555503448520	61,98,109,69,108	244	122	0	0	0.404,0.366,0.391,0.38,0.358	0.786,0.739,0.698,0.765,0.707	-0.359	SE	chr9:21478898:21479037:21478280:21478348:21480406:21480545	1172	952	2473	445	2124	2918
34826	ENSMUSG00000090841	Myl6	chr10	-	34826	18,3,9,6,8	73,29,31,30,63	25,33,25,55,38	22,48,22,24,25	166	122	1.55431e-15	1.06315e-13	0.153,0.071,0.176,0.128,0.085	0.455,0.336,0.455,0.627,0.528	-0.358	SE	chr10:128491719:128491764:128491289:128491347:128492058:128492136	44	226	176	141	270	317
48425	ENSMUSG00000059208	Hnrnpm	chr17	-	48425	548442423453405	242258227214227	438537503477495	1,3,7,0,11	136	122	0	0	0.67,0.606,0.626,0.655,0.615	0.997,0.994,0.985,1.0,0.976	-0.356	SE	chr17:33658899:33658914:33658387:33658465:33660212:33660314	2271	1168	2450	22	3439	2472
2491	ENSMUSG00000015937	H2afy	chr13	-	2491	27,0,2,2,4	19,6,4,13,0	26,22,31,12,13	2,16,0,28,0	211	122	0.00173863	0.0222499	0.451,0.0,0.224,0.082,1.0	0.883,0.443,1.0,0.199,1.0	-0.354	SE	chr13:56084195:56084285:56073618:56074392:56096123:56096234	35	42	104	46	77	150
2386	ENSMUSG00000038828	Tmem214	chr5	+	2386	16,3,1,28,9	3,3,7,7,15	27,10,39,20,23	5,1,6,2,7	244	122	0.00139415	0.013172	0.727,0.333,0.067,0.667,0.231	0.73,0.833,0.765,0.833,0.622	-0.352	RI	chr5:30872686:30873144:30872686:30872904:30873042:30873144	57	35	119	21	92	140
399	ENSMUSG00000034940	Synrg	chr11	+	399	47,23,35,39,35	18,8,8,8,11	44,20,39,29,59	0,0,0,1,1	244	122	0	0	0.566,0.59,0.686,0.709,0.614	1.0,1.0,1.0,0.935,0.967	-0.347	SE	chr11:83986813:83987047:83982195:83982307:83987912:83987990	179	53	191	2	232	193
46492	ENSMUSG00000015314	Slamf6	chr1	+	46492	2.25521e+19	1.3371e+18	3.24232e+19	322257288319329	193	122	0	0	0.516,0.556,0.542,0.505,0.503	0.864,0.887,0.858,0.87,0.871	-0.346	SE	chr1:171941624:171941696:171939395:171939469:171947998:171948075	9767	5624	16070	1515	15391	17585
10053	ENSMUSG00000027361	Gabpb1	chr2	-	10053	10,18,10,9,14	1,10,2,11,10	10,8,7,10,6	0,1,0,2,0	219	122	1.21483e-07	3.84329e-06	0.848,0.501,0.736,0.313,0.438	1.0,0.817,1.0,0.736,1.0	-0.343	SE	chr2:126662990:126663088:126653554:126653722:126675355:126675544	61	34	41	3	95	44
1931	ENSMUSG00000022199	Slc22a17	chr14	-	1931	7,1,2,11,8	37,36,11,28,24	11,6,33,13,0	3,8,5,6,7	244	122	8.45224e-05	0.00143	0.086,0.014,0.083,0.164,0.143	0.647,0.273,0.767,0.52,0.0	-0.343	RI	chr14:54907518:54908366:54907518:54907630:54907885:54908366	29	136	63	29	165	92
12210	ENSMUSG00000033526	Ppip5k1	chr2	-	12210	37,8,25,33,26	23,10,2,20,17	12,6,52,23,61	1,1,0,5,4	244	122	9.05355e-07	2.49946e-05	0.446,0.286,0.862,0.452,0.433	0.857,0.75,1.0,0.697,0.884	-0.342	SE	chr2:121327644:121327770:121321654:121321792:121331557:121331648	129	72	154	11	201	165
1704	ENSMUSG00000042590	Ipo11	chr13	-	1704	7,16,10,16,26	7,0,6,6,2	30,23,27,33,34	0,0,1,0,0	244	122	3.54423e-10	1.55538e-08	0.333,1.0,0.455,0.571,0.867	1.0,1.0,0.931,1.0,1.0	-0.341	SE	chr13:106836211:106836426:106833713:106834836:106842088:106842210	75	21	147	1	96	148
36083	ENSMUSG00000062861	Zfp28	chr7	+	36083	45,57,21,17,17	15,19,16,16,11	32,14,22,46,40	1,8,2,4,0	236	122	5.43868e-06	0.00012692	0.608,0.608,0.404,0.355,0.444	0.943,0.475,0.85,0.856,1.0	-0.341	SE	chr7:6392181:6392296:6390399:6390560:6393366:6396915	157	77	154	15	234	169
48117	ENSMUSG00000042708	Shcbp1l	chr1	+	48117	7,2,0,3,1	4,4,6,1,12	16,8,12,11,12	9,20,3,1,1	244	122	0.00136547	0.0179795	0.467,0.2,0.0,0.6,0.04	0.471,0.167,0.667,0.846,0.857	-0.34	SE	chr1:153447723:153447974:153445797:153445951:153448900:153449023	13	27	59	34	40	93
5763	ENSMUSG00000029267	Mtf2	chr5	+	5763	25,26,15,34,17	19,24,21,10,19	52,28,48,48,37	5,13,1,11,10	234	122	1.0791e-05	0.00023522	0.407,0.361,0.271,0.639,0.318	0.844,0.529,0.962,0.695,0.659	-0.339	SE	chr5:108067459:108067572:108065756:108065965:108078865:108078974	117	93	213	40	210	253
45866	ENSMUSG00000034334	Fam151b	chr13	-	45866	20,11,20,33,34	13,11,11,4,13	12,18,23,21,28	0,0,10,0,4	244	122	0.00031799	0.00494991	0.435,0.333,0.476,0.805,0.567	1.0,1.0,0.535,1.0,0.778	-0.339	SE	chr13:92473962:92474128:92449832:92450252:92477827:92477953	118	52	102	14	170	116
27135	ENSMUSG00000057337	Chst3	chr10	-	27135	34,24,17,21,31	20,5,9,11,31	36,27,38,20,34	11,0,4,4,0	244	122	5.35902e-06	0.000125208	0.459,0.706,0.486,0.488,0.333	0.621,1.0,0.826,0.714,1.0	-0.338	SE	chr10:60194092:60194245:60188072:60188318:60218903:60219260	127	76	155	19	203	174
8143	ENSMUSG00000087174	5530601H04Rik	chrX	-	8143	26,97,41,42,53	46,46,40,22,40	55,62,62,53,60	18,32,4,3,10	244	122	4.30755e-06	0.000102574	0.22,0.513,0.339,0.488,0.398	0.604,0.492,0.886,0.898,0.75	-0.334	SE	chrX:105042603:105042817:105038816:105039812:105043129:105043304	259	194	292	67	453	359
1963	ENSMUSG00000038271	Iffo1	chr6	+	1963	10,6,10,18,15	26,17,18,22,26	38,33,47,25,30	9,8,24,22,15	244	122	6.49889e-08	3.87668e-06	0.161,0.15,0.217,0.29,0.224	0.679,0.673,0.495,0.362,0.5	-0.333	A3SS	chr6:125151794:125152771:125152613:125152771:125151384:125151525	59	109	173	78	168	251
15492	ENSMUSG00000072704	Smim10l1	chr6	+	15492	25,36,24,25,34	24,22,28,33,46	38,32,29,17,33	0,11,19,14,2	244	122	0.000226774	0.00366228	0.342,0.45,0.3,0.275,0.27	1.0,0.593,0.433,0.378,0.892	-0.332	SE	chr6:133106362:133106530:133105289:133105605:133107863:133107982	144	153	149	46	297	195
28065	ENSMUSG00000040363	Bcor	chrX	-	28065	56,30,35,40,51	49,55,50,32,52	79,26,67,58,95	8,12,17,17,35	175	122	8.60866e-11	4.01791e-09	0.443,0.275,0.328,0.466,0.406	0.873,0.602,0.733,0.704,0.654	-0.33	SE	chrX:12055638:12055692:12054968:12055155:12056343:12059190	212	238	325	89	450	414
21792	ENSMUSG00000024985	Tcf7l2	chr19	+	21792	0,3,0,0,7	22,20,5,32,17	16,13,3,7,14	7,12,23,5,14	196	122	3.38635e-08	1.15813e-06	0.0,0.085,0.0,0.0,0.204	0.587,0.403,0.075,0.466,0.384	-0.325	SE	chr19:55926681:55926756:55925976:55926049:55931433:55933229	10	96	53	61	106	114
806	ENSMUSG00000015377	Dennd6b	chr15	-	806	37,17,14,19,10	55,52,37,67,35	29,41,33,28,39	15,13,18,18,29	244	122	6.81677e-14	9.44609e-12	0.252,0.14,0.159,0.124,0.125	0.492,0.612,0.478,0.438,0.402	-0.324	RI	chr15:89186362:89186819:89186362:89186427:89186753:89186819	97	246	170	93	343	263
6353	ENSMUSG00000026782	Abi2	chr1	+	6353	123,55,53,63,88	23,29,9,12,19	103,57,88,68,129	0,0,0,0,0	244	122	0	0	0.728,0.487,0.746,0.724,0.698	1.0,1.0,1.0,1.0,1.0	-0.323	SE	chr1:60447259:60447406:60443984:60444082:60448077:60448202	382	92	445	0	474	445
3943	ENSMUSG00000044250	Pced1b	chr15	+	3943	5,10,6,6,5	14,25,12,18,17	16,15,9,16,17	8,11,5,7,9	244	122	5.64681e-09	2.14912e-07	0.152,0.167,0.2,0.143,0.128	0.5,0.405,0.474,0.533,0.486	-0.322	SE	chr15:97373955:97374149:97361199:97361335:97384027:97385676	32	86	73	40	118	113
34882	ENSMUSG00000032294	Pkm	chr9	+	34882	5.04738e+19	1.48413e+19	3.49066e+19	109261248231182	244	122	0	0	0.63,0.6,0.613,0.58,0.607	0.941,0.927,0.922,0.921,0.927	-0.322	SE	chr9:59675567:59675734:59675028:59675195:59678043:59678225	20570	6658	25981	1031	27228	27012
15950	ENSMUSG00000038271	Iffo1	chr6	+	15950	10,2,9,17,14	26,17,18,22,26	34,22,29,17,23	9,8,24,22,15	130	122	3.39897e-05	0.000668585	0.265,0.099,0.319,0.42,0.336	0.78,0.721,0.531,0.42,0.59	-0.321	SE	chr6:125151794:125151803:125151384:125151525:125152613:125152771	52	109	125	78	161	203
19253	ENSMUSG00000028078	Dclk2	chr3	-	19253	6,1,3,6,14	10,15,11,15,13	26,13,9,8,16	6,4,10,7,10	203	122	8.10276e-05	0.00145125	0.265,0.039,0.141,0.194,0.393	0.723,0.661,0.351,0.407,0.49	-0.32	SE	chr3:86789408:86789490:86787348:86787412:86791994:86792111	30	64	72	37	94	109
23581	ENSMUSG00000021569	Trip13	chr13	-	23581	504467451428451	129111131128133	340502515466411	4,8,4,1,0	222	122	0	0	0.682,0.698,0.654,0.648,0.651	0.979,0.972,0.986,0.996,1.0	-0.32	SE	chr13:73920347:73920448:73919994:73920101:73921172:73921214	2301	632	2234	17	2933	2251
34903	ENSMUSG00000032624	Eml4	chr17	+	34903	199,103,130,96,147	216,99,150,121,108	144,99,229,144,241	42,40,35,35,54	154	122	0	0	0.422,0.452,0.407,0.386,0.519	0.731,0.662,0.838,0.765,0.78	-0.318	SE	chr17:83428215:83428248:83427999:83428025:83440030:83440154	675	694	857	206	1369	1063
18214	ENSMUSG00000092416	Zfp141	chr7	-	18214	12,14,17,13,16	6,7,5,3,3	16,20,12,5,8	0,0,1,0,0	189	122	8.95283e-11	4.17364e-09	0.564,0.564,0.687,0.737,0.775	1.0,1.0,0.886,1.0,1.0	-0.312	SE	chr7:42501357:42501425:42489434:42489561:42505609:42505726	72	24	61	1	96	62
3194	ENSMUSG00000023235	Ccl25	chr8	+	3194	24,6,5,21,12	35,25,15,26,21	17,5,16,25,19	0,18,7,12,14	164	122	0.00481216	0.0467074	0.338,0.151,0.199,0.375,0.298	1.0,0.171,0.63,0.608,0.502	-0.31	A5SS	chr8:4327756:4327893:4327756:4327850:4353882:4354000	68	122	82	51	190	133
8689	ENSMUSG00000033793	Atp6v1h	chr1	+	8689	897722807646755	322282246280201	9.50101e+18	18,13,15,28,19	175	122	0	0	0.66,0.641,0.696,0.617,0.724	0.974,0.982,0.983,0.965,0.979	-0.309	SE	chr1:5101069:5101123:5098028:5098133:5117389:5117487	3827	1331	5589	93	5158	5682
13519	ENSMUSG00000020696	Rffl	chr11	-	13519	58,25,23,23,40	16,13,14,20,35	70,92,45,58,48	3,7,18,3,11	205	122	5.55953e-07	1.58333e-05	0.683,0.534,0.494,0.406,0.405	0.933,0.887,0.598,0.92,0.722	-0.308	SE	chr11:82811027:82811111:82810007:82810218:82812399:82812810	169	98	313	42	267	355
19652	ENSMUSG00000012609	Ttll5	chr12	+	19652	13,17,19,7,22	13,9,23,5,13	20,10,27,31,32	3,7,3,5,5	244	122	3.81111e-05	0.000740061	0.333,0.486,0.292,0.412,0.458	0.769,0.417,0.818,0.756,0.762	-0.308	SE	chr12:86024219:86024342:86012647:86012862:86053142:86053522	78	63	120	23	141	143
15664	ENSMUSG00000029165	Agbl5	chr5	+	15664	5,14,10,17,17	15,4,4,8,14	20,8,8,16,5	4,0,5,1,1	244	122	0.00275521	0.0332313	0.143,0.636,0.556,0.515,0.378	0.714,1.0,0.444,0.889,0.714	-0.307	SE	chr5:30905017:30905155:30904702:30904815:30905630:30905761	63	45	57	11	108	68
7671	ENSMUSG00000033287	Kctd17	chr15	+	7671	26,11,9,13,10	3,4,4,6,12	2,8,15,11,30	1,0,0,0,0	184	122	2.16427e-10	9.70179e-09	0.852,0.646,0.599,0.59,0.356	0.57,1.0,1.0,1.0,1.0	-0.305	SE	chr15:78436900:78436963:78435584:78435710:78437583:78437671	69	29	66	1	98	67
2134	ENSMUSG00000058392	Rrp1b	chr17	+	2134	42,5,17,15,16	6,7,4,2,7	10,10,17,10,6	0,4,0,0,0	244	122	1.63722e-05	0.000427835	0.778,0.263,0.68,0.789,0.533	1.0,0.556,1.0,1.0,1.0	-0.303	A5SS	chr17:32045928:32046229:32045928:32046011:32048552:32048638	95	26	53	4	121	57
47012	ENSMUSG00000074513	Arfip1	chr3	-	47012	87,55,111,57,60	61,57,57,75,101	90,91,123,110,156	33,17,41,25,41	217	122	1.0678e-10	4.94882e-09	0.445,0.352,0.523,0.299,0.25	0.605,0.751,0.628,0.712,0.681	-0.302	SE	chr3:84529169:84529265:84527685:84527798:84534586:84534695	370	351	570	157	721	727
5857	ENSMUSG00000014767	Tbp	chr17	+	5857	0,0,0,0,1	21,20,23,18,36	2,3,4,1,1	7,3,7,2,7	124	122	5.77124e-07	2.64202e-05	0.0,0.0,0.0,0.0,0.027	0.219,0.496,0.36,0.33,0.123	-0.3	A3SS	chr17:15502961:15503128:15502964:15503128:15501153:15501202	1	118	11	26	119	37
38710	ENSMUSG00000085399	Foxd2os	chr4	+	38710	158,138,68,142,165	198160121181170	151219153170202	76,60,55,69,63	237	122	0	0	0.291,0.307,0.224,0.288,0.333	0.506,0.653,0.589,0.559,0.623	-0.297	SE	chr4:114920439:114920555:114916188:114916310:114921768:114921967	671	830	895	323	1501	1218
43095	ENSMUSG00000027333	Smox	chr2	+	43095	9,15,10,15,14	10,3,6,4,8	11,15,10,13,10	2,7,1,0,0	244	122	0.0033704	0.0395359	0.31,0.714,0.455,0.652,0.467	0.733,0.517,0.833,1.0,1.0	-0.297	SE	chr2:131520411:131520646:131520094:131520268:131522058:131522219	63	31	59	10	94	69
47772	ENSMUSG00000052760	A630001G21Rik	chr1	-	47772	78,52,46,81,64	25,18,21,25,18	100,68,72,104,57	10,1,8,1,6	244	122	1.39377e-12	7.63727e-11	0.609,0.591,0.523,0.618,0.64	0.833,0.971,0.818,0.981,0.826	-0.29	SE	chr1:85726458:85726615:85723097:85723181:85736471:85736581	321	107	401	26	428	427
6191	ENSMUSG00000002279	Lmf1	chr17	+	6191	45,64,53,41,41	4,12,12,14,11	68,84,91,64,57	0,1,0,1,0	244	122	0	0	0.849,0.727,0.688,0.594,0.651	1.0,0.977,1.0,0.97,1.0	-0.288	SE	chr17:25585542:25585852:25579173:25579379:25612295:25612444	244	53	364	2	297	366
12317	ENSMUSG00000037369	Kdm6a	chrX	+	12317	35,11,73,23,36	45,4,36,9,7	80,24,55,34,75	14,3,8,4,2	244	122	3.44175e-06	8.35626e-05	0.28,0.579,0.503,0.561,0.72	0.741,0.8,0.775,0.81,0.949	-0.286	SE	chrX:18247566:18247722:18246196:18246416:18248269:18248359	178	101	268	31	279	299
43446	ENSMUSG00000023235	Ccl25	chr8	+	43446	59,60,29,31,35	35,25,15,26,21	87,56,90,52,41	0,18,7,12,14	244	122	3.9653e-06	9.52247e-05	0.457,0.545,0.492,0.373,0.455	1.0,0.609,0.865,0.684,0.594	-0.286	SE	chr8:4349771:4349894:4327756:4327850:4353882:4354000	214	122	326	51	336	377
2523	ENSMUSG00000074238	Ap1ar	chr3	-	2523	690805611802923	256187161244230	9.35138e+18	37,37,34,19,44	220	122	0	0	0.599,0.705,0.678,0.646,0.69	0.933,0.954,0.951,0.971,0.931	-0.284	SE	chr3:127815595:127815694:127813239:127813295:127816909:127817006	3831	1078	5731	171	4909	5902
5308	ENSMUSG00000097039	Pvt1	chr15	+	5308	31,21,22,39,26	8,11,22,9,4	17,19,1,12,16	0,0,0,7,1	244	122	0.00106487	0.0144529	0.66,0.488,0.333,0.684,0.765	1.0,1.0,1.0,0.462,0.889	-0.284	SE	chr15:62244718:62244857:62242433:62242561:62258420:62258637	139	54	65	8	193	73
7619	ENSMUSG00000030498	Gas2	chr7	+	7619	29,31,12,43,58	21,26,3,20,19	26,9,26,14,20	1,1,6,3,1	217	122	1.56883e-05	0.000329653	0.437,0.401,0.692,0.547,0.632	0.936,0.835,0.709,0.724,0.918	-0.283	SE	chr7:51863997:51864093:51862014:51862444:51864281:51864369	173	89	95	12	262	107
21529	ENSMUSG00000030016	Zfp638	chr6	+	21529	25,12,15,21,7	11,12,21,5,5	19,25,9,9,26	5,2,4,1,3	205	122	0.000347348	0.00535354	0.575,0.373,0.298,0.714,0.454	0.693,0.882,0.572,0.843,0.838	-0.283	SE	chr6:83957508:83957592:83954710:83954761:83959930:83959968	80	54	88	15	134	103
22036	ENSMUSG00000018412	Kansl1	chr11	-	22036	159,91,106,131,135	53,60,67,82,61	139124198107171	15,20,39,17,22	244	122	2.88658e-15	1.93114e-13	0.6,0.431,0.442,0.444,0.525	0.822,0.756,0.717,0.759,0.795	-0.281	SE	chr11:104342858:104343047:104342362:104342511:104343490:104343673	622	323	739	113	945	852
32817	ENSMUSG00000007035	Msh5	chr17	-	32817	29,25,26,31,42	20,37,28,18,22	38,29,37,41,18	11,12,0,5,13	204	122	0.000322904	0.00501772	0.464,0.288,0.357,0.507,0.533	0.674,0.591,1.0,0.831,0.453	-0.28	SE	chr17:35042097:35042180:35041469:35041515:35044024:35044134	153	125	163	41	278	204
25844	ENSMUSG00000024589	Nedd4l	chr18	+	25844	53,62,64,76,61	24,15,12,0,13	95,96,143,97,123	0,0,0,0,0	244	122	0	0	0.525,0.674,0.727,1.0,0.701	1.0,1.0,1.0,1.0,1.0	-0.275	SE	chr18:65172274:65172406:65165571:65165646:65178918:65178996	316	64	554	0	380	554
7673	ENSMUSG00000033287	Kctd17	chr15	+	7673	31,18,19,22,19	3,4,4,6,12	8,11,16,13,32	1,0,0,0,0	215	122	1.1266e-10	5.21524e-09	0.854,0.719,0.729,0.675,0.473	0.819,1.0,1.0,1.0,1.0	-0.274	SE	chr15:78436900:78436994:78435584:78435710:78437583:78437671	109	29	80	1	138	81
22173	ENSMUSG00000026068	Il18rap	chr1	+	22173	3,4,14,8,10	0,4,7,1,0	18,17,27,19,19	0,0,0,0,0	244	122	5.55814e-06	0.000129403	1.0,0.333,0.5,0.8,1.0	1.0,1.0,1.0,1.0,1.0	-0.273	SE	chr1:40542989:40543127:40541691:40542038:40547766:40547903	39	12	100	0	51	100
35900	ENSMUSG00000033075	Senp1	chr15	-	35900	21,12,32,43,22	188149152193218	73,74,125,129,61	110,64,153,115,79	199	122	0	0	0.064,0.047,0.114,0.12,0.058	0.289,0.415,0.334,0.407,0.321	-0.273	SE	chr15:98061949:98062027:98059915:98059954:98064818:98064873	130	900	462	521	1030	983
43337	ENSMUSG00000083161	Gm11427	chr11	+	43337	128,115,91,97,83	56,32,32,52,50	15,51,90,39,42	0,0,24,7,10	244	122	9.41174e-05	0.00166466	0.533,0.642,0.587,0.483,0.454	1.0,1.0,0.652,0.736,0.677	-0.273	SE	chr11:83241534:83241751:83225533:83225685:83243817:83243996	514	222	237	41	736	278
5369	ENSMUSG00000038866	Zcchc2	chr1	+	5369	76,40,93,69,84	32,20,29,40,30	77,55,54,58,99	3,7,13,4,6	205	122	9.53865e-11	4.43631e-09	0.586,0.543,0.656,0.507,0.625	0.939,0.824,0.712,0.896,0.908	-0.272	SE	chr1:106018218:106018302:106015998:106016093:106019847:106019905	362	151	343	33	513	376
47013	ENSMUSG00000074513	Arfip1	chr3	-	47013	25,13,44,16,23	61,57,57,75,101	42,28,39,34,60	33,17,41,25,41	196	122	4.85956e-12	2.58083e-10	0.203,0.124,0.325,0.117,0.124	0.442,0.506,0.372,0.458,0.477	-0.272	SE	chr3:84529190:84529265:84527685:84527798:84534586:84534695	121	351	203	157	472	360
15507	ENSMUSG00000023008	Fmnl3	chr15	-	15507	15,8,7,6,5	43,17,33,32,25	56,77,121,70,101	75,39,69,54,99	244	122	3.61378e-13	2.06579e-11	0.149,0.19,0.096,0.086,0.091	0.272,0.497,0.467,0.393,0.338	-0.271	SE	chr15:99329279:99329432:99328057:99328166:99331986:99332070	41	150	425	336	191	761
38097	ENSMUSG00000024378	Stard4	chr18	-	38097	48,19,44,44,21	31,10,28,7,15	40,74,63,54,69	14,6,7,3,12	226	122	2.30084e-05	0.000468818	0.455,0.506,0.459,0.772,0.43	0.607,0.869,0.829,0.907,0.756	-0.269	SE	chr18:33205220:33205325:33203404:33203815:33206119:33206246	176	91	300	42	267	342
35452	ENSMUSG00000019978	Epb41l2	chr10	+	35452	194148171138192	36,27,40,46,46	190166298143248	9,4,5,3,6	244	122	0	0	0.729,0.733,0.681,0.6,0.676	0.913,0.954,0.968,0.96,0.954	-0.266	SE	chr10:25501823:25502138:25488950:25489093:25506174:25506273	843	195	1045	27	1038	1072
1348	ENSMUSG00000031851	Ntpcr	chr8	+	1348	6,9,11,14,15	5,0,10,0,13	2,4,11,11,11	0,0,0,0,1	125	122	3.45637e-08	2.23078e-06	0.539,1.0,0.518,1.0,0.53	1.0,1.0,1.0,1.0,0.915	-0.266	A3SS	chr8:125745235:125745445:125745239:125745445:125736067:125736230	55	28	39	1	83	40
22178	ENSMUSG00000033423	Eri3	chr4	+	22178	62,61,47,55,60	30,26,16,19,26	41,87,74,44,44	1,1,12,17,0	197	122	1.03243e-07	3.3031e-06	0.561,0.592,0.645,0.642,0.588	0.962,0.982,0.792,0.616,1.0	-0.265	SE	chr4:117552967:117553043:117550364:117550730:117582599:117582716	285	117	290	31	402	321
38811	ENSMUSG00000021271	Zfp839	chr12	+	38811	6,4,8,17,9	29,18,13,26,39	8,24,69,46,31	15,32,15,16,31	244	122	3.25199e-05	0.000643456	0.094,0.1,0.235,0.246,0.103	0.211,0.273,0.697,0.59,0.333	-0.265	SE	chr12:110860795:110861023:110854999:110855872:110863963:110864056	44	125	178	109	169	287
21103	ENSMUSG00000086629	2810403D21Rik	chrX	+	21103	9,1,0,1,0	61,32,11,22,45	9,15,3,9,0	4,5,24,19,9	226	122	7.18648e-06	0.000163476	0.074,0.017,0.0,0.024,0.0	0.548,0.618,0.063,0.204,0.0	-0.264	SE	chrX:108858267:108858372:108836265:108836355:108886344:108886896	11	171	36	61	182	97
5686	ENSMUSG00000057897	Camk2b	chr11	-	5686	30,6,4,27,29	0,5,7,3,8	78,36,17,52,40	0,4,0,0,0	124	122	5.62998e-08	3.51829e-06	1.0,0.541,0.36,0.899,0.781	1.0,0.899,1.0,1.0,1.0	-0.264	A3SS	chr11:5982720:5982761:5982720:5982758:5988100:5988143	96	23	223	4	119	227
7026	ENSMUSG00000085741	5430405H02Rik	chr2	-	7026	11,4,3,29,15	0,0,7,14,0	24,24,35,27,13	0,0,0,0,0	244	122	4.19184e-05	0.000804541	1.0,1.0,0.176,0.509,1.0	1.0,1.0,1.0,1.0,1.0	-0.263	SE	chr2:156853430:156854018:156852429:156852690:156862598:156862945	62	21	123	0	83	123
41461	ENSMUSG00000074829	2010315B03Rik	chr9	-	41461	1,2,5,0,1	11,13,17,26,8	11,4,9,15,8	14,10,7,12,17	184	122	6.98446e-08	2.29948e-06	0.057,0.093,0.163,0.0,0.077	0.343,0.21,0.46,0.453,0.238	-0.263	SE	chr9:124304655:124304718:124295357:124295484:124312559:124312642	9	75	47	60	84	107
44081	ENSMUSG00000040785	Ttc3	chr16	+	44081	36,61,50,36,50	26,13,21,37,21	28,48,61,35,58	11,4,5,4,4	185	122	3.15168e-06	7.72767e-05	0.477,0.756,0.611,0.391,0.611	0.627,0.888,0.889,0.852,0.905	-0.263	SE	chr16:94412059:94412123:94403313:94403368:94415948:94415958	233	118	230	28	351	258
7027	ENSMUSG00000085741	5430405H02Rik	chr2	-	7027	9,3,5,21,24	0,0,7,14,0	24,27,24,18,14	0,0,0,0,0	244	122	1.83685e-05	0.000380332	1.0,1.0,0.263,0.429,1.0	1.0,1.0,1.0,1.0,1.0	-0.262	SE	chr2:156853430:156854304:156852429:156852690:156862598:156862894	62	21	107	0	83	107
22757	ENSMUSG00000019054	Fis1	chr5	+	22757	5,16,14,15,24	4,2,3,1,5	14,14,5,1,7	2,0,0,0,0	244	122	1.01611e-06	2.77242e-05	0.385,0.8,0.7,0.882,0.706	0.778,1.0,1.0,1.0,1.0	-0.261	SE	chr5:136964208:136964395:136962076:136962228:136965092:136965169	74	15	41	2	89	43
1764	ENSMUSG00000039990	Edrf1	chr7	+	1764	258171181167145	41,31,44,35,33	199153208182224	0,1,2,1,2	223	122	0	0	0.775,0.751,0.692,0.723,0.706	1.0,0.988,0.983,0.99,0.984	-0.26	SE	chr7:133646989:133647091:133643992:133644149:133647344:133647466	922	184	966	6	1106	972
24060	ENSMUSG00000063179	Pstk	chr7	+	24060	151,78,61,67,81	112,54,105,75,104	90190178123155	27,68,42,57,72	244	122	1.55801e-10	7.08012e-09	0.403,0.419,0.225,0.309,0.28	0.625,0.583,0.679,0.519,0.518	-0.258	SE	chr7:131373535:131373830:131371140:131371389:131374064:131374263	438	450	736	266	888	1002
36659	ENSMUSG00000026743	Mllt10	chr2	+	36659	88,59,88,60,70	38,26,20,21,14	74,50,73,78,128	0,2,6,0,13	176	122	1.07692e-14	6.89087e-13	0.616,0.611,0.753,0.664,0.776	1.0,0.945,0.894,1.0,0.872	-0.258	SE	chr2:18101457:18101512:18082510:18082725:18109781:18109891	365	119	403	21	484	424
20533	ENSMUSG00000050891	Tatdn1	chr15	-	20533	93,47,55,45,40	76,21,43,41,72	56,56,59,38,33	1,33,10,34,8	198	122	0.00079813	0.0112045	0.43,0.58,0.441,0.403,0.255	0.972,0.511,0.784,0.408,0.718	-0.257	SE	chr15:58909572:58909649:58905740:58905811:58921139:58921182	280	253	242	86	533	328
24182	ENSMUSG00000062949	Atp11c	chrX	-	24182	7,1,15,6,12	42,46,44,21,20	36,28,30,29,62	46,7,80,28,49	226	122	3.53525e-06	8.55242e-05	0.083,0.012,0.155,0.134,0.245	0.297,0.683,0.168,0.359,0.406	-0.257	SE	chrX:60229147:60229252:60223289:60225793:60236556:60236710	41	173	185	210	214	395
28868	ENSMUSG00000097755	2010110K18Rik	chr18	+	28868	5,24,20,12,15	9,2,0,5,4	4,29,25,11,8	0,3,0,0,1	207	122	2.34013e-05	0.000476091	0.247,0.876,1.0,0.586,0.688	1.0,0.851,1.0,1.0,0.825	-0.256	SE	chr18:34754483:34754569:34751808:34752135:34758231:34758685	76	20	77	4	96	81
2924	ENSMUSG00000026082	Rev1	chr1	-	2924	28,15,13,16,29	16,12,14,8,10	30,17,36,13,19	7,2,5,3,7	244	122	0.000482849	0.00557576	0.467,0.385,0.317,0.5,0.592	0.682,0.81,0.783,0.684,0.576	-0.255	RI	chr1:38074314:38075023:38074314:38074443:38074898:38075023	101	60	115	24	161	139
13080	ENSMUSG00000035958	Tdp2	chr13	+	13080	7,0,0,0,0	38,48,17,27,16	4,0,3,6,3	1,15,19,6,6	213	122	9.60037e-05	0.00169424	0.095,0.0,0.0,0.0,0.0	0.696,0.0,0.083,0.364,0.223	-0.254	SE	chr13:24836854:24836946:24831678:24831929:24840387:24840558	7	146	16	47	153	63
32034	ENSMUSG00000069769	Msi2	chr11	-	32034	56,57,20,36,43	5,7,11,8,2	27,20,8,18,24	0,0,0,0,0	244	122	9.42418e-11	4.38822e-09	0.848,0.803,0.476,0.692,0.915	1.0,1.0,1.0,1.0,1.0	-0.253	SE	chr11:88348783:88348992:88343888:88344660:88366784:88366847	212	33	97	0	245	97
18870	ENSMUSG00000025261	Huwe1	chrX	+	18870	20,9,13,11,10	6,0,3,1,5	28,17,20,8,19	0,0,0,0,0	220	122	2.26929e-09	9.21465e-08	0.649,1.0,0.706,0.859,0.526	1.0,1.0,1.0,1.0,1.0	-0.252	SE	chrX:151906264:151906363:151905355:151905431:151906950:151907084	63	15	92	0	78	92
32032	ENSMUSG00000069769	Msi2	chr11	-	32032	68,66,44,75,55	21,24,14,20,14	44,84,84,80,70	7,4,0,0,4	194	122	1.17684e-14	7.50602e-13	0.671,0.634,0.664,0.702,0.712	0.798,0.93,1.0,1.0,0.917	-0.252	SE	chr11:88347052:88347125:88339381:88344660:88348783:88348938	308	93	362	15	401	377
32818	ENSMUSG00000007035	Msh5	chr17	-	32818	50,33,16,24,37	20,37,28,18,22	16,20,28,30,59	11,12,0,5,13	157	122	0.00118106	0.0158401	0.66,0.409,0.307,0.509,0.567	0.531,0.564,1.0,0.823,0.779	-0.249	SE	chr17:35043728:35043764:35041469:35041515:35044024:35044134	160	125	153	41	285	194
22810	ENSMUSG00000037363	Letm2	chr8	-	22810	6,17,15,25,27	4,6,3,6,13	7,45,19,20,11	2,6,2,1,0	241	122	0.000883342	0.012266	0.432,0.589,0.717,0.678,0.513	0.639,0.792,0.828,0.91,1.0	-0.248	SE	chr8:25585348:25585468:25581672:25581786:25586606:25586807	90	32	102	11	122	113
32033	ENSMUSG00000069769	Msi2	chr11	-	32033	47,53,26,36,40	5,7,11,8,2	16,39,21,21,19	0,0,0,0,0	244	122	1.40453e-11	7.07044e-10	0.825,0.791,0.542,0.692,0.909	1.0,1.0,1.0,1.0,1.0	-0.248	SE	chr11:88348783:88348938:88339381:88344660:88366784:88366847	202	33	116	0	235	116
44425	ENSMUSG00000033543	Gtf2a2	chr9	+	44425	19,12,8,22,12	125,82,75,101,72	20,16,12,15,20	16,49,26,5,24	244	122	1.52226e-07	4.71805e-06	0.071,0.068,0.051,0.098,0.077	0.385,0.14,0.188,0.6,0.294	-0.248	SE	chr9:70018679:70018818:70016818:70016923:70022436:70022515	73	455	83	120	528	203
1788	ENSMUSG00000023764	Sfi1	chr11	-	1788	11,32,4,27,35	9,7,3,3,0	35,46,37,29,23	0,2,1,5,1	244	122	0.00239304	0.0309932	0.379,0.696,0.4,0.818,1.0	1.0,0.92,0.949,0.744,0.92	-0.248	A3SS	chr11:3133071:3135542:3133071:3133207:3135653:3135830	109	22	170	9	131	179
2356	ENSMUSG00000040669	Phc1	chr6	-	2356	12,6,5,13,7	2,2,1,3,4	27,53,26,55,29	0,0,0,1,0	145	122	1.39666e-07	7.53239e-06	0.835,0.716,0.808,0.785,0.596	1.0,1.0,1.0,0.979,1.0	-0.248	A3SS	chr6:122332521:122332677:122332521:122332653:122333290:122333440	43	12	190	1	55	191
8469	ENSMUSG00000024766	Lipo3	chr19	-	8469	194160128134126	32,0,41,37,35	474470478293359	6,8,10,2,3	244	122	0	0	0.752,1.0,0.61,0.644,0.643	0.975,0.967,0.96,0.987,0.984	-0.245	SE	chr19:33579361:33579498:33559511:33559655:33580464:33580574	742	145	2074	29	887	2103
805	ENSMUSG00000015377	Dennd6b	chr15	-	805	21,14,18,10,4	4,4,0,6,1	16,24,24,15,22	0,5,0,0,0	244	122	0.000105024	0.00169788	0.724,0.636,1.0,0.455,0.667	1.0,0.706,1.0,1.0,1.0	-0.245	RI	chr15:89186171:89186819:89186171:89186261:89186753:89186819	67	15	101	5	82	106
11316	ENSMUSG00000074165	Zfp788	chr7	+	11316	2,4,2,1,0	14,7,15,16,10	2,4,12,3,15	11,6,9,27,5	152	122	0.00101919	0.0139185	0.103,0.314,0.097,0.048,0.0	0.127,0.349,0.517,0.082,0.707	-0.244	SE	chr7:41634679:41634710:41633202:41633694:41647490:41647548	9	62	36	58	71	94
37819	ENSMUSG00000097290	1300002E11Rik	chr16	+	37819	29,21,33,28,24	61,53,40,48,44	33,23,72,61,74	25,49,30,31,18	244	122	6.0432e-05	0.00111561	0.192,0.165,0.292,0.226,0.214	0.398,0.19,0.545,0.496,0.673	-0.243	SE	chr16:21802954:21803097:21801280:21801356:21808677:21808820	135	246	263	153	381	416
14413	ENSMUSG00000023764	Sfi1	chr11	-	14413	13,35,4,20,25	9,7,3,3,0	30,42,36,28,21	0,2,1,5,1	244	122	0.00220508	0.0273803	0.419,0.714,0.4,0.769,1.0	1.0,0.913,0.947,0.737,0.913	-0.242	SE	chr11:3134625:3135542:3133071:3133207:3135653:3135830	97	22	157	9	119	166
45864	ENSMUSG00000034334	Fam151b	chr13	-	45864	51,35,49,34,33	13,11,11,4,13	50,37,42,40,52	0,0,10,0,4	244	122	4.97296e-06	0.000116876	0.662,0.614,0.69,0.81,0.559	1.0,1.0,0.677,1.0,0.867	-0.242	SE	chr13:92466976:92467112:92449624:92450252:92477827:92477953	202	52	221	14	254	235
13488	ENSMUSG00000042213	Zfand4	chr6	+	13488	18,10,23,16,11	24,8,16,40,29	18,39,29,28,22	7,16,6,21,21	197	122	0.000708746	0.0100732	0.317,0.436,0.471,0.199,0.19	0.614,0.602,0.75,0.452,0.393	-0.24	SE	chr6:116284739:116284815:116273572:116273872:116305616:116305761	78	117	136	71	195	207
25237	ENSMUSG00000034401	Spata6	chr4	+	25237	41,56,18,60,86	14,21,7,18,15	114184137167165	17,14,7,10,14	244	122	4.041e-09	1.5671e-07	0.594,0.571,0.563,0.625,0.741	0.77,0.868,0.907,0.893,0.855	-0.24	SE	chr4:111746140:111746278:111719983:111720257:111767662:111767704	261	75	767	62	336	829
21012	ENSMUSG00000047766	Lrrc49	chr9	-	21012	50,48,35,39,32	30,23,13,41,30	84,68,32,91,72	16,7,17,22,16	244	122	5.1352e-05	0.000963233	0.455,0.511,0.574,0.322,0.348	0.724,0.829,0.485,0.674,0.692	-0.239	SE	chr9:60680504:60680702:60680068:60680171:60685034:60685122	204	137	347	78	341	425
17836	ENSMUSG00000021624	Cd180	chr13	+	17836	46,36,51,52,60	14,11,9,15,22	12,26,22,37,51	4,0,0,1,5	244	122	1.01096e-05	0.00022183	0.622,0.621,0.739,0.634,0.577	0.6,1.0,1.0,0.949,0.836	-0.238	SE	chr13:102702700:102702867:102693557:102693789:102739165:102739629	245	71	148	10	316	158
36872	ENSMUSG00000037395	Rcor3	chr1	-	36872	36,47,20,19,26	19,13,8,8,11	15,48,41,9,29	0,2,5,3,3	179	122	2.74205e-06	6.81654e-05	0.564,0.711,0.63,0.618,0.617	1.0,0.942,0.848,0.672,0.868	-0.238	SE	chr1:192108643:192108701:192101387:192101867:192116268:192116346	148	59	142	13	207	155
14016	ENSMUSG00000019813	Cep57l1	chr10	-	14016	72,109,101,79,82	151,106,116,92,156	87243140149128	44,95,91,66,72	208	122	1.61426e-13	9.41781e-12	0.219,0.376,0.338,0.335,0.236	0.537,0.6,0.474,0.57,0.51	-0.237	SE	chr10:41728627:41728714:41723860:41723938:41729330:41729408	443	621	747	368	1064	1115
20043	ENSMUSG00000000326	Comt	chr16	-	20043	104,82,71,121,138	38,47,37,40,47	141181182156168	14,14,27,28,12	178	122	3.66374e-15	2.43056e-13	0.652,0.545,0.568,0.675,0.668	0.873,0.899,0.822,0.792,0.906	-0.237	SE	chr16:18424303:18424360:18411689:18411957:18426355:18426604	516	209	828	95	725	923
39887	ENSMUSG00000021870	Slmap	chr14	-	39887	14,11,23,12,28	4,9,1,5,1	21,5,16,11,20	2,0,0,0,0	172	122	2.88111e-07	8.58104e-06	0.713,0.464,0.942,0.63,0.952	0.882,1.0,1.0,1.0,1.0	-0.236	SE	chr14:26459409:26459460:26453537:26453600:26459903:26459954	88	20	73	2	108	75
44306	ENSMUSG00000107283	Mpv17	chr5	-	44306	79,67,76,63,67	13,27,10,29,26	54,82,69,58,60	9,11,2,1,3	244	122	2.84149e-06	7.02776e-05	0.752,0.554,0.792,0.521,0.563	0.75,0.788,0.945,0.967,0.909	-0.235	SE	chr5:31144893:31145278:31144073:31144752:31145494:31145590	352	105	323	26	457	349
12453	ENSMUSG00000046111	Cep295	chr9	-	12453	57,35,56,41,43	14,7,15,21,17	42,64,56,54,101	1,8,3,2,25	244	122	4.61782e-05	0.00087529	0.671,0.714,0.651,0.494,0.558	0.955,0.8,0.903,0.931,0.669	-0.234	SE	chr9:15325506:15325746:15324148:15324291:15326074:15326177	232	74	317	39	306	356
47387	ENSMUSG00000034566	Atp5h	chr11	-	47387	2,5,1,1,4	29,11,24,10,33	7,6,8,1,7	3,9,10,9,7	223	122	1.4065e-05	0.000298389	0.036,0.199,0.022,0.052,0.062	0.561,0.267,0.304,0.057,0.354	-0.234	SE	chr11:115419191:115419293:115418385:115418550:115419891:115419917	13	107	29	38	120	67
27040	ENSMUSG00000008435	Rdh13	chr7	-	27040	4,19,21,21,21	1,6,1,5,18	5,10,11,11,13	1,0,0,2,0	226	122	1.08176e-06	2.92539e-05	0.683,0.631,0.919,0.694,0.386	0.73,1.0,1.0,0.748,1.0	-0.233	SE	chr7:4434993:4435098:4431421:4431634:4442593:4442749	86	31	50	3	117	53
41943	ENSMUSG00000027806	Tsc22d2	chr3	+	41943	2,0,5,2,2	29,15,28,30,19	4,5,11,0,5	9,11,2,8,7	244	122	0.000168367	0.0028065	0.033,0.0,0.082,0.032,0.05	0.182,0.185,0.733,0.0,0.263	-0.233	SE	chr3:58437316:58437475:58428227:58428299:58459330:58459382	11	121	25	37	132	62
35456	ENSMUSG00000019978	Epb41l2	chr10	+	35456	230189201188256	36,27,40,46,46	303232347211315	9,4,5,3,6	244	122	0	0	0.762,0.778,0.715,0.671,0.736	0.944,0.967,0.972,0.972,0.963	-0.231	SE	chr10:25504136:25504259:25488950:25489093:25506174:25506273	1064	195	1408	27	1259	1435
39132	ENSMUSG00000041225	Arhgap12	chr18	-	39132	29,18,12,17,30	42,16,24,18,37	48,41,69,11,55	31,9,15,23,22	196	122	0.00228402	0.0281928	0.301,0.412,0.237,0.37,0.335	0.491,0.739,0.741,0.229,0.609	-0.231	SE	chr18:6057516:6057591:6052861:6052923:6061846:6061972	106	137	224	100	243	324
44423	ENSMUSG00000033543	Gtf2a2	chr9	+	44423	22,30,25,15,23	125,82,75,101,72	27,23,21,11,18	16,49,26,5,24	240	122	5.69244e-07	1.62002e-05	0.082,0.157,0.145,0.07,0.14	0.462,0.193,0.291,0.528,0.276	-0.231	SE	chr9:70017072:70017191:70016818:70016923:70022436:70022738	115	455	100	120	570	220
16164	ENSMUSG00000036180	Gatad2a	chr8	-	16164	730451612568704	176141100221230	471840683675628	26,54,38,25,37	196	122	0	0	0.721,0.666,0.792,0.615,0.656	0.919,0.906,0.918,0.944,0.914	-0.23	SE	chr8:69912163:69912238:69911676:69911869:69912922:69913224	3065	868	3297	180	3933	3477
20244	ENSMUSG00000021759	Plpp1	chr13	+	20244	32,25,21,34,20	35,39,29,15,16	67,49,32,31,40	14,20,17,13,13	244	122	4.45634e-05	0.000848737	0.314,0.243,0.266,0.531,0.385	0.705,0.551,0.485,0.544,0.606	-0.23	SE	chr13:112851402:112851554:112834858:112835013:112856745:112857026	132	134	219	77	266	296
14415	ENSMUSG00000023764	Sfi1	chr11	-	14415	18,31,4,21,29	9,7,3,3,0	30,42,36,28,21	0,2,1,5,1	244	122	0.00264202	0.0320336	0.5,0.689,0.4,0.778,1.0	1.0,0.913,0.947,0.737,0.913	-0.229	SE	chr11:3135282:3135542:3133071:3133207:3135653:3135830	103	22	157	9	125	166
46139	ENSMUSG00000035000	Dpp4	chr2	-	46139	105,88,63,85,108	21,20,13,16,13	1.03788e+15	6,3,1,10,8	206	122	0	0	0.748,0.723,0.742,0.759,0.831	0.99,0.994,0.998,0.978,0.983	-0.228	SE	chr2:62411214:62411299:62387064:62387160:62411785:62412231	449	83	4446	28	532	4474
2141	ENSMUSG00000001911	Nfix	chr8	-	2141	120154137172166	52,53,41,52,54	109144198185120	7,18,27,11,20	244	122	9.26259e-13	5.13938e-11	0.536,0.592,0.626,0.623,0.606	0.886,0.8,0.786,0.894,0.75	-0.227	SE	chr8:84723727:84723850:84721642:84721818:84726468:84726605	749	252	756	83	1001	839
19758	ENSMUSG00000090626	Tex9	chr9	-	19758	40,21,42,38,48	27,22,29,23,37	44,63,59,49,44	8,15,6,19,35	198	122	0.000512718	0.00756436	0.477,0.37,0.472,0.504,0.444	0.772,0.721,0.858,0.614,0.436	-0.227	SE	chr9:72482446:72482523:72480596:72480775:72484068:72484114	189	138	259	83	327	342
39945	ENSMUSG00000029505	Ep400	chr5	-	39945	23,11,16,9,29	6,0,7,3,3	18,21,41,6,19	3,0,0,0,0	244	122	4.64028e-07	1.3398e-05	0.657,1.0,0.533,0.6,0.829	0.75,1.0,1.0,1.0,1.0	-0.226	SE	chr5:110668549:110668724:110668062:110668190:110670874:110671096	88	19	105	3	107	108
25270	ENSMUSG00000040813	Tex264	chr9	-	25270	175113105107137	26,15,19,28,31	103191185167153	0,3,3,11,5	244	122	0	0	0.771,0.79,0.734,0.656,0.688	1.0,0.97,0.969,0.884,0.939	-0.225	SE	chr9:106681867:106682163:106673516:106673738:106684928:106684995	637	119	799	22	756	821
1499	ENSMUSG00000085385	Snhg17	chr2	-	1499	25,13,9,11,2	7,0,0,3,5	15,26,21,8,19	0,0,3,1,0	244	122	0.000164627	0.00232556	0.641,1.0,1.0,0.647,0.167	1.0,1.0,0.778,0.8,1.0	-0.225	RI	chr2:158359181:158360599:158359181:158359432:158360458:158360599	60	15	89	4	75	93
42656	ENSMUSG00000006705	Pknox1	chr17	+	42656	20,11,9,21,25	78,53,48,58,62	46,48,72,62,42	26,66,52,59,66	244	122	2.78239e-11	1.35772e-09	0.114,0.094,0.086,0.153,0.168	0.469,0.267,0.409,0.344,0.241	-0.223	SE	chr17:31581803:31582050:31564748:31564888:31583695:31583803	86	299	270	269	385	539
44065	ENSMUSG00000040785	Ttc3	chr16	+	44065	37,42,30,31,27	70,76,83,54,63	108,59,92,50,96	87,47,62,45,66	175	122	6.40599e-14	3.83895e-12	0.269,0.278,0.201,0.286,0.23	0.464,0.467,0.508,0.436,0.503	-0.223	SE	chr16:94387336:94387390:94385335:94385423:94388264:94388385	167	346	405	307	513	712
44071	ENSMUSG00000040785	Ttc3	chr16	+	44071	43,67,63,58,44	14,17,19,21,38	81,80,61,42,83	5,3,9,8,12	184	122	3.06784e-07	9.08943e-06	0.671,0.723,0.687,0.647,0.434	0.915,0.946,0.818,0.777,0.821	-0.223	SE	chr16:94393111:94393174:94370617:94370861:94403313:94403343	275	109	347	37	384	384
10799	ENSMUSG00000064289	Tank	chr2	+	10799	3,11,13,4,8	26,35,14,33,41	16,10,26,44,42	28,31,44,27,8	244	122	0.000433015	0.00651196	0.055,0.136,0.317,0.057,0.089	0.222,0.139,0.228,0.449,0.724	-0.222	SE	chr2:61593996:61594201:61593096:61593208:61613650:61613798	39	149	138	138	188	276
15622	ENSMUSG00000026311	Asb1	chr1	+	15622	16,2,9,24,35	1,1,3,3,2	34,34,72,17,48	2,0,0,1,0	244	122	0.000196631	0.00322321	0.889,0.5,0.6,0.8,0.897	0.895,1.0,1.0,0.895,1.0	-0.221	SE	chr1:91546927:91547230:91544150:91544297:91552053:91552439	86	10	205	3	96	208
12452	ENSMUSG00000046111	Cep295	chr9	-	12452	65,47,71,55,89	21,15,7,5,0	39,73,65,69,122	0,0,0,0,0	244	122	3.23075e-14	1.97794e-12	0.607,0.61,0.835,0.846,1.0	1.0,1.0,1.0,1.0,1.0	-0.22	SE	chr9:15323568:15323713:15317188:15323083:15324148:15324262	327	48	368	0	375	368
39891	ENSMUSG00000021870	Slmap	chr14	-	39891	28,8,47,27,47	14,4,17,8,20	41,9,37,41,31	4,0,4,5,11	172	122	0.000361272	0.0055423	0.587,0.587,0.662,0.705,0.625	0.879,1.0,0.868,0.853,0.667	-0.22	SE	chr14:26459903:26459954:26459409:26459460:26460041:26460185	157	63	159	24	220	183
11520	ENSMUSG00000078812	Eif5a	chr11	-	11520	166174153165201	28,21,38,30,27	56,132,130,111,95	0,0,0,0,3	215	122	0	0	0.771,0.825,0.696,0.757,0.809	1.0,1.0,1.0,1.0,0.947	-0.218	SE	chr11:69920340:69920434:69917916:69918021:69921162:69921386	859	144	524	3	1003	527
17613	ENSMUSG00000042605	Atxn2	chr5	+	17613	96,87,62,81,76	48,27,42,51,56	71,105,100,74,115	21,16,34,10,25	244	122	5.82845e-06	0.000135141	0.5,0.617,0.425,0.443,0.404	0.628,0.766,0.595,0.787,0.697	-0.217	SE	chr5:121813384:121813553:121811384:121811612:121814337:121814720	402	224	465	106	626	571
15212	ENSMUSG00000000827	Tpd52l2	chr2	+	15212	1.08793e+15	368263282274367	9.79117e+17	79,94,109,109,111	181	122	0	0	0.666,0.704,0.646,0.673,0.637	0.893,0.893,0.874,0.886,0.855	-0.215	SE	chr2:181502875:181502935:181501904:181502053:181508165:181508267	4569	1554	5493	502	6123	5995
44651	ENSMUSG00000015605	Srf	chr17	-	44651	236114146189159	43,34,27,31,59	128193202204127	3,15,23,2,9	244	122	6.91935e-12	3.60716e-10	0.733,0.626,0.73,0.753,0.574	0.955,0.865,0.815,0.981,0.876	-0.215	SE	chr17:46549844:46550036:46549435:46549512:46550900:46551020	844	194	854	52	1038	906
31475	ENSMUSG00000033767	Tmem131l	chr3	-	31475	373250265364416	134,74,94,104,101	446343397308473	36,49,49,23,38	244	122	0	0	0.582,0.628,0.585,0.636,0.673	0.861,0.778,0.802,0.87,0.862	-0.214	SE	chr3:83909151:83909334:83906346:83906425:83910368:83910508	1668	507	1967	195	2175	2162
36084	ENSMUSG00000062861	Zfp28	chr7	+	36084	9,6,0,0,1	25,24,8,9,8	2,15,16,11,7	17,7,9,22,21	241	122	0.00199717	0.0250971	0.154,0.112,0.0,0.0,0.06	0.056,0.52,0.474,0.202,0.144	-0.214	SE	chr7:6392593:6392713:6392181:6392296:6393366:6393589	16	74	51	76	90	127
39102	ENSMUSG00000033557	Fam20b	chr1	-	39102	19,13,19,15,21	10,5,7,8,11	18,18,32,23,32	4,2,7,7,2	214	122	0.00125339	0.0166582	0.52,0.597,0.607,0.517,0.521	0.72,0.837,0.723,0.652,0.901	-0.214	SE	chr1:156716887:156716980:156705667:156706167:156718865:156719072	87	41	123	22	128	145
2682	ENSMUSG00000028677	Rnf220	chr4	-	2682	555437345485476	213220201234293	531755703607563	92130139150100	199	122	0	0	0.615,0.549,0.513,0.56,0.499	0.78,0.781,0.756,0.713,0.775	-0.214	A5SS	chr4:117285850:117285972:117285928:117285972:117285378:117285511	2298	1161	3159	611	3459	3770
766	ENSMUSG00000047090	Tmem198b	chr10	-	766	0,6,0,3,1	33,16,9,26,42	7,3,11,15,7	5,23,17,10,20	244	122	7.13858e-08	3.5816e-06	0.0,0.158,0.0,0.055,0.012	0.412,0.061,0.244,0.429,0.149	-0.214	RI	chr10:128801350:128802517:128801350:128801511:128801935:128802517	10	126	43	75	136	118
31365	ENSMUSG00000028708	Mknk1	chr4	+	31365	94,112,103,87,153	44,14,23,27,33	94128131127134	2,2,4,9,5	165	122	0	0	0.612,0.855,0.768,0.704,0.774	0.972,0.979,0.96,0.913,0.952	-0.213	SE	chr4:115876580:115876624:115875380:115875545:115877949:115879250	549	141	614	22	690	636
2722	ENSMUSG00000045078	Rnf216	chr5	-	2722	83,47,47,27,64	173134140106167	104,84,162,93,149	103,104,117,70,114	244	122	0	0	0.193,0.149,0.144,0.113,0.161	0.335,0.288,0.409,0.399,0.395	-0.213	A3SS	chr5:143090119:143090929:143090119:143090758:143092994:143093125	268	720	592	508	988	1100
1951	ENSMUSG00000025316	Banp	chr8	+	1951	340256286230287	128,61,75,74,95	342587478416364	23,56,59,37,45	244	122	0	0	0.57,0.677,0.656,0.608,0.602	0.881,0.84,0.802,0.849,0.802	-0.212	SE	chr8:122020518:122020644:122007752:122007791:122024002:122024146	1399	433	2187	220	1832	2407
15363	ENSMUSG00000062995	Ica1	chr6	-	15363	56,41,38,47,65	20,20,22,16,20	53,82,69,36,54	2,7,4,10,15	184	122	6.76974e-06	0.000154746	0.65,0.576,0.534,0.661,0.683	0.946,0.886,0.92,0.705,0.705	-0.212	SE	chr6:8653629:8653692:8653496:8653535:8656361:8656408	247	98	294	38	345	332
24860	ENSMUSG00000037849	Ifi206	chr1	-	24860	92,120,79,124,133	37,12,19,29,29	131190207233167	4,5,7,21,13	228	122	8.04612e-12	4.16718e-10	0.571,0.843,0.69,0.696,0.71	0.946,0.953,0.941,0.856,0.873	-0.212	SE	chr1:173485528:173485635:173480370:173482056:173486607:173486892	548	126	928	50	674	978
23133	ENSMUSG00000033488	Cryzl2	chr1	+	23133	6,18,13,12,19	6,19,4,12,14	40,64,29,47,47	16,24,12,13,8	244	122	0.0017	0.021819	0.333,0.321,0.619,0.333,0.404	0.556,0.571,0.547,0.644,0.746	-0.211	SE	chr1:157470615:157470797:157467165:157467247:157488442:157489060	68	55	227	73	123	300
24242	ENSMUSG00000017718	Afmid	chr11	+	24242	16,21,15,12,7	6,0,7,8,8	18,3,6,5,3	0,3,0,0,1	212	122	0.000279044	0.00441046	0.605,1.0,0.552,0.463,0.335	1.0,0.365,1.0,1.0,0.633	-0.209	SE	chr11:117828078:117828169:117825923:117826006:117832344:117832449	71	29	35	4	100	39
6454	ENSMUSG00000036817	Sun1	chr5	+	6454	20,14,23,18,40	5,3,1,7,7	5,10,4,5,5	0,1,0,0,0	187	122	1.49998e-07	4.65627e-06	0.723,0.753,0.938,0.627,0.788	1.0,0.867,1.0,1.0,1.0	-0.208	SE	chr5:139230772:139230838:139226705:139226885:139233470:139233569	115	23	29	1	138	30
35985	ENSMUSG00000035620	Ric8b	chr10	+	35985	11,7,12,7,15	2,0,7,3,14	17,56,9,33,25	6,0,2,3,0	244	122	0.00279148	0.0335893	0.733,1.0,0.462,0.538,0.349	0.586,1.0,0.692,0.846,1.0	-0.208	SE	chr10:85009451:85009627:85008715:85008793:85015075:85018337	52	26	140	11	78	151
37128	ENSMUSG00000026504	Sdccag8	chr1	+	37128	47,64,72,77,71	23,8,35,0,24	85,108,107,95,105	8,15,1,9,0	244	122	0.00065514	0.00942375	0.505,0.8,0.507,1.0,0.597	0.842,0.783,0.982,0.841,1.0	-0.208	SE	chr1:176824751:176824904:176814659:176815055:176831056:176831182	331	90	500	33	421	533
43385	ENSMUSG00000012114	Med15	chr16	-	43385	174137135138163	41,33,40,24,61	193281288179235	27,17,19,11,14	241	122	2.29816e-14	1.42457e-12	0.682,0.678,0.631,0.744,0.575	0.783,0.893,0.885,0.892,0.895	-0.208	SE	chr16:17663376:17663496:17655677:17655805:17671544:17671673	747	199	1176	88	946	1264
5239	ENSMUSG00000063889	Crem	chr18	-	5239	8,7,3,10,4	14,14,10,6,17	6,9,4,10,14	5,6,4,5,9	203	122	0.0041947	0.0477341	0.256,0.231,0.153,0.5,0.124	0.419,0.474,0.375,0.546,0.483	-0.207	SE	chr18:3276693:3276775:3273421:3273578:3280948:3281078	32	61	43	29	93	72
10974	ENSMUSG00000086533	Mypopos	chr7	-	10974	0,2,18,1,15	16,37,28,35,30	18,58,21,22,14	19,33,39,29,22	244	122	4.96737e-07	1.42286e-05	0.0,0.026,0.243,0.014,0.2	0.321,0.468,0.212,0.275,0.241	-0.207	SE	chr7:18993552:18993752:18993233:18993341:18997389:18997470	36	146	133	142	182	275
12503	ENSMUSG00000049871	Nlrc3	chr16	-	12503	24,14,23,31,9	23,32,43,61,61	41,43,78,80,31	29,38,40,49,33	244	122	1.26275e-07	3.97902e-06	0.343,0.179,0.211,0.203,0.069	0.414,0.361,0.494,0.449,0.32	-0.207	SE	chr16:3965399:3965639:3959390:3959474:3976328:3976632	101	220	273	189	321	462
27238	ENSMUSG00000040430	Pitpnc1	chr11	-	27238	30,57,31,40,58	4,16,10,25,14	22,35,46,31,49	9,0,0,7,1	240	122	0.000371927	0.00567721	0.792,0.644,0.612,0.449,0.678	0.554,1.0,1.0,0.692,0.961	-0.206	SE	chr11:107216677:107216796:107207891:107212658:107226230:107226294	216	69	183	17	285	200
42400	ENSMUSG00000043384	Gprasp1	chrX	+	42400	37,17,21,11,20	43,27,24,25,28	22,34,23,46,27	14,10,19,28,22	202	122	0.000280604	0.00443157	0.342,0.276,0.346,0.21,0.301	0.487,0.673,0.422,0.498,0.426	-0.206	SE	chrX:135743441:135743522:135742732:135742978:135744498:135744575	106	147	152	93	253	245
39880	ENSMUSG00000021870	Slmap	chr14	-	39880	227,73,213,191,220	25,27,21,23,23	154110156168194	2,0,0,7,1	244	122	0	0	0.819,0.575,0.835,0.806,0.827	0.975,1.0,1.0,0.923,0.99	-0.205	SE	chr14:26429787:26429910:26428241:26428316:26438678:26438738	924	119	782	10	1043	792
22018	ENSMUSG00000024978	Gpam	chr19	-	22018	220120128151185	61,26,55,58,49	381244273291350	36,33,34,10,13	180	122	0	0	0.71,0.758,0.612,0.638,0.719	0.878,0.834,0.845,0.952,0.948	-0.204	SE	chr19:55072711:55072770:55069733:55071046:55074570:55074760	804	249	1539	126	1053	1665
37132	ENSMUSG00000026504	Sdccag8	chr1	+	37132	75,62,78,68,64	23,8,35,0,24	111,140,104,114,93	8,15,1,9,0	235	122	8.50724e-05	0.00151481	0.629,0.801,0.536,1.0,0.581	0.878,0.829,0.982,0.868,1.0	-0.202	SE	chr1:176828869:176828983:176814659:176815055:176831056:176831182	347	90	562	33	437	595
13880	ENSMUSG00000038909	Kat7	chr11	-	13880	718506581624655	359225287298276	664658828702874	135160122130148	211	122	0	0	0.536,0.565,0.539,0.548,0.578	0.74,0.704,0.797,0.757,0.773	-0.201	SE	chr11:95291519:95291609:95289771:95289870:95294562:95294645	3084	1445	3726	695	4529	4421
18408	ENSMUSG00000098090	2700099C18Rik	chr17	+	18408	122,133,73,94,118	155135102110115	162257150192156	49,93,120,110,96	228	122	1.05899e-07	3.37718e-06	0.296,0.345,0.277,0.314,0.354	0.639,0.597,0.401,0.483,0.465	-0.2	SE	chr17:94761497:94761604:94756433:94756523:94762461:94762620	540	617	917	468	1157	1385
25846	ENSMUSG00000024589	Nedd4l	chr18	+	25846	107,87,81,97,101	24,15,12,0,13	147153148132151	0,0,0,0,0	244	122	0	0	0.69,0.744,0.771,1.0,0.795	1.0,1.0,1.0,1.0,1.0	-0.2	SE	chr18:65174044:65174242:65165571:65165646:65178918:65178996	473	64	731	0	537	731
41798	ENSMUSG00000042632	Pla2g6	chr15	-	41798	7,2,2,7,8	8,11,4,11,15	15,37,24,22,7	9,15,15,14,20	244	122	0.00294279	0.0351222	0.304,0.083,0.2,0.241,0.211	0.455,0.552,0.444,0.44,0.149	-0.2	SE	chr15:79304304:79304469:79302618:79302697:79305702:79305715	26	49	105	73	75	178
11818	ENSMUSG00000030180	Kdm5a	chr6	+	11818	3,1,1,0,1	16,8,16,13,15	6,8,13,5,0	18,10,8,9,23	203	122	9.86301e-06	0.000217502	0.101,0.07,0.036,0.0,0.039	0.167,0.325,0.494,0.25,0.0	-0.198	SE	chr6:120438443:120438525:120431812:120432223:120438986:120439711	6	68	32	68	74	100
19697	ENSMUSG00000079845	Xlr4a	chrX	-	19697	244144157238174	22,32,32,45,22	166334193196243	0,8,2,5,6	220	122	0	0	0.86,0.714,0.731,0.746,0.814	1.0,0.959,0.982,0.956,0.957	-0.198	SE	chrX:73076732:73076831:73074834:73074930:73078024:73078124	957	153	1132	21	1110	1153
44402	ENSMUSG00000032217	Rnf111	chr9	-	44402	15,13,13,20,28	28,9,21,16,38	25,23,46,34,21	14,7,26,14,19	184	122	0.00126909	0.016816	0.262,0.489,0.291,0.453,0.328	0.542,0.685,0.54,0.617,0.423	-0.197	SE	chr9:70502939:70503002:70475775:70476668:70503458:70503725	89	112	149	80	201	229
21598	ENSMUSG00000025871	4833439L19Rik	chr13	-	21598	242216193235243	110,69,36,80,75	222335290249276	22,37,32,33,22	209	122	1.27676e-14	8.13025e-13	0.562,0.646,0.758,0.632,0.654	0.855,0.841,0.841,0.815,0.88	-0.196	SE	chr13:54564184:54564272:54561570:54561871:54565181:54565356	1129	370	1372	146	1499	1518
25125	ENSMUSG00000083012	Fam220a	chr5	+	25125	17,17,8,19,9	36,26,24,47,33	18,28,29,24,27	23,38,21,18,14	244	122	1.3684e-05	0.000291868	0.191,0.246,0.143,0.168,0.12	0.281,0.269,0.408,0.4,0.491	-0.196	SE	chr5:143551408:143551541:143548705:143549134:143562756:143564525	70	166	126	114	236	240
5507	ENSMUSG00000030881	Arfip2	chr7	-	5507	15,32,10,16,8	0,2,2,4,2	3,10,7,13,13	0,0,0,0,0	217	122	9.03433e-05	0.00223699	1.0,0.9,0.738,0.692,0.692	1.0,1.0,1.0,1.0,1.0	-0.196	A3SS	chr7:105639008:105639189:105639008:105639093:105639324:105639465	81	10	46	0	91	46
46029	ENSMUSG00000033255	Gm5134	chr10	+	46029	16,18,3,6,20	6,0,0,2,3	28,58,24,26,56	0,1,0,0,0	224	122	1.31832e-05	0.000282248	0.592,1.0,1.0,0.62,0.784	1.0,0.969,1.0,1.0,1.0	-0.195	SE	chr10:76005989:76006092:76004694:76004910:76008501:76009591	63	11	192	1	74	193
1471	ENSMUSG00000015790	Surf1	chr2	-	1471	20,19,18,28,50	8,9,9,13,13	58,60,64,47,58	9,14,11,7,9	244	122	0.000723279	0.00772257	0.556,0.514,0.5,0.519,0.658	0.763,0.682,0.744,0.77,0.763	-0.195	RI	chr2:26915595:26916006:26915595:26915749:26915954:26916006	135	52	287	50	187	337
12451	ENSMUSG00000046111	Cep295	chr9	-	12451	79,54,86,69,92	21,15,7,5,0	44,91,76,90,138	0,0,0,0,0	244	122	1.76525e-14	1.11692e-12	0.653,0.643,0.86,0.873,1.0	1.0,1.0,1.0,1.0,1.0	-0.194	SE	chr9:15323568:15323710:15322499:15323083:15324148:15324291	380	48	439	0	428	439
15326	ENSMUSG00000020594	Pum2	chr12	+	15326	56,43,37,54,91	86,59,70,92,113	34,86,74,68,83	40,41,40,46,43	244	122	1.01749e-07	3.26586e-06	0.246,0.267,0.209,0.227,0.287	0.298,0.512,0.481,0.425,0.491	-0.194	SE	chr12:8733272:8733509:8728855:8729149:8743760:8744028	281	420	345	210	701	555
40147	ENSMUSG00000039671	Zmynd8	chr2	-	40147	110,68,91,95,106	36,43,45,52,67	139152137114143	45,22,32,19,36	205	122	2.59738e-07	7.81816e-06	0.645,0.485,0.546,0.521,0.485	0.648,0.804,0.718,0.781,0.703	-0.194	SE	chr2:165787163:165787247:165784151:165785738:165791904:165791971	470	243	685	154	713	839
40730	ENSMUSG00000037773	Pced1a	chr2	-	40730	24,15,23,12,12	0,3,2,0,7	33,49,60,25,36	0,0,0,0,0	244	122	5.6742e-06	0.000131873	1.0,0.714,0.852,1.0,0.462	1.0,1.0,1.0,1.0,1.0	-0.194	SE	chr2:130423411:130423552:130422812:130422892:130424492:130424687	86	12	203	0	98	203
12875	ENSMUSG00000032411	Tfdp2	chr9	+	12875	2,8,0,2,7	28,24,13,24,35	7,18,11,13,12	31,10,24,33,37	160	122	0.000492986	0.0073113	0.052,0.203,0.0,0.06,0.132	0.147,0.579,0.259,0.231,0.198	-0.193	SE	chr9:96247049:96247088:96223093:96223198:96273838:96273942	19	124	61	135	143	196
4005	ENSMUSG00000060550	H2-Q7	chr17	+	4005	419298205175184	100,61,59,41,49	577458726493440	34,39,50,55,30	238	122	0	0	0.682,0.715,0.64,0.686,0.658	0.897,0.858,0.882,0.821,0.883	-0.192	SE	chr17:35442677:35442794:35442266:35442551:35442966:35442999	1281	310	2694	208	1591	2902
4398	ENSMUSG00000014402	Tsg101	chr7	-	4398	1.0851e+16	141169140150106	1.06315e+19	11,4,7,4,9	213	122	0	0	0.815,0.779,0.797,0.766,0.835	0.982,0.995,0.991,0.995,0.987	-0.192	SE	chr7:46901026:46901118:46892357:46892560:46907050:46907177	4875	706	6262	35	5581	6297
13494	ENSMUSG00000042213	Zfand4	chr6	+	13494	31,25,36,38,36	24,8,16,40,29	46,40,37,46,62	7,16,6,21,21	244	122	0.00273447	0.0330134	0.392,0.61,0.529,0.322,0.383	0.767,0.556,0.755,0.523,0.596	-0.192	SE	chr6:116287981:116288168:116273578:116273872:116305616:116305761	166	117	231	71	283	302
26707	ENSMUSG00000022139	Mbnl2	chr14	+	26707	28,18,7,19,23	144,85,80,121,85	84,106,97,95,63	132120162105112	216	122	0	0	0.099,0.107,0.047,0.081,0.133	0.264,0.333,0.253,0.338,0.241	-0.192	SE	chr14:120404637:120404732:120396450:120396604:120428934:120429626	95	515	445	631	610	1076
28147	ENSMUSG00000087177	E130307A14Rik	chr10	-	28147	28,12,18,31,21	4,2,5,2,2	11,47,8,22,14	0,4,0,0,0	244	122	3.0158e-05	0.000601826	0.778,0.75,0.643,0.886,0.84	1.0,0.855,1.0,1.0,1.0	-0.192	SE	chr10:39640379:39640511:39632949:39633016:39681472:39681549	110	15	102	4	125	106
29612	ENSMUSG00000097121	D130020L05Rik	chr12	+	29612	26,31,25,41,25	17,0,1,2,5	34,25,25,18,24	1,0,0,0,0	244	122	1.62357e-07	5.02419e-06	0.433,1.0,0.926,0.911,0.714	0.944,1.0,1.0,1.0,1.0	-0.192	SE	chr12:101084283:101084499:101083677:101084025:101086187:101086352	148	25	126	1	173	127
3256	ENSMUSG00000062729	Ppox	chr1	-	3256	8,9,5,8,8	3,0,5,0,1	41,14,12,14,16	0,0,0,0,0	140	122	0.000988004	0.0155485	0.699,1.0,0.466,1.0,0.875	1.0,1.0,1.0,1.0,1.0	-0.192	A3SS	chr1:171279429:171279593:171279429:171279574:171280387:171280522	38	9	97	0	47	97
2151	ENSMUSG00000022724	Riox2	chr16	+	2151	4,2,8,5,6	31,36,22,26,14	6,14,0,12,6	8,10,10,11,6	198	122	0.000644419	0.00929312	0.074,0.033,0.183,0.106,0.209	0.316,0.463,0.0,0.402,0.381	-0.191	SE	chr16:59489489:59489566:59487427:59487599:59491204:59491668	25	129	38	45	154	83
14425	ENSMUSG00000023764	Sfi1	chr11	-	14425	14,12,21,15,10	5,5,1,0,9	14,22,30,14,14	3,0,2,1,0	188	122	0.000700811	0.00998297	0.645,0.609,0.932,1.0,0.419	0.752,1.0,0.907,0.901,1.0	-0.191	SE	chr11:3153431:3153498:3146161:3146292:3164556:3164713	72	20	94	6	92	100
2859	ENSMUSG00000055725	Paqr3	chr5	-	2859	9,13,14,20,19	1,5,6,2,0	15,12,17,6,11	0,0,1,0,0	184	122	5.52775e-07	2.5908e-05	0.856,0.633,0.607,0.869,1.0	1.0,1.0,0.919,1.0,1.0	-0.191	A3SS	chr5:97099545:97099743:97099545:97099680:97103359:97103515	75	14	61	1	89	62
125	ENSMUSG00000072501	Phf20l1	chr15	+	125	189119120183152	81,120,83,99,95	204172240195214	68,44,70,64,50	211	122	1.39376e-08	5.06813e-07	0.574,0.364,0.455,0.517,0.481	0.634,0.693,0.665,0.638,0.712	-0.19	SE	chr15:66597664:66597754:66597358:66597447:66604026:66604240	763	478	1025	296	1241	1321
23866	ENSMUSG00000005417	Mprip	chr11	+	23866	768492413671678	139,97,81,84,134	770638842684875	24,35,30,20,21	229	122	0	0	0.746,0.73,0.731,0.81,0.729	0.945,0.907,0.937,0.948,0.957	-0.19	SE	chr11:59741990:59742098:59740848:59741261:59743770:59743827	3022	535	3809	130	3557	3939
2238	ENSMUSG00000020898	Ctc1	chr11	+	2238	32,40,32,34,40	17,28,22,10,10	39,26,48,40,46	1,9,9,13,10	244	122	0.00558073	0.0383922	0.485,0.417,0.421,0.63,0.667	0.951,0.591,0.727,0.606,0.697	-0.19	RI	chr11:69021029:69022614:69021029:69021193:69022392:69022614	178	87	199	42	265	241
552	ENSMUSG00000005078	Jkamp	chr12	+	552	64,66,19,37,61	58,38,29,24,22	52,79,89,76,65	25,21,43,18,11	139	122	0.000942041	0.0149549	0.492,0.604,0.365,0.575,0.709	0.646,0.768,0.645,0.787,0.838	-0.188	A3SS	chr12:72089314:72089406:72089332:72089406:72085856:72086183	247	171	361	118	418	479
14410	ENSMUSG00000023764	Sfi1	chr11	-	14410	21,14,4,5,19	7,0,0,1,4	17,23,19,16,10	0,0,0,0,0	226	122	1.52943e-06	3.99708e-05	0.618,1.0,1.0,0.73,0.719	1.0,1.0,1.0,1.0,1.0	-0.187	SE	chr11:3134625:3134730:3133071:3133207:3135282:3135542	63	12	85	0	75	85
17317	ENSMUSG00000000244	Tspan32	chr7	+	17317	26,20,23,12,13	0,0,0,6,6	11,6,1,8,13	0,0,0,0,0	223	122	7.0149e-05	0.00127366	1.0,1.0,1.0,0.522,0.542	1.0,1.0,1.0,1.0,1.0	-0.187	SE	chr7:143014958:143015060:143006907:143007005:143017578:143017673	94	12	39	0	106	39
42634	ENSMUSG00000055897	Ppp4r1l-ps	chr2	-	42634	19,19,27,32,22	21,8,32,22,22	37,56,47,51,37	14,18,29,7,24	219	122	0.00402668	0.0461543	0.335,0.57,0.32,0.448,0.358	0.596,0.634,0.474,0.802,0.462	-0.187	SE	chr2:173599589:173599687:173594975:173597187:173608732:173608879	119	105	228	92	224	320
449	ENSMUSG00000029267	Mtf2	chr5	+	449	30,39,28,63,51	19,0,7,5,11	58,65,70,51,41	2,5,0,0,5	244	122	0.000216238	0.00386627	0.441,1.0,0.667,0.863,0.699	0.935,0.867,1.0,1.0,0.804	-0.187	A5SS	chr5:108069161:108069523:108069161:108069363:108078865:108078974	211	42	285	12	253	297
15669	ENSMUSG00000029165	Agbl5	chr5	+	15669	73,88,61,97,98	8,10,13,14,15	70,80,63,68,71	0,2,3,2,0	244	122	8.89311e-12	4.57597e-10	0.82,0.815,0.701,0.776,0.766	1.0,0.952,0.913,0.944,1.0	-0.186	SE	chr5:30905630:30905761:30905017:30905155:30906115:30906666	417	60	352	7	477	359
15844	ENSMUSG00000025372	Baiap2	chr11	+	15844	4,1,1,6,9	53,36,59,37,55	9,10,18,18,14	19,39,36,43,22	169	122	2.56383e-10	1.14284e-08	0.052,0.02,0.012,0.105,0.106	0.255,0.156,0.265,0.232,0.315	-0.186	SE	chr11:120003037:120003085:120000551:120000586:120006358:120006782	21	240	69	159	261	228
2809	ENSMUSG00000043592	Unc5cl	chr17	+	2809	6,24,13,21,37	4,4,1,3,2	1,4,7,1,6	0,0,0,0,0	153	122	1.47853e-06	6.12732e-05	0.545,0.827,0.912,0.848,0.937	1.0,1.0,1.0,1.0,1.0	-0.186	A3SS	chr17:48464441:48464542:48464473:48464542:48463576:48463644	101	14	19	0	115	19
15943	ENSMUSG00000032594	Ip6k1	chr9	+	15943	20,13,4,32,12	11,1,3,2,0	17,8,28,17,29	0,1,1,0,1	189	122	1.43167e-05	0.000303079	0.54,0.894,0.463,0.912,1.0	1.0,0.838,0.948,1.0,0.949	-0.185	SE	chr9:108045245:108045313:108045006:108045022:108045462:108046143	81	17	99	3	98	102
46188	ENSMUSG00000040407	Akap9	chr5	+	46188	137127167126152	23,40,25,48,37	216270251256184	13,9,15,14,13	175	122	0	0	0.806,0.689,0.823,0.647,0.741	0.921,0.954,0.921,0.927,0.908	-0.185	SE	chr5:3954396:3954450:3951689:3951734:3954791:3954962	709	173	1177	64	882	1241
18222	ENSMUSG00000059149	Mfsd4a	chr1	-	18222	31,12,18,44,52	4,5,0,14,10	32,27,28,55,24	2,0,0,3,3	244	122	0.000160753	0.00268975	0.795,0.545,1.0,0.611,0.722	0.889,1.0,1.0,0.902,0.8	-0.184	SE	chr1:132059159:132059358:132057715:132057967:132067662:132067826	157	33	166	8	190	174
43395	ENSMUSG00000012114	Med15	chr16	-	43395	18,25,8,31,30	5,1,3,1,0	13,19,24,15,14	0,0,0,0,0	244	122	0.00036928	0.00564333	0.643,0.926,0.571,0.939,1.0	1.0,1.0,1.0,1.0,1.0	-0.184	SE	chr16:17674404:17674658:17655677:17655805:17683158:17683188	112	10	85	0	122	85
34593	ENSMUSG00000005102	Eif2ak4	chr2	+	34593	25,12,10,19,33	3,1,3,0,9	21,29,46,6,28	0,2,0,0,0	234	122	2.64426e-07	7.94721e-06	0.813,0.862,0.635,1.0,0.657	1.0,0.883,1.0,1.0,1.0	-0.183	SE	chr2:118400534:118400647:118388617:118388852:118412934:118413083	99	16	130	2	115	132
37237	ENSMUSG00000050379	Sept6	chrX	-	37237	444441386424436	269170171198176	259326252289288	58,79,59,28,41	166	122	9.54792e-15	6.13914e-13	0.548,0.656,0.624,0.611,0.645	0.766,0.752,0.758,0.884,0.838	-0.183	SE	chrX:36920368:36920413:36911325:36913254:36922839:36923030	2131	984	1414	265	3115	1679
37821	ENSMUSG00000097290	1300002E11Rik	chr16	+	37821	32,15,0,8,8	61,53,40,48,44	24,20,37,18,16	25,49,30,31,18	244	122	5.25433e-07	1.49964e-05	0.208,0.124,0.0,0.077,0.083	0.324,0.169,0.381,0.225,0.308	-0.183	SE	chr16:21806970:21807119:21801280:21801356:21808677:21809040	63	246	115	153	309	268
35719	ENSMUSG00000001017	Chtop	chr3	-	35719	1.58715e+19	315268203277255	1.56916e+19	76,83,89,57,58	244	122	0	0	0.716,0.743,0.759,0.721,0.754	0.912,0.906,0.908,0.94,0.938	-0.182	SE	chr3:90502115:90502253:90498955:90500107:90503095:90503282	7404	1318	8467	363	8722	8830
40782	ENSMUSG00000028832	Stmn1	chr4	+	40782	18,12,9,46,81	58,0,0,6,0	61,86,67,48,79	6,0,0,0,0	244	122	0.00370898	0.0430116	0.134,1.0,1.0,0.793,1.0	0.836,1.0,1.0,1.0,1.0	-0.182	SE	chr4:134470020:134470175:134468405:134468429:134472803:134472925	166	64	341	6	230	347
12454	ENSMUSG00000046111	Cep295	chr9	-	12454	45,43,41,49,63	26,11,17,5,4	48,63,47,58,98	1,5,3,11,8	244	122	0.00285353	0.0342528	0.464,0.662,0.547,0.831,0.887	0.96,0.863,0.887,0.725,0.86	-0.181	SE	chr9:15330504:15330648:15327795:15327951:15330753:15330910	241	63	314	28	304	342
23890	ENSMUSG00000037339	Fam53a	chr5	-	23890	19,7,9,14,17	0,0,5,0,10	5,7,1,6,2	0,0,0,0,0	176	122	1.48095e-05	0.000312512	1.0,1.0,0.555,1.0,0.541	1.0,1.0,1.0,1.0,1.0	-0.181	SE	chr5:33610431:33610486:33600346:33600880:33628852:33628912	66	15	21	0	81	21
31517	ENSMUSG00000026319	2310035C23Rik	chr1	+	31517	13,5,11,14,11	57,32,79,38,61	28,5,22,10,31	17,19,41,17,38	204	122	3.62069e-06	8.74253e-05	0.12,0.085,0.077,0.181,0.097	0.496,0.136,0.243,0.26,0.328	-0.181	SE	chr1:105741012:105741095:105740434:105740517:105741296:105741360	54	267	96	132	321	228
44307	ENSMUSG00000107283	Mpv17	chr5	-	44307	87,69,80,68,73	13,27,10,29,26	57,94,69,64,69	9,11,2,1,3	160	122	1.33384e-07	4.1831e-06	0.836,0.661,0.859,0.641,0.682	0.828,0.867,0.963,0.98,0.946	-0.181	SE	chr5:31145239:31145278:31144699:31144752:31145494:31145590	377	105	353	26	482	379
1211	ENSMUSG00000022546	Gpt	chr15	+	1211	33,15,13,21,19	2,0,4,7,1	20,23,9,14,11	0,1,0,0,0	244	122	7.93252e-07	3.09238e-05	0.892,1.0,0.619,0.6,0.905	1.0,0.92,1.0,1.0,1.0	-0.181	A5SS	chr15:76698714:76699151:76698714:76698889:76699235:76699348	101	14	77	1	115	78
3449	ENSMUSG00000038671	Arfrp1	chr2	-	3449	554433428447524	177130104102130	391475616431479	32,54,69,41,46	244	122	0	0	0.61,0.625,0.673,0.687,0.668	0.859,0.815,0.817,0.84,0.839	-0.181	A5SS	chr2:181361000:181361472:181361390:181361472:181359638:181359739	2386	643	2392	242	3029	2634
12500	ENSMUSG00000049871	Nlrc3	chr16	-	12500	6,19,13,7,12	23,32,43,61,61	37,25,31,43,18	29,38,40,49,33	208	122	1.4959e-07	4.64726e-06	0.133,0.258,0.151,0.063,0.103	0.428,0.278,0.313,0.34,0.242	-0.179	SE	chr16:3962453:3962540:3959390:3959474:3976328:3976632	57	220	154	189	277	343
14805	ENSMUSG00000032966	Fkbp1a	chr2	+	14805	7,10,0,6,7	49,41,10,42,57	7,3,8,3,18	14,13,22,17,6	212	122	0.00340245	0.0398412	0.076,0.123,0.0,0.076,0.066	0.223,0.117,0.173,0.092,0.633	-0.179	SE	chr2:151545424:151545515:151544012:151544140:151557385:151557498	30	199	39	72	229	111
23134	ENSMUSG00000033488	Cryzl2	chr1	+	23134	17,18,16,20,17	2,2,1,0,6	42,67,58,48,67	0,0,0,0,0	244	122	1.04897e-05	0.000229409	0.81,0.818,0.889,1.0,0.586	1.0,1.0,1.0,1.0,1.0	-0.179	SE	chr1:157472187:157472416:157465711:157465821:157488442:157489060	88	11	282	0	99	282
32821	ENSMUSG00000007035	Msh5	chr17	-	32821	116,78,89,75,117	54,26,37,36,24	64,88,76,78,110	12,11,9,11,17	184	122	3.44485e-07	1.01383e-05	0.588,0.665,0.615,0.58,0.764	0.78,0.841,0.848,0.825,0.811	-0.179	SE	chr17:35045113:35045176:35044316:35044438:35045293:35045374	475	177	416	60	652	476
126	ENSMUSG00000072501	Phf20l1	chr15	+	126	282159119264211	81,120,83,99,95	257233279294279	68,44,70,64,50	199	122	7.63591e-07	2.13482e-05	0.681,0.448,0.468,0.62,0.577	0.699,0.765,0.71,0.738,0.774	-0.178	SE	chr15:66597676:66597754:66597358:66597447:66604026:66604240	1035	478	1342	296	1513	1638
32586	ENSMUSG00000036606	Plxnb2	chr15	-	32586	32,17,23,41,51	0,6,3,6,11	17,11,18,14,14	0,0,0,0,0	171	122	3.11509e-09	1.23705e-07	1.0,0.669,0.845,0.83,0.768	1.0,1.0,1.0,1.0,1.0	-0.178	SE	chr15:89171066:89171116:89170568:89170617:89180664:89180788	164	26	74	0	190	74
42840	ENSMUSG00000069094	Pde7a	chr3	-	42840	48,37,27,47,34	25,8,8,16,21	50,44,56,35,68	14,9,2,7,6	185	122	0.000290077	0.00456846	0.559,0.753,0.69,0.66,0.516	0.702,0.763,0.949,0.767,0.882	-0.177	SE	chr3:19241145:19241209:19236443:19236539:19256777:19256861	193	78	253	38	271	291
26210	ENSMUSG00000030924	Rexo5	chr7	+	26210	15,30,39,24,26	5,7,0,5,7	69,55,86,91,58	0,3,10,0,7	244	122	0.00250664	0.0305416	0.6,0.682,1.0,0.706,0.65	1.0,0.902,0.811,1.0,0.806	-0.176	SE	chr7:119844258:119844446:119843847:119844064:119845382:119845501	134	24	359	20	158	379
45732	ENSMUSG00000025237	Parp6	chr9	+	45732	65,60,77,71,67	49,29,36,34,53	72,93,88,139,89	29,30,25,20,23	194	122	1.56545e-05	0.000329117	0.455,0.565,0.574,0.568,0.443	0.61,0.661,0.689,0.814,0.709	-0.176	SE	chr9:59641023:59641096:59640039:59640149:59648829:59648909	340	201	481	127	541	608
45733	ENSMUSG00000025237	Parp6	chr9	+	45733	39,46,67,44,37	49,29,36,34,53	54,50,70,62,73	29,30,25,20,23	244	122	0.000366242	0.0056077	0.285,0.442,0.482,0.393,0.259	0.482,0.455,0.583,0.608,0.613	-0.176	SE	chr9:59641023:59641810:59640039:59640149:59648829:59648909	233	201	309	127	434	436
2228	ENSMUSG00000023007	Prpf40b	chr15	+	2228	1,0,0,7,5	24,14,11,12,18	6,10,6,1,10	14,14,12,4,5	244	122	0.000282334	0.0036129	0.02,0.0,0.0,0.226,0.122	0.176,0.263,0.2,0.111,0.5	-0.176	RI	chr15:99314842:99315286:99314842:99314980:99315190:99315286	13	79	33	49	92	82
26027	ENSMUSG00000030766	Arhgap17	chr7	-	26027	116,68,68,63,67	83,79,47,73,94	73,88,155,45,109	32,53,54,29,44	244	122	3.97435e-06	9.53843e-05	0.411,0.301,0.42,0.301,0.263	0.533,0.454,0.589,0.437,0.553	-0.174	SE	chr7:123294471:123294705:123292035:123292205:123296409:123296566	382	376	470	212	758	682
59	ENSMUSG00000002546	Golga2	chr2	+	59	87,67,90,74,48	7,14,2,12,13	24,34,54,49,63	0,0,4,0,0	217	122	2.12095e-09	8.65663e-08	0.875,0.729,0.962,0.776,0.675	1.0,1.0,0.884,1.0,1.0	-0.173	SE	chr2:32296625:32296721:32293314:32293395:32296964:32297008	366	48	224	4	414	228
2143	ENSMUSG00000040945	Rcc2	chr4	+	2143	71,44,40,47,64	111,68,77,81,95	30,51,56,45,71	34,50,60,24,32	182	122	8.86585e-05	0.00157231	0.3,0.303,0.258,0.28,0.311	0.372,0.406,0.385,0.557,0.598	-0.173	SE	chr4:140701143:140701204:140700540:140700749:140701510:140701650	266	432	253	200	698	453
23580	ENSMUSG00000021569	Trip13	chr13	-	23580	1.14995e+15	129111131128133	7.73113e+16	4,8,4,1,0	208	122	0	0	0.839,0.834,0.81,0.811,0.814	0.991,0.988,0.995,0.998,1.0	-0.173	SE	chr13:73920347:73920434:73919994:73920101:73921172:73921236	4979	632	5049	17	5611	5066
34731	ENSMUSG00000046707	Csnk2a2	chr8	-	34731	216148124155152	29,26,14,24,10	89146140132146	2,2,0,0,1	223	122	0	0	0.803,0.757,0.829,0.779,0.893	0.961,0.976,1.0,1.0,0.988	-0.173	SE	chr8:95477211:95477313:95465650:95465710:95487564:95487579	795	103	653	5	898	658
38405	ENSMUSG00000028759	Hp1bp3	chr4	+	38405	106,88,63,61,81	17,19,11,15,22	56,67,91,111,87	2,10,7,2,8	244	122	1.96434e-06	4.99227e-05	0.757,0.698,0.741,0.67,0.648	0.933,0.77,0.867,0.965,0.845	-0.173	SE	chr4:138221525:138221718:138217267:138217294:138222088:138222188	399	84	412	29	483	441
42025	ENSMUSG00000028037	Ifi44	chr3	-	42025	80,70,28,66,20	18,22,12,12,8	53,91,74,73,47	4,4,11,6,15	226	122	0.00119299	0.0159677	0.706,0.632,0.557,0.748,0.574	0.877,0.925,0.784,0.868,0.628	-0.173	SE	chr3:151749144:151749249:151747617:151747654:151749835:151749903	264	72	338	40	336	378
33937	ENSMUSG00000020792	Exoc7	chr11	-	33937	43,37,29,43,54	194193212223238	10,31,17,23,20	17,31,41,19,42	244	122	6.70385e-10	2.85666e-08	0.1,0.087,0.064,0.088,0.102	0.227,0.333,0.172,0.377,0.192	-0.172	SE	chr11:116296729:116296880:116295543:116295689:116297570:116297663	206	1060	101	150	1266	251
35071	ENSMUSG00000021224	Numb	chr12	-	35071	0,0,6,2,1	76,33,44,47,34	10,44,24,18,33	38,43,88,54,52	244	122	0	0	0.0,0.0,0.064,0.021,0.014	0.116,0.338,0.12,0.143,0.241	-0.172	SE	chr12:83797196:83797343:83794035:83796154:83799507:83799523	9	234	129	275	243	404
37710	ENSMUSG00000022307	Oxr1	chr15	+	37710	3,1,5,0,1	17,19,38,19,41	8,33,3,18,7	31,26,22,53,34	149	122	2.32212e-06	5.83797e-05	0.126,0.041,0.097,0.0,0.02	0.174,0.51,0.1,0.218,0.144	-0.172	SE	chr15:41838251:41838279:41833466:41833621:41850458:41850584	10	134	69	166	144	235
1987	ENSMUSG00000025484	Bet1l	chr7	-	1987	17,18,13,14,8	1,6,2,2,0	29,14,18,19,29	0,0,1,0,0	244	122	5.76505e-06	0.000152512	0.895,0.6,0.765,0.778,1.0	1.0,1.0,0.9,1.0,1.0	-0.172	RI	chr7:140854764:140855165:140854764:140854937:140855073:140855165	70	11	109	1	81	110
2553	ENSMUSG00000022617	Chkb	chr15	-	2553	32,46,22,31,17	33,28,20,24,25	77,47,62,51,45	31,24,17,18,40	244	122	0.00279397	0.0227108	0.327,0.451,0.355,0.392,0.254	0.554,0.495,0.646,0.586,0.36	-0.172	RI	chr15:89428410:89428827:89428410:89428578:89428713:89428827	148	130	282	130	278	412
3154	ENSMUSG00000021185	Dglucy	chr12	+	3154	76112118146139	26,12,13,11,18	68,89,64,54,92	1,2,2,0,6	244	122	5.09047e-08	1.71434e-06	0.594,0.824,0.819,0.869,0.794	0.971,0.957,0.941,1.0,0.885	-0.171	SE	chr12:100856920:100857069:100850112:100850373:100859532:100859652	591	80	367	11	671	378
3418	ENSMUSG00000023007	Prpf40b	chr15	+	3418	0,0,0,3,1	24,14,11,12,18	4,4,3,1,7	14,14,12,4,5	200	122	9.69668e-07	4.28942e-05	0.0,0.0,0.0,0.132,0.033	0.148,0.148,0.132,0.132,0.461	-0.171	A3SS	chr15:99315111:99315286:99315190:99315286:99314842:99314980	4	79	19	49	83	68
4404	ENSMUSG00000023249	Parp3	chr9	-	4404	1,0,2,2,3	54,29,43,48,37	10,13,12,11,4	26,39,34,38,39	136	122	5.59472e-11	6.29327e-09	0.016,0.0,0.04,0.036,0.068	0.257,0.23,0.24,0.206,0.084	-0.171	A3SS	chr9:106474396:106474535:106474396:106474520:106474679:106474868	8	211	50	176	219	226
14097	ENSMUSG00000022779	Top3b	chr16	+	14097	99,69,83,84,114	75,99,68,84,104	94106149127125	58,66,59,48,54	205	122	9.62727e-07	2.64497e-05	0.44,0.293,0.421,0.373,0.395	0.491,0.489,0.6,0.612,0.579	-0.17	SE	chr16:16875071:16875155:16870786:16871055:16877831:16878016	449	430	601	285	879	886
22329	ENSMUSG00000030538	Cib1	chr7	-	22329	31,15,19,19,31	35,35,22,50,48	23,21,22,35,18	18,18,11,27,22	156	122	0.00165888	0.0213396	0.409,0.251,0.403,0.229,0.336	0.5,0.477,0.61,0.503,0.39	-0.17	SE	chr7:80232343:80232378:80228397:80228548:80232509:80232565	115	190	119	96	305	215
18954	ENSMUSG00000025780	Itih5	chr2	+	18954	75,91,83,111,86	17,15,11,13,8	53,65,89,48,78	0,0,6,0,4	223	122	9.20836e-09	3.42375e-07	0.707,0.768,0.805,0.824,0.855	1.0,1.0,0.89,1.0,0.914	-0.169	SE	chr2:10186954:10187056:10185518:10185682:10190199:10190450	446	64	333	10	510	343
40628	ENSMUSG00000034471	Caskin2	chr11	-	40628	18,21,21,10,58	8,0,0,6,0	20,20,20,39,29	0,0,0,0,0	173	122	4.76909e-05	0.000900947	0.613,1.0,1.0,0.54,1.0	1.0,1.0,1.0,1.0,1.0	-0.169	SE	chr11:115807838:115807890:115807263:115807361:115811886:115812382	128	14	128	0	142	128
42980	ENSMUSG00000041264	Uspl1	chr5	+	42980	25,9,17,26,42	41,36,84,65,76	31,42,42,51,30	46,30,60,32,35	244	122	4.01808e-06	9.63078e-05	0.234,0.111,0.092,0.167,0.216	0.252,0.412,0.259,0.443,0.3	-0.169	SE	chr5:149185484:149185661:149184662:149184806:149187707:149187876	119	302	196	203	421	399
43841	ENSMUSG00000037523	Mavs	chr2	+	43841	223107171197230	23,11,18,24,25	239297289219213	0,2,6,0,0	244	122	0	0	0.829,0.829,0.826,0.804,0.821	1.0,0.987,0.96,1.0,1.0	-0.168	SE	chr2:131240314:131240492:131238735:131238910:131241879:131242049	928	101	1257	8	1029	1265
3659	ENSMUSG00000030815	Phkg2	chr7	+	3659	68,50,42,81,55	251214181242223	104,82,77,116,99	118,139,128,92,136	244	122	1.11022e-16	1.90044e-14	0.119,0.105,0.104,0.143,0.11	0.306,0.228,0.231,0.387,0.267	-0.168	RI	chr7:127577534:127578029:127577534:127577710:127577974:127578029	296	1111	478	613	1407	1091
31294	ENSMUSG00000020102	Slc16a7	chr10	-	31294	25,6,7,21,12	8,2,1,4,1	13,15,30,7,10	0,0,3,1,1	225	122	0.000227946	0.00367754	0.629,0.619,0.791,0.74,0.867	1.0,1.0,0.844,0.791,0.844	-0.167	SE	chr10:125377474:125377578:125341780:125341850:125389286:125389368	71	16	75	5	87	80
40783	ENSMUSG00000028832	Stmn1	chr4	+	40783	23,44,22,63,96	58,0,0,6,0	91,123,99,79,127	6,0,0,0,0	194	122	0.00170492	0.0218729	0.2,1.0,1.0,0.868,1.0	0.905,1.0,1.0,1.0,1.0	-0.167	SE	chr4:134470102:134470175:134468319:134468429:134472803:134472995	248	64	519	6	312	525
43725	ENSMUSG00000028580	Pum1	chr4	+	43725	275180230203248	30,26,17,23,32	240194275193272	0,0,0,3,0	226	122	0	0	0.832,0.789,0.88,0.827,0.807	1.0,1.0,1.0,0.972,1.0	-0.167	SE	chr4:130743689:130743794:130741462:130741556:130746977:130747129	1136	128	1174	3	1264	1177
8029	ENSMUSG00000054426	A930005H10Rik	chr3	-	8029	465237330263246	324304238273279	286313300295285	103191156118149	244	122	1.23442e-08	4.53026e-07	0.418,0.28,0.409,0.325,0.306	0.581,0.45,0.49,0.556,0.489	-0.166	SE	chr3:115886213:115886375:115881580:115881838:115887775:115888094	1541	1418	1479	717	2959	2196
14095	ENSMUSG00000022779	Top3b	chr16	+	14095	92,74,81,84,113	75,99,68,84,104	92116138120118	58,66,59,48,54	208	122	1.08528e-07	3.45826e-06	0.418,0.305,0.411,0.37,0.389	0.482,0.508,0.578,0.595,0.562	-0.166	SE	chr16:16875068:16875155:16870839:16871055:16877831:16878016	444	430	584	285	874	869
1384	ENSMUSG00000037112	Sik2	chr9	-	1384	25,15,6,18,26	2,2,3,1,3	25,18,30,18,30	0,2,1,0,1	244	122	0.000558074	0.00624614	0.862,0.789,0.5,0.9,0.813	1.0,0.818,0.937,1.0,0.937	-0.166	RI	chr9:50892800:50895961:50892800:50893389:50895343:50895961	90	11	121	4	101	125
13517	ENSMUSG00000059142	Zfp945	chr17	-	13517	9,1,10,11,16	86,70,59,81,93	34,58,63,75,38	108,102,77,104,85	242	122	0	0	0.05,0.007,0.079,0.064,0.08	0.137,0.223,0.292,0.267,0.184	-0.165	SE	chr17:22861731:22861852:22861505:22861561:22865246:22865336	47	389	268	476	436	744
8251	ENSMUSG00000022677	Fopnl	chr16	-	8251	54,85,80,78,61	32,50,34,22,33	100,135,96,97,146	21,32,27,31,23	244	122	8.23293e-05	0.00147257	0.458,0.459,0.541,0.639,0.48	0.704,0.678,0.64,0.61,0.76	-0.163	SE	chr16:14313815:14314013:14304453:14304587:14317293:14317347	358	171	574	134	529	708
19756	ENSMUSG00000090626	Tex9	chr9	-	19756	134,140,90,115,139	31,22,28,18,26	103214195140160	11,7,10,17,10	244	122	1.30208e-08	4.76972e-07	0.684,0.761,0.616,0.762,0.728	0.824,0.939,0.907,0.805,0.889	-0.163	SE	chr9:72477736:72477910:72473657:72473792:72478339:72478422	618	125	812	55	743	867
4718	ENSMUSG00000020271	Fbxw11	chr11	+	4718	35,28,24,19,29	13,1,8,2,5	11,13,23,26,26	0,2,0,0,5	244	122	0.00164375	0.0211793	0.574,0.933,0.6,0.826,0.744	1.0,0.765,1.0,1.0,0.722	-0.162	SE	chr11:32652747:32652904:32642783:32642935:32680200:32680302	135	29	99	7	164	106
15633	ENSMUSG00000026767	Mindy3	chr2	-	15633	93,95,86,66,76	27,14,7,18,9	233305269209203	7,8,7,5,5	173	122	5.55112e-16	3.85681e-14	0.708,0.827,0.897,0.721,0.856	0.959,0.964,0.964,0.967,0.966	-0.162	SE	chr2:12401024:12401076:12399658:12400137:12403997:12404166	416	75	1219	32	491	1251
37114	ENSMUSG00000040761	Spen	chr4	-	37114	38,50,70,51,79	15,6,11,7,3	58,29,56,61,75	14,0,0,0,0	235	122	0.000207658	0.00337492	0.568,0.812,0.768,0.791,0.932	0.683,1.0,1.0,1.0,1.0	-0.162	SE	chr4:141485558:141485672:141483724:141483825:141487565:141487679	288	42	279	14	330	293
1847	ENSMUSG00000021661	Ankra2	chr13	+	1847	25,68,46,53,38	62,75,54,34,40	119,97,128,103,126	60,56,78,63,66	244	122	2.36135e-05	0.000480526	0.168,0.312,0.299,0.438,0.322	0.498,0.464,0.451,0.45,0.488	-0.162	RI	chr13:98272771:98273918:98272771:98272852:98273377:98273918	230	265	573	323	495	896
16882	ENSMUSG00000022701	Ccdc191	chr16	+	16882	116,101,51,51,131	25,8,8,3,14	104,92,90,101,101	4,0,2,0,2	244	122	8.55538e-12	4.40791e-10	0.699,0.863,0.761,0.895,0.824	0.929,1.0,0.957,1.0,0.962	-0.161	SE	chr16:43898089:43898231:43889799:43890038:43905345:43905483	450	58	488	8	508	496
39152	ENSMUSG00000049755	Zfp672	chr11	-	39152	89,31,73,70,57	21,10,0,12,14	51,53,53,22,80	0,2,4,1,6	209	122	5.10855e-05	0.000958687	0.712,0.644,1.0,0.773,0.704	1.0,0.939,0.886,0.928,0.886	-0.161	SE	chr11:58319866:58319954:58319323:58319590:58322568:58322729	320	57	259	13	377	272
41888	ENSMUSG00000074582	Arfgef2	chr2	+	41888	47,45,38,34,58	13,3,7,10,24	25,67,42,23,36	2,0,8,0,5	190	122	0.000210193	0.00341194	0.699,0.906,0.777,0.686,0.608	0.889,1.0,0.771,1.0,0.822	-0.161	SE	chr2:166842684:166842753:166836201:166836457:166845449:166845601	222	57	193	15	279	208
9890	ENSMUSG00000015377	Dennd6b	chr15	-	9890	25,20,23,35,22	44,34,29,52,32	20,27,28,24,23	9,21,23,29,14	244	122	0.00129586	0.0171365	0.221,0.227,0.284,0.252,0.256	0.526,0.391,0.378,0.293,0.451	-0.16	SE	chr15:89192934:89193118:89190989:89191028:89196218:89196444	125	191	122	96	316	218
11002	ENSMUSG00000023206	Il15ra	chr2	+	11002	32,9,12,21,29	3,7,0,4,1	11,24,29,18,21	0,4,1,0,0	244	122	0.00125622	0.0166845	0.842,0.391,1.0,0.724,0.935	1.0,0.75,0.935,1.0,1.0	-0.159	SE	chr2:11723412:11723610:11718263:11718458:11724095:11724128	103	15	103	5	118	108
5750	ENSMUSG00000038241	Cep250	chr2	+	5750	0,0,1,0,3	26,7,21,16,10	1,0,4,9,6	11,9,10,20,9	124	122	3.31046e-06	0.00012532	0.0,0.0,0.045,0.0,0.228	0.082,0.0,0.282,0.307,0.396	-0.159	A3SS	chr2:155974249:155974483:155974252:155974483:155973342:155973489	4	80	20	59	84	79
1417	ENSMUSG00000063052	Lrrc40	chr3	+	1417	138,75,73,58,95	64,83,50,56,82	75,113,77,70,84	19,44,48,31,33	161	122	0.00041697	0.00629933	0.62,0.406,0.525,0.44,0.467	0.749,0.661,0.549,0.631,0.659	-0.158	SE	chr3:158041619:158041659:158040440:158040622:158043560:158043690	439	335	419	175	774	594
8105	ENSMUSG00000005871	Apc	chr18	+	8105	24,20,22,39,32	12,0,6,8,3	45,22,14,31,41	0,5,0,3,0	226	122	0.000646934	0.00932261	0.519,1.0,0.664,0.725,0.852	1.0,0.704,1.0,0.848,1.0	-0.158	SE	chr18:34289837:34289942:34279268:34279352:34296030:34296129	137	29	153	8	166	161
26737	ENSMUSG00000026790	Odf2	chr2	+	26737	279115183223214	128,62,48,93,114	235222283247267	53,67,52,39,63	238	122	1.17662e-06	3.15399e-05	0.528,0.487,0.662,0.551,0.49	0.694,0.629,0.736,0.765,0.685	-0.158	SE	chr2:29893037:29893154:29892185:29892276:29893443:29893512	1014	445	1254	274	1459	1528
28680	ENSMUSG00000061533	Cep128	chr12	-	28680	65,54,33,39,48	4,8,8,3,6	63,51,86,63,86	0,3,0,0,0	208	122	4.31393e-11	2.06943e-09	0.905,0.798,0.708,0.884,0.824	1.0,0.909,1.0,1.0,1.0	-0.158	SE	chr12:91364359:91364446:91348749:91348876:91370061:91370196	239	29	349	3	268	352
30362	ENSMUSG00000036986	Pml	chr9	-	30362	354249272325412	136,133,88,136,171	385311500334354	92,60,76,63,98	244	122	3.04904e-10	1.34851e-08	0.565,0.483,0.607,0.544,0.546	0.677,0.722,0.767,0.726,0.644	-0.158	SE	chr9:58230490:58230628:58229827:58230086:58233152:58233247	1612	664	1884	389	2276	2273
2178	ENSMUSG00000026399	Cd55	chr1	-	2178	9,6,11,15,6	82,69,94,83,94	32,12,39,23,20	58,44,37,48,46	244	122	1.22569e-13	1.55076e-11	0.052,0.042,0.055,0.083,0.031	0.216,0.12,0.345,0.193,0.179	-0.158	RI	chr1:130448327:130449563:130448327:130448408:130449416:130449563	47	422	126	233	469	359
8403	ENSMUSG00000102644	Thap6	chr5	+	8403	14,14,19,16,12	0,2,1,7,0	5,18,15,4,16	0,0,0,0,0	244	122	0.000250083	0.00399729	1.0,0.778,0.905,0.533,1.0	1.0,1.0,1.0,1.0,1.0	-0.157	SE	chr5:91963234:91963522:91962388:91962978:91963682:91963785	75	10	58	0	85	58
16151	ENSMUSG00000019961	Tmpo	chr10	-	16151	5.15942e+19	908693667915699	3.55741e+19	177165250225254	217	122	0	0	0.762,0.773,0.772,0.717,0.773	0.919,0.933,0.904,0.915,0.911	-0.157	SE	chr10:91153084:91153180:91152627:91152738:91158747:91158845	21732	3882	20698	1071	25614	21769
23062	ENSMUSG00000051736	Fam229b	chr10	-	23062	46,25,18,17,35	0,2,0,3,11	20,31,23,26,25	0,0,0,0,0	244	122	3.76365e-07	1.09949e-05	1.0,0.862,1.0,0.739,0.614	1.0,1.0,1.0,1.0,1.0	-0.157	SE	chr10:39120225:39120396:39118867:39119034:39122176:39122335	141	16	125	0	157	125
39431	ENSMUSG00000030279	C2cd5	chr6	-	39431	75,58,29,33,69	108,61,92,95,103	121,63,94,84,99	77,84,100,68,76	172	122	8.9131e-05	0.00157928	0.33,0.403,0.183,0.198,0.322	0.527,0.347,0.4,0.467,0.48	-0.157	SE	chr6:143020323:143020374:143017882:143018073:143029159:143029246	264	459	461	405	723	866
3561	ENSMUSG00000029716	Tfr2	chr5	+	3561	5,0,2,7,6	22,12,8,25,12	13,19,20,5,12	9,21,26,13,33	244	122	0.000615608	0.00678568	0.102,0.0,0.111,0.123,0.2	0.419,0.311,0.278,0.161,0.154	-0.157	RI	chr5:137583404:137584066:137583404:137583632:137583925:137584066	20	79	69	102	99	171
4748	ENSMUSG00000025602	Zfp202	chr9	+	4748	46,26,15,30,38	11,1,7,3,0	29,12,49,27,34	0,0,0,0,6	241	122	0.000711843	0.0100966	0.679,0.929,0.52,0.835,1.0	1.0,1.0,1.0,1.0,0.742	-0.156	SE	chr9:40210440:40210560:40209766:40209896:40210895:40213189	155	22	151	6	177	157
11148	ENSMUSG00000032409	Atr	chr9	+	11148	40,21,44,24,49	4,1,6,2,5	64,63,75,35,78	0,0,0,0,0	244	122	8.98249e-10	3.76297e-08	0.833,0.913,0.786,0.857,0.831	1.0,1.0,1.0,1.0,1.0	-0.156	SE	chr9:95922747:95922907:95921652:95921832:95927168:95927348	178	18	315	0	196	315
26988	ENSMUSG00000043411	Usp48	chr4	+	26988	98,58,45,57,67	8,6,7,11,5	113,93,152,109,128	0,4,3,0,4	244	122	3.14961e-09	1.24826e-07	0.86,0.829,0.763,0.722,0.87	1.0,0.921,0.962,1.0,0.941	-0.156	SE	chr4:137637759:137637890:137634897:137635008:137644342:137644498	325	37	595	11	362	606
3284	ENSMUSG00000026811	St6galnac6	chr2	+	3284	27,16,12,21,11	3,0,0,7,2	5,5,5,10,4	0,0,0,0,0	212	122	6.5835e-06	0.000151146	0.838,1.0,1.0,0.633,0.76	1.0,1.0,1.0,1.0,1.0	-0.154	SE	chr2:32609225:32609316:32606960:32607111:32612223:32612327	87	12	29	0	99	29
23557	ENSMUSG00000045031	Cetn4	chr3	-	23557	13,21,10,27,14	1,3,0,0,5	23,16,5,15,23	0,0,0,0,0	244	122	0.00130286	0.0172175	0.867,0.778,1.0,1.0,0.583	1.0,1.0,1.0,1.0,1.0	-0.154	SE	chr3:37309344:37309482:37307748:37309181:37310292:37310439	85	9	82	0	94	82
586	ENSMUSG00000025193	Cutc	chr19	+	586	48,52,39,42,31	9,3,6,1,3	37,38,45,27,25	0,0,0,0,0	225	122	1.57316e-09	6.49433e-08	0.743,0.904,0.779,0.958,0.849	1.0,1.0,1.0,1.0,1.0	-0.153	SE	chr19:43762902:43763006:43760688:43760724:43767200:43767306	212	22	172	0	234	172
19471	ENSMUSG00000057551	Zfp317	chr9	+	19471	62,65,53,47,79	15,0,12,10,23	75,71,115,59,84	0,8,3,0,6	176	122	4.6771e-07	1.34847e-05	0.741,1.0,0.754,0.765,0.704	1.0,0.86,0.964,1.0,0.907	-0.153	SE	chr9:19632333:19632388:19629096:19629206:19641065:19641254	306	60	404	17	366	421
47340	ENSMUSG00000050323	Ndufaf6	chr4	-	47340	122,97,86,70,100	25,26,30,18,21	48,72,98,57,85	1,14,1,5,16	178	122	1.8359e-05	0.000380332	0.77,0.719,0.663,0.727,0.765	0.971,0.779,0.985,0.887,0.785	-0.153	SE	chr4:11066650:11066707:11059011:11059113:11070199:11070322	475	120	360	37	595	397
22109	ENSMUSG00000021548	Ccnh	chr13	+	22109	187174124140113	25,17,29,19,13	111151132157172	0,1,5,8,16	244	122	1.11028e-08	4.08979e-07	0.789,0.837,0.681,0.787,0.813	1.0,0.987,0.93,0.908,0.843	-0.152	SE	chr13:85197350:85197561:85190753:85190876:85202440:85202496	738	103	723	30	841	753
24339	ENSMUSG00000097145	9230114K14Rik	chr5	+	24339	16,15,15,22,17	8,2,2,0,0	19,20,31,12,14	0,0,0,0,0	182	122	2.29186e-05	0.000467229	0.573,0.834,0.834,1.0,1.0	1.0,1.0,1.0,1.0,1.0	-0.152	SE	chr5:52192917:52192978:52190671:52190937:52194800:52194890	85	12	96	0	97	96
30881	ENSMUSG00000034354	Mtmr3	chr11	-	30881	137,93,57,119,126	127,65,97,92,141	167162183138189	70,99,99,67,107	232	122	3.82106e-06	9.18723e-05	0.362,0.429,0.236,0.405,0.32	0.556,0.463,0.493,0.52,0.482	-0.152	SE	chr11:4485878:4485989:4485362:4485451:4487233:4488632	532	522	839	442	1054	1281
40056	ENSMUSG00000066892	Fbxl12	chr9	-	40056	69,34,15,52,47	8,6,5,10,3	69,61,46,30,49	2,4,2,2,2	225	122	0.000274739	0.0043476	0.824,0.754,0.619,0.738,0.895	0.949,0.892,0.926,0.891,0.93	-0.152	SE	chr9:20644194:20644298:20641562:20642096:20644572:20644742	217	32	255	12	249	267
3776	ENSMUSG00000031256	Cstf2	chrX	+	3776	344279307362359	190236171198191	395464449403485	142149165111142	244	122	9.03092e-11	7.96363e-09	0.475,0.372,0.473,0.478,0.484	0.582,0.609,0.576,0.645,0.631	-0.152	RI	chrX:134069844:134073277:134069844:134069907:134073213:134073277	1651	986	2196	709	2637	2905
2805	ENSMUSG00000035967	Ints6l	chrX	+	2805	81,77,60,85,82	29,15,35,25,38	111,82,101,139,140	17,14,13,30,34	232	122	0.00071151	0.0100955	0.595,0.73,0.474,0.641,0.532	0.774,0.755,0.803,0.709,0.684	-0.151	SE	chrX:56494132:56494243:56493038:56493133:56496515:56496734	385	142	573	108	527	681
13501	ENSMUSG00000042213	Zfand4	chr6	+	13501	33,26,23,35,28	4,1,4,4,7	33,33,37,47,42	0,2,4,0,0	244	122	3.17071e-05	0.000630203	0.805,0.929,0.742,0.814,0.667	1.0,0.892,0.822,1.0,1.0	-0.151	SE	chr6:116305616:116305761:116287981:116288168:116328206:116328324	145	20	192	6	165	198
1186	ENSMUSG00000002983	Relb	chr7	-	1186	36,25,7,30,13	2,0,6,6,0	24,26,36,14,12	0,0,0,1,1	244	122	4.96477e-05	0.000933913	0.9,1.0,0.368,0.714,1.0	1.0,1.0,1.0,0.875,0.857	-0.15	SE	chr7:19617703:19617919:19616374:19616437:19619513:19619842	111	14	112	2	125	114
37179	ENSMUSG00000026771	Spopl	chr2	-	37179	76,63,43,61,47	61,55,76,48,58	54,127,76,84,51	43,47,29,45,43	218	122	0.00101628	0.0138884	0.411,0.391,0.24,0.416,0.312	0.413,0.602,0.595,0.511,0.399	-0.15	SE	chr2:23541518:23541615:23537460:23537638:23543196:23543324	290	298	392	207	588	599
48054	ENSMUSG00000020798	Spns3	chr11	-	48054	96130111148128	19,31,8,18,18	49,75,77,73,97	4,0,4,0,0	187	122	1.48459e-12	8.12368e-11	0.767,0.732,0.901,0.843,0.823	0.889,1.0,0.926,1.0,1.0	-0.15	SE	chr11:72505055:72505121:72499637:72499736:72545887:72545953	613	94	371	8	707	379
23956	ENSMUSG00000031216	Stard8	chrX	+	23956	30,11,19,34,17	4,0,0,5,8	53,42,15,50,37	0,2,0,0,0	203	122	2.72437e-07	8.18178e-06	0.818,1.0,1.0,0.803,0.561	1.0,0.927,1.0,1.0,1.0	-0.149	SE	chrX:99063364:99063446:99060727:99060799:99064393:99064457	111	17	197	2	128	199
8476	ENSMUSG00000024766	Lipo3	chr19	-	8476	243177182182150	28,18,34,39,20	355386399295310	21,5,26,8,18	244	122	5.0826e-13	2.87642e-11	0.813,0.831,0.728,0.7,0.789	0.894,0.975,0.885,0.949,0.896	-0.148	SE	chr19:33582052:33582251:33580464:33580574:33583046:33583164	934	139	1745	78	1073	1823
16581	ENSMUSG00000022546	Gpt	chr15	+	16581	29,21,20,36,21	2,0,4,7,1	48,56,14,15,19	0,1,0,0,0	244	122	5.02009e-07	1.43692e-05	0.879,1.0,0.714,0.72,0.913	1.0,0.966,1.0,1.0,1.0	-0.148	SE	chr15:76698995:76699151:76698714:76698889:76699235:76699348	127	14	152	1	141	153
34601	ENSMUSG00000005102	Eif2ak4	chr2	+	34601	42,27,12,15,25	3,1,3,0,9	16,34,32,21,65	0,2,0,0,0	202	122	1.16336e-06	3.12267e-05	0.894,0.942,0.707,1.0,0.627	1.0,0.911,1.0,1.0,1.0	-0.148	SE	chr2:118410882:118410963:118388617:118388852:118412934:118413083	121	16	168	2	137	170
38687	ENSMUSG00000040621	Gemin8	chrX	+	38687	3,0,1,0,4	19,26,9,15,26	10,9,3,3,5	11,13,22,25,9	230	122	1.78952e-05	0.000371502	0.077,0.0,0.056,0.0,0.075	0.325,0.269,0.067,0.06,0.228	-0.148	SE	chrX:166178533:166178642:166170494:166170550:166178791:166178830	8	95	30	80	103	110
46619	ENSMUSG00000029913	Prdm5	chr6	+	46619	20,24,18,19,24	8,0,0,4,0	18,9,29,8,13	0,0,0,0,0	244	122	5.58061e-05	0.00103843	0.556,1.0,1.0,0.704,1.0	1.0,1.0,1.0,1.0,1.0	-0.148	SE	chr6:65831248:65831371:65794299:65794383:65869180:65869265	105	12	77	0	117	77
3298	ENSMUSG00000066892	Fbxl12	chr9	-	3298	58,42,39,64,51	8,6,5,10,3	116,107,90,101,62	2,4,2,2,2	244	122	3.17271e-07	1.23101e-05	0.784,0.778,0.796,0.762,0.895	0.967,0.93,0.957,0.962,0.939	-0.148	RI	chr9:20642023:20644755:20642023:20642096:20644572:20644755	254	32	476	12	286	488
16906	ENSMUSG00000021709	Erbin	chr13	-	16906	67,28,61,41,63	4,9,19,3,3	59,36,60,73,46	4,0,2,0,5	244	122	0.000327174	0.0050801	0.893,0.609,0.616,0.872,0.913	0.881,1.0,0.937,1.0,0.821	-0.147	SE	chr13:103824719:103824848:103823313:103823406:103827906:103828023	260	38	274	11	298	285
2617	ENSMUSG00000036923	Stox1	chr10	-	2617	19,15,17,30,10	3,5,1,2,0	40,52,25,62,31	3,0,0,0,0	244	122	1.37104e-05	0.00037475	0.76,0.6,0.895,0.882,1.0	0.87,1.0,1.0,1.0,1.0	-0.147	A5SS	chr10:62663954:62666325:62666125:62666325:62659042:62659667	91	11	210	3	102	213
30636	ENSMUSG00000109975	Gm19196	chr12	+	30636	0,0,5,0,0	31,18,17,12,13	7,0,6,12,4	12,7,17,13,16	219	122	8.51797e-08	2.77899e-06	0.0,0.0,0.141,0.0,0.0	0.245,0.0,0.164,0.34,0.122	-0.146	SE	chr12:21554008:21554106:21549866:21549954:21554376:21554474	5	91	29	65	96	94
1836	ENSMUSG00000031310	Zmym3	chrX	-	1836	48,18,36,35,52	15,4,9,11,14	34,30,28,18,27	4,2,1,3,2	142	122	2.19376e-05	0.000554976	0.733,0.795,0.775,0.732,0.761	0.88,0.928,0.96,0.838,0.921	-0.146	A5SS	chrX:101409611:101409780:101409632:101409780:101409153:101409305	189	53	137	12	242	149
1050	ENSMUSG00000022552	Sharpin	chr15	-	1050	20,19,15,24,21	1,2,4,5,2	24,49,56,23,30	1,3,1,0,0	199	122	5.55669e-05	0.00100435	0.925,0.853,0.697,0.746,0.866	0.936,0.909,0.972,1.0,1.0	-0.146	RI	chr15:76348085:76348435:76348085:76348222:76348300:76348435	99	14	182	5	113	187
1857	ENSMUSG00000116673	A630089N07Rik	chr16	-	1857	396172202255198	41,39,17,24,37	153147207175169	7,2,22,3,1	243	122	8.3361e-09	3.11696e-07	0.829,0.689,0.856,0.842,0.729	0.916,0.974,0.825,0.967,0.988	-0.145	SE	chr16:98066543:98066665:98062511:98064238:98067754:98067815	1223	158	851	35	1381	886
8246	ENSMUSG00000022677	Fopnl	chr16	-	8246	210245158237148	30,67,27,25,23	242309245324267	0,24,14,15,16	206	122	4.2133e-13	2.39813e-11	0.806,0.684,0.776,0.849,0.792	1.0,0.884,0.912,0.927,0.908	-0.145	SE	chr16:14311046:14311131:14299243:14300209:14313815:14314013	998	172	1387	69	1170	1456
43041	ENSMUSG00000004591	Pkn2	chr3	-	43041	330152208183212	24,19,8,16,26	243246317223280	1,0,2,0,0	244	122	0	0	0.873,0.8,0.929,0.851,0.803	0.992,1.0,0.988,1.0,1.0	-0.145	SE	chr3:142811913:142812057:142811526:142811602:142820536:142820646	1085	93	1309	3	1178	1312
13428	ENSMUSG00000029521	Chek2	chr5	+	13428	237199219253278	44,10,23,19,23	261383434355385	0,3,3,4,4	237	122	0	0	0.735,0.911,0.831,0.873,0.862	1.0,0.985,0.987,0.979,0.98	-0.144	SE	chr5:110866937:110867053:110866262:110866426:110868007:110868093	1186	119	1818	14	1305	1832
23955	ENSMUSG00000031137	Fgf13	chrX	-	23955	55,45,62,44,98	8,10,16,12,14	48,73,56,49,80	0,0,12,6,12	244	122	0.00419563	0.0477341	0.775,0.692,0.66,0.647,0.778	1.0,1.0,0.7,0.803,0.769	-0.144	SE	chrX:59250798:59250966:59131876:59131950:59567139:59567472	304	60	306	30	364	336
24647	ENSMUSG00000079557	March2	chr17	-	24647	53,22,28,56,30	68,69,31,76,76	48,79,82,69,59	53,62,60,66,39	241	122	1.46913e-05	0.000310348	0.283,0.139,0.314,0.272,0.167	0.314,0.392,0.409,0.346,0.434	-0.144	SE	chr17:33715942:33716062:33709744:33709972:33718545:33718591	189	320	337	280	509	617
26923	ENSMUSG00000030336	Cd27	chr6	-	26923	54,29,20,64,38	6,2,10,0,0	57,57,61,65,50	0,0,0,3,0	244	122	7.61348e-06	0.000172104	0.818,0.879,0.5,1.0,1.0	1.0,1.0,1.0,0.915,1.0	-0.144	SE	chr6:125234514:125234694:125234253:125234316:125236756:125237010	205	18	290	3	223	293
35221	ENSMUSG00000029254	Stap1	chr5	+	35221	608506457461404	81,81,65,84,86	496490628512598	46,23,32,22,29	235	122	0	0	0.796,0.764,0.785,0.74,0.709	0.848,0.917,0.911,0.924,0.915	-0.144	SE	chr5:86081166:86081280:86077988:86078060:86084388:86084445	2436	397	2724	152	2833	2876
711	ENSMUSG00000039456	Morc3	chr16	+	711	114,68,70,95,98	24,20,22,19,12	75,68,90,105,75	3,4,12,6,18	244	122	0.00103061	0.0102708	0.704,0.63,0.614,0.714,0.803	0.926,0.895,0.789,0.897,0.676	-0.144	RI	chr16:93862413:93862715:93862413:93862503:93862640:93862715	445	97	413	43	542	456
1864	ENSMUSG00000013236	Ptprs	chr17	-	1864	73,26,38,44,71	5,7,2,15,6	50,46,85,65,63	4,1,0,6,2	244	122	0.000404879	0.00484855	0.88,0.65,0.905,0.595,0.855	0.862,0.958,1.0,0.844,0.94	-0.144	RI	chr17:56428851:56429157:56428851:56428966:56429098:56429157	252	35	309	13	287	322
14409	ENSMUSG00000023764	Sfi1	chr11	-	14409	19,25,12,28,28	7,0,0,1,4	23,38,55,18,40	0,0,0,0,0	244	122	1.65805e-05	0.000346566	0.576,1.0,1.0,0.933,0.778	1.0,1.0,1.0,1.0,1.0	-0.143	SE	chr11:3134317:3134501:3133071:3133207:3135282:3135542	112	12	174	0	124	174
39727	ENSMUSG00000037020	Wdr62	chr7	-	39727	121,57,90,67,74	35,30,10,17,20	120,57,95,64,162	7,17,4,9,15	187	122	0.000206084	0.00335606	0.693,0.553,0.854,0.72,0.707	0.918,0.686,0.939,0.823,0.876	-0.143	SE	chr7:30244472:30244538:30243832:30243960:30245286:30245505	409	112	498	52	521	550
43726	ENSMUSG00000028580	Pum1	chr4	+	43726	310221259233323	30,26,17,23,32	289224334215315	0,0,0,3,0	223	122	0	0	0.85,0.823,0.893,0.847,0.847	1.0,1.0,1.0,0.975,1.0	-0.143	SE	chr4:130743692:130743794:130741462:130741556:130746977:130747003	1346	128	1377	3	1474	1380
47767	ENSMUSG00000052760	A630001G21Rik	chr1	-	47767	272192179175188	25,18,21,25,18	264286297324321	10,1,8,1,6	244	122	0	0	0.845,0.842,0.81,0.778,0.839	0.93,0.993,0.949,0.994,0.964	-0.143	SE	chr1:85725120:85725289:85723097:85723181:85736471:85736581	1006	107	1492	26	1113	1518
836	ENSMUSG00000040455	Usp45	chr4	+	836	18,9,27,17,14	1,13,0,3,5	10,21,15,16,8	0,2,0,1,2	124	122	0.000551556	0.00973755	0.947,0.405,1.0,0.848,0.734	1.0,0.912,1.0,0.94,0.797	-0.143	A3SS	chr4:21781735:21781908:21781738:21781908:21780340:21780450	85	22	70	5	107	75
2712	ENSMUSG00000034269	Setd5	chr6	+	2712	30,20,34,34,23	2,1,5,5,4	18,10,29,15,17	0,0,0,0,0	178	122	8.03847e-08	4.7235e-06	0.911,0.932,0.823,0.823,0.798	1.0,1.0,1.0,1.0,1.0	-0.143	A3SS	chr6:113110316:113110525:113110373:113110525:113110084:113110221	141	17	89	0	158	89
7046	ENSMUSG00000034833	Tespa1	chr10	+	7046	262250164241197	53,64,45,62,60	278309302356277	34,51,30,35,38	244	122	7.83646e-10	3.31084e-08	0.712,0.661,0.646,0.66,0.621	0.803,0.752,0.834,0.836,0.785	-0.142	SE	chr10:130330981:130331153:130322876:130322969:130347143:130347203	1114	284	1522	188	1398	1710
26827	ENSMUSG00000029629	Phf14	chr6	+	26827	244159148218193	29,16,18,57,50	207256275172221	29,16,10,12,1	244	122	2.44337e-07	7.38823e-06	0.808,0.832,0.804,0.657,0.659	0.781,0.889,0.932,0.878,0.991	-0.142	SE	chr6:11933252:11934019:11926726:11926837:11941429:11941574	962	170	1131	68	1132	1199
30911	ENSMUSG00000040990	Sh3kbp1	chrX	+	30911	1.14292e+17	202151108179161	1.24813e+19	52,95,74,75,68	244	122	0	0	0.739,0.752,0.784,0.74,0.763	0.923,0.871,0.895,0.89,0.91	-0.142	SE	chrX:159961764:159961893:159958212:159958322:159966213:159966482	4900	801	6386	364	5701	6750
36414	ENSMUSG00000071253	Slc25a16	chr10	+	36414	78,53,72,48,83	13,16,20,12,10	80,62,107,69,63	0,16,0,1,14	194	122	0.000117684	0.00203166	0.79,0.676,0.694,0.716,0.839	1.0,0.709,1.0,0.977,0.739	-0.142	SE	chr10:62932718:62932791:62930302:62930436:62937417:62937539	334	71	381	31	405	412
39946	ENSMUSG00000029505	Ep400	chr5	-	39946	44,21,25,18,54	6,0,7,3,3	22,36,55,26,43	3,0,0,0,0	244	122	7.3043e-07	2.04789e-05	0.786,1.0,0.641,0.75,0.9	0.786,1.0,1.0,1.0,1.0	-0.142	SE	chr5:110668549:110668745:110668062:110668190:110670874:110671096	162	19	182	3	181	185
1407	ENSMUSG00000025505	Tmem80	chr7	+	1407	60,65,67,80,70	40,22,22,44,19	76,92,90,82,49	17,18,4,32,15	200	122	0.00462289	0.0452397	0.478,0.643,0.65,0.526,0.692	0.732,0.757,0.932,0.61,0.666	-0.142	A5SS	chr7:141332909:141333008:141332909:141332929:141333637:141333731	342	147	389	86	489	475
4360	ENSMUSG00000039069	Mtg2	chr2	+	4360	96,72,108,83,118	18,12,5,9,13	76,146,118,83,104	0,5,1,5,4	244	122	7.37406e-08	2.41972e-06	0.727,0.75,0.915,0.822,0.819	1.0,0.936,0.983,0.892,0.929	-0.141	SE	chr2:180084450:180084589:180083344:180083460:180085379:180085895	477	57	527	15	534	542
24500	ENSMUSG00000096370	Gm21992	chr19	-	24500	6,6,8,13,10	46,45,41,62,57	17,2,15,5,13	17,27,15,26,15	244	122	0.00053684	0.00787922	0.061,0.063,0.089,0.095,0.081	0.333,0.036,0.333,0.088,0.302	-0.141	SE	chr19:4801550:4801805:4793925:4794009:4811171:4811612	43	251	52	100	294	152
33155	ENSMUSG00000043015	Nemp2	chr1	+	33155	109,54,80,69,56	10,13,18,16,29	97,78,135,97,154	21,14,3,4,21	236	122	0.004067	0.0464439	0.849,0.682,0.697,0.69,0.5	0.705,0.742,0.959,0.926,0.791	-0.141	SE	chr1:52643121:52643236:52642318:52642412:52645260:52645486	368	86	561	63	454	624
1937	ENSMUSG00000026471	Mr1	chr1	-	1937	27,37,21,51,41	4,16,3,8,10	64,57,56,97,58	4,10,0,14,3	201	122	0.00201551	0.0237271	0.804,0.584,0.809,0.795,0.713	0.907,0.776,1.0,0.808,0.921	-0.141	A5SS	chr1:155137513:155137774:155137593:155137774:155136574:155136850	177	41	332	31	218	363
12	ENSMUSG00000072501	Phf20l1	chr15	+	12	13,7,6,11,14	63,41,64,50,47	18,30,19,22,18	31,20,63,41,49	244	122	1.23597e-05	0.000285451	0.094,0.079,0.045,0.099,0.13	0.225,0.429,0.131,0.212,0.155	-0.141	RI	chr15:66622760:66624099:66622760:66622817:66623991:66624099	51	265	107	204	316	311
3954	ENSMUSG00000001240	Ramp2	chr11	+	3954	8,18,5,10,8	16,19,37,29,34	7,11,16,16,16	11,17,11,20,15	243	122	0.0014747	0.0137097	0.201,0.322,0.064,0.148,0.106	0.242,0.245,0.422,0.287,0.349	-0.141	RI	chr11:101247585:101248250:101247585:101247688:101247810:101248250	49	135	66	74	184	140
6419	ENSMUSG00000014353	Tmem87b	chr2	+	6419	9,4,7,3,0	30,45,41,41,26	8,2,14,7,8	24,9,23,25,10	195	122	8.87897e-05	0.00157393	0.158,0.053,0.097,0.044,0.0	0.173,0.122,0.276,0.149,0.334	-0.14	SE	chr2:128839147:128839221:128837301:128837395:128840731:128840803	23	183	39	91	206	130
19908	ENSMUSG00000037536	Fbxo34	chr14	+	19908	71,46,50,71,66	18,14,13,8,25	54,97,79,99,72	4,11,10,13,11	231	122	0.00109542	0.0148017	0.676,0.634,0.67,0.824,0.582	0.877,0.823,0.807,0.801,0.776	-0.14	SE	chr14:47526204:47526314:47472618:47472717:47529174:47529270	304	78	401	49	382	450
39430	ENSMUSG00000030279	C2cd5	chr6	-	39430	33,6,16,14,18	108,61,92,95,103	38,53,47,34,47	77,84,100,68,76	223	122	2.12941e-12	1.15882e-10	0.143,0.051,0.087,0.075,0.087	0.213,0.257,0.205,0.215,0.253	-0.14	SE	chr6:143019327:143019429:143017882:143018073:143029159:143029246	87	459	219	405	546	624
1363	ENSMUSG00000038780	Smurf1	chr5	-	1363	2,1,0,0,5	17,5,8,5,15	6,1,5,3,8	10,23,5,14,9	244	122	0.00569712	0.0390407	0.056,0.091,0.0,0.0,0.143	0.231,0.021,0.333,0.097,0.308	-0.14	RI	chr5:144880624:144881819:144880624:144880700:144881617:144881819	8	50	23	61	58	84
22981	ENSMUSG00000025977	Boll	chr1	-	22981	12,15,18,11,7	1,4,0,7,0	31,20,12,40,9	0,0,1,3,0	193	122	0.000137632	0.0023404	0.884,0.703,1.0,0.498,1.0	1.0,1.0,0.884,0.894,1.0	-0.139	SE	chr1:55323649:55323721:55305675:55305723:55340472:55340600	63	12	112	4	75	116
42983	ENSMUSG00000041264	Uspl1	chr5	+	42983	133129178197213	135,106,110,97,96	118131178155147	35,65,67,54,51	244	122	0.000191762	0.00314623	0.33,0.378,0.447,0.504,0.526	0.628,0.502,0.571,0.589,0.59	-0.139	SE	chr5:149187707:149187876:149184559:149184806:149188344:149188473	850	544	729	272	1394	1001
709	ENSMUSG00000057894	Zfp329	chr7	-	709	13,4,29,33,30	7,0,0,1,2	14,3,7,36,29	0,0,0,0,0	244	122	0.00114701	0.0150696	0.481,1.0,1.0,0.943,0.882	1.0,1.0,1.0,1.0,1.0	-0.139	A5SS	chr7:12809696:12811666:12810805:12811666:12807911:12807973	109	10	89	0	119	89
4060	ENSMUSG00000032952	Ap4b1	chr3	+	4060	154,69,91,132,107	27,16,9,14,6	195155211114159	3,6,6,1,10	225	122	3.47934e-09	1.37209e-07	0.756,0.7,0.846,0.836,0.906	0.972,0.933,0.95,0.984,0.896	-0.138	SE	chr3:103818803:103818907:103817759:103817843:103820253:103820461	553	72	834	26	625	860
13035	ENSMUSG00000040511	Pvr	chr7	-	13035	52,29,51,47,75	7,6,4,0,2	35,52,29,26,69	0,0,0,0,0	244	122	5.36693e-08	1.79828e-06	0.788,0.707,0.864,1.0,0.949	1.0,1.0,1.0,1.0,1.0	-0.138	SE	chr7:19916873:19917170:19914737:19914864:19918561:19918909	254	19	211	0	273	211
28831	ENSMUSG00000031629	Cenpu	chr8	+	28831	69,56,29,44,47	15,12,7,10,14	77,91,90,112,69	9,5,16,11,3	182	122	0.000153252	0.00257401	0.755,0.758,0.735,0.747,0.692	0.852,0.924,0.79,0.872,0.939	-0.138	SE	chr8:46561777:46561838:46559868:46559971:46568609:46568679	245	58	439	44	303	483
43233	ENSMUSG00000032503	Arpp21	chr9	-	43233	74,75,90,78,102	158,106,93,114,110	156127134163171	104,123,80,156,104	220	122	4.40219e-06	0.000104577	0.206,0.282,0.349,0.275,0.34	0.454,0.364,0.482,0.367,0.477	-0.138	SE	chr9:112155417:112155516:112149334:112149372:112157689:112157798	419	581	751	567	1000	1318
48371	ENSMUSG00000022517	Mgrn1	chr16	+	48371	71,35,58,48,55	94,101,48,100,85	84,83,98,74,85	74,70,73,76,64	187	122	0.00014214	0.00241187	0.33,0.184,0.441,0.238,0.297	0.425,0.436,0.467,0.388,0.464	-0.138	SE	chr16:4926308:4926374:4924422:4924532:4927674:4927901	267	428	424	357	695	781
42026	ENSMUSG00000028037	Ifi44	chr3	-	42026	126,108,47,113,38	18,22,12,12,8	101,151,134,129,75	4,4,11,6,15	244	122	0.000183443	0.00303098	0.778,0.711,0.662,0.825,0.704	0.927,0.95,0.859,0.915,0.714	-0.137	SE	chr3:151749144:151749644:151747617:151747654:151749835:151749960	432	72	590	40	504	630
5267	ENSMUSG00000016481	Cr1l	chr1	-	5267	410388325329254	137,96,119,121,122	571525652536575	75,90,132,99,154	226	122	9.25179e-08	2.99622e-06	0.618,0.686,0.596,0.595,0.529	0.804,0.759,0.727,0.745,0.668	-0.136	SE	chr1:195106817:195106922:195097381:195098841:195111079:195111155	1706	595	2859	550	2301	3409
7038	ENSMUSG00000004233	Wars2	chr3	+	7038	115,19,71,69,74	11,8,2,7,11	53,78,41,75,75	0,3,4,3,3	240	122	0.000841543	0.0117514	0.842,0.547,0.947,0.834,0.774	1.0,0.93,0.839,0.927,0.927	-0.136	SE	chr3:99214655:99214774:99205224:99205310:99216458:99219203	348	39	322	13	387	335
17486	ENSMUSG00000051998	Lax1	chr1	-	17486	88,83,43,71,128	15,2,10,16,5	205121185173159	9,3,5,10,0	225	122	7.06129e-06	0.000160998	0.761,0.957,0.7,0.706,0.933	0.925,0.956,0.953,0.904,1.0	-0.136	SE	chr1:133684005:133684109:133683537:133683642:133688820:133689004	413	48	843	27	461	870
17775	ENSMUSG00000004319	Clcn3	chr8	-	17775	30,18,38,35,31	59,32,37,61,65	40,38,64,47,34	40,31,47,31,49	197	122	0.000759559	0.0107045	0.239,0.258,0.389,0.262,0.228	0.382,0.432,0.457,0.484,0.301	-0.136	SE	chr8:60914752:60914828:60911895:60913175:60919339:60919556	152	254	223	198	406	421
5302	ENSMUSG00000099481	Xndc1	chr7	+	5302	121,136,88,109,99	39,21,13,48,51	128130107105111	5,12,15,16,24	153	122	4.41566e-05	0.00125068	0.712,0.838,0.844,0.644,0.608	0.953,0.896,0.85,0.84,0.787	-0.136	A3SS	chr7:102071186:102071361:102071218:102071361:102069896:102069991	553	172	581	72	725	653
5727	ENSMUSG00000031903	Pla2g15	chr8	+	5727	117,90,94,105,66	16,4,8,27,12	125,125,88,131,159	7,8,4,0,6	244	122	1.83408e-06	7.22078e-05	0.785,0.918,0.855,0.66,0.733	0.899,0.887,0.917,1.0,0.93	-0.136	A3SS	chr8:106161083:106161308:106161208:106161308:106160580:106160679	472	67	628	25	539	653
25028	ENSMUSG00000025860	Xiap	chrX	+	25028	11,24,22,24,20	5,0,2,3,0	19,18,11,5,23	0,0,1,0,0	244	122	0.00035539	0.00546474	0.524,1.0,0.846,0.8,1.0	1.0,1.0,0.846,1.0,1.0	-0.135	SE	chrX:42094366:42095272:42068397:42068872:42096612:42096712	101	10	76	1	111	77
44992	ENSMUSG00000073792	Alg6	chr4	+	44992	21,20,10,9,14	3,2,0,1,4	27,12,32,28,32	3,0,0,0,0	210	122	0.000272137	0.00431504	0.803,0.853,1.0,0.839,0.67	0.839,1.0,1.0,1.0,1.0	-0.135	SE	chr4:99739213:99739302:99738123:99738213:99744489:99744625	74	10	131	3	84	134
1964	ENSMUSG00000038271	Iffo1	chr6	+	1964	1,4,0,3,2	26,17,18,22,26	4,9,5,6,5	9,8,24,22,15	244	122	5.09634e-05	0.00141298	0.019,0.105,0.0,0.064,0.037	0.182,0.36,0.094,0.12,0.143	-0.135	A3SS	chr6:125152443:125152771:125152613:125152771:125151384:125151525	10	109	29	78	119	107
48549	ENSMUSG00000026707	Nsun6	chr2	-	48549	52,51,37,51,36	11,5,1,4,4	93,134,85,103,111	2,1,1,0,3	231	122	1.3841e-08	5.03763e-07	0.714,0.843,0.951,0.871,0.826	0.961,0.986,0.978,1.0,0.951	-0.134	SE	chr2:15039732:15039842:15038073:15038227:15042226:15042306	227	25	526	7	252	533
2391	ENSMUSG00000086370	Ftx	chrX	-	2391	29,14,21,18,14	14,5,4,2,3	11,32,21,10,17	5,2,0,0,1	142	122	0.000818139	0.0113774	0.64,0.706,0.819,0.885,0.8	0.654,0.932,1.0,1.0,0.936	-0.134	A5SS	chrX:103613022:103613195:103613043:103613195:103609303:103609416	96	28	91	8	124	99
3108	ENSMUSG00000034303	Ccdc15	chr9	-	3108	7,3,3,8,3	71,43,61,73,59	2,11,4,7,20	34,26,38,26,31	131	122	0.000103505	0.00212185	0.084,0.061,0.044,0.093,0.045	0.052,0.283,0.089,0.2,0.375	-0.134	A5SS	chr9:37342425:37342621:37342435:37342621:37320396:37320510	24	307	44	155	331	199
3078	ENSMUSG00000026988	Wdsub1	chr2	-	3078	48,23,33,50,52	30,26,11,27,35	59,66,26,52,75	26,14,12,24,12	124	122	0.00409603	0.0457415	0.612,0.465,0.747,0.646,0.594	0.691,0.823,0.681,0.681,0.86	-0.134	A3SS	chr2:59861560:59861740:59861560:59861737:59862619:59862726	206	129	278	88	335	366
863	ENSMUSG00000025006	Sorbs1	chr19	-	863	0,0,0,0,0	17,19,17,17,24	15,11,9,11,2	38,34,29,21,47	244	122	4.9758e-12	2.632e-10	0.0,0.0,0.0,0.0,0.0	0.165,0.139,0.134,0.208,0.021	-0.133	SE	chr19:40376644:40377016:40373475:40373617:40382520:40382633	0	94	48	169	94	217
6527	ENSMUSG00000004565	Pnpla6	chr8	+	6527	30,35,45,18,23	1,1,2,7,2	128,59,90,61,43	1,3,0,0,0	238	122	3.13027e-05	0.000623043	0.939,0.947,0.92,0.569,0.855	0.985,0.91,1.0,1.0,1.0	-0.133	SE	chr8:3537968:3538085:3537450:3537520:3541290:3541592	151	13	381	4	164	385
25675	ENSMUSG00000036893	Ehmt1	chr2	-	25675	333159182197245	60,16,37,40,33	230355260236258	5,16,18,20,26	244	122	2.32085e-09	9.37604e-08	0.735,0.832,0.711,0.711,0.788	0.958,0.917,0.878,0.855,0.832	-0.133	SE	chr2:24840635:24840779:24839529:24839756:24847943:24848089	1116	186	1339	85	1302	1424
38752	ENSMUSG00000059305	Vpreb1	chr16	-	38752	139112108106137	37,24,36,18,22	118195114183121	18,11,19,15,11	244	122	2.44715e-05	0.000496335	0.653,0.7,0.6,0.746,0.757	0.766,0.899,0.75,0.859,0.846	-0.133	SE	chr16:16869272:16869462:16868918:16868978:16870687:16870843	602	137	731	74	739	805
42870	ENSMUSG00000011257	Pabpc4	chr4	+	42870	157,135,92,93,131	39,43,41,38,37	74,163,122,121,77	13,29,19,12,23	208	122	0.000202058	0.0033015	0.702,0.648,0.568,0.589,0.675	0.77,0.767,0.79,0.855,0.663	-0.133	SE	chr4:123295749:123295836:123295201:123295321:123295929:123296057	608	198	557	96	806	653
1783	ENSMUSG00000027523	Gnas	chr2	+	1783	2.63827e+19	340291226225225	2.41433e+19	44,49,35,52,43	244	122	0	0	0.795,0.821,0.812,0.872,0.878	0.965,0.971,0.974,0.965,0.967	-0.133	A5SS	chr2:174328107:174330434:174328107:174328131:174334211:174334284	13566	1307	13751	223	14873	13974
5922	ENSMUSG00000015980	Lrrc27	chr7	+	5922	60,68,27,55,59	4,0,5,2,8	59,61,50,28,64	0,0,0,0,0	240	122	5.2318e-08	1.75597e-06	0.884,1.0,0.733,0.933,0.789	1.0,1.0,1.0,1.0,1.0	-0.132	SE	chr7:139236869:139236988:139230202:139230296:139238575:139238699	269	19	262	0	288	262
14249	ENSMUSG00000068394	Cep152	chr2	-	14249	55,20,29,76,72	1,0,5,3,15	50,38,64,38,79	0,0,0,0,0	244	122	3.66979e-09	1.43578e-07	0.965,1.0,0.744,0.927,0.706	1.0,1.0,1.0,1.0,1.0	-0.132	SE	chr2:125571668:125571833:125569554:125569651:125576713:125576855	252	24	269	0	276	269
16152	ENSMUSG00000019961	Tmpo	chr10	-	16152	6.80758e+19	1.08991e+15	7.46173e+19	376467577540536	241	122	0	0	0.76,0.763,0.732,0.754,0.772	0.909,0.888,0.87,0.884,0.889	-0.132	SE	chr10:91153277:91153397:91153084:91153180:91158747:91158845	30274	4928	38970	2496	35202	41466
17510	ENSMUSG00000032307	Ube2q2	chr9	+	17510	798445445470578	72,51,51,56,58	531461633547618	6,16,19,2,10	226	122	0	0	0.857,0.825,0.825,0.819,0.843	0.979,0.94,0.947,0.993,0.971	-0.132	SE	chr9:55168202:55168307:55162967:55163069:55176190:55176247	2736	288	2790	53	3024	2843
17538	ENSMUSG00000026222	Sp100	chr1	+	17538	95,79,38,61,83	14,6,20,14,10	216236262207256	18,27,9,9,16	175	122	8.01802e-05	0.00143737	0.825,0.902,0.57,0.752,0.853	0.893,0.859,0.953,0.941,0.918	-0.132	SE	chr1:85681085:85681139:85679058:85679109:85694258:85694309	356	64	1177	79	420	1256
47561	ENSMUSG00000038685	Rtel1	chr2	+	47561	94,46,85,76,56	28,11,20,22,22	109,119,111,85,134	13,18,14,16,23	238	122	0.0002281	0.00367853	0.632,0.682,0.685,0.639,0.566	0.811,0.772,0.803,0.731,0.749	-0.132	SE	chr2:181355008:181355125:181354352:181354442:181355327:181355552	357	103	558	84	460	642
21809	ENSMUSG00000039068	Zzz3	chr3	+	21809	269204215166148	42,48,23,50,31	213164200234165	13,18,13,21,20	244	122	2.37098e-06	5.94573e-05	0.762,0.68,0.824,0.624,0.705	0.891,0.82,0.885,0.848,0.805	-0.131	SE	chr3:152422617:152422771:152420014:152420140:152446798:152446937	1002	194	976	85	1196	1061
26576	ENSMUSG00000040297	Suco	chr1	-	26576	50,13,33,12,23	1,3,6,4,1	36,8,20,42,21	0,0,6,0,0	212	122	0.00345508	0.040374	0.966,0.714,0.76,0.633,0.93	1.0,1.0,0.657,1.0,1.0	-0.131	SE	chr1:161837718:161837809:161834035:161835193:161844001:161844067	131	15	127	6	146	133
32232	ENSMUSG00000053453	Thoc7	chr14	-	32232	32,62,42,31,45	46,62,37,32,38	55,62,35,55,48	21,29,27,36,37	240	122	0.00235409	0.0289675	0.261,0.337,0.366,0.33,0.376	0.571,0.521,0.397,0.437,0.397	-0.131	SE	chr14:13957061:13957180:13954538:13954656:13957553:13957631	212	215	255	150	427	405
39315	ENSMUSG00000030263	Lrmp	chr6	+	39315	3.78433e+19	670600505680733	3.56541e+19	228308291307277	244	122	0	0	0.738,0.736,0.76,0.731,0.741	0.887,0.869,0.875,0.861,0.87	-0.131	SE	chr6:145137459:145137607:145121738:145122106:145147635:145147682	18232	3188	19280	1411	21420	20691
8100	ENSMUSG00000005871	Apc	chr18	+	8100	10,18,21,31,23	0,2,3,5,1	38,45,17,24,37	0,0,0,1,0	244	122	2.0454e-05	0.000421095	1.0,0.818,0.778,0.756,0.92	1.0,1.0,1.0,0.923,1.0	-0.13	SE	chr18:34261004:34261157:34220983:34221276:34268297:34268379	103	11	161	1	114	162
9192	ENSMUSG00000028438	Kif24	chr4	-	9192	19,30,43,20,29	0,0,2,8,2	47,43,54,36,42	0,0,0,0,0	244	122	6.8483e-05	0.00124569	1.0,1.0,0.915,0.556,0.879	1.0,1.0,1.0,1.0,1.0	-0.13	SE	chr4:41413828:41414044:41409731:41409819:41423451:41423635	141	12	222	0	153	222
17006	ENSMUSG00000056763	Cspp1	chr1	+	17006	39,10,32,23,47	1,1,4,0,15	64,45,116,62,61	1,0,6,1,0	244	122	0.000151852	0.00255482	0.951,0.833,0.8,1.0,0.61	0.97,1.0,0.906,0.969,1.0	-0.13	SE	chr1:10085746:10085952:10083500:10083558:10088050:10088184	151	21	348	8	172	356
22650	ENSMUSG00000032312	Csk	chr9	-	22650	10,27,5,27,15	2,1,0,8,0	19,15,17,9,24	0,0,0,0,1	244	122	9.94842e-05	0.00174326	0.714,0.931,1.0,0.628,1.0	1.0,1.0,1.0,1.0,0.923	-0.13	SE	chr9:57652566:57652702:57631366:57631443:57653276:57653471	84	11	84	1	95	85
36966	ENSMUSG00000070972	Dnajc25	chr4	+	36966	27,18,14,22,22	55,40,43,49,65	48,55,30,24,22	51,38,56,41,23	244	122	0.000131081	0.00223859	0.197,0.184,0.14,0.183,0.145	0.32,0.42,0.211,0.226,0.324	-0.13	SE	chr4:59013631:59013855:59003192:59003557:59017669:59017822	103	252	179	209	355	388
43722	ENSMUSG00000028580	Pum1	chr4	+	43722	219113186171235	26,19,23,24,37	179176227162221	5,9,27,3,9	244	122	9.52228e-08	3.07879e-06	0.808,0.748,0.802,0.781,0.761	0.947,0.907,0.808,0.964,0.925	-0.13	SE	chr4:130730277:130730548:130701041:130701110:130741462:130741556	924	129	965	53	1053	1018
12895	ENSMUSG00000032411	Tfdp2	chr9	+	12895	62,61,68,66,80	12,12,6,4,7	68,95,92,100,79	1,2,0,2,0	169	122	3.28315e-12	1.7721e-10	0.789,0.786,0.891,0.923,0.892	0.98,0.972,1.0,0.973,1.0	-0.129	SE	chr9:96290579:96290627:96273838:96273942:96294964:96295127	337	41	434	5	378	439
31249	ENSMUSG00000027166	Dnajc24	chr2	-	31249	502369375349343	78,64,51,85,83	338484372304403	27,27,22,22,32	190	122	1.11022e-15	7.63341e-14	0.805,0.787,0.825,0.725,0.726	0.889,0.92,0.916,0.899,0.89	-0.129	SE	chr2:105970447:105970516:105966708:105967094:105980981:105981120	1938	361	1901	130	2299	2031
42456	ENSMUSG00000029001	Fbxo44	chr4	-	42456	5,0,0,1,2	46,26,41,35,35	0,6,10,10,8	6,35,16,27,18	205	122	1.08521e-08	4.00861e-07	0.061,0.0,0.0,0.017,0.033	0.0,0.093,0.271,0.181,0.209	-0.129	SE	chr4:148154157:148154241:148152802:148153644:148156145:148156281	8	183	34	102	191	136
43249	ENSMUSG00000032503	Arpp21	chr9	-	43249	41,32,19,39,39	12,1,5,2,4	28,35,27,34,48	0,3,2,0,2	221	122	0.000459159	0.00685576	0.654,0.946,0.677,0.915,0.843	1.0,0.866,0.882,1.0,0.93	-0.129	SE	chr9:112206244:112206344:112187589:112187766:112235649:112235938	170	24	172	7	194	179
37058	ENSMUSG00000002885	Adgre5	chr8	-	37058	221139102179100	199,115,86,148,109	387194230208210	147,150,118,88,134	244	122	2.79956e-05	0.000562351	0.357,0.377,0.372,0.377,0.314	0.568,0.393,0.494,0.542,0.439	-0.128	SE	chr8:83731902:83732037:83730110:83730257:83733413:83733566	741	657	1229	637	1398	1866
37901	ENSMUSG00000002109	Ddb2	chr2	-	37901	30,38,36,55,37	78,94,61,69,78	52,56,30,53,46	30,48,66,53,54	221	122	0.0016048	0.0207178	0.175,0.182,0.246,0.306,0.208	0.489,0.392,0.201,0.356,0.32	-0.128	SE	chr2:91217306:91217406:91212449:91212614:91234107:91235331	196	380	237	251	576	488
37981	ENSMUSG00000041623	D11Wsu47e	chr11	+	37981	119,96,90,132,139	41,14,16,5,14	118,114,142,95,135	3,8,6,9,4	226	122	2.36248e-05	0.000480144	0.61,0.787,0.752,0.934,0.843	0.955,0.885,0.927,0.851,0.948	-0.128	SE	chr11:113691728:113691833:113687773:113689221:113692394:113692502	576	90	604	30	666	634
42843	ENSMUSG00000069094	Pde7a	chr3	-	42843	75,83,81,75,93	25,8,8,16,21	92,81,92,81,118	14,9,2,7,6	244	122	0.00090884	0.0125826	0.6,0.838,0.835,0.701,0.689	0.767,0.818,0.958,0.853,0.908	-0.128	SE	chr3:19243049:19243201:19236443:19236539:19256777:19256861	407	78	464	38	485	502
1768	ENSMUSG00000005417	Mprip	chr11	+	1768	15,3,0,2,3	114,90,99,121,131	26,40,23,34,32	74,96,107,82,92	244	122	0	0	0.062,0.016,0.0,0.008,0.011	0.149,0.172,0.097,0.172,0.148	-0.128	A5SS	chr11:59737071:59737582:59737071:59737228:59741119:59741261	23	555	155	451	578	606
18	ENSMUSG00000025583	Rptor	chr11	+	18	17,35,22,29,20	53,19,60,44,54	54,42,44,64,45	39,40,49,40,50	244	122	0.00236954	0.0200446	0.138,0.479,0.155,0.248,0.156	0.409,0.344,0.31,0.444,0.31	-0.128	RI	chr11:119894255:119895005:119894255:119894383:119894918:119895005	123	230	249	218	353	467
19835	ENSMUSG00000033111	3830406C13Rik	chr14	+	19835	53,55,43,42,35	10,2,5,2,5	118105134107119	0,2,2,1,1	202	122	1.86518e-09	7.64415e-08	0.762,0.943,0.839,0.927,0.809	1.0,0.969,0.976,0.985,0.986	-0.127	SE	chr14:12285387:12285468:12284221:12284257:12287269:12287393	228	24	583	6	252	589
986	ENSMUSG00000005763	Cd247	chr1	+	986	2,18,15,14,20	1,0,0,5,5	6,24,6,27,13	0,1,0,4,0	124	122	0.00436615	0.0476165	0.663,1.0,1.0,0.734,0.797	1.0,0.959,1.0,0.869,1.0	-0.127	A3SS	chr1:165858442:165858478:165858445:165858478:165857415:165857496	69	11	76	5	80	81
26736	ENSMUSG00000026790	Odf2	chr2	+	26736	453222322358398	128,62,48,93,114	402380449442458	53,67,52,39,63	244	122	4.63584e-08	1.56655e-06	0.639,0.642,0.77,0.658,0.636	0.791,0.739,0.812,0.85,0.784	-0.126	SE	chr2:29893000:29893154:29892185:29892276:29893443:29893512	1753	445	2131	274	2198	2405
39320	ENSMUSG00000030263	Lrmp	chr6	+	39320	3.2453e+19	670600505680733	3.04036e+19	228308291307277	203	122	0	0	0.744,0.75,0.774,0.754,0.737	0.889,0.876,0.882,0.87,0.874	-0.126	SE	chr6:145138181:145138263:145121738:145122106:145147635:145147682	16002	3188	16909	1411	19190	18320
1416	ENSMUSG00000035325	Sec31a	chr5	-	1416	221172185195167	164171142173168	189272315217243	93136190118120	166	122	6.69288e-08	3.2481e-06	0.498,0.425,0.489,0.453,0.422	0.599,0.595,0.549,0.575,0.598	-0.126	A5SS	chr5:100373379:100373715:100373424:100373715:100368293:100368352	940	818	1236	657	1758	1893
823	ENSMUSG00000003038	Hmgn2	chr4	-	823	341303211273251	133172115182129	431449420507309	128141142124127	244	122	8.02158e-07	2.74621e-05	0.562,0.468,0.478,0.429,0.493	0.627,0.614,0.597,0.672,0.549	-0.126	RI	chr4:133966428:133966795:133966428:133966479:133966759:133966795	1379	731	2116	662	2110	2778
5411	ENSMUSG00000020107	Anapc16	chr10	-	5411	9,14,12,19,13	66,61,53,60,67	18,21,20,17,31	45,38,44,51,40	171	122	3.61359e-05	0.000706895	0.089,0.141,0.139,0.184,0.122	0.222,0.283,0.245,0.192,0.356	-0.125	SE	chr10:60002417:60002467:59990832:59990907:60002955:60002995	67	307	107	218	374	325
18490	ENSMUSG00000048874	Phf3	chr1	-	18490	80,93,49,50,82	7,6,8,3,23	85,63,103,79,70	0,4,4,0,7	244	122	5.58935e-05	0.00103957	0.851,0.886,0.754,0.893,0.641	1.0,0.887,0.928,1.0,0.833	-0.125	SE	chr1:30862986:30863255:30837104:30837266:30873577:30873581	354	47	400	15	401	415
20593	ENSMUSG00000028944	Prkag2	chr5	-	20593	15,18,20,19,41	12,4,0,0,9	12,15,34,27,28	5,0,0,0,0	167	122	0.0001698	0.00282801	0.477,0.767,1.0,1.0,0.769	0.637,1.0,1.0,1.0,1.0	-0.125	SE	chr5:24876988:24877034:24871493:24871659:24878704:24878763	113	25	116	5	138	121
21851	ENSMUSG00000021012	Zc3h14	chr12	+	21851	1.1811e+18	181184184143164	9.51115e+17	36,79,76,64,51	196	122	0	0	0.802,0.773,0.758,0.815,0.795	0.943,0.901,0.893,0.908,0.924	-0.125	SE	chr12:98774244:98774319:98763822:98763978:98783581:98783702	5145	856	5132	306	6001	5438
26330	ENSMUSG00000039298	Cdk5rap2	chr4	-	26330	33,39,25,38,38	10,0,3,6,5	133,52,69,100,126	2,4,3,8,1	244	122	0.000809553	0.0113526	0.623,1.0,0.806,0.76,0.792	0.971,0.867,0.92,0.862,0.984	-0.125	SE	chr4:70337340:70337559:70317426:70317597:70349143:70349245	173	24	480	18	197	498
26523	ENSMUSG00000040483	Xaf1	chr11	+	26523	264227141190193	151,126,94,132,118	242235248312206	98,107,105,111,53	244	122	9.52936e-06	0.000210729	0.466,0.474,0.429,0.419,0.45	0.553,0.523,0.541,0.584,0.66	-0.125	SE	chr11:72304665:72304861:72303326:72303462:72308606:72308924	1015	621	1243	474	1636	1717
39471	ENSMUSG00000039662	Icmt	chr4	+	39471	9,4,7,10,32	55,17,35,35,42	9,12,22,7,16	17,21,28,14,14	230	122	0.00274815	0.0331583	0.08,0.111,0.096,0.132,0.288	0.219,0.233,0.294,0.21,0.377	-0.125	SE	chr4:152299136:152299245:152298684:152298773:152299670:152299840	62	184	66	94	246	160
39845	ENSMUSG00000045427	Hnrnph2	chrX	+	39845	326292258237296	530553453480460	367476341358382	334363488349439	166	122	2.13469e-08	7.56813e-07	0.311,0.28,0.295,0.266,0.321	0.447,0.491,0.339,0.43,0.39	-0.125	SE	chrX:134602917:134602962:134602691:134602762:134604854:134606384	1409	2476	1924	1973	3885	3897
3313	ENSMUSG00000036928	Stag3	chr5	+	3313	17,3,7,9,0	21,24,14,38,39	25,4,8,11,12	12,9,25,28,15	244	122	0.00625119	0.0421087	0.288,0.059,0.2,0.106,0.0	0.51,0.182,0.138,0.164,0.286	-0.125	RI	chr5:138296701:138297425:138296701:138296825:138297326:138297425	36	136	60	89	172	149
14509	ENSMUSG00000066568	Lsm14a	chr7	-	14509	1.55014e+19	369292337383424	1.43614e+19	153217208219226	244	122	1.11022e-16	7.92172e-15	0.677,0.704,0.643,0.648,0.641	0.824,0.758,0.796,0.786,0.77	-0.124	SE	chr7:34357765:34357942:34357433:34357496:34365614:34365737	7074	1805	7541	1023	8879	8564
46740	ENSMUSG00000027620	Rbm39	chr2	-	46740	54,51,44,50,42	10,10,10,11,13	68,114,68,73,87	4,12,6,14,7	193	122	0.00109315	0.0147759	0.773,0.763,0.736,0.742,0.671	0.915,0.857,0.878,0.767,0.887	-0.124	SE	chr2:156174096:156174168:156172827:156173022:156176402:156176457	241	54	410	43	295	453
4666	ENSMUSG00000032946	Rasgrp2	chr19	+	4666	161134110142130	196132133138168	124147107120106	90,86,81,70,83	160	122	9.99227e-07	4.37106e-05	0.385,0.436,0.387,0.44,0.371	0.512,0.566,0.502,0.567,0.493	-0.124	A3SS	chr19:6402991:6403086:6403030:6403086:6401720:6401863	677	767	604	410	1444	1014
3673	ENSMUSG00000030780	BC017158	chr7	-	3673	16,8,16,23,14	4,0,4,2,0	53,21,28,26,28	2,0,2,0,0	244	122	0.000141902	0.00208553	0.667,1.0,0.667,0.852,1.0	0.93,1.0,0.875,1.0,1.0	-0.124	RI	chr7:128274632:128276143:128274632:128274723:128276085:128276143	77	10	156	4	87	160
18878	ENSMUSG00000006611	Hfe	chr13	-	18878	48,40,41,52,64	9,4,2,8,2	59,118,118,75,75	0,1,0,3,5	244	122	5.62319e-06	0.000130841	0.727,0.833,0.911,0.765,0.941	1.0,0.983,1.0,0.926,0.882	-0.123	SE	chr13:23708027:23708291:23706766:23707066:23710626:23710854	245	25	445	9	270	454
20510	ENSMUSG00000019790	Stxbp5	chr10	-	20510	59,15,28,19,21	8,6,5,0,1	27,19,38,14,50	3,0,1,0,0	172	122	7.27162e-06	0.000165318	0.84,0.639,0.799,1.0,0.937	0.865,1.0,0.964,1.0,1.0	-0.123	SE	chr10:9778020:9778071:9770449:9770689:9789362:9789428	142	20	148	4	162	152
35057	ENSMUSG00000037722	Gnpnat1	chr14	-	35057	185137191119137	13,4,23,15,17	95114137134129	1,2,0,0,0	201	122	0	0	0.896,0.954,0.834,0.828,0.83	0.983,0.972,1.0,1.0,1.0	-0.123	SE	chr14:45380936:45381016:45378163:45378486:45381555:45381683	769	72	609	3	841	612
38492	ENSMUSG00000024989	Cep55	chr19	+	38492	144,94,104,145,141	26,19,7,5,13	143142163164160	2,12,5,4,0	244	122	4.31913e-07	1.25255e-05	0.735,0.712,0.881,0.935,0.844	0.973,0.855,0.942,0.953,1.0	-0.123	SE	chr19:38057409:38057566:38055041:38055317:38057788:38057983	628	70	772	23	698	795
38594	ENSMUSG00000036768	Kif15	chr9	+	38594	10,18,19,21,16	1,0,5,5,4	10,19,12,13,14	0,1,1,3,0	244	122	0.00208563	0.0260849	0.833,1.0,0.655,0.677,0.667	1.0,0.905,0.857,0.684,1.0	-0.123	SE	chr9:122959806:122959990:122951045:122951152:122965948:122965986	84	15	68	5	99	73
9450	ENSMUSG00000020376	Rnf130	chr11	+	9450	1.63412e+18	266203202210217	1.26516e+19	110,162,136,88,136	215	122	0	0	0.777,0.766,0.721,0.731,0.739	0.867,0.845,0.869,0.901,0.864	-0.122	SE	chr11:50099245:50099339:50095775:50095980:50104548:50104753	5814	1098	7351	632	6912	7983
19759	ENSMUSG00000090626	Tex9	chr9	-	19759	153,92,109,115,144	27,22,29,23,37	119200161133135	8,15,6,19,35	204	122	9.73059e-05	0.00171189	0.772,0.714,0.692,0.749,0.699	0.899,0.889,0.941,0.807,0.698	-0.122	SE	chr9:72482446:72482529:72479923:72480775:72484068:72484114	613	138	748	83	751	831
28633	ENSMUSG00000028689	Ccdc163	chr4	+	28633	13,10,9,19,12	0,2,3,5,0	34,42,24,42,28	4,0,0,0,0	152	122	0.00108165	0.0146404	1.0,0.801,0.707,0.753,1.0	0.872,1.0,1.0,1.0,1.0	-0.122	SE	chr4:116709242:116709273:116708928:116709094:116709437:116709619	63	10	170	4	73	174
32733	ENSMUSG00000028163	Nfkb1	chr3	-	32733	648718641731699	73,92,102,90,79	604914759906831	29,38,43,35,27	244	122	0	0	0.816,0.796,0.759,0.802,0.816	0.912,0.923,0.898,0.928,0.939	-0.122	SE	chr3:135589326:135589504:135584654:135585515:135590315:135590488	3437	436	4014	172	3873	4186
2562	ENSMUSG00000061904	Slc25a3	chr10	-	2562	34,27,37,43,40	7,4,2,7,5	41,34,35,50,45	4,0,1,2,3	220	122	0.00132998	0.0167708	0.729,0.789,0.911,0.773,0.816	0.85,1.0,0.951,0.933,0.893	-0.122	A5SS	chr10:91122107:91122331:91122206:91122331:91119526:91119706	181	25	205	10	206	215
3412	ENSMUSG00000042404	Dennd4b	chr3	+	3412	0,0,2,3,0	35,16,39,31,37	2,10,2,5,2	28,19,31,16,33	128	122	8.75167e-06	0.000253799	0.0,0.0,0.047,0.084,0.0	0.064,0.334,0.058,0.229,0.055	-0.122	A5SS	chr3:90270054:90270128:90270054:90270121:90270212:90270271	5	158	21	127	163	148
7223	ENSMUSG00000079179	Rab10os	chr12	+	7223	139,87,104,92,107	25,16,20,16,15	69,129,54,86,59	6,2,7,3,6	208	122	3.3707e-06	8.20887e-05	0.765,0.761,0.753,0.771,0.807	0.871,0.974,0.819,0.944,0.852	-0.121	SE	chr12:3247351:3247438:3241521:3241578:3249866:3250376	529	92	397	24	621	421
26924	ENSMUSG00000030336	Cd27	chr6	-	26924	57,37,32,38,52	6,2,10,0,0	51,43,61,110,50	0,0,0,3,0	244	122	3.12794e-06	7.67419e-05	0.826,0.902,0.615,1.0,1.0	1.0,1.0,1.0,0.948,1.0	-0.121	SE	chr6:125236472:125236604:125234253:125234316:125236756:125236994	216	18	315	3	234	318
31731	ENSMUSG00000013846	St3gal1	chr15	-	31731	5,0,0,0,0	40,4,21,28,14	0,5,4,9,7	17,15,25,21,20	186	122	1.67736e-06	4.32948e-05	0.076,0.0,0.0,0.0,0.0	0.0,0.179,0.095,0.219,0.187	-0.121	SE	chr15:67162986:67163051:67153042:67153170:67176631:67176712	5	107	25	98	112	123
37519	ENSMUSG00000049327	Kmt5a	chr5	+	37519	152,100,96,110,131	291221286235314	137131151136141	114190206165163	237	122	2.10836e-10	9.46184e-09	0.212,0.189,0.147,0.194,0.177	0.382,0.262,0.274,0.298,0.308	-0.121	SE	chr5:124445968:124446084:124445504:124445728:124447213:124447370	589	1347	696	838	1936	1534
40887	ENSMUSG00000015120	Ube2i	chr17	-	40887	155125126143128	124,82,92,81,77	138150224144132	44,97,72,58,56	244	122	0.00027288	0.00432381	0.385,0.433,0.406,0.469,0.454	0.611,0.436,0.609,0.554,0.541	-0.121	SE	chr17:25272537:25272765:25269402:25269479:25273481:25273600	677	456	788	327	1133	1115
6714	ENSMUSG00000021596	Mctp1	chr13	+	6714	11,8,8,1,0	36,34,26,35,35	15,28,17,19,34	64,36,92,47,71	160	122	0.00118286	0.0158589	0.189,0.152,0.19,0.021,0.0	0.152,0.372,0.123,0.236,0.267	-0.12	SE	chr13:76731770:76731809:76723667:76723779:76756985:76757156	28	166	113	310	194	423
26572	ENSMUSG00000041815	Poldip3	chr15	-	26572	866554529672675	132145156151187	686872890697807	85,103,114,80,93	208	122	1.40618e-11	7.07044e-10	0.794,0.691,0.665,0.723,0.679	0.826,0.832,0.821,0.836,0.836	-0.12	SE	chr15:83137467:83137554:83135293:83135389:83138131:83138522	3296	771	3952	475	4067	4427
43029	ENSMUSG00000032175	Tyk2	chr9	-	43029	59,22,43,57,57	0,6,0,4,7	38,37,52,30,63	0,0,0,0,0	209	122	8.88795e-07	2.45716e-05	1.0,0.682,1.0,0.893,0.826	1.0,1.0,1.0,1.0,1.0	-0.12	SE	chr9:21115191:21115279:21111244:21111380:21115371:21115548	238	17	220	0	255	220
2604	ENSMUSG00000001017	Chtop	chr3	-	2604	174,105,77,112,139	8,7,7,12,5	130117104160158	0,0,0,0,0	244	122	3.91909e-14	4.052e-12	0.916,0.882,0.846,0.824,0.933	1.0,1.0,1.0,1.0,1.0	-0.12	A5SS	chr3:90506107:90507626:90507544:90507626:90498955:90500107	607	39	669	0	646	669
2260	ENSMUSG00000024911	Fibp	chr19	+	2260	113,72,57,111,92	180169209217222	138126119102138	125175149115164	244	122	4.00386e-10	3.32892e-08	0.239,0.176,0.12,0.204,0.172	0.356,0.265,0.285,0.307,0.296	-0.12	RI	chr19:5463786:5464215:5463786:5463850:5464128:5464215	445	997	623	728	1442	1351
333	ENSMUSG00000038187	Btbd10	chr7	-	333	212136127150148	112,96,65,114,88	201206200158192	79,41,61,99,94	244	122	0.00358238	0.0417019	0.486,0.415,0.494,0.397,0.457	0.56,0.715,0.621,0.444,0.505	-0.119	SE	chr7:113351780:113351938:113335321:113335518:113364904:113364969	773	475	957	374	1248	1331
15977	ENSMUSG00000038773	Kdm3b	chr18	+	15977	97,31,29,64,69	10,1,8,3,13	90,36,83,58,76	6,2,0,0,6	244	122	0.000947137	0.0130467	0.829,0.939,0.644,0.914,0.726	0.882,0.9,1.0,1.0,0.864	-0.119	SE	chr18:34803449:34804049:34799284:34799359:34808240:34809489	290	35	343	14	325	357
35587	ENSMUSG00000033697	Arhgap39	chr15	-	35587	39,27,38,19,26	10,6,1,1,6	7,7,31,29,13	1,0,0,0,2	214	122	2.50052e-06	6.254e-05	0.69,0.72,0.956,0.915,0.712	0.8,1.0,1.0,1.0,0.787	-0.119	SE	chr15:76730363:76730456:76727402:76727476:76734876:76735438	149	24	87	3	173	90
3589	ENSMUSG00000028689	Ccdc163	chr4	+	3589	5,2,2,6,15	45,22,16,23,32	16,33,26,24,11	40,74,49,42,51	146	122	0.00302572	0.0367366	0.085,0.071,0.095,0.179,0.281	0.251,0.271,0.307,0.323,0.153	-0.119	A3SS	chr4:116711285:116711378:116711310:116711378:116710100:116710284	30	138	110	256	168	366
12508	ENSMUSG00000048930	Tada3	chr6	-	12508	19,33,11,26,28	1,0,7,0,4	27,39,28,16,15	0,0,3,0,0	179	122	0.000318041	0.00494991	0.928,1.0,0.517,1.0,0.827	1.0,1.0,0.864,1.0,1.0	-0.118	SE	chr6:113377315:113377373:113376891:113376945:113377489:113377756	117	12	125	3	129	128
17012	ENSMUSG00000056763	Cspp1	chr1	+	17012	24,19,13,12,19	0,0,0,2,10	27,36,34,30,42	0,0,0,3,0	239	122	0.00127341	0.0168621	1.0,1.0,1.0,0.754,0.492	1.0,1.0,1.0,0.836,1.0	-0.118	SE	chr1:10116613:10116731:10113602:10113707:10126339:10126479	87	12	169	3	99	172
44762	ENSMUSG00000024182	Axin1	chr17	+	44762	122,81,123,134,136	295162157221299	154154160162165	176210222123119	229	122	4.52043e-06	0.000107193	0.181,0.21,0.294,0.244,0.195	0.318,0.281,0.277,0.412,0.425	-0.118	SE	chr17:26192515:26192623:26189985:26190231:26193938:26194106	596	1134	795	850	1730	1645
13017	ENSMUSG00000020528	Prpsap2	chr11	-	13017	141,121,117,95,76	82,76,66,79,89	58,96,91,83,68	25,40,38,36,39	217	122	0.00175005	0.0223528	0.492,0.472,0.499,0.403,0.324	0.566,0.574,0.574,0.564,0.495	-0.117	SE	chr11:61756581:61756677:61756194:61756345:61761953:61762012	550	392	396	178	942	574
17517	ENSMUSG00000029084	Cd38	chr5	+	17517	143,93,50,34,61	3,6,0,6,13	188137259100145	0,1,0,0,0	195	122	2.26621e-11	1.10994e-09	0.968,0.907,1.0,0.78,0.746	1.0,0.988,1.0,1.0,1.0	-0.117	SE	chr5:43906163:43906237:43903594:43903680:43907512:43907605	381	28	829	1	409	830
23729	ENSMUSG00000024127	Prepl	chr17	-	23729	81,53,91,55,103	7,13,26,13,28	61148109161115	6,11,23,12,15	244	122	0.00268332	0.0324353	0.853,0.671,0.636,0.679,0.648	0.836,0.871,0.703,0.87,0.793	-0.117	SE	chr17:85088339:85088875:85083192:85083315:85090105:85090267	383	87	594	67	470	661
34204	ENSMUSG00000054836	Elp6	chr9	+	34204	546323307390275	27,67,46,28,122	280452408326286	26,0,6,73,21	244	122	0.000633422	0.00914784	0.91,0.707,0.769,0.874,0.53	0.843,1.0,0.971,0.691,0.872	-0.117	SE	chr9:110319569:110319716:110315750:110315952:110320814:110321323	1841	290	1752	126	2131	1878
40202	ENSMUSG00000020694	Tlk2	chr11	+	40202	171,121,97,159,147	37,23,24,34,26	179173146138170	6,24,12,25,16	217	122	4.05283e-05	0.000780697	0.722,0.747,0.694,0.724,0.761	0.944,0.802,0.872,0.756,0.857	-0.117	SE	chr11:105210544:105210640:105209793:105209837:105221185:105221353	695	144	806	83	839	889
40612	ENSMUSG00000016487	Ppfibp1	chr6	+	40612	0,0,0,0,0	50,31,18,24,35	1,4,3,6,0	25,21,46,8,28	154	122	0.000142433	0.00241479	0.0,0.0,0.0,0.0,0.0	0.031,0.131,0.049,0.373,0.0	-0.117	SE	chr6:147016860:147016893:147016221:147016393:147019033:147019181	0	158	14	128	158	142
43648	ENSMUSG00000036561	Ppp6r2	chr15	+	43648	71,47,54,62,71	7,11,10,10,4	44,50,49,94,66	5,0,6,1,1	204	122	8.261e-05	0.0014756	0.858,0.719,0.764,0.788,0.914	0.84,1.0,0.83,0.983,0.975	-0.117	SE	chr15:89246257:89246340:89243304:89243459:89253018:89253250	305	42	303	13	347	316
3176	ENSMUSG00000029705	Cux1	chr5	-	3176	61,15,62,56,54	15,2,17,6,5	57,29,71,29,61	1,7,4,1,4	244	122	0.00244089	0.0313022	0.67,0.789,0.646,0.824,0.844	0.966,0.674,0.899,0.935,0.884	-0.117	A3SS	chr5:136312642:136313314:136312642:136313008:136314306:136314403	248	45	247	17	293	264
650	ENSMUSG00000000838	Fmr1	chrX	+	650	278142174143209	276109226179167	237124284230290	204,55,220,125,168	184	122	0.000489521	0.00726807	0.4,0.463,0.338,0.346,0.453	0.435,0.599,0.461,0.55,0.534	-0.116	SE	chrX:68705860:68705923:68705248:68705380:68708041:68708128	946	957	1165	772	1903	1937
4890	ENSMUSG00000036435	Exoc1	chr5	+	4890	1,1,4,3,8	175142134146178	8,38,36,29,34	109102176133180	166	122	0	0	0.004,0.005,0.021,0.015,0.032	0.051,0.215,0.131,0.138,0.122	-0.116	SE	chr5:76557818:76557863:76554099:76554205:76559003:76559167	17	775	145	700	792	845
19832	ENSMUSG00000033111	3830406C13Rik	chr14	+	19832	56,61,47,52,43	10,2,5,2,5	118107151111129	0,2,2,1,1	205	122	4.71636e-09	1.8113e-07	0.769,0.948,0.848,0.939,0.837	1.0,0.97,0.978,0.985,0.987	-0.116	SE	chr14:12285384:12285468:12284172:12284257:12287269:12287381	259	24	616	6	283	622
27431	ENSMUSG00000024845	Tmem134	chr19	+	27431	701742546717747	447386327372426	6.85115e+15	232384317285249	166	122	5.07195e-11	2.42427e-09	0.535,0.586,0.551,0.586,0.563	0.685,0.687,0.644,0.706,0.679	-0.116	SE	chr19:4131030:4131075:4127549:4127836:4131228:4131257	3453	1958	4260	1467	5411	5727
28681	ENSMUSG00000061533	Cep128	chr12	-	28681	97,59,86,85,73	4,8,8,3,6	133,74,131,91,145	0,3,0,0,0	244	122	1.26934e-10	5.83513e-09	0.924,0.787,0.843,0.934,0.859	1.0,0.925,1.0,1.0,1.0	-0.116	SE	chr12:91366342:91366504:91348749:91348876:91370061:91370196	400	29	574	3	429	577
38456	ENSMUSG00000025816	Sec61a2	chr2	-	38456	15,8,6,6,11	117,46,93,46,72	6,19,14,26,18	48,38,51,33,49	205	122	1.78737e-06	4.59252e-05	0.071,0.094,0.037,0.072,0.083	0.069,0.229,0.14,0.319,0.179	-0.116	SE	chr2:5879616:5879700:5877854:5878008:5882580:5882690	46	374	83	219	420	302
45538	ENSMUSG00000030990	Pgap2	chr7	+	45538	181134145129174	23,27,28,21,15	138148134169135	8,7,16,12,4	233	122	1.04189e-05	0.000228112	0.805,0.722,0.731,0.763,0.859	0.9,0.917,0.814,0.881,0.946	-0.116	SE	chr7:102223378:102223490:102223027:102223150:102226270:102226445	763	114	724	47	877	771
46678	ENSMUSG00000038671	Arfrp1	chr2	-	46678	849665728689809	177130104102130	573694876663752	32,54,69,41,46	192	122	0	0	0.753,0.765,0.816,0.811,0.798	0.919,0.891,0.89,0.911,0.912	-0.116	SE	chr2:181361000:181361071:181359638:181359739:181361390:181361472	3740	643	3558	242	4383	3800
2768	ENSMUSG00000021275	Tecpr2	chr12	+	2768	27,15,5,16,32	7,1,3,0,7	4,4,7,5,6	2,0,0,0,0	153	122	2.96026e-05	0.00085695	0.755,0.923,0.571,1.0,0.785	0.615,1.0,1.0,1.0,1.0	-0.116	A3SS	chr12:110926163:110926476:110926195:110926476:110918868:110919026	95	18	26	2	113	28
5287	ENSMUSG00000036503	Rnf13	chr3	+	5287	8,15,4,18,2	51,26,50,39,23	13,9,34,16,7	14,21,33,34,25	244	122	0.000784762	0.0128734	0.073,0.224,0.038,0.188,0.042	0.317,0.176,0.34,0.19,0.123	-0.116	A3SS	chr3:57801717:57802537:57802446:57802537:57796197:57796295	47	189	79	127	236	206
15666	ENSMUSG00000029165	Agbl5	chr5	+	15666	48,51,54,63,77	15,4,4,8,14	66,53,46,54,43	4,0,5,1,1	168	122	1.23895e-05	0.000266983	0.699,0.903,0.907,0.851,0.8	0.923,1.0,0.87,0.975,0.969	-0.115	SE	chr5:30905108:30905155:30904702:30904815:30905630:30905667	293	45	262	11	338	273
25191	ENSMUSG00000044367	Slc16a13	chr11	-	25191	43,64,59,53,68	1,8,22,5,14	36,41,100,74,18	3,3,0,1,3	244	122	4.27715e-05	0.000818538	0.956,0.8,0.573,0.841,0.708	0.857,0.872,1.0,0.974,0.75	-0.115	SE	chr11:70220194:70220338:70218592:70219330:70220478:70220994	287	50	269	10	337	279
42810	ENSMUSG00000013150	Gfod2	chr8	-	42810	17,4,0,13,7	50,64,45,44,37	15,21,30,10,12	25,58,33,40,32	244	122	1.65346e-05	0.000345971	0.145,0.03,0.0,0.129,0.086	0.231,0.153,0.313,0.111,0.158	-0.115	SE	chr8:105722848:105723044:105717416:105717650:105727987:105728331	41	240	88	188	281	276
43114	ENSMUSG00000035901	Dennd5a	chr7	-	43114	65,29,32,52,49	3,7,3,2,3	70,25,51,41,64	2,0,0,0,0	193	122	9.64131e-07	2.64699e-05	0.932,0.724,0.871,0.943,0.912	0.957,1.0,1.0,1.0,1.0	-0.115	SE	chr7:109935481:109935553:109934692:109934802:109960073:109960470	227	18	251	2	245	253
1457	ENSMUSG00000031381	Piga	chrX	+	1457	32,22,19,22,43	3,5,2,3,3	45,13,38,16,25	0,0,1,1,4	244	122	0.00336566	0.0346473	0.842,0.688,0.826,0.786,0.878	1.0,1.0,0.95,0.889,0.758	-0.115	A5SS	chrX:164422583:164423672:164422583:164422664:164427931:164428064	138	16	137	6	154	143
4469	ENSMUSG00000018999	Slc35b4	chr6	-	4469	14,26,30,35,26	95,116,77,80,147	46,63,25,39,39	65,74,90,51,77	244	122	8.16585e-07	2.27019e-05	0.069,0.101,0.163,0.179,0.081	0.261,0.299,0.122,0.277,0.202	-0.114	SE	chr6:34172627:34172755:34170460:34170574:34176777:34177082	131	515	212	357	646	569
36012	ENSMUSG00000048234	Rnf149	chr1	-	36012	159237237209234	23,54,31,31,17	313325281407271	14,2,30,25,16	218	122	1.18288e-08	4.35318e-07	0.795,0.711,0.811,0.79,0.885	0.926,0.989,0.84,0.901,0.905	-0.114	SE	chr1:39558314:39558411:39555477:39555670:39560692:39560775	1076	156	1597	87	1232	1684
36539	ENSMUSG00000029428	Stx2	chr5	-	36539	203,159,98,192,126	25,32,8,13,26	139194195207179	6,10,12,12,8	244	122	5.33496e-06	0.000124719	0.802,0.713,0.86,0.881,0.708	0.921,0.907,0.89,0.896,0.918	-0.114	SE	chr5:128987717:128987842:128984556:128986430:128988801:128988912	778	104	914	48	882	962
1150	ENSMUSG00000053477	Tcf4	chr18	+	1150	91,63,55,87,83	42,24,16,27,25	137146121145137	37,12,22,21,25	124	122	7.21416e-06	0.00025864	0.681,0.721,0.772,0.76,0.766	0.785,0.923,0.844,0.872,0.844	-0.114	A3SS	chr18:69564033:69564163:69564036:69564163:69519964:69520026	379	134	686	117	513	803
20446	ENSMUSG00000045411	2410002F23Rik	chr7	+	20446	278228187165164	107,84,95,96,102	176222276201195	68,62,81,52,61	244	122	0.000139765	0.00237463	0.565,0.576,0.496,0.462,0.446	0.564,0.642,0.63,0.659,0.615	-0.113	SE	chr7:44247909:44248059:44247230:44247416:44248251:44248295	1022	484	1070	324	1506	1394
37944	ENSMUSG00000028621	Cyb5rl	chr4	+	37944	112,92,108,92,114	10,18,14,20,18	50,121,115,89,132	1,8,18,7,4	226	122	0.000756506	0.0106691	0.858,0.734,0.806,0.713,0.774	0.964,0.891,0.775,0.873,0.947	-0.113	SE	chr4:107077675:107077780:107073872:107073960:107080890:107081094	518	80	507	38	598	545
3152	ENSMUSG00000021185	Dglucy	chr12	+	3152	232228173255235	23,14,17,28,36	121,155,167,95,153	6,3,4,3,5	244	122	3.86559e-09	1.50202e-07	0.835,0.891,0.836,0.82,0.765	0.91,0.963,0.954,0.941,0.939	-0.112	SE	chr12:100835184:100835335:100829598:100829725:100838499:100838698	1123	118	691	21	1241	712
5773	ENSMUSG00000029267	Mtf2	chr5	+	5773	103,89,97,108,119	19,24,21,10,19	82,82,75,90,86	5,13,1,11,10	244	122	0.00418119	0.0476245	0.73,0.65,0.698,0.844,0.758	0.891,0.759,0.974,0.804,0.811	-0.112	SE	chr5:108073306:108073454:108065673:108065965:108078865:108078974	516	93	415	40	609	455
37905	ENSMUSG00000002109	Ddb2	chr2	-	37905	123,196,96,145,179	40,44,49,69,42	190332262282314	61,65,34,59,62	244	122	0.00435403	0.0492678	0.606,0.69,0.495,0.512,0.681	0.609,0.719,0.794,0.705,0.717	-0.112	SE	chr2:91218743:91218889:91217306:91217406:91234107:91234299	739	244	1380	281	983	1661
47482	ENSMUSG00000024505	Dtwd2	chr18	-	47482	99,65,109,74,53	6,6,0,9,18	43,71,94,80,75	1,3,2,1,5	244	122	0.000958069	0.0131791	0.892,0.844,1.0,0.804,0.596	0.956,0.922,0.959,0.976,0.882	-0.112	SE	chr18:49723621:49723814:49700258:49700387:49724112:49724207	400	39	363	12	439	375
1802	ENSMUSG00000024962	Vegfb	chr19	-	1802	142,110,88,108,143	106,75,89,82,140	81122103117113	44,82,65,42,53	222	122	0.00077557	0.0127943	0.424,0.446,0.352,0.42,0.36	0.503,0.45,0.465,0.605,0.54	-0.112	A3SS	chr19:6985360:6985596:6985360:6985495:6985804:6985840	591	492	536	286	1083	822
5367	ENSMUSG00000038866	Zcchc2	chr1	+	5367	76,54,57,39,54	5,4,9,10,14	70,39,40,40,59	1,4,2,4,2	193	122	0.000309978	0.00484342	0.906,0.895,0.8,0.711,0.709	0.978,0.86,0.927,0.863,0.949	-0.111	SE	chr1:106006014:106006086:106004099:106004176:106011701:106011814	280	42	248	13	322	261
8908	ENSMUSG00000056268	Dennd1b	chr1	+	8908	0,0,1,4,1	25,20,22,30,17	8,8,3,11,5	37,16,35,35,31	181	122	2.8432e-06	7.02776e-05	0.0,0.0,0.03,0.082,0.038	0.127,0.252,0.055,0.175,0.098	-0.111	SE	chr1:139059066:139059126:139054540:139054621:139060274:139060328	6	114	35	154	120	189
11957	ENSMUSG00000039285	Azi2	chr9	+	11957	520378364424369	41,44,24,29,36	424575599423577	14,10,2,1,5	221	122	0	0	0.875,0.826,0.893,0.89,0.85	0.944,0.969,0.994,0.996,0.985	-0.111	SE	chr9:118049896:118049996:118049309:118049435:118051353:118051502	2055	174	2598	32	2229	2630
20513	ENSMUSG00000019790	Stxbp5	chr10	-	20513	2,1,4,0,6	51,11,24,16,13	3,16,15,1,6	17,12,30,13,37	181	122	0.00242786	0.0297187	0.026,0.058,0.101,0.0,0.237	0.106,0.473,0.252,0.049,0.099	-0.111	SE	chr10:9784340:9784400:9778020:9778071:9789362:9789428	13	115	41	109	128	150
43028	ENSMUSG00000032175	Tyk2	chr9	-	43028	104,30,48,73,68	0,6,0,4,7	48,67,95,52,77	0,0,0,0,0	244	122	1.19554e-06	3.19604e-05	1.0,0.714,1.0,0.901,0.829	1.0,1.0,1.0,1.0,1.0	-0.111	SE	chr9:21114192:21114320:21111244:21111380:21115371:21116030	323	17	339	0	340	339
43537	ENSMUSG00000071350	Setdb2	chr14	-	43537	197145143128111	15,15,6,16,13	152,174,161,83,151	5,0,3,3,4	244	122	4.44708e-09	1.71286e-07	0.868,0.829,0.923,0.8,0.81	0.938,1.0,0.964,0.933,0.95	-0.111	SE	chr14:59437436:59437765:59431142:59431268:59440586:59440875	724	65	721	15	789	736
46474	ENSMUSG00000025968	Ndufs1	chr1	-	46474	245183209123181	174129143144182	143237222199193	71106131113107	225	122	6.69027e-05	0.0012203	0.433,0.435,0.442,0.317,0.35	0.522,0.548,0.479,0.488,0.494	-0.111	SE	chr1:63172153:63172257:63170848:63170914:63176585:63176669	941	772	994	528	1713	1522
5649	ENSMUSG00000030605	Mfge8	chr7	-	5649	96,62,50,60,65	227188151165166	87,112,80,72,75	108,137,144,113,99	232	122	3.12919e-09	1.24141e-07	0.182,0.148,0.148,0.161,0.171	0.298,0.301,0.226,0.251,0.285	-0.11	SE	chr7:79143277:79143388:79142868:79143050:79145246:79145378	333	897	426	601	1230	1027
16870	ENSMUSG00000000673	Haao	chr17	-	16870	392471350349411	72,72,51,88,77	252326275335269	29,28,33,20,24	244	122	3.27924e-08	1.12538e-06	0.731,0.766,0.774,0.665,0.727	0.813,0.853,0.806,0.893,0.849	-0.11	SE	chr17:83834778:83834924:83832326:83832395:83835190:83835234	1973	360	1457	134	2333	1591
23558	ENSMUSG00000045031	Cetn4	chr3	-	23558	22,29,17,18,24	1,3,0,0,5	18,37,32,19,38	0,0,0,0,0	244	122	0.00402885	0.0461543	0.917,0.829,1.0,1.0,0.706	1.0,1.0,1.0,1.0,1.0	-0.11	SE	chr3:37309936:37310065:37308759:37309181:37310292:37310439	110	9	144	0	119	144
14912	ENSMUSG00000020453	Patz1	chr11	+	14912	97,47,78,104,105	176115120141116	140,126,165,69,113	106113108137117	194	122	0.00405614	0.0463733	0.257,0.204,0.29,0.317,0.363	0.454,0.412,0.49,0.241,0.378	-0.109	SE	chr11:3306287:3306360:3299033:3299205:3307647:3309083	431	668	613	581	1099	1194
24451	ENSMUSG00000032534	Cep63	chr9	-	24451	409455448390366	52,25,7,20,32	432533596452496	3,0,0,0,0	235	122	0	0	0.803,0.904,0.971,0.91,0.856	0.987,1.0,1.0,1.0,1.0	-0.109	SE	chr9:102607325:102607439:102602841:102603075:102613294:102613417	2068	136	2509	3	2204	2512
25845	ENSMUSG00000024589	Nedd4l	chr18	+	25845	99,65,57,71,81	1,10,9,2,0	129136154134157	0,0,0,0,0	241	122	3.97778e-09	1.54409e-07	0.98,0.767,0.762,0.947,1.0	1.0,1.0,1.0,1.0,1.0	-0.109	SE	chr18:65172915:65173035:65172274:65172406:65178918:65178996	373	22	710	0	395	710
27347	ENSMUSG00000041491	Cep78	chr19	-	27347	31,16,11,23,25	2,3,0,6,2	9,12,14,16,6	0,0,1,1,0	199	122	7.45222e-06	0.00016894	0.905,0.766,1.0,0.702,0.885	1.0,1.0,0.896,0.907,1.0	-0.109	SE	chr19:15962371:15962449:15955773:15956403:15970532:15970578	106	13	57	2	119	59
42606	ENSMUSG00000053091	Lins1	chr7	+	42606	30,28,14,34,44	3,0,0,14,9	18,25,40,24,43	0,0,0,6,0	226	122	0.00051437	0.0075859	0.844,1.0,1.0,0.567,0.725	1.0,1.0,1.0,0.683,1.0	-0.109	SE	chr7:66708638:66708743:66708039:66708553:66709293:66709435	150	26	150	6	176	156
43423	ENSMUSG00000116953	9030025P20Rik	chr17	+	43423	0,0,0,0,0	8,29,20,13,5	2,26,2,0,0	12,18,20,20,12	244	122	2.73413e-06	6.80479e-05	0.0,0.0,0.0,0.0,0.0	0.077,0.419,0.048,0.0,0.0	-0.109	SE	chr17:14982888:14983034:14982299:14982389:14984817:14984915	0	75	30	82	75	112
46394	ENSMUSG00000036402	Gng12	chr6	+	46394	67,53,74,77,72	62,43,68,56,72	116162212159122	59,72,109,104,89	174	122	0.000399212	0.00604717	0.431,0.464,0.433,0.491,0.412	0.58,0.612,0.577,0.517,0.49	-0.109	SE	chr6:66943824:66943877:66914452:66914510:67015724:67015843	343	301	771	433	644	1204
47459	ENSMUSG00000060470	Adgrg3	chr8	+	47459	638643562658671	473398334460529	417550664636743	195261352260257	243	122	3.84484e-08	1.30705e-06	0.404,0.448,0.458,0.418,0.389	0.518,0.514,0.486,0.551,0.592	-0.109	SE	chr8:95036206:95036328:95035809:95035944:95036440:95036480	3172	2194	3010	1325	5366	4335
1706	ENSMUSG00000030556	Lrrc28	chr7	-	1706	14,24,14,12,13	0,6,0,5,1	25,20,22,16,19	0,0,0,4,0	216	122	0.000260504	0.00539793	1.0,0.693,1.0,0.575,0.88	1.0,1.0,1.0,0.693,1.0	-0.109	A3SS	chr7:67559857:67560064:67559857:67559969:67579689:67579750	77	12	102	4	89	106
3644	ENSMUSG00000033799	Fam208b	chr13	-	3644	2,1,6,2,0	39,17,61,38,22	28,2,9,7,0	30,25,24,19,28	244	122	1.7444e-06	5.34338e-05	0.025,0.029,0.047,0.026,0.0	0.318,0.038,0.158,0.156,0.0	-0.109	RI	chr13:3599938:3600334:3599938:3600062:3600191:3600334	11	177	46	126	188	172
5041	ENSMUSG00000055884	Fancm	chr12	+	5041	56,42,110,78,111	4,3,7,16,11	59,45,50,56,78	0,2,0,4,3	244	122	4.41256e-05	0.000841207	0.875,0.875,0.887,0.709,0.835	1.0,0.918,1.0,0.875,0.929	-0.108	SE	chr12:65097301:65097508:65095720:65095905:65099247:65099452	397	41	288	9	438	297
18271	ENSMUSG00000023066	Rttn	chr18	+	18271	54,28,56,22,36	0,8,0,1,5	78,22,52,25,84	0,0,0,0,3	210	122	6.45038e-05	0.00118198	1.0,0.67,1.0,0.927,0.807	1.0,1.0,1.0,1.0,0.942	-0.108	SE	chr18:89026958:89027047:89021663:89021763:89028891:89029009	196	14	261	3	210	264
42774	ENSMUSG00000002221	Paxip1	chr5	-	42774	120109132129157	28,30,15,31,23	161168139104173	23,3,15,8,22	185	122	7.13986e-05	0.0012939	0.739,0.706,0.853,0.733,0.818	0.822,0.974,0.859,0.896,0.838	-0.108	SE	chr5:27781421:27781485:27775565:27775679:27783680:27783773	647	127	745	71	774	816
1106	ENSMUSG00000005150	Wdr83	chr8	-	1106	34,14,26,40,45	10,2,2,3,4	27,50,36,34,42	2,0,5,0,0	187	122	0.000248627	0.00437952	0.689,0.82,0.895,0.897,0.88	0.898,1.0,0.824,1.0,1.0	-0.108	A5SS	chr8:85080053:85080225:85080119:85080225:85079580:85079707	159	21	189	7	180	196
3314	ENSMUSG00000041459	Tardbp	chr4	-	3314	207108169100124	27,13,18,22,19	101,84,127,79,120	0,9,5,3,0	148	122	2.44806e-10	1.7122e-08	0.863,0.873,0.886,0.789,0.843	1.0,0.885,0.954,0.956,1.0	-0.108	A5SS	chr4:148618646:148618791:148618673:148618791:148617565:148617635	708	99	511	17	807	528
21137	ENSMUSG00000031422	Morf4l2	chrX	-	21137	3.25524e+19	254166223221238	2.04826e+19	28,22,28,20,30	198	122	0	0	0.888,0.901,0.872,0.854,0.865	0.978,0.987,0.984,0.987,0.981	-0.107	SE	chrX:136735545:136735622:136732941:136734501:136739804:136739894	12735	1102	12465	128	13837	12593
47173	ENSMUSG00000030850	Ate1	chr7	-	47173	78,52,70,81,76	113,85,97,82,97	81,69,86,66,78	60,56,79,49,68	244	122	6.73036e-05	0.00122705	0.257,0.234,0.265,0.331,0.281	0.403,0.381,0.352,0.402,0.364	-0.107	SE	chr7:130503721:130503850:130481682:130481715:130504693:130504822	357	474	380	312	831	692
[truncated: 1,043 more rows]

## Sheet: Fig4b P1P2dKO - P1sKO
ID	GeneID	geneSymbol	chr	Strand	ID.1	IJC_SAMPLE_1	SJC_SAMPLE_1	IJC_SAMPLE_2	SJC_SAMPLE_2	IncFormLen	SkipFormLen	PValue	FDR	IncLevel1	IncLevel2	IncLevelDifference	EventType	EventID	sum.IJC_SAMPLE_1	sum.SJC_SAMPLE_1	sum.IJC_SAMPLE_2	sum.SJC_SAMPLE_2	sum.Sample_1	sum.Sample_2
[truncated: 810 more rows]

[truncated: 6 more sheets: P1sKO - Ctrl allresults, P1P2dKO - Ctrl allresults,  P1P2dKO - P1sKO allresults, P1sKO - Ctrl PTBP1 bound, P1P2dKO - Ctrl PTBP1 bound, P1P2dKO - P1sKO PTBP1 bound]
