# Supplementary material for: Polypyrimidine tract-binding proteins are essential for B cell development
Source: eLife. 2020 Feb 21;9:e53557. doi: 10.7554/eLife.53557 (PMC7058386; doi:10.7554/eLife.53557)
Supplement: Figure 5—source data 1. — Results from gene ontology enrichment analysis carried out with the groups of genes identified in Figure 4D and Figure 4E. [file elife-53557-fig5-data1.xls]

## Sheet: Genes.Decr.Ab.P1P2dKOcl_ab
GeneName
Cav2
Itgb2
Rnf17
Dynlt1c
Serpinf1
Pxmp4
Dlg3
Icam2
Cnnm3
Oas1c
Ocrl
Gstt3
Tcirg1
Smo
Trappc6a
Mov10
Borcs8
Dyrk1b
Akap8l
Dennd1c
Lcp2
Hbp1
Cdkn1b
Pld3
Cd79a
Cyp4f18
Klc4
Crot
Nfat5
Ssbp2
Ctse
Stxbp2
Cnn2
Jkamp
Prlr
Pafah1b3
Eps15l1
Crip2
Ptbp1
Saal1
Sertad1
Elk3
Mgst1
Mpo
Rdm1
Pinlyp
Crybg2
Pea15a
Tnfaip8l2
Cluap1
Chfr
Cyp2j9
Gdi1
Ppt2
Anxa9
Camk1g
Hsd11b1
Cr1l
Cd34
Slpi
Acot8
Pipox
Dhx58
Hist1h2bc
Atp6ap1
Ccl9
H13
Rnf145
Rcn3
Rab32
Smpdl3a
Echdc1
Dusp6
Sgk1
Igf1
Elane
Csrp2
Irak3
Zfp354b
Myo19
Atxn7l1
Tspan13
Laptm4a
Rnf135
Fbxl20
Pik3r5
Atp6v1d
Rdh12
Akr1c13
Aldh6a1
Ripk1
Aaed1
Mxd3
Mctp1
Ankra2
Hexb
Txndc16
Rnase6
Sema3g
Slc25a30
Epsti1
Mbnl2
Haus4
4931414P19Rik
Oxr1
Angpt1
Mtbp
Dmc1
Il1rap
Mroh1
Ly6c2
Arc
Dubr
Tnk2
Hcls1
Fmnl3
Calcoco1
Trip6
1700010I14Rik
Mut
Clic5
Cyp39a1
Cyp4f13
Eci1
Dusp1
Plin3
Zeb1
Ms4a6b
Ms4a3
Lipo3
Lipa
Vps51
Il33
Coro1b
Acy3
Aldh3b1
Hps1
Sfxn3
Bbs4
Echs1
Irf7
Sumf2
Arhgef9
Nmb
Tyms
Hk3
Uimc1
Stau2
Eya1
Casp8
Zap70
Plekhb2
Xrcc5
Sp100
Itm2c
Efhd1
Slc35f5
Rgs1
Cdc73
Mr1
Glul
Efcab2
Cfap45
Atp1b1
Sell
Kifap3
Phyh
Optn
Aldh9a1
Nsun6
Dnajc1
Plxdc2
Mindy3
Ssfa2
Slc43a1
Tfpi
Cd82
Slc28a2
Nusap1
Hdc
Ccm2l
Dnmt3b
Fam210b
Zbp1
Lrrcc1
Ect2
Anxa5
Cog6
Serpini1
Tpm3
Trim2
Sh2d2a
Pear1
Acp6
Pias3
Them4
Gem
Cdh17
Gbp2
Invs
Kdm4c
Chmp5
Plin2
Plpp3
Cdkn2c
Osbpl9
Fggy
Kif2c
Ccdc163
Ccdc28b
Inpp5b
Necap2
Mib2
Cd38
Afap1
Khk
Pgm1
Srd5a3
Gbp9
Abcg3
Spp1
Hsd17b11
Gpat3
Ccng2
Acad10
P2rx7
Anxa3
Tmem106b
Tpk1
Pon3
Irf5
Abcg2
Casp2
Rab19
Wbp1
Arhgap25
Hmces
Tuba8
Art4
Klrb1c
Unc45a
Tyrobp
Anapc15
Mylpf
Kif22
Lat
Trim30a
Rexo5
Oat
Slc35a2
Sytl4
Flna
Mpp1
Zcchc18
Ptpn7
Aga
Ap3m2
Wrn
Cenpu
Snx20
Il15
Hp
Cngb1
Mvb12a
Klhl36
Tradd
Maml2
Izumo1r
Tirap
Pou2af1
Ppp2r1b
Robo4
Pde4a
Gclc
Ctsh
Tpm1
Plscr1
Trf
Ip6k2
Fam189b
Malt1
Syde1
Gab3
Lss
3830406C13Rik
Slc35d2
Gm5134
Mcee
Cryzl2
Zdhhc15
Tesk2
Ccdc17
Mks1
Spata6
Pik3ip1
Ttc21b
Hrh2
Dpp4
Zc4h2
Galm
Iqcg
Tmem161b
Gramd1c
Csgalnact1
P2ry13
Gadd45a
Gng12
Wdr44
Mbd5
Stox1
Tmem71
Prf1
Hook3
Ldlrap1
Nudt22
Pafah2
Enpp1
Gch1
Vps13b
Cdkn1c
Armc3
Nmrk1
Ifi206
Aim2
Bank1
Snn
Hpf1
Mturn
Mylip
Primpol
Arl5c
Pcp4l1
Txnip
Egr1
Fcrla
Tm6sf1
Mindy1
Ephx1
Ralgps1
Ppp1r9b
Cpq
Adgrl4
Dap
Tbcd
Lyplal1
Gimap3
Micu3
Zufsp
Fam149b
Usp53
Plekhg5
Ypel5
Galnt12
Gsap
Tax1bp3
Tbc1d10c
Ctsg
Etfrf1
Klhl32
Spns2
Aipl1
Mettl27
Apobec1
Fam208a
Phc1
Rnf167
Cept1
Wdr25
Ripk2
Prkd2
Rbbp8
Tmem29
H2-Ob
Lrrc29
Trem3
Cpsf2
Spidr
Csgalnact2
Wdr11
Abhd14b
Trem1
Pla2g6
Ypel3
Krba1
Nhlrc3
Klhl6
Arl11
Mei4
Filip1l
Hexim2
Usp48
Gjc2
1700048O20Rik
Als2cl
Zrsr1
Dnajc21
Osbpl1a
Tnfaip8l1
Cnrip1
Cenph
Tnfrsf26
Pqlc3
Mms22l
Serpinb9
Rbp1
Tifa
Ticam1
Neurl3
Trpt1
Crry-ps
Cxcr5
Arid4a
Selplg
Tmem81
A630023P12Rik
Pskh1
Cyp4f16
8430408G22Rik
Ccdc125
Gemin4
Arhgap15
Nlrc3
Armcx6
Tcf19
Insl6
Tlr6
Rinl
Lax1
Rgs14
Tmem106c
Dlg2
Isoc2b
Cyp2j6
Pde5a
Pkp3
Mmrn1
Actn4
Foxd2
Tmem191c
Tcf7l1
Ppp4r1l-ps
Trim34a
Pla2g4a
Cep70
BC043934
Ccdc18
Retsat
Hist3h2ba
Trim12c
Colq
Prtn3
Unc13d
Gstm1
Gm8369
Tmod3
Sh2d3c
9630013D21Rik
Zfp945
Slc14a1
Fcgr3
Ccdc28a
Kmt5c
Irak4
Trim5
Fhit
Pla2g16
Blnk
Cd2ap
Patj
Pgghg
Nsl1
Ganc
Stat4
Mthfs
Ifi208
Fxyd6
Zfp810
B3galt4
Tspan6
Hdac8
Zfp467
Il3ra
Selenbp1
Lyz2
Marcks
Fbp1
4930581F22Rik
Fcrl6
Rmdn3
Rbm47
Dtnb
Rnls
Snx29
Apol7e
Smpd5
Spef2
2002-03-01
Gm10517
Lmbrd1
Ccl27a
Ceacam1
Ehd2
Arrdc3
AW112010
Gm13597
Selenom
Smim24
Mrpl48-ps
D130040H23Rik
Ifit1bl1
Gm11110
Mthfsl
Mroh2a
Gm11131
Gm595
Klra1
Gmfg-ps
Gm22107
1810062O18Rik
Gm13842
Gm12305
Hk1os
Gm13919
2610307P16Rik
Plxna4os1
Gm13546
4930481A15Rik
2010001A14Rik
D330023K18Rik
Kantr
Ugt1a7c
Myl6
Gm24407
H1f0
Gm24265
Cdkn2d
Gm16845
1600020E01Rik
Fam120aos
C920009B18Rik
Jpx
Dleu2
1500002F19Rik
Mirt1
4833407H14Rik
Gm28875
4930568A12Rik
1700096K18Rik
Gm37469
Gm38313
Gm30948
Gm37065
Gm42983
5830416I19Rik
Gm19590
Gm44238
Gm34225
Gm47828
Gm32220
Gm35035
Gm34574
5830428M24Rik
Gm48583
Hist1h2bm
AC161376.1
AC150035.3
Klf6
Fer
Arvcf
Tcf7
Vpreb3
Slc7a7
N4bp3
Pcnt
Mxd1
Gramd1a
Tulp3
Jup
Kmt2a
Rpl3l
Stat3
Sgce
Dgkq
Cic
Igf1r
Insr
Spo11
Kmt2b
Ggt5
Arid1a
Hmgcll1
Spib
Carhsp1
Hyal1
Evi5l
Steap4
Clec4f
Eps8
Sertad4
Pls3
Plxdc1
Slc12a7
Eya2
Med13l
Natd1
Grb7
Zfp687
Esr1
Utrn
Crybg1
Tcp11l2
Sgpl1
Vsir
Dock2
Meis1
Adora2a
E2f7
Stk10
Btg2
Tcn2
Myo1g
Smtn
Pik3cg
Tmem132e
Itgb4
Atp2a3
Dvl2
Zfp36l1
Asb2
Otub2
Gpatch2l
Carmil1
Ptch1
Nkd2
Cast
Lpcat1
Serinc5
Zswim8
Spata13
Dpysl2
Sorbs3
Zscan26
Ankrd33b
Rai14
Fzd6
Mtss1
Hdac7
Crebbp
Plec
Nectin3
Zbtb20
Muc13
Pisd-ps2
Tiam2
Abcg1
Nrxn1
Phf1
Anks1
Myo1f
H2-Oa
Tmem2
Ankrd22
Ppp2r5b
Fas
Cabp4
Pitpnm1
Map4k2
Gpam
Tcf7l2
Sorbs1
Dntt
Pik3ap1
Slit1
Gfra1
Maged1
Arhgap19
Maged2
Atp10a
Dgka
R3hdm2
Eps8l2
Rptor
Rassf3
Cplx2
Rdh10
2010300C02Rik
Tmem131
Glb1l
Asb1
Rgs2
Epb41l5
Elk4
Atp2b4
Prkcq
Dab2ip
Ttll11
Notch1
Baz2b
Slc12a6
Cdc25b
Rassf2
Slc52a3
Helz2
Rbl1
Ift80
Npr1
Crtc2
Lef1
Alpk1
Ash1l
Wls
Trp53inp1
Ptgr1
Fam219a
Cd72
Sit1
Pde4b
Nfia
Lrp8
Alpl
Nipal3
Sytl1
Kmt2e
Klf3
Gfi1
Antxr2
Wsb2
Bcl7a
Fam168a
Cit
Oas1b
Slc46a3
Gigyf1
Tfr2
Herc6
Ephb6
Slc37a3
Rab43
Abtb1
Ptms
Plxnd1
Erc1
Itpr2
Cyfip1
Herc2
Iqgap1
Sipa1l3
2200002D01Rik
Dnajb13
Myo7a
Dkk3
Itgam
Chst15
Cask
Gripap1
Wdr13
Tsc22d3
Rasa3
Slc12a3
Adgrg1
Gse1
Mast3
Rab3a
Sesn3
Smarca4
Phip
Tle3
Neil1
Lrrc1
Adamts7
Aph1b
Arpp21
Csrnp1
Nphp3
Uba7
Klhdc8b
Trib3
Snx33
Ccdc88a
Tpcn1
D430042O09Rik
Heyl
Cntrob
Lrig2
Mycbp2
Micall1
Gas7
Gstt2
Dnm2
Crlf2
Arhgef5
Cep350
Foxn3
Atp7a
Dnah8
Fancd2
Tspoap1
Myo15b
Caskin2
Zfp395
Mast4
4930524J08Rik
Tmem98
Tnfsf9
Dok3
Ids
Cerk
Lrrk2
Tmem255a
Ttyh3
Eepd1
Micall2
Arhgap33
BC037034
Apbb1
Mxd4
Depdc5
Arid5a
Plekhg2
BC022687
Spag1
Ppp1r16b
Vopp1
Phf12
Ddx60
Kmt2c
Cntln
Fam198a
Trp53inp2
Cdk19
Parp12
Irs2
Pdk2
F13a1
Runx2
Akna
Ube2h
Cdk5rap2
Nphp4
Capsl
Myl6b
Rere
Trim14
Ptger4
Stat2
Plcb2
Bmf
Ankrd6
Zfp704
Ddx58
Wdr47
Dtx3
Klc3
Rcsd1
Ino80d
Tet2
Pde9a
Chrnb1
Phf8
Ublcp1
Sox15
Mfsd6
Cd1d2
Dlx1
Kdm5b
Sgsm1
Mindy2
Sh2b3
Pbxip1
Rgs8
Shcbp1l
Hectd4
Gng2
Fam129c
Ifi209
Trim56
Cep164
S100a1
Foxo1
Phlpp1
Scml4
H1fx
S1pr1
Gprin3
Smtnl2
Col27a1
Whamm
Scn4b
Tshz1
Tapt1
Spsb4
Khnyn
Taf9b
Ust
Atg16l2
Rell1
Tnrc6b
Entpd1
Crebrf
Nrip1
Ggnbp1
Acap2
Gpr137c
Lig4
Zfp438
Prdm9
Acvr2a
Magi3
D930048N14Rik
Plekhg3
Rnf103
Jun
Senp7
Cbx7
Tcf4
Gm4759
Mettl7a1
Arntl
Zfp78
Pcdh9
Zcchc24
Kbtbd11
Izumo4
Tmem154
Cspp1
Ero1lb
Ebf1
Tmem140
Camk2b
Nfam1
Tpm3-rs7
B3gnt8
Rgs3
Hspa2
Taok2
Kif13b
2610008E11Rik
Cracr2a
Hipk2
Cep128
Tmem91
Rai1
Ifnlr1
Bcl9l
Syne2
Brpf3
Ipcef1
Selenop
Tecpr1
Fbxl12
Myadm
Trp53i11
Capza1
Il18bp
Ifi214
Bicra
Arhgef10
Slfn10-ps
Grcc10
D330041H03Rik
Efcab7
Mob3b
Fam169b
A430078G23Rik
Cass4
Gm14005
Inafm2
Carns1
Ctdsp2
Raet1d
Chd2
Gbp4
Utp14b
H2-T10
Ulbp1
Gm5915
Pisd-ps1
Gm12058
Gm13920
Gm12158
Xist
Gm15409
4930458D05Rik
Tarbp1
Mir99ahg
Neat1
Malat1
9130230N09Rik
Zfp870
1110020A21Rik
Gm10524
Gm17552
Gm26816
Gm26740
Gm26809
Gm27010
Gm4258
5830468F06Rik
Gm12663
Pcdhgb6
Gm32569
Gm37416
Gm10766
Gm37736
Gm42929
Gm43352
Gm43461
Gm31749
Gm44694
Gm45745
Gm45606
Pde2a
Gm45552
AC061963.1
Gm33104
1700027J07Rik
D430020J02Rik
Gm47920
AC113595.1
AC139671.1
AL611986.1

## Sheet: GO_DecreasedAbundance_dKO
GO_PROCESS
GO Term	Description	P-value	FDR q-value	Enrichment	N	B	n	b	Genes
GO:0007165	signal transduction	3.43e-12	4.41e-08	1.53	9811	1586	900	222	[Ptger4 - prostaglandin e receptor 4 (subtype ep4), Fas - fas (tnf receptor superfamily member 6), Tspan13 - tetraspanin 13, Arhgap25 - rho gtpase activating protein 25, Nfat5 - nuclear factor of activated t cells 5, Coro1b - coronin, actin binding protein 1b, Pde5a - phosphodiesterase 5a, cgmp-specific, Nrxn1 - neurexin i, Ptch1 - patched homolog 1, Dgka - diacylglycerol kinase, alpha, Spata13 -…
GO:0002376	immune system process	7.99e-12	5.14e-08	1.81	9811	766	900	127	[Ptger4 - prostaglandin e receptor 4 (subtype ep4), Lig4 - ligase iv, dna, atp-dependent, Fas - fas (tnf receptor superfamily member 6), Spns2 - spinster homolog 2, Mr1 - major histocompatibility complex, class i-related, Rnf135 - ring finger protein 135, Prkd2 - protein kinase d2, Ddx58 - dead (asp-glu-ala-asp) box polypeptide 58, H2-T10 - histocompatibility 2, t region locus 10, Elane - elastas…
GO:0048583	regulation of response to stimulus	2.2e-11	9.44e-08	1.45	9811	1915	900	254	[Ptger4 - prostaglandin e receptor 4 (subtype ep4), Fas - fas (tnf receptor superfamily member 6), Oxr1 - oxidation resistance 1, Rnf135 - ring finger protein 135, Cyp2j6 - cytochrome p450, family 2, subfamily j, polypeptide 6, Arhgap25 - rho gtpase activating protein 25, Nfat5 - nuclear factor of activated t cells 5, H2-T10 - histocompatibility 2, t region locus 10, Camk2b - calcium/calmodulin-d…
GO:0007166	cell surface receptor signaling pathway	6.69e-10	2.15e-06	1.75	9811	716	900	115	[Fas - fas (tnf receptor superfamily member 6), Tspan13 - tetraspanin 13, Prkd2 - protein kinase d2, Tradd - tnfrsf1a-associated via death domain, Plxnd1 - plexin d1, Flna - filamin, alpha, Ptch1 - patched homolog 1, Wls - wntless homolog (drosophila), Cluap1 - clusterin associated protein 1, Ceacam1 - carcinoembryonic antigen-related cell adhesion molecule 1, Hbp1 - high mobility group box trans…
GO:0032501	multicellular organismal process	1.16e-09	2.99e-06	1.51	9811	1320	900	183	[Arc - activity regulated cytoskeletal-associated protein, Aipl1 - aryl hydrocarbon receptor-interacting protein-like 1, Ptger4 - prostaglandin e receptor 4 (subtype ep4), Lig4 - ligase iv, dna, atp-dependent, Oxr1 - oxidation resistance 1, Mr1 - major histocompatibility complex, class i-related, Rbbp8 - retinoblastoma binding protein 8, Abcg1 - atp-binding cassette, sub-family g (white), member …
GO:0051239	regulation of multicellular organismal process	5.3e-09	1.14e-05	1.47	9811	1419	900	191	[Arc - activity regulated cytoskeletal-associated protein, Ptger4 - prostaglandin e receptor 4 (subtype ep4), Lig4 - ligase iv, dna, atp-dependent, Fas - fas (tnf receptor superfamily member 6), Gdi1 - guanosine diphosphate (gdp) dissociation inhibitor 1, Rnf135 - ring finger protein 135, Prkd2 - protein kinase d2, Cyp2j6 - cytochrome p450, family 2, subfamily j, polypeptide 6, Tradd - tnfrsf1a-a…
GO:0006955	immune response	1e-08	1.84e-05	2.02	9811	367	900	68	[Plscr1 - phospholipid scramblase 1, Il15 - interleukin 15, Fas - fas (tnf receptor superfamily member 6), Trim14 - tripartite motif-containing 14, Lax1 - lymphocyte transmembrane adaptor 1, Mr1 - major histocompatibility complex, class i-related, Rnf135 - ring finger protein 135, Prkd2 - protein kinase d2, Crlf2 - cytokine receptor-like factor 2, Ddx58 - dead (asp-glu-ala-asp) box polypeptide 58…
GO:0010646	regulation of cell communication	1.69e-08	2.72e-05	1.42	9811	1590	900	207	[Ptger4 - prostaglandin e receptor 4 (subtype ep4), Fas - fas (tnf receptor superfamily member 6), Cyp2j6 - cytochrome p450, family 2, subfamily j, polypeptide 6, Arhgap25 - rho gtpase activating protein 25, Nfat5 - nuclear factor of activated t cells 5, Camk2b - calcium/calmodulin-dependent protein kinase ii, beta, Lrig2 - leucine-rich repeats and immunoglobulin-like domains 2, Ptbp1 - polypyrim…
GO:0023051	regulation of signaling	2.03e-08	2.91e-05	1.41	9811	1603	900	208	[Ptger4 - prostaglandin e receptor 4 (subtype ep4), Fas - fas (tnf receptor superfamily member 6), Cyp2j6 - cytochrome p450, family 2, subfamily j, polypeptide 6, Arhgap25 - rho gtpase activating protein 25, Nfat5 - nuclear factor of activated t cells 5, Camk2b - calcium/calmodulin-dependent protein kinase ii, beta, Lrig2 - leucine-rich repeats and immunoglobulin-like domains 2, Ptbp1 - polypyrim…
GO:0002682	regulation of immune system process	2.57e-08	3.31e-05	1.67	9811	710	900	109	[Ptger4 - prostaglandin e receptor 4 (subtype ep4), Fas - fas (tnf receptor superfamily member 6), Spns2 - spinster homolog 2, Rnf135 - ring finger protein 135, Prkd2 - protein kinase d2, Ddx58 - dead (asp-glu-ala-asp) box polypeptide 58, H2-T10 - histocompatibility 2, t region locus 10, Elane - elastase, neutrophil expressed, H2-Ob - histocompatibility 2, o region beta locus, H2-Oa - histocompat…
GO:0006952	defense response	3.49e-08	4.08e-05	1.88	9811	441	900	76	[Plscr1 - phospholipid scramblase 1, Gpam - glycerol-3-phosphate acyltransferase, mitochondrial, Ptger4 - prostaglandin e receptor 4 (subtype ep4), Trim14 - tripartite motif-containing 14, Mr1 - major histocompatibility complex, class i-related, Rnf135 - ring finger protein 135, Crlf2 - cytokine receptor-like factor 2, Ddx58 - dead (asp-glu-ala-asp) box polypeptide 58, Elane - elastase, neutrophi…
GO:0043207	response to external biotic stimulus	4.42e-08	4.74e-05	1.93	9811	396	900	70	[Plscr1 - phospholipid scramblase 1, Chmp5 - charged multivesicular body protein 5, Gpam - glycerol-3-phosphate acyltransferase, mitochondrial, Ptger4 - prostaglandin e receptor 4 (subtype ep4), Mr1 - major histocompatibility complex, class i-related, Trf - transferrin, Ddx58 - dead (asp-glu-ala-asp) box polypeptide 58, Rnase6 - ribonuclease, rnase a family, 6, Elane - elastase, neutrophil expres…
GO:0009607	response to biotic stimulus	6.17e-08	6.11e-05	1.89	9811	415	900	72	[Plscr1 - phospholipid scramblase 1, Chmp5 - charged multivesicular body protein 5, Gpam - glycerol-3-phosphate acyltransferase, mitochondrial, Ptger4 - prostaglandin e receptor 4 (subtype ep4), Mr1 - major histocompatibility complex, class i-related, Trf - transferrin, Ddx58 - dead (asp-glu-ala-asp) box polypeptide 58, Rnase6 - ribonuclease, rnase a family, 6, Elane - elastase, neutrophil expres…
GO:0009966	regulation of signal transduction	6.69e-08	6.15e-05	1.43	9811	1437	900	188	[Arc - activity regulated cytoskeletal-associated protein, Aipl1 - aryl hydrocarbon receptor-interacting protein-like 1, Ptger4 - prostaglandin e receptor 4 (subtype ep4), Fas - fas (tnf receptor superfamily member 6), Plekhg2 - pleckstrin homology domain containing, family g (with rhogef domain) member 2, Prkd2 - protein kinase d2, Arhgap25 - rho gtpase activating protein 25, Cyp2j6 - cytochrome…
GO:0009605	response to external stimulus	9.67e-08	8.29e-05	1.68	9811	642	900	99	[Ptger4 - prostaglandin e receptor 4 (subtype ep4), Aipl1 - aryl hydrocarbon receptor-interacting protein-like 1, Fas - fas (tnf receptor superfamily member 6), Mr1 - major histocompatibility complex, class i-related, Ddx58 - dead (asp-glu-ala-asp) box polypeptide 58, Elane - elastase, neutrophil expressed, Prf1 - perforin 1 (pore forming protein), Sesn3 - sestrin 3, Gbp9 - guanylate-binding prot…
GO:0050793	regulation of developmental process	1.51e-07	0.000121	1.45	9811	1256	900	167	[Arc - activity regulated cytoskeletal-associated protein, Lig4 - ligase iv, dna, atp-dependent, Ptger4 - prostaglandin e receptor 4 (subtype ep4), Fas - fas (tnf receptor superfamily member 6), Gdi1 - guanosine diphosphate (gdp) dissociation inhibitor 1, Abcg1 - atp-binding cassette, sub-family g (white), member 1, Prkd2 - protein kinase d2, Tradd - tnfrsf1a-associated via death domain, Camk2b -…
GO:2000026	regulation of multicellular organismal development	2.12e-07	0.00016	1.52	9811	969	900	135	[Arc - activity regulated cytoskeletal-associated protein, Lig4 - ligase iv, dna, atp-dependent, Ptger4 - prostaglandin e receptor 4 (subtype ep4), Fas - fas (tnf receptor superfamily member 6), Gdi1 - guanosine diphosphate (gdp) dissociation inhibitor 1, Prkd2 - protein kinase d2, Tradd - tnfrsf1a-associated via death domain, Camk2b - calcium/calmodulin-dependent protein kinase ii, beta, Lrig2 -…
GO:0002252	immune effector process	2.12e-07	0.000152	2.14	9811	250	900	49	[Plscr1 - phospholipid scramblase 1, Ptger4 - prostaglandin e receptor 4 (subtype ep4), Lig4 - ligase iv, dna, atp-dependent, Gpam - glycerol-3-phosphate acyltransferase, mitochondrial, Fas - fas (tnf receptor superfamily member 6), Crlf2 - cytokine receptor-like factor 2, Ddx58 - dead (asp-glu-ala-asp) box polypeptide 58, Elane - elastase, neutrophil expressed, Prf1 - perforin 1 (pore forming pr…
GO:0050896	response to stimulus	2.19e-07	0.000148	1.29	9811	2387	900	283	[Uba7 - ubiquitin-like modifier activating enzyme 7, Lig4 - ligase iv, dna, atp-dependent, Ptger4 - prostaglandin e receptor 4 (subtype ep4), Fas - fas (tnf receptor superfamily member 6), Oxr1 - oxidation resistance 1, Phf1 - phd finger protein 1, Mr1 - major histocompatibility complex, class i-related, Rnf135 - ring finger protein 135, Abcg1 - atp-binding cassette, sub-family g (white), member …
GO:0051707	response to other organism	2.87e-07	0.000185	2	9811	305	900	56	[Plscr1 - phospholipid scramblase 1, Gpam - glycerol-3-phosphate acyltransferase, mitochondrial, Mr1 - major histocompatibility complex, class i-related, Trf - transferrin, Ddx58 - dead (asp-glu-ala-asp) box polypeptide 58, Elane - elastase, neutrophil expressed, Rnase6 - ribonuclease, rnase a family, 6, Crebbp - creb binding protein, Prf1 - perforin 1 (pore forming protein), Gbp9 - guanylate-bin…
GO:0032879	regulation of localization	2.99e-07	0.000183	1.42	9811	1353	900	176	[Arc - activity regulated cytoskeletal-associated protein, Ptger4 - prostaglandin e receptor 4 (subtype ep4), Fas - fas (tnf receptor superfamily member 6), Gdi1 - guanosine diphosphate (gdp) dissociation inhibitor 1, Tspan13 - tetraspanin 13, Abcg1 - atp-binding cassette, sub-family g (white), member 1, Prkd2 - protein kinase d2, Cyp2j6 - cytochrome p450, family 2, subfamily j, polypeptide 6, Tr…
GO:0048584	positive regulation of response to stimulus	3.75e-07	0.00022	1.49	9811	1033	900	141	[Arc - activity regulated cytoskeletal-associated protein, Ptger4 - prostaglandin e receptor 4 (subtype ep4), Fas - fas (tnf receptor superfamily member 6), Prkd2 - protein kinase d2, Tradd - tnfrsf1a-associated via death domain, Nfat5 - nuclear factor of activated t cells 5, Ddx58 - dead (asp-glu-ala-asp) box polypeptide 58, H2-T10 - histocompatibility 2, t region locus 10, Elane - elastase, neu…
GO:0002443	leukocyte mediated immunity	3.76e-07	0.000211	3.77	9811	52	900	18	[Fas - fas (tnf receptor superfamily member 6), Ephb6 - eph receptor b6, Fcgr3 - fc receptor, igg, low affinity iii, Trem1 - triggering receptor expressed on myeloid cells 1, Crlf2 - cytokine receptor-like factor 2, Myo1g - myosin ig, Myo1f - myosin if, Elane - elastase, neutrophil expressed, Trem3 - triggering receptor expressed on myeloid cells 3, Prf1 - perforin 1 (pore forming protein), Raet1…
GO:0001909	leukocyte mediated cytotoxicity	5.43e-07	0.000291	5.71	9811	21	900	11	[Prf1 - perforin 1 (pore forming protein), Fcgr3 - fc receptor, igg, low affinity iii, Raet1d - retinoic acid early transcript delta, Stxbp2 - syntaxin binding protein 2, Trem1 - triggering receptor expressed on myeloid cells 1, Ulbp1 - ul16 binding protein 1, Ctsh - cathepsin h, Ctsg - cathepsin g, Elane - elastase, neutrophil expressed, Serpinb9 - serine (or cysteine) peptidase inhibitor, clade…
GO:0051704	multi-organism process	6.61e-07	0.00034	1.75	9811	473	900	76	[Plscr1 - phospholipid scramblase 1, Chmp5 - charged multivesicular body protein 5, Gpam - glycerol-3-phosphate acyltransferase, mitochondrial, Mr1 - major histocompatibility complex, class i-related, Trf - transferrin, Ddx58 - dead (asp-glu-ala-asp) box polypeptide 58, Elane - elastase, neutrophil expressed, Rnase6 - ribonuclease, rnase a family, 6, Crebbp - creb binding protein, Ptbp1 - polypyr…
GO:0032101	regulation of response to external stimulus	1.07e-06	0.00053	1.91	9811	325	900	57	[Il15 - interleukin 15, Ptger4 - prostaglandin e receptor 4 (subtype ep4), Aipl1 - aryl hydrocarbon receptor-interacting protein-like 1, Prkd2 - protein kinase d2, Tradd - tnfrsf1a-associated via death domain, Ddx58 - dead (asp-glu-ala-asp) box polypeptide 58, Tlr6 - toll-like receptor 6, Lrig2 - leucine-rich repeats and immunoglobulin-like domains 2, Coro1b - coronin, actin binding protein 1b, P…
GO:0098542	defense response to other organism	1.52e-06	0.000722	2.14	9811	214	900	42	[Plscr1 - phospholipid scramblase 1, Gpam - glycerol-3-phosphate acyltransferase, mitochondrial, Anxa3 - annexin a3, Ifnlr1 - interferon lambda receptor 1, Hist1h2bc - histone cluster 1, h2bc, Trim56 - tripartite motif-containing 56, Mr1 - major histocompatibility complex, class i-related, Ticam1 - toll-like receptor adaptor molecule 1, Trim30a - tripartite motif-containing 30a, Ddx58 - dead (asp…
GO:0002444	myeloid leukocyte mediated immunity	1.72e-06	0.000792	7.27	9811	12	900	8	[Fcgr3 - fc receptor, igg, low affinity iii, Kmt2e - lysine (k)-specific methyltransferase 2e, Trem1 - triggering receptor expressed on myeloid cells 1, Irak4 - interleukin-1 receptor-associated kinase 4, Ctsg - cathepsin g, Myo1f - myosin if, Elane - elastase, neutrophil expressed, Trem3 - triggering receptor expressed on myeloid cells 3]
GO:0001775	cell activation	2.27e-06	0.00101	1.92	9811	301	900	53	[Ptger4 - prostaglandin e receptor 4 (subtype ep4), Lig4 - ligase iv, dna, atp-dependent, Il15 - interleukin 15, Clec4f - c-type lectin domain family 4, member f, Lax1 - lymphocyte transmembrane adaptor 1, Entpd1 - ectonucleoside triphosphate diphosphohydrolase 1, Tlr6 - toll-like receptor 6, Pik3cg - phosphoinositide-3-kinase, catalytic, gamma polypeptide, Dpp4 - dipeptidylpeptidase 4, Jun - jun…
GO:0010033	response to organic substance	3.61e-06	0.00155	1.44	9811	1028	900	136	[Ptger4 - prostaglandin e receptor 4 (subtype ep4), Fas - fas (tnf receptor superfamily member 6), Abcg1 - atp-binding cassette, sub-family g (white), member 1, Prkd2 - protein kinase d2, Tradd - tnfrsf1a-associated via death domain, Nfat5 - nuclear factor of activated t cells 5, Ddx58 - dead (asp-glu-ala-asp) box polypeptide 58, Elane - elastase, neutrophil expressed, Atp2b4 - atpase, ca++ trans…
GO:0051091	positive regulation of DNA-binding transcription factor activity	3.69e-06	0.00153	2.38	9811	142	900	31	[Anxa3 - annexin a3, Trim14 - tripartite motif-containing 14, Ticam1 - toll-like receptor adaptor molecule 1, Hcls1 - hematopoietic cell specific lyn substrate 1, Prkd2 - protein kinase d2, Hipk2 - homeodomain interacting protein kinase 2, Tradd - tnfrsf1a-associated via death domain, Ddx58 - dead (asp-glu-ala-asp) box polypeptide 58, Crtc2 - creb regulated transcription coactivator 2, Crebbp - c…
GO:0006928	movement of cell or subcellular component	3.71e-06	0.00149	1.63	9811	554	900	83	[Arc - activity regulated cytoskeletal-associated protein, Spns2 - spinster homolog 2, Elane - elastase, neutrophil expressed, Atp2b4 - atpase, ca++ transporting, plasma membrane 4, Syne2 - spectrin repeat containing, nuclear envelope 2, Flna - filamin, alpha, Plxnd1 - plexin d1, Jup - junction plakoglobin, Pik3cg - phosphoinositide-3-kinase, catalytic, gamma polypeptide, Coro1b - coronin, actin …
GO:0071310	cellular response to organic substance	4.05e-06	0.00158	1.56	9811	686	900	98	[Ptger4 - prostaglandin e receptor 4 (subtype ep4), Prkd2 - protein kinase d2, Tradd - tnfrsf1a-associated via death domain, Nfat5 - nuclear factor of activated t cells 5, Ddx58 - dead (asp-glu-ala-asp) box polypeptide 58, Atp2b4 - atpase, ca++ transporting, plasma membrane 4, Coro1b - coronin, actin binding protein 1b, Pik3cg - phosphoinositide-3-kinase, catalytic, gamma polypeptide, Sesn3 - ses…
GO:0070887	cellular response to chemical stimulus	5.73e-06	0.00217	1.49	9811	844	900	115	[Ptger4 - prostaglandin e receptor 4 (subtype ep4), Fas - fas (tnf receptor superfamily member 6), Oxr1 - oxidation resistance 1, Prkd2 - protein kinase d2, Tradd - tnfrsf1a-associated via death domain, Ddx58 - dead (asp-glu-ala-asp) box polypeptide 58, Nfat5 - nuclear factor of activated t cells 5, Atp2b4 - atpase, ca++ transporting, plasma membrane 4, Coro1b - coronin, actin binding protein 1b,…
GO:0071495	cellular response to endogenous stimulus	6.16e-06	0.00226	1.86	9811	311	900	53	[Ptger4 - prostaglandin e receptor 4 (subtype ep4), Gpam - glycerol-3-phosphate acyltransferase, mitochondrial, Chmp5 - charged multivesicular body protein 5, Spidr - scaffolding protein involved i dna repair, Atp2b4 - atpase, ca++ transporting, plasma membrane 4, Tlr6 - toll-like receptor 6, Trib3 - tribbles homolog 3 (drosophila), Pik3cg - phosphoinositide-3-kinase, catalytic, gamma polypeptide…
GO:0009617	response to bacterium	6.77e-06	0.00242	2.31	9811	146	900	31	[Anxa3 - annexin a3, Hist1h2bc - histone cluster 1, h2bc, Prlr - prolactin receptor, Mr1 - major histocompatibility complex, class i-related, Alpk1 - alpha-kinase 1, Trf - transferrin, Trim30a - tripartite motif-containing 30a, Myo1f - myosin if, Elane - elastase, neutrophil expressed, Rnase6 - ribonuclease, rnase a family, 6, Gbp9 - guanylate-binding protein 9, Bank1 - b cell scaffold protein wi…
GO:0031349	positive regulation of defense response	9.07e-06	0.00315	2.28	9811	148	900	31	[Plscr1 - phospholipid scramblase 1, Pik3ap1 - phosphoinositide-3-kinase adaptor protein 1, Ptger4 - prostaglandin e receptor 4 (subtype ep4), Klrb1c - killer cell lectin-like receptor subfamily b member 1c, Alpk1 - alpha-kinase 1, Ticam1 - toll-like receptor adaptor molecule 1, Tradd - tnfrsf1a-associated via death domain, Ddx58 - dead (asp-glu-ala-asp) box polypeptide 58, Tlr6 - toll-like recep…
GO:1902531	regulation of intracellular signal transduction	9.19e-06	0.00311	1.46	9811	889	900	119	[Ptger4 - prostaglandin e receptor 4 (subtype ep4), Fas - fas (tnf receptor superfamily member 6), Plekhg2 - pleckstrin homology domain containing, family g (with rhogef domain) member 2, Prkd2 - protein kinase d2, Arhgap25 - rho gtpase activating protein 25, Tradd - tnfrsf1a-associated via death domain, Nfat5 - nuclear factor of activated t cells 5, Atp2b4 - atpase, ca++ transporting, plasma mem…
GO:0034330	cell junction organization	1.09e-05	0.00359	2.87	9811	76	900	20	[Arvcf - armadillo repeat gene deleted in velo-cardio-facial syndrome, Mtss1 - metastasis suppressor 1, Itgb4 - integrin beta 4, Taok2 - tao kinase 2, Cdh17 - cadherin 17, Plec - plectin, Actn4 - actinin alpha 4, Tbcd - tubulin-specific chaperone d, Tesk2 - testis-specific kinase 2, Hdac7 - histone deacetylase 7, Flna - filamin, alpha, Capza1 - capping protein (actin filament) muscle z-line, alph…
GO:0031347	regulation of defense response	1.2e-05	0.00385	1.84	9811	302	900	51	[Plscr1 - phospholipid scramblase 1, Ptger4 - prostaglandin e receptor 4 (subtype ep4), Il15 - interleukin 15, Rnf135 - ring finger protein 135, Tradd - tnfrsf1a-associated via death domain, Ddx58 - dead (asp-glu-ala-asp) box polypeptide 58, Tlr6 - toll-like receptor 6, Pik3cg - phosphoinositide-3-kinase, catalytic, gamma polypeptide, Pde5a - phosphodiesterase 5a, cgmp-specific, Raet1d - retinoic…
GO:0001906	cell killing	1.2e-05	0.00376	4.44	9811	27	900	11	[Prf1 - perforin 1 (pore forming protein), Fcgr3 - fc receptor, igg, low affinity iii, Raet1d - retinoic acid early transcript delta, Stxbp2 - syntaxin binding protein 2, Trem1 - triggering receptor expressed on myeloid cells 1, Ulbp1 - ul16 binding protein 1, Ctsh - cathepsin h, Ctsg - cathepsin g, Elane - elastase, neutrophil expressed, Trem3 - triggering receptor expressed on myeloid cells 3, …
GO:0051240	positive regulation of multicellular organismal process	1.25e-05	0.00382	1.46	9811	858	900	115	[Lig4 - ligase iv, dna, atp-dependent, Ptger4 - prostaglandin e receptor 4 (subtype ep4), Gdi1 - guanosine diphosphate (gdp) dissociation inhibitor 1, Rnf135 - ring finger protein 135, Prkd2 - protein kinase d2, Cyp2j6 - cytochrome p450, family 2, subfamily j, polypeptide 6, Tradd - tnfrsf1a-associated via death domain, Ddx58 - dead (asp-glu-ala-asp) box polypeptide 58, Elane - elastase, neutroph…
GO:0002446	neutrophil mediated immunity	1.27e-05	0.00379	6.94	9811	11	900	7	[Kmt2e - lysine (k)-specific methyltransferase 2e, Trem1 - triggering receptor expressed on myeloid cells 1, Irak4 - interleukin-1 receptor-associated kinase 4, Ctsg - cathepsin g, Myo1f - myosin if, Elane - elastase, neutrophil expressed, Trem3 - triggering receptor expressed on myeloid cells 3]
GO:1903532	positive regulation of secretion by cell	1.41e-05	0.00413	2.07	9811	195	900	37	[Ptger4 - prostaglandin e receptor 4 (subtype ep4), Atp6ap1 - atpase, h+ transporting, lysosomal accessory protein 1, Glul - glutamate-ammonia ligase (glutamine synthetase), Tcf7l2 - transcription factor 7 like 2, t cell specific, hmg box, Cyp2j6 - cytochrome p450, family 2, subfamily j, polypeptide 6, Crlf2 - cytokine receptor-like factor 2, Ddx58 - dead (asp-glu-ala-asp) box polypeptide 58, Cd3…
GO:0051960	regulation of nervous system development	1.45e-05	0.00414	1.65	9811	470	900	71	[Arc - activity regulated cytoskeletal-associated protein, Lig4 - ligase iv, dna, atp-dependent, Fas - fas (tnf receptor superfamily member 6), Gdi1 - guanosine diphosphate (gdp) dissociation inhibitor 1, Trf - transferrin, Cd38 - cd38 antigen, Camk2b - calcium/calmodulin-dependent protein kinase ii, beta, Lrig2 - leucine-rich repeats and immunoglobulin-like domains 2, Flna - filamin, alpha, Plxn…
GO:0032502	developmental process	1.45e-05	0.00407	1.25	9811	2217	900	255	[Ptger4 - prostaglandin e receptor 4 (subtype ep4), Lig4 - ligase iv, dna, atp-dependent, Fas - fas (tnf receptor superfamily member 6), Camk2b - calcium/calmodulin-dependent protein kinase ii, beta, Nrxn1 - neurexin i, Ptch1 - patched homolog 1, Wls - wntless homolog (drosophila), Arl11 - adp-ribosylation factor-like 11, Chrnb1 - cholinergic receptor, nicotinic, beta polypeptide 1 (muscle), Kmt2…
GO:0002684	positive regulation of immune system process	1.56e-05	0.00428	1.66	9811	454	900	69	[Plscr1 - phospholipid scramblase 1, Gpam - glycerol-3-phosphate acyltransferase, mitochondrial, Ptger4 - prostaglandin e receptor 4 (subtype ep4), Il15 - interleukin 15, Atp6ap1 - atpase, h+ transporting, lysosomal accessory protein 1, Lax1 - lymphocyte transmembrane adaptor 1, Prkd2 - protein kinase d2, Crlf2 - cytokine receptor-like factor 2, Ddx58 - dead (asp-glu-ala-asp) box polypeptide 58, …
GO:0048870	cell motility	2.15e-05	0.00577	1.72	9811	374	900	59	[Arc - activity regulated cytoskeletal-associated protein, Spns2 - spinster homolog 2, Elane - elastase, neutrophil expressed, Atp2b4 - atpase, ca++ transporting, plasma membrane 4, Syne2 - spectrin repeat containing, nuclear envelope 2, Plxnd1 - plexin d1, Flna - filamin, alpha, Coro1b - coronin, actin binding protein 1b, Pik3cg - phosphoinositide-3-kinase, catalytic, gamma polypeptide, Jup - ju…
GO:0009719	response to endogenous stimulus	2.17e-05	0.0057	1.68	9811	416	900	64	[Chmp5 - charged multivesicular body protein 5, Gpam - glycerol-3-phosphate acyltransferase, mitochondrial, Ptger4 - prostaglandin e receptor 4 (subtype ep4), Fas - fas (tnf receptor superfamily member 6), Spidr - scaffolding protein involved i dna repair, Cd38 - cd38 antigen, Atp2b4 - atpase, ca++ transporting, plasma membrane 4, Trib3 - tribbles homolog 3 (drosophila), Tlr6 - toll-like receptor…
GO:0051049	regulation of transport	2.31e-05	0.00593	1.44	9811	888	900	117	[Arc - activity regulated cytoskeletal-associated protein, Ptger4 - prostaglandin e receptor 4 (subtype ep4), Gdi1 - guanosine diphosphate (gdp) dissociation inhibitor 1, Tspan13 - tetraspanin 13, Abcg1 - atp-binding cassette, sub-family g (white), member 1, Cyp2j6 - cytochrome p450, family 2, subfamily j, polypeptide 6, Ddx58 - dead (asp-glu-ala-asp) box polypeptide 58, Atp2b4 - atpase, ca++ tra…
GO:0050663	cytokine secretion	2.38e-05	0.00601	4.54	9811	24	900	10	[Gpam - glycerol-3-phosphate acyltransferase, mitochondrial, Il1rap - interleukin 1 receptor accessory protein, Ephb6 - eph receptor b6, Optn - optineurin, Trem1 - triggering receptor expressed on myeloid cells 1, Notch1 - notch 1, Lcp2 - lymphocyte cytosolic protein 2, Aim2 - absent in melanoma 2, Trem3 - triggering receptor expressed on myeloid cells 3, Tlr6 - toll-like receptor 6]
GO:0030154	cell differentiation	2.6e-05	0.00644	1.42	9811	946	900	123	[Lig4 - ligase iv, dna, atp-dependent, Ptger4 - prostaglandin e receptor 4 (subtype ep4), Camk2b - calcium/calmodulin-dependent protein kinase ii, beta, Flna - filamin, alpha, Nrxn1 - neurexin i, Ptch1 - patched homolog 1, E2f7 - e2f transcription factor 7, Hspa2 - heat shock protein 2, Cit - citron, Arl11 - adp-ribosylation factor-like 11, Rmdn3 - regulator of microtubule dynamics 3, Kmt2b - lys…
GO:0051047	positive regulation of secretion	2.65e-05	0.00643	1.99	9811	208	900	38	[Cyp4f18 - cytochrome p450, family 4, subfamily f, polypeptide 18, Ptger4 - prostaglandin e receptor 4 (subtype ep4), Atp6ap1 - atpase, h+ transporting, lysosomal accessory protein 1, Glul - glutamate-ammonia ligase (glutamine synthetase), Tcf7l2 - transcription factor 7 like 2, t cell specific, hmg box, Cyp2j6 - cytochrome p450, family 2, subfamily j, polypeptide 6, Crlf2 - cytokine receptor-lik…
GO:0050678	regulation of epithelial cell proliferation	2.82e-05	0.00672	2.19	9811	149	900	30	[Ift80 - intraflagellar transport 80, Mtss1 - metastasis suppressor 1, Zfp36l1 - zinc finger protein 36, c3h type-like 1, Tcf7l2 - transcription factor 7 like 2, t cell specific, hmg box, Glul - glutamate-ammonia ligase (glutamine synthetase), Prkd2 - protein kinase d2, Notch1 - notch 1, Nlrc3 - nlr family, card domain containing 3, Wdr13 - wd repeat domain 13, Hyal1 - hyaluronoglucosaminidase 1,…
GO:0051090	regulation of DNA-binding transcription factor activity	2.97e-05	0.00694	1.91	9811	240	900	42	[Anxa3 - annexin a3, Trim14 - tripartite motif-containing 14, Tcf7l2 - transcription factor 7 like 2, t cell specific, hmg box, Ticam1 - toll-like receptor adaptor molecule 1, Hcls1 - hematopoietic cell specific lyn substrate 1, Prkd2 - protein kinase d2, Hipk2 - homeodomain interacting protein kinase 2, Dap - death-associated protein, Tradd - tnfrsf1a-associated via death domain, Crtc2 - creb re…
GO:1901700	response to oxygen-containing compound	2.97e-05	0.00682	1.55	9811	576	900	82	[Plscr1 - phospholipid scramblase 1, Chmp5 - charged multivesicular body protein 5, Gpam - glycerol-3-phosphate acyltransferase, mitochondrial, Ptger4 - prostaglandin e receptor 4 (subtype ep4), Oxr1 - oxidation resistance 1, Spidr - scaffolding protein involved i dna repair, Elane - elastase, neutrophil expressed, Atp2b4 - atpase, ca++ transporting, plasma membrane 4, Cd38 - cd38 antigen, Trib3 …
GO:0040011	locomotion	3.15e-05	0.00712	1.67	9811	404	900	62	[Arc - activity regulated cytoskeletal-associated protein, Spns2 - spinster homolog 2, Elane - elastase, neutrophil expressed, Atp2b4 - atpase, ca++ transporting, plasma membrane 4, Syne2 - spectrin repeat containing, nuclear envelope 2, Plxnd1 - plexin d1, Flna - filamin, alpha, Jup - junction plakoglobin, Pik3cg - phosphoinositide-3-kinase, catalytic, gamma polypeptide, Coro1b - coronin, actin …
GO:0010817	regulation of hormone levels	3.18e-05	0.00706	2	9811	202	900	37	[Ptger4 - prostaglandin e receptor 4 (subtype ep4), Anxa5 - annexin a5, Glul - glutamate-ammonia ligase (glutamine synthetase), Tcf7l2 - transcription factor 7 like 2, t cell specific, hmg box, Dgkq - diacylglycerol kinase, theta, Cd38 - cd38 antigen, Hsd11b1 - hydroxysteroid 11-beta dehydrogenase 1, Nmb - neuromedin b, Rdh12 - retinol dehydrogenase 12, Ptbp1 - polypyrimidine tract binding protei…
GO:0003008	system process	3.26e-05	0.00711	1.68	9811	396	900	61	[Arc - activity regulated cytoskeletal-associated protein, Ptger4 - prostaglandin e receptor 4 (subtype ep4), Aipl1 - aryl hydrocarbon receptor-interacting protein-like 1, Grcc10 - gene rich cluster, c10 gene, Camk2b - calcium/calmodulin-dependent protein kinase ii, beta, Cd38 - cd38 antigen, Lrig2 - leucine-rich repeats and immunoglobulin-like domains 2, Rdh12 - retinol dehydrogenase 12, Jun - j…
GO:0042221	response to chemical	3.27e-05	0.00701	1.35	9811	1263	900	156	[Ptger4 - prostaglandin e receptor 4 (subtype ep4), Fas - fas (tnf receptor superfamily member 6), Gdi1 - guanosine diphosphate (gdp) dissociation inhibitor 1, Oxr1 - oxidation resistance 1, Abcg1 - atp-binding cassette, sub-family g (white), member 1, Prkd2 - protein kinase d2, Tradd - tnfrsf1a-associated via death domain, Nfat5 - nuclear factor of activated t cells 5, Ddx58 - dead (asp-glu-ala-…
GO:0009653	anatomical structure morphogenesis	3.5e-05	0.00738	1.52	9811	623	900	87	[Ptger4 - prostaglandin e receptor 4 (subtype ep4), Tshz1 - teashirt zinc finger family member 1, Grcc10 - gene rich cluster, c10 gene, Hipk2 - homeodomain interacting protein kinase 2, Ccm2l - cerebral cavernous malformation 2-like, Camk2b - calcium/calmodulin-dependent protein kinase ii, beta, Lipa - lysosomal acid lipase a, Flna - filamin, alpha, Plxnd1 - plexin d1, Jun - jun oncogene, Smo - s…
GO:0050900	leukocyte migration	3.65e-05	0.00757	2.66	9811	82	900	20	[Pde4b - phosphodiesterase 4b, camp specific, Itgam - integrin alpha m, Fcgr3 - fc receptor, igg, low affinity iii, Spns2 - spinster homolog 2, Trem1 - triggering receptor expressed on myeloid cells 1, Myo1g - myosin ig, Elane - elastase, neutrophil expressed, Trem3 - triggering receptor expressed on myeloid cells 3, Eps8 - epidermal growth factor receptor pathway substrate 8, Itgb2 - integrin be…
GO:1901701	cellular response to oxygen-containing compound	4.06e-05	0.00829	1.68	9811	382	900	59	[Plscr1 - phospholipid scramblase 1, Ptger4 - prostaglandin e receptor 4 (subtype ep4), Gpam - glycerol-3-phosphate acyltransferase, mitochondrial, Chmp5 - charged multivesicular body protein 5, Oxr1 - oxidation resistance 1, Spidr - scaffolding protein involved i dna repair, Atp2b4 - atpase, ca++ transporting, plasma membrane 4, Tlr6 - toll-like receptor 6, Trib3 - tribbles homolog 3 (drosophila…
GO:0010647	positive regulation of cell communication	4.32e-05	0.00869	1.44	9811	808	900	107	[Arc - activity regulated cytoskeletal-associated protein, Ptger4 - prostaglandin e receptor 4 (subtype ep4), Fas - fas (tnf receptor superfamily member 6), Prkd2 - protein kinase d2, Tradd - tnfrsf1a-associated via death domain, Nfat5 - nuclear factor of activated t cells 5, Camk2b - calcium/calmodulin-dependent protein kinase ii, beta, Flna - filamin, alpha, Pik3cg - phosphoinositide-3-kinase, …
GO:0034329	cell junction assembly	4.37e-05	0.00866	3.01	9811	58	900	16	[Arvcf - armadillo repeat gene deleted in velo-cardio-facial syndrome, Itgb4 - integrin beta 4, Taok2 - tao kinase 2, Cdh17 - cadherin 17, Plec - plectin, Actn4 - actinin alpha 4, Tbcd - tubulin-specific chaperone d, Tesk2 - testis-specific kinase 2, Hdac7 - histone deacetylase 7, Capza1 - capping protein (actin filament) muscle z-line, alpha 1, Jup - junction plakoglobin, Pkp3 - plakophilin 3, E…
GO:0065007	biological regulation	4.41e-05	0.00861	1.11	9811	5507	900	561	[Ptger4 - prostaglandin e receptor 4 (subtype ep4), Akna - at-hook transcription factor, Rnf135 - ring finger protein 135, Abcg1 - atp-binding cassette, sub-family g (white), member 1, Cyp2j6 - cytochrome p450, family 2, subfamily j, polypeptide 6, H2-T10 - histocompatibility 2, t region locus 10, Lrig2 - leucine-rich repeats and immunoglobulin-like domains 2, H2-Ob - histocompatibility 2, o regi…
GO:0040012	regulation of locomotion	4.79e-05	0.0092	1.59	9811	487	900	71	[Ptger4 - prostaglandin e receptor 4 (subtype ep4), Grb7 - growth factor receptor bound protein 7, Fas - fas (tnf receptor superfamily member 6), Trf - transferrin, Prkd2 - protein kinase d2, Tradd - tnfrsf1a-associated via death domain, Trip6 - thyroid hormone receptor interactor 6, Ddx58 - dead (asp-glu-ala-asp) box polypeptide 58, Elane - elastase, neutrophil expressed, Camk2b - calcium/calmod…
GO:0045595	regulation of cell differentiation	5.05e-05	0.00955	1.42	9811	885	900	115	[Arc - activity regulated cytoskeletal-associated protein, Lig4 - ligase iv, dna, atp-dependent, Ptger4 - prostaglandin e receptor 4 (subtype ep4), Fas - fas (tnf receptor superfamily member 6), Gdi1 - guanosine diphosphate (gdp) dissociation inhibitor 1, Abcg1 - atp-binding cassette, sub-family g (white), member 1, Camk2b - calcium/calmodulin-dependent protein kinase ii, beta, Lrig2 - leucine-ri…
GO:0002526	acute inflammatory response	5.57e-05	0.0104	5.13	9811	17	900	8	[Plscr1 - phospholipid scramblase 1, Hp - haptoglobin, Ephb6 - eph receptor b6, Fcgr3 - fc receptor, igg, low affinity iii, Trem1 - triggering receptor expressed on myeloid cells 1, Stat3 - signal transducer and activator of transcription 3, Elane - elastase, neutrophil expressed, Serpinb9 - serine (or cysteine) peptidase inhibitor, clade b, member 9]
GO:0048856	anatomical structure development	5.62e-05	0.0103	1.31	9811	1470	900	176	[Arc - activity regulated cytoskeletal-associated protein, Lig4 - ligase iv, dna, atp-dependent, Ptger4 - prostaglandin e receptor 4 (subtype ep4), Fas - fas (tnf receptor superfamily member 6), Spns2 - spinster homolog 2, Camk2b - calcium/calmodulin-dependent protein kinase ii, beta, Hsd11b1 - hydroxysteroid 11-beta dehydrogenase 1, Plxnd1 - plexin d1, Flna - filamin, alpha, Ptch1 - patched homo…
GO:0043410	positive regulation of MAPK cascade	5.75e-05	0.0104	1.91	9811	223	900	39	[Atp6ap1 - atpase, h+ transporting, lysosomal accessory protein 1, Trf - transferrin, Prkd2 - protein kinase d2, Hipk2 - homeodomain interacting protein kinase 2, Notch1 - notch 1, Tlr6 - toll-like receptor 6, Pik3cg - phosphoinositide-3-kinase, catalytic, gamma polypeptide, Ccl9 - chemokine (c-c motif) ligand 9, Jun - jun oncogene, Pde5a - phosphodiesterase 5a, cgmp-specific, Nrxn1 - neurexin i,…
GO:0045088	regulation of innate immune response	5.84e-05	0.0104	2.09	9811	162	900	31	[Plscr1 - phospholipid scramblase 1, Pik3ap1 - phosphoinositide-3-kinase adaptor protein 1, Klrb1c - killer cell lectin-like receptor subfamily b member 1c, Alpk1 - alpha-kinase 1, Ticam1 - toll-like receptor adaptor molecule 1, Rnf135 - ring finger protein 135, Trim30a - tripartite motif-containing 30a, Ddx58 - dead (asp-glu-ala-asp) box polypeptide 58, Myo1f - myosin if, Nlrc3 - nlr family, car…
GO:0023056	positive regulation of signaling	6.2e-05	0.0109	1.43	9811	815	900	107	[Arc - activity regulated cytoskeletal-associated protein, Ptger4 - prostaglandin e receptor 4 (subtype ep4), Fas - fas (tnf receptor superfamily member 6), Prkd2 - protein kinase d2, Tradd - tnfrsf1a-associated via death domain, Nfat5 - nuclear factor of activated t cells 5, Camk2b - calcium/calmodulin-dependent protein kinase ii, beta, Flna - filamin, alpha, Pik3cg - phosphoinositide-3-kinase, …
GO:0050767	regulation of neurogenesis	6.72e-05	0.0117	1.61	9811	440	900	65	[Arc - activity regulated cytoskeletal-associated protein, Lig4 - ligase iv, dna, atp-dependent, Fas - fas (tnf receptor superfamily member 6), Gdi1 - guanosine diphosphate (gdp) dissociation inhibitor 1, Trf - transferrin, Camk2b - calcium/calmodulin-dependent protein kinase ii, beta, Cd38 - cd38 antigen, Lrig2 - leucine-rich repeats and immunoglobulin-like domains 2, Flna - filamin, alpha, Plxn…
GO:0048869	cellular developmental process	6.73e-05	0.0115	1.32	9811	1319	900	160	[Lig4 - ligase iv, dna, atp-dependent, Ptger4 - prostaglandin e receptor 4 (subtype ep4), Camk2b - calcium/calmodulin-dependent protein kinase ii, beta, Flna - filamin, alpha, Nrxn1 - neurexin i, Ptch1 - patched homolog 1, E2f7 - e2f transcription factor 7, Hspa2 - heat shock protein 2, Cit - citron, Arl11 - adp-ribosylation factor-like 11, Rmdn3 - regulator of microtubule dynamics 3, Chrnb1 - ch…
GO:0043405	regulation of MAP kinase activity	6.95e-05	0.0118	2.1	9811	156	900	30	[Lax1 - lymphocyte transmembrane adaptor 1, Trf - transferrin, Trib3 - tribbles homolog 3 (drosophila), Tlr6 - toll-like receptor 6, Pik3cg - phosphoinositide-3-kinase, catalytic, gamma polypeptide, Pde5a - phosphodiesterase 5a, cgmp-specific, Irak3 - interleukin-1 receptor-associated kinase 3, Ceacam1 - carcinoembryonic antigen-related cell adhesion molecule 1, Rgs2 - regulator of g-protein sign…
GO:0046068	cGMP metabolic process	7.04e-05	0.0118	10.9	9811	4	900	4	[Pde2a - phosphodiesterase 2a, cgmp-stimulated, Npr1 - natriuretic peptide receptor 1, Pde5a - phosphodiesterase 5a, cgmp-specific, Pde9a - phosphodiesterase 9a]
GO:0050714	positive regulation of protein secretion	7.08e-05	0.0117	2.23	9811	127	900	26	[Ptger4 - prostaglandin e receptor 4 (subtype ep4), Tcf7l2 - transcription factor 7 like 2, t cell specific, hmg box, Glul - glutamate-ammonia ligase (glutamine synthetase), Cyp2j6 - cytochrome p450, family 2, subfamily j, polypeptide 6, Crlf2 - cytokine receptor-like factor 2, Ddx58 - dead (asp-glu-ala-asp) box polypeptide 58, Cd38 - cd38 antigen, Ptbp1 - polypyrimidine tract binding protein 1, …
GO:0045321	leukocyte activation	7.08e-05	0.0115	1.8	9811	273	900	45	[Il15 - interleukin 15, Ptger4 - prostaglandin e receptor 4 (subtype ep4), Lig4 - ligase iv, dna, atp-dependent, Anxa3 - annexin a3, Klrb1c - killer cell lectin-like receptor subfamily b member 1c, Lat - linker for activation of t cells, Zfp36l1 - zinc finger protein 36, c3h type-like 1, Clec4f - c-type lectin domain family 4, member f, Blnk - b cell linker, Lax1 - lymphocyte transmembrane adapto…
GO:0051270	regulation of cellular component movement	7.35e-05	0.0118	1.58	9811	476	900	69	[Ptger4 - prostaglandin e receptor 4 (subtype ep4), Grb7 - growth factor receptor bound protein 7, Fas - fas (tnf receptor superfamily member 6), Trf - transferrin, Prkd2 - protein kinase d2, Tradd - tnfrsf1a-associated via death domain, Trip6 - thyroid hormone receptor interactor 6, Ddx58 - dead (asp-glu-ala-asp) box polypeptide 58, Elane - elastase, neutrophil expressed, Camk2b - calcium/calmod…
GO:0009967	positive regulation of signal transduction	7.53e-05	0.012	1.45	9811	736	900	98	[Arc - activity regulated cytoskeletal-associated protein, Ptger4 - prostaglandin e receptor 4 (subtype ep4), Fas - fas (tnf receptor superfamily member 6), Prkd2 - protein kinase d2, Tradd - tnfrsf1a-associated via death domain, Nfat5 - nuclear factor of activated t cells 5, Camk2b - calcium/calmodulin-dependent protein kinase ii, beta, Flna - filamin, alpha, Pik3cg - phosphoinositide-3-kinase, …
GO:0060284	regulation of cell development	7.72e-05	0.0121	1.56	9811	503	900	72	[Arc - activity regulated cytoskeletal-associated protein, Lig4 - ligase iv, dna, atp-dependent, Fas - fas (tnf receptor superfamily member 6), Gdi1 - guanosine diphosphate (gdp) dissociation inhibitor 1, Atp6ap1 - atpase, h+ transporting, lysosomal accessory protein 1, Trf - transferrin, Cd38 - cd38 antigen, Camk2b - calcium/calmodulin-dependent protein kinase ii, beta, Lrig2 - leucine-rich repe…
GO:0016477	cell migration	7.78e-05	0.0121	1.7	9811	340	900	53	[Arc - activity regulated cytoskeletal-associated protein, Spns2 - spinster homolog 2, Elane - elastase, neutrophil expressed, Syne2 - spectrin repeat containing, nuclear envelope 2, Flna - filamin, alpha, Plxnd1 - plexin d1, Coro1b - coronin, actin binding protein 1b, Pik3cg - phosphoinositide-3-kinase, catalytic, gamma polypeptide, Jup - junction plakoglobin, Dpp4 - dipeptidylpeptidase 4, Smo -…
GO:0045860	positive regulation of protein kinase activity	7.88e-05	0.0121	1.85	9811	242	900	41	[Lat - linker for activation of t cells, Prlr - prolactin receptor, Trf - transferrin, Atp2b4 - atpase, ca++ transporting, plasma membrane 4, Tlr6 - toll-like receptor 6, Pik3cg - phosphoinositide-3-kinase, catalytic, gamma polypeptide, Nrxn1 - neurexin i, Pde5a - phosphodiesterase 5a, cgmp-specific, Ect2 - ect2 oncogene, Cass4 - cas scaffolding protein family member 4, Stox1 - storkhead box 1, C…
GO:0002460	adaptive immune response based on somatic recombination of immune receptors built from immunoglobulin superfamily domains	8.57e-05	0.013	3.11	9811	49	900	14	[Fas - fas (tnf receptor superfamily member 6), Ephb6 - eph receptor b6, Klhl6 - kelch-like 6, Fcgr3 - fc receptor, igg, low affinity iii, Il18bp - interleukin 18 binding protein, Crlf2 - cytokine receptor-like factor 2, Myo1g - myosin ig, Unc13d - unc-13 homolog d (c. elegans), Prf1 - perforin 1 (pore forming protein), Raet1d - retinoic acid early transcript delta, Ulbp1 - ul16 binding protein 1…
GO:0002793	positive regulation of peptide secretion	9.01e-05	0.0135	2.16	9811	136	900	27	[Ptger4 - prostaglandin e receptor 4 (subtype ep4), Tcf7l2 - transcription factor 7 like 2, t cell specific, hmg box, Glul - glutamate-ammonia ligase (glutamine synthetase), Cyp2j6 - cytochrome p450, family 2, subfamily j, polypeptide 6, Crlf2 - cytokine receptor-like factor 2, Ddx58 - dead (asp-glu-ala-asp) box polypeptide 58, Cd38 - cd38 antigen, Ptbp1 - polypyrimidine tract binding protein 1, …
GO:0002456	T cell mediated immunity	9.22e-05	0.0136	4.84	9811	18	900	8	[Prf1 - perforin 1 (pore forming protein), Ephb6 - eph receptor b6, Raet1d - retinoic acid early transcript delta, Ulbp1 - ul16 binding protein 1, Crlf2 - cytokine receptor-like factor 2, Ctsh - cathepsin h, Myo1g - myosin ig, Serpinb9 - serine (or cysteine) peptidase inhibitor, clade b, member 9]
GO:0050877	nervous system process	9.44e-05	0.0138	1.8	9811	260	900	43	[Eps8l2 - eps8-like 2, Arc - activity regulated cytoskeletal-associated protein, Aipl1 - aryl hydrocarbon receptor-interacting protein-like 1, Cabp4 - calcium binding protein 4, Grcc10 - gene rich cluster, c10 gene, Myo7a - myosin viia, Cyfip1 - cytoplasmic fmr1 interacting protein 1, Dlg2 - discs, large homolog 2 (drosophila), Camk2b - calcium/calmodulin-dependent protein kinase ii, beta, Lrig2 …
GO:0048518	positive regulation of biological process	0.000104	0.0151	1.18	9811	3134	900	338	[Lig4 - ligase iv, dna, atp-dependent, Ptger4 - prostaglandin e receptor 4 (subtype ep4), Fas - fas (tnf receptor superfamily member 6), Akna - at-hook transcription factor, Phf1 - phd finger protein 1, Rnf135 - ring finger protein 135, Abcg1 - atp-binding cassette, sub-family g (white), member 1, Cyp2j6 - cytochrome p450, family 2, subfamily j, polypeptide 6, Nfat5 - nuclear factor of activated …
GO:0050776	regulation of immune response	0.000113	0.0162	1.61	9811	413	900	61	[Plscr1 - phospholipid scramblase 1, Il15 - interleukin 15, Lax1 - lymphocyte transmembrane adaptor 1, Spns2 - spinster homolog 2, Rnf135 - ring finger protein 135, Prkd2 - protein kinase d2, Ddx58 - dead (asp-glu-ala-asp) box polypeptide 58, H2-T10 - histocompatibility 2, t region locus 10, Elane - elastase, neutrophil expressed, Cd38 - cd38 antigen, Tlr6 - toll-like receptor 6, Dpp4 - dipeptidy…
GO:1903530	regulation of secretion by cell	0.000115	0.0162	1.67	9811	345	900	53	[Ptger4 - prostaglandin e receptor 4 (subtype ep4), Gpam - glycerol-3-phosphate acyltransferase, mitochondrial, Atp6ap1 - atpase, h+ transporting, lysosomal accessory protein 1, Crlf2 - cytokine receptor-like factor 2, Cyp2j6 - cytochrome p450, family 2, subfamily j, polypeptide 6, Ddx58 - dead (asp-glu-ala-asp) box polypeptide 58, Entpd1 - ectonucleoside triphosphate diphosphohydrolase 1, Cd38 -…
GO:0071773	cellular response to BMP stimulus	0.000115	0.0161	7.79	9811	7	900	5	[Acvr2a - activin receptor iia, Dlx1 - distal-less homeobox 1, Runx2 - runt related transcription factor 2, Adamts7 - a disintegrin-like and metallopeptidase (reprolysin type) with thrombospondin type 1 motif, 7, Heyl - hairy/enhancer-of-split related with yrpw motif-like]
GO:0071772	response to BMP	0.000115	0.016	7.79	9811	7	900	5	[Acvr2a - activin receptor iia, Dlx1 - distal-less homeobox 1, Runx2 - runt related transcription factor 2, Adamts7 - a disintegrin-like and metallopeptidase (reprolysin type) with thrombospondin type 1 motif, 7, Heyl - hairy/enhancer-of-split related with yrpw motif-like]
GO:0016339	calcium-dependent cell-cell adhesion via plasma membrane cell adhesion molecules	0.000115	0.0158	7.79	9811	7	900	5	[Arvcf - armadillo repeat gene deleted in velo-cardio-facial syndrome, Nrxn1 - neurexin i, Cdh17 - cadherin 17, Sell - selectin, lymphocyte, Ceacam1 - carcinoembryonic antigen-related cell adhesion molecule 1]
GO:0042742	defense response to bacterium	0.000119	0.0162	2.53	9811	82	900	19	[Anxa3 - annexin a3, Hp - haptoglobin, Hist1h2bc - histone cluster 1, h2bc, Mr1 - major histocompatibility complex, class i-related, Optn - optineurin, Slpi - secretory leukocyte peptidase inhibitor, Myo1f - myosin if, Gbp2 - guanylate binding protein 2, Elane - elastase, neutrophil expressed, Rnase6 - ribonuclease, rnase a family, 6, Pla2g6 - phospholipase a2, group vi, Mpo - myeloperoxidase, Ri…
GO:0001505	regulation of neurotransmitter levels	0.000138	0.0185	2.15	9811	132	900	26	[Ptger4 - prostaglandin e receptor 4 (subtype ep4), Ticam1 - toll-like receptor adaptor molecule 1, Colq - collagen-like tail subunit (single strand of homotrimer) of asymmetric acetylcholinesterase, Atp2b4 - atpase, ca++ transporting, plasma membrane 4, Tlr6 - toll-like receptor 6, Fbxl20 - f-box and leucine-rich repeat protein 20, Nrxn1 - neurexin i, Ulbp1 - ul16 binding protein 1, Cplx2 - comp…
GO:0051094	positive regulation of developmental process	0.000141	0.0187	1.45	9811	693	900	92	[Gpam - glycerol-3-phosphate acyltransferase, mitochondrial, Il15 - interleukin 15, Lig4 - ligase iv, dna, atp-dependent, Ptger4 - prostaglandin e receptor 4 (subtype ep4), Gdi1 - guanosine diphosphate (gdp) dissociation inhibitor 1, Atp6ap1 - atpase, h+ transporting, lysosomal accessory protein 1, Trf - transferrin, Prkd2 - protein kinase d2, Hipk2 - homeodomain interacting protein kinase 2, Tra…
GO:0050794	regulation of cellular process	0.000143	0.0188	1.12	9811	4946	900	506	[Ptger4 - prostaglandin e receptor 4 (subtype ep4), Akna - at-hook transcription factor, Abcg1 - atp-binding cassette, sub-family g (white), member 1, Cyp2j6 - cytochrome p450, family 2, subfamily j, polypeptide 6, Lrig2 - leucine-rich repeats and immunoglobulin-like domains 2, Coro1b - coronin, actin binding protein 1b, H2-Oa - histocompatibility 2, o region alpha locus, Ptbp1 - polypyrimidine t…
GO:0001934	positive regulation of protein phosphorylation	0.000155	0.0202	1.55	9811	470	900	67	[Ptger4 - prostaglandin e receptor 4 (subtype ep4), Il15 - interleukin 15, Fas - fas (tnf receptor superfamily member 6), Atp6ap1 - atpase, h+ transporting, lysosomal accessory protein 1, Trf - transferrin, Prkd2 - protein kinase d2, Hipk2 - homeodomain interacting protein kinase 2, Atp2b4 - atpase, ca++ transporting, plasma membrane 4, Tlr6 - toll-like receptor 6, Pik3cg - phosphoinositide-3-kin…
GO:0002237	response to molecule of bacterial origin	0.000157	0.0202	2.13	9811	133	900	26	[Plscr1 - phospholipid scramblase 1, Chmp5 - charged multivesicular body protein 5, Ptger4 - prostaglandin e receptor 4 (subtype ep4), Ticam1 - toll-like receptor adaptor molecule 1, Elane - elastase, neutrophil expressed, Nlrc3 - nlr family, card domain containing 3, Tlr6 - toll-like receptor 6, Cdc73 - cell division cycle 73, paf1/rna polymerase ii complex component, Jun - jun oncogene, Irak3 -…
GO:0006954	inflammatory response	0.000157	0.02	2.13	9811	133	900	26	[Plscr1 - phospholipid scramblase 1, Ptger4 - prostaglandin e receptor 4 (subtype ep4), Lat - linker for activation of t cells, Ticam1 - toll-like receptor adaptor molecule 1, Crlf2 - cytokine receptor-like factor 2, Notch1 - notch 1, Elane - elastase, neutrophil expressed, Lipa - lysosomal acid lipase a, Tlr6 - toll-like receptor 6, Hyal1 - hyaluronoglucosaminidase 1, Hdac7 - histone deacetylase…
GO:0048731	system development	0.00016	0.0202	1.71	9811	299	900	47	[Lig4 - ligase iv, dna, atp-dependent, Pcnt - pericentrin (kendrin), Zeb1 - zinc finger e-box binding homeobox 1, Ttc21b - tetratricopeptide repeat domain 21b, Mtss1 - metastasis suppressor 1, Itgb4 - integrin beta 4, Tcf4 - transcription factor 4, Cyfip1 - cytoplasmic fmr1 interacting protein 1, Cdkn1c - cyclin-dependent kinase inhibitor 1c (p57), Mbd5 - methyl-cpg binding domain protein 5, Camk…
GO:0032755	positive regulation of interleukin-6 production	0.000164	0.0204	3.27	9811	40	900	12	[Tnfsf9 - tumor necrosis factor (ligand) superfamily, member 9, Il1rap - interleukin 1 receptor accessory protein, Ripk2 - receptor (tnfrsf)-interacting serine-threonine kinase 2, Zbtb20 - zinc finger and btb domain containing 20, Il33 - interleukin 33, Ticam1 - toll-like receptor adaptor molecule 1, Tirap - toll-interleukin 1 receptor (tir) domain-containing adaptor protein, Ddx58 - dead (asp-gl…
GO:1902533	positive regulation of intracellular signal transduction	0.000165	0.0204	1.55	9811	471	900	67	[Plscr1 - phospholipid scramblase 1, Ptger4 - prostaglandin e receptor 4 (subtype ep4), Il15 - interleukin 15, Atp6ap1 - atpase, h+ transporting, lysosomal accessory protein 1, Trf - transferrin, Prkd2 - protein kinase d2, Crlf2 - cytokine receptor-like factor 2, Hipk2 - homeodomain interacting protein kinase 2, Tradd - tnfrsf1a-associated via death domain, Trip6 - thyroid hormone receptor intera…
GO:0008277	regulation of G protein-coupled receptor signaling pathway	0.000173	0.0212	2.93	9811	52	900	14	[Aipl1 - aryl hydrocarbon receptor-interacting protein-like 1, Pde4b - phosphodiesterase 4b, camp specific, Arrdc3 - arrestin domain containing 3, Rgs8 - regulator of g-protein signaling 8, Tulp3 - tubby-like protein 3, Atp2b4 - atpase, ca++ transporting, plasma membrane 4, Dgkq - diacylglycerol kinase, theta, Rgs1 - regulator of g-protein signaling 1, Rgs14 - regulator of g-protein signaling 14,…
GO:0007186	G protein-coupled receptor signaling pathway	0.000181	0.022	2.05	9811	149	900	28	[Ptger4 - prostaglandin e receptor 4 (subtype ep4), Spns2 - spinster homolog 2, Entpd1 - ectonucleoside triphosphate diphosphohydrolase 1, Dgkq - diacylglycerol kinase, theta, Nmb - neuromedin b, Flna - filamin, alpha, Pik3cg - phosphoinositide-3-kinase, catalytic, gamma polypeptide, Ccl9 - chemokine (c-c motif) ligand 9, Smo - smoothened homolog (drosophila), Dgka - diacylglycerol kinase, alpha,…
GO:0051046	regulation of secretion	0.000192	0.0231	1.62	9811	369	900	55	[Ptger4 - prostaglandin e receptor 4 (subtype ep4), Gpam - glycerol-3-phosphate acyltransferase, mitochondrial, Atp6ap1 - atpase, h+ transporting, lysosomal accessory protein 1, Crlf2 - cytokine receptor-like factor 2, Cyp2j6 - cytochrome p450, family 2, subfamily j, polypeptide 6, Ddx58 - dead (asp-glu-ala-asp) box polypeptide 58, Entpd1 - ectonucleoside triphosphate diphosphohydrolase 1, Cd38 -…
GO:0007600	sensory perception	0.000203	0.0242	2.26	9811	106	900	22	[Eps8l2 - eps8-like 2, Aipl1 - aryl hydrocarbon receptor-interacting protein-like 1, Pde4a - phosphodiesterase 4a, camp specific, Rdh10 - retinol dehydrogenase 10 (all-trans), Cabp4 - calcium binding protein 4, Myo7a - myosin viia, Cngb1 - cyclic nucleotide gated channel beta 1, Usp53 - ubiquitin specific peptidase 53, Dlg2 - discs, large homolog 2 (drosophila), Hexb - hexosaminidase b, Lef1 - ly…
GO:0050789	regulation of biological process	0.000204	0.024	1.11	9811	5235	900	531	[Ptger4 - prostaglandin e receptor 4 (subtype ep4), Akna - at-hook transcription factor, Rnf135 - ring finger protein 135, Abcg1 - atp-binding cassette, sub-family g (white), member 1, Cyp2j6 - cytochrome p450, family 2, subfamily j, polypeptide 6, H2-T10 - histocompatibility 2, t region locus 10, Lrig2 - leucine-rich repeats and immunoglobulin-like domains 2, H2-Ob - histocompatibility 2, o regi…
GO:0043408	regulation of MAPK cascade	0.000208	0.0244	1.65	9811	336	900	51	[Fas - fas (tnf receptor superfamily member 6), Atp6ap1 - atpase, h+ transporting, lysosomal accessory protein 1, Lax1 - lymphocyte transmembrane adaptor 1, Tbc1d10c - tbc1 domain family, member 10c, Trf - transferrin, Prkd2 - protein kinase d2, Hipk2 - homeodomain interacting protein kinase 2, Tlr6 - toll-like receptor 6, Trib3 - tribbles homolog 3 (drosophila), Pik3cg - phosphoinositide-3-kinas…
GO:0034754	cellular hormone metabolic process	0.000233	0.0271	3.92	9811	25	900	9	[Rdh12 - retinol dehydrogenase 12, Esr1 - estrogen receptor 1 (alpha), Sgpl1 - sphingosine phosphate lyase 1, Rdh10 - retinol dehydrogenase 10 (all-trans), Ugt1a7c - udp glucuronosyltransferase 1 family, polypeptide a7c, Spp1 - secreted phosphoprotein 1, Hsd17b11 - hydroxysteroid (17-beta) dehydrogenase 11, Retsat - retinol saturase (all trans retinol 13,14 reductase), Rbp1 - retinol binding prot…
GO:0030048	actin filament-based movement	0.000233	0.0268	3.92	9811	25	900	9	[Myl6 - myosin, light polypeptide 6, alkali, smooth muscle and non-muscle, Apbb1 - amyloid beta (a4) precursor protein-binding, family b, member 1, Myo7a - myosin viia, Actn4 - actinin alpha 4, Tpm1 - tropomyosin 1, alpha, Myo19 - myosin xix, Epb4.1l5 - erythrocyte protein band 4.1-like 5, Myl6b - myosin, light polypeptide 6b, Syne2 - spectrin repeat containing, nuclear envelope 2]
GO:0048513	animal organ development	0.000247	0.0281	1.48	9811	576	900	78	[Il15 - interleukin 15, Ptger4 - prostaglandin e receptor 4 (subtype ep4), Fas - fas (tnf receptor superfamily member 6), Spns2 - spinster homolog 2, Hsd11b1 - hydroxysteroid 11-beta dehydrogenase 1, Lipa - lysosomal acid lipase a, Jup - junction plakoglobin, Jun - jun oncogene, E2f7 - e2f transcription factor 7, Smo - smoothened homolog (drosophila), Ptch1 - patched homolog 1, Crip2 - cysteine r…
GO:0048585	negative regulation of response to stimulus	0.000262	0.0296	1.38	9811	845	900	107	[Ptger4 - prostaglandin e receptor 4 (subtype ep4), Oxr1 - oxidation resistance 1, Arhgap25 - rho gtpase activating protein 25, Cyp2j6 - cytochrome p450, family 2, subfamily j, polypeptide 6, Atp2b4 - atpase, ca++ transporting, plasma membrane 4, Hk3 - hexokinase 3, Lrig2 - leucine-rich repeats and immunoglobulin-like domains 2, Coro1b - coronin, actin binding protein 1b, Fbp1 - fructose bisphosp…
GO:0071417	cellular response to organonitrogen compound	0.000264	0.0296	1.88	9811	191	900	33	[Chmp5 - charged multivesicular body protein 5, Gpam - glycerol-3-phosphate acyltransferase, mitochondrial, Zeb1 - zinc finger e-box binding homeobox 1, Zfp36l1 - zinc finger protein 36, c3h type-like 1, Anxa5 - annexin a5, Cyfip1 - cytoplasmic fmr1 interacting protein 1, Spidr - scaffolding protein involved i dna repair, Atp2b4 - atpase, ca++ transporting, plasma membrane 4, Tlr6 - toll-like rec…
GO:0050708	regulation of protein secretion	0.000268	0.0297	1.83	9811	215	900	36	[Gpam - glycerol-3-phosphate acyltransferase, mitochondrial, Ptger4 - prostaglandin e receptor 4 (subtype ep4), Anxa5 - annexin a5, Glul - glutamate-ammonia ligase (glutamine synthetase), Tcf7l2 - transcription factor 7 like 2, t cell specific, hmg box, Dnajc1 - dnaj (hsp40) homolog, subfamily c, member 1, Crlf2 - cytokine receptor-like factor 2, Cyp2j6 - cytochrome p450, family 2, subfamily j, p…
GO:0050778	positive regulation of immune response	0.000273	0.03	1.7	9811	289	900	45	[Plscr1 - phospholipid scramblase 1, Zap70 - zeta-chain (tcr) associated protein kinase, Pik3ap1 - phosphoinositide-3-kinase adaptor protein 1, Il15 - interleukin 15, Klrb1c - killer cell lectin-like receptor subfamily b member 1c, Lax1 - lymphocyte transmembrane adaptor 1, Alpk1 - alpha-kinase 1, Ticam1 - toll-like receptor adaptor molecule 1, Prkd2 - protein kinase d2, Ddx58 - dead (asp-glu-ala…
GO:0042445	hormone metabolic process	0.000275	0.03	2.95	9811	48	900	13	[Sgpl1 - sphingosine phosphate lyase 1, Rdh10 - retinol dehydrogenase 10 (all-trans), Hsd11b1 - hydroxysteroid 11-beta dehydrogenase 1, Rbp1 - retinol binding protein 1, cellular, Rdh12 - retinol dehydrogenase 12, Esr1 - estrogen receptor 1 (alpha), Ugt1a7c - udp glucuronosyltransferase 1 family, polypeptide a7c, Spp1 - secreted phosphoprotein 1, Hsd17b11 - hydroxysteroid (17-beta) dehydrogenase …
GO:0080134	regulation of response to stress	0.000276	0.0298	1.41	9811	734	900	95	[Plscr1 - phospholipid scramblase 1, Il15 - interleukin 15, Ptger4 - prostaglandin e receptor 4 (subtype ep4), Fas - fas (tnf receptor superfamily member 6), Oxr1 - oxidation resistance 1, Trf - transferrin, Rnf135 - ring finger protein 135, Hipk2 - homeodomain interacting protein kinase 2, Tradd - tnfrsf1a-associated via death domain, Ddx58 - dead (asp-glu-ala-asp) box polypeptide 58, Spidr - sc…
GO:0016042	lipid catabolic process	0.000286	0.0307	2.13	9811	123	900	24	[Cyp4f18 - cytochrome p450, family 4, subfamily f, polypeptide 18, Smpdl3a - sphingomyelin phosphodiesterase, acid-like 3a, Pafah1b3 - platelet-activating factor acetylhydrolase, isoform 1b, subunit 3, Crot - carnitine o-octanoyltransferase, Echs1 - enoyl coenzyme a hydratase, short chain, 1, mitochondrial, Sgpl1 - sphingosine phosphate lyase 1, Eci1 - enoyl-coenzyme a delta isomerase 1, Cyp39a1 …
GO:0001819	positive regulation of cytokine production	0.000294	0.0313	1.83	9811	208	900	35	[Il15 - interleukin 15, Ptger4 - prostaglandin e receptor 4 (subtype ep4), Zbtb20 - zinc finger and btb domain containing 20, Ticam1 - toll-like receptor adaptor molecule 1, Rnf135 - ring finger protein 135, Prkd2 - protein kinase d2, Crlf2 - cytokine receptor-like factor 2, Cyp2j6 - cytochrome p450, family 2, subfamily j, polypeptide 6, Ccm2l - cerebral cavernous malformation 2-like, Ddx58 - dea…
GO:2000145	regulation of cell motility	0.000314	0.0331	1.54	9811	446	900	63	[Ptger4 - prostaglandin e receptor 4 (subtype ep4), Grb7 - growth factor receptor bound protein 7, Fas - fas (tnf receptor superfamily member 6), Trf - transferrin, Prkd2 - protein kinase d2, Tradd - tnfrsf1a-associated via death domain, Trip6 - thyroid hormone receptor interactor 6, Ddx58 - dead (asp-glu-ala-asp) box polypeptide 58, Elane - elastase, neutrophil expressed, Camk2b - calcium/calmod…
GO:0002438	acute inflammatory response to antigenic stimulus	0.000326	0.0341	8.72	9811	5	900	4	[Ephb6 - eph receptor b6, Fcgr3 - fc receptor, igg, low affinity iii, Elane - elastase, neutrophil expressed, Serpinb9 - serine (or cysteine) peptidase inhibitor, clade b, member 9]
GO:0031017	exocrine pancreas development	0.000326	0.0338	8.72	9811	5	900	4	[Wls - wntless homolog (drosophila), Igf1 - insulin-like growth factor 1, Igf1r - insulin-like growth factor i receptor, Insr - insulin receptor]
GO:0002274	myeloid leukocyte activation	0.000328	0.0338	2.77	9811	55	900	14	[Anxa3 - annexin a3, Lat - linker for activation of t cells, Fcgr3 - fc receptor, igg, low affinity iii, Ticam1 - toll-like receptor adaptor molecule 1, Dock2 - dedicator of cyto-kinesis 2, Myo1f - myosin if, Tlr6 - toll-like receptor 6, Tnfsf9 - tumor necrosis factor (ligand) superfamily, member 9, Jun - jun oncogene, Il33 - interleukin 33, Kmt2e - lysine (k)-specific methyltransferase 2e, Cplx2…
GO:0032350	regulation of hormone metabolic process	0.000334	0.0341	4.15	9811	21	900	8	[Gfi1 - growth factor independent 1, Rdh10 - retinol dehydrogenase 10 (all-trans), Tcf7l2 - transcription factor 7 like 2, t cell specific, hmg box, Igf1 - insulin-like growth factor 1, Igf1r - insulin-like growth factor i receptor, Egr1 - early growth response 1, Dkk3 - dickkopf homolog 3 (xenopus laevis), Dgkq - diacylglycerol kinase, theta]
GO:0002275	myeloid cell activation involved in immune response	0.000334	0.0338	4.15	9811	21	900	8	[Anxa3 - annexin a3, Lat - linker for activation of t cells, Il33 - interleukin 33, Ticam1 - toll-like receptor adaptor molecule 1, Dock2 - dedicator of cyto-kinesis 2, Cplx2 - complexin 2, Myo1f - myosin if, Tyrobp - tyro protein tyrosine kinase binding protein]
GO:0033993	response to lipid	0.000347	0.0349	1.71	9811	267	900	42	[Plscr1 - phospholipid scramblase 1, Anxa3 - annexin a3, Ptger4 - prostaglandin e receptor 4 (subtype ep4), Chmp5 - charged multivesicular body protein 5, Fas - fas (tnf receptor superfamily member 6), Zfp36l1 - zinc finger protein 36, c3h type-like 1, Phc1 - polyhomeotic-like 1 (drosophila), Ticam1 - toll-like receptor adaptor molecule 1, Abcg1 - atp-binding cassette, sub-family g (white), membe…
GO:0045216	cell-cell junction organization	0.000347	0.0346	3.04	9811	43	900	12	[Flna - filamin, alpha, Jup - junction plakoglobin, Arvcf - armadillo repeat gene deleted in velo-cardio-facial syndrome, Prtn3 - proteinase 3, Pkp3 - plakophilin 3, Cdh17 - cadherin 17, Ect2 - ect2 oncogene, Actn4 - actinin alpha 4, Micall2 - mical-like 2, Tbcd - tubulin-specific chaperone d, Ceacam1 - carcinoembryonic antigen-related cell adhesion molecule 1, Hdac7 - histone deacetylase 7]
GO:0043406	positive regulation of MAP kinase activity	0.000353	0.0349	2.18	9811	110	900	22	[Dab2ip - disabled 2 interacting protein, Pik3r5 - phosphoinositide-3-kinase, regulatory subunit 5, p101, Taok2 - tao kinase 2, Trf - transferrin, Ripk1 - receptor (tnfrsf)-interacting serine-threonine kinase 1, Dvl2 - dishevelled 2, dsh homolog (drosophila), Insr - insulin receptor, Tlr6 - toll-like receptor 6, Pik3cg - phosphoinositide-3-kinase, catalytic, gamma polypeptide, Map4k2 - mitogen-ac…
GO:0002250	adaptive immune response	0.000353	0.0346	2.18	9811	110	900	22	[Zap70 - zeta-chain (tcr) associated protein kinase, Lat - linker for activation of t cells, Fas - fas (tnf receptor superfamily member 6), Klhl6 - kelch-like 6, Ephb6 - eph receptor b6, Fcgr3 - fc receptor, igg, low affinity iii, Lax1 - lymphocyte transmembrane adaptor 1, Il18bp - interleukin 18 binding protein, Prkd2 - protein kinase d2, Mfsd6 - major facilitator superfamily domain containing 6…
GO:1990266	neutrophil migration	0.000397	0.0387	3.41	9811	32	900	10	[Pde4b - phosphodiesterase 4b, camp specific, Itgam - integrin alpha m, Ccl9 - chemokine (c-c motif) ligand 9, Prtn3 - proteinase 3, Fcgr3 - fc receptor, igg, low affinity iii, Spp1 - secreted phosphoprotein 1, Trem1 - triggering receptor expressed on myeloid cells 1, Irak4 - interleukin-1 receptor-associated kinase 4, Trem3 - triggering receptor expressed on myeloid cells 3, Itgb2 - integrin bet…
GO:0051050	positive regulation of transport	0.000411	0.0398	1.5	9811	495	900	68	[Arc - activity regulated cytoskeletal-associated protein, Ptger4 - prostaglandin e receptor 4 (subtype ep4), Atp6ap1 - atpase, h+ transporting, lysosomal accessory protein 1, Trf - transferrin, Abcg1 - atp-binding cassette, sub-family g (white), member 1, Crlf2 - cytokine receptor-like factor 2, Cyp2j6 - cytochrome p450, family 2, subfamily j, polypeptide 6, Ddx58 - dead (asp-glu-ala-asp) box po…
GO:0042327	positive regulation of phosphorylation	0.000461	0.0442	1.49	9811	497	900	68	[Ptger4 - prostaglandin e receptor 4 (subtype ep4), Il15 - interleukin 15, Fas - fas (tnf receptor superfamily member 6), Atp6ap1 - atpase, h+ transporting, lysosomal accessory protein 1, Trf - transferrin, Prkd2 - protein kinase d2, Hipk2 - homeodomain interacting protein kinase 2, Atp2b4 - atpase, ca++ transporting, plasma membrane 4, Tlr6 - toll-like receptor 6, Pik3cg - phosphoinositide-3-kin…
GO:0032675	regulation of interleukin-6 production	0.000475	0.0453	2.49	9811	70	900	16	[Zbtb20 - zinc finger and btb domain containing 20, Ticam1 - toll-like receptor adaptor molecule 1, Trim30a - tripartite motif-containing 30a, Ddx58 - dead (asp-glu-ala-asp) box polypeptide 58, Nlrc3 - nlr family, card domain containing 3, Tlr6 - toll-like receptor 6, Tnfsf9 - tumor necrosis factor (ligand) superfamily, member 9, Il1rap - interleukin 1 receptor accessory protein, Ripk2 - receptor…
GO:0006935	chemotaxis	0.000477	0.0451	2.18	9811	105	900	21	[Pde4b - phosphodiesterase 4b, camp specific, Itgam - integrin alpha m, Fcgr3 - fc receptor, igg, low affinity iii, Slit1 - slit homolog 1 (drosophila), Trem1 - triggering receptor expressed on myeloid cells 1, Dock2 - dedicator of cyto-kinesis 2, Trem3 - triggering receptor expressed on myeloid cells 3, Lef1 - lymphoid enhancer binding factor 1, Itgb2 - integrin beta 2, Pla2g6 - phospholipase a2…
GO:0006942	regulation of striated muscle contraction	0.000483	0.0453	3.96	9811	22	900	8	[Flna - filamin, alpha, Smtn - smoothelin, Jup - junction plakoglobin, Pde4b - phosphodiesterase 4b, camp specific, Pde5a - phosphodiesterase 5a, cgmp-specific, Grcc10 - gene rich cluster, c10 gene, Atp1b1 - atpase, na+/k+ transporting, beta 1 polypeptide, Rgs2 - regulator of g-protein signaling 2]
GO:0050679	positive regulation of epithelial cell proliferation	0.000493	0.046	2.41	9811	77	900	17	[Kdm5b - lysine (k)-specific demethylase 5b, Tcf7l2 - transcription factor 7 like 2, t cell specific, hmg box, Glul - glutamate-ammonia ligase (glutamine synthetase), Prkd2 - protein kinase d2, Notch1 - notch 1, Eya1 - eyes absent 1 homolog (drosophila), Hyal1 - hyaluronoglucosaminidase 1, Esr1 - estrogen receptor 1 (alpha), Jun - jun oncogene, Smo - smoothened homolog (drosophila), Igf1 - insuli…
GO:0002791	regulation of peptide secretion	0.000495	0.0458	1.75	9811	230	900	37	[Gpam - glycerol-3-phosphate acyltransferase, mitochondrial, Ptger4 - prostaglandin e receptor 4 (subtype ep4), Anxa5 - annexin a5, Glul - glutamate-ammonia ligase (glutamine synthetase), Tcf7l2 - transcription factor 7 like 2, t cell specific, hmg box, Dnajc1 - dnaj (hsp40) homolog, subfamily c, member 1, Crlf2 - cytokine receptor-like factor 2, Cyp2j6 - cytochrome p450, family 2, subfamily j, p…
GO:0045087	innate immune response	0.000515	0.0473	1.8	9811	206	900	34	[Hist1h2bc - histone cluster 1, h2bc, Trim14 - tripartite motif-containing 14, Alpk1 - alpha-kinase 1, Mr1 - major histocompatibility complex, class i-related, Trim56 - tripartite motif-containing 56, Ticam1 - toll-like receptor adaptor molecule 1, Rnf135 - ring finger protein 135, Trim30a - tripartite motif-containing 30a, Tnfaip8l2 - tumor necrosis factor, alpha-induced protein 8-like 2, Ddx58 …
GO:0044093	positive regulation of molecular function	0.000516	0.0471	1.36	9811	832	900	104	[Arc - activity regulated cytoskeletal-associated protein, Fas - fas (tnf receptor superfamily member 6), Prkd2 - protein kinase d2, Tradd - tnfrsf1a-associated via death domain, Ddx58 - dead (asp-glu-ala-asp) box polypeptide 58, Atp2b4 - atpase, ca++ transporting, plasma membrane 4, Camk2b - calcium/calmodulin-dependent protein kinase ii, beta, Plxnd1 - plexin d1, Pik3cg - phosphoinositide-3-kin…
GO:0042325	regulation of phosphorylation	0.000526	0.0476	1.36	9811	823	900	103	[Ptger4 - prostaglandin e receptor 4 (subtype ep4), Fas - fas (tnf receptor superfamily member 6), Prkd2 - protein kinase d2, Atp2b4 - atpase, ca++ transporting, plasma membrane 4, Pik3cg - phosphoinositide-3-kinase, catalytic, gamma polypeptide, Fbp1 - fructose bisphosphatase 1, Nrxn1 - neurexin i, Pde5a - phosphodiesterase 5a, cgmp-specific, Hspa2 - heat shock protein 2, Phlpp1 - ph domain and …
GO:0022610	biological adhesion	0.000529	0.0476	1.73	9811	239	900	38	[Anxa3 - annexin a3, Anxa9 - annexin a9, Zfp36l1 - zinc finger protein 36, c3h type-like 1, Itgb4 - integrin beta 4, Pear1 - platelet endothelial aggregation receptor 1, Icam2 - intercellular adhesion molecule 2, Atp1b1 - atpase, na+/k+ transporting, beta 1 polypeptide, Prkd2 - protein kinase d2, Trip6 - thyroid hormone receptor interactor 6, Dlg2 - discs, large homolog 2 (drosophila), Klra1 - ki…
GO:0033674	positive regulation of kinase activity	0.000531	0.0475	1.69	9811	264	900	41	[Lat - linker for activation of t cells, Prlr - prolactin receptor, Trf - transferrin, Atp2b4 - atpase, ca++ transporting, plasma membrane 4, Tlr6 - toll-like receptor 6, Pik3cg - phosphoinositide-3-kinase, catalytic, gamma polypeptide, Pde5a - phosphodiesterase 5a, cgmp-specific, Nrxn1 - neurexin i, Ect2 - ect2 oncogene, Cass4 - cas scaffolding protein family member 4, Stox1 - storkhead box 1, C…
GO:0042330	taxis	0.000544	0.0483	2.16	9811	106	900	21	[Pde4b - phosphodiesterase 4b, camp specific, Itgam - integrin alpha m, Fcgr3 - fc receptor, igg, low affinity iii, Slit1 - slit homolog 1 (drosophila), Trem1 - triggering receptor expressed on myeloid cells 1, Dock2 - dedicator of cyto-kinesis 2, Trem3 - triggering receptor expressed on myeloid cells 3, Lef1 - lymphoid enhancer binding factor 1, Itgb2 - integrin beta 2, Pla2g6 - phospholipase a2…
GO:0030334	regulation of cell migration	0.000558	0.0492	1.53	9811	420	900	59	[Ptger4 - prostaglandin e receptor 4 (subtype ep4), Grb7 - growth factor receptor bound protein 7, Fas - fas (tnf receptor superfamily member 6), Prkd2 - protein kinase d2, Tradd - tnfrsf1a-associated via death domain, Trip6 - thyroid hormone receptor interactor 6, Ddx58 - dead (asp-glu-ala-asp) box polypeptide 58, Elane - elastase, neutrophil expressed, Camk2b - calcium/calmodulin-dependent prot…
GO:0032496	response to lipopolysaccharide	0.000561	0.0491	2.07	9811	121	900	23	[Dab2ip - disabled 2 interacting protein, Plscr1 - phospholipid scramblase 1, Pde2a - phosphodiesterase 2a, cgmp-stimulated, Ptger4 - prostaglandin e receptor 4 (subtype ep4), Pde4b - phosphodiesterase 4b, camp specific, Chmp5 - charged multivesicular body protein 5, Gng12 - guanine nucleotide binding protein (g protein), gamma 12, Ticam1 - toll-like receptor adaptor molecule 1, Mgst1 - microsoma…
GO:0010648	negative regulation of cell communication	0.000585	0.0509	1.4	9811	694	900	89	[Rasa3 - ras p21 protein activator 3, Lax1 - lymphocyte transmembrane adaptor 1, Pear1 - platelet endothelial aggregation receptor 1, Tbc1d10c - tbc1 domain family, member 10c, Tle3 - transducin-like enhancer of split 3, homolog of drosophila e(spl), Cyp2j6 - cytochrome p450, family 2, subfamily j, polypeptide 6, Hipk2 - homeodomain interacting protein kinase 2, Arhgap25 - rho gtpase activating p…
GO:0001913	T cell mediated cytotoxicity	0.000591	0.051	6.06	9811	9	900	5	[Prf1 - perforin 1 (pore forming protein), Raet1d - retinoic acid early transcript delta, Ulbp1 - ul16 binding protein 1, Ctsh - cathepsin h, Serpinb9 - serine (or cysteine) peptidase inhibitor, clade b, member 9]
GO:0030813	positive regulation of nucleotide catabolic process	0.000591	0.0507	6.06	9811	9	900	5	[Zbtb20 - zinc finger and btb domain containing 20, Igf1 - insulin-like growth factor 1, Aaed1 - ahpc/tsa antioxidant enzyme domain containing 1, Insr - insulin receptor, P2rx7 - purinergic receptor p2x, ligand-gated ion channel, 7]
GO:0045821	positive regulation of glycolytic process	0.000591	0.0504	6.06	9811	9	900	5	[Zbtb20 - zinc finger and btb domain containing 20, Igf1 - insulin-like growth factor 1, Insr - insulin receptor, Aaed1 - ahpc/tsa antioxidant enzyme domain containing 1, P2rx7 - purinergic receptor p2x, ligand-gated ion channel, 7]
GO:0051197	positive regulation of coenzyme metabolic process	0.000591	0.05	6.06	9811	9	900	5	[Zbtb20 - zinc finger and btb domain containing 20, Igf1 - insulin-like growth factor 1, Aaed1 - ahpc/tsa antioxidant enzyme domain containing 1, Insr - insulin receptor, P2rx7 - purinergic receptor p2x, ligand-gated ion channel, 7]
GO:0023057	negative regulation of signaling	0.000643	0.0541	1.39	9811	696	900	89	[Rasa3 - ras p21 protein activator 3, Lax1 - lymphocyte transmembrane adaptor 1, Pear1 - platelet endothelial aggregation receptor 1, Tbc1d10c - tbc1 domain family, member 10c, Tle3 - transducin-like enhancer of split 3, homolog of drosophila e(spl), Cyp2j6 - cytochrome p450, family 2, subfamily j, polypeptide 6, Hipk2 - homeodomain interacting protein kinase 2, Arhgap25 - rho gtpase activating p…
GO:0001932	regulation of protein phosphorylation	0.000649	0.0542	1.38	9811	743	900	94	[Il15 - interleukin 15, Ptger4 - prostaglandin e receptor 4 (subtype ep4), Fas - fas (tnf receptor superfamily member 6), Atp6ap1 - atpase, h+ transporting, lysosomal accessory protein 1, Lax1 - lymphocyte transmembrane adaptor 1, Ctdsp2 - ctd (carboxy-terminal domain, rna polymerase ii, polypeptide a) small phosphatase 2, Tbc1d10c - tbc1 domain family, member 10c, Trf - transferrin, Prkd2 - prot…
GO:1901699	cellular response to nitrogen compound	0.000662	0.055	1.76	9811	217	900	35	[Chmp5 - charged multivesicular body protein 5, Gpam - glycerol-3-phosphate acyltransferase, mitochondrial, Zeb1 - zinc finger e-box binding homeobox 1, Zfp36l1 - zinc finger protein 36, c3h type-like 1, Anxa5 - annexin a5, Cyfip1 - cytoplasmic fmr1 interacting protein 1, Ddx58 - dead (asp-glu-ala-asp) box polypeptide 58, Spidr - scaffolding protein involved i dna repair, Atp2b4 - atpase, ca++ tr…
GO:0001894	tissue homeostasis	0.000663	0.0547	2.42	9811	72	900	16	[Aipl1 - aryl hydrocarbon receptor-interacting protein-like 1, Muc13 - mucin 13, epithelial transmembrane, Pla2g4a - phospholipase a2, group iva (cytosolic, calcium-dependent), Notch1 - notch 1, Lpcat1 - lysophosphatidylcholine acyltransferase 1, Lipa - lysosomal acid lipase a, Cd34 - cd34 antigen, Rcn3 - reticulocalbin 3, ef-hand calcium binding domain, Smo - smoothened homolog (drosophila), Trp…
GO:0042127	regulation of cell proliferation	0.000689	0.0565	1.37	9811	782	900	98	[Lig4 - ligase iv, dna, atp-dependent, Ptger4 - prostaglandin e receptor 4 (subtype ep4), Fas - fas (tnf receptor superfamily member 6), Prkd2 - protein kinase d2, Elane - elastase, neutrophil expressed, Flna - filamin, alpha, Dpp4 - dipeptidylpeptidase 4, Pde5a - phosphodiesterase 5a, cgmp-specific, E2f7 - e2f transcription factor 7, Ptch1 - patched homolog 1, Ceacam1 - carcinoembryonic antigen-…
GO:0045664	regulation of neuron differentiation	0.000698	0.0568	1.57	9811	362	900	52	[Arc - activity regulated cytoskeletal-associated protein, Gdi1 - guanosine diphosphate (gdp) dissociation inhibitor 1, Camk2b - calcium/calmodulin-dependent protein kinase ii, beta, Cd38 - cd38 antigen, Lrig2 - leucine-rich repeats and immunoglobulin-like domains 2, Plxnd1 - plexin d1, Flna - filamin, alpha, Ptbp1 - polypyrimidine tract binding protein 1, Cit - citron, Serpini1 - serine (or cyst…
GO:0002449	lymphocyte mediated immunity	0.000698	0.0565	3	9811	40	900	11	[Fas - fas (tnf receptor superfamily member 6), Ephb6 - eph receptor b6, Prf1 - perforin 1 (pore forming protein), Fcgr3 - fc receptor, igg, low affinity iii, Raet1d - retinoic acid early transcript delta, Ulbp1 - ul16 binding protein 1, Crlf2 - cytokine receptor-like factor 2, Ctsh - cathepsin h, Myo1g - myosin ig, Irf7 - interferon regulatory factor 7, Serpinb9 - serine (or cysteine) peptidase …
GO:0010562	positive regulation of phosphorus metabolic process	0.000709	0.057	1.45	9811	532	900	71	[Ptger4 - prostaglandin e receptor 4 (subtype ep4), Il15 - interleukin 15, Fas - fas (tnf receptor superfamily member 6), Atp6ap1 - atpase, h+ transporting, lysosomal accessory protein 1, Trf - transferrin, Prkd2 - protein kinase d2, Hipk2 - homeodomain interacting protein kinase 2, Atp2b4 - atpase, ca++ transporting, plasma membrane 4, Tlr6 - toll-like receptor 6, Pik3cg - phosphoinositide-3-kin…
GO:0045937	positive regulation of phosphate metabolic process	0.000709	0.0567	1.45	9811	532	900	71	[Ptger4 - prostaglandin e receptor 4 (subtype ep4), Il15 - interleukin 15, Fas - fas (tnf receptor superfamily member 6), Atp6ap1 - atpase, h+ transporting, lysosomal accessory protein 1, Trf - transferrin, Prkd2 - protein kinase d2, Hipk2 - homeodomain interacting protein kinase 2, Atp2b4 - atpase, ca++ transporting, plasma membrane 4, Tlr6 - toll-like receptor 6, Pik3cg - phosphoinositide-3-kin…
GO:0055091	phospholipid homeostasis	0.00077	0.0611	10.9	9811	3	900	3	[Gpam - glycerol-3-phosphate acyltransferase, mitochondrial, Rcn3 - reticulocalbin 3, ef-hand calcium binding domain, Abcg1 - atp-binding cassette, sub-family g (white), member 1]
GO:0046069	cGMP catabolic process	0.00077	0.0608	10.9	9811	3	900	3	[Pde2a - phosphodiesterase 2a, cgmp-stimulated, Pde5a - phosphodiesterase 5a, cgmp-specific, Pde9a - phosphodiesterase 9a]
GO:0008016	regulation of heart contraction	0.00078	0.0612	2.67	9811	53	900	13	[Smtn - smoothelin, Pde4b - phosphodiesterase 4b, camp specific, Atp1b1 - atpase, na+/k+ transporting, beta 1 polypeptide, S100a1 - s100 calcium binding protein a1, Rnls - renalase, fad-dependent amine oxidase, Atp2b4 - atpase, ca++ transporting, plasma membrane 4, Tpm1 - tropomyosin 1, alpha, Flna - filamin, alpha, Jup - junction plakoglobin, Pde5a - phosphodiesterase 5a, cgmp-specific, Scn4b - …
GO:0009887	animal organ morphogenesis	0.0008	0.0624	1.76	9811	211	900	34	[Ift80 - intraflagellar transport 80, Zeb1 - zinc finger e-box binding homeobox 1, Pcnt - pericentrin (kendrin), Itgb4 - integrin beta 4, Tcf7l2 - transcription factor 7 like 2, t cell specific, hmg box, Grcc10 - gene rich cluster, c10 gene, Tcf7 - transcription factor 7, t cell specific, Myo7a - myosin viia, Hipk2 - homeodomain interacting protein kinase 2, Tulp3 - tubby-like protein 3, Hyal1 - …
GO:0001817	regulation of cytokine production	0.000803	0.0623	1.58	9811	338	900	49	[Ptger4 - prostaglandin e receptor 4 (subtype ep4), Il15 - interleukin 15, Gpam - glycerol-3-phosphate acyltransferase, mitochondrial, Rnf135 - ring finger protein 135, Prkd2 - protein kinase d2, Cyp2j6 - cytochrome p450, family 2, subfamily j, polypeptide 6, Crlf2 - cytokine receptor-like factor 2, Ccm2l - cerebral cavernous malformation 2-like, Ddx58 - dead (asp-glu-ala-asp) box polypeptide 58,…
GO:0022603	regulation of anatomical structure morphogenesis	0.000803	0.0619	1.47	9811	498	900	67	[Arc - activity regulated cytoskeletal-associated protein, Ptger4 - prostaglandin e receptor 4 (subtype ep4), Gdi1 - guanosine diphosphate (gdp) dissociation inhibitor 1, Prkd2 - protein kinase d2, Hipk2 - homeodomain interacting protein kinase 2, Camk2b - calcium/calmodulin-dependent protein kinase ii, beta, Flna - filamin, alpha, Plxnd1 - plexin d1, Jup - junction plakoglobin, Coro1b - coronin,…
GO:0071902	positive regulation of protein serine/threonine kinase activity	0.000886	0.0679	1.92	9811	148	900	26	[Trf - transferrin, Atp2b4 - atpase, ca++ transporting, plasma membrane 4, Tlr6 - toll-like receptor 6, Pik3cg - phosphoinositide-3-kinase, catalytic, gamma polypeptide, Nrxn1 - neurexin i, Pde5a - phosphodiesterase 5a, cgmp-specific, Ceacam1 - carcinoembryonic antigen-related cell adhesion molecule 1, Maged1 - melanoma antigen, family d, 1, P2rx7 - purinergic receptor p2x, ligand-gated ion chann…
GO:1903522	regulation of blood circulation	0.000891	0.0678	2.44	9811	67	900	15	[Smtn - smoothelin, Pde4b - phosphodiesterase 4b, camp specific, Atp1b1 - atpase, na+/k+ transporting, beta 1 polypeptide, S100a1 - s100 calcium binding protein a1, Rnls - renalase, fad-dependent amine oxidase, Cd38 - cd38 antigen, Atp2b4 - atpase, ca++ transporting, plasma membrane 4, Tpm1 - tropomyosin 1, alpha, Flna - filamin, alpha, Jup - junction plakoglobin, Pde5a - phosphodiesterase 5a, cg…
GO:0043129	surfactant homeostasis	0.000907	0.0687	7.27	9811	6	900	4	[Rcn3 - reticulocalbin 3, ef-hand calcium binding domain, Pla2g4a - phospholipase a2, group iva (cytosolic, calcium-dependent), Ctsh - cathepsin h, Lpcat1 - lysophosphatidylcholine acyltransferase 1]
GO:0042572	retinol metabolic process	0.000907	0.0683	7.27	9811	6	900	4	[Rdh12 - retinol dehydrogenase 12, Rdh10 - retinol dehydrogenase 10 (all-trans), Retsat - retinol saturase (all trans retinol 13,14 reductase), Rbp1 - retinol binding protein 1, cellular]
GO:0070944	neutrophil mediated killing of bacterium	0.000907	0.0679	7.27	9811	6	900	4	[Trem1 - triggering receptor expressed on myeloid cells 1, Ctsg - cathepsin g, Elane - elastase, neutrophil expressed, Trem3 - triggering receptor expressed on myeloid cells 3]
GO:0070942	neutrophil mediated cytotoxicity	0.000907	0.0675	7.27	9811	6	900	4	[Trem1 - triggering receptor expressed on myeloid cells 1, Ctsg - cathepsin g, Elane - elastase, neutrophil expressed, Trem3 - triggering receptor expressed on myeloid cells 3]
GO:0070943	neutrophil mediated killing of symbiont cell	0.000907	0.0671	7.27	9811	6	900	4	[Trem1 - triggering receptor expressed on myeloid cells 1, Ctsg - cathepsin g, Elane - elastase, neutrophil expressed, Trem3 - triggering receptor expressed on myeloid cells 3]
GO:0071867	response to monoamine	0.000923	0.0679	4.67	9811	14	900	6	[Pde4b - phosphodiesterase 4b, camp specific, Gng2 - guanine nucleotide binding protein (g protein), gamma 2, Lrrk2 - leucine-rich repeat kinase 2, Rnls - renalase, fad-dependent amine oxidase, Dnm2 - dynamin 2, Atp2b4 - atpase, ca++ transporting, plasma membrane 4]
GO:0071869	response to catecholamine	0.000923	0.0675	4.67	9811	14	900	6	[Pde4b - phosphodiesterase 4b, camp specific, Gng2 - guanine nucleotide binding protein (g protein), gamma 2, Lrrk2 - leucine-rich repeat kinase 2, Rnls - renalase, fad-dependent amine oxidase, Dnm2 - dynamin 2, Atp2b4 - atpase, ca++ transporting, plasma membrane 4]
GO:0014070	response to organic cyclic compound	0.000939	0.0683	1.66	9811	263	900	40	[Anxa3 - annexin a3, Fas - fas (tnf receptor superfamily member 6), Zfp36l1 - zinc finger protein 36, c3h type-like 1, Ticam1 - toll-like receptor adaptor molecule 1, Ddx58 - dead (asp-glu-ala-asp) box polypeptide 58, Spidr - scaffolding protein involved i dna repair, Dgkq - diacylglycerol kinase, theta, Atp2b4 - atpase, ca++ transporting, plasma membrane 4, Cdkn2d - cyclin-dependent kinase inhib…
GO:0045124	regulation of bone resorption	0.000941	0.068	3.63	9811	24	900	8	[Ptger4 - prostaglandin e receptor 4 (subtype ep4), Atp6ap1 - atpase, h+ transporting, lysosomal accessory protein 1, Trf - transferrin, Spp1 - secreted phosphoprotein 1, Ceacam1 - carcinoembryonic antigen-related cell adhesion molecule 1, S1pr1 - sphingosine-1-phosphate receptor 1, Cd38 - cd38 antigen, P2rx7 - purinergic receptor p2x, ligand-gated ion channel, 7]
GO:0045089	positive regulation of innate immune response	0.000952	0.0685	2.12	9811	103	900	20	[Plscr1 - phospholipid scramblase 1, Zbp1 - z-dna binding protein 1, Pik3ap1 - phosphoinositide-3-kinase adaptor protein 1, Klrb1c - killer cell lectin-like receptor subfamily b member 1c, Alpk1 - alpha-kinase 1, Ticam1 - toll-like receptor adaptor molecule 1, Ddx58 - dead (asp-glu-ala-asp) box polypeptide 58, Dhx58 - dexh (asp-glu-x-his) box polypeptide 58, Tifa - traf-interacting protein with f…
GO:0071407	cellular response to organic cyclic compound	0.000996	0.0712	1.87	9811	157	900	27	[Zfp36l1 - zinc finger protein 36, c3h type-like 1, Ddx58 - dead (asp-glu-ala-asp) box polypeptide 58, Spidr - scaffolding protein involved i dna repair, Atp2b4 - atpase, ca++ transporting, plasma membrane 4, Jup - junction plakoglobin, Pik3cg - phosphoinositide-3-kinase, catalytic, gamma polypeptide, Ptch1 - patched homolog 1, Smo - smoothened homolog (drosophila), Nrip1 - nuclear receptor inter…
GO_FUNCTION
GO Term	Description	P-value	FDR q-value	Enrichment	N	B	n	b	Genes
GO:0005102	signaling receptor binding	2.18e-07	0.000814	1.63	9811	687	900	103	[Sytl1 - synaptotagmin-like 1, Tradd - tnfrsf1a-associated via death domain, Pitpnm1 - phosphatidylinositol transfer protein, membrane-associated 1, H2-T10 - histocompatibility 2, t region locus 10, Lrig2 - leucine-rich repeats and immunoglobulin-like domains 2, Flna - filamin, alpha, Pik3cg - phosphoinositide-3-kinase, catalytic, gamma polypeptide, Dpp4 - dipeptidylpeptidase 4, Nrxn1 - neurexin …
GO:0004888	transmembrane signaling receptor activity	3.75e-07	0.000701	2.46	9811	155	900	35	[Ifnlr1 - interferon lambda receptor 1, Ptger4 - prostaglandin e receptor 4 (subtype ep4), Fas - fas (tnf receptor superfamily member 6), Anxa9 - annexin a9, Prlr - prolactin receptor, Notch1 - notch 1, Crlf2 - cytokine receptor-like factor 2, Tlr6 - toll-like receptor 6, Plxnd1 - plexin d1, Nrxn1 - neurexin i, Ptch1 - patched homolog 1, Smo - smoothened homolog (drosophila), Cd79a - cd79a antige…
GO:0038023	signaling receptor activity	4.03e-07	0.000502	2.15	9811	233	900	46	[Ifnlr1 - interferon lambda receptor 1, Ptger4 - prostaglandin e receptor 4 (subtype ep4), Klrb1c - killer cell lectin-like receptor subfamily b member 1c, Fas - fas (tnf receptor superfamily member 6), Anxa9 - annexin a9, Prlr - prolactin receptor, Pear1 - platelet endothelial aggregation receptor 1, Notch1 - notch 1, Crlf2 - cytokine receptor-like factor 2, Klra1 - killer cell lectin-like recep…
GO:0005509	calcium ion binding	3.26e-06	0.00304	2.15	9811	198	900	39	[Plscr1 - phospholipid scramblase 1, Ehd2 - eh-domain containing 2, Anxa3 - annexin a3, Anxa9 - annexin a9, Anxa5 - annexin a5, Cabp4 - calcium binding protein 4, Actn4 - actinin alpha 4, Notch1 - notch 1, Efhd1 - ef hand domain containing 1, Pitpnm1 - phosphatidylinositol transfer protein, membrane-associated 1, Pls3 - plastin 3 (t-isoform), Mylpf - myosin light chain, phosphorylatable, fast ske…
GO:0060089	molecular transducer activity	4.21e-06	0.00314	1.95	9811	268	900	48	[Ifnlr1 - interferon lambda receptor 1, Ptger4 - prostaglandin e receptor 4 (subtype ep4), Klrb1c - killer cell lectin-like receptor subfamily b member 1c, Fas - fas (tnf receptor superfamily member 6), Anxa9 - annexin a9, Prlr - prolactin receptor, Pear1 - platelet endothelial aggregation receptor 1, Notch1 - notch 1, Crlf2 - cytokine receptor-like factor 2, Klra1 - killer cell lectin-like recep…
GO:0003779	actin binding	1.25e-05	0.00779	2.08	9811	194	900	37	[Smtn - smoothelin, Eps8l2 - eps8-like 2, Arc - activity regulated cytoskeletal-associated protein, Mtss1 - metastasis suppressor 1, Plec - plectin, Actn4 - actinin alpha 4, Hcls1 - hematopoietic cell specific lyn substrate 1, Myo7a - myosin viia, Cyfip1 - cytoplasmic fmr1 interacting protein 1, Rcsd1 - rcsd domain containing 1, Myo1f - myosin if, Pls3 - plastin 3 (t-isoform), Myo19 - myosin xix,…
GO:0019900	kinase binding	9.15e-05	0.0488	1.53	9811	541	900	76	[Grb7 - growth factor receptor bound protein 7, Fas - fas (tnf receptor superfamily member 6), Lax1 - lymphocyte transmembrane adaptor 1, Prkd2 - protein kinase d2, Tradd - tnfrsf1a-associated via death domain, Trip6 - thyroid hormone receptor interactor 6, Pitpnm1 - phosphatidylinositol transfer protein, membrane-associated 1, Atp2b4 - atpase, ca++ transporting, plasma membrane 4, Camk2b - calci…
GO:0008092	cytoskeletal protein binding	0.000151	0.0704	1.54	9811	496	900	70	[Smtn - smoothelin, Arc - activity regulated cytoskeletal-associated protein, Rcsd1 - rcsd domain containing 1, Syne2 - spectrin repeat containing, nuclear envelope 2, Flna - filamin, alpha, Capza1 - capping protein (actin filament) muscle z-line, alpha 1, Coro1b - coronin, actin binding protein 1b, Spata6 - spermatogenesis associated 6, Hspa2 - heat shock protein 2, Stau2 - staufen (rna binding …
GO:0043548	phosphatidylinositol 3-kinase binding	0.000163	0.0674	4.09	9811	24	900	9	[Dab2ip - disabled 2 interacting protein, Pik3ap1 - phosphoinositide-3-kinase adaptor protein 1, Esr1 - estrogen receptor 1 (alpha), Irs2 - insulin receptor substrate 2, Igf1r - insulin-like growth factor i receptor, Dnm2 - dynamin 2, Insr - insulin receptor, Nlrc3 - nlr family, card domain containing 3, Pik3ip1 - phosphoinositide-3-kinase interacting protein 1]
GO:0005515	protein binding	0.000237	0.0885	1.11	9811	4890	900	499	[Sytl1 - synaptotagmin-like 1, Rnf135 - ring finger protein 135, Abcg1 - atp-binding cassette, sub-family g (white), member 1, H2-T10 - histocompatibility 2, t region locus 10, Lrig2 - leucine-rich repeats and immunoglobulin-like domains 2, Coro1b - coronin, actin binding protein 1b, Ptbp1 - polypyrimidine tract binding protein 1, Otub2 - otu domain, ubiquitin aldehyde binding 2, Ptch1 - patched …
GO:0005158	insulin receptor binding	0.000291	0.0988	4.77	9811	16	900	7	[Enpp1 - ectonucleotide pyrophosphatase/phosphodiesterase 1, Irs2 - insulin receptor substrate 2, Igf1 - insulin-like growth factor 1, Igf1r - insulin-like growth factor i receptor, Phip - pleckstrin homology domain interacting protein, Lmbrd1 - lmbr1 domain containing 1, Sorbs1 - sorbin and sh3 domain containing 1]
GO:0008307	structural constituent of muscle	0.000326	0.101	8.72	9811	5	900	4	[Mylpf - myosin light chain, phosphorylatable, fast skeletal muscle, Myl6 - myosin, light polypeptide 6, alkali, smooth muscle and non-muscle, Plec - plectin, Myl6b - myosin, light polypeptide 6b]
GO:0017048	Rho GTPase binding	0.000403	0.116	2.16	9811	111	900	22	[Eps8l2 - eps8-like 2, Plekhg3 - pleckstrin homology domain containing, family g (with rhogef domain) member 3, Arhgef10 - rho guanine nucleotide exchange factor (gef) 10, Plekhg2 - pleckstrin homology domain containing, family g (with rhogef domain) member 2, Dock2 - dedicator of cyto-kinesis 2, Dvl2 - dishevelled 2, dsh homolog (drosophila), Cyfip1 - cytoplasmic fmr1 interacting protein 1, Tiam…
GO:0005089	Rho guanyl-nucleotide exchange factor activity	0.000438	0.117	2.97	9811	44	900	12	[Eps8l2 - eps8-like 2, Arhgef9 - cdc42 guanine nucleotide exchange factor (gef) 9, Plekhg3 - pleckstrin homology domain containing, family g (with rhogef domain) member 3, Arhgef10 - rho guanine nucleotide exchange factor (gef) 10, Spata13 - spermatogenesis associated 13, Arhgef5 - rho guanine nucleotide exchange factor (gef) 5, Plekhg2 - pleckstrin homology domain containing, family g (with rhog…
GO:0060090	molecular adaptor activity	0.000563	0.14	2.2	9811	99	900	20	[Dab2ip - disabled 2 interacting protein, Lat - linker for activation of t cells, Grb7 - growth factor receptor bound protein 7, Anxa5 - annexin a5, Blnk - b cell linker, Optn - optineurin, Trim12c - tripartite motif-containing 12c, Cntln - centlein, centrosomal protein, Dvl2 - dishevelled 2, dsh homolog (drosophila), Tradd - tnfrsf1a-associated via death domain, Spsb4 - spla/ryanodine receptor d…
GO:0004861	cyclin-dependent protein serine/threonine kinase inhibitor activity	0.000591	0.138	6.06	9811	9	900	5	[Cdkn1b - cyclin-dependent kinase inhibitor 1b, Cdkn2c - cyclin-dependent kinase inhibitor 2c (p18, inhibits cdk4), Cdkn1c - cyclin-dependent kinase inhibitor 1c (p57), Hexim2 - hexamethylene bis-acetamide inducible 2, Cdkn2d - cyclin-dependent kinase inhibitor 2d (p19, inhibits cdk4)]
GO:0036312	phosphatidylinositol 3-kinase regulatory subunit binding	0.000591	0.13	6.06	9811	9	900	5	[Dab2ip - disabled 2 interacting protein, Pik3ap1 - phosphoinositide-3-kinase adaptor protein 1, Esr1 - estrogen receptor 1 (alpha), Dnm2 - dynamin 2, Nlrc3 - nlr family, card domain containing 3]
GO:0019901	protein kinase binding	0.000611	0.127	1.49	9811	484	900	66	[Grb7 - growth factor receptor bound protein 7, Lax1 - lymphocyte transmembrane adaptor 1, Prkd2 - protein kinase d2, Pitpnm1 - phosphatidylinositol transfer protein, membrane-associated 1, Atp2b4 - atpase, ca++ transporting, plasma membrane 4, Camk2b - calcium/calmodulin-dependent protein kinase ii, beta, Trib3 - tribbles homolog 3 (drosophila), Flna - filamin, alpha, Jup - junction plakoglobin,…
GO:0051015	actin filament binding	0.000663	0.13	2.23	9811	93	900	19	[Eps8l2 - eps8-like 2, Marcks - myristoylated alanine rich protein kinase c substrate, Mtss1 - metastasis suppressor 1, Actn4 - actinin alpha 4, Myo7a - myosin viia, Rcsd1 - rcsd domain containing 1, Utrn - utrophin, Pls3 - plastin 3 (t-isoform), Tpm1 - tropomyosin 1, alpha, Ssfa2 - sperm specific antigen 2, Syne2 - spectrin repeat containing, nuclear envelope 2, Flna - filamin, alpha, Capza1 - c…
GO:0030553	cGMP binding	0.00077	0.144	10.9	9811	3	900	3	[Pde2a - phosphodiesterase 2a, cgmp-stimulated, Pde5a - phosphodiesterase 5a, cgmp-specific, Cngb1 - cyclic nucleotide gated channel beta 1]
GO:0005096	GTPase activator activity	0.000825	0.147	1.87	9811	163	900	28	[Rasa3 - ras p21 protein activator 3, Als2cl - als2 c-terminal like, Gdi1 - guanosine diphosphate (gdp) dissociation inhibitor 1, Syde1 - synapse defective 1, rho gtpase, homolog 1 (c. elegans), Tbc1d10c - tbc1 domain family, member 10c, Arhgap25 - rho gtpase activating protein 25, Arhgap19 - rho gtpase activating protein 19, Jun - jun oncogene, Evi5l - ecotropic viral integration site 5 like, Ac…
GO:0005516	calmodulin binding	0.000896	0.152	2.23	9811	88	900	18	[Invs - inversin, Fas - fas (tnf receptor superfamily member 6), Iqcg - iq motif containing g, Pcnt - pericentrin (kendrin), Marcks - myristoylated alanine rich protein kinase c substrate, Cask - calcium/calmodulin-dependent serine protein kinase (maguk family), Myo7a - myosin viia, Myo1g - myosin ig, Myo1f - myosin if, Atp2b4 - atpase, ca++ transporting, plasma membrane 4, Camk2b - calcium/calmo…

## Sheet: Genes.Increased.Ab.P1P2dKO_cl_c
GeneName
Ccnd2
Mcts1
Tbrg4
Zfp385a
Wdr77
Hk2
Haao
Cd52
Nhp2
Ramp2
Rrp15
Slc19a1
Taco1
Angptl4
Cd320
Ipo4
Nr2f6
Slc9a3r2
Ggct
Jag2
Qtrt1
Tbc1d8
Fkbp11
Slc25a1
Kpna6
Fam162a
Gstm5
Angptl2
Phb2
Nkg7
Arid3b
Mtfp1
Sh2b2
Myl10
Celf1
Tfap4
Rsl1d1
Trap1
Atp5g1
Prss16
Tmbim1
Tmem147
Fbln1
Srm
Aprt
Slc5a6
Acot13
Mettl1
Rps18
Tnpo1
Ifrd2
Odc1
Thg1l
Rps5
Yes1
Nolc1
Endog
Cmah
Timp2
Ikzf3
Trove2
Akap1
C1qbp
Cenpv
Avpi1
Isyna1
Calr3
Socs2
H2afy2
Pno1
Pcsk4
Slc1a4
Ddc
Spata48
Lyrm7
Nsg2
Rack1
Nefh
Rps27a
Prpsap2
Bzw2
Dus4l
Bcap29
Adcy3
Ftsj3
Tcam1
Polg2
Cluh
Per1
Timm9
Slc25a29
Rpp40
Sema4d
Nsun2
Crhbp
Ercc8
Thrb
Spryd7
Mapk8
Pspc1
Eef1akmt1
Mipep
Tnfsf11
Slc39a14
Rida
Pop1
Myc
Syngr1
Ciita
Oplah
Lynx1
Ptk2
B3gnt5
Ccdc116
B4galt4
Pdia5
Dirc2
Brwd1
Sympk
Agap3
Tpi1
Rsph9
Ptk7
Guca1a
Ehd3
Rhoq
Nme4
Zfp523
Ccny
Hspa9
Lta
Mrps18b
Psmg2
Ppic
Rps14
Cd74
Fads3
Cd5
Tmem132a
Rcl1
Pcgf6
Gsto1
Pycr1
Got1
Twnk
Fam120c
Rps24
Shmt2
Ifitm1
Ifitm3
Tspan4
Gaa
Tma16
March8
Mcrip2
Nrp1
Pdgfa
Nop16
Lactb2
Tmem70
Fastkd2
Eef1b2
Hspd1
Wdr12
Nif3l1
Ppm1f
Pecr
Bard1
Ncl
Serpine2
Nifk
C4bp
Ppfia4
Opn3
Ralgps2
Smyd2
Iars2
Mettl13
Nek6
Pdss1
Coq4
St6galnac6
Gfi1b
Egfl7
Card9
Prg3
Timm10
Nop10
Nat10
Gatm
Mkks
Atrn
Rpusd2
Smox
Slc27a2
Polr1b
Dtd1
Fabp5
Car3
Nfs1
Ppid
Pfn2
Gar1
Lmna
Sema4a
Sh3d19
Bcar3
Asph
Ndufaf4
Coro2a
Epb41l4b
Tpm2
B4galt2
Mfsd2a
Ppt1
Ephb2
Mmachc
Mrto4
Eif3i
Sesn2
Padi2
Rpl22
Slc25a33
Atad3a
Fam213b
Htra3
Ociad2
Ppat
Glmn
Plac8
Rilpl1
Sdad1
Cct6a
Pus1
Rasal1
Asns
Frmd4b
Cd69
Ybx3
Tamm41
Tmem238
Gas2
Cd22
Zfp626
Aldoa
Lipt2
Ctbp2
Cttn
Tnni2
Itm2a
Dkc1
Eif4ebp1
Dctd
Heatr3
Gpt2
Crnde
Mt1
Rrad
Nip7
Taf1d
Tmem231
Arv1
Slc37a2
Lysmd2
Rsl24d1
Gorasp1
Abhd5
Bfsp2
Cish
Mst1r
Bsn
Chsy1
Lmo2
Sbspon
Pdxk
Camkv
Atp1a1
Mgll
Kbtbd12
Ttll4
Noc4l
Mif
Smyd5
Ppargc1b
Lgals3bp
Usp36
Chchd4
Batf
Fam151b
Ramp1
Cpne2
Gcsh
Ly6d
Nudt19
Dhcr24
Rrp12
Fam167a
Gnptab
Gm49322
Klf16
Grhpr
Wdr18
Apex1
Gm7008
Lmo1
Macrod1
H2-Aa
Plxnb2
Rps27l
Scd1
Lipt1
Matr3
Pomk
Hgsnat
Gemin5
Tmem97
Nenf
H2-DMb2
Nme1
Ankrd13b
6430571L13Rik
Rmi2
Arap2
Mrm3
Fam210a
Sema7a
Tsr1
Hdhd3
Sv2a
Rpf2
Tctn1
Angptl6
Phb
Rpl12
Rps21
Rsad1
Adk
Nrtn
Mrpl12
Mrps6
Lap3
Wdr34
Cercam
Trub2
Txlnb
Ccdc40
Dtx4
Slc7a5
Kyat3
Pitpnc1
Mybbp1a
Rundc3b
Pogk
Dok4
Lat2
Fbxw4
Cables1
Wdr43
Elovl6
Katnal1
Wapl
Utp4
Serpina3g
1810011H11Rik
Coq5
Utp15
Ydjc
Rpl37
Znrf3
Zfp239
Inpp5f
Abhd14a
Bag2
Specc1
Gnl3
Lgalsl
Tsen2
Dctpp1
Npl
Tmem108
Epop
Unc5cl
Tmem221
1700001O22Rik
Marveld1
Ly6k
2010007H06Rik
Tmem201
Serpinb1a
Ubtd2
Tst
Lrfn4
Ccdc73
Fahd1
6330549D23Rik
Plekha7
Zfp36l2
Polr2k
Eid2
Tmem229b
Plaur
Slc25a23
Jrk
Bdh1
Gm5424
Rpl14-ps1
Ppp1r3b
Fbl
Tefm
Fam185a
Ptgs1
Rps8
Samd9l
Timm8a1
Fbxo10
Lhfp
Gm12185
Sorl1
Rps23
Fzd9
Suox
Amz1
Bex1
Eif5a2
Prag1
Ndufaf6
B230217C12Rik
Kcnb1
Klhdc1
Rps10
Bhlha15
Hbb-bs
Smarca5-ps
9230110C19Rik
AI854703
Gas5
3110082I17Rik
Grwd1
Stum
Sirt5
Syne3
Taf4b
Tmem120b
Trim65
Tmem119
Miga1
Zfp647
St3gal5
Npm3
Pard6g
Adap1
Cd248
Them6
Tatdn2
Npm1
Rpl38
Fam136a
Pus7
Eif1a
Gm6807
Rpl32
Rpl36
Abce1
Rrp1b
Zfp420
Rpl5
Rpl30
Hspd1-ps3
Rpl11
Hopx
Rcan3
Zfp930
H2-Eb1
Rpl35a
Rpl26
Trmt61a
Myl4
Mmgt1
Rps7
Rps17
Zscan20
Rpl34
Rpp25
Rpl17
Gm15772
Rpl7a
Mtap
Rpl35
Ldha
Hacd1
Gm8995
Usp31
Rps15
Gm8730
Utp14a
Zfp979
Serpina3f
Lyar
Gm7666
S1pr3
Lpar5
Cst7
Rnase12
Pnp2
Gm10275
Hba-a1
Serpinh1
Npw
Rpl23
Psmg4
Eef1g
Mpst
Gm10355
Rpl37rt
Zfp951
Bhlhb9
Uprt
H2-Ab1
Arhgdig
Hspe1
Rpl31
4930520O04Rik
Kcng1
Zfas1
Ccdc58
Bex6
Ly6a
Ass1
Ighg2b
Tcrg-C1
Chml
Zfp984
Emc1
Cisd3
Tomm5
Dph1
Gm14410
Ak6
Fastkd5
Rpl36a
Rpl39
Gm15920
Rpl38-ps2
Gm13552
Gm13680
Gm14681
Rpl17-ps5
Rpl17-ps10
Pgam1-ps2
Snrpert
Gm15754
Gm11427
AA414768
Rpl21-ps15
Gm14586
Gm4459
Ldha-ps2
Rpl10a-ps1
Snhg15
Smc2os
Gm12679
Snhg12
Gm11579
2410006H16Rik
Gm11998
Epb41l4aos
2310075C17Rik
0610040B10Rik
Cdv3-ps
Smim13
Eid1
Gm10039
Phf11b
1110038B12Rik
Rpl41
Gm14328
Gm6472
3300005D01Rik
4930509E16Rik
Pvt1
Gm26781
1110019D14Rik
Snhg4
Gm27042
Gm28557
1810044D09Rik
Gm12669
Gm38345
Gstp-ps
Gm8069
Gm19708
Rpl36a-ps2
Gm43672
Tpi-rs11
Dancr
Gm9794
Gm4366
Gm45769
Gm35315
Gm7390
AC160637.1
Gm20234
Gm6477
Gm9118
Gm11361
Gm49327
Mrto4-ps1
Rpl17-ps3
Gm9616
Gm30108
Riok2

## Sheet: GO_IncreasedAbundance_dKO
GO_PROCESS
GO Term	Description	P-value	FDR q-value	Enrichment	N	B	n	b	Genes
GO:0044085	cellular component biogenesis	8.11e-18	1.05e-13	5.51	9812	123	521	36	[Rps24 - ribosomal protein s24, Rsl24d1 - ribosomal l24 domain containing 1, Utp15 - utp15, u3 small nucleolar ribonucleoprotein, homolog (yeast), Rps7 - ribosomal protein s7, Noc4l - nucleolar complex associated 4 homolog (s. cerevisiae), Rpl7a - ribosomal protein l7a, Serpine2 - serine (or cysteine) peptidase inhibitor, clade e, member 2, Nop10 - nop10 ribonucleoprotein, Polr1b - polymerase (rn…
GO:0022613	ribonucleoprotein complex biogenesis	3.58e-17	2.3e-13	5.62	9812	114	521	34	[Rps24 - ribosomal protein s24, Rsl24d1 - ribosomal l24 domain containing 1, Utp15 - utp15, u3 small nucleolar ribonucleoprotein, homolog (yeast), Rps7 - ribosomal protein s7, Noc4l - nucleolar complex associated 4 homolog (s. cerevisiae), Rpl7a - ribosomal protein l7a, Nop10 - nop10 ribonucleoprotein, Ipo4 - importin 4, Wdr12 - wd repeat domain 12, Gar1 - gar1 ribonucleoprotein homolog (yeast), …
GO:1901566	organonitrogen compound biosynthetic process	2.94e-15	1.26e-11	2.56	9812	581	521	79	[Mrps18b - mitochondrial ribosomal protein s18b, Uprt - uracil phosphoribosyltransferase (fur1) homolog (s. cerevisiae), Rsl24d1 - ribosomal l24 domain containing 1, Gatm - glycine amidinotransferase (l-arginine:glycine amidinotransferase), Rps27l - ribosomal protein s27-like, Iars2 - isoleucine-trna synthetase 2, mitochondrial, Eif5a2 - eukaryotic translation initiation factor 5a2, Dctd - dcmp d…
GO:0006412	translation	4.12e-13	1.33e-09	3.41	9812	243	521	44	[Mrps18b - mitochondrial ribosomal protein s18b, Rps24 - ribosomal protein s24, Rsl24d1 - ribosomal l24 domain containing 1, Rpl35 - ribosomal protein l35, Rps27a - ribosomal protein s27a, Rps21 - ribosomal protein s21, Rpl17 - ribosomal protein l17, Rps5 - ribosomal protein s5, Rps27l - ribosomal protein s27-like, Iars2 - isoleucine-trna synthetase 2, mitochondrial, Rps23 - ribosomal protein s23…
GO:0006364	rRNA processing	9.99e-13	2.57e-09	3.99	9812	165	521	35	[Rps24 - ribosomal protein s24, Rpl35 - ribosomal protein l35, Rps21 - ribosomal protein s21, Utp15 - utp15, u3 small nucleolar ribonucleoprotein, homolog (yeast), Rps7 - ribosomal protein s7, Rps8 - ribosomal protein s8, Rpl7a - ribosomal protein l7a, Nop10 - nop10 ribonucleoprotein, Wdr12 - wd repeat domain 12, Rcl1 - rna terminal phosphate cyclase-like 1, Rsl1d1 - ribosomal l1 domain containin…
GO:0016072	rRNA metabolic process	1.24e-12	2.66e-09	3.79	9812	184	521	37	[Rps24 - ribosomal protein s24, Rpl35 - ribosomal protein l35, Rps21 - ribosomal protein s21, Utp15 - utp15, u3 small nucleolar ribonucleoprotein, homolog (yeast), Rps7 - ribosomal protein s7, Rps8 - ribosomal protein s8, Rpl7a - ribosomal protein l7a, Nop10 - nop10 ribonucleoprotein, Polr1b - polymerase (rna) i polypeptide b, Wdr12 - wd repeat domain 12, Gar1 - gar1 ribonucleoprotein homolog (ye…
GO:0043043	peptide biosynthetic process	1.33e-12	2.44e-09	3.3	9812	251	521	44	[Mrps18b - mitochondrial ribosomal protein s18b, Rps24 - ribosomal protein s24, Rsl24d1 - ribosomal l24 domain containing 1, Rpl35 - ribosomal protein l35, Rps27a - ribosomal protein s27a, Rps21 - ribosomal protein s21, Rpl17 - ribosomal protein l17, Rps5 - ribosomal protein s5, Rps27l - ribosomal protein s27-like, Iars2 - isoleucine-trna synthetase 2, mitochondrial, Rps23 - ribosomal protein s23…
GO:0034470	ncRNA processing	5.66e-12	9.12e-09	2.98	9812	303	521	48	[Pus7 - pseudouridylate synthase 7 homolog (s. cerevisiae), Rps24 - ribosomal protein s24, Rpl35 - ribosomal protein l35, Pop1 - processing of precursor 1, ribonuclease p/mrp family, (s. cerevisiae), Rps21 - ribosomal protein s21, Trmt61a - trna methyltransferase 61a, Utp15 - utp15, u3 small nucleolar ribonucleoprotein, homolog (yeast), Rps7 - ribosomal protein s7, Rps8 - ribosomal protein s8, Rp…
GO:0043604	amide biosynthetic process	8.16e-12	1.17e-08	2.95	9812	306	521	48	[Mrps18b - mitochondrial ribosomal protein s18b, Rsl24d1 - ribosomal l24 domain containing 1, Rps24 - ribosomal protein s24, Rpl35 - ribosomal protein l35, Rps27a - ribosomal protein s27a, Rps21 - ribosomal protein s21, Rpl17 - ribosomal protein l17, Rps5 - ribosomal protein s5, Rps27l - ribosomal protein s27-like, Iars2 - isoleucine-trna synthetase 2, mitochondrial, Rps23 - ribosomal protein s23…
GO:0006518	peptide metabolic process	8.47e-12	1.09e-08	2.91	9812	317	521	49	[Mrps18b - mitochondrial ribosomal protein s18b, Rsl24d1 - ribosomal l24 domain containing 1, Rps27l - ribosomal protein s27-like, Iars2 - isoleucine-trna synthetase 2, mitochondrial, Eif5a2 - eukaryotic translation initiation factor 5a2, Rpl37 - ribosomal protein l37, Rpl41 - ribosomal protein l41, Rpl31 - ribosomal protein l31, Mmachc - methylmalonic aciduria cblc type, with homocystinuria, Gnb…
GO:0044249	cellular biosynthetic process	5.63e-11	6.6e-08	1.79	9812	1241	521	118	[Uprt - uracil phosphoribosyltransferase (fur1) homolog (s. cerevisiae), Rsl24d1 - ribosomal l24 domain containing 1, Gatm - glycine amidinotransferase (l-arginine:glycine amidinotransferase), Ptgs1 - prostaglandin-endoperoxide synthase 1, Abhd5 - abhydrolase domain containing 5, Iars2 - isoleucine-trna synthetase 2, mitochondrial, Eif5a2 - eukaryotic translation initiation factor 5a2, Grwd1 - gl…
GO:0042254	ribosome biogenesis	1.65e-10	1.77e-07	4.81	9812	90	521	23	[Rsl24d1 - ribosomal l24 domain containing 1, Dkc1 - dyskeratosis congenita 1, dyskerin, C1qbp - complement component 1, q subcomponent binding protein, Nip7 - nuclear import 7 homolog (s. cerevisiae), Sdad1 - sda1 domain containing 1, Riok2 - rio kinase 2 (yeast), Utp15 - utp15, u3 small nucleolar ribonucleoprotein, homolog (yeast), Noc4l - nucleolar complex associated 4 homolog (s. cerevisiae),…
GO:0034660	ncRNA metabolic process	1.82e-10	1.8e-07	2.58	9812	379	521	52	[Trmt61a - trna methyltransferase 61a, Iars2 - isoleucine-trna synthetase 2, mitochondrial, Gar1 - gar1 ribonucleoprotein homolog (yeast), Rsl1d1 - ribosomal l1 domain containing 1, Rcl1 - rna terminal phosphate cyclase-like 1, Trub2 - trub pseudouridine (psi) synthase homolog 2 (e. coli), Fbl - fibrillarin, Ftsj3 - ftsj homolog 3 (e. coli), Pus1 - pseudouridine synthase 1, Tsen2 - trna splicing …
GO:0009058	biosynthetic process	4.59e-10	4.22e-07	1.71	9812	1342	521	122	[Uprt - uracil phosphoribosyltransferase (fur1) homolog (s. cerevisiae), Rsl24d1 - ribosomal l24 domain containing 1, Gatm - glycine amidinotransferase (l-arginine:glycine amidinotransferase), Ptgs1 - prostaglandin-endoperoxide synthase 1, Abhd5 - abhydrolase domain containing 5, Iars2 - isoleucine-trna synthetase 2, mitochondrial, Eif5a2 - eukaryotic translation initiation factor 5a2, Grwd1 - gl…
GO:0044271	cellular nitrogen compound biosynthetic process	4.81e-10	4.13e-07	1.96	9812	825	521	86	[Mrps18b - mitochondrial ribosomal protein s18b, Slc25a33 - solute carrier family 25, member 33, Uprt - uracil phosphoribosyltransferase (fur1) homolog (s. cerevisiae), Rsl24d1 - ribosomal l24 domain containing 1, Lmo2 - lim domain only 2, Rps27l - ribosomal protein s27-like, Iars2 - isoleucine-trna synthetase 2, mitochondrial, Eif5a2 - eukaryotic translation initiation factor 5a2, Dctd - dcmp de…
GO:1901576	organic substance biosynthetic process	3.16e-09	2.54e-06	1.68	9812	1308	521	117	[Uprt - uracil phosphoribosyltransferase (fur1) homolog (s. cerevisiae), Rsl24d1 - ribosomal l24 domain containing 1, Gatm - glycine amidinotransferase (l-arginine:glycine amidinotransferase), Ptgs1 - prostaglandin-endoperoxide synthase 1, Abhd5 - abhydrolase domain containing 5, Iars2 - isoleucine-trna synthetase 2, mitochondrial, Eif5a2 - eukaryotic translation initiation factor 5a2, Grwd1 - gl…
GO:0043603	cellular amide metabolic process	4.57e-09	3.47e-06	2.32	9812	439	521	54	[Mrps18b - mitochondrial ribosomal protein s18b, Rsl24d1 - ribosomal l24 domain containing 1, Rps27l - ribosomal protein s27-like, Iars2 - isoleucine-trna synthetase 2, mitochondrial, Eif5a2 - eukaryotic translation initiation factor 5a2, Rpl37 - ribosomal protein l37, Rpl41 - ribosomal protein l41, Rpl31 - ribosomal protein l31, Mmachc - methylmalonic aciduria cblc type, with homocystinuria, Gnb…
GO:0046394	carboxylic acid biosynthetic process	4.87e-08	3.49e-05	3.33	9812	147	521	26	[Mgll - monoglyceride lipase, Scd1 - stearoyl-coenzyme a desaturase 1, Gatm - glycine amidinotransferase (l-arginine:glycine amidinotransferase), Ptgs1 - prostaglandin-endoperoxide synthase 1, Mif - macrophage migration inhibitory factor, Slc27a2 - solute carrier family 27 (fatty acid transporter), member 2, Fam213b - family with sequence similarity 213, member b, Cd74 - cd74 antigen (invariant p…
GO:0044283	small molecule biosynthetic process	5.04e-08	3.42e-05	2.56	9812	287	521	39	[Mgll - monoglyceride lipase, Uprt - uracil phosphoribosyltransferase (fur1) homolog (s. cerevisiae), Scd1 - stearoyl-coenzyme a desaturase 1, Isyna1 - myo-inositol 1-phosphate synthase a1, Ptgs1 - prostaglandin-endoperoxide synthase 1, Gatm - glycine amidinotransferase (l-arginine:glycine amidinotransferase), Pdss1 - prenyl (solanesyl) diphosphate synthase, subunit 1, Fam213b - family with seque…
GO:0016053	organic acid biosynthetic process	5.63e-08	3.62e-05	3.31	9812	148	521	26	[Mgll - monoglyceride lipase, Scd1 - stearoyl-coenzyme a desaturase 1, Ptgs1 - prostaglandin-endoperoxide synthase 1, Gatm - glycine amidinotransferase (l-arginine:glycine amidinotransferase), Mif - macrophage migration inhibitory factor, Slc27a2 - solute carrier family 27 (fatty acid transporter), member 2, Fam213b - family with sequence similarity 213, member b, Cd74 - cd74 antigen (invariant p…
GO:0002181	cytoplasmic translation	1.23e-07	7.55e-05	7.14	9812	29	521	11	[Rpl36 - ribosomal protein l36, Rps21 - ribosomal protein s21, Rpl17 - ribosomal protein l17, Rpl35a - ribosomal protein l35a, Rpl11 - ribosomal protein l11, Rpl30 - ribosomal protein l30, Rpl31 - ribosomal protein l31, Rpl39 - ribosomal protein l39, Rps23 - ribosomal protein s23, Rpl26 - ribosomal protein l26, Rpl38 - ribosomal protein l38]
GO:0042273	ribosomal large subunit biogenesis	6.08e-07	0.000356	6.98	9812	27	521	10	[Nop16 - nop16 nucleolar protein, Nip7 - nuclear import 7 homolog (s. cerevisiae), Sdad1 - sda1 domain containing 1, Rpf2 - ribosome production factor 2 homolog (s. cerevisiae), Rpl35a - ribosomal protein l35a, Rpl11 - ribosomal protein l11, Heatr3 - heat repeat containing 3, Rpl5 - ribosomal protein l5, Rpl26 - ribosomal protein l26, Npm1 - nucleophosmin 1]
GO:0001522	pseudouridine synthesis	9.52e-07	0.000533	8.86	9812	17	521	8	[Nop10 - nop10 ribonucleoprotein, Pus7 - pseudouridylate synthase 7 homolog (s. cerevisiae), Dkc1 - dyskeratosis congenita 1, dyskerin, Gar1 - gar1 ribonucleoprotein homolog (yeast), Rpusd2 - rna pseudouridylate synthase domain containing 2, Trub2 - trub pseudouridine (psi) synthase homolog 2 (e. coli), Pus1 - pseudouridine synthase 1, Nhp2 - nhp2 ribonucleoprotein]
GO:0034645	cellular macromolecule biosynthetic process	2.33e-06	0.00125	1.81	9812	655	521	63	[Mrps18b - mitochondrial ribosomal protein s18b, Slc25a33 - solute carrier family 25, member 33, Rsl24d1 - ribosomal l24 domain containing 1, Lmo2 - lim domain only 2, Rps27l - ribosomal protein s27-like, Iars2 - isoleucine-trna synthetase 2, mitochondrial, Eif5a2 - eukaryotic translation initiation factor 5a2, Rmi2 - rmi2, recq mediated genome instability 2, homolog (s. cerevisiae), Rpl37 - ribo…
GO:0072330	monocarboxylic acid biosynthetic process	1.31e-05	0.00675	3.42	9812	88	521	16	[Mgll - monoglyceride lipase, Scd1 - stearoyl-coenzyme a desaturase 1, Ptgs1 - prostaglandin-endoperoxide synthase 1, Tpi1 - triosephosphate isomerase 1, Aldoa - aldolase a, fructose-bisphosphate, Slc27a2 - solute carrier family 27 (fatty acid transporter), member 2, Mif - macrophage migration inhibitory factor, Fam213b - family with sequence similarity 213, member b, Ldha - lactate dehydrogenase…
GO:1904667	negative regulation of ubiquitin protein ligase activity	2.03e-05	0.0101	11.77	9812	8	521	5	[Rpl23 - ribosomal protein l23, Rpl11 - ribosomal protein l11, Rpl5 - ribosomal protein l5, Rps7 - ribosomal protein s7, Bag2 - bcl2-associated athanogene 2]
GO:0000470	maturation of LSU-rRNA	2.18e-05	0.0104	7.32	9812	18	521	7	[Rpl35 - ribosomal protein l35, Wdr12 - wd repeat domain 12, Rsl1d1 - ribosomal l1 domain containing 1, Rpf2 - ribosome production factor 2 homolog (s. cerevisiae), Ftsj3 - ftsj homolog 3 (e. coli), Nhp2 - nhp2 ribonucleoprotein, Rpl7a - ribosomal protein l7a]
GO:0031118	rRNA pseudouridine synthesis	3.77e-05	0.0173	15.07	9812	5	521	4	[Nop10 - nop10 ribonucleoprotein, Dkc1 - dyskeratosis congenita 1, dyskerin, Gar1 - gar1 ribonucleoprotein homolog (yeast), Nhp2 - nhp2 ribonucleoprotein]
GO:0009059	macromolecule biosynthetic process	3.87e-05	0.0172	1.65	9812	730	521	64	[Mrps18b - mitochondrial ribosomal protein s18b, Slc25a33 - solute carrier family 25, member 33, Rsl24d1 - ribosomal l24 domain containing 1, Lmo2 - lim domain only 2, Rps27l - ribosomal protein s27-like, Iars2 - isoleucine-trna synthetase 2, mitochondrial, Eif5a2 - eukaryotic translation initiation factor 5a2, Rmi2 - rmi2, recq mediated genome instability 2, homolog (s. cerevisiae), Rpl37 - ribo…
GO:0042274	ribosomal small subunit biogenesis	4.54e-05	0.0195	8.07	9812	14	521	6	[Rps24 - ribosomal protein s24, Riok2 - rio kinase 2 (yeast), Rps15 - ribosomal protein s15, Rps7 - ribosomal protein s7, Npm1 - nucleophosmin 1, Rps17 - ribosomal protein s17]
GO:0000027	ribosomal large subunit assembly	5.42e-05	0.0225	5.58	9812	27	521	8	[Rsl24d1 - ribosomal l24 domain containing 1, Wdr18 - wd repeat domain 18, Rpf2 - ribosome production factor 2 homolog (s. cerevisiae), Rpl11 - ribosomal protein l11, Rpl12 - ribosomal protein l12, Rpl5 - ribosomal protein l5, Mrto4 - mrt4, mrna turnover 4, homolog (s. cerevisiae), Fastkd2 - fast kinase domains 2]
GO:0002504	antigen processing and presentation of peptide or polysaccharide antigen via MHC class II	7.22e-05	0.0291	7.53	9812	15	521	6	[Cd74 - cd74 antigen (invariant polypeptide of major histocompatibility complex, class ii antigen-associated), H2-Ab1 - histocompatibility 2, class ii antigen a, beta 1, H2-Aa - histocompatibility 2, class ii antigen a, alpha, March8 - membrane-associated ring finger (c3hc4) 8, H2-DMb2 - histocompatibility 2, class ii, locus mb2, H2-Eb1 - histocompatibility 2, class ii antigen e beta]
GO:0002495	antigen processing and presentation of peptide antigen via MHC class II	7.22e-05	0.0282	7.53	9812	15	521	6	[Cd74 - cd74 antigen (invariant polypeptide of major histocompatibility complex, class ii antigen-associated), H2-Ab1 - histocompatibility 2, class ii antigen a, beta 1, H2-Aa - histocompatibility 2, class ii antigen a, alpha, March8 - membrane-associated ring finger (c3hc4) 8, H2-DMb2 - histocompatibility 2, class ii, locus mb2, H2-Eb1 - histocompatibility 2, class ii antigen e beta]
GO:0006636	unsaturated fatty acid biosynthetic process	8.35e-05	0.0317	9.42	9812	10	521	5	[Cd74 - cd74 antigen (invariant polypeptide of major histocompatibility complex, class ii antigen-associated), Scd1 - stearoyl-coenzyme a desaturase 1, Ptgs1 - prostaglandin-endoperoxide synthase 1, Mif - macrophage migration inhibitory factor, Fam213b - family with sequence similarity 213, member b]
GO:0001516	prostaglandin biosynthetic process	0.000108	0.0398	12.56	9812	6	521	4	[Cd74 - cd74 antigen (invariant polypeptide of major histocompatibility complex, class ii antigen-associated), Ptgs1 - prostaglandin-endoperoxide synthase 1, Mif - macrophage migration inhibitory factor, Fam213b - family with sequence similarity 213, member b]
GO:0046457	prostanoid biosynthetic process	0.000108	0.0387	12.56	9812	6	521	4	[Cd74 - cd74 antigen (invariant polypeptide of major histocompatibility complex, class ii antigen-associated), Ptgs1 - prostaglandin-endoperoxide synthase 1, Fam213b - family with sequence similarity 213, member b, Mif - macrophage migration inhibitory factor]
GO:0050922	negative regulation of chemotaxis	0.00011	0.0384	7.06	9812	16	521	6	[Sema4a - sema domain, immunoglobulin domain (ig), transmembrane domain (tm) and short cytoplasmic domain, (semaphorin) 4a, Padi2 - peptidyl arginine deiminase, type ii, Sema4d - sema domain, immunoglobulin domain (ig), transmembrane domain (tm) and short cytoplasmic domain, (semaphorin) 4d, Nrp1 - neuropilin 1, Sema7a - sema domain, immunoglobulin domain (ig), and gpi membrane anchor, (semaphori…
GO:0034641	cellular nitrogen compound metabolic process	0.000113	0.0382	1.31	9812	2124	521	148	[Uprt - uracil phosphoribosyltransferase (fur1) homolog (s. cerevisiae), Rsl24d1 - ribosomal l24 domain containing 1, Iars2 - isoleucine-trna synthetase 2, mitochondrial, Eif5a2 - eukaryotic translation initiation factor 5a2, Hspd1 - heat shock protein 1 (chaperonin), Grwd1 - glutamate-rich wd repeat containing 1, Aprt - adenine phosphoribosyl transferase, Rsl1d1 - ribosomal l1 domain containing …
GO:1901796	regulation of signal transduction by p53 class mediator	0.000121	0.0399	3.77	9812	55	521	11	[Cd74 - cd74 antigen (invariant polypeptide of major histocompatibility complex, class ii antigen-associated), Rpl23 - ribosomal protein l23, Zfp385a - zinc finger protein 385a, Smyd2 - set and mynd domain containing 2, Rpf2 - ribosome production factor 2 homolog (s. cerevisiae), Rpl11 - ribosomal protein l11, Rpl5 - ribosomal protein l5, Rps7 - ribosomal protein s7, Rpl26 - ribosomal protein l26…
GO:0000154	rRNA modification	0.000133	0.0428	5.73	9812	23	521	7	[Nop10 - nop10 ribonucleoprotein, Dkc1 - dyskeratosis congenita 1, dyskerin, Gar1 - gar1 ribonucleoprotein homolog (yeast), Fbl - fibrillarin, Ftsj3 - ftsj homolog 3 (e. coli), Nhp2 - nhp2 ribonucleoprotein, Nat10 - n-acetyltransferase 10]
GO:0031120	snRNA pseudouridine synthesis	0.000149	0.0468	18.83	9812	3	521	3	[Nop10 - nop10 ribonucleoprotein, Dkc1 - dyskeratosis congenita 1, dyskerin, Nhp2 - nhp2 ribonucleoprotein]
GO:0006633	fatty acid biosynthetic process	0.000172	0.0527	3.92	9812	48	521	10	[Cd74 - cd74 antigen (invariant polypeptide of major histocompatibility complex, class ii antigen-associated), Mgll - monoglyceride lipase, Scd1 - stearoyl-coenzyme a desaturase 1, Fads3 - fatty acid desaturase 3, Ptgs1 - prostaglandin-endoperoxide synthase 1, Ptpla - protein tyrosine phosphatase-like (proline instead of catalytic arginine), member a, Pecr - peroxisomal trans-2-enoyl-coa reductas…
GO:0006396	RNA processing	0.000217	0.065	1.63	9812	623	521	54	[Trmt61a - trna methyltransferase 61a, Rsl1d1 - ribosomal l1 domain containing 1, Rcl1 - rna terminal phosphate cyclase-like 1, Gar1 - gar1 ribonucleoprotein homolog (yeast), Fastkd5 - fast kinase domains 5, Trub2 - trub pseudouridine (psi) synthase homolog 2 (e. coli), Fbl - fibrillarin, Ftsj3 - ftsj homolog 3 (e. coli), Pus1 - pseudouridine synthase 1, Tsen2 - trna splicing endonuclease 2 homol…
GO:2000232	regulation of rRNA processing	0.00024	0.0703	7.85	9812	12	521	5	[Ncl - nucleolin, Utp15 - utp15, u3 small nucleolar ribonucleoprotein, homolog (yeast), Riok2 - rio kinase 2 (yeast), Wdr43 - wd repeat domain 43, Usp36 - ubiquitin specific peptidase 36]
GO:0000028	ribosomal small subunit assembly	0.00024	0.0688	7.85	9812	12	521	5	[Rps5 - ribosomal protein s5, Rps15 - ribosomal protein s15, Rps27l - ribosomal protein s27-like, Rps14 - ribosomal protein s14, Rps10 - ribosomal protein s10]
GO:1902668	negative regulation of axon guidance	0.000242	0.0678	10.76	9812	7	521	4	[Sema4a - sema domain, immunoglobulin domain (ig), transmembrane domain (tm) and short cytoplasmic domain, (semaphorin) 4a, Sema4d - sema domain, immunoglobulin domain (ig), transmembrane domain (tm) and short cytoplasmic domain, (semaphorin) 4d, Nrp1 - neuropilin 1, Sema7a - sema domain, immunoglobulin domain (ig), and gpi membrane anchor, (semaphorin) 7a]
GO:0048843	negative regulation of axon extension involved in axon guidance	0.000242	0.0663	10.76	9812	7	521	4	[Sema4a - sema domain, immunoglobulin domain (ig), transmembrane domain (tm) and short cytoplasmic domain, (semaphorin) 4a, Sema4d - sema domain, immunoglobulin domain (ig), transmembrane domain (tm) and short cytoplasmic domain, (semaphorin) 4d, Nrp1 - neuropilin 1, Sema7a - sema domain, immunoglobulin domain (ig), and gpi membrane anchor, (semaphorin) 7a]
GO:0022618	ribonucleoprotein complex assembly	0.000276	0.0741	2.31	9812	171	521	21	[Taf9 - taf9 rna polymerase ii, tata box binding protein (tbp)-associated factor, Rsl24d1 - ribosomal l24 domain containing 1, Wdr18 - wd repeat domain 18, C1qbp - complement component 1, q subcomponent binding protein, Nip7 - nuclear import 7 homolog (s. cerevisiae), Gemin5 - gem (nuclear organelle) associated protein 5, Rps5 - ribosomal protein s5, Rpl11 - ribosomal protein l11, Rps27l - riboso…
GO:0048841	regulation of axon extension involved in axon guidance	0.000463	0.122	9.42	9812	8	521	4	[Sema4a - sema domain, immunoglobulin domain (ig), transmembrane domain (tm) and short cytoplasmic domain, (semaphorin) 4a, Sema4d - sema domain, immunoglobulin domain (ig), transmembrane domain (tm) and short cytoplasmic domain, (semaphorin) 4d, Nrp1 - neuropilin 1, Sema7a - sema domain, immunoglobulin domain (ig), and gpi membrane anchor, (semaphorin) 7a]
GO:0009451	RNA modification	0.000482	0.124	2.55	9812	118	521	16	[Pus7 - pseudouridylate synthase 7 homolog (s. cerevisiae), Nsun2 - nol1/nop2/sun domain family member 2, Dkc1 - dyskeratosis congenita 1, dyskerin, Thg1l - trna-histidine guanylyltransferase 1-like (s. cerevisiae), Trmt61a - trna methyltransferase 61a, Nop10 - nop10 ribonucleoprotein, Qtrt1 - queuine trna-ribosyltransferase 1, Gar1 - gar1 ribonucleoprotein homolog (yeast), Rpusd2 - rna pseudouri…
GO:0071526	semaphorin-plexin signaling pathway	0.000555	0.14	6.73	9812	14	521	5	[Sema4a - sema domain, immunoglobulin domain (ig), transmembrane domain (tm) and short cytoplasmic domain, (semaphorin) 4a, Plxnb2 - plexin b2, Sema4d - sema domain, immunoglobulin domain (ig), transmembrane domain (tm) and short cytoplasmic domain, (semaphorin) 4d, Nrp1 - neuropilin 1, Sema7a - sema domain, immunoglobulin domain (ig), and gpi membrane anchor, (semaphorin) 7a]
GO:0001755	neural crest cell migration	0.000555	0.138	6.73	9812	14	521	5	[Sema4a - sema domain, immunoglobulin domain (ig), transmembrane domain (tm) and short cytoplasmic domain, (semaphorin) 4a, Sema4d - sema domain, immunoglobulin domain (ig), transmembrane domain (tm) and short cytoplasmic domain, (semaphorin) 4d, Nrtn - neurturin, Nrp1 - neuropilin 1, Sema7a - sema domain, immunoglobulin domain (ig), and gpi membrane anchor, (semaphorin) 7a]
GO:1904666	regulation of ubiquitin protein ligase activity	0.000555	0.135	6.73	9812	14	521	5	[Rpl23 - ribosomal protein l23, Rpl11 - ribosomal protein l11, Rpl5 - ribosomal protein l5, Rps7 - ribosomal protein s7, Bag2 - bcl2-associated athanogene 2]
GO:0090069	regulation of ribosome biogenesis	0.000555	0.133	6.73	9812	14	521	5	[Ncl - nucleolin, Utp15 - utp15, u3 small nucleolar ribonucleoprotein, homolog (yeast), Riok2 - rio kinase 2 (yeast), Wdr43 - wd repeat domain 43, Usp36 - ubiquitin specific peptidase 36]
GO:0046456	icosanoid biosynthetic process	0.000555	0.13	6.73	9812	14	521	5	[Cd74 - cd74 antigen (invariant polypeptide of major histocompatibility complex, class ii antigen-associated), Ptgs1 - prostaglandin-endoperoxide synthase 1, Prg3 - proteoglycan 3, Fam213b - family with sequence similarity 213, member b, Mif - macrophage migration inhibitory factor]
GO:0019886	antigen processing and presentation of exogenous peptide antigen via MHC class II	0.000555	0.128	6.73	9812	14	521	5	[Cd74 - cd74 antigen (invariant polypeptide of major histocompatibility complex, class ii antigen-associated), H2-Ab1 - histocompatibility 2, class ii antigen a, beta 1, H2-Aa - histocompatibility 2, class ii antigen a, alpha, H2-DMb2 - histocompatibility 2, class ii, locus mb2, H2-Eb1 - histocompatibility 2, class ii antigen e beta]
GO:0000454	snoRNA guided rRNA pseudouridine synthesis	0.000572	0.129	14.12	9812	4	521	3	[Nop10 - nop10 ribonucleoprotein, Dkc1 - dyskeratosis congenita 1, dyskerin, Gar1 - gar1 ribonucleoprotein homolog (yeast)]
GO:0006166	purine ribonucleoside salvage	0.000572	0.127	14.12	9812	4	521	3	[Aprt - adenine phosphoribosyl transferase, Mtap - methylthioadenosine phosphorylase, Adk - adenosine kinase]
GO:0033559	unsaturated fatty acid metabolic process	0.000596	0.13	5.38	9812	21	521	6	[Cd74 - cd74 antigen (invariant polypeptide of major histocompatibility complex, class ii antigen-associated), Mgll - monoglyceride lipase, Scd1 - stearoyl-coenzyme a desaturase 1, Ptgs1 - prostaglandin-endoperoxide synthase 1, Mif - macrophage migration inhibitory factor, Fam213b - family with sequence similarity 213, member b]
GO:0071826	ribonucleoprotein complex subunit organization	0.000691	0.148	2.16	9812	183	521	21	[Taf9 - taf9 rna polymerase ii, tata box binding protein (tbp)-associated factor, Rsl24d1 - ribosomal l24 domain containing 1, Wdr18 - wd repeat domain 18, C1qbp - complement component 1, q subcomponent binding protein, Nip7 - nuclear import 7 homolog (s. cerevisiae), Gemin5 - gem (nuclear organelle) associated protein 5, Rps5 - ribosomal protein s5, Rpl11 - ribosomal protein l11, Rps27l - riboso…
GO:0042455	ribonucleoside biosynthetic process	0.000783	0.165	5.14	9812	22	521	6	[Uprt - uracil phosphoribosyltransferase (fur1) homolog (s. cerevisiae), Aprt - adenine phosphoribosyl transferase, Mtap - methylthioadenosine phosphorylase, Nme1 - nme/nm23 nucleoside diphosphate kinase 1, Adk - adenosine kinase, Nme4 - nme/nm23 nucleoside diphosphate kinase 4]
GO:0009163	nucleoside biosynthetic process	0.000783	0.163	5.14	9812	22	521	6	[Uprt - uracil phosphoribosyltransferase (fur1) homolog (s. cerevisiae), Aprt - adenine phosphoribosyl transferase, Mtap - methylthioadenosine phosphorylase, Nme1 - nme/nm23 nucleoside diphosphate kinase 1, Adk - adenosine kinase, Nme4 - nme/nm23 nucleoside diphosphate kinase 4]
GO:0042451	purine nucleoside biosynthetic process	0.000797	0.163	6.28	9812	15	521	5	[Aprt - adenine phosphoribosyl transferase, Mtap - methylthioadenosine phosphorylase, Nme1 - nme/nm23 nucleoside diphosphate kinase 1, Adk - adenosine kinase, Nme4 - nme/nm23 nucleoside diphosphate kinase 4]
GO:0046129	purine ribonucleoside biosynthetic process	0.000797	0.16	6.28	9812	15	521	5	[Aprt - adenine phosphoribosyl transferase, Mtap - methylthioadenosine phosphorylase, Nme1 - nme/nm23 nucleoside diphosphate kinase 1, Adk - adenosine kinase, Nme4 - nme/nm23 nucleoside diphosphate kinase 4]
GO:0008652	cellular amino acid biosynthetic process	0.000855	0.169	3.86	9812	39	521	8	[Got1 - glutamate oxaloacetate transaminase 1, soluble, Mtap - methylthioadenosine phosphorylase, Gatm - glycine amidinotransferase (l-arginine:glycine amidinotransferase), Shmt2 - serine hydroxymethyltransferase 2 (mitochondrial), Pycr1 - pyrroline-5-carboxylate reductase 1, Gm5424 - argininosuccinate synthase pseudogene, Ass1 - argininosuccinate synthetase 1, Asns - asparagine synthetase]
GO:1901607	alpha-amino acid biosynthetic process	0.000855	0.167	3.86	9812	39	521	8	[Got1 - glutamate oxaloacetate transaminase 1, soluble, Mtap - methylthioadenosine phosphorylase, Gatm - glycine amidinotransferase (l-arginine:glycine amidinotransferase), Shmt2 - serine hydroxymethyltransferase 2 (mitochondrial), Pycr1 - pyrroline-5-carboxylate reductase 1, Gm5424 - argininosuccinate synthase pseudogene, Ass1 - argininosuccinate synthetase 1, Asns - asparagine synthetase]
GO:0009611	response to wounding	0.00094	0.181	3	9812	69	521	11	[Zfp36l2 - zinc finger protein 36, c3h type-like 2, Serpine2 - serine (or cysteine) peptidase inhibitor, clade e, member 2, Epb4.1l4b - erythrocyte protein band 4.1-like 4b, 2310075C17Rik - riken cdna 2310075c17 gene, Pvt1 - plasmacytoma variant translocation 1, Nefh - neurofilament, heavy polypeptide, Pdgfa - platelet derived growth factor, alpha, Dancr - differentiation antagonizing non-protein…
GO:0043436	oxoacid metabolic process	0.00097	0.184	1.67	9812	452	521	40	[Mgll - monoglyceride lipase, Suox - sulfite oxidase, Scd1 - stearoyl-coenzyme a desaturase 1, Gatm - glycine amidinotransferase (l-arginine:glycine amidinotransferase), Ptgs1 - prostaglandin-endoperoxide synthase 1, Abhd5 - abhydrolase domain containing 5, Iars2 - isoleucine-trna synthetase 2, mitochondrial, Slc27a2 - solute carrier family 27 (fatty acid transporter), member 2, Mif - macrophage …
GO_FUNCTION
GO Term	Description	P-value	FDR q-value	Enrichment	N	B	n	b	Genes
GO:0003735	structural constituent of ribosome	1.06e-15	3.94e-12	5.08	9812	126	521	34	[Mrps18b - mitochondrial ribosomal protein s18b, Rps24 - ribosomal protein s24, Rsl24d1 - ribosomal l24 domain containing 1, Rpl35 - ribosomal protein l35, Rps27a - ribosomal protein s27a, Rps21 - ribosomal protein s21, Rps5 - ribosomal protein s5, Rpl17 - ribosomal protein l17, Rps27l - ribosomal protein s27-like, Rps23 - ribosomal protein s23, Rps7 - ribosomal protein s7, Rps8 - ribosomal prote…
GO:0005198	structural molecule activity	8.18e-10	1.53e-06	2.73	9812	303	521	44	[Ctbp2 - c-terminal binding protein 2, Mrps18b - mitochondrial ribosomal protein s18b, Marveld1 - marvel (membrane-associating) domain containing 1, Rsl24d1 - ribosomal l24 domain containing 1, Rps24 - ribosomal protein s24, Rpl35 - ribosomal protein l35, Slc9a3r2 - solute carrier family 9 (sodium/hydrogen exchanger), member 3 regulator 2, Rps27a - ribosomal protein s27a, Rps21 - ribosomal protei…
GO:0019843	rRNA binding	1.45e-07	0.00018	4.71	9812	64	521	16	[Rpl23 - ribosomal protein l23, Ncl - nucleolin, Rpl17 - ribosomal protein l17, Rps5 - ribosomal protein s5, Rpl11 - ribosomal protein l11, Tst - thiosulfate sulfurtransferase, mitochondrial, Rpl37 - ribosomal protein l37, Mrps6 - mitochondrial ribosomal protein s6, Rpf2 - ribosome production factor 2 homolog (s. cerevisiae), Rpl12 - ribosomal protein l12, Fastkd5 - fast kinase domains 5, Rpl5 - …
GO:0055105	ubiquitin-protein transferase inhibitor activity	2.38e-06	0.00222	15.69	9812	6	521	5	[Rpl23 - ribosomal protein l23, Glmn - glomulin, fkbp associated protein, Rpl11 - ribosomal protein l11, Rpl5 - ribosomal protein l5, Rps7 - ribosomal protein s7]
GO:0034513	box H/ACA snoRNA binding	7.86e-06	0.00588	18.83	9812	4	521	4	[Nop10 - nop10 ribonucleoprotein, Dkc1 - dyskeratosis congenita 1, dyskerin, Gar1 - gar1 ribonucleoprotein homolog (yeast), Nhp2 - nhp2 ribonucleoprotein]
GO:1990948	ubiquitin ligase inhibitor activity	3.77e-05	0.0235	15.07	9812	5	521	4	[Rpl23 - ribosomal protein l23, Rpl11 - ribosomal protein l11, Rpl5 - ribosomal protein l5, Rps7 - ribosomal protein s7]
GO:0048027	mRNA 5'-UTR binding	4.83e-05	0.0258	6.59	9812	20	521	7	[Ncl - nucleolin, Rsl1d1 - ribosomal l1 domain containing 1, Rps14 - ribosomal protein s14, Rpl5 - ribosomal protein l5, Rps7 - ribosomal protein s7, Rpl26 - ribosomal protein l26, Gnl3 - guanine nucleotide binding protein-like 3 (nucleolar)]
GO:0003723	RNA binding	0.000162	0.0757	1.54	9812	843	521	69	[Rsl24d1 - ribosomal l24 domain containing 1, Iars2 - isoleucine-trna synthetase 2, mitochondrial, Jrk - jerky, Eif5a2 - eukaryotic translation initiation factor 5a2, Hspd1 - heat shock protein 1 (chaperonin), Rpl37 - ribosomal protein l37, Mki67ip - mki67 (fha domain) interacting nucleolar phosphoprotein, Bard1 - brca1 associated ring domain 1, Rsl1d1 - ribosomal l1 domain containing 1, Gar1 - g…
GO:0009982	pseudouridine synthase activity	0.000373	0.155	7.24	9812	13	521	5	[Pus7 - pseudouridylate synthase 7 homolog (s. cerevisiae), Dkc1 - dyskeratosis congenita 1, dyskerin, Rpusd2 - rna pseudouridylate synthase domain containing 2, Trub2 - trub pseudouridine (psi) synthase homolog 2 (e. coli), Pus1 - pseudouridine synthase 1]
GO:0051082	unfolded protein binding	0.000539	0.202	3.01	9812	75	521	12	[Hspd1 - heat shock protein 1 (chaperonin), Cct6a - chaperonin containing tcp1, subunit 6a (zeta), Mkks - mckusick-kaufman syndrome, Serpinh1 - serine (or cysteine) peptidase inhibitor, clade h, member 1, Heatr3 - heat repeat containing 3, Ppid - peptidylprolyl isomerase d (cyclophilin d), Hspa9 - heat shock protein 9, Calr3 - calreticulin 3, Hspe1 - heat shock protein 1 (chaperonin 10), Npm1 - n…
GO:0055106	ubiquitin-protein transferase regulator activity	0.000797	0.271	6.28	9812	15	521	5	[Rpl23 - ribosomal protein l23, Glmn - glomulin, fkbp associated protein, Rpl11 - ribosomal protein l11, Rpl5 - ribosomal protein l5, Rps7 - ribosomal protein s7]
GO:0015026	coreceptor activity	0.000799	0.249	8.37	9812	9	521	4	[Ramp2 - receptor (calcitonin) activity modifying protein 2, Cd22 - cd22 antigen, Ramp1 - receptor (calcitonin) activity modifying protein 1, Ptk7 - ptk7 protein tyrosine kinase 7]
GO:0048018	receptor ligand activity	0.00094	0.27	3	9812	69	521	11	[Sema4a - sema domain, immunoglobulin domain (ig), transmembrane domain (tm) and short cytoplasmic domain, (semaphorin) 4a, Lta - lymphotoxin a, Sema4d - sema domain, immunoglobulin domain (ig), transmembrane domain (tm) and short cytoplasmic domain, (semaphorin) 4d, Cd320 - cd320 antigen, Nrtn - neurturin, Jag2 - jagged 2, Sema7a - sema domain, immunoglobulin domain (ig), and gpi membrane anchor…
GO:0042277	peptide binding	0.000973	0.26	2.26	9812	150	521	18	[Ephb2 - eph receptor b2, Ramp2 - receptor (calcitonin) activity modifying protein 2, H2-Ab1 - histocompatibility 2, class ii antigen a, beta 1, Crhbp - corticotropin releasing hormone binding protein, H2-Aa - histocompatibility 2, class ii antigen a, alpha, Sorl1 - sortilin-related receptor, ldlr class a repeats-containing, Ppid - peptidylprolyl isomerase d (cyclophilin d), Ramp1 - receptor (cal…

## Sheet: Genes.AS.dKO_cl_i_ii
Gene stable ID	Gene name
ENSMUSG00000000085	Scmh1
ENSMUSG00000000244	Tspan32
ENSMUSG00000000325	Arvcf
ENSMUSG00000000326	Comt
ENSMUSG00000000441	Raf1
ENSMUSG00000000600	Krit1
ENSMUSG00000000782	Tcf7
ENSMUSG00000000827	Tpd52l2
ENSMUSG00000000838	Fmr1
ENSMUSG00000000902	Smarcb1
ENSMUSG00000000958	Slc7a7
ENSMUSG00000001017	Chtop
ENSMUSG00000001052	Sec24b
ENSMUSG00000001105	Ift20
ENSMUSG00000001138	Cnnm3
ENSMUSG00000001240	Ramp2
ENSMUSG00000001323	Srr
ENSMUSG00000001518	Itfg2
ENSMUSG00000001909	Trmt1
ENSMUSG00000001911	Nfix
ENSMUSG00000002010	Idh3g
ENSMUSG00000002107	Celf2
ENSMUSG00000002109	Ddb2
ENSMUSG00000002221	Paxip1
ENSMUSG00000002279	Lmf1
ENSMUSG00000002413	Braf
ENSMUSG00000002496	Tsc2
ENSMUSG00000002524	Puf60
ENSMUSG00000002546	Golga2
ENSMUSG00000002885	Adgre5
ENSMUSG00000003038	Hmgn2
ENSMUSG00000003198	Zfp959
ENSMUSG00000003269	Cyth2
ENSMUSG00000003680	Taf6l
ENSMUSG00000003778	Brd8
ENSMUSG00000004207	Psap
ENSMUSG00000004233	Wars2
ENSMUSG00000004319	Clcn3
ENSMUSG00000004565	Pnpla6
ENSMUSG00000004591	Pkn2
ENSMUSG00000004609	Cd33
ENSMUSG00000004698	Hdac9
ENSMUSG00000004947	Dtx2
ENSMUSG00000004980	Hnrnpa2b1
ENSMUSG00000005078	Jkamp
ENSMUSG00000005417	Mprip
ENSMUSG00000005506	Celf1
ENSMUSG00000005763	Cd247
ENSMUSG00000005871	Apc
ENSMUSG00000005936	Kctd20
ENSMUSG00000005980	Dnase1
ENSMUSG00000006143	Upk3bl
ENSMUSG00000006276	Eps15l1
ENSMUSG00000006423	C330007P06Rik
ENSMUSG00000006476	Nsmf
ENSMUSG00000006498	Ptbp1
ENSMUSG00000006589	Aprt
ENSMUSG00000006705	Pknox1
ENSMUSG00000007035	Msh5
ENSMUSG00000007411	Mark3
ENSMUSG00000007812	Zfp655
ENSMUSG00000008435	Rdh13
ENSMUSG00000008496	Pou2f2
ENSMUSG00000008892	Vdac3
ENSMUSG00000009035	Tmem184b
ENSMUSG00000009090	Ap1b1
ENSMUSG00000010025	Aldh3a2
ENSMUSG00000010453	Kansl3
ENSMUSG00000010608	Rbm25
ENSMUSG00000010936	Vac14
ENSMUSG00000011158	Brf1
ENSMUSG00000011257	Pabpc4
ENSMUSG00000011832	Evi5l
ENSMUSG00000012114	Med15
ENSMUSG00000012123	Crybg2
ENSMUSG00000012296	Tjap1
ENSMUSG00000012609	Ttll5
ENSMUSG00000013150	Gfod2
ENSMUSG00000013236	Ptprs
ENSMUSG00000013629	Cad
ENSMUSG00000013846	St3gal1
ENSMUSG00000014353	Tmem87b
ENSMUSG00000014402	Tsg101
ENSMUSG00000014444	Piezo1
ENSMUSG00000014554	Dguok
ENSMUSG00000014767	Tbp
ENSMUSG00000015002	Efr3a
ENSMUSG00000015120	Ube2i
ENSMUSG00000015214	Mtmr1
ENSMUSG00000015291	Gdi1
ENSMUSG00000015314	Slamf6
ENSMUSG00000015377	Dennd6b
ENSMUSG00000015605	Srf
ENSMUSG00000015702	Anxa9
ENSMUSG00000015790	Surf1
ENSMUSG00000015937	H2afy
ENSMUSG00000016481	Cr1l
ENSMUSG00000016487	Ppfibp1
ENSMUSG00000016664	Pacsin2
ENSMUSG00000016940	Kctd2
ENSMUSG00000018412	Kansl1
ENSMUSG00000018501	Ncor1
ENSMUSG00000018654	Ikzf1
ENSMUSG00000018999	Slc35b4
ENSMUSG00000019054	Fis1
ENSMUSG00000019188	H13
ENSMUSG00000019302	Atp6v0a1
ENSMUSG00000019487	Trip10
ENSMUSG00000019710	Mrpl24
ENSMUSG00000019790	Stxbp5
ENSMUSG00000019795	Pcmt1
ENSMUSG00000019813	Cep57l1
ENSMUSG00000019843	Fyn
ENSMUSG00000019854	Reps1
ENSMUSG00000019861	Gopc
ENSMUSG00000019961	Tmpo
ENSMUSG00000019971	Cep290
ENSMUSG00000019978	Epb41l2
ENSMUSG00000019996	Map7
ENSMUSG00000020063	Sirt1
ENSMUSG00000020102	Slc16a7
ENSMUSG00000020107	Anapc16
ENSMUSG00000020124	Usp15
ENSMUSG00000020131	Pcsk4
ENSMUSG00000020153	Ndufs7
ENSMUSG00000020212	Mdm1
ENSMUSG00000020271	Fbxw11
ENSMUSG00000020376	Rnf130
ENSMUSG00000020385	Clk4
ENSMUSG00000020453	Patz1
ENSMUSG00000020454	Eif4enif1
ENSMUSG00000020456	Ogdh
ENSMUSG00000020458	Rtn4
ENSMUSG00000020513	Tubd1
ENSMUSG00000020528	Prpsap2
ENSMUSG00000020553	Pctp
ENSMUSG00000020590	Snx13
ENSMUSG00000020594	Pum2
ENSMUSG00000020640	Itsn2
ENSMUSG00000020694	Tlk2
ENSMUSG00000020696	Rffl
ENSMUSG00000020744	Slc25a19
ENSMUSG00000020792	Exoc7
ENSMUSG00000020794	Ube2g1
ENSMUSG00000020798	Spns3
ENSMUSG00000020827	Mink1
ENSMUSG00000020859	Spag9
ENSMUSG00000020882	Cacnb1
ENSMUSG00000020898	Ctc1
ENSMUSG00000020917	Acly
ENSMUSG00000021000	Mia2
ENSMUSG00000021012	Zc3h14
ENSMUSG00000021027	Ralgapa1
ENSMUSG00000021124	Vti1b
ENSMUSG00000021139	Gm20498
ENSMUSG00000021185	Dglucy
ENSMUSG00000021224	Numb
ENSMUSG00000021245	Mlh3
ENSMUSG00000021262	Evl
ENSMUSG00000021271	Zfp839
ENSMUSG00000021276	Cinp
ENSMUSG00000021286	Zfyve21
ENSMUSG00000021431	Snrnp48
ENSMUSG00000021457	Syk
ENSMUSG00000021466	Ptch1
ENSMUSG00000021493	Pdlim7
ENSMUSG00000021548	Ccnh
ENSMUSG00000021569	Trip13
ENSMUSG00000021596	Mctp1
ENSMUSG00000021611	Tert
ENSMUSG00000021639	Gtf2h2
ENSMUSG00000021661	Ankra2
ENSMUSG00000021669	Col4a3bp
ENSMUSG00000021694	Ercc8
ENSMUSG00000021709	Erbin
ENSMUSG00000021711	Trappc13
ENSMUSG00000021759	Plpp1
ENSMUSG00000021772	Nkiras1
ENSMUSG00000021814	Anxa7
ENSMUSG00000021843	Ktn1
ENSMUSG00000021870	Slmap
ENSMUSG00000021916	Glt8d1
ENSMUSG00000021932	Rnaseh2b
ENSMUSG00000021962	Dcp1a
ENSMUSG00000021987	Mtmr6
ENSMUSG00000022092	Ppp3cc
ENSMUSG00000022139	Mbnl2
ENSMUSG00000022177	Haus4
ENSMUSG00000022199	Slc22a17
ENSMUSG00000022255	Mtdh
ENSMUSG00000022297	Fzd6
ENSMUSG00000022307	Oxr1
ENSMUSG00000022378	Fam49b
ENSMUSG00000022475	Hdac7
ENSMUSG00000022503	Nubp1
ENSMUSG00000022517	Mgrn1
ENSMUSG00000022546	Gpt
ENSMUSG00000022552	Sharpin
ENSMUSG00000022553	Maf1
ENSMUSG00000022562	Oplah
ENSMUSG00000022568	Scrib
ENSMUSG00000022607	Ptk2
ENSMUSG00000022617	Chkb
ENSMUSG00000022641	Bbx
ENSMUSG00000022677	Fopnl
ENSMUSG00000022678	Nde1
ENSMUSG00000022701	Ccdc191
ENSMUSG00000022724	Riox2
ENSMUSG00000022744	Cldnd1
ENSMUSG00000022773	Ypel1
ENSMUSG00000022779	Top3b
ENSMUSG00000022822	Abcc5
ENSMUSG00000022838	Eaf2
ENSMUSG00000022841	Ap2m1
ENSMUSG00000022884	Eif4a2
ENSMUSG00000022892	App
ENSMUSG00000022973	Synj1
ENSMUSG00000022983	Scaf4
ENSMUSG00000022992	Kansl2
ENSMUSG00000023007	Prpf40b
ENSMUSG00000023008	Fmnl3
ENSMUSG00000023021	Cers5
ENSMUSG00000023066	Rttn
ENSMUSG00000023079	Gtf2ird1
ENSMUSG00000023118	Sympk
ENSMUSG00000023150	Ivns1abp
ENSMUSG00000023186	Vwa5a
ENSMUSG00000023206	Il15ra
ENSMUSG00000023235	Ccl25
ENSMUSG00000023249	Parp3
ENSMUSG00000023764	Sfi1
ENSMUSG00000023861	Mpc1
ENSMUSG00000023923	Tbc1d5
ENSMUSG00000023977	Ubr2
ENSMUSG00000024002	Brd4
ENSMUSG00000024013	Fgd2
ENSMUSG00000024055	Cyp4f13
ENSMUSG00000024127	Prepl
ENSMUSG00000024150	Mcfd2
ENSMUSG00000024182	Axin1
ENSMUSG00000024236	Svil
ENSMUSG00000024381	Bin1
ENSMUSG00000024426	Atat1
ENSMUSG00000024456	Diaph1
ENSMUSG00000024457	Trim26
ENSMUSG00000024462	Gabbr1
ENSMUSG00000024491	Rbm27
ENSMUSG00000024505	Dtwd2
ENSMUSG00000024566	Atp9b
ENSMUSG00000024589	Nedd4l
ENSMUSG00000024603	Dctn4
ENSMUSG00000024610	Cd74
ENSMUSG00000024663	Rab3il1
ENSMUSG00000024766	Lipo3
ENSMUSG00000024780	Cdc37l1
ENSMUSG00000024811	Tnks2
ENSMUSG00000024818	Slc25a45
ENSMUSG00000024826	Dpf2
ENSMUSG00000024845	Tmem134
ENSMUSG00000024908	Ppp6r3
ENSMUSG00000024911	Fibp
ENSMUSG00000024937	Ehbp1l1
ENSMUSG00000024958	Gpr137
ENSMUSG00000024962	Vegfb
ENSMUSG00000024978	Gpam
ENSMUSG00000024983	Vti1a
ENSMUSG00000024985	Tcf7l2
ENSMUSG00000024989	Cep55
ENSMUSG00000025006	Sorbs1
ENSMUSG00000025059	Gk
ENSMUSG00000025085	Ablim1
ENSMUSG00000025089	Gfra1
ENSMUSG00000025144	Cenpx
ENSMUSG00000025162	Csnk1d
ENSMUSG00000025188	Hps1
ENSMUSG00000025193	Cutc
ENSMUSG00000025217	Btrc
ENSMUSG00000025237	Parp6
ENSMUSG00000025261	Huwe1
ENSMUSG00000025316	Banp
ENSMUSG00000025369	Smarcc2
ENSMUSG00000025372	Baiap2
ENSMUSG00000025404	R3hdm2
ENSMUSG00000025484	Bet1l
ENSMUSG00000025494	Sigirr
ENSMUSG00000025498	Irf7
ENSMUSG00000025505	Tmem80
ENSMUSG00000025521	Tmem192
ENSMUSG00000025558	Dock9
ENSMUSG00000025571	Tnrc6c
ENSMUSG00000025583	Rptor
ENSMUSG00000025602	Zfp202
ENSMUSG00000025656	Arhgef9
ENSMUSG00000025747	Tyms
ENSMUSG00000025766	D3Ertd751e
ENSMUSG00000025780	Itih5
ENSMUSG00000025816	Sec61a2
ENSMUSG00000025860	Xiap
ENSMUSG00000025871	4833439L19Rik
ENSMUSG00000025949	Pikfyve
ENSMUSG00000025958	Creb1
ENSMUSG00000025968	Ndufs1
ENSMUSG00000025977	Boll
ENSMUSG00000026029	Casp8
ENSMUSG00000026068	Il18rap
ENSMUSG00000026074	Map4k4
ENSMUSG00000026082	Rev1
ENSMUSG00000026155	Smap1
ENSMUSG00000026159	Agfg1
ENSMUSG00000026200	Glb1l
ENSMUSG00000026222	Sp100
ENSMUSG00000026254	Eif4e2
ENSMUSG00000026269	Rnpepl1
ENSMUSG00000026289	Atg16l1
ENSMUSG00000026305	Lrrfip1
ENSMUSG00000026311	Asb1
ENSMUSG00000026319	Relch
ENSMUSG00000026395	Ptprc
ENSMUSG00000026399	Cd55
ENSMUSG00000026414	Tnnt2
ENSMUSG00000026471	Mr1
ENSMUSG00000026504	Sdccag8
ENSMUSG00000026556	Vangl2
ENSMUSG00000026594	Ralgps2
ENSMUSG00000026617	Bpnt1
ENSMUSG00000026634	Angel2
ENSMUSG00000026730	Pter
ENSMUSG00000026737	Pip4k2a
ENSMUSG00000026743	Mllt10
ENSMUSG00000026767	Mindy3
ENSMUSG00000026773	Pfkfb3
ENSMUSG00000026782	Abi2
ENSMUSG00000026790	Odf2
ENSMUSG00000026811	St6galnac6
ENSMUSG00000026860	Sh3glb2
ENSMUSG00000026955	Sapcd2
ENSMUSG00000026972	Arrdc1
ENSMUSG00000026987	Baz2b
ENSMUSG00000026988	Wdsub1
ENSMUSG00000026991	Pkp4
ENSMUSG00000027166	Dnajc24
ENSMUSG00000027244	Atg13
ENSMUSG00000027281	Slx4ip
ENSMUSG00000027303	Ptpra
ENSMUSG00000027326	Knl1
ENSMUSG00000027333	Smox
ENSMUSG00000027357	Crls1
ENSMUSG00000027361	Gabpb1
ENSMUSG00000027365	Trpm7
ENSMUSG00000027378	Nphp1
ENSMUSG00000027406	Idh3b
ENSMUSG00000027506	Tpd52
ENSMUSG00000027523	Gnas
ENSMUSG00000027550	Lrrcc1
ENSMUSG00000027605	Acss2
ENSMUSG00000027620	Rbm39
ENSMUSG00000027680	Fxr1
ENSMUSG00000027722	Spata5
ENSMUSG00000027751	Supt20
ENSMUSG00000027763	Mbnl1
ENSMUSG00000027806	Tsc22d2
ENSMUSG00000027936	Crtc2
ENSMUSG00000027940	Tpm3
ENSMUSG00000027951	Adar
ENSMUSG00000027957	Slc35a3
ENSMUSG00000028024	Enpep
ENSMUSG00000028034	Fubp1
ENSMUSG00000028037	Ifi44
ENSMUSG00000028057	Rit1
ENSMUSG00000028078	Dclk2
ENSMUSG00000028086	Fbxw7
ENSMUSG00000028102	Pex11b
ENSMUSG00000028134	Ptbp2
ENSMUSG00000028152	Tspan5
ENSMUSG00000028161	Ppp3ca
ENSMUSG00000028163	Nfkb1
ENSMUSG00000028175	Depdc1a
ENSMUSG00000028273	Pdlim5
ENSMUSG00000028382	Ptbp3
ENSMUSG00000028438	Kif24
ENSMUSG00000028459	Cd72
ENSMUSG00000028464	Tpm2
ENSMUSG00000028478	Clta
ENSMUSG00000028484	Psip1
ENSMUSG00000028521	Slc35d1
ENSMUSG00000028522	Mier1
ENSMUSG00000028559	Osbpl9
ENSMUSG00000028573	Fggy
ENSMUSG00000028580	Pum1
ENSMUSG00000028621	Cyb5rl
ENSMUSG00000028677	Rnf220
ENSMUSG00000028678	Kif2c
ENSMUSG00000028689	Ccdc163
ENSMUSG00000028708	Mknk1
ENSMUSG00000028745	Capzb
ENSMUSG00000028759	Hp1bp3
ENSMUSG00000028760	Eif4g3
ENSMUSG00000028797	Tmem234
ENSMUSG00000028832	Stmn1
ENSMUSG00000028863	Meaf6
ENSMUSG00000028878	Fam76a
ENSMUSG00000028898	Trnau1ap
ENSMUSG00000028923	Necap2
ENSMUSG00000028931	Kcnab2
ENSMUSG00000028999	Rint1
ENSMUSG00000029001	Fbxo44
ENSMUSG00000029020	Mfn2
ENSMUSG00000029071	Dvl1
ENSMUSG00000029084	Cd38
ENSMUSG00000029106	Add1
ENSMUSG00000029128	Rab28
ENSMUSG00000029165	Agbl5
ENSMUSG00000029174	Tbc1d1
ENSMUSG00000029177	Cenpa
ENSMUSG00000029185	Fam114a1
ENSMUSG00000029192	Tbc1d14
ENSMUSG00000029254	Stap1
ENSMUSG00000029267	Mtf2
ENSMUSG00000029422	Rsrc2
ENSMUSG00000029428	Stx2
ENSMUSG00000029462	Vps29
ENSMUSG00000029470	P2rx4
ENSMUSG00000029471	Camkk2
ENSMUSG00000029472	Anapc5
ENSMUSG00000029505	Ep400
ENSMUSG00000029521	Chek2
ENSMUSG00000029528	Pxn
ENSMUSG00000029625	Cpsf4
ENSMUSG00000029629	Phf14
ENSMUSG00000029655	N4bp2l2
ENSMUSG00000029705	Cux1
ENSMUSG00000029716	Tfr2
ENSMUSG00000029722	Agfg2
ENSMUSG00000029822	Osbpl3
ENSMUSG00000029994	Anxa4
ENSMUSG00000030016	Zfp638
ENSMUSG00000030126	Tmcc1
ENSMUSG00000030172	Erc1
ENSMUSG00000030180	Kdm5a
ENSMUSG00000030231	Plekha5
ENSMUSG00000030254	Rad18
ENSMUSG00000030263	Lrmp
ENSMUSG00000030279	C2cd5
ENSMUSG00000030336	Cd27
ENSMUSG00000030374	Strn4
ENSMUSG00000030431	Tmem238
ENSMUSG00000030468	Siglecg
ENSMUSG00000030498	Gas2
ENSMUSG00000030536	Iqgap1
ENSMUSG00000030538	Cib1
ENSMUSG00000030556	Lrrc28
ENSMUSG00000030605	Mfge8
ENSMUSG00000030616	Sytl2
ENSMUSG00000030649	Anapc15
ENSMUSG00000030670	Cyp2r1
ENSMUSG00000030733	Sh2b1
ENSMUSG00000030766	Arhgap17
ENSMUSG00000030780	BC017158
ENSMUSG00000030798	Cd37
ENSMUSG00000030815	Phkg2
ENSMUSG00000030850	Ate1
ENSMUSG00000030881	Arfip2
ENSMUSG00000030924	Rexo5
ENSMUSG00000030956	Fam53b
ENSMUSG00000030960	Eef1akmt2
ENSMUSG00000030990	Pgap2
ENSMUSG00000031105	Slc25a14
ENSMUSG00000031137	Fgf13
ENSMUSG00000031153	Gripap1
ENSMUSG00000031216	Stard8
ENSMUSG00000031229	Atrx
ENSMUSG00000031255	Sytl4
ENSMUSG00000031256	Cstf2
ENSMUSG00000031310	Zmym3
ENSMUSG00000031314	Taf1
ENSMUSG00000031342	Gpm6b
ENSMUSG00000031371	Haus7
ENSMUSG00000031422	Morf4l2
ENSMUSG00000031483	Erlin2
ENSMUSG00000031508	Ankrd10
ENSMUSG00000031629	Cenpu
ENSMUSG00000031631	Cfap97
ENSMUSG00000031644	Nek1
ENSMUSG00000031729	Ist1
ENSMUSG00000031851	Ntpcr
ENSMUSG00000031865	Dctn1
ENSMUSG00000031903	Pla2g15
ENSMUSG00000031907	Zfp90
ENSMUSG00000031928	Mre11a
ENSMUSG00000032058	Ppp2r1b
ENSMUSG00000032059	Alg9
ENSMUSG00000032103	Pus3
ENSMUSG00000032114	Slc37a4
ENSMUSG00000032175	Tyk2
ENSMUSG00000032185	Carm1
ENSMUSG00000032217	Rnf111
ENSMUSG00000032235	Ice2
ENSMUSG00000032267	Usp28
ENSMUSG00000032280	Tle3
ENSMUSG00000032294	Pkm
ENSMUSG00000032299	Commd4
ENSMUSG00000032300	1700017B05Rik
ENSMUSG00000032307	Ube2q2
ENSMUSG00000032366	Tpm1
ENSMUSG00000032409	Atr
ENSMUSG00000032411	Tfdp2
ENSMUSG00000032422	Snx14
ENSMUSG00000032468	Armc8
ENSMUSG00000032479	Map4
ENSMUSG00000032497	Lrrfip2
ENSMUSG00000032503	Arpp21
ENSMUSG00000032504	Pdcd6ip
ENSMUSG00000032594	Ip6k1
ENSMUSG00000032624	Eml4
ENSMUSG00000032806	Slc10a3
ENSMUSG00000032946	Rasgrp2
ENSMUSG00000032952	Ap4b1
ENSMUSG00000032966	Fkbp1a
ENSMUSG00000032998	Foxj3
ENSMUSG00000033075	Senp1
ENSMUSG00000033111	3830406C13Rik
ENSMUSG00000033255	Gm5134
ENSMUSG00000033256	Shf
ENSMUSG00000033287	Kctd17
ENSMUSG00000033335	Dnm2
ENSMUSG00000033423	Eri3
ENSMUSG00000033460	Armcx1
ENSMUSG00000033488	Cryzl2
ENSMUSG00000033526	Ppip5k1
ENSMUSG00000033530	Ttc7b
ENSMUSG00000033543	Gtf2a2
ENSMUSG00000033557	Fam20b
ENSMUSG00000033767	Tmem131l
ENSMUSG00000033793	Atp6v1h
ENSMUSG00000033799	Fam208b
ENSMUSG00000034252	Senp6
ENSMUSG00000034269	Setd5
ENSMUSG00000034274	Thoc5
ENSMUSG00000034303	Ccdc15
ENSMUSG00000034333	Zbed4
ENSMUSG00000034334	Fam151b
ENSMUSG00000034354	Mtmr3
ENSMUSG00000034401	Spata6
ENSMUSG00000034566	Atp5h
ENSMUSG00000034610	Tut4
ENSMUSG00000034647	Ankrd12
ENSMUSG00000034681	Rnps1
ENSMUSG00000034758	Tle6
ENSMUSG00000034826	Nup54
ENSMUSG00000034832	Tet3
ENSMUSG00000034833	Tespa1
ENSMUSG00000034902	Pip5k1c
ENSMUSG00000034903	Cobll1
ENSMUSG00000034908	Sidt2
ENSMUSG00000034940	Synrg
ENSMUSG00000034959	Rubcnl
ENSMUSG00000034987	Hrh2
ENSMUSG00000035000	Dpp4
ENSMUSG00000035069	Oma1
ENSMUSG00000035152	Ap2b1
ENSMUSG00000035325	Sec31a
ENSMUSG00000035392	Dennd1a
ENSMUSG00000035455	Fignl1
ENSMUSG00000035504	Reep6
ENSMUSG00000035620	Ric8b
ENSMUSG00000035762	Tmem161b
ENSMUSG00000035901	Dennd5a
ENSMUSG00000035958	Tdp2
ENSMUSG00000035967	Ints6l
ENSMUSG00000036054	Sugp2
ENSMUSG00000036109	Mbnl3
ENSMUSG00000036180	Gatad2a
ENSMUSG00000036202	Rif1
ENSMUSG00000036208	Nepro
ENSMUSG00000036333	Kidins220
ENSMUSG00000036371	Serbp1
ENSMUSG00000036402	Gng12
ENSMUSG00000036411	9530077C05Rik
ENSMUSG00000036435	Exoc1
ENSMUSG00000036502	Tmem255a
ENSMUSG00000036503	Rnf13
ENSMUSG00000036553	Sh3tc1
ENSMUSG00000036561	Ppp6r2
ENSMUSG00000036606	Plxnb2
ENSMUSG00000036644	Tbc1d9b
ENSMUSG00000036712	Cyld
ENSMUSG00000036817	Sun1
ENSMUSG00000036825	Ssx2ip
ENSMUSG00000036882	Arhgap33
ENSMUSG00000036893	Ehmt1
ENSMUSG00000036902	Neto2
ENSMUSG00000036918	Ttc7
ENSMUSG00000036923	Stox1
ENSMUSG00000036928	Stag3
ENSMUSG00000036948	BC037034
ENSMUSG00000036986	Pml
ENSMUSG00000037013	Ss18
ENSMUSG00000037020	Wdr62
ENSMUSG00000037022	Mmaa
ENSMUSG00000037112	Sik2
ENSMUSG00000037174	Elf2
ENSMUSG00000037210	Fam193a
ENSMUSG00000037262	Kin
ENSMUSG00000037318	Traf3ip3
ENSMUSG00000037326	Capn15
ENSMUSG00000037341	Slc9a7
ENSMUSG00000037369	Kdm6a
ENSMUSG00000037395	Rcor3
ENSMUSG00000037426	Depdc5
ENSMUSG00000037514	Pank2
ENSMUSG00000037523	Mavs
ENSMUSG00000037536	Fbxo34
ENSMUSG00000037552	Plekhg2
ENSMUSG00000037685	Atp8a1
ENSMUSG00000037697	Ddhd1
ENSMUSG00000037722	Gnpnat1
ENSMUSG00000037773	Pced1a
ENSMUSG00000037795	N4bp2
ENSMUSG00000037849	Ifi206
ENSMUSG00000037860	Aim2
ENSMUSG00000037876	Jmjd1c
ENSMUSG00000037913	Tmem156
ENSMUSG00000037936	Scarb1
ENSMUSG00000037938	Chchd5
ENSMUSG00000037957	Wdr20
ENSMUSG00000037960	Card19
ENSMUSG00000038005	Hpf1
ENSMUSG00000038084	Opa1
ENSMUSG00000038095	Sbno1
ENSMUSG00000038116	Phf20
ENSMUSG00000038174	Fam126b
ENSMUSG00000038187	Btbd10
ENSMUSG00000038215	Cep44
ENSMUSG00000038241	Cep250
ENSMUSG00000038271	Iffo1
ENSMUSG00000038365	Fbxo25
ENSMUSG00000038369	Ncoa6
ENSMUSG00000038425	Poli
ENSMUSG00000038429	Usp5
ENSMUSG00000038506	Dcun1d2
ENSMUSG00000038578	Susd1
ENSMUSG00000038608	Dock10
ENSMUSG00000038671	Arfrp1
ENSMUSG00000038685	Rtel1
ENSMUSG00000038780	Smurf1
ENSMUSG00000038828	Tmem214
ENSMUSG00000038866	Zcchc2
ENSMUSG00000038909	Kat7
ENSMUSG00000038943	Prc1
ENSMUSG00000039005	Tlr4
ENSMUSG00000039068	Zzz3
ENSMUSG00000039069	Mtg2
ENSMUSG00000039089	L3mbtl3
ENSMUSG00000039108	Lsm14b
ENSMUSG00000039285	Azi2
ENSMUSG00000039298	Cdk5rap2
ENSMUSG00000039345	Mettl22
ENSMUSG00000039361	Picalm
ENSMUSG00000039456	Morc3
ENSMUSG00000039648	Kyat1
ENSMUSG00000039662	Icmt
ENSMUSG00000039671	Zmynd8
ENSMUSG00000039844	Rapgef1
ENSMUSG00000039929	Urb1
ENSMUSG00000039936	Pik3cd
ENSMUSG00000039943	Plcb4
ENSMUSG00000039952	Dag1
ENSMUSG00000039990	Edrf1
ENSMUSG00000040213	Kyat3
ENSMUSG00000040231	Syngr4
ENSMUSG00000040297	Suco
ENSMUSG00000040345	Arhgap9
ENSMUSG00000040354	Mars
ENSMUSG00000040363	Bcor
ENSMUSG00000040374	Pex2
ENSMUSG00000040407	Akap9
ENSMUSG00000040430	Pitpnc1
ENSMUSG00000040455	Usp45
ENSMUSG00000040483	Xaf1
ENSMUSG00000040511	Pvr
ENSMUSG00000040560	Wdr7
ENSMUSG00000040621	Gemin8
ENSMUSG00000040648	Ppip5k2
ENSMUSG00000040651	Fam208a
ENSMUSG00000040663	Clcf1
ENSMUSG00000040669	Phc1
ENSMUSG00000040687	Madd
ENSMUSG00000040723	Rcsd1
ENSMUSG00000040761	Spen
ENSMUSG00000040785	Ttc3
ENSMUSG00000040811	Eml2
ENSMUSG00000040813	Tex264
ENSMUSG00000040929	Rfx3
ENSMUSG00000040940	Arhgef1
ENSMUSG00000040945	Rcc2
ENSMUSG00000040990	Sh3kbp1
ENSMUSG00000041112	Elmo1
ENSMUSG00000041132	N4bp2l1
ENSMUSG00000041135	Ripk2
ENSMUSG00000041215	Yeats2
ENSMUSG00000041225	Arhgap12
ENSMUSG00000041264	Uspl1
ENSMUSG00000041459	Tardbp
ENSMUSG00000041623	D11Wsu47e
ENSMUSG00000041658	Rragb
ENSMUSG00000041718	Alg13
ENSMUSG00000041769	Ppp2r2d
ENSMUSG00000041815	Poldip3
ENSMUSG00000041975	Mettl8
ENSMUSG00000042178	Armc5
ENSMUSG00000042210	Abhd14a
ENSMUSG00000042213	Zfand4
ENSMUSG00000042323	Pbrm1
ENSMUSG00000042404	Dennd4b
ENSMUSG00000042520	Ubap2l
ENSMUSG00000042590	Ipo11
ENSMUSG00000042594	Sh2b3
ENSMUSG00000042605	Atxn2
ENSMUSG00000042632	Pla2g6
ENSMUSG00000042708	Shcbp1l
ENSMUSG00000042726	Trafd1
ENSMUSG00000042772	Smg7
ENSMUSG00000043015	Nemp2
ENSMUSG00000043384	Gprasp1
ENSMUSG00000043411	Usp48
ENSMUSG00000043592	Unc5cl
ENSMUSG00000043671	Dpy19l3
ENSMUSG00000043831	Lysmd4
ENSMUSG00000044250	Pced1b
ENSMUSG00000044465	Fam160a2
ENSMUSG00000044876	Zfp444
ENSMUSG00000044966	Fbxo48
ENSMUSG00000045031	Cetn4
ENSMUSG00000045078	Rnf216
ENSMUSG00000045411	2410002F23Rik
ENSMUSG00000045427	Hnrnph2
ENSMUSG00000046111	Cep295
ENSMUSG00000046201	Scaf8
ENSMUSG00000046295	Ankle1
ENSMUSG00000046311	Zfp62
ENSMUSG00000046707	Csnk2a2
ENSMUSG00000046873	Mbtps2
ENSMUSG00000046949	Nqo2
ENSMUSG00000046985	Tapt1
ENSMUSG00000047090	Tmem198b
ENSMUSG00000047153	Khnyn
ENSMUSG00000047412	Zbtb44
ENSMUSG00000047766	Lrrc49
ENSMUSG00000047767	Atg16l2
ENSMUSG00000048234	Rnf149
ENSMUSG00000048677	Tpcn2
ENSMUSG00000048874	Phf3
ENSMUSG00000048930	Tada3
ENSMUSG00000049038	Mterf2
ENSMUSG00000049076	Acap2
ENSMUSG00000049295	Zfp219
ENSMUSG00000049327	Kmt5a
ENSMUSG00000049550	Clip1
ENSMUSG00000049643	2310022A10Rik
ENSMUSG00000049658	Bdp1
ENSMUSG00000049659	Aftph
ENSMUSG00000049755	Zfp672
ENSMUSG00000049871	Nlrc3
ENSMUSG00000050017	Pitpnb
ENSMUSG00000050323	Ndufaf6
ENSMUSG00000050379	Sept6
ENSMUSG00000050410	Tcf19
ENSMUSG00000050891	Tatdn1
ENSMUSG00000051736	Fam229b
ENSMUSG00000051998	Lax1
ENSMUSG00000052337	Immt
ENSMUSG00000052384	Nrros
ENSMUSG00000052423	B4galt3
ENSMUSG00000052707	Tnrc6a
ENSMUSG00000052752	Traf7
ENSMUSG00000052760	A630001G21Rik
ENSMUSG00000053333	Dis3l2
ENSMUSG00000053436	Mapk14
ENSMUSG00000053477	Tcf4
ENSMUSG00000054099	Slc25a40
ENSMUSG00000054426	A930005H10Rik
ENSMUSG00000054702	Ap1s3
ENSMUSG00000054808	Actn4
ENSMUSG00000054836	Elp6
ENSMUSG00000055531	Cpsf6
ENSMUSG00000055541	Lair1
ENSMUSG00000055692	Tmem191c
ENSMUSG00000055725	Paqr3
ENSMUSG00000055762	Eef1d
ENSMUSG00000055805	Fmnl1
ENSMUSG00000055884	Fancm
ENSMUSG00000055897	Ppp4r1l-ps
ENSMUSG00000055991	Zkscan5
ENSMUSG00000056069	Otulinl
ENSMUSG00000056121	Fez2
ENSMUSG00000056211	R3hdm1
ENSMUSG00000056268	Dennd1b
ENSMUSG00000056383	AI987944
ENSMUSG00000056763	Cspp1
ENSMUSG00000057335	Cep170
ENSMUSG00000057337	Chst3
ENSMUSG00000057551	Zfp317
ENSMUSG00000057554	Lgals8
ENSMUSG00000057596	Trim30d
ENSMUSG00000057897	Camk2b
ENSMUSG00000058013	Sept11
ENSMUSG00000058318	Phf21a
ENSMUSG00000058388	Phtf1
ENSMUSG00000058392	Rrp1b
ENSMUSG00000058835	Abi1
ENSMUSG00000059119	Nap1l4
ENSMUSG00000059142	Zfp945
ENSMUSG00000059149	Mfsd4a
ENSMUSG00000059208	Hnrnpm
ENSMUSG00000059263	Usp47
ENSMUSG00000059305	Vpreb1
ENSMUSG00000059436	Max
ENSMUSG00000059518	Znhit1
ENSMUSG00000059540	Tcea2
ENSMUSG00000059851	Kmt5c
ENSMUSG00000059995	Atxn7l3
ENSMUSG00000060131	Atp8b4
ENSMUSG00000060279	Ap2a1
ENSMUSG00000060470	Adgrg3
ENSMUSG00000060550	H2-Q7
ENSMUSG00000060601	Nr1h2
ENSMUSG00000061306	Slc38a10
ENSMUSG00000061533	Cep128
ENSMUSG00000061689	Dlgap4
ENSMUSG00000061740	Cyp2d22
ENSMUSG00000061755	Bod1l
ENSMUSG00000061887	Ssbp3
ENSMUSG00000061904	Slc25a3
ENSMUSG00000062232	Rapgef2
ENSMUSG00000062729	Ppox
ENSMUSG00000062861	Zfp28
ENSMUSG00000062949	Atp11c
ENSMUSG00000063052	Lrrc40
ENSMUSG00000063179	Pstk
ENSMUSG00000063889	Crem
ENSMUSG00000064210	Ano6
ENSMUSG00000064215	Ifi27
ENSMUSG00000064289	Tank
ENSMUSG00000066043	Phactr4
ENSMUSG00000066406	Akap13
ENSMUSG00000066568	Lsm14a
ENSMUSG00000066892	Fbxl12
ENSMUSG00000068134	Zfp120
ENSMUSG00000068394	Cep152
ENSMUSG00000068663	Clec16a
ENSMUSG00000068735	Trp53i11
ENSMUSG00000069094	Pde7a
ENSMUSG00000069631	Strada
ENSMUSG00000069769	Msi2
ENSMUSG00000070003	Ssbp4
ENSMUSG00000070972	Dnajc25
ENSMUSG00000071226	Cecr2
ENSMUSG00000071253	Slc25a16
ENSMUSG00000071350	Setdb2
ENSMUSG00000071454	Dtnb
ENSMUSG00000071650	Ganab
ENSMUSG00000072501	Phf20l1
ENSMUSG00000072704	Smim10l1
ENSMUSG00000073491	Ifi213
ENSMUSG00000073563	Csnk1g3
ENSMUSG00000073792	Alg6
ENSMUSG00000074151	Nlrc5
ENSMUSG00000074165	Zfp788
ENSMUSG00000074238	Ap1ar
ENSMUSG00000074272	Ceacam1
ENSMUSG00000074513	Arfip1
ENSMUSG00000074582	Arfgef2
ENSMUSG00000074643	Cpne1
ENSMUSG00000074829	2010315B03Rik
ENSMUSG00000075415	Fnbp1
ENSMUSG00000078812	Eif5a
ENSMUSG00000079179	Rab10os
ENSMUSG00000079557	March2
ENSMUSG00000079563	Pglyrp2
ENSMUSG00000079658	Eloc
ENSMUSG00000079845	Xlr4a
ENSMUSG00000083012	Fam220a
ENSMUSG00000083161	Gm11427
ENSMUSG00000083844	Ube2d-ps
ENSMUSG00000084866	A930006K02Rik
ENSMUSG00000084925	1810062O18Rik
ENSMUSG00000085385	Snhg17
ENSMUSG00000085399	Foxd2os
ENSMUSG00000085741	5430405H02Rik
ENSMUSG00000085936	2610307P16Rik
ENSMUSG00000086629	2810403D21Rik
ENSMUSG00000087174	5530601H04Rik
ENSMUSG00000087177	E130307A14Rik
ENSMUSG00000087574	C030037D09Rik
ENSMUSG00000089889	0610040B10Rik
ENSMUSG00000090626	Tex9
ENSMUSG00000090841	Myl6
ENSMUSG00000092203	1110038B12Rik
ENSMUSG00000092416	Zfp141
ENSMUSG00000094936	Rbm4
ENSMUSG00000096370	Gm21992
ENSMUSG00000097121	D130020L05Rik
ENSMUSG00000097145	9230114K14Rik
ENSMUSG00000097290	1300002E11Rik
ENSMUSG00000097589	Dleu2
ENSMUSG00000097709	2810429I04Rik
ENSMUSG00000097755	2010110K18Rik
ENSMUSG00000098090	2700099C18Rik
ENSMUSG00000099481	Xndc1
ENSMUSG00000102644	Thap6
ENSMUSG00000107283	Mpv17
ENSMUSG00000109378	Gm49396
ENSMUSG00000109975	Gm19196
ENSMUSG00000113204	Gm46430
ENSMUSG00000116207	Nnt
ENSMUSG00000116673	A630089N07Rik
ENSMUSG00000116953	9030025P20Rik

## Sheet: GO_AlternativeSplicing 
GO_PROCESS
GO Term	Description	P-value	FDR q-value	Enrichment	N	B	n	b	Genes
GO:0032502	developmental process	2.88e-08	0.000371	1.34	9758	2220	857	261	[Abi2 - abl-interactor 2, Phactr4 - phosphatase and actin regulator 4, Lsm14b - lsm14 homolog b (scd6, s. cerevisiae), Ikzf1 - ikaros family zinc finger 1, Ist1 - increased sodium tolerance 1 homolog (yeast), Abi1 - abl-interactor 1, Ptk2 - ptk2 protein tyrosine kinase 2, Camk2b - calcium/calmodulin-dependent protein kinase ii, beta, Dis3l2 - dis3 mitotic control homolog (s. cerevisiae)-like 2, B…
GO:0048856	anatomical structure development	6.07e-08	0.000391	1.43	9758	1471	857	185	[Abi2 - abl-interactor 2, Phactr4 - phosphatase and actin regulator 4, Lsm14b - lsm14 homolog b (scd6, s. cerevisiae), Ikzf1 - ikaros family zinc finger 1, Phf14 - phd finger protein 14, Nr1h2 - nuclear receptor subfamily 1, group h, member 2, Nphp1 - nephronophthisis 1 (juvenile) homolog (human), Abi1 - abl-interactor 1, Ptk2 - ptk2 protein tyrosine kinase 2, Pkm - pyruvate kinase, muscle, Camk2…
GO:0051128	regulation of cellular component organization	3.24e-07	0.00139	1.4	9758	1495	857	184	[Abi2 - abl-interactor 2, Gdi1 - guanosine diphosphate (gdp) dissociation inhibitor 1, Ikzf1 - ikaros family zinc finger 1, Nr1h2 - nuclear receptor subfamily 1, group h, member 2, Ist1 - increased sodium tolerance 1 homolog (yeast), Nphp1 - nephronophthisis 1 (juvenile) homolog (human), Plekhg2 - pleckstrin homology domain containing, family g (with rhogef domain) member 2, Pdlim5 - pdz and lim …
GO:0060284	regulation of cell development	1.28e-06	0.00412	1.72	9758	502	857	76	[Il15ra - interleukin 15 receptor, alpha chain, Csnk1d - casein kinase 1, delta, Gdi1 - guanosine diphosphate (gdp) dissociation inhibitor 1, Golga2 - golgi autoantigen, golgin subfamily a, 2, Ist1 - increased sodium tolerance 1 homolog (yeast), Spag9 - sperm associated antigen 9, Pdlim5 - pdz and lim domain 5, Ptk2 - ptk2 protein tyrosine kinase 2, Creb1 - camp responsive element binding protein…
GO:0051130	positive regulation of cellular component organization	2.39e-06	0.00615	1.56	9758	754	857	103	[Abi2 - abl-interactor 2, Ikzf1 - ikaros family zinc finger 1, Gdi1 - guanosine diphosphate (gdp) dissociation inhibitor 1, Nr1h2 - nuclear receptor subfamily 1, group h, member 2, Ist1 - increased sodium tolerance 1 homolog (yeast), Nphp1 - nephronophthisis 1 (juvenile) homolog (human), Ptk2 - ptk2 protein tyrosine kinase 2, Camk2b - calcium/calmodulin-dependent protein kinase ii, beta, Tnks2 - …
GO:0051960	regulation of nervous system development	3.15e-06	0.00677	1.72	9758	470	857	71	[Il15ra - interleukin 15 receptor, alpha chain, Csnk1d - casein kinase 1, delta, Gdi1 - guanosine diphosphate (gdp) dissociation inhibitor 1, Golga2 - golgi autoantigen, golgin subfamily a, 2, Ist1 - increased sodium tolerance 1 homolog (yeast), Spag9 - sperm associated antigen 9, Pdlim5 - pdz and lim domain 5, Ptk2 - ptk2 protein tyrosine kinase 2, Creb1 - camp responsive element binding protein…
GO:0050767	regulation of neurogenesis	4.58e-06	0.00842	1.73	9758	440	857	67	[Il15ra - interleukin 15 receptor, alpha chain, Csnk1d - casein kinase 1, delta, Gdi1 - guanosine diphosphate (gdp) dissociation inhibitor 1, Golga2 - golgi autoantigen, golgin subfamily a, 2, Ist1 - increased sodium tolerance 1 homolog (yeast), Spag9 - sperm associated antigen 9, Pdlim5 - pdz and lim domain 5, Ptk2 - ptk2 protein tyrosine kinase 2, Creb1 - camp responsive element binding protein…
GO:0051094	positive regulation of developmental process	5.27e-06	0.00848	1.56	9758	693	857	95	[Il15ra - interleukin 15 receptor, alpha chain, Gpam - glycerol-3-phosphate acyltransferase, mitochondrial, Csnk1d - casein kinase 1, delta, Ramp2 - receptor (calcitonin) activity modifying protein 2, Gdi1 - guanosine diphosphate (gdp) dissociation inhibitor 1, Golga2 - golgi autoantigen, golgin subfamily a, 2, Ikzf1 - ikaros family zinc finger 1, Ist1 - increased sodium tolerance 1 homolog (yeas…
GO:0030100	regulation of endocytosis	6.01e-06	0.0086	2.26	9758	166	857	33	[Il15ra - interleukin 15 receptor, alpha chain, Nr1h2 - nuclear receptor subfamily 1, group h, member 2, Atxn2 - ataxin 2, Actn4 - actinin alpha 4, Ptk2 - ptk2 protein tyrosine kinase 2, Smap1 - stromal membrane-associated protein 1, Ap2a1 - adaptor-related protein complex 2, alpha 1 subunit, Add1 - adducin 1 (alpha), Scrib - scribbled homolog (drosophila), Scarb1 - scavenger receptor class b, me…
GO:0045597	positive regulation of cell differentiation	6.13e-06	0.0079	1.65	9758	523	857	76	[Il15ra - interleukin 15 receptor, alpha chain, Csnk1d - casein kinase 1, delta, Ramp2 - receptor (calcitonin) activity modifying protein 2, Gdi1 - guanosine diphosphate (gdp) dissociation inhibitor 1, Golga2 - golgi autoantigen, golgin subfamily a, 2, Ikzf1 - ikaros family zinc finger 1, Ist1 - increased sodium tolerance 1 homolog (yeast), Zfp219 - zinc finger protein 219, H2afy - h2a histone fa…
GO:0022603	regulation of anatomical structure morphogenesis	6.41e-06	0.00751	1.67	9758	497	857	73	[Ramp2 - receptor (calcitonin) activity modifying protein 2, Gdi1 - guanosine diphosphate (gdp) dissociation inhibitor 1, Golga2 - golgi autoantigen, golgin subfamily a, 2, Ist1 - increased sodium tolerance 1 homolog (yeast), Pdlim5 - pdz and lim domain 5, Ptk2 - ptk2 protein tyrosine kinase 2, Pkm - pyruvate kinase, muscle, Carm1 - coactivator-associated arginine methyltransferase 1, Camk2b - ca…
GO:0045664	regulation of neuron differentiation	7.98e-06	0.00857	1.8	9758	361	857	57	[Il15ra - interleukin 15 receptor, alpha chain, Csnk1d - casein kinase 1, delta, Golga2 - golgi autoantigen, golgin subfamily a, 2, Gdi1 - guanosine diphosphate (gdp) dissociation inhibitor 1, Ist1 - increased sodium tolerance 1 homolog (yeast), Ptk2 - ptk2 protein tyrosine kinase 2, Pdlim5 - pdz and lim domain 5, Spag9 - sperm associated antigen 9, Cd38 - cd38 antigen, Camk2b - calcium/calmoduli…
GO:0032501	multicellular organismal process	1.1e-05	0.0109	1.37	9758	1324	857	159	[Abi2 - abl-interactor 2, Phactr4 - phosphatase and actin regulator 4, Lsm14b - lsm14 homolog b (scd6, s. cerevisiae), Csnk1d - casein kinase 1, delta, Ikzf1 - ikaros family zinc finger 1, Oxr1 - oxidation resistance 1, Clcn3 - chloride channel 3, Mr1 - major histocompatibility complex, class i-related, Nr1h2 - nuclear receptor subfamily 1, group h, member 2, Abi1 - abl-interactor 1, Ptk2 - ptk2 …
GO:0045807	positive regulation of endocytosis	1.12e-05	0.0103	2.65	9758	99	857	23	[Il15ra - interleukin 15 receptor, alpha chain, Ano6 - anoctamin 6, Tfr2 - transferrin receptor 2, Nedd4l - neural precursor cell expressed, developmentally down-regulated gene 4-like, Tsg101 - tumor susceptibility gene 101, Ptprc - protein tyrosine phosphatase, receptor type, c, Actn4 - actinin alpha 4, Ppp3cc - protein phosphatase 3, catalytic subunit, gamma isoform, Stap1 - signal transducing …
GO:0050793	regulation of developmental process	1.9e-05	0.0163	1.37	9758	1257	857	151	[Csnk1d - casein kinase 1, delta, Gdi1 - guanosine diphosphate (gdp) dissociation inhibitor 1, Ikzf1 - ikaros family zinc finger 1, Phf14 - phd finger protein 14, Ist1 - increased sodium tolerance 1 homolog (yeast), Zfp219 - zinc finger protein 219, Spag9 - sperm associated antigen 9, Pdlim5 - pdz and lim domain 5, Ptk2 - ptk2 protein tyrosine kinase 2, Pkm - pyruvate kinase, muscle, Camk2b - cal…
GO:0022604	regulation of cell morphogenesis	2.03e-05	0.0163	1.89	9758	271	857	45	[Golga2 - golgi autoantigen, golgin subfamily a, 2, Gdi1 - guanosine diphosphate (gdp) dissociation inhibitor 1, Ist1 - increased sodium tolerance 1 homolog (yeast), Pxn - paxillin, Actn4 - actinin alpha 4, Ptk2 - ptk2 protein tyrosine kinase 2, Pdlim5 - pdz and lim domain 5, Camk2b - calcium/calmodulin-dependent protein kinase ii, beta, Srf - serum response factor, Braf - braf transforming gene,…
GO:0048869	cellular developmental process	2.08e-05	0.0157	1.36	9758	1319	857	157	[Ikzf1 - ikaros family zinc finger 1, Nr1h2 - nuclear receptor subfamily 1, group h, member 2, Zfp219 - zinc finger protein 219, Nphp1 - nephronophthisis 1 (juvenile) homolog (human), Abi1 - abl-interactor 1, Spag9 - sperm associated antigen 9, Ptk2 - ptk2 protein tyrosine kinase 2, Camk2b - calcium/calmodulin-dependent protein kinase ii, beta, Braf - braf transforming gene, Ptch1 - patched homol…
GO:0007275	multicellular organism development	3.36e-05	0.024	1.6	9758	512	857	72	[Phactr4 - phosphatase and actin regulator 4, Lsm14b - lsm14 homolog b (scd6, s. cerevisiae), Ikzf1 - ikaros family zinc finger 1, Nr1h2 - nuclear receptor subfamily 1, group h, member 2, Tle3 - transducin-like enhancer of split 3, homolog of drosophila e(spl), Ptk2 - ptk2 protein tyrosine kinase 2, Suco - sun domain containing ossification factor, Spata6 - spermatogenesis associated 6, Setdb2 - …
GO:0031345	negative regulation of cell projection organization	3.63e-05	0.0246	2.47	9758	106	857	23	[Il15ra - interleukin 15 receptor, alpha chain, Cib1 - calcium and integrin binding 1 (calmyrin), Gdi1 - guanosine diphosphate (gdp) dissociation inhibitor 1, Map4 - microtubule-associated protein 4, Stap1 - signal transducing adaptor family member 1, Ptk2 - ptk2 protein tyrosine kinase 2, Rtn4 - reticulon 4, Carm1 - coactivator-associated arginine methyltransferase 1, Cd38 - cd38 antigen, Ppp3ca…
GO:0051240	positive regulation of multicellular organismal process	4.07e-05	0.0262	1.44	9758	862	857	109	[Csnk1d - casein kinase 1, delta, Ikzf1 - ikaros family zinc finger 1, Gdi1 - guanosine diphosphate (gdp) dissociation inhibitor 1, Nr1h2 - nuclear receptor subfamily 1, group h, member 2, Ist1 - increased sodium tolerance 1 homolog (yeast), Zfp219 - zinc finger protein 219, Ptk2 - ptk2 protein tyrosine kinase 2, Spag9 - sperm associated antigen 9, Pkm - pyruvate kinase, muscle, Camk2b - calcium/…
GO:2000026	regulation of multicellular organismal development	4.34e-05	0.0267	1.41	9758	970	857	120	[Csnk1d - casein kinase 1, delta, Ikzf1 - ikaros family zinc finger 1, Gdi1 - guanosine diphosphate (gdp) dissociation inhibitor 1, Phf14 - phd finger protein 14, Ist1 - increased sodium tolerance 1 homolog (yeast), Zfp219 - zinc finger protein 219, Pdlim5 - pdz and lim domain 5, Spag9 - sperm associated antigen 9, Ptk2 - ptk2 protein tyrosine kinase 2, Pkm - pyruvate kinase, muscle, Camk2b - cal…
GO:0050794	regulation of cellular process	4.46e-05	0.0261	1.13	9758	4951	857	490	[Phactr4 - phosphatase and actin regulator 4, Csnk1d - casein kinase 1, delta, Ikzf1 - ikaros family zinc finger 1, Dennd1a - denn/madd domain containing 1a, Ist1 - increased sodium tolerance 1 homolog (yeast), Abi1 - abl-interactor 1, Mark3 - map/microtubule affinity-regulating kinase 3, Dis3l2 - dis3 mitotic control homolog (s. cerevisiae)-like 2, Ptbp1 - polypyrimidine tract binding protein 1,…
GO:0045595	regulation of cell differentiation	4.87e-05	0.0273	1.43	9758	885	857	111	[Csnk1d - casein kinase 1, delta, Ikzf1 - ikaros family zinc finger 1, Gdi1 - guanosine diphosphate (gdp) dissociation inhibitor 1, Ist1 - increased sodium tolerance 1 homolog (yeast), Zfp219 - zinc finger protein 219, Ptk2 - ptk2 protein tyrosine kinase 2, Pdlim5 - pdz and lim domain 5, Spag9 - sperm associated antigen 9, Camk2b - calcium/calmodulin-dependent protein kinase ii, beta, Carm1 - coa…
GO:0051179	localization	5.27e-05	0.0283	1.24	9758	2221	857	242	[Csnk1d - casein kinase 1, delta, Dennd1a - denn/madd domain containing 1a, Ikzf1 - ikaros family zinc finger 1, Ist1 - increased sodium tolerance 1 homolog (yeast), Dennd1b - denn/madd domain containing 1b, Ptk2 - ptk2 protein tyrosine kinase 2, Camk2b - calcium/calmodulin-dependent protein kinase ii, beta, Braf - braf transforming gene, Ptch1 - patched homolog 1, Dag1 - dystroglycan 1, Slc9a7 -…
GO:0010975	regulation of neuron projection development	6.34e-05	0.0327	1.79	9758	292	857	46	[Il15ra - interleukin 15 receptor, alpha chain, Gdi1 - guanosine diphosphate (gdp) dissociation inhibitor 1, Golga2 - golgi autoantigen, golgin subfamily a, 2, Ist1 - increased sodium tolerance 1 homolog (yeast), Sirt1 - sirtuin 1, Pdlim5 - pdz and lim domain 5, Ptk2 - ptk2 protein tyrosine kinase 2, Carm1 - coactivator-associated arginine methyltransferase 1, Camk2b - calcium/calmodulin-dependen…
GO:0010720	positive regulation of cell development	7.11e-05	0.0352	1.75	9758	319	857	49	[Csnk1d - casein kinase 1, delta, Gdi1 - guanosine diphosphate (gdp) dissociation inhibitor 1, Golga2 - golgi autoantigen, golgin subfamily a, 2, Ist1 - increased sodium tolerance 1 homolog (yeast), Spag9 - sperm associated antigen 9, Ptk2 - ptk2 protein tyrosine kinase 2, Camk2b - calcium/calmodulin-dependent protein kinase ii, beta, Spen - spen homolog, transcriptional regulator (drosophila), B…
GO:0120035	regulation of plasma membrane bounded cell projection organization	7.87e-05	0.0375	1.66	9758	399	857	58	[Il15ra - interleukin 15 receptor, alpha chain, Golga2 - golgi autoantigen, golgin subfamily a, 2, Gdi1 - guanosine diphosphate (gdp) dissociation inhibitor 1, Ist1 - increased sodium tolerance 1 homolog (yeast), Ptk2 - ptk2 protein tyrosine kinase 2, Pdlim5 - pdz and lim domain 5, Carm1 - coactivator-associated arginine methyltransferase 1, Camk2b - calcium/calmodulin-dependent protein kinase ii…
GO:0031344	regulation of cell projection organization	9.06e-05	0.0417	1.65	9758	401	857	58	[Il15ra - interleukin 15 receptor, alpha chain, Golga2 - golgi autoantigen, golgin subfamily a, 2, Gdi1 - guanosine diphosphate (gdp) dissociation inhibitor 1, Ist1 - increased sodium tolerance 1 homolog (yeast), Ptk2 - ptk2 protein tyrosine kinase 2, Pdlim5 - pdz and lim domain 5, Carm1 - coactivator-associated arginine methyltransferase 1, Camk2b - calcium/calmodulin-dependent protein kinase ii…
GO:0010769	regulation of cell morphogenesis involved in differentiation	0.000104	0.0462	2.03	9758	174	857	31	[Gdi1 - guanosine diphosphate (gdp) dissociation inhibitor 1, Golga2 - golgi autoantigen, golgin subfamily a, 2, Ist1 - increased sodium tolerance 1 homolog (yeast), Actn4 - actinin alpha 4, Pdlim5 - pdz and lim domain 5, Ptk2 - ptk2 protein tyrosine kinase 2, Camk2b - calcium/calmodulin-dependent protein kinase ii, beta, Srf - serum response factor, Braf - braf transforming gene, Cux1 - cut-like…
GO:0051239	regulation of multicellular organismal process	0.000118	0.0507	1.3	9758	1424	857	163	[Csnk1d - casein kinase 1, delta, Gdi1 - guanosine diphosphate (gdp) dissociation inhibitor 1, Ikzf1 - ikaros family zinc finger 1, Phf14 - phd finger protein 14, Nr1h2 - nuclear receptor subfamily 1, group h, member 2, Ist1 - increased sodium tolerance 1 homolog (yeast), Zfp219 - zinc finger protein 219, Spag9 - sperm associated antigen 9, Pdlim5 - pdz and lim domain 5, Ptk2 - ptk2 protein tyros…
GO:0050769	positive regulation of neurogenesis	0.000124	0.0516	1.77	9758	283	857	44	[Csnk1d - casein kinase 1, delta, Golga2 - golgi autoantigen, golgin subfamily a, 2, Gdi1 - guanosine diphosphate (gdp) dissociation inhibitor 1, Fubp1 - far upstream element (fuse) binding protein 1, Tcf4 - transcription factor 4, Ist1 - increased sodium tolerance 1 homolog (yeast), Sirt1 - sirtuin 1, Ptk2 - ptk2 protein tyrosine kinase 2, Spag9 - sperm associated antigen 9, Camk2b - calcium/cal…
GO:0051049	regulation of transport	0.000127	0.0512	1.4	9758	886	857	109	[Gdi1 - guanosine diphosphate (gdp) dissociation inhibitor 1, Nr1h2 - nuclear receptor subfamily 1, group h, member 2, Ptk2 - ptk2 protein tyrosine kinase 2, Smap1 - stromal membrane-associated protein 1, Rbm27 - rna binding motif protein 27, Braf - braf transforming gene, Ptbp1 - polypyrimidine tract binding protein 1, Ptch1 - patched homolog 1, Ceacam1 - carcinoembryonic antigen-related cell ad…
GO:0051962	positive regulation of nervous system development	0.000129	0.0503	1.75	9758	292	857	45	[Csnk1d - casein kinase 1, delta, Golga2 - golgi autoantigen, golgin subfamily a, 2, Gdi1 - guanosine diphosphate (gdp) dissociation inhibitor 1, Fubp1 - far upstream element (fuse) binding protein 1, Tcf4 - transcription factor 4, Ist1 - increased sodium tolerance 1 homolog (yeast), Sirt1 - sirtuin 1, Ptk2 - ptk2 protein tyrosine kinase 2, Spag9 - sperm associated antigen 9, Camk2b - calcium/cal…
GO:0045665	negative regulation of neuron differentiation	0.00013	0.0491	2.24	9758	122	857	24	[Il15ra - interleukin 15 receptor, alpha chain, Cib1 - calcium and integrin binding 1 (calmyrin), Gdi1 - guanosine diphosphate (gdp) dissociation inhibitor 1, Ptk2 - ptk2 protein tyrosine kinase 2, Rtn4 - reticulon 4, Carm1 - coactivator-associated arginine methyltransferase 1, Eif4enif1 - eukaryotic translation initiation factor 4e nuclear import factor 1, Cd38 - cd38 antigen, Ppp3ca - protein p…
GO:0010721	negative regulation of cell development	0.00016	0.0588	2.01	9758	170	857	30	[Il15ra - interleukin 15 receptor, alpha chain, Gdi1 - guanosine diphosphate (gdp) dissociation inhibitor 1, Actn4 - actinin alpha 4, Ptk2 - ptk2 protein tyrosine kinase 2, Carm1 - coactivator-associated arginine methyltransferase 1, Cd38 - cd38 antigen, Ptbp1 - polypyrimidine tract binding protein 1, Ptprs - protein tyrosine phosphatase, receptor type, s, Cdk5rap2 - cdk5 regulatory subunit assoc…
GO:0065007	biological regulation	0.000178	0.0638	1.1	9758	5514	857	534	[Phactr4 - phosphatase and actin regulator 4, Csnk1d - casein kinase 1, delta, Ikzf1 - ikaros family zinc finger 1, Dennd1a - denn/madd domain containing 1a, Ist1 - increased sodium tolerance 1 homolog (yeast), Abi1 - abl-interactor 1, Mark3 - map/microtubule affinity-regulating kinase 3, Dis3l2 - dis3 mitotic control homolog (s. cerevisiae)-like 2, Ptbp1 - polypyrimidine tract binding protein 1,…
GO:0060627	regulation of vesicle-mediated transport	0.000182	0.0635	1.72	9758	305	857	46	[Il15ra - interleukin 15 receptor, alpha chain, Stxbp5 - syntaxin binding protein 5 (tomosyn), Atxn2 - ataxin 2, Nr1h2 - nuclear receptor subfamily 1, group h, member 2, Actn4 - actinin alpha 4, Bet1l - blocked early in transport 1 homolog (s. cerevisiae)-like, Ptk2 - ptk2 protein tyrosine kinase 2, Smap1 - stromal membrane-associated protein 1, Braf - braf transforming gene, Ap2a1 - adaptor-rela…
GO:0051129	negative regulation of cellular component organization	0.00024	0.0815	1.56	9758	452	857	62	[Il15ra - interleukin 15 receptor, alpha chain, Gdi1 - guanosine diphosphate (gdp) dissociation inhibitor 1, Nr1h2 - nuclear receptor subfamily 1, group h, member 2, Atxn2 - ataxin 2, H2afy - h2a histone family, member y, Ptk2 - ptk2 protein tyrosine kinase 2, Carm1 - coactivator-associated arginine methyltransferase 1, Cd38 - cd38 antigen, Tnks2 - tankyrase, trf1-interacting ankyrin-related adp-…
GO:0050807	regulation of synapse organization	0.00025	0.0824	2.24	9758	112	857	22	[Gripap1 - grip1 associated protein 1, Pdlim5 - pdz and lim domain 5, Ptk2 - ptk2 protein tyrosine kinase 2, Picalm - phosphatidylinositol binding clathrin assembly protein, Mapk14 - mitogen-activated protein kinase 14, Numb - numb gene homolog (drosophila), Camk2b - calcium/calmodulin-dependent protein kinase ii, beta, Sept11 - septin 11, Arhgap33 - rho gtpase activating protein 33, Fyn - fyn pr…
GO:0050789	regulation of biological process	0.000274	0.0881	1.11	9758	5243	857	509	[Phactr4 - phosphatase and actin regulator 4, Csnk1d - casein kinase 1, delta, Ikzf1 - ikaros family zinc finger 1, Dennd1a - denn/madd domain containing 1a, Ist1 - increased sodium tolerance 1 homolog (yeast), Abi1 - abl-interactor 1, Mark3 - map/microtubule affinity-regulating kinase 3, Dis3l2 - dis3 mitotic control homolog (s. cerevisiae)-like 2, Ptbp1 - polypyrimidine tract binding protein 1,…
GO:0099590	neurotransmitter receptor internalization	0.000275	0.0864	9.11	9758	5	857	4	[Dnm2 - dynamin 2, Synj1 - synaptojanin 1, Ap2b1 - adaptor-related protein complex 2, beta 1 subunit, Ap2m1 - adaptor-related protein complex 2, mu 1 subunit]
GO:0098884	postsynaptic neurotransmitter receptor internalization	0.000275	0.0843	9.11	9758	5	857	4	[Dnm2 - dynamin 2, Ap2b1 - adaptor-related protein complex 2, beta 1 subunit, Synj1 - synaptojanin 1, Ap2m1 - adaptor-related protein complex 2, mu 1 subunit]
GO:0140239	postsynaptic endocytosis	0.000275	0.0824	9.11	9758	5	857	4	[Dnm2 - dynamin 2, Synj1 - synaptojanin 1, Ap2b1 - adaptor-related protein complex 2, beta 1 subunit, Ap2m1 - adaptor-related protein complex 2, mu 1 subunit]
GO:0007166	cell surface receptor signaling pathway	0.000285	0.0836	1.43	9758	719	857	90	[Il15ra - interleukin 15 receptor, alpha chain, Csnk1d - casein kinase 1, delta, Mknk1 - map kinase-interacting serine/threonine kinase 1, Lax1 - lymphocyte transmembrane adaptor 1, Cd247 - cd247 antigen, Tle3 - transducin-like enhancer of split 3, homolog of drosophila e(spl), Tlr4 - toll-like receptor 4, Dcp1a - dcp1 decapping enzyme homolog a (s. cerevisiae), Il18rap - interleukin 18 receptor …
GO:0032989	cellular component morphogenesis	0.000289	0.0826	1.79	9758	242	857	38	[Dock10 - dedicator of cytokinesis 10, Stxbp5 - syntaxin binding protein 5 (tomosyn), Atxn2 - ataxin 2, Pxn - paxillin, Abi1 - abl-interactor 1, Ptk2 - ptk2 protein tyrosine kinase 2, Creb1 - camp responsive element binding protein 1, Pank2 - pantothenate kinase 2, Camk2b - calcium/calmodulin-dependent protein kinase ii, beta, Add1 - adducin 1 (alpha), Scrib - scribbled homolog (drosophila), Thoc…
GO:0060966	regulation of gene silencing by RNA	0.000368	0.103	3.45	9758	33	857	10	[Fxr1 - fragile x mental retardation gene 1, autosomal homolog, Ncor1 - nuclear receptor co-repressor 1, Pum2 - pumilio 2 (drosophila), Adar - adenosine deaminase, rna-specific, Nfkb1 - nuclear factor of kappa light polypeptide gene enhancer in b cells 1, p105, Tnrc6c - trinucleotide repeat containing 6c, Pum1 - pumilio 1 (drosophila), Tert - telomerase reverse transcriptase, Fmr1 - fragile x men…
GO:0060147	regulation of posttranscriptional gene silencing	0.000368	0.101	3.45	9758	33	857	10	[Fxr1 - fragile x mental retardation gene 1, autosomal homolog, Ncor1 - nuclear receptor co-repressor 1, Pum2 - pumilio 2 (drosophila), Adar - adenosine deaminase, rna-specific, Nfkb1 - nuclear factor of kappa light polypeptide gene enhancer in b cells 1, p105, Tnrc6c - trinucleotide repeat containing 6c, Pum1 - pumilio 1 (drosophila), Tert - telomerase reverse transcriptase, Fmr1 - fragile x men…
GO:0044087	regulation of cellular component biogenesis	0.000414	0.111	1.47	9758	564	857	73	[Abi2 - abl-interactor 2, Ikzf1 - ikaros family zinc finger 1, Stxbp5 - syntaxin binding protein 5 (tomosyn), Nr1h2 - nuclear receptor subfamily 1, group h, member 2, Atxn2 - ataxin 2, Plekhg2 - pleckstrin homology domain containing, family g (with rhogef domain) member 2, Nphp1 - nephronophthisis 1 (juvenile) homolog (human), Tlr4 - toll-like receptor 4, Pdlim5 - pdz and lim domain 5, Ptk2 - ptk…
GO:0043981	histone H4-K5 acetylation	0.000451	0.119	5.26	9758	13	857	6	[Phf20 - phd finger protein 20, Meaf6 - myst/esa1-associated factor 6, Kansl3 - kat8 regulatory nsl complex subunit 3, Kansl2 - kat8 regulatory nsl complex subunit 2, Kat7 - k(lysine) acetyltransferase 7, Kansl1 - kat8 regulatory nsl complex subunit 1]
GO:0043982	histone H4-K8 acetylation	0.000451	0.116	5.26	9758	13	857	6	[Phf20 - phd finger protein 20, Meaf6 - myst/esa1-associated factor 6, Kansl3 - kat8 regulatory nsl complex subunit 3, Kansl2 - kat8 regulatory nsl complex subunit 2, Kat7 - k(lysine) acetyltransferase 7, Kansl1 - kat8 regulatory nsl complex subunit 1]
GO:0010771	negative regulation of cell morphogenesis involved in differentiation	0.000459	0.116	2.97	9758	46	857	12	[Fgf13 - fibroblast growth factor 13, Gdi1 - guanosine diphosphate (gdp) dissociation inhibitor 1, Ptprs - protein tyrosine phosphatase, receptor type, s, Ttc3 - tetratricopeptide repeat domain 3, Actn4 - actinin alpha 4, Tsc2 - tuberous sclerosis 2, Ptk2 - ptk2 protein tyrosine kinase 2, Ap1ar - adaptor-related protein complex 1 associated regulatory protein, Rapgef2 - rap guanine nucleotide exc…
GO:0050768	negative regulation of neurogenesis	0.000512	0.127	1.99	9758	149	857	26	[Il15ra - interleukin 15 receptor, alpha chain, Gdi1 - guanosine diphosphate (gdp) dissociation inhibitor 1, Ptk2 - ptk2 protein tyrosine kinase 2, Cd38 - cd38 antigen, Carm1 - coactivator-associated arginine methyltransferase 1, Ptbp1 - polypyrimidine tract binding protein 1, Ptprs - protein tyrosine phosphatase, receptor type, s, Ttc3 - tetratricopeptide repeat domain 3, Cdk5rap2 - cdk5 regulat…
GO:0032879	regulation of localization	0.000543	0.132	1.28	9758	1355	857	152	[Gdi1 - guanosine diphosphate (gdp) dissociation inhibitor 1, Nr1h2 - nuclear receptor subfamily 1, group h, member 2, Spag9 - sperm associated antigen 9, Ptk2 - ptk2 protein tyrosine kinase 2, Camk2b - calcium/calmodulin-dependent protein kinase ii, beta, Smap1 - stromal membrane-associated protein 1, Rbm27 - rna binding motif protein 27, Braf - braf transforming gene, Ptbp1 - polypyrimidine tra…
GO:0001959	regulation of cytokine-mediated signaling pathway	0.000565	0.135	2.55	9758	67	857	15	[Sigirr - single immunoglobulin and toll-interleukin 1 receptor (tir) domain, Rffl - ring finger and fyve like domain containing protein, Ptprc - protein tyrosine phosphatase, receptor type, c, Stap1 - signal transducing adaptor family member 1, Cyld - cylindromatosis (turban tumor syndrome), Cd74 - cd74 antigen (invariant polypeptide of major histocompatibility complex, class ii antigen-associat…
GO:0032990	cell part morphogenesis	0.000568	0.133	2	9758	142	857	25	[Dock10 - dedicator of cytokinesis 10, Stxbp5 - syntaxin binding protein 5 (tomosyn), Atxn2 - ataxin 2, Abi1 - abl-interactor 1, Ptk2 - ptk2 protein tyrosine kinase 2, Pank2 - pantothenate kinase 2, Creb1 - camp responsive element binding protein 1, Camk2b - calcium/calmodulin-dependent protein kinase ii, beta, App - amyloid beta (a4) precursor protein, Map4k4 - mitogen-activated protein kinase k…
GO:0033043	regulation of organelle organization	0.000573	0.132	1.37	9758	842	857	101	[Abi2 - abl-interactor 2, Plekhg2 - pleckstrin homology domain containing, family g (with rhogef domain) member 2, Camk2b - calcium/calmodulin-dependent protein kinase ii, beta, Tnks2 - tankyrase, trf1-interacting ankyrin-related adp-ribose polymerase 2, Braf - braf transforming gene, Ptbp1 - polypyrimidine tract binding protein 1, Rtel1 - regulator of telomere elongation helicase 1, Setd5 - set …
GO:0018394	peptidyl-lysine acetylation	0.000618	0.14	2.3	9758	89	857	18	[Atat1 - alpha tubulin acetyltransferase 1, Phf20 - phd finger protein 20, Morf4l2 - mortality factor 4 like 2, Meaf6 - myst/esa1-associated factor 6, Ep400 - e1a binding protein p400, Kansl2 - kat8 regulatory nsl complex subunit 2, Kansl3 - kat8 regulatory nsl complex subunit 3, Sirt1 - sirtuin 1, Crtc2 - creb regulated transcription coactivator 2, Brd8 - bromodomain containing 8, Taf1 - taf1 rn…
GO:0032483	regulation of Rab protein signal transduction	0.000675	0.15	11.39	9758	3	857	3	[Dennd1a - denn/madd domain containing 1a, Madd - map-kinase activating death domain, Dennd4b - denn/madd domain containing 4b]
GO:0060759	regulation of response to cytokine stimulus	0.000771	0.168	2.4	9758	76	857	16	[Sigirr - single immunoglobulin and toll-interleukin 1 receptor (tir) domain, Rffl - ring finger and fyve like domain containing protein, Ptprc - protein tyrosine phosphatase, receptor type, c, Tlr4 - toll-like receptor 4, Stap1 - signal transducing adaptor family member 1, Cyld - cylindromatosis (turban tumor syndrome), Cd74 - cd74 antigen (invariant polypeptide of major histocompatibility compl…
GO:0140238	presynaptic endocytosis	0.000772	0.166	4.19	9758	19	857	7	[Dennd1a - denn/madd domain containing 1a, Scrib - scribbled homolog (drosophila), Dnm2 - dynamin 2, Bin1 - bridging integrator 1, Picalm - phosphatidylinositol binding clathrin assembly protein, Synj1 - synaptojanin 1, Ap2m1 - adaptor-related protein complex 2, mu 1 subunit]
GO:0048488	synaptic vesicle endocytosis	0.000772	0.163	4.19	9758	19	857	7	[Dennd1a - denn/madd domain containing 1a, Scrib - scribbled homolog (drosophila), Dnm2 - dynamin 2, Bin1 - bridging integrator 1, Picalm - phosphatidylinositol binding clathrin assembly protein, Synj1 - synaptojanin 1, Ap2m1 - adaptor-related protein complex 2, mu 1 subunit]
GO:0030030	cell projection organization	0.000793	0.165	1.49	9758	482	857	63	[Dock10 - dedicator of cytokinesis 10, Abi2 - abl-interactor 2, Csnk1d - casein kinase 1, delta, Stxbp5 - syntaxin binding protein 5 (tomosyn), Atxn2 - ataxin 2, Nphp1 - nephronophthisis 1 (juvenile) homolog (human), Abi1 - abl-interactor 1, Ptk2 - ptk2 protein tyrosine kinase 2, Creb1 - camp responsive element binding protein 1, Gpm6b - glycoprotein m6b, Camk2b - calcium/calmodulin-dependent pro…
GO:0045666	positive regulation of neuron differentiation	0.000858	0.176	1.75	9758	221	857	34	[Csnk1d - casein kinase 1, delta, Golga2 - golgi autoantigen, golgin subfamily a, 2, Gdi1 - guanosine diphosphate (gdp) dissociation inhibitor 1, Tcf4 - transcription factor 4, Ist1 - increased sodium tolerance 1 homolog (yeast), Sirt1 - sirtuin 1, Spag9 - sperm associated antigen 9, Camk2b - calcium/calmodulin-dependent protein kinase ii, beta, Srf - serum response factor, Braf - braf transformi…
GO_FUNCTION
GO Term	Description	P-value	FDR q-value	Enrichment	N	B	n	b	Genes
GO:0051020	GTPase binding	8.33e-06	0.0312	1.78	9758	370	857	58	[Abi2 - abl-interactor 2, Dock10 - dedicator of cytokinesis 10, Dennd1a - denn/madd domain containing 1a, Gdi1 - guanosine diphosphate (gdp) dissociation inhibitor 1, Stxbp5 - syntaxin binding protein 5 (tomosyn), Plekhg2 - pleckstrin homology domain containing, family g (with rhogef domain) member 2, Dennd1b - denn/madd domain containing 1b, Fgd2 - fyve, rhogef and ph domain containing 2, Arfgef…
GO:0017016	Ras GTPase binding	3.76e-05	0.0702	1.83	9758	286	857	46	[Dock10 - dedicator of cytokinesis 10, Abi2 - abl-interactor 2, Dennd1a - denn/madd domain containing 1a, Gdi1 - guanosine diphosphate (gdp) dissociation inhibitor 1, Dennd4b - denn/madd domain containing 4b, Stxbp5 - syntaxin binding protein 5 (tomosyn), Plekhg2 - pleckstrin homology domain containing, family g (with rhogef domain) member 2, Arhgef1 - rho guanine nucleotide exchange factor (gef)…
GO:0031267	small GTPase binding	4.71e-05	0.0587	1.8	9758	297	857	47	[Dock10 - dedicator of cytokinesis 10, Abi2 - abl-interactor 2, Dennd1a - denn/madd domain containing 1a, Gdi1 - guanosine diphosphate (gdp) dissociation inhibitor 1, Dennd4b - denn/madd domain containing 4b, Stxbp5 - syntaxin binding protein 5 (tomosyn), Plekhg2 - pleckstrin homology domain containing, family g (with rhogef domain) member 2, Arhgef1 - rho guanine nucleotide exchange factor (gef)…
GO:0008092	cytoskeletal protein binding	0.000344	0.322	1.52	9758	495	857	66	[Phactr4 - phosphatase and actin regulator 4, Golga2 - golgi autoantigen, golgin subfamily a, 2, Cep57l1 - centrosomal protein 57-like 1, Agbl5 - atp/gtp binding protein-like 5, Dcp1a - dcp1 decapping enzyme homolog a (s. cerevisiae), Rcsd1 - rcsd domain containing 1, Spag9 - sperm associated antigen 9, Pdlim5 - pdz and lim domain 5, Ptk2 - ptk2 protein tyrosine kinase 2, Svil - supervillin, Arfg…
GO:0005085	guanyl-nucleotide exchange factor activity	0.000568	0.425	2	9758	142	857	25	[Dock10 - dedicator of cytokinesis 10, Ric8b - resistance to inhibitors of cholinesterase 8 homolog b (c. elegans), Dennd1a - denn/madd domain containing 1a, Dennd4b - denn/madd domain containing 4b, Plekhg2 - pleckstrin homology domain containing, family g (with rhogef domain) member 2, Arhgef1 - rho guanine nucleotide exchange factor (gef) 1, Fgd2 - fyve, rhogef and ph domain containing 2, Denn…
