# Supplementary material for: Polypyrimidine tract-binding proteins are essential for B cell development
Source: eLife. 2020 Feb 21;9:e53557. doi: 10.7554/eLife.53557 (PMC7058386; doi:10.7554/eLife.53557)
Supplement: Figure 8—source data 1. [file elife-53557-fig8-data1.xls]

## Sheet: Fig4b_P1sKOvsCtr
Row.names	baseMean	log2FoldChange	lfcSE	pvalue	padj	GeneName	cc_Phase
ENSMUSG00000026187	1684.6	-0.758359	0.10534	2.95898e-14	1.85655e-11	Xrcc5	S
ENSMUSG00000001525	67884.2	0.537338	0.0792835	8.74872e-13	5.01188e-10	Tubb5	S
ENSMUSG00000031575	7782.51	-0.298256	0.0522522	1.54861e-09	5.36962e-07	Ash2l	S
ENSMUSG00000041298	622.584	0.85621	0.158838	3.78131e-09	1.1383e-06	Katnal1	S
ENSMUSG00000052369	1828.48	-0.49217	0.105406	2.06186e-07	3.72151e-05	Tmem106c	S
ENSMUSG00000062510	3192.23	-0.321159	0.0685697	3.29419e-07	5.4942e-05	Nsl1	S
ENSMUSG00000025747	12754.4	-0.337459	0.0781875	1.87594e-06	0.000230837	Tyms	S
ENSMUSG00000022177	5985.79	-0.336689	0.0833599	6.2771e-06	0.000626569	Haus4	S
ENSMUSG00000006763	1804.82	-0.393628	0.125677	0.000132654	0.00688128	Saal1	S
ENSMUSG00000045273	2663.46	-0.372771	0.125763	0.000225576	0.0105024	Cenph	S
ENSMUSG00000018666	6115.74	-0.259641	0.0826706	0.000261389	0.0118723	Cbx1	S
ENSMUSG00000068114	1756.94	0.334805	0.111802	0.000263109	0.0118723	Ccdc134	S
ENSMUSG00000026196	636.976	0.47846	0.168665	0.000265891	0.0119569	Bard1	S
ENSMUSG00000029863	6514.46	-0.318235	0.112714	0.000437257	0.016748	Casp2	S
ENSMUSG00000018189	11319.4	-0.286059	0.108971	0.000871824	0.0265292	Uchl5	S
ENSMUSG00000001151	1622.71	0.349488	0.149211	0.00145738	0.0362434	Pcnt	S
ENSMUSG00000021537	6608.21	-0.261566	0.11216	0.00230432	0.049893	Cetn3	S
ENSMUSG00000034206	619.934	0.498554	0.264666	0.00236639	0.0502086	Polq	S
ENSMUSG00000025436	939.897	-0.289087	0.143174	0.00403134	0.0690727	Atp23	S
ENSMUSG00000024800	4039.67	-0.208392	0.0918174	0.00513906	0.081385	Rpp30	S
ENSMUSG00000038544	6729.5	0.129916	0.0505045	0.00532452	0.0833205	Inip	S
ENSMUSG00000062075	6946.6	0.183899	0.0813645	0.00588583	0.0876291	Lmnb2	S
ENSMUSG00000039994	5046.56	0.16606	0.0737895	0.00795545	0.103374	Timeless	S
ENSMUSG00000002319	920.653	-0.255257	0.143213	0.00811904	0.104475	Ipo4	S
ENSMUSG00000005732	13617.6	-0.207259	0.103958	0.00844472	0.107	Ranbp1	S
ENSMUSG00000020652	2876.6	0.170678	0.079025	0.00881011	0.108997	Cenpo	S
ENSMUSG00000001416	36013	-0.166766	0.0802873	0.00889209	0.109395	Cct3	S
ENSMUSG00000023909	157.401	0.362762	0.335704	0.0093793	0.112224	Paqr4	S
ENSMUSG00000017499	9541.95	0.175446	0.0837677	0.00954223	0.11284	Cdc6	S
ENSMUSG00000038628	6514.66	-0.226983	0.120707	0.00954893	0.11284	Polr3k	S
ENSMUSG00000026245	10776.5	-0.165047	0.0808378	0.010949	0.121947	Farsb	S
ENSMUSG00000021572	2468.77	0.174209	0.0865946	0.0117886	0.127109	Cep72	S
ENSMUSG00000030393	923.084	0.263991	0.183834	0.0126733	0.131933	Zik1	S
ENSMUSG00000041238	4059.72	-0.133833	0.0609633	0.0130672	0.134405	Rbbp8	S
ENSMUSG00000033364	2482.93	0.201968	0.11208	0.0131718	0.135221	Usp37	S
ENSMUSG00000031629	489.962	-0.23851	0.154835	0.0138564	0.139152	Cenpu	S
ENSMUSG00000068394	1206.12	0.26698	0.229093	0.0155461	0.148765	Cep152	S
ENSMUSG00000032249	1863.66	-0.251358	0.230265	0.0181403	0.161487	Anp32a	S
ENSMUSG00000026669	5729.67	0.123082	0.0614148	0.0208416	0.174244	Mcm10	S
ENSMUSG00000007739	25643	-0.150788	0.0853219	0.0213023	0.175864	Cct4	S
ENSMUSG00000021175	5817.5	-0.148435	0.0851914	0.0254276	0.192147	Cdca7l	S
ENSMUSG00000038126	1122.53	0.207163	0.159467	0.0261949	0.195438	Mphosph9	S
ENSMUSG00000027454	3025.81	-0.148578	0.0857788	0.0277457	0.201399	Gins1	S
ENSMUSG00000026036	1848.5	-0.205029	0.168747	0.0285903	0.204843	Nif3l1	S
ENSMUSG00000061607	522.65	0.19677	0.248945	0.0300599	0.209684	Mdc1	S
ENSMUSG00000022863	798.907	-0.176114	0.122841	0.0306794	0.211197	Btg3	S
ENSMUSG00000078762	377.636	-0.187833	0.146584	0.0312526	0.213028	Haus5	S
ENSMUSG00000002835	6310.51	0.122749	0.0701939	0.0363011	0.229762	Chaf1a	S
ENSMUSG00000025066	8848.53	-0.147438	0.0958198	0.0363232	0.229762	Sfr1	S
ENSMUSG00000046179	3428.87	0.150023	0.0907385	0.0369542	0.232082	E2f8	S
ENSMUSG00000007646	1155	0.138924	0.0858708	0.0383118	0.236421	Rad51c	S
ENSMUSG00000033054	2624.59	0.157408	0.112208	0.0398593	0.240572	Npat	S
ENSMUSG00000056919	733.406	0.166772	0.12591	0.0397878	0.240572	Cep162	S
ENSMUSG00000000751	20724.2	0.123514	0.0757184	0.0411306	0.244556	Rpa1	S
ENSMUSG00000012483	4465.71	-0.162404	0.126299	0.0431454	0.25028	Rpa3	S
ENSMUSG00000043091	10718.3	-0.11482	0.0667225	0.0445515	0.254447	Tuba1c	S
ENSMUSG00000029363	11264.3	-0.127658	0.0823261	0.0464392	0.259163	Rfc5	S
ENSMUSG00000004099	28911.2	0.147237	0.104329	0.046898	0.26029	Dnmt1	S
ENSMUSG00000027650	2870.49	0.145936	0.104439	0.0475682	0.261804	Tti1	S
ENSMUSG00000034773	1515.5	0.133672	0.0917844	0.0513422	0.273548	BC030867	S
ENSMUSG00000019373	8292.06	-0.137336	0.0970921	0.0525393	0.276883	Cops3	S
ENSMUSG00000017550	2792.47	0.132186	0.0915278	0.0551231	0.283742	Atad5	S
ENSMUSG00000031065	3570.29	0.134994	0.0983921	0.0603607	0.295591	Cdk16	S
ENSMUSG00000057406	8948.79	0.139627	0.109349	0.0619185	0.299271	Nsd2	S
ENSMUSG00000030254	5529.57	-0.115384	0.0768227	0.0625382	0.300849	Rad18	S
ENSMUSG00000047242	652.978	0.149651	0.137457	0.0627218	0.301065	Taf9b	S
ENSMUSG00000074780	24.7299	-0.07357	0.147136	0.0628842	0.301296	Anapc15-ps	S
ENSMUSG00000031971	943.451	0.141429	0.116973	0.0641009	0.304578	Ccsap	S
ENSMUSG00000032264	5092.1	0.111588	0.076614	0.069746	0.319872	Zw10	S
ENSMUSG00000032397	18844.1	-0.136764	0.116603	0.0700498	0.320589	Tipin	S
ENSMUSG00000033970	7661.03	-0.129455	0.108942	0.0740613	0.330056	Rfc3	S
ENSMUSG00000055884	849.898	0.138143	0.144556	0.0747752	0.33173	Fancm	S
ENSMUSG00000024590	27369.1	0.137491	0.128246	0.074979	0.33241	Lmnb1	S
ENSMUSG00000051220	5852.59	0.111788	0.0783554	0.0752765	0.333028	Ercc6l	S
ENSMUSG00000037103	1844.02	0.129374	0.106884	0.0759313	0.334717	Dcaf15	S
ENSMUSG00000044934	3875.17	0.13675	0.127793	0.0796814	0.341439	Zfp367	S
ENSMUSG00000022471	19919.1	-0.0893816	0.0576108	0.0799344	0.341632	Xrcc6	S
ENSMUSG00000038482	28053	0.100458	0.0706156	0.0829914	0.346921	Tfdp1	S
ENSMUSG00000028033	318.36	0.112902	0.155529	0.0955224	0.37303	Kcnq5	S
ENSMUSG00000026374	8441.09	-0.0807349	0.0602833	0.0958027	0.373571	Tsn	S
ENSMUSG00000042462	3938.37	-0.119116	0.106042	0.0973789	0.377705	Dctpp1	S
ENSMUSG00000029247	35281.1	-0.115984	0.105024	0.101241	0.385646	Paics	S
ENSMUSG00000001228	40932.2	0.10466	0.0813476	0.103234	0.389858	Uhrf1	S
ENSMUSG00000031922	5994.86	-0.118233	0.106468	0.105227	0.393214	Cep57	S
ENSMUSG00000029676	3737.48	-0.096153	0.0725415	0.105736	0.393776	Pot1a	S
ENSMUSG00000054309	9463.36	-0.0942395	0.0694761	0.105591	0.393776	Cpsf3	S
ENSMUSG00000027959	1200.11	-0.117185	0.123398	0.109195	0.399726	Sass6	S
ENSMUSG00000027067	37726.3	-0.0754155	0.0568197	0.11147	0.402989	Ssrp1	S
ENSMUSG00000022422	2178.69	-0.113027	0.10725	0.112156	0.403558	Dscc1	S
ENSMUSG00000033405	419.959	-0.111494	0.141716	0.11232	0.40391	Nudt15	S
ENSMUSG00000028693	10493.8	-0.0924985	0.0708501	0.112975	0.40494	Nasp	S
ENSMUSG00000055660	1687.92	0.108425	0.09579	0.114667	0.407007	Mettl4	S
ENSMUSG00000032586	3672.69	0.0832409	0.0605148	0.116533	0.409777	Traip	S
ENSMUSG00000049539	371.995	-0.102216	0.144072	0.12085	0.415833	Hist1h1a	S
ENSMUSG00000020649	75909.6	0.101669	0.0952538	0.121582	0.417274	Rrm2	S
ENSMUSG00000021714	4633.82	-0.107887	0.1365	0.123854	0.421373	Cenpk	S
ENSMUSG00000023942	9207.02	-0.101092	0.0817776	0.12434	0.422134	Slc29a1	S
ENSMUSG00000038644	26203.5	0.100661	0.0808079	0.124477	0.422272	Pold1	S
ENSMUSG00000036875	4843.17	0.089884	0.0716351	0.124917	0.422676	Dna2	S
ENSMUSG00000044783	14068.6	0.102605	0.0963213	0.1257	0.424213	Hjurp	S
ENSMUSG00000017146	3134.68	0.108047	0.119526	0.128026	0.42825	Brca1	S
ENSMUSG00000034024	15079.2	-0.0877119	0.0712479	0.132639	0.435173	Cct2	S
ENSMUSG00000033904	1969.17	0.10456	0.128298	0.136252	0.44131	Ccp110	S
ENSMUSG00000061286	3021.77	-0.0964849	0.0857388	0.139627	0.445574	Exosc5	S
ENSMUSG00000023953	1276.19	0.105033	0.117815	0.139805	0.445589	Polh	S
ENSMUSG00000019952	2601.02	-0.10266	0.0973801	0.141073	0.447526	Poc1b	S
ENSMUSG00000020974	2041.85	-0.108653	0.0998503	0.142519	0.449684	Pole2	S
ENSMUSG00000026709	5557.54	-0.0876662	0.074707	0.145001	0.453484	Dars2	S
ENSMUSG00000022369	1874.88	-0.0999307	0.0984327	0.145139	0.453592	Mtbp	S
ENSMUSG00000028282	3961.31	0.101278	0.108075	0.14741	0.457868	Casp8ap2	S
ENSMUSG00000052926	4162.97	-0.0828745	0.0691113	0.148239	0.458874	Rnaseh2a	S
ENSMUSG00000029430	74956	-0.0904728	0.0812905	0.150346	0.461655	Ran	S
ENSMUSG00000042079	43323.5	-0.088903	0.0875245	0.155543	0.470378	Hnrnpf	S
ENSMUSG00000026134	5927.25	-0.092325	0.0871332	0.155702	0.470534	Prim2	S
ENSMUSG00000006715	8675.4	-0.0885338	0.0849904	0.166169	0.487626	Gmnn	S
ENSMUSG00000027353	2621.47	0.0878937	0.0833008	0.167619	0.490194	Mcm8	S
ENSMUSG00000044678	98.2316	0.0519891	0.130312	0.169869	0.495175	Ly6k	S
ENSMUSG00000032498	3551.8	-0.0811452	0.082641	0.171468	0.496999	Mlh1	S
ENSMUSG00000040331	18201.3	-0.0899757	0.0887377	0.176095	0.50332	Nsmce4a	S
ENSMUSG00000024742	59.1624	0.0557344	0.130228	0.176644	0.503997	Fen1	S
ENSMUSG00000045751	3831.85	-0.088285	0.0902623	0.177686	0.505985	Mms22l	S
ENSMUSG00000020794	7905.54	-0.093555	0.105715	0.179308	0.507716	Ube2g1	S
ENSMUSG00000028453	2097.48	0.0813235	0.076207	0.179776	0.508202	Fancg	S
ENSMUSG00000002870	35087.1	0.0701894	0.0620576	0.183729	0.513122	Mcm2	S
ENSMUSG00000037474	12394.6	0.0863727	0.0975677	0.184144	0.513122	Dtl	S
ENSMUSG00000021461	1138.06	-0.0819132	0.0798866	0.18965	0.519722	Fancc	S
ENSMUSG00000026646	1055.07	0.0874451	0.100872	0.195639	0.526423	Suv39h2	S
ENSMUSG00000002748	5656.53	0.0880147	0.105151	0.196256	0.527344	Baz1b	S
ENSMUSG00000040520	901.235	-0.0726884	0.130256	0.198532	0.529217	Manea	S
ENSMUSG00000075470	369.439	0.0749936	0.128984	0.200967	0.532946	Alg10b	S
ENSMUSG00000007080	4822.82	0.0946118	0.117809	0.2042	0.537784	Pole	S
ENSMUSG00000027285	2850.17	-0.0831847	0.0903497	0.204115	0.537784	Haus2	S
ENSMUSG00000021177	5224.73	-0.0696739	0.0678198	0.21634	0.552596	Tdp1	S
ENSMUSG00000022234	43830.5	-0.075725	0.080006	0.226955	0.564432	Cct5	S
ENSMUSG00000026496	38479.2	0.0620122	0.0633868	0.228964	0.56601	Parp1	S
ENSMUSG00000021485	3568.88	0.0760781	0.0834219	0.229269	0.566291	Mxd3	S
ENSMUSG00000050410	6824.43	0.0797771	0.0940719	0.2332	0.570478	Tcf19	S
ENSMUSG00000069308	33.7906	-0.0398683	0.124997	0.237301	0.574452	Hist1h2bp	S
ENSMUSG00000039509	7015.77	0.0544927	0.0515711	0.238712	0.57655	Nup133	S
ENSMUSG00000021707	5206.86	-0.0763188	0.0871485	0.23897	0.576794	Dhfr	S
ENSMUSG00000004018	1415.33	-0.0751715	0.0869099	0.239624	0.577201	Fancl	S
ENSMUSG00000022673	29813.5	0.0688119	0.0727114	0.241509	0.579136	Mcm4	S
ENSMUSG00000060639	410.849	-0.077069	0.0997248	0.245453	0.58402	Hist1h4i	S
ENSMUSG00000028896	11393.4	-0.0599658	0.060484	0.25204	0.590694	Rcc1	S
ENSMUSG00000014074	2760.21	0.0752706	0.106028	0.254362	0.593706	Rnf168	S
ENSMUSG00000023066	851.749	0.0647663	0.123834	0.256345	0.5961	Rttn	S
ENSMUSG00000031691	1097.07	0.0724816	0.111554	0.261213	0.599446	Tnpo2	S
ENSMUSG00000037846	1016.49	0.0711477	0.0903278	0.269521	0.607935	Rtkn2	S
ENSMUSG00000027845	921.826	0.0723683	0.0969812	0.272684	0.611242	Dclre1b	S
ENSMUSG00000040034	2795.94	-0.0750722	0.0936213	0.272659	0.611242	Nup43	S
ENSMUSG00000024817	5553.34	-0.0686867	0.0878794	0.277722	0.615451	Uhrf2	S
ENSMUSG00000031669	2286.46	0.0708335	0.0981316	0.281841	0.618819	Gins3	S
ENSMUSG00000017861	8476.72	0.0661247	0.0672962	0.283175	0.619753	Mybl2	S
ENSMUSG00000002068	4364.73	0.0635071	0.0773383	0.286372	0.62275	Ccne1	S
ENSMUSG00000032555	8487.69	0.0743914	0.0976731	0.287982	0.62371	Topbp1	S
ENSMUSG00000027203	12305.8	-0.0587291	0.0648546	0.288618	0.624233	Dut	S
ENSMUSG00000041491	2845.52	-0.0622079	0.0730756	0.290497	0.626289	Cep78	S
ENSMUSG00000043872	1253.78	0.068567	0.0933225	0.291262	0.626661	Zmym1	S
ENSMUSG00000018809	1371.13	0.0632941	0.0800497	0.300934	0.634832	Smyd4	S
ENSMUSG00000008690	16075.4	-0.0566757	0.0697119	0.311728	0.644007	Ncaph2	S
ENSMUSG00000037461	8184.26	0.0639254	0.0870159	0.314773	0.64704	Ints7	S
ENSMUSG00000052533	3343.75	0.0653246	0.100579	0.318062	0.649131	Nup188	S
ENSMUSG00000027811	4050.17	-0.0620695	0.0868889	0.32058	0.651243	4930579G24Rik	S
ENSMUSG00000020697	2032.96	0.0643231	0.104265	0.328004	0.659009	Lig3	S
ENSMUSG00000025872	6170.49	-0.0586155	0.0771145	0.332422	0.66328	Thoc3	S
ENSMUSG00000029466	3859.82	-0.0562905	0.0726037	0.336312	0.667055	Anapc7	S
ENSMUSG00000027823	11363.7	-0.0578673	0.0773505	0.338111	0.668466	Gmps	S
ENSMUSG00000041859	43191.6	0.0528154	0.067298	0.337947	0.668466	Mcm3	S
ENSMUSG00000025646	1327.64	0.059453	0.0843663	0.34023	0.669793	Atrip	S
ENSMUSG00000025742	9600.59	-0.0568228	0.0894237	0.34541	0.673902	Prps2	S
ENSMUSG00000024833	9943	0.0563381	0.0727943	0.349372	0.677656	Pola2	S
ENSMUSG00000039048	3694.06	-0.0503552	0.0606726	0.351897	0.679355	Foxred1	S
ENSMUSG00000031546	4593.36	-0.0521357	0.0809548	0.353846	0.680962	Gins4	S
ENSMUSG00000032477	4120.05	0.0536988	0.0707681	0.35468	0.681829	Cdc25a	S
ENSMUSG00000028438	933.486	0.0584526	0.105152	0.358258	0.684899	Kif24	S
ENSMUSG00000035024	8993.42	0.0581779	0.088289	0.359485	0.686261	Ncapd3	S
ENSMUSG00000027018	14128.1	-0.0578057	0.0893556	0.359972	0.686494	Hat1	S
ENSMUSG00000003868	11248.1	-0.057935	0.0914963	0.362458	0.689009	Ruvbl2	S
ENSMUSG00000042029	8888.31	0.0506255	0.11333	0.362802	0.689109	Ncapg2	S
ENSMUSG00000020171	2824.31	-0.0536158	0.0755082	0.364965	0.690718	Yeats4	S
ENSMUSG00000027323	10911.9	-0.0545382	0.0818967	0.368319	0.693969	Rad51	S
ENSMUSG00000099517	54.0885	-0.0330036	0.120958	0.373977	0.69853	Hist1h3g	S
ENSMUSG00000029790	1455.11	-0.0516674	0.0719164	0.375696	0.698585	Cep41	S
ENSMUSG00000005370	10758.9	0.0775781	0.0959476	0.3815	0.702438	Msh6	S
ENSMUSG00000028629	1690.96	-0.0536718	0.0861112	0.383714	0.704937	Exo5	S
ENSMUSG00000028484	11898.4	-0.0562276	0.0834309	0.384297	0.705518	Psip1	S
ENSMUSG00000030322	1952.9	0.0518351	0.0847319	0.385874	0.706739	Mbd4	S
ENSMUSG00000046591	1546.85	0.0543823	0.101881	0.3879	0.707841	Ticrr	S
ENSMUSG00000052565	538.536	-0.0487144	0.112034	0.388264	0.708162	Hist1h1d	S
ENSMUSG00000020392	10537	-0.0496276	0.0721326	0.388822	0.708422	Cdkn2aipnl	S
ENSMUSG00000041712	5389.04	0.0492099	0.0753364	0.391099	0.709797	Ubr7	S
ENSMUSG00000025001	9354.77	-0.0562122	0.0972929	0.391797	0.710281	Hells	S
ENSMUSG00000024054	5474.21	0.0499396	0.109281	0.393346	0.711718	Smchd1	S
ENSMUSG00000051329	6719.47	-0.0524923	0.106465	0.399221	0.717042	Nup160	S
ENSMUSG00000024791	7725.2	0.0484559	0.0706819	0.402003	0.718407	Cdca5	S
ENSMUSG00000028018	361.549	0.0481922	0.109898	0.406235	0.721758	Gstcd	S
ENSMUSG00000046111	971.515	0.0510611	0.102882	0.407983	0.722798	Cep295	S
ENSMUSG00000016757	2742.83	0.050599	0.082849	0.410236	0.724751	Ttll12	S
ENSMUSG00000025574	7970.97	-0.0495205	0.0803445	0.415905	0.728889	Tk1	S
ENSMUSG00000048170	11443.6	-0.0403709	0.0557169	0.415996	0.728889	Mcmbp	S
ENSMUSG00000028884	15291.2	0.0495372	0.084931	0.417277	0.72986	Rpa2	S
ENSMUSG00000007050	4466.54	-0.0428785	0.0637313	0.427991	0.737631	Lsm2	S
ENSMUSG00000042699	3014.68	0.0443071	0.101189	0.435654	0.743896	Dhx9	S
ENSMUSG00000028560	16030.1	0.0444098	0.0726083	0.445757	0.750971	Usp1	S
ENSMUSG00000022960	2441.35	-0.0486766	0.0904717	0.446276	0.75139	Donson	S
ENSMUSG00000055612	31669.4	-0.042607	0.0676939	0.449135	0.754052	Cdca7	S
ENSMUSG00000035198	6364.56	-0.0409747	0.0836098	0.458009	0.760551	Tubg1	S
ENSMUSG00000029687	17036.5	0.0417432	0.0685916	0.458623	0.76088	Ezh2	S
ENSMUSG00000047757	1512.36	-0.049878	0.102564	0.460942	0.762958	Fancb	S
ENSMUSG00000028212	8410.6	0.0498971	0.10441	0.461259	0.763191	Ccne2	S
ENSMUSG00000020527	285.135	-0.0377604	0.114161	0.462579	0.764543	Myo19	S
ENSMUSG00000028333	30629.5	-0.040212	0.0698898	0.466259	0.766453	Anp32b	S
ENSMUSG00000059119	16761.9	0.0366095	0.0567729	0.466127	0.766453	Nap1l4	S
ENSMUSG00000027342	43767.2	-0.0414646	0.082822	0.469615	0.768765	Pcna	S
ENSMUSG00000028587	1332.8	-0.0441338	0.084842	0.471203	0.769625	Orc1	S
ENSMUSG00000042590	6532.9	-0.0449133	0.0937752	0.471452	0.769782	Ipo11	S
ENSMUSG00000022881	9582.9	-0.0423936	0.0808237	0.47393	0.771879	Rfc4	S
ENSMUSG00000035842	2364.1	-0.0431151	0.0763983	0.474854	0.772542	Ddx11	S
ENSMUSG00000071078	45.0527	-0.0300625	0.117015	0.480204	0.77503	Nr2c2ap	S
ENSMUSG00000034329	4142.27	0.0433814	0.0856945	0.481385	0.775773	Brip1	S
ENSMUSG00000023104	14430.2	-0.0410253	0.0730853	0.486829	0.778432	Rfc2	S
ENSMUSG00000001436	5119.1	-0.041814	0.0804693	0.488049	0.778798	Slc19a1	S
ENSMUSG00000041406	3461.41	0.0423182	0.0744416	0.48915	0.779611	BC055324	S
ENSMUSG00000006728	34569.9	-0.0409066	0.076923	0.490026	0.780089	Cdk4	S
ENSMUSG00000062822	2263.1	0.0422036	0.0809725	0.502947	0.787028	4833420G17Rik	S
ENSMUSG00000040044	7733.58	-0.03618	0.0722714	0.513785	0.793719	Orc3	S
ENSMUSG00000004880	45083.2	0.0432923	0.074287	0.518963	0.796906	Lbr	S
ENSMUSG00000000028	8516.81	0.0352029	0.0669948	0.522181	0.799101	Cdc45	S
ENSMUSG00000032782	1407.22	-0.0392474	0.085453	0.52302	0.799512	Cntrob	S
ENSMUSG00000038759	8145.44	0.0352119	0.107582	0.525595	0.801161	Nup205	S
ENSMUSG00000027242	715.003	0.0392352	0.0964085	0.526181	0.801869	Wdr76	S
ENSMUSG00000033762	934.271	0.0389807	0.0914585	0.529179	0.803915	Recql4	S
ENSMUSG00000026960	3591.68	-0.0354524	0.10599	0.533127	0.806665	Arl6ip6	S
ENSMUSG00000042489	1725.89	-0.0373633	0.0885334	0.533765	0.807016	Clspn	S
ENSMUSG00000027490	2996.47	0.0341384	0.0679555	0.538919	0.80896	E2f1	S
ENSMUSG00000078773	2134.52	0.0327819	0.0616085	0.538975	0.80896	Rad54b	S
ENSMUSG00000031697	6073.87	-0.0354758	0.0736967	0.540656	0.80941	Orc6	S
ENSMUSG00000029003	1852.5	-0.0358692	0.0741219	0.541972	0.810046	Mad2l2	S
ENSMUSG00000036202	6258.92	0.0383782	0.0976016	0.545726	0.812553	Rif1	S
ENSMUSG00000021048	11713.4	-0.0371078	0.0868815	0.546576	0.812704	Mthfd1	S
ENSMUSG00000020185	1762.85	0.0369316	0.0895887	0.55142	0.814365	E2f7	S
ENSMUSG00000020471	10629.5	-0.0339236	0.084145	0.556649	0.816444	Pold2	S
ENSMUSG00000005470	26836.6	0.035551	0.0863804	0.557777	0.81679	Asf1b	S
ENSMUSG00000073542	2070.42	0.0357515	0.0908537	0.563408	0.820107	Cep76	S
ENSMUSG00000024258	3972.22	-0.0351288	0.0790926	0.566651	0.82118	Polr2d	S
ENSMUSG00000035726	5655.26	0.0346181	0.0834606	0.568266	0.822077	Supt16	S
ENSMUSG00000038047	3059.13	-0.0345889	0.0833882	0.568258	0.822077	Haus6	S
ENSMUSG00000030662	11936.6	0.0355466	0.0914603	0.582351	0.830508	Ipo5	S
ENSMUSG00000019773	12386.1	-0.0314362	0.0735504	0.591115	0.83598	Fbxo5	S
ENSMUSG00000019988	3688.92	-0.0325329	0.0819479	0.592037	0.836534	Nedd1	S
ENSMUSG00000027424	1551.9	0.0269713	0.0595683	0.605496	0.844324	Mgme1	S
ENSMUSG00000026999	2996.63	-0.0309772	0.0887251	0.612925	0.848318	Nup35	S
ENSMUSG00000029191	8165.64	0.0269156	0.0654384	0.613172	0.848318	Rfc1	S
ENSMUSG00000035367	1625.5	0.0311062	0.0874904	0.615075	0.849232	Rmi1	S
ENSMUSG00000038010	1202.83	0.0306251	0.0969576	0.617203	0.850567	Ccdc138	S
ENSMUSG00000043065	1307.83	0.0317749	0.0850268	0.61757	0.850666	Spice1	S
ENSMUSG00000030346	5994.86	-0.0297743	0.0809992	0.620352	0.852341	Rad51ap1	S
ENSMUSG00000029366	30225.9	-0.0285748	0.0842418	0.622968	0.853245	Dck	S
ENSMUSG00000024151	11742.6	-0.026743	0.0639609	0.633206	0.857436	Msh2	S
ENSMUSG00000027641	8560.35	-0.0319487	0.0941613	0.634075	0.857495	Rbl1	S
ENSMUSG00000030528	3142.58	0.0283651	0.0896388	0.64723	0.864461	Blm	S
ENSMUSG00000078521	1539.51	-0.0266339	0.0972033	0.649655	0.865297	Aunip	S
ENSMUSG00000035455	15151.7	-0.0266888	0.069512	0.650859	0.866295	Fignl1	S
ENSMUSG00000034303	658.875	-0.0260326	0.0912777	0.668178	0.875836	Ccdc15	S
ENSMUSG00000074909	1122.21	-0.0245803	0.0821154	0.672381	0.876724	Ranbp6	S
ENSMUSG00000048799	2146	-0.0234898	0.0976397	0.683172	0.881575	Cep120	S
ENSMUSG00000075031	50.2732	-0.0178132	0.112681	0.689617	0.884148	Hist1h2bb	S
ENSMUSG00000015478	951.089	0.0232106	0.0790101	0.696765	0.888042	Rnf5	S
ENSMUSG00000019214	4106.41	0.0220685	0.071737	0.703784	0.891092	Chtf18	S
ENSMUSG00000030726	8274.89	0.0215959	0.0547533	0.7151	0.894622	Pold3	S
ENSMUSG00000033596	9199.51	0.0253704	0.101153	0.715743	0.894742	Rfwd3	S
ENSMUSG00000006585	5693.22	0.0229792	0.0861738	0.716022	0.894828	Cdt1	S
ENSMUSG00000026662	9255.65	0.0193524	0.0576704	0.718005	0.895365	Sephs1	S
ENSMUSG00000040312	1252.75	0.021446	0.093839	0.719813	0.896169	Cchcr1	S
ENSMUSG00000024691	12163.4	0.0206295	0.0705288	0.721086	0.897065	Fam111a	S
ENSMUSG00000000568	26049.3	-0.0221634	0.0673919	0.722618	0.898143	Hnrnpd	S
ENSMUSG00000028933	1079.41	-0.0203122	0.0991693	0.723706	0.898528	Xrcc2	S
ENSMUSG00000052798	11292.1	0.0161008	0.0588103	0.730172	0.900903	Nup107	S
ENSMUSG00000000759	3649.26	0.0210247	0.0833258	0.731438	0.900995	Tubgcp3	S
ENSMUSG00000027722	2718.2	-0.0205682	0.0773546	0.731805	0.901002	Spata5	S
ENSMUSG00000021671	1812.66	-0.01768	0.0639894	0.735075	0.902137	Poc5	S
ENSMUSG00000031016	6905.78	0.0174147	0.0679122	0.753219	0.907998	Wee1	S
ENSMUSG00000031928	3224.12	0.0151837	0.0603831	0.75551	0.9085	Mre11a	S
ENSMUSG00000069306	41.9229	-0.0127759	0.113513	0.757426	0.909032	Hist1h4m	S
ENSMUSG00000059791	6020.88	0.0172193	0.0693613	0.761616	0.910787	Nrm	S
ENSMUSG00000036181	384.868	0.0176476	0.0989305	0.764799	0.91178	Hist1h1c	S
ENSMUSG00000021597	2492.87	-0.0173873	0.0942989	0.769655	0.914714	Slf1	S
ENSMUSG00000025395	10294	-0.0172156	0.0802147	0.774093	0.91662	Prim1	S
ENSMUSG00000016619	5353.72	0.0167723	0.0632368	0.776889	0.917982	Nup50	S
ENSMUSG00000040195	1114.06	0.015773	0.105948	0.784241	0.921041	Nemp1	S
ENSMUSG00000025364	13094.1	-0.0172744	0.0790322	0.784381	0.921123	Pa2g4	S
ENSMUSG00000020899	1628.27	-0.0164776	0.0855068	0.785507	0.921834	Pfas	S
ENSMUSG00000047832	10091.1	-0.0158097	0.0746986	0.7871	0.922343	Cdca4	S
ENSMUSG00000032113	4022.94	-0.0166689	0.083408	0.788058	0.922691	Chek1	S
ENSMUSG00000006678	6602.59	-0.0153127	0.0971151	0.792244	0.924589	Pola1	S
ENSMUSG00000017548	8085.81	0.0183119	0.0833598	0.793615	0.925581	Suz12	S
ENSMUSG00000022034	9955.6	0.0203084	0.0848899	0.794823	0.925771	Esco2	S
ENSMUSG00000024974	13180.5	-0.0128695	0.0604084	0.796056	0.926373	Smc3	S
ENSMUSG00000056394	19989.1	0.0147897	0.0662515	0.797433	0.926991	Lig1	S
ENSMUSG00000029730	41325.9	0.0126709	0.0633261	0.815221	0.934928	Mcm7	S
ENSMUSG00000030978	58912.3	0.0129371	0.0726672	0.827743	0.939945	Rrm1	S
ENSMUSG00000037443	6829.06	0.0126142	0.0712537	0.827741	0.939945	Cep85	S
ENSMUSG00000019303	2008.74	0.0138196	0.0772881	0.83566	0.943075	Psmc3ip	S
ENSMUSG00000005566	20570.6	0.0248575	0.0776696	0.837642	0.943798	Trim28	S
ENSMUSG00000017561	13404.5	0.011025	0.0554121	0.844217	0.945948	Crlf3	S
ENSMUSG00000026355	63934.1	0.0104328	0.0607503	0.843565	0.945948	Mcm6	S
ENSMUSG00000020739	13581.4	0.0154385	0.0761436	0.847497	0.946821	Nup85	S
ENSMUSG00000004642	34758.9	-0.0127102	0.0896418	0.848913	0.947132	Slbp	S
ENSMUSG00000039055	1687.99	0.0118206	0.0749693	0.848465	0.947132	Eme1	S
ENSMUSG00000058773	3443.47	-0.00951898	0.103107	0.848714	0.947132	Hist1h1b	S
ENSMUSG00000005698	14653.1	0.00697432	0.0418525	0.854116	0.94873	Ctcf	S
ENSMUSG00000031527	11645	-0.0102417	0.0798121	0.855172	0.949505	Eri1	S
ENSMUSG00000015165	14531.6	0.00769935	0.068954	0.862554	0.952035	Hnrnpl	S
ENSMUSG00000025358	10200.9	0.0133002	0.0692931	0.862595	0.952035	Cdk2	S
ENSMUSG00000031821	3399.1	-0.0107841	0.0850303	0.861797	0.952035	Gins2	S
ENSMUSG00000037608	10755.3	0.0100168	0.0773006	0.864327	0.953241	Bclaf1	S
ENSMUSG00000054099	638.19	0.00808686	0.10759	0.871947	0.955487	Slc25a40	S
ENSMUSG00000009575	6626.69	0.00892632	0.0716619	0.877156	0.95769	Cbx5	S
ENSMUSG00000040599	3942.2	0.00914435	0.074919	0.877869	0.958039	Mis12	S
ENSMUSG00000002718	22224.7	0.0110326	0.0772354	0.878818	0.958472	Cse1l	S
ENSMUSG00000020358	17446.9	-0.00904561	0.0612756	0.880222	0.95913	Hnrnpab	S
ENSMUSG00000026037	3384.23	0.00771154	0.0715494	0.888472	0.962079	Orc2	S
ENSMUSG00000005410	40025.7	0.00774001	0.0661658	0.88995	0.962487	Mcm5	S
ENSMUSG00000047246	261.662	0.00742382	0.10572	0.890296	0.962619	Hist1h2be	S
ENSMUSG00000032939	12603.2	-0.0072716	0.065511	0.90023	0.966072	Nup93	S
ENSMUSG00000050107	3516.61	-0.00710022	0.0674705	0.899367	0.966072	Haspin	S
ENSMUSG00000041346	1772.68	-0.00751706	0.0856137	0.901632	0.966631	Wrap53	S
ENSMUSG00000015749	34964.4	0.0133474	0.0637587	0.906298	0.968206	Anp32e	S
ENSMUSG00000007570	905.77	-0.00689284	0.0825951	0.907721	0.96863	Fance	S
ENSMUSG00000021377	19767	0.00677449	0.0840889	0.908022	0.968675	Dek	S
ENSMUSG00000028702	5517.61	-0.00674754	0.0771182	0.909243	0.9688	Rad54l	S
ENSMUSG00000034021	6051.85	0.0111447	0.0936614	0.917718	0.970868	Pds5b	S
ENSMUSG00000037572	5657.26	0.00806632	0.0929938	0.918534	0.971015	Wdhd1	S
ENSMUSG00000014355	8477.41	0.00350343	0.103346	0.919255	0.9713	Anapc1	S
ENSMUSG00000025862	11059.7	0.00788472	0.100774	0.923485	0.973272	Stag2	S
ENSMUSG00000022142	4040.08	-0.00509807	0.0902781	0.929947	0.976106	Nup155	S
ENSMUSG00000039396	7209.23	0.00927294	0.0803656	0.937892	0.978578	Neil3	S
ENSMUSG00000042208	2561.35	0.00372648	0.0901175	0.947073	0.982028	0610010F05Rik	S
ENSMUSG00000062727	43.5573	-0.00265703	0.11242	0.947344	0.982028	Hist1h2bk	S
ENSMUSG00000031577	1189.29	-0.00368246	0.0706807	0.953415	0.984538	Tti2	S
ENSMUSG00000035439	2572.51	0.00606888	0.0837875	0.953217	0.984538	Haus8	S
ENSMUSG00000021929	9260.18	0.00341255	0.0981345	0.955435	0.985194	Kpna3	S
ENSMUSG00000028688	604.759	-0.00589078	0.0797384	0.956937	0.985607	Toe1	S
ENSMUSG00000043015	1122.69	-0.00261164	0.0886783	0.964904	0.988306	Nemp2	S
ENSMUSG00000034883	1761.8	-0.0023728	0.0947469	0.966528	0.989124	Lrr1	S
ENSMUSG00000039748	5025.66	-0.00246047	0.0704507	0.970825	0.991196	Exo1	S
ENSMUSG00000041147	1800.79	-0.0016962	0.0809826	0.97632	0.99221	Brca2	S
ENSMUSG00000022604	865.287	-0.00114931	0.0939245	0.976674	0.992461	Cep97	S
ENSMUSG00000029283	4111.48	-0.00106236	0.0834011	0.987913	0.995925	Cdc7	S
ENSMUSG00000039231	7091.31	-0.000752932	0.0544901	0.990383	0.997044	Suv39h1	S
ENSMUSG00000022945	9471.44	-0.000135832	0.0829378	0.995959	0.998187	Chaf1b	S
ENSMUSG00000026429	3075.24	0.000321405	0.0828929	0.995652	0.998187	Ube2t	S
ENSMUSG00000063689	0.466833	-0.00266934	0.121062	0.639722	1	Hist2h2ab	S
ENSMUSG00000069274	14.0431	0.00733167	0.118328	0.796094	1	Hist1h4f	S
ENSMUSG00000105827	0	NA	NA	NA	1	Hist2h2bb	S
ENSMUSG00000113786	0	NA	NA	NA	1	Gm49384	S
ENSMUSG00000033111	713.99	-0.612847	0.127351	8.88005e-08	1.8572e-05	3830406C13Rik	G2M
ENSMUSG00000027550	1936.18	-0.760597	0.168613	3.26272e-07	5.4942e-05	Lrrcc1	G2M
ENSMUSG00000029516	1175.81	0.505447	0.13274	9.14004e-06	0.000860208	Cit	G2M
ENSMUSG00000027306	20379.8	-0.304895	0.0893382	7.33281e-05	0.00455741	Nusap1	G2M
ENSMUSG00000028549	901.965	-0.427896	0.132016	8.35698e-05	0.00502792	Itgb3bp	G2M
ENSMUSG00000029521	1710.05	-0.352467	0.108294	0.000108434	0.00592832	Chek2	G2M
ENSMUSG00000029012	1508.51	-0.327832	0.101363	0.000122035	0.00649175	Orc5	G2M
ENSMUSG00000038225	430.697	-0.446533	0.150075	0.000190965	0.00929022	Primpol	G2M
ENSMUSG00000020415	1180.66	-0.220774	0.0747513	0.000617948	0.0211483	Pttg1	G2M
ENSMUSG00000019942	18046.7	-0.244982	0.0877762	0.000691752	0.0227295	Cdk1	G2M
ENSMUSG00000028068	3314.9	0.34449	0.135598	0.000906358	0.026847	Iqgap3	G2M
ENSMUSG00000001517	5361.04	0.264191	0.102015	0.00130738	0.034354	Foxm1	G2M
ENSMUSG00000056531	1126.47	-0.357697	0.15208	0.00136316	0.0348081	Ccdc18	G2M
ENSMUSG00000035351	5251.7	-0.2489	0.101908	0.00210435	0.0469947	Nup37	G2M
ENSMUSG00000025925	3609.27	-0.245871	0.10361	0.00249214	0.0514656	Terf1	G2M
ENSMUSG00000069910	2194.65	-0.173276	0.0687115	0.00344225	0.0622155	Spdl1	G2M
ENSMUSG00000037991	1890.57	0.259483	0.125713	0.0046729	0.0764846	Rmi2	G2M
ENSMUSG00000062248	7960.94	-0.251802	0.120578	0.00472324	0.0770215	Cks2	G2M
ENSMUSG00000036752	31767.5	-0.155462	0.0639393	0.00489099	0.0784147	Tubb4b	G2M
ENSMUSG00000075266	2393.13	-0.234813	0.111867	0.00541899	0.0843136	Cenpw	G2M
ENSMUSG00000007035	1236.36	0.225588	0.109334	0.00639408	0.0917422	Msh5	G2M
ENSMUSG00000028678	6639.4	-0.187266	0.0848466	0.00647571	0.092403	Kif2c	G2M
ENSMUSG00000026605	5295.76	0.199386	0.0962989	0.00763737	0.101034	Cenpf	G2M
ENSMUSG00000018102	381.942	-0.366218	0.297022	0.00825318	0.105782	Hist1h2bc	G2M
ENSMUSG00000059060	545.222	-0.251541	0.142336	0.00828746	0.106118	Rad51b	G2M
ENSMUSG00000020898	6106.2	0.156866	0.0738693	0.0105264	0.11914	Ctc1	G2M
ENSMUSG00000030867	12248.7	-0.156097	0.0794152	0.0153857	0.148084	Plk1	G2M
ENSMUSG00000041840	3339.57	-0.223432	0.145254	0.0164835	0.153029	Haus1	G2M
ENSMUSG00000030654	46451.5	-0.131647	0.0683156	0.0180691	0.161315	Arl6ip1	G2M
ENSMUSG00000030677	17265.4	-0.158432	0.0858522	0.0196624	0.168448	Kif22	G2M
ENSMUSG00000021115	9418.57	-0.140681	0.0739805	0.0217761	0.177881	Vrk1	G2M
ENSMUSG00000022391	11387.7	0.126702	0.064737	0.0223395	0.180027	Rangap1	G2M
ENSMUSG00000022033	22863.3	-0.177173	0.109176	0.0226909	0.181516	Pbk	G2M
ENSMUSG00000018362	55891.5	-0.163232	0.0992321	0.025464	0.192271	Kpna2	G2M
ENSMUSG00000022364	2915.27	0.145059	0.0814995	0.0274667	0.200166	Tbc1d31	G2M
ENSMUSG00000029177	14012.1	-0.127746	0.0730921	0.0302081	0.209901	Cenpa	G2M
ENSMUSG00000041064	2354.03	0.151948	0.0950229	0.0332388	0.220884	Pif1	G2M
ENSMUSG00000041431	43711.2	-0.154843	0.100511	0.0356489	0.227904	Ccnb1	G2M
ENSMUSG00000051517	4222.43	0.135307	0.0818799	0.037153	0.232776	Arhgef39	G2M
ENSMUSG00000020309	330.288	-0.179594	0.167937	0.0388288	0.238179	Chac2	G2M
ENSMUSG00000001403	19956.3	-0.106343	0.0600541	0.0393162	0.239484	Ube2c	G2M
ENSMUSG00000022978	4575.5	-0.161052	0.120701	0.0427527	0.249583	Mis18a	G2M
ENSMUSG00000028718	3283.4	0.163883	0.141851	0.0460594	0.257969	Stil	G2M
ENSMUSG00000015217	11264.8	-0.124289	0.0834644	0.0542804	0.282137	Hmgb3	G2M
ENSMUSG00000037628	3163.67	-0.133042	0.0937731	0.0560594	0.285047	Cdkn3	G2M
ENSMUSG00000027496	10622.6	-0.126721	0.0867803	0.0575448	0.287964	Aurka	G2M
ENSMUSG00000031004	19432.6	0.131112	0.0947828	0.0605654	0.296108	Mki67	G2M
ENSMUSG00000020687	3352.46	-0.135706	0.107166	0.0634488	0.302899	Cdc27	G2M
ENSMUSG00000020897	18185.8	-0.113956	0.0759792	0.0636276	0.303367	Aurkb	G2M
ENSMUSG00000029910	11974.6	-0.123413	0.0877018	0.065364	0.308071	Mad2l1	G2M
ENSMUSG00000029464	3352.21	-0.109276	0.0709495	0.0655641	0.308746	Gpn3	G2M
ENSMUSG00000023908	3085.52	0.134846	0.0992861	0.0670402	0.312786	Pkmyt1	G2M
ENSMUSG00000044906	1774.38	-0.140153	0.121566	0.0677302	0.313824	4930503L19Rik	G2M
ENSMUSG00000031878	3597.07	-0.138162	0.129084	0.0723127	0.326128	Nae1	G2M
ENSMUSG00000027752	7987.96	-0.109594	0.0775223	0.0769109	0.33638	Exosc8	G2M
ENSMUSG00000048668	1898.36	0.106404	0.0735409	0.0769405	0.33638	Rhno1	G2M
ENSMUSG00000026281	7765.32	-0.0859306	0.057632	0.0847226	0.35066	Dtymk	G2M
ENSMUSG00000058290	4172.02	0.132981	0.134498	0.0850151	0.351426	Espl1	G2M
ENSMUSG00000072980	3426.05	-0.126113	0.140707	0.0894156	0.360839	Oip5	G2M
ENSMUSG00000027160	1369.22	-0.123358	0.115648	0.091368	0.364476	Ccdc34	G2M
ENSMUSG00000066979	25969.1	-0.08631	0.0628099	0.0933162	0.369222	Bub3	G2M
ENSMUSG00000028044	14823	-0.0740182	0.0528216	0.0956279	0.37321	Cks1b	G2M
ENSMUSG00000020330	9690.69	-0.0927201	0.0656869	0.0968277	0.376454	Hmmr	G2M
ENSMUSG00000033752	972.835	0.123418	0.117704	0.0970006	0.376793	Mnd1	G2M
ENSMUSG00000027654	1512.48	-0.122277	0.131171	0.0997102	0.382803	Fam83d	G2M
ENSMUSG00000024301	284.27	0.112326	0.142381	0.110628	0.401825	Kifc5b	G2M
ENSMUSG00000010517	7320.54	-0.0856172	0.0598328	0.112036	0.403558	Faf1	G2M
ENSMUSG00000034192	3369.17	-0.108244	0.0941202	0.112191	0.403558	Lsm3	G2M
ENSMUSG00000008822	1047.4	-0.115422	0.120265	0.115333	0.407927	Acyp1	G2M
ENSMUSG00000039187	2826.14	0.104586	0.0896188	0.115185	0.407927	Fanci	G2M
ENSMUSG00000036023	6653.71	-0.108202	0.09536	0.116917	0.410468	Parp2	G2M
ENSMUSG00000020492	2366.73	-0.111535	0.118343	0.121894	0.41778	Ska2	G2M
ENSMUSG00000025630	24359.2	-0.0994181	0.091097	0.128487	0.429355	Hprt	G2M
ENSMUSG00000021569	6223.94	-0.0875427	0.0715018	0.133829	0.4374	Trip13	G2M
ENSMUSG00000037725	5359.37	-0.0946933	0.0909874	0.140819	0.447307	Ckap2	G2M
ENSMUSG00000022024	2998.78	-0.0895864	0.0754052	0.141367	0.447644	Sugt1	G2M
ENSMUSG00000068744	1309.2	0.0988604	0.0966325	0.145434	0.454086	Psrc1	G2M
ENSMUSG00000031371	2927.97	-0.086889	0.0762955	0.146435	0.455561	Haus7	G2M
ENSMUSG00000039298	1471.74	-0.099937	0.106911	0.148493	0.459067	Cdk5rap2	G2M
ENSMUSG00000023004	41713.3	-0.0753475	0.0616547	0.154178	0.46829	Tuba1b	G2M
ENSMUSG00000048327	10095.9	0.0718331	0.0580922	0.159491	0.477623	Ckap2l	G2M
ENSMUSG00000047044	2042.04	-0.0897875	0.092334	0.177852	0.506239	D030056L22Rik	G2M
ENSMUSG00000068101	3810.2	0.0897219	0.0942745	0.18215	0.51151	Cenpm	G2M
ENSMUSG00000038252	18200.1	0.0893414	0.0806858	0.188156	0.518226	Ncapd2	G2M
ENSMUSG00000019715	6371.83	-0.0602009	0.0507564	0.190157	0.520356	Gle1	G2M
ENSMUSG00000028394	5778.52	-0.0790478	0.080643	0.193108	0.524076	Pole3	G2M
ENSMUSG00000024660	12918.8	-0.0723679	0.0750408	0.20797	0.543046	Incenp	G2M
ENSMUSG00000028832	89660.1	-0.0754751	0.0832515	0.215794	0.551991	Stmn1	G2M
ENSMUSG00000022070	4621.01	-0.0724437	0.079477	0.216156	0.552381	Bora	G2M
ENSMUSG00000019992	2337.26	-0.0809526	0.0967699	0.222733	0.559803	Mtfr2	G2M
ENSMUSG00000020895	1113.5	0.0731799	0.0739842	0.222842	0.559803	Tmem107	G2M
ENSMUSG00000021615	595.497	-0.080318	0.108885	0.227705	0.564863	Xrcc4	G2M
ENSMUSG00000003778	14889.9	0.0661564	0.0624753	0.23009	0.56656	Brd8	G2M
ENSMUSG00000023919	3615.61	-0.0789262	0.0921144	0.231849	0.569237	Cenpq	G2M
ENSMUSG00000022678	9820.48	-0.0668404	0.0708713	0.235123	0.571432	Nde1	G2M
ENSMUSG00000032400	1689.65	-0.0717856	0.076989	0.237492	0.574525	Zwilch	G2M
ENSMUSG00000057110	4826.62	0.0760656	0.0884877	0.238065	0.575549	Cntrl	G2M
ENSMUSG00000072082	13287.1	0.0607809	0.0607366	0.248476	0.586723	Ccnf	G2M
ENSMUSG00000022385	5328.69	0.0651495	0.0703747	0.254993	0.594547	Gtse1	G2M
ENSMUSG00000037313	21504.3	-0.0654099	0.0725558	0.257691	0.596197	Tacc3	G2M
ENSMUSG00000033952	3457.05	0.0723044	0.108281	0.260472	0.599388	Aspm	G2M
ENSMUSG00000036672	1625.85	0.0729487	0.105075	0.26089	0.599446	Cenpt	G2M
ENSMUSG00000012443	26860.7	0.081601	0.100192	0.261533	0.59956	Kif11	G2M
ENSMUSG00000028551	4081.28	0.074496	0.0973987	0.261603	0.59956	Cdkn2c	G2M
ENSMUSG00000028619	893.426	0.0722221	0.0919511	0.264667	0.60227	Tceanc2	G2M
ENSMUSG00000029414	3104.73	0.0715921	0.117527	0.267694	0.605791	Kntc1	G2M
ENSMUSG00000026622	8043.28	0.0554124	0.0569293	0.270084	0.60852	Nek2	G2M
ENSMUSG00000061533	1917.06	0.0710913	0.0986491	0.278138	0.615451	Cep128	G2M
ENSMUSG00000029715	1551.84	-0.0676834	0.0883559	0.284824	0.621007	Pop7	G2M
ENSMUSG00000060288	3894.1	-0.0653619	0.0828965	0.286294	0.62275	Ppih	G2M
ENSMUSG00000069135	5616.96	-0.0644791	0.0747057	0.286597	0.622941	Fgfr1op	G2M
ENSMUSG00000024370	7289.53	-0.0593138	0.067135	0.292128	0.627571	Cdc23	G2M
ENSMUSG00000038215	1300.08	-0.0669845	0.100638	0.295528	0.631406	Cep44	G2M
ENSMUSG00000021902	1080.58	0.0666815	0.0910301	0.304383	0.63771	Phf7	G2M
ENSMUSG00000020808	8785.99	0.0645205	0.085474	0.312037	0.644198	Pimreg	G2M
ENSMUSG00000038383	4250.35	-0.0601784	0.0743496	0.312396	0.644656	Pigu	G2M
ENSMUSG00000020268	460.465	-0.0654877	0.0932168	0.312721	0.644979	Lyrm7	G2M
ENSMUSG00000044201	2648.24	-0.0627836	0.0868563	0.313056	0.645129	Cdc25c	G2M
ENSMUSG00000037905	2320.46	-0.0607112	0.0768329	0.314236	0.646427	Bri3bp	G2M
ENSMUSG00000032815	1428.74	0.0620253	0.0828641	0.318935	0.649908	Fanca	G2M
ENSMUSG00000054717	94656.4	0.0619331	0.0827272	0.32158	0.652871	Hmgb2	G2M
ENSMUSG00000014606	6288.4	-0.0568743	0.0695791	0.323882	0.654922	Slc25a11	G2M
ENSMUSG00000026434	9136.67	0.0629418	0.0870438	0.324052	0.655165	Nucks1	G2M
ENSMUSG00000051378	7692.75	0.0494995	0.0577332	0.326609	0.657613	Kif18b	G2M
ENSMUSG00000034601	1714.57	-0.0611167	0.0848242	0.32811	0.659009	2700049A03Rik	G2M
ENSMUSG00000021965	4015.23	-0.0617381	0.0843114	0.333039	0.664074	Ska3	G2M
ENSMUSG00000036022	1073.22	-0.0634281	0.0975548	0.334582	0.664902	Fam122b	G2M
ENSMUSG00000033036	103.156	-0.0551211	0.116221	0.336592	0.667208	Gm7879	G2M
ENSMUSG00000022314	13465	0.0774545	0.0860956	0.342506	0.671613	Rad21	G2M
ENSMUSG00000058729	2273.72	-0.0605842	0.0891901	0.350768	0.678805	Lin9	G2M
ENSMUSG00000064128	1577.95	-0.0593162	0.0961303	0.351768	0.679265	Cenpj	G2M
ENSMUSG00000068854	818.596	0.0597583	0.0989197	0.353623	0.680792	Hist2h2be	G2M
ENSMUSG00000005233	13315.7	-0.0566241	0.0903789	0.366559	0.692342	Spc25	G2M
ENSMUSG00000003779	10414.7	0.0356065	0.0488991	0.37475	0.69853	Kif20a	G2M
ENSMUSG00000025758	8376.31	0.054238	0.0653659	0.374725	0.69853	Plk4	G2M
ENSMUSG00000032218	19857.3	-0.0530283	0.0774527	0.37969	0.70097	Ccnb2	G2M
ENSMUSG00000025154	3316.21	0.0534014	0.10814	0.380476	0.701828	Arhgap19	G2M
ENSMUSG00000037894	93606.5	-0.0522171	0.0794765	0.391783	0.710281	H2afz	G2M
ENSMUSG00000022322	13739.4	-0.0520079	0.0851545	0.393263	0.711718	Shcbp1	G2M
ENSMUSG00000035293	2699.79	-0.0525848	0.106384	0.393602	0.711984	G2e3	G2M
ENSMUSG00000026873	981.596	0.0527278	0.0993722	0.399596	0.717353	Phf19	G2M
ENSMUSG00000026779	1496.99	-0.0526196	0.0964213	0.407112	0.722312	Mastl	G2M
ENSMUSG00000038379	5593.5	-0.04815	0.0802019	0.423092	0.734518	Ttk	G2M
ENSMUSG00000066878	690.786	-0.0486155	0.10133	0.429731	0.739279	Gm10184	G2M
ENSMUSG00000051768	5910.81	0.0433954	0.0732291	0.441919	0.748422	Xrcc1	G2M
ENSMUSG00000028614	6375.13	0.0489156	0.0993021	0.442057	0.748559	Ndc1	G2M
ENSMUSG00000040667	9208.69	-0.0394489	0.0707146	0.445547	0.750971	Nup88	G2M
ENSMUSG00000006398	22368.4	-0.0454602	0.0789531	0.455479	0.758914	Cdc20	G2M
ENSMUSG00000015880	12467.1	-0.0446604	0.0866915	0.45573	0.758914	Ncapg	G2M
ENSMUSG00000026239	2643.57	-0.0370352	0.0855525	0.461833	0.763886	Pde6d	G2M
ENSMUSG00000096472	6382.01	0.0458098	0.0864879	0.46324	0.764965	Cdkn2d	G2M
ENSMUSG00000020493	2025.62	0.0452709	0.0919715	0.47074	0.769428	Prr11	G2M
ENSMUSG00000027635	3353.76	0.0426784	0.0742425	0.474901	0.772542	Dsn1	G2M
ENSMUSG00000032254	10055	-0.0388053	0.0674564	0.480491	0.775281	Kif23	G2M
ENSMUSG00000021391	1098.58	-0.0413578	0.103047	0.487387	0.778432	Cenpp	G2M
ENSMUSG00000034349	30811.8	-0.0532726	0.0982538	0.491708	0.780948	Smc4	G2M
ENSMUSG00000027699	9900.43	-0.0403474	0.0890715	0.495148	0.782594	Ect2	G2M
ENSMUSG00000033031	6868.17	-0.041478	0.0845564	0.496697	0.783395	C330027C09Rik	G2M
ENSMUSG00000032783	1736.55	-0.0401588	0.0768291	0.501496	0.786384	Troap	G2M
ENSMUSG00000026039	726.063	-0.0412263	0.0941467	0.505486	0.788418	Sgo2a	G2M
ENSMUSG00000034311	6158.28	0.0413503	0.0810525	0.506707	0.788982	Kif4	G2M
ENSMUSG00000026708	4597.86	-0.0399804	0.0816883	0.511085	0.792553	Cenpl	G2M
ENSMUSG00000026790	7245.18	0.0326737	0.0576554	0.5178	0.796452	Odf2	G2M
ENSMUSG00000017716	15920.6	-0.0300556	0.0559661	0.531922	0.80615	Birc5	G2M
ENSMUSG00000022429	86.9187	-0.0258616	0.116022	0.536819	0.808518	Dmc1	G2M
ENSMUSG00000040084	25148	0.0408258	0.0611239	0.542202	0.810046	Bub1b	G2M
ENSMUSG00000031756	6312.18	-0.034383	0.0725599	0.546614	0.812704	Cenpn	G2M
ENSMUSG00000024260	868.855	0.0374545	0.0899665	0.549056	0.813946	Sap130	G2M
ENSMUSG00000027469	16633.7	0.0218021	0.0384863	0.54974	0.81413	Tpx2	G2M
ENSMUSG00000030641	1981.46	0.0362833	0.0882006	0.562742	0.819748	Ddias	G2M
ENSMUSG00000027379	11947.8	-0.0278049	0.0659973	0.564135	0.820696	Bub1	G2M
ENSMUSG00000041498	609.634	0.0360123	0.0938372	0.566809	0.82118	Kif14	G2M
ENSMUSG00000035310	2543.88	0.0342599	0.089259	0.575667	0.827152	Lin54	G2M
ENSMUSG00000059409	6180.61	0.0319727	0.0584202	0.58558	0.832466	Ppp2r5d	G2M
ENSMUSG00000040549	10869.5	0.0322066	0.0974664	0.595107	0.838982	Ckap5	G2M
ENSMUSG00000037544	7915.03	-0.0259443	0.0550079	0.595321	0.839016	Dlgap5	G2M
ENSMUSG00000041133	15139.6	0.0277615	0.0559121	0.600969	0.840859	Smc1a	G2M
ENSMUSG00000051235	1845.09	-0.0297684	0.0997821	0.603762	0.843066	Gen1	G2M
ENSMUSG00000060981	19.9025	-0.0139012	0.118733	0.613167	0.848318	Hist1h4h	G2M
ENSMUSG00000021697	3849.43	-0.0303081	0.0742484	0.618904	0.851575	Depdc1b	G2M
ENSMUSG00000063172	259.874	-0.029417	0.0963941	0.620539	0.852341	Hspb11	G2M
ENSMUSG00000027326	6177.71	0.0301284	0.100302	0.620735	0.852363	Knl1	G2M
ENSMUSG00000002055	7870.05	0.0289954	0.0572308	0.621755	0.85264	Spag5	G2M
ENSMUSG00000036777	5515.61	-0.0300143	0.0822034	0.622133	0.85264	Anln	G2M
ENSMUSG00000022021	1219.32	0.0294257	0.0752796	0.6229	0.853242	Diaph3	G2M
ENSMUSG00000019370	11549	0.0446138	0.0835881	0.628827	0.855635	Calm3	G2M
ENSMUSG00000028873	15862.5	-0.0275895	0.0733571	0.631315	0.857193	Cdca8	G2M
ENSMUSG00000032221	2816.91	-0.0282528	0.0791656	0.63182	0.85735	Mns1	G2M
ENSMUSG00000030929	705.646	0.0267136	0.0928296	0.633905	0.857495	Eri2	G2M
ENSMUSG00000026683	12178	0.0329847	0.0701568	0.635068	0.858221	Nuf2	G2M
ENSMUSG00000041126	17411.1	0.0409856	0.0795078	0.646202	0.86405	H2afv	G2M
ENSMUSG00000041219	6298.45	0.0276676	0.0845597	0.652173	0.866869	Arhgap11a	G2M
ENSMUSG00000028312	14718.6	0.0268735	0.0656503	0.657098	0.869765	Smc2	G2M
ENSMUSG00000038943	9957.29	-0.0172896	0.0512663	0.664057	0.873645	Prc1	G2M
ENSMUSG00000028175	3501.82	-0.0229888	0.100195	0.683421	0.881616	Depdc1a	G2M
ENSMUSG00000019961	43304.4	-0.0188976	0.0752738	0.688271	0.883404	Tmpo	G2M
ENSMUSG00000034023	2582.41	-0.0241245	0.0912797	0.688548	0.883404	Fancd2	G2M
ENSMUSG00000034906	15496.1	0.022093	0.0619811	0.690497	0.884273	Ncaph	G2M
ENSMUSG00000053128	64.3021	0.0185028	0.113306	0.702542	0.89058	Rnf26	G2M
ENSMUSG00000033589	4444.54	-0.0165484	0.0545256	0.704779	0.891572	Reep4	G2M
ENSMUSG00000024542	2269.59	0.0203702	0.101945	0.712757	0.894366	Cep192	G2M
ENSMUSG00000048922	6741.62	0.0170046	0.0506919	0.713221	0.894366	Cdca2	G2M
ENSMUSG00000027883	3930.48	0.0242934	0.0745716	0.715452	0.894715	Gpsm2	G2M
ENSMUSG00000037020	1839.22	-0.0206137	0.0972676	0.726487	0.899896	Wdr62	G2M
ENSMUSG00000040204	52507.8	-0.0204907	0.0776112	0.728084	0.900151	Pclaf	G2M
ENSMUSG00000023345	2116.7	-0.0206004	0.0823068	0.733939	0.901169	Poc1a	G2M
ENSMUSG00000024989	6907.27	-0.0187929	0.075042	0.735501	0.90224	Cep55	G2M
ENSMUSG00000020235	11015	0.0187851	0.0806743	0.755284	0.9085	Fzr1	G2M
ENSMUSG00000027201	1026.81	-0.0217592	0.0775599	0.757378	0.909032	Myef2	G2M
ENSMUSG00000031360	4484.58	-0.0161339	0.0622888	0.767484	0.913677	Ctps2	G2M
ENSMUSG00000024056	10590.4	-0.0155115	0.0732281	0.769753	0.914714	Ndc80	G2M
ENSMUSG00000036768	6435.78	-0.0167336	0.0735347	0.773864	0.916534	Kif15	G2M
ENSMUSG00000038000	4922	0.0172049	0.0905038	0.778736	0.918834	Acd	G2M
ENSMUSG00000023015	17594.7	0.0158266	0.0554004	0.780562	0.919507	Racgap1	G2M
ENSMUSG00000027331	4083.76	0.0155691	0.0685628	0.785086	0.921637	Knstrn	G2M
ENSMUSG00000074476	9524.57	-0.0153473	0.0659599	0.787002	0.922338	Spc24	G2M
ENSMUSG00000023505	11706.5	-0.0127688	0.0672656	0.78877	0.922906	Cdca3	G2M
ENSMUSG00000050628	1043.4	-0.016229	0.0898292	0.789182	0.923044	Ubald2	G2M
ENSMUSG00000030177	1295.99	-0.0109599	0.095446	0.80731	0.931255	Ccdc77	G2M
ENSMUSG00000045328	6890.75	-0.012871	0.0753207	0.813335	0.934439	Cenpe	G2M
ENSMUSG00000031262	4840.28	-0.0121405	0.0689675	0.816299	0.935014	Cenpi	G2M
ENSMUSG00000001440	7079.04	-0.011902	0.0630799	0.818876	0.936427	Kpnb1	G2M
ENSMUSG00000035365	1341.01	0.0128983	0.0716886	0.820421	0.937055	Parpbp	G2M
ENSMUSG00000027715	31451.5	0.010828	0.060476	0.827834	0.939945	Ccna2	G2M
ENSMUSG00000019813	2240.29	-0.0126146	0.0734655	0.83229	0.942088	Cep57l1	G2M
ENSMUSG00000038481	1983.56	-0.0163751	0.103878	0.848199	0.947132	Cdk19	G2M
ENSMUSG00000024795	6292.52	-0.0130675	0.0917368	0.857759	0.950782	Kif20b	G2M
ENSMUSG00000036403	911.362	0.00969973	0.0997717	0.867382	0.954373	Cep135	G2M
ENSMUSG00000036223	2624.66	-0.00942831	0.0774794	0.871509	0.955324	Ska1	G2M
ENSMUSG00000035683	5194.8	0.00847864	0.0684976	0.873365	0.956011	Melk	G2M
ENSMUSG00000079553	1836.09	-0.00736266	0.0961612	0.881353	0.959316	Kifc1	G2M
ENSMUSG00000027184	34076	0.0110343	0.0885284	0.881987	0.959546	Caprin1	G2M
ENSMUSG00000027115	5578.42	-0.0081674	0.091402	0.886655	0.961616	Kif18a	G2M
ENSMUSG00000023932	7891.29	0.00756723	0.0689449	0.890788	0.962683	Cdc5l	G2M
ENSMUSG00000002297	5213.45	0.00797333	0.0725762	0.892617	0.963597	Dbf4	G2M
ENSMUSG00000047534	6398.37	-0.00672061	0.0920631	0.897629	0.965324	Mis18bp1	G2M
ENSMUSG00000020290	20827.6	0.00626505	0.099358	0.914387	0.970442	Xpo1	G2M
ENSMUSG00000033222	3620.3	-0.00598952	0.0684547	0.919609	0.971567	Ttf2	G2M
ENSMUSG00000038070	861.312	-0.00655774	0.0913162	0.932172	0.976245	Cntln	G2M
ENSMUSG00000002428	2288.81	-0.00464773	0.0953312	0.936176	0.977878	Hltf	G2M
ENSMUSG00000041879	8617.62	0.00496899	0.0786601	0.936127	0.977878	Ipo9	G2M
ENSMUSG00000050555	999.968	-0.00456385	0.0881137	0.940055	0.979763	Hyls1	G2M
ENSMUSG00000020914	46292.9	0.00215835	0.0847945	0.941402	0.980391	Top2a	G2M
ENSMUSG00000023072	1871.73	-0.00257002	0.0804399	0.955384	0.985194	Cep89	G2M
ENSMUSG00000019845	1760.84	-0.0016084	0.075813	0.958433	0.98651	Tube1	G2M
ENSMUSG00000003190	352.548	-0.00278851	0.092734	0.959348	0.987078	Bcl2l12	G2M
ENSMUSG00000049932	18020.8	0.00143313	0.0845493	0.965425	0.988456	H2afx	G2M
ENSMUSG00000027330	7150.62	-0.0012174	0.0944296	0.968001	0.990093	Cdc25b	G2M
ENSMUSG00000029782	6172.62	0.00174319	0.0786154	0.975057	0.99221	Tmem209	G2M
ENSMUSG00000023940	6371.73	0.000341119	0.0652687	0.99133	0.997375	Sgo1	G2M
ENSMUSG00000034317	12548	0.00141664	0.0918361	0.99572	0.998187	Trim59	G2M
ENSMUSG00000026187	1684.6	-0.758359	0.10534	2.95898e-14	1.85655e-11	Xrcc5	All_Gio
ENSMUSG00000001525	67884.2	0.537338	0.0792835	8.74872e-13	5.01188e-10	Tubb5	All_Gio
ENSMUSG00000031575	7782.51	-0.298256	0.0522522	1.54861e-09	5.36962e-07	Ash2l	All_Gio
ENSMUSG00000041298	622.584	0.85621	0.158838	3.78131e-09	1.1383e-06	Katnal1	All_Gio
ENSMUSG00000033111	713.99	-0.612847	0.127351	8.88005e-08	1.8572e-05	3830406C13Rik	All_Gio
ENSMUSG00000052369	1828.48	-0.49217	0.105406	2.06186e-07	3.72151e-05	Tmem106c	All_Gio
ENSMUSG00000027550	1936.18	-0.760597	0.168613	3.26272e-07	5.4942e-05	Lrrcc1	All_Gio
ENSMUSG00000062510	3192.23	-0.321159	0.0685697	3.29419e-07	5.4942e-05	Nsl1	All_Gio
ENSMUSG00000025747	12754.4	-0.337459	0.0781875	1.87594e-06	0.000230837	Tyms	All_Gio
ENSMUSG00000022177	5985.79	-0.336689	0.0833599	6.2771e-06	0.000626569	Haus4	All_Gio
ENSMUSG00000029516	1175.81	0.505447	0.13274	9.14004e-06	0.000860208	Cit	All_Gio
ENSMUSG00000027306	20379.8	-0.304895	0.0893382	7.33281e-05	0.00455741	Nusap1	All_Gio
ENSMUSG00000028549	901.965	-0.427896	0.132016	8.35698e-05	0.00502792	Itgb3bp	All_Gio
ENSMUSG00000029521	1710.05	-0.352467	0.108294	0.000108434	0.00592832	Chek2	All_Gio
ENSMUSG00000029012	1508.51	-0.327832	0.101363	0.000122035	0.00649175	Orc5	All_Gio
ENSMUSG00000006763	1804.82	-0.393628	0.125677	0.000132654	0.00688128	Saal1	All_Gio
ENSMUSG00000038225	430.697	-0.446533	0.150075	0.000190965	0.00929022	Primpol	All_Gio
ENSMUSG00000045273	2663.46	-0.372771	0.125763	0.000225576	0.0105024	Cenph	All_Gio
ENSMUSG00000018666	6115.74	-0.259641	0.0826706	0.000261389	0.0118723	Cbx1	All_Gio
ENSMUSG00000068114	1756.94	0.334805	0.111802	0.000263109	0.0118723	Ccdc134	All_Gio
ENSMUSG00000026196	636.976	0.47846	0.168665	0.000265891	0.0119569	Bard1	All_Gio
ENSMUSG00000029863	6514.46	-0.318235	0.112714	0.000437257	0.016748	Casp2	All_Gio
ENSMUSG00000020415	1180.66	-0.220774	0.0747513	0.000617948	0.0211483	Pttg1	All_Gio
ENSMUSG00000019942	18046.7	-0.244982	0.0877762	0.000691752	0.0227295	Cdk1	All_Gio
ENSMUSG00000018189	11319.4	-0.286059	0.108971	0.000871824	0.0265292	Uchl5	All_Gio
ENSMUSG00000028068	3314.9	0.34449	0.135598	0.000906358	0.026847	Iqgap3	All_Gio
ENSMUSG00000001517	5361.04	0.264191	0.102015	0.00130738	0.034354	Foxm1	All_Gio
ENSMUSG00000056531	1126.47	-0.357697	0.15208	0.00136316	0.0348081	Ccdc18	All_Gio
ENSMUSG00000001151	1622.71	0.349488	0.149211	0.00145738	0.0362434	Pcnt	All_Gio
ENSMUSG00000035351	5251.7	-0.2489	0.101908	0.00210435	0.0469947	Nup37	All_Gio
ENSMUSG00000021537	6608.21	-0.261566	0.11216	0.00230432	0.049893	Cetn3	All_Gio
ENSMUSG00000034206	619.934	0.498554	0.264666	0.00236639	0.0502086	Polq	All_Gio
ENSMUSG00000025925	3609.27	-0.245871	0.10361	0.00249214	0.0514656	Terf1	All_Gio
ENSMUSG00000069910	2194.65	-0.173276	0.0687115	0.00344225	0.0622155	Spdl1	All_Gio
ENSMUSG00000025436	939.897	-0.289087	0.143174	0.00403134	0.0690727	Atp23	All_Gio
ENSMUSG00000037991	1890.57	0.259483	0.125713	0.0046729	0.0764846	Rmi2	All_Gio
ENSMUSG00000062248	7960.94	-0.251802	0.120578	0.00472324	0.0770215	Cks2	All_Gio
ENSMUSG00000036752	31767.5	-0.155462	0.0639393	0.00489099	0.0784147	Tubb4b	All_Gio
ENSMUSG00000024800	4039.67	-0.208392	0.0918174	0.00513906	0.081385	Rpp30	All_Gio
ENSMUSG00000038544	6729.5	0.129916	0.0505045	0.00532452	0.0833205	Inip	All_Gio
ENSMUSG00000075266	2393.13	-0.234813	0.111867	0.00541899	0.0843136	Cenpw	All_Gio
ENSMUSG00000062075	6946.6	0.183899	0.0813645	0.00588583	0.0876291	Lmnb2	All_Gio
ENSMUSG00000007035	1236.36	0.225588	0.109334	0.00639408	0.0917422	Msh5	All_Gio
ENSMUSG00000028678	6639.4	-0.187266	0.0848466	0.00647571	0.092403	Kif2c	All_Gio
ENSMUSG00000055184	658.766	-0.274359	0.153316	0.00691312	0.0961851	Fam72a	All_Gio
ENSMUSG00000026605	5295.76	0.199386	0.0962989	0.00763737	0.101034	Cenpf	All_Gio
ENSMUSG00000039994	5046.56	0.16606	0.0737895	0.00795545	0.103374	Timeless	All_Gio
ENSMUSG00000002319	920.653	-0.255257	0.143213	0.00811904	0.104475	Ipo4	All_Gio
ENSMUSG00000018102	381.942	-0.366218	0.297022	0.00825318	0.105782	Hist1h2bc	All_Gio
ENSMUSG00000059060	545.222	-0.251541	0.142336	0.00828746	0.106118	Rad51b	All_Gio
ENSMUSG00000005732	13617.6	-0.207259	0.103958	0.00844472	0.107	Ranbp1	All_Gio
ENSMUSG00000020652	2876.6	0.170678	0.079025	0.00881011	0.108997	Cenpo	All_Gio
ENSMUSG00000001416	36013	-0.166766	0.0802873	0.00889209	0.109395	Cct3	All_Gio
ENSMUSG00000023909	157.401	0.362762	0.335704	0.0093793	0.112224	Paqr4	All_Gio
ENSMUSG00000017499	9541.95	0.175446	0.0837677	0.00954223	0.11284	Cdc6	All_Gio
ENSMUSG00000038628	6514.66	-0.226983	0.120707	0.00954893	0.11284	Polr3k	All_Gio
ENSMUSG00000020898	6106.2	0.156866	0.0738693	0.0105264	0.11914	Ctc1	All_Gio
ENSMUSG00000026245	10776.5	-0.165047	0.0808378	0.010949	0.121947	Farsb	All_Gio
ENSMUSG00000021572	2468.77	0.174209	0.0865946	0.0117886	0.127109	Cep72	All_Gio
ENSMUSG00000030393	923.084	0.263991	0.183834	0.0126733	0.131933	Zik1	All_Gio
ENSMUSG00000041238	4059.72	-0.133833	0.0609633	0.0130672	0.134405	Rbbp8	All_Gio
ENSMUSG00000033364	2482.93	0.201968	0.11208	0.0131718	0.135221	Usp37	All_Gio
ENSMUSG00000031629	489.962	-0.23851	0.154835	0.0138564	0.139152	Cenpu	All_Gio
ENSMUSG00000030867	12248.7	-0.156097	0.0794152	0.0153857	0.148084	Plk1	All_Gio
ENSMUSG00000068394	1206.12	0.26698	0.229093	0.0155461	0.148765	Cep152	All_Gio
ENSMUSG00000041840	3339.57	-0.223432	0.145254	0.0164835	0.153029	Haus1	All_Gio
ENSMUSG00000030654	46451.5	-0.131647	0.0683156	0.0180691	0.161315	Arl6ip1	All_Gio
ENSMUSG00000032249	1863.66	-0.251358	0.230265	0.0181403	0.161487	Anp32a	All_Gio
ENSMUSG00000030677	17265.4	-0.158432	0.0858522	0.0196624	0.168448	Kif22	All_Gio
ENSMUSG00000026669	5729.67	0.123082	0.0614148	0.0208416	0.174244	Mcm10	All_Gio
ENSMUSG00000007739	25643	-0.150788	0.0853219	0.0213023	0.175864	Cct4	All_Gio
ENSMUSG00000021115	9418.57	-0.140681	0.0739805	0.0217761	0.177881	Vrk1	All_Gio
ENSMUSG00000022391	11387.7	0.126702	0.064737	0.0223395	0.180027	Rangap1	All_Gio
ENSMUSG00000022033	22863.3	-0.177173	0.109176	0.0226909	0.181516	Pbk	All_Gio
ENSMUSG00000021175	5817.5	-0.148435	0.0851914	0.0254276	0.192147	Cdca7l	All_Gio
ENSMUSG00000018362	55891.5	-0.163232	0.0992321	0.025464	0.192271	Kpna2	All_Gio
ENSMUSG00000038126	1122.53	0.207163	0.159467	0.0261949	0.195438	Mphosph9	All_Gio
ENSMUSG00000022364	2915.27	0.145059	0.0814995	0.0274667	0.200166	Tbc1d31	All_Gio
ENSMUSG00000027454	3025.81	-0.148578	0.0857788	0.0277457	0.201399	Gins1	All_Gio
ENSMUSG00000026036	1848.5	-0.205029	0.168747	0.0285903	0.204843	Nif3l1	All_Gio
ENSMUSG00000061607	522.65	0.19677	0.248945	0.0300599	0.209684	Mdc1	All_Gio
ENSMUSG00000029177	14012.1	-0.127746	0.0730921	0.0302081	0.209901	Cenpa	All_Gio
ENSMUSG00000022863	798.907	-0.176114	0.122841	0.0306794	0.211197	Btg3	All_Gio
ENSMUSG00000078762	377.636	-0.187833	0.146584	0.0312526	0.213028	Haus5	All_Gio
ENSMUSG00000041064	2354.03	0.151948	0.0950229	0.0332388	0.220884	Pif1	All_Gio
ENSMUSG00000041431	43711.2	-0.154843	0.100511	0.0356489	0.227904	Ccnb1	All_Gio
ENSMUSG00000002835	6310.51	0.122749	0.0701939	0.0363011	0.229762	Chaf1a	All_Gio
ENSMUSG00000025066	8848.53	-0.147438	0.0958198	0.0363232	0.229762	Sfr1	All_Gio
ENSMUSG00000046179	3428.87	0.150023	0.0907385	0.0369542	0.232082	E2f8	All_Gio
ENSMUSG00000051517	4222.43	0.135307	0.0818799	0.037153	0.232776	Arhgef39	All_Gio
ENSMUSG00000007646	1155	0.138924	0.0858708	0.0383118	0.236421	Rad51c	All_Gio
ENSMUSG00000020309	330.288	-0.179594	0.167937	0.0388288	0.238179	Chac2	All_Gio
ENSMUSG00000001403	19956.3	-0.106343	0.0600541	0.0393162	0.239484	Ube2c	All_Gio
ENSMUSG00000033054	2624.59	0.157408	0.112208	0.0398593	0.240572	Npat	All_Gio
ENSMUSG00000056919	733.406	0.166772	0.12591	0.0397878	0.240572	Cep162	All_Gio
ENSMUSG00000000751	20724.2	0.123514	0.0757184	0.0411306	0.244556	Rpa1	All_Gio
ENSMUSG00000022978	4575.5	-0.161052	0.120701	0.0427527	0.249583	Mis18a	All_Gio
ENSMUSG00000012483	4465.71	-0.162404	0.126299	0.0431454	0.25028	Rpa3	All_Gio
ENSMUSG00000043091	10718.3	-0.11482	0.0667225	0.0445515	0.254447	Tuba1c	All_Gio
ENSMUSG00000028718	3283.4	0.163883	0.141851	0.0460594	0.257969	Stil	All_Gio
ENSMUSG00000029363	11264.3	-0.127658	0.0823261	0.0464392	0.259163	Rfc5	All_Gio
ENSMUSG00000004099	28911.2	0.147237	0.104329	0.046898	0.26029	Dnmt1	All_Gio
ENSMUSG00000027650	2870.49	0.145936	0.104439	0.0475682	0.261804	Tti1	All_Gio
ENSMUSG00000034773	1515.5	0.133672	0.0917844	0.0513422	0.273548	BC030867	All_Gio
ENSMUSG00000019373	8292.06	-0.137336	0.0970921	0.0525393	0.276883	Cops3	All_Gio
ENSMUSG00000015217	11264.8	-0.124289	0.0834644	0.0542804	0.282137	Hmgb3	All_Gio
ENSMUSG00000017550	2792.47	0.132186	0.0915278	0.0551231	0.283742	Atad5	All_Gio
ENSMUSG00000037628	3163.67	-0.133042	0.0937731	0.0560594	0.285047	Cdkn3	All_Gio
ENSMUSG00000027496	10622.6	-0.126721	0.0867803	0.0575448	0.287964	Aurka	All_Gio
ENSMUSG00000031065	3570.29	0.134994	0.0983921	0.0603607	0.295591	Cdk16	All_Gio
ENSMUSG00000031004	19432.6	0.131112	0.0947828	0.0605654	0.296108	Mki67	All_Gio
ENSMUSG00000057406	8948.79	0.139627	0.109349	0.0619185	0.299271	Nsd2	All_Gio
ENSMUSG00000030254	5529.57	-0.115384	0.0768227	0.0625382	0.300849	Rad18	All_Gio
ENSMUSG00000047242	652.978	0.149651	0.137457	0.0627218	0.301065	Taf9b	All_Gio
ENSMUSG00000074780	24.7299	-0.07357	0.147136	0.0628842	0.301296	Anapc15-ps	All_Gio
ENSMUSG00000020687	3352.46	-0.135706	0.107166	0.0634488	0.302899	Cdc27	All_Gio
ENSMUSG00000020897	18185.8	-0.113956	0.0759792	0.0636276	0.303367	Aurkb	All_Gio
ENSMUSG00000031971	943.451	0.141429	0.116973	0.0641009	0.304578	Ccsap	All_Gio
ENSMUSG00000029910	11974.6	-0.123413	0.0877018	0.065364	0.308071	Mad2l1	All_Gio
ENSMUSG00000029464	3352.21	-0.109276	0.0709495	0.0655641	0.308746	Gpn3	All_Gio
ENSMUSG00000023908	3085.52	0.134846	0.0992861	0.0670402	0.312786	Pkmyt1	All_Gio
ENSMUSG00000044906	1774.38	-0.140153	0.121566	0.0677302	0.313824	4930503L19Rik	All_Gio
ENSMUSG00000032264	5092.1	0.111588	0.076614	0.069746	0.319872	Zw10	All_Gio
ENSMUSG00000032397	18844.1	-0.136764	0.116603	0.0700498	0.320589	Tipin	All_Gio
ENSMUSG00000031878	3597.07	-0.138162	0.129084	0.0723127	0.326128	Nae1	All_Gio
ENSMUSG00000033970	7661.03	-0.129455	0.108942	0.0740613	0.330056	Rfc3	All_Gio
ENSMUSG00000055884	849.898	0.138143	0.144556	0.0747752	0.33173	Fancm	All_Gio
ENSMUSG00000024590	27369.1	0.137491	0.128246	0.074979	0.33241	Lmnb1	All_Gio
ENSMUSG00000051220	5852.59	0.111788	0.0783554	0.0752765	0.333028	Ercc6l	All_Gio
ENSMUSG00000037103	1844.02	0.129374	0.106884	0.0759313	0.334717	Dcaf15	All_Gio
ENSMUSG00000027752	7987.96	-0.109594	0.0775223	0.0769109	0.33638	Exosc8	All_Gio
ENSMUSG00000048668	1898.36	0.106404	0.0735409	0.0769405	0.33638	Rhno1	All_Gio
ENSMUSG00000044934	3875.17	0.13675	0.127793	0.0796814	0.341439	Zfp367	All_Gio
ENSMUSG00000022471	19919.1	-0.0893816	0.0576108	0.0799344	0.341632	Xrcc6	All_Gio
ENSMUSG00000038482	28053	0.100458	0.0706156	0.0829914	0.346921	Tfdp1	All_Gio
ENSMUSG00000026281	7765.32	-0.0859306	0.057632	0.0847226	0.35066	Dtymk	All_Gio
ENSMUSG00000058290	4172.02	0.132981	0.134498	0.0850151	0.351426	Espl1	All_Gio
ENSMUSG00000072980	3426.05	-0.126113	0.140707	0.0894156	0.360839	Oip5	All_Gio
ENSMUSG00000027160	1369.22	-0.123358	0.115648	0.091368	0.364476	Ccdc34	All_Gio
ENSMUSG00000066979	25969.1	-0.08631	0.0628099	0.0933162	0.369222	Bub3	All_Gio
ENSMUSG00000028033	318.36	0.112902	0.155529	0.0955224	0.37303	Kcnq5	All_Gio
ENSMUSG00000028044	14823	-0.0740182	0.0528216	0.0956279	0.37321	Cks1b	All_Gio
ENSMUSG00000026374	8441.09	-0.0807349	0.0602833	0.0958027	0.373571	Tsn	All_Gio
ENSMUSG00000020330	9690.69	-0.0927201	0.0656869	0.0968277	0.376454	Hmmr	All_Gio
ENSMUSG00000033752	972.835	0.123418	0.117704	0.0970006	0.376793	Mnd1	All_Gio
ENSMUSG00000042462	3938.37	-0.119116	0.106042	0.0973789	0.377705	Dctpp1	All_Gio
ENSMUSG00000027654	1512.48	-0.122277	0.131171	0.0997102	0.382803	Fam83d	All_Gio
ENSMUSG00000029247	35281.1	-0.115984	0.105024	0.101241	0.385646	Paics	All_Gio
ENSMUSG00000001228	40932.2	0.10466	0.0813476	0.103234	0.389858	Uhrf1	All_Gio
ENSMUSG00000031922	5994.86	-0.118233	0.106468	0.105227	0.393214	Cep57	All_Gio
ENSMUSG00000029676	3737.48	-0.096153	0.0725415	0.105736	0.393776	Pot1a	All_Gio
ENSMUSG00000054309	9463.36	-0.0942395	0.0694761	0.105591	0.393776	Cpsf3	All_Gio
ENSMUSG00000027959	1200.11	-0.117185	0.123398	0.109195	0.399726	Sass6	All_Gio
ENSMUSG00000024301	284.27	0.112326	0.142381	0.110628	0.401825	Kifc5b	All_Gio
ENSMUSG00000027067	37726.3	-0.0754155	0.0568197	0.11147	0.402989	Ssrp1	All_Gio
ENSMUSG00000010517	7320.54	-0.0856172	0.0598328	0.112036	0.403558	Faf1	All_Gio
ENSMUSG00000022422	2178.69	-0.113027	0.10725	0.112156	0.403558	Dscc1	All_Gio
ENSMUSG00000034192	3369.17	-0.108244	0.0941202	0.112191	0.403558	Lsm3	All_Gio
ENSMUSG00000033405	419.959	-0.111494	0.141716	0.11232	0.40391	Nudt15	All_Gio
ENSMUSG00000028693	10493.8	-0.0924985	0.0708501	0.112975	0.40494	Nasp	All_Gio
ENSMUSG00000055660	1687.92	0.108425	0.09579	0.114667	0.407007	Mettl4	All_Gio
ENSMUSG00000008822	1047.4	-0.115422	0.120265	0.115333	0.407927	Acyp1	All_Gio
ENSMUSG00000039187	2826.14	0.104586	0.0896188	0.115185	0.407927	Fanci	All_Gio
ENSMUSG00000032586	3672.69	0.0832409	0.0605148	0.116533	0.409777	Traip	All_Gio
ENSMUSG00000036023	6653.71	-0.108202	0.09536	0.116917	0.410468	Parp2	All_Gio
ENSMUSG00000049539	371.995	-0.102216	0.144072	0.12085	0.415833	Hist1h1a	All_Gio
ENSMUSG00000020649	75909.6	0.101669	0.0952538	0.121582	0.417274	Rrm2	All_Gio
ENSMUSG00000020492	2366.73	-0.111535	0.118343	0.121894	0.41778	Ska2	All_Gio
ENSMUSG00000021714	4633.82	-0.107887	0.1365	0.123854	0.421373	Cenpk	All_Gio
ENSMUSG00000023942	9207.02	-0.101092	0.0817776	0.12434	0.422134	Slc29a1	All_Gio
ENSMUSG00000038644	26203.5	0.100661	0.0808079	0.124477	0.422272	Pold1	All_Gio
ENSMUSG00000036875	4843.17	0.089884	0.0716351	0.124917	0.422676	Dna2	All_Gio
ENSMUSG00000044783	14068.6	0.102605	0.0963213	0.1257	0.424213	Hjurp	All_Gio
ENSMUSG00000017146	3134.68	0.108047	0.119526	0.128026	0.42825	Brca1	All_Gio
ENSMUSG00000025630	24359.2	-0.0994181	0.091097	0.128487	0.429355	Hprt	All_Gio
ENSMUSG00000034024	15079.2	-0.0877119	0.0712479	0.132639	0.435173	Cct2	All_Gio
ENSMUSG00000021569	6223.94	-0.0875427	0.0715018	0.133829	0.4374	Trip13	All_Gio
ENSMUSG00000033904	1969.17	0.10456	0.128298	0.136252	0.44131	Ccp110	All_Gio
ENSMUSG00000061286	3021.77	-0.0964849	0.0857388	0.139627	0.445574	Exosc5	All_Gio
ENSMUSG00000023953	1276.19	0.105033	0.117815	0.139805	0.445589	Polh	All_Gio
ENSMUSG00000037725	5359.37	-0.0946933	0.0909874	0.140819	0.447307	Ckap2	All_Gio
ENSMUSG00000019952	2601.02	-0.10266	0.0973801	0.141073	0.447526	Poc1b	All_Gio
ENSMUSG00000022024	2998.78	-0.0895864	0.0754052	0.141367	0.447644	Sugt1	All_Gio
ENSMUSG00000020974	2041.85	-0.108653	0.0998503	0.142519	0.449684	Pole2	All_Gio
ENSMUSG00000026709	5557.54	-0.0876662	0.074707	0.145001	0.453484	Dars2	All_Gio
ENSMUSG00000022369	1874.88	-0.0999307	0.0984327	0.145139	0.453592	Mtbp	All_Gio
ENSMUSG00000068744	1309.2	0.0988604	0.0966325	0.145434	0.454086	Psrc1	All_Gio
ENSMUSG00000031371	2927.97	-0.086889	0.0762955	0.146435	0.455561	Haus7	All_Gio
ENSMUSG00000028282	3961.31	0.101278	0.108075	0.14741	0.457868	Casp8ap2	All_Gio
ENSMUSG00000052926	4162.97	-0.0828745	0.0691113	0.148239	0.458874	Rnaseh2a	All_Gio
ENSMUSG00000039298	1471.74	-0.099937	0.106911	0.148493	0.459067	Cdk5rap2	All_Gio
ENSMUSG00000029430	74956	-0.0904728	0.0812905	0.150346	0.461655	Ran	All_Gio
ENSMUSG00000023004	41713.3	-0.0753475	0.0616547	0.154178	0.46829	Tuba1b	All_Gio
ENSMUSG00000042079	43323.5	-0.088903	0.0875245	0.155543	0.470378	Hnrnpf	All_Gio
ENSMUSG00000026134	5927.25	-0.092325	0.0871332	0.155702	0.470534	Prim2	All_Gio
ENSMUSG00000048327	10095.9	0.0718331	0.0580922	0.159491	0.477623	Ckap2l	All_Gio
ENSMUSG00000006715	8675.4	-0.0885338	0.0849904	0.166169	0.487626	Gmnn	All_Gio
ENSMUSG00000027353	2621.47	0.0878937	0.0833008	0.167619	0.490194	Mcm8	All_Gio
ENSMUSG00000044678	98.2316	0.0519891	0.130312	0.169869	0.495175	Ly6k	All_Gio
ENSMUSG00000032498	3551.8	-0.0811452	0.082641	0.171468	0.496999	Mlh1	All_Gio
ENSMUSG00000040331	18201.3	-0.0899757	0.0887377	0.176095	0.50332	Nsmce4a	All_Gio
ENSMUSG00000024742	59.1624	0.0557344	0.130228	0.176644	0.503997	Fen1	All_Gio
ENSMUSG00000045751	3831.85	-0.088285	0.0902623	0.177686	0.505985	Mms22l	All_Gio
ENSMUSG00000047044	2042.04	-0.0897875	0.092334	0.177852	0.506239	D030056L22Rik	All_Gio
ENSMUSG00000020794	7905.54	-0.093555	0.105715	0.179308	0.507716	Ube2g1	All_Gio
ENSMUSG00000028453	2097.48	0.0813235	0.076207	0.179776	0.508202	Fancg	All_Gio
ENSMUSG00000068101	3810.2	0.0897219	0.0942745	0.18215	0.51151	Cenpm	All_Gio
ENSMUSG00000002870	35087.1	0.0701894	0.0620576	0.183729	0.513122	Mcm2	All_Gio
ENSMUSG00000037474	12394.6	0.0863727	0.0975677	0.184144	0.513122	Dtl	All_Gio
ENSMUSG00000038252	18200.1	0.0893414	0.0806858	0.188156	0.518226	Ncapd2	All_Gio
ENSMUSG00000021461	1138.06	-0.0819132	0.0798866	0.18965	0.519722	Fancc	All_Gio
ENSMUSG00000019715	6371.83	-0.0602009	0.0507564	0.190157	0.520356	Gle1	All_Gio
ENSMUSG00000028394	5778.52	-0.0790478	0.080643	0.193108	0.524076	Pole3	All_Gio
ENSMUSG00000026646	1055.07	0.0874451	0.100872	0.195639	0.526423	Suv39h2	All_Gio
ENSMUSG00000002748	5656.53	0.0880147	0.105151	0.196256	0.527344	Baz1b	All_Gio
ENSMUSG00000040520	901.235	-0.0726884	0.130256	0.198532	0.529217	Manea	All_Gio
ENSMUSG00000075470	369.439	0.0749936	0.128984	0.200967	0.532946	Alg10b	All_Gio
ENSMUSG00000007080	4822.82	0.0946118	0.117809	0.2042	0.537784	Pole	All_Gio
ENSMUSG00000027285	2850.17	-0.0831847	0.0903497	0.204115	0.537784	Haus2	All_Gio
ENSMUSG00000024660	12918.8	-0.0723679	0.0750408	0.20797	0.543046	Incenp	All_Gio
ENSMUSG00000028832	89660.1	-0.0754751	0.0832515	0.215794	0.551991	Stmn1	All_Gio
ENSMUSG00000022070	4621.01	-0.0724437	0.079477	0.216156	0.552381	Bora	All_Gio
ENSMUSG00000021177	5224.73	-0.0696739	0.0678198	0.21634	0.552596	Tdp1	All_Gio
ENSMUSG00000019992	2337.26	-0.0809526	0.0967699	0.222733	0.559803	Mtfr2	All_Gio
ENSMUSG00000020895	1113.5	0.0731799	0.0739842	0.222842	0.559803	Tmem107	All_Gio
ENSMUSG00000022234	43830.5	-0.075725	0.080006	0.226955	0.564432	Cct5	All_Gio
ENSMUSG00000021615	595.497	-0.080318	0.108885	0.227705	0.564863	Xrcc4	All_Gio
ENSMUSG00000026496	38479.2	0.0620122	0.0633868	0.228964	0.56601	Parp1	All_Gio
ENSMUSG00000021485	3568.88	0.0760781	0.0834219	0.229269	0.566291	Mxd3	All_Gio
ENSMUSG00000003778	14889.9	0.0661564	0.0624753	0.23009	0.56656	Brd8	All_Gio
ENSMUSG00000023919	3615.61	-0.0789262	0.0921144	0.231849	0.569237	Cenpq	All_Gio
ENSMUSG00000050410	6824.43	0.0797771	0.0940719	0.2332	0.570478	Tcf19	All_Gio
ENSMUSG00000022678	9820.48	-0.0668404	0.0708713	0.235123	0.571432	Nde1	All_Gio
ENSMUSG00000069308	33.7906	-0.0398683	0.124997	0.237301	0.574452	Hist1h2bp	All_Gio
ENSMUSG00000032400	1689.65	-0.0717856	0.076989	0.237492	0.574525	Zwilch	All_Gio
ENSMUSG00000057110	4826.62	0.0760656	0.0884877	0.238065	0.575549	Cntrl	All_Gio
ENSMUSG00000039509	7015.77	0.0544927	0.0515711	0.238712	0.57655	Nup133	All_Gio
ENSMUSG00000021707	5206.86	-0.0763188	0.0871485	0.23897	0.576794	Dhfr	All_Gio
ENSMUSG00000004018	1415.33	-0.0751715	0.0869099	0.239624	0.577201	Fancl	All_Gio
ENSMUSG00000022673	29813.5	0.0688119	0.0727114	0.241509	0.579136	Mcm4	All_Gio
ENSMUSG00000060639	410.849	-0.077069	0.0997248	0.245453	0.58402	Hist1h4i	All_Gio
ENSMUSG00000072082	13287.1	0.0607809	0.0607366	0.248476	0.586723	Ccnf	All_Gio
ENSMUSG00000028896	11393.4	-0.0599658	0.060484	0.25204	0.590694	Rcc1	All_Gio
ENSMUSG00000014074	2760.21	0.0752706	0.106028	0.254362	0.593706	Rnf168	All_Gio
ENSMUSG00000022385	5328.69	0.0651495	0.0703747	0.254993	0.594547	Gtse1	All_Gio
ENSMUSG00000023066	851.749	0.0647663	0.123834	0.256345	0.5961	Rttn	All_Gio
ENSMUSG00000037313	21504.3	-0.0654099	0.0725558	0.257691	0.596197	Tacc3	All_Gio
ENSMUSG00000033952	3457.05	0.0723044	0.108281	0.260472	0.599388	Aspm	All_Gio
ENSMUSG00000031691	1097.07	0.0724816	0.111554	0.261213	0.599446	Tnpo2	All_Gio
ENSMUSG00000036672	1625.85	0.0729487	0.105075	0.26089	0.599446	Cenpt	All_Gio
ENSMUSG00000012443	26860.7	0.081601	0.100192	0.261533	0.59956	Kif11	All_Gio
ENSMUSG00000028551	4081.28	0.074496	0.0973987	0.261603	0.59956	Cdkn2c	All_Gio
ENSMUSG00000028619	893.426	0.0722221	0.0919511	0.264667	0.60227	Tceanc2	All_Gio
ENSMUSG00000029414	3104.73	0.0715921	0.117527	0.267694	0.605791	Kntc1	All_Gio
ENSMUSG00000037846	1016.49	0.0711477	0.0903278	0.269521	0.607935	Rtkn2	All_Gio
ENSMUSG00000026622	8043.28	0.0554124	0.0569293	0.270084	0.60852	Nek2	All_Gio
ENSMUSG00000027845	921.826	0.0723683	0.0969812	0.272684	0.611242	Dclre1b	All_Gio
ENSMUSG00000040034	2795.94	-0.0750722	0.0936213	0.272659	0.611242	Nup43	All_Gio
ENSMUSG00000024817	5553.34	-0.0686867	0.0878794	0.277722	0.615451	Uhrf2	All_Gio
ENSMUSG00000061533	1917.06	0.0710913	0.0986491	0.278138	0.615451	Cep128	All_Gio
ENSMUSG00000031669	2286.46	0.0708335	0.0981316	0.281841	0.618819	Gins3	All_Gio
ENSMUSG00000017861	8476.72	0.0661247	0.0672962	0.283175	0.619753	Mybl2	All_Gio
ENSMUSG00000029715	1551.84	-0.0676834	0.0883559	0.284824	0.621007	Pop7	All_Gio
ENSMUSG00000002068	4364.73	0.0635071	0.0773383	0.286372	0.62275	Ccne1	All_Gio
ENSMUSG00000060288	3894.1	-0.0653619	0.0828965	0.286294	0.62275	Ppih	All_Gio
ENSMUSG00000069135	5616.96	-0.0644791	0.0747057	0.286597	0.622941	Fgfr1op	All_Gio
ENSMUSG00000032555	8487.69	0.0743914	0.0976731	0.287982	0.62371	Topbp1	All_Gio
ENSMUSG00000027203	12305.8	-0.0587291	0.0648546	0.288618	0.624233	Dut	All_Gio
ENSMUSG00000041491	2845.52	-0.0622079	0.0730756	0.290497	0.626289	Cep78	All_Gio
ENSMUSG00000043872	1253.78	0.068567	0.0933225	0.291262	0.626661	Zmym1	All_Gio
ENSMUSG00000024370	7289.53	-0.0593138	0.067135	0.292128	0.627571	Cdc23	All_Gio
ENSMUSG00000038215	1300.08	-0.0669845	0.100638	0.295528	0.631406	Cep44	All_Gio
ENSMUSG00000018809	1371.13	0.0632941	0.0800497	0.300934	0.634832	Smyd4	All_Gio
ENSMUSG00000021902	1080.58	0.0666815	0.0910301	0.304383	0.63771	Phf7	All_Gio
ENSMUSG00000008690	16075.4	-0.0566757	0.0697119	0.311728	0.644007	Ncaph2	All_Gio
ENSMUSG00000020808	8785.99	0.0645205	0.085474	0.312037	0.644198	Pimreg	All_Gio
ENSMUSG00000038383	4250.35	-0.0601784	0.0743496	0.312396	0.644656	Pigu	All_Gio
ENSMUSG00000020268	460.465	-0.0654877	0.0932168	0.312721	0.644979	Lyrm7	All_Gio
ENSMUSG00000044201	2648.24	-0.0627836	0.0868563	0.313056	0.645129	Cdc25c	All_Gio
ENSMUSG00000037905	2320.46	-0.0607112	0.0768329	0.314236	0.646427	Bri3bp	All_Gio
ENSMUSG00000037461	8184.26	0.0639254	0.0870159	0.314773	0.64704	Ints7	All_Gio
ENSMUSG00000052533	3343.75	0.0653246	0.100579	0.318062	0.649131	Nup188	All_Gio
ENSMUSG00000079555	6248.07	-0.0648732	0.0973579	0.318665	0.649755	Haus3	All_Gio
ENSMUSG00000032815	1428.74	0.0620253	0.0828641	0.318935	0.649908	Fanca	All_Gio
ENSMUSG00000027811	4050.17	-0.0620695	0.0868889	0.32058	0.651243	4930579G24Rik	All_Gio
ENSMUSG00000054717	94656.4	0.0619331	0.0827272	0.32158	0.652871	Hmgb2	All_Gio
ENSMUSG00000014606	6288.4	-0.0568743	0.0695791	0.323882	0.654922	Slc25a11	All_Gio
ENSMUSG00000026434	9136.67	0.0629418	0.0870438	0.324052	0.655165	Nucks1	All_Gio
ENSMUSG00000051378	7692.75	0.0494995	0.0577332	0.326609	0.657613	Kif18b	All_Gio
ENSMUSG00000020697	2032.96	0.0643231	0.104265	0.328004	0.659009	Lig3	All_Gio
ENSMUSG00000034601	1714.57	-0.0611167	0.0848242	0.32811	0.659009	2700049A03Rik	All_Gio
ENSMUSG00000025872	6170.49	-0.0586155	0.0771145	0.332422	0.66328	Thoc3	All_Gio
ENSMUSG00000021965	4015.23	-0.0617381	0.0843114	0.333039	0.664074	Ska3	All_Gio
ENSMUSG00000036022	1073.22	-0.0634281	0.0975548	0.334582	0.664902	Fam122b	All_Gio
ENSMUSG00000029466	3859.82	-0.0562905	0.0726037	0.336312	0.667055	Anapc7	All_Gio
ENSMUSG00000033036	103.156	-0.0551211	0.116221	0.336592	0.667208	Gm7879	All_Gio
ENSMUSG00000027823	11363.7	-0.0578673	0.0773505	0.338111	0.668466	Gmps	All_Gio
ENSMUSG00000041859	43191.6	0.0528154	0.067298	0.337947	0.668466	Mcm3	All_Gio
ENSMUSG00000025646	1327.64	0.059453	0.0843663	0.34023	0.669793	Atrip	All_Gio
ENSMUSG00000022314	13465	0.0774545	0.0860956	0.342506	0.671613	Rad21	All_Gio
ENSMUSG00000025742	9600.59	-0.0568228	0.0894237	0.34541	0.673902	Prps2	All_Gio
ENSMUSG00000024833	9943	0.0563381	0.0727943	0.349372	0.677656	Pola2	All_Gio
ENSMUSG00000058729	2273.72	-0.0605842	0.0891901	0.350768	0.678805	Lin9	All_Gio
ENSMUSG00000064128	1577.95	-0.0593162	0.0961303	0.351768	0.679265	Cenpj	All_Gio
ENSMUSG00000039048	3694.06	-0.0503552	0.0606726	0.351897	0.679355	Foxred1	All_Gio
ENSMUSG00000068854	818.596	0.0597583	0.0989197	0.353623	0.680792	Hist2h2be	All_Gio
ENSMUSG00000031546	4593.36	-0.0521357	0.0809548	0.353846	0.680962	Gins4	All_Gio
ENSMUSG00000032477	4120.05	0.0536988	0.0707681	0.35468	0.681829	Cdc25a	All_Gio
ENSMUSG00000028438	933.486	0.0584526	0.105152	0.358258	0.684899	Kif24	All_Gio
ENSMUSG00000035024	8993.42	0.0581779	0.088289	0.359485	0.686261	Ncapd3	All_Gio
ENSMUSG00000027018	14128.1	-0.0578057	0.0893556	0.359972	0.686494	Hat1	All_Gio
ENSMUSG00000003868	11248.1	-0.057935	0.0914963	0.362458	0.689009	Ruvbl2	All_Gio
ENSMUSG00000042029	8888.31	0.0506255	0.11333	0.362802	0.689109	Ncapg2	All_Gio
ENSMUSG00000020171	2824.31	-0.0536158	0.0755082	0.364965	0.690718	Yeats4	All_Gio
ENSMUSG00000005233	13315.7	-0.0566241	0.0903789	0.366559	0.692342	Spc25	All_Gio
ENSMUSG00000027323	10911.9	-0.0545382	0.0818967	0.368319	0.693969	Rad51	All_Gio
ENSMUSG00000003779	10414.7	0.0356065	0.0488991	0.37475	0.69853	Kif20a	All_Gio
ENSMUSG00000025758	8376.31	0.054238	0.0653659	0.374725	0.69853	Plk4	All_Gio
ENSMUSG00000099517	54.0885	-0.0330036	0.120958	0.373977	0.69853	Hist1h3g	All_Gio
ENSMUSG00000029790	1455.11	-0.0516674	0.0719164	0.375696	0.698585	Cep41	All_Gio
ENSMUSG00000032218	19857.3	-0.0530283	0.0774527	0.37969	0.70097	Ccnb2	All_Gio
ENSMUSG00000025154	3316.21	0.0534014	0.10814	0.380476	0.701828	Arhgap19	All_Gio
ENSMUSG00000005370	10758.9	0.0775781	0.0959476	0.3815	0.702438	Msh6	All_Gio
ENSMUSG00000028629	1690.96	-0.0536718	0.0861112	0.383714	0.704937	Exo5	All_Gio
ENSMUSG00000028484	11898.4	-0.0562276	0.0834309	0.384297	0.705518	Psip1	All_Gio
ENSMUSG00000030322	1952.9	0.0518351	0.0847319	0.385874	0.706739	Mbd4	All_Gio
ENSMUSG00000046591	1546.85	0.0543823	0.101881	0.3879	0.707841	Ticrr	All_Gio
ENSMUSG00000052565	538.536	-0.0487144	0.112034	0.388264	0.708162	Hist1h1d	All_Gio
ENSMUSG00000020392	10537	-0.0496276	0.0721326	0.388822	0.708422	Cdkn2aipnl	All_Gio
ENSMUSG00000041712	5389.04	0.0492099	0.0753364	0.391099	0.709797	Ubr7	All_Gio
ENSMUSG00000025001	9354.77	-0.0562122	0.0972929	0.391797	0.710281	Hells	All_Gio
ENSMUSG00000037894	93606.5	-0.0522171	0.0794765	0.391783	0.710281	H2afz	All_Gio
ENSMUSG00000022322	13739.4	-0.0520079	0.0851545	0.393263	0.711718	Shcbp1	All_Gio
ENSMUSG00000024054	5474.21	0.0499396	0.109281	0.393346	0.711718	Smchd1	All_Gio
ENSMUSG00000035293	2699.79	-0.0525848	0.106384	0.393602	0.711984	G2e3	All_Gio
ENSMUSG00000051329	6719.47	-0.0524923	0.106465	0.399221	0.717042	Nup160	All_Gio
ENSMUSG00000026873	981.596	0.0527278	0.0993722	0.399596	0.717353	Phf19	All_Gio
ENSMUSG00000024791	7725.2	0.0484559	0.0706819	0.402003	0.718407	Cdca5	All_Gio
ENSMUSG00000028018	361.549	0.0481922	0.109898	0.406235	0.721758	Gstcd	All_Gio
ENSMUSG00000026779	1496.99	-0.0526196	0.0964213	0.407112	0.722312	Mastl	All_Gio
ENSMUSG00000046111	971.515	0.0510611	0.102882	0.407983	0.722798	Cep295	All_Gio
ENSMUSG00000016757	2742.83	0.050599	0.082849	0.410236	0.724751	Ttll12	All_Gio
ENSMUSG00000025574	7970.97	-0.0495205	0.0803445	0.415905	0.728889	Tk1	All_Gio
ENSMUSG00000048170	11443.6	-0.0403709	0.0557169	0.415996	0.728889	Mcmbp	All_Gio
ENSMUSG00000028884	15291.2	0.0495372	0.084931	0.417277	0.72986	Rpa2	All_Gio
ENSMUSG00000038379	5593.5	-0.04815	0.0802019	0.423092	0.734518	Ttk	All_Gio
ENSMUSG00000007050	4466.54	-0.0428785	0.0637313	0.427991	0.737631	Lsm2	All_Gio
ENSMUSG00000066878	690.786	-0.0486155	0.10133	0.429731	0.739279	Gm10184	All_Gio
ENSMUSG00000042699	3014.68	0.0443071	0.101189	0.435654	0.743896	Dhx9	All_Gio
ENSMUSG00000051768	5910.81	0.0433954	0.0732291	0.441919	0.748422	Xrcc1	All_Gio
ENSMUSG00000028614	6375.13	0.0489156	0.0993021	0.442057	0.748559	Ndc1	All_Gio
ENSMUSG00000028560	16030.1	0.0444098	0.0726083	0.445757	0.750971	Usp1	All_Gio
ENSMUSG00000040667	9208.69	-0.0394489	0.0707146	0.445547	0.750971	Nup88	All_Gio
ENSMUSG00000022960	2441.35	-0.0486766	0.0904717	0.446276	0.75139	Donson	All_Gio
ENSMUSG00000055612	31669.4	-0.042607	0.0676939	0.449135	0.754052	Cdca7	All_Gio
ENSMUSG00000006398	22368.4	-0.0454602	0.0789531	0.455479	0.758914	Cdc20	All_Gio
ENSMUSG00000015880	12467.1	-0.0446604	0.0866915	0.45573	0.758914	Ncapg	All_Gio
ENSMUSG00000035198	6364.56	-0.0409747	0.0836098	0.458009	0.760551	Tubg1	All_Gio
ENSMUSG00000029687	17036.5	0.0417432	0.0685916	0.458623	0.76088	Ezh2	All_Gio
ENSMUSG00000047757	1512.36	-0.049878	0.102564	0.460942	0.762958	Fancb	All_Gio
ENSMUSG00000028212	8410.6	0.0498971	0.10441	0.461259	0.763191	Ccne2	All_Gio
ENSMUSG00000026239	2643.57	-0.0370352	0.0855525	0.461833	0.763886	Pde6d	All_Gio
ENSMUSG00000020527	285.135	-0.0377604	0.114161	0.462579	0.764543	Myo19	All_Gio
ENSMUSG00000096472	6382.01	0.0458098	0.0864879	0.46324	0.764965	Cdkn2d	All_Gio
ENSMUSG00000028333	30629.5	-0.040212	0.0698898	0.466259	0.766453	Anp32b	All_Gio
ENSMUSG00000059119	16761.9	0.0366095	0.0567729	0.466127	0.766453	Nap1l4	All_Gio
ENSMUSG00000027342	43767.2	-0.0414646	0.082822	0.469615	0.768765	Pcna	All_Gio
ENSMUSG00000020493	2025.62	0.0452709	0.0919715	0.47074	0.769428	Prr11	All_Gio
ENSMUSG00000028587	1332.8	-0.0441338	0.084842	0.471203	0.769625	Orc1	All_Gio
ENSMUSG00000042590	6532.9	-0.0449133	0.0937752	0.471452	0.769782	Ipo11	All_Gio
ENSMUSG00000022881	9582.9	-0.0423936	0.0808237	0.47393	0.771879	Rfc4	All_Gio
ENSMUSG00000027635	3353.76	0.0426784	0.0742425	0.474901	0.772542	Dsn1	All_Gio
ENSMUSG00000035842	2364.1	-0.0431151	0.0763983	0.474854	0.772542	Ddx11	All_Gio
ENSMUSG00000071078	45.0527	-0.0300625	0.117015	0.480204	0.77503	Nr2c2ap	All_Gio
ENSMUSG00000032254	10055	-0.0388053	0.0674564	0.480491	0.775281	Kif23	All_Gio
ENSMUSG00000034329	4142.27	0.0433814	0.0856945	0.481385	0.775773	Brip1	All_Gio
ENSMUSG00000021391	1098.58	-0.0413578	0.103047	0.487387	0.778432	Cenpp	All_Gio
ENSMUSG00000023104	14430.2	-0.0410253	0.0730853	0.486829	0.778432	Rfc2	All_Gio
ENSMUSG00000001436	5119.1	-0.041814	0.0804693	0.488049	0.778798	Slc19a1	All_Gio
ENSMUSG00000041406	3461.41	0.0423182	0.0744416	0.48915	0.779611	BC055324	All_Gio
ENSMUSG00000006728	34569.9	-0.0409066	0.076923	0.490026	0.780089	Cdk4	All_Gio
ENSMUSG00000034349	30811.8	-0.0532726	0.0982538	0.491708	0.780948	Smc4	All_Gio
ENSMUSG00000027699	9900.43	-0.0403474	0.0890715	0.495148	0.782594	Ect2	All_Gio
ENSMUSG00000033031	6868.17	-0.041478	0.0845564	0.496697	0.783395	C330027C09Rik	All_Gio
ENSMUSG00000032783	1736.55	-0.0401588	0.0768291	0.501496	0.786384	Troap	All_Gio
ENSMUSG00000062822	2263.1	0.0422036	0.0809725	0.502947	0.787028	4833420G17Rik	All_Gio
ENSMUSG00000026039	726.063	-0.0412263	0.0941467	0.505486	0.788418	Sgo2a	All_Gio
ENSMUSG00000034311	6158.28	0.0413503	0.0810525	0.506707	0.788982	Kif4	All_Gio
ENSMUSG00000026708	4597.86	-0.0399804	0.0816883	0.511085	0.792553	Cenpl	All_Gio
ENSMUSG00000040044	7733.58	-0.03618	0.0722714	0.513785	0.793719	Orc3	All_Gio
ENSMUSG00000026790	7245.18	0.0326737	0.0576554	0.5178	0.796452	Odf2	All_Gio
ENSMUSG00000004880	45083.2	0.0432923	0.074287	0.518963	0.796906	Lbr	All_Gio
ENSMUSG00000000028	8516.81	0.0352029	0.0669948	0.522181	0.799101	Cdc45	All_Gio
ENSMUSG00000032782	1407.22	-0.0392474	0.085453	0.52302	0.799512	Cntrob	All_Gio
ENSMUSG00000038759	8145.44	0.0352119	0.107582	0.525595	0.801161	Nup205	All_Gio
ENSMUSG00000027242	715.003	0.0392352	0.0964085	0.526181	0.801869	Wdr76	All_Gio
ENSMUSG00000033762	934.271	0.0389807	0.0914585	0.529179	0.803915	Recql4	All_Gio
ENSMUSG00000017716	15920.6	-0.0300556	0.0559661	0.531922	0.80615	Birc5	All_Gio
ENSMUSG00000026960	3591.68	-0.0354524	0.10599	0.533127	0.806665	Arl6ip6	All_Gio
ENSMUSG00000042489	1725.89	-0.0373633	0.0885334	0.533765	0.807016	Clspn	All_Gio
ENSMUSG00000022429	86.9187	-0.0258616	0.116022	0.536819	0.808518	Dmc1	All_Gio
ENSMUSG00000027490	2996.47	0.0341384	0.0679555	0.538919	0.80896	E2f1	All_Gio
ENSMUSG00000078773	2134.52	0.0327819	0.0616085	0.538975	0.80896	Rad54b	All_Gio
ENSMUSG00000031697	6073.87	-0.0354758	0.0736967	0.540656	0.80941	Orc6	All_Gio
ENSMUSG00000029003	1852.5	-0.0358692	0.0741219	0.541972	0.810046	Mad2l2	All_Gio
ENSMUSG00000040084	25148	0.0408258	0.0611239	0.542202	0.810046	Bub1b	All_Gio
ENSMUSG00000051627	1392.69	-0.0353116	0.103124	0.54465	0.811432	Hist1h1e	All_Gio
ENSMUSG00000036202	6258.92	0.0383782	0.0976016	0.545726	0.812553	Rif1	All_Gio
ENSMUSG00000021048	11713.4	-0.0371078	0.0868815	0.546576	0.812704	Mthfd1	All_Gio
ENSMUSG00000031756	6312.18	-0.034383	0.0725599	0.546614	0.812704	Cenpn	All_Gio
ENSMUSG00000024260	868.855	0.0374545	0.0899665	0.549056	0.813946	Sap130	All_Gio
ENSMUSG00000027469	16633.7	0.0218021	0.0384863	0.54974	0.81413	Tpx2	All_Gio
ENSMUSG00000020185	1762.85	0.0369316	0.0895887	0.55142	0.814365	E2f7	All_Gio
ENSMUSG00000020471	10629.5	-0.0339236	0.084145	0.556649	0.816444	Pold2	All_Gio
ENSMUSG00000005470	26836.6	0.035551	0.0863804	0.557777	0.81679	Asf1b	All_Gio
ENSMUSG00000030641	1981.46	0.0362833	0.0882006	0.562742	0.819748	Ddias	All_Gio
ENSMUSG00000073542	2070.42	0.0357515	0.0908537	0.563408	0.820107	Cep76	All_Gio
ENSMUSG00000027379	11947.8	-0.0278049	0.0659973	0.564135	0.820696	Bub1	All_Gio
ENSMUSG00000024258	3972.22	-0.0351288	0.0790926	0.566651	0.82118	Polr2d	All_Gio
ENSMUSG00000041498	609.634	0.0360123	0.0938372	0.566809	0.82118	Kif14	All_Gio
ENSMUSG00000035726	5655.26	0.0346181	0.0834606	0.568266	0.822077	Supt16	All_Gio
ENSMUSG00000038047	3059.13	-0.0345889	0.0833882	0.568258	0.822077	Haus6	All_Gio
ENSMUSG00000035310	2543.88	0.0342599	0.089259	0.575667	0.827152	Lin54	All_Gio
ENSMUSG00000030662	11936.6	0.0355466	0.0914603	0.582351	0.830508	Ipo5	All_Gio
ENSMUSG00000059409	6180.61	0.0319727	0.0584202	0.58558	0.832466	Ppp2r5d	All_Gio
ENSMUSG00000019773	12386.1	-0.0314362	0.0735504	0.591115	0.83598	Fbxo5	All_Gio
ENSMUSG00000019988	3688.92	-0.0325329	0.0819479	0.592037	0.836534	Nedd1	All_Gio
ENSMUSG00000040549	10869.5	0.0322066	0.0974664	0.595107	0.838982	Ckap5	All_Gio
ENSMUSG00000037544	7915.03	-0.0259443	0.0550079	0.595321	0.839016	Dlgap5	All_Gio
ENSMUSG00000041133	15139.6	0.0277615	0.0559121	0.600969	0.840859	Smc1a	All_Gio
ENSMUSG00000051235	1845.09	-0.0297684	0.0997821	0.603762	0.843066	Gen1	All_Gio
ENSMUSG00000027424	1551.9	0.0269713	0.0595683	0.605496	0.844324	Mgme1	All_Gio
ENSMUSG00000026999	2996.63	-0.0309772	0.0887251	0.612925	0.848318	Nup35	All_Gio
ENSMUSG00000029191	8165.64	0.0269156	0.0654384	0.613172	0.848318	Rfc1	All_Gio
ENSMUSG00000060981	19.9025	-0.0139012	0.118733	0.613167	0.848318	Hist1h4h	All_Gio
ENSMUSG00000035367	1625.5	0.0311062	0.0874904	0.615075	0.849232	Rmi1	All_Gio
ENSMUSG00000038010	1202.83	0.0306251	0.0969576	0.617203	0.850567	Ccdc138	All_Gio
ENSMUSG00000043065	1307.83	0.0317749	0.0850268	0.61757	0.850666	Spice1	All_Gio
ENSMUSG00000021697	3849.43	-0.0303081	0.0742484	0.618904	0.851575	Depdc1b	All_Gio
ENSMUSG00000030346	5994.86	-0.0297743	0.0809992	0.620352	0.852341	Rad51ap1	All_Gio
ENSMUSG00000063172	259.874	-0.029417	0.0963941	0.620539	0.852341	Hspb11	All_Gio
ENSMUSG00000027326	6177.71	0.0301284	0.100302	0.620735	0.852363	Knl1	All_Gio
ENSMUSG00000002055	7870.05	0.0289954	0.0572308	0.621755	0.85264	Spag5	All_Gio
ENSMUSG00000036777	5515.61	-0.0300143	0.0822034	0.622133	0.85264	Anln	All_Gio
ENSMUSG00000022021	1219.32	0.0294257	0.0752796	0.6229	0.853242	Diaph3	All_Gio
ENSMUSG00000029366	30225.9	-0.0285748	0.0842418	0.622968	0.853245	Dck	All_Gio
ENSMUSG00000019370	11549	0.0446138	0.0835881	0.628827	0.855635	Calm3	All_Gio
ENSMUSG00000028873	15862.5	-0.0275895	0.0733571	0.631315	0.857193	Cdca8	All_Gio
ENSMUSG00000032221	2816.91	-0.0282528	0.0791656	0.63182	0.85735	Mns1	All_Gio
ENSMUSG00000024151	11742.6	-0.026743	0.0639609	0.633206	0.857436	Msh2	All_Gio
ENSMUSG00000027641	8560.35	-0.0319487	0.0941613	0.634075	0.857495	Rbl1	All_Gio
ENSMUSG00000030929	705.646	0.0267136	0.0928296	0.633905	0.857495	Eri2	All_Gio
ENSMUSG00000026683	12178	0.0329847	0.0701568	0.635068	0.858221	Nuf2	All_Gio
ENSMUSG00000041126	17411.1	0.0409856	0.0795078	0.646202	0.86405	H2afv	All_Gio
ENSMUSG00000030528	3142.58	0.0283651	0.0896388	0.64723	0.864461	Blm	All_Gio
ENSMUSG00000078521	1539.51	-0.0266339	0.0972033	0.649655	0.865297	Aunip	All_Gio
ENSMUSG00000035455	15151.7	-0.0266888	0.069512	0.650859	0.866295	Fignl1	All_Gio
ENSMUSG00000041219	6298.45	0.0276676	0.0845597	0.652173	0.866869	Arhgap11a	All_Gio
ENSMUSG00000028312	14718.6	0.0268735	0.0656503	0.657098	0.869765	Smc2	All_Gio
ENSMUSG00000038943	9957.29	-0.0172896	0.0512663	0.664057	0.873645	Prc1	All_Gio
ENSMUSG00000034303	658.875	-0.0260326	0.0912777	0.668178	0.875836	Ccdc15	All_Gio
ENSMUSG00000074909	1122.21	-0.0245803	0.0821154	0.672381	0.876724	Ranbp6	All_Gio
ENSMUSG00000048799	2146	-0.0234898	0.0976397	0.683172	0.881575	Cep120	All_Gio
ENSMUSG00000028175	3501.82	-0.0229888	0.100195	0.683421	0.881616	Depdc1a	All_Gio
ENSMUSG00000019961	43304.4	-0.0188976	0.0752738	0.688271	0.883404	Tmpo	All_Gio
ENSMUSG00000034023	2582.41	-0.0241245	0.0912797	0.688548	0.883404	Fancd2	All_Gio
ENSMUSG00000075031	50.2732	-0.0178132	0.112681	0.689617	0.884148	Hist1h2bb	All_Gio
ENSMUSG00000034906	15496.1	0.022093	0.0619811	0.690497	0.884273	Ncaph	All_Gio
ENSMUSG00000015478	951.089	0.0232106	0.0790101	0.696765	0.888042	Rnf5	All_Gio
ENSMUSG00000053128	64.3021	0.0185028	0.113306	0.702542	0.89058	Rnf26	All_Gio
ENSMUSG00000019214	4106.41	0.0220685	0.071737	0.703784	0.891092	Chtf18	All_Gio
ENSMUSG00000033589	4444.54	-0.0165484	0.0545256	0.704779	0.891572	Reep4	All_Gio
ENSMUSG00000024542	2269.59	0.0203702	0.101945	0.712757	0.894366	Cep192	All_Gio
ENSMUSG00000048922	6741.62	0.0170046	0.0506919	0.713221	0.894366	Cdca2	All_Gio
ENSMUSG00000030726	8274.89	0.0215959	0.0547533	0.7151	0.894622	Pold3	All_Gio
ENSMUSG00000027883	3930.48	0.0242934	0.0745716	0.715452	0.894715	Gpsm2	All_Gio
ENSMUSG00000033596	9199.51	0.0253704	0.101153	0.715743	0.894742	Rfwd3	All_Gio
ENSMUSG00000006585	5693.22	0.0229792	0.0861738	0.716022	0.894828	Cdt1	All_Gio
ENSMUSG00000026662	9255.65	0.0193524	0.0576704	0.718005	0.895365	Sephs1	All_Gio
ENSMUSG00000040312	1252.75	0.021446	0.093839	0.719813	0.896169	Cchcr1	All_Gio
ENSMUSG00000024691	12163.4	0.0206295	0.0705288	0.721086	0.897065	Fam111a	All_Gio
ENSMUSG00000000568	26049.3	-0.0221634	0.0673919	0.722618	0.898143	Hnrnpd	All_Gio
ENSMUSG00000028933	1079.41	-0.0203122	0.0991693	0.723706	0.898528	Xrcc2	All_Gio
ENSMUSG00000037020	1839.22	-0.0206137	0.0972676	0.726487	0.899896	Wdr62	All_Gio
ENSMUSG00000040204	52507.8	-0.0204907	0.0776112	0.728084	0.900151	Pclaf	All_Gio
ENSMUSG00000052798	11292.1	0.0161008	0.0588103	0.730172	0.900903	Nup107	All_Gio
ENSMUSG00000000759	3649.26	0.0210247	0.0833258	0.731438	0.900995	Tubgcp3	All_Gio
ENSMUSG00000027722	2718.2	-0.0205682	0.0773546	0.731805	0.901002	Spata5	All_Gio
ENSMUSG00000023345	2116.7	-0.0206004	0.0823068	0.733939	0.901169	Poc1a	All_Gio
ENSMUSG00000021671	1812.66	-0.01768	0.0639894	0.735075	0.902137	Poc5	All_Gio
ENSMUSG00000024989	6907.27	-0.0187929	0.075042	0.735501	0.90224	Cep55	All_Gio
ENSMUSG00000031016	6905.78	0.0174147	0.0679122	0.753219	0.907998	Wee1	All_Gio
ENSMUSG00000020235	11015	0.0187851	0.0806743	0.755284	0.9085	Fzr1	All_Gio
ENSMUSG00000031928	3224.12	0.0151837	0.0603831	0.75551	0.9085	Mre11a	All_Gio
ENSMUSG00000027201	1026.81	-0.0217592	0.0775599	0.757378	0.909032	Myef2	All_Gio
ENSMUSG00000069306	41.9229	-0.0127759	0.113513	0.757426	0.909032	Hist1h4m	All_Gio
ENSMUSG00000059791	6020.88	0.0172193	0.0693613	0.761616	0.910787	Nrm	All_Gio
ENSMUSG00000036181	384.868	0.0176476	0.0989305	0.764799	0.91178	Hist1h1c	All_Gio
ENSMUSG00000031360	4484.58	-0.0161339	0.0622888	0.767484	0.913677	Ctps2	All_Gio
ENSMUSG00000021597	2492.87	-0.0173873	0.0942989	0.769655	0.914714	Slf1	All_Gio
ENSMUSG00000024056	10590.4	-0.0155115	0.0732281	0.769753	0.914714	Ndc80	All_Gio
ENSMUSG00000036768	6435.78	-0.0167336	0.0735347	0.773864	0.916534	Kif15	All_Gio
ENSMUSG00000025395	10294	-0.0172156	0.0802147	0.774093	0.91662	Prim1	All_Gio
ENSMUSG00000016619	5353.72	0.0167723	0.0632368	0.776889	0.917982	Nup50	All_Gio
ENSMUSG00000038000	4922	0.0172049	0.0905038	0.778736	0.918834	Acd	All_Gio
ENSMUSG00000023015	17594.7	0.0158266	0.0554004	0.780562	0.919507	Racgap1	All_Gio
ENSMUSG00000040195	1114.06	0.015773	0.105948	0.784241	0.921041	Nemp1	All_Gio
ENSMUSG00000025364	13094.1	-0.0172744	0.0790322	0.784381	0.921123	Pa2g4	All_Gio
ENSMUSG00000027331	4083.76	0.0155691	0.0685628	0.785086	0.921637	Knstrn	All_Gio
ENSMUSG00000020899	1628.27	-0.0164776	0.0855068	0.785507	0.921834	Pfas	All_Gio
ENSMUSG00000074476	9524.57	-0.0153473	0.0659599	0.787002	0.922338	Spc24	All_Gio
ENSMUSG00000047832	10091.1	-0.0158097	0.0746986	0.7871	0.922343	Cdca4	All_Gio
ENSMUSG00000032113	4022.94	-0.0166689	0.083408	0.788058	0.922691	Chek1	All_Gio
ENSMUSG00000023505	11706.5	-0.0127688	0.0672656	0.78877	0.922906	Cdca3	All_Gio
ENSMUSG00000050628	1043.4	-0.016229	0.0898292	0.789182	0.923044	Ubald2	All_Gio
ENSMUSG00000006678	6602.59	-0.0153127	0.0971151	0.792244	0.924589	Pola1	All_Gio
ENSMUSG00000017548	8085.81	0.0183119	0.0833598	0.793615	0.925581	Suz12	All_Gio
ENSMUSG00000022034	9955.6	0.0203084	0.0848899	0.794823	0.925771	Esco2	All_Gio
ENSMUSG00000024974	13180.5	-0.0128695	0.0604084	0.796056	0.926373	Smc3	All_Gio
ENSMUSG00000056394	19989.1	0.0147897	0.0662515	0.797433	0.926991	Lig1	All_Gio
ENSMUSG00000030177	1295.99	-0.0109599	0.095446	0.80731	0.931255	Ccdc77	All_Gio
ENSMUSG00000045328	6890.75	-0.012871	0.0753207	0.813335	0.934439	Cenpe	All_Gio
ENSMUSG00000029730	41325.9	0.0126709	0.0633261	0.815221	0.934928	Mcm7	All_Gio
ENSMUSG00000031262	4840.28	-0.0121405	0.0689675	0.816299	0.935014	Cenpi	All_Gio
ENSMUSG00000001440	7079.04	-0.011902	0.0630799	0.818876	0.936427	Kpnb1	All_Gio
ENSMUSG00000035365	1341.01	0.0128983	0.0716886	0.820421	0.937055	Parpbp	All_Gio
ENSMUSG00000027715	31451.5	0.010828	0.060476	0.827834	0.939945	Ccna2	All_Gio
ENSMUSG00000030978	58912.3	0.0129371	0.0726672	0.827743	0.939945	Rrm1	All_Gio
ENSMUSG00000037443	6829.06	0.0126142	0.0712537	0.827741	0.939945	Cep85	All_Gio
ENSMUSG00000019813	2240.29	-0.0126146	0.0734655	0.83229	0.942088	Cep57l1	All_Gio
ENSMUSG00000019303	2008.74	0.0138196	0.0772881	0.83566	0.943075	Psmc3ip	All_Gio
ENSMUSG00000005566	20570.6	0.0248575	0.0776696	0.837642	0.943798	Trim28	All_Gio
ENSMUSG00000060860	8968.23	-0.0121865	0.084355	0.839424	0.944997	Ube2s	All_Gio
ENSMUSG00000017561	13404.5	0.011025	0.0554121	0.844217	0.945948	Crlf3	All_Gio
ENSMUSG00000026355	63934.1	0.0104328	0.0607503	0.843565	0.945948	Mcm6	All_Gio
ENSMUSG00000020739	13581.4	0.0154385	0.0761436	0.847497	0.946821	Nup85	All_Gio
ENSMUSG00000004642	34758.9	-0.0127102	0.0896418	0.848913	0.947132	Slbp	All_Gio
ENSMUSG00000038481	1983.56	-0.0163751	0.103878	0.848199	0.947132	Cdk19	All_Gio
ENSMUSG00000039055	1687.99	0.0118206	0.0749693	0.848465	0.947132	Eme1	All_Gio
ENSMUSG00000058773	3443.47	-0.00951898	0.103107	0.848714	0.947132	Hist1h1b	All_Gio
ENSMUSG00000005698	14653.1	0.00697432	0.0418525	0.854116	0.94873	Ctcf	All_Gio
ENSMUSG00000031527	11645	-0.0102417	0.0798121	0.855172	0.949505	Eri1	All_Gio
ENSMUSG00000024795	6292.52	-0.0130675	0.0917368	0.857759	0.950782	Kif20b	All_Gio
ENSMUSG00000015165	14531.6	0.00769935	0.068954	0.862554	0.952035	Hnrnpl	All_Gio
ENSMUSG00000025358	10200.9	0.0133002	0.0692931	0.862595	0.952035	Cdk2	All_Gio
ENSMUSG00000031821	3399.1	-0.0107841	0.0850303	0.861797	0.952035	Gins2	All_Gio
ENSMUSG00000037608	10755.3	0.0100168	0.0773006	0.864327	0.953241	Bclaf1	All_Gio
ENSMUSG00000036403	911.362	0.00969973	0.0997717	0.867382	0.954373	Cep135	All_Gio
ENSMUSG00000036223	2624.66	-0.00942831	0.0774794	0.871509	0.955324	Ska1	All_Gio
ENSMUSG00000054099	638.19	0.00808686	0.10759	0.871947	0.955487	Slc25a40	All_Gio
ENSMUSG00000035683	5194.8	0.00847864	0.0684976	0.873365	0.956011	Melk	All_Gio
ENSMUSG00000009575	6626.69	0.00892632	0.0716619	0.877156	0.95769	Cbx5	All_Gio
ENSMUSG00000040599	3942.2	0.00914435	0.074919	0.877869	0.958039	Mis12	All_Gio
ENSMUSG00000002718	22224.7	0.0110326	0.0772354	0.878818	0.958472	Cse1l	All_Gio
ENSMUSG00000020358	17446.9	-0.00904561	0.0612756	0.880222	0.95913	Hnrnpab	All_Gio
ENSMUSG00000079553	1836.09	-0.00736266	0.0961612	0.881353	0.959316	Kifc1	All_Gio
ENSMUSG00000027184	34076	0.0110343	0.0885284	0.881987	0.959546	Caprin1	All_Gio
ENSMUSG00000027115	5578.42	-0.0081674	0.091402	0.886655	0.961616	Kif18a	All_Gio
ENSMUSG00000026037	3384.23	0.00771154	0.0715494	0.888472	0.962079	Orc2	All_Gio
ENSMUSG00000005410	40025.7	0.00774001	0.0661658	0.88995	0.962487	Mcm5	All_Gio
ENSMUSG00000047246	261.662	0.00742382	0.10572	0.890296	0.962619	Hist1h2be	All_Gio
ENSMUSG00000023932	7891.29	0.00756723	0.0689449	0.890788	0.962683	Cdc5l	All_Gio
ENSMUSG00000002297	5213.45	0.00797333	0.0725762	0.892617	0.963597	Dbf4	All_Gio
ENSMUSG00000047534	6398.37	-0.00672061	0.0920631	0.897629	0.965324	Mis18bp1	All_Gio
ENSMUSG00000032939	12603.2	-0.0072716	0.065511	0.90023	0.966072	Nup93	All_Gio
ENSMUSG00000050107	3516.61	-0.00710022	0.0674705	0.899367	0.966072	Haspin	All_Gio
ENSMUSG00000041346	1772.68	-0.00751706	0.0856137	0.901632	0.966631	Wrap53	All_Gio
ENSMUSG00000015749	34964.4	0.0133474	0.0637587	0.906298	0.968206	Anp32e	All_Gio
ENSMUSG00000007570	905.77	-0.00689284	0.0825951	0.907721	0.96863	Fance	All_Gio
ENSMUSG00000021377	19767	0.00677449	0.0840889	0.908022	0.968675	Dek	All_Gio
ENSMUSG00000028702	5517.61	-0.00674754	0.0771182	0.909243	0.9688	Rad54l	All_Gio
ENSMUSG00000020290	20827.6	0.00626505	0.099358	0.914387	0.970442	Xpo1	All_Gio
ENSMUSG00000034021	6051.85	0.0111447	0.0936614	0.917718	0.970868	Pds5b	All_Gio
ENSMUSG00000037572	5657.26	0.00806632	0.0929938	0.918534	0.971015	Wdhd1	All_Gio
ENSMUSG00000014355	8477.41	0.00350343	0.103346	0.919255	0.9713	Anapc1	All_Gio
ENSMUSG00000033222	3620.3	-0.00598952	0.0684547	0.919609	0.971567	Ttf2	All_Gio
ENSMUSG00000025862	11059.7	0.00788472	0.100774	0.923485	0.973272	Stag2	All_Gio
ENSMUSG00000022142	4040.08	-0.00509807	0.0902781	0.929947	0.976106	Nup155	All_Gio
ENSMUSG00000038070	861.312	-0.00655774	0.0913162	0.932172	0.976245	Cntln	All_Gio
ENSMUSG00000002428	2288.81	-0.00464773	0.0953312	0.936176	0.977878	Hltf	All_Gio
ENSMUSG00000041879	8617.62	0.00496899	0.0786601	0.936127	0.977878	Ipo9	All_Gio
ENSMUSG00000039396	7209.23	0.00927294	0.0803656	0.937892	0.978578	Neil3	All_Gio
ENSMUSG00000050555	999.968	-0.00456385	0.0881137	0.940055	0.979763	Hyls1	All_Gio
ENSMUSG00000020914	46292.9	0.00215835	0.0847945	0.941402	0.980391	Top2a	All_Gio
ENSMUSG00000042208	2561.35	0.00372648	0.0901175	0.947073	0.982028	0610010F05Rik	All_Gio
ENSMUSG00000062727	43.5573	-0.00265703	0.11242	0.947344	0.982028	Hist1h2bk	All_Gio
ENSMUSG00000031577	1189.29	-0.00368246	0.0706807	0.953415	0.984538	Tti2	All_Gio
ENSMUSG00000035439	2572.51	0.00606888	0.0837875	0.953217	0.984538	Haus8	All_Gio
ENSMUSG00000021929	9260.18	0.00341255	0.0981345	0.955435	0.985194	Kpna3	All_Gio
ENSMUSG00000023072	1871.73	-0.00257002	0.0804399	0.955384	0.985194	Cep89	All_Gio
ENSMUSG00000028688	604.759	-0.00589078	0.0797384	0.956937	0.985607	Toe1	All_Gio
ENSMUSG00000019845	1760.84	-0.0016084	0.075813	0.958433	0.98651	Tube1	All_Gio
ENSMUSG00000003190	352.548	-0.00278851	0.092734	0.959348	0.987078	Bcl2l12	All_Gio
ENSMUSG00000043015	1122.69	-0.00261164	0.0886783	0.964904	0.988306	Nemp2	All_Gio
ENSMUSG00000049932	18020.8	0.00143313	0.0845493	0.965425	0.988456	H2afx	All_Gio
ENSMUSG00000034883	1761.8	-0.0023728	0.0947469	0.966528	0.989124	Lrr1	All_Gio
ENSMUSG00000027330	7150.62	-0.0012174	0.0944296	0.968001	0.990093	Cdc25b	All_Gio
ENSMUSG00000039748	5025.66	-0.00246047	0.0704507	0.970825	0.991196	Exo1	All_Gio
ENSMUSG00000029782	6172.62	0.00174319	0.0786154	0.975057	0.99221	Tmem209	All_Gio
ENSMUSG00000041147	1800.79	-0.0016962	0.0809826	0.97632	0.99221	Brca2	All_Gio
ENSMUSG00000022604	865.287	-0.00114931	0.0939245	0.976674	0.992461	Cep97	All_Gio
ENSMUSG00000029283	4111.48	-0.00106236	0.0834011	0.987913	0.995925	Cdc7	All_Gio
ENSMUSG00000039231	7091.31	-0.000752932	0.0544901	0.990383	0.997044	Suv39h1	All_Gio
ENSMUSG00000023940	6371.73	0.000341119	0.0652687	0.99133	0.997375	Sgo1	All_Gio
ENSMUSG00000022945	9471.44	-0.000135832	0.0829378	0.995959	0.998187	Chaf1b	All_Gio
ENSMUSG00000026429	3075.24	0.000321405	0.0828929	0.995652	0.998187	Ube2t	All_Gio
ENSMUSG00000034317	12548	0.00141664	0.0918361	0.99572	0.998187	Trim59	All_Gio
ENSMUSG00000063689	0.466833	-0.00266934	0.121062	0.639722	1	Hist2h2ab	All_Gio
ENSMUSG00000064288	14.5941	-0.0136776	0.11914	0.618971	1	Hist1h4k	All_Gio
ENSMUSG00000069274	14.0431	0.00733167	0.118328	0.796094	1	Hist1h4f	All_Gio
ENSMUSG00000105827	0	NA	NA	NA	1	Hist2h2bb	All_Gio
ENSMUSG00000113786	0	NA	NA	NA	1	Gm49384	All_Gio
ENSMUSG00000028134	6963.23	4.16497	0.126848	2.33191e-238	3.07253e-234	Ptbp2	All_Genes
ENSMUSG00000067017	8189.35	-3.74063	0.117646	6.11032e-223	4.02548e-219	Gm3608	All_Genes
ENSMUSG00000006498	8108.6	-1.97989	0.0656884	8.12592e-201	3.5689e-197	Ptbp1	All_Genes
ENSMUSG00000003379	38082.3	-0.953985	0.0770996	2.08168e-36	6.85705e-33	Cd79a	All_Genes
ENSMUSG00000104413	903.936	-1.39249	0.125408	5.96033e-30	1.57067e-26	Gm37065	All_Genes
ENSMUSG00000032058	4272.66	-0.954993	0.0864426	1.24476e-29	2.7335e-26	Ppp2r1b	All_Genes
ENSMUSG00000054426	457.932	-1.50822	0.137534	2.20288e-29	4.14646e-26	A930005H10Rik	All_Genes
ENSMUSG00000028923	2595.52	-1.06235	0.0988424	3.15817e-28	5.20151e-25	Necap2	All_Genes
ENSMUSG00000070372	12928.4	1.36462	0.129115	2.20745e-27	3.2317e-24	Capza1	All_Genes
ENSMUSG00000030533	1424.08	-1.1432	0.1092	6.22831e-27	8.20642e-24	Unc45a	All_Genes
ENSMUSG00000029171	1189.59	-1.41857	0.139021	8.37929e-26	1.00369e-22	Pgm1	All_Genes
ENSMUSG00000041115	321.718	1.75665	0.173746	2.37443e-25	2.60712e-22	Iqsec2	All_Genes
ENSMUSG00000035000	9149.18	-1.17515	0.1176	7.51646e-25	7.61822e-22	Dpp4	All_Genes
ENSMUSG00000002227	1341.24	-1.03183	0.111038	6.37543e-22	6.00019e-19	Mov10	All_Genes
ENSMUSG00000039345	1036.18	1.06859	0.117797	6.26732e-21	5.50521e-18	Mettl22	All_Genes
ENSMUSG00000100455	801.928	1.23999	0.152559	2.04543e-17	1.68441e-14	Gm29170	All_Genes
ENSMUSG00000040663	713.977	1.02397	0.12863	8.46981e-17	6.5646e-14	Clcf1	All_Genes
ENSMUSG00000001029	1756.85	-0.730603	0.0927042	1.89278e-16	1.38551e-13	Icam2	All_Genes
ENSMUSG00000020882	1149.09	1.1043	0.149366	6.86547e-15	4.76102e-12	Cacnb1	All_Genes
ENSMUSG00000025465	2395.77	-0.51712	0.0709829	2.0624e-14	1.35871e-11	Echs1	All_Genes
ENSMUSG00000026187	1684.6	-0.758359	0.10534	2.95898e-14	1.85655e-11	Xrcc5	All_Genes
ENSMUSG00000021493	800.016	0.802686	0.116967	4.27138e-13	2.55817e-10	Pdlim7	All_Genes
ENSMUSG00000001525	67884.2	0.537338	0.0792835	8.74872e-13	5.01188e-10	Tubb5	All_Genes
ENSMUSG00000021288	3708.09	0.5169	0.0769188	1.50864e-12	8.28242e-10	Klc1	All_Genes
ENSMUSG00000044694	352.625	0.897143	0.137669	3.85008e-12	2.02914e-09	2010007H06Rik	All_Genes
ENSMUSG00000039774	1397.5	-0.811932	0.126552	7.71133e-12	3.90787e-09	Galnt12	All_Genes
ENSMUSG00000024426	527.941	0.978784	0.153894	1.01255e-11	4.94124e-09	Atat1	All_Genes
ENSMUSG00000012519	895.175	-1.02825	0.162265	1.10867e-11	5.21709e-09	Mlkl	All_Genes
ENSMUSG00000045973	4554.03	0.436855	0.0678894	1.19135e-11	5.41283e-09	Slc25a51	All_Genes
ENSMUSG00000024222	8339.59	0.374261	0.0593792	2.89961e-11	1.27351e-08	Fkbp5	All_Genes
ENSMUSG00000085379	116.5	1.25358	0.206432	6.48164e-11	2.75491e-08	2310058D17Rik	All_Genes
ENSMUSG00000061665	697.05	-0.879171	0.145239	7.48814e-11	3.08324e-08	Cd2ap	All_Genes
ENSMUSG00000029016	660.257	1.15777	0.193631	1.12435e-10	4.48922e-08	Clcn6	All_Genes
ENSMUSG00000032122	1650.14	0.590142	0.0989141	1.5859e-10	6.14584e-08	Slc37a2	All_Genes
ENSMUSG00000026767	1090.35	-0.599501	0.100973	1.98564e-10	7.26746e-08	Mindy3	All_Genes
ENSMUSG00000112969	36.5294	-2.83934	0.482525	1.96488e-10	7.26746e-08	Gm48496	All_Genes
ENSMUSG00000089762	129.224	1.36876	0.240502	5.63659e-10	2.00723e-07	Ier5l	All_Genes
ENSMUSG00000031575	7782.51	-0.298256	0.0522522	1.54861e-09	5.36962e-07	Ash2l	All_Genes
ENSMUSG00000059851	2058.74	-0.342139	0.0607753	2.0845e-09	7.04242e-07	Kmt5c	All_Genes
ENSMUSG00000030742	669.352	-0.76948	0.14171	3.02041e-09	9.94924e-07	Lat	All_Genes
ENSMUSG00000021408	1411.37	-0.939418	0.174265	3.4052e-09	1.09431e-06	Ripk1	All_Genes
ENSMUSG00000040112	2195.69	-0.474659	0.0870284	3.75002e-09	1.1383e-06	Mrps35	All_Genes
ENSMUSG00000041298	622.584	0.85621	0.158838	3.78131e-09	1.1383e-06	Katnal1	All_Genes
ENSMUSG00000073557	269.049	1.40944	0.26237	3.80125e-09	1.1383e-06	Ppp1r12b	All_Genes
ENSMUSG00000052676	677.717	0.834781	0.156792	5.13741e-09	1.50423e-06	Zmat1	All_Genes
ENSMUSG00000067567	1106.6	-0.597838	0.111995	5.26474e-09	1.508e-06	Hdac8	All_Genes
ENSMUSG00000020528	2636.11	0.46879	0.0870154	5.53148e-09	1.5507e-06	Prpsap2	All_Genes
ENSMUSG00000002043	870.743	-0.562834	0.105405	6.14558e-09	1.68696e-06	Trappc6a	All_Genes
ENSMUSG00000032366	880.779	-0.661137	0.124967	7.09278e-09	1.90724e-06	Tpm1	All_Genes
ENSMUSG00000031813	2193.5	-0.486324	0.0931477	1.01733e-08	2.68087e-06	Mvb12a	All_Genes
ENSMUSG00000024403	154.653	1.33715	0.262248	1.37227e-08	3.5453e-06	Atp6v1g2	All_Genes
ENSMUSG00000006800	717.629	1.08401	0.21203	1.46395e-08	3.70943e-06	Sulf2	All_Genes
ENSMUSG00000054808	17808.7	-0.237191	0.0441383	2.004e-08	4.98203e-06	Actn4	All_Genes
ENSMUSG00000022519	1183.94	0.876271	0.173634	2.58155e-08	6.29897e-06	Srl	All_Genes
ENSMUSG00000022514	634.74	-0.751846	0.150882	2.85523e-08	6.84008e-06	Il1rap	All_Genes
ENSMUSG00000029468	191.634	-0.967869	0.196784	4.04623e-08	9.5202e-06	P2rx7	All_Genes
ENSMUSG00000039018	1086.4	-0.511174	0.102724	4.39708e-08	1.01642e-05	Mtg1	All_Genes
ENSMUSG00000034401	3322.06	-0.562606	0.113736	4.67353e-08	1.0617e-05	Spata6	All_Genes
ENSMUSG00000025188	988.075	-0.599196	0.121302	4.96072e-08	1.10784e-05	Hps1	All_Genes
ENSMUSG00000051007	1417.46	-0.433295	0.0871366	5.49798e-08	1.20736e-05	Gatd1	All_Genes
ENSMUSG00000037860	695.611	-0.772216	0.159604	6.27528e-08	1.35546e-05	Aim2	All_Genes
ENSMUSG00000028419	1725.03	-0.67813	0.139977	6.68163e-08	1.41995e-05	Chmp5	All_Genes
ENSMUSG00000033111	713.99	-0.612847	0.127351	8.88005e-08	1.8572e-05	3830406C13Rik	All_Genes
ENSMUSG00000020585	4068.97	-0.284278	0.0571189	9.19977e-08	1.894e-05	Laptm4a	All_Genes
ENSMUSG00000023067	4617.83	0.465342	0.0962085	1.00046e-07	2.028e-05	Cdkn1a	All_Genes
ENSMUSG00000059714	1581.85	0.471339	0.0988992	1.42935e-07	2.79543e-05	Flot1	All_Genes
ENSMUSG00000112063	422.807	-0.81839	0.175063	1.44269e-07	2.79543e-05	Gm32220	All_Genes
ENSMUSG00000096255	1514.43	-0.892255	0.191948	1.60604e-07	3.06685e-05	Dynlt1b	All_Genes
ENSMUSG00000037847	621.976	-0.630067	0.134849	1.72471e-07	3.24639e-05	Nmrk1	All_Genes
ENSMUSG00000060260	474.483	0.606799	0.130102	1.83587e-07	3.40697e-05	Pwwp2b	All_Genes
ENSMUSG00000052572	1760.86	-0.622828	0.134571	1.99774e-07	3.65587e-05	Dlg2	All_Genes
ENSMUSG00000052369	1828.48	-0.49217	0.105406	2.06186e-07	3.72151e-05	Tmem106c	All_Genes
ENSMUSG00000086350	173.493	1.02616	0.223732	2.13556e-07	3.80246e-05	B230369F24Rik	All_Genes
ENSMUSG00000015575	4613.81	-0.342969	0.0724436	2.24578e-07	3.94539e-05	Atp6v0e	All_Genes
ENSMUSG00000022594	834.998	0.729455	0.15959	2.56065e-07	4.43935e-05	Lynx1	All_Genes
ENSMUSG00000034959	397.582	-0.590022	0.128676	2.69043e-07	4.60378e-05	Rubcnl	All_Genes
ENSMUSG00000027550	1936.18	-0.760597	0.168613	3.26272e-07	5.4942e-05	Lrrcc1	All_Genes
ENSMUSG00000062510	3192.23	-0.321159	0.0685697	3.29419e-07	5.4942e-05	Nsl1	All_Genes
ENSMUSG00000028613	854.593	0.54974	0.120976	3.35861e-07	5.53162e-05	Lrp8	All_Genes
ENSMUSG00000063320	524.774	-0.675771	0.149746	3.50372e-07	5.69693e-05	1190007I07Rik	All_Genes
ENSMUSG00000097287	185.23	0.929377	0.20771	3.54545e-07	5.69693e-05	D130017N08Rik	All_Genes
ENSMUSG00000024665	2657.23	0.44243	0.0969528	4.26333e-07	6.76792e-05	Fads2	All_Genes
ENSMUSG00000032936	839.156	0.653492	0.146651	4.34593e-07	6.8169e-05	Camkv	All_Genes
ENSMUSG00000027552	791.151	-0.421358	0.0926688	4.46573e-07	6.84191e-05	E2f5	All_Genes
ENSMUSG00000032556	8293.62	0.396595	0.0889412	4.42218e-07	6.84191e-05	Bfsp2	All_Genes
ENSMUSG00000045282	488.72	0.792582	0.178452	4.56554e-07	6.91443e-05	Tmem86b	All_Genes
ENSMUSG00000046329	330.502	0.869612	0.197491	5.15269e-07	7.71498e-05	Slc25a23	All_Genes
ENSMUSG00000031823	2010.23	0.433127	0.0971028	6.30433e-07	9.33324e-05	Zdhhc7	All_Genes
ENSMUSG00000030815	814.98	0.401711	0.0903462	7.90242e-07	0.000114775	Phkg2	All_Genes
ENSMUSG00000056220	781.651	-0.672919	0.155094	7.92694e-07	0.000114775	Pla2g4a	All_Genes
ENSMUSG00000020894	1524.46	0.418615	0.0960809	8.50163e-07	0.000121758	Vamp2	All_Genes
ENSMUSG00000039891	106.83	1.62446	0.381383	8.90001e-07	0.000126093	Txlnb	All_Genes
ENSMUSG00000040554	51.0031	-2.0975	0.498316	8.99858e-07	0.000126133	Aipl1	All_Genes
ENSMUSG00000000552	364.876	0.457913	0.104665	9.2201e-07	0.000126546	Zfp385a	All_Genes
ENSMUSG00000056999	21855	-0.548754	0.12665	9.12877e-07	0.000126546	Ide	All_Genes
ENSMUSG00000078485	1159.55	0.33158	0.0745474	9.40292e-07	0.000127725	Plekhn1	All_Genes
ENSMUSG00000054675	2956.66	0.623619	0.14499	9.82835e-07	0.000132141	Tmem119	All_Genes
ENSMUSG00000035062	424.404	-0.544805	0.126707	1.06017e-06	0.000139687	Zc4h2	All_Genes
ENSMUSG00000024696	250.377	-0.641871	0.15096	1.16109e-06	0.000151471	Lpxn	All_Genes
ENSMUSG00000063018	161.157	-0.833847	0.197841	1.19594e-06	0.000154487	2010204K13Rik	All_Genes
ENSMUSG00000019188	4275.62	-0.368155	0.0839576	1.25357e-06	0.000160359	H13	All_Genes
ENSMUSG00000052914	311.885	-0.898168	0.216037	1.43766e-06	0.000182141	Cyp2j6	All_Genes
ENSMUSG00000026317	445.288	0.553102	0.131151	1.5379e-06	0.000192985	Cln8	All_Genes
ENSMUSG00000075602	3149.69	0.656331	0.158597	1.61551e-06	0.000200811	Ly6a	All_Genes
ENSMUSG00000025747	12754.4	-0.337459	0.0781875	1.87594e-06	0.000230837	Tyms	All_Genes
ENSMUSG00000060992	11687.2	-0.272373	0.0616147	1.89211e-06	0.000230837	Copz1	All_Genes
ENSMUSG00000040339	706.732	-1.13022	0.278976	2.16633e-06	0.000261868	Fam102b	All_Genes
ENSMUSG00000046034	3084.87	-0.449669	0.107471	2.28726e-06	0.000273972	Otulin	All_Genes
ENSMUSG00000078517	4340.52	0.567456	0.138004	2.43724e-06	0.000289307	Emc1	All_Genes
ENSMUSG00000027478	1160.9	-0.68933	0.170141	2.61914e-06	0.000306671	Dnmt3b	All_Genes
ENSMUSG00000028494	2030.17	-0.414747	0.0998203	2.63007e-06	0.000306671	Plin2	All_Genes
ENSMUSG00000061894	278.599	0.805636	0.200979	2.8659e-06	0.000331238	Zscan20	All_Genes
ENSMUSG00000004626	3150.54	-0.353393	0.0850138	3.03909e-06	0.000346241	Stxbp2	All_Genes
ENSMUSG00000051396	403.07	0.812186	0.20441	3.04827e-06	0.000346241	Gm45902	All_Genes
ENSMUSG00000026000	2215.93	-0.367557	0.0883283	3.14779e-06	0.000354489	Lancl1	All_Genes
ENSMUSG00000061411	209.023	1.17561	0.30036	3.689e-06	0.000411918	Nol4l	All_Genes
ENSMUSG00000082691	2448.76	-0.571948	0.143147	3.78195e-06	0.000418748	Dynlt1-ps1	All_Genes
ENSMUSG00000032415	297.846	-0.537744	0.135309	4.27121e-06	0.000465103	Ube2cbp	All_Genes
ENSMUSG00000032648	766.131	0.590218	0.149485	4.25438e-06	0.000465103	Pygm	All_Genes
ENSMUSG00000003344	2219.13	0.431069	0.106477	4.41227e-06	0.000468839	Btbd2	All_Genes
ENSMUSG00000028071	439.238	-0.633884	0.160637	4.36447e-06	0.000468839	Sh2d2a	All_Genes
ENSMUSG00000036932	5139.47	-0.274768	0.0658417	4.41182e-06	0.000468839	Aifm1	All_Genes
ENSMUSG00000034926	690.66	0.470693	0.117925	4.56362e-06	0.000481042	Dhcr24	All_Genes
ENSMUSG00000029923	253.448	-0.6326	0.161146	4.80555e-06	0.000502523	Rab19	All_Genes
ENSMUSG00000045092	952.675	0.818188	0.21189	4.91346e-06	0.000509762	S1pr1	All_Genes
ENSMUSG00000028214	378.946	-0.709281	0.182078	5.10248e-06	0.000524114	Gem	All_Genes
ENSMUSG00000079427	537.715	-0.604228	0.154624	5.13135e-06	0.000524114	Mthfsl	All_Genes
ENSMUSG00000021213	578.59	-0.513474	0.130898	5.47136e-06	0.000554544	Akr1c13	All_Genes
ENSMUSG00000011148	4631.63	0.401947	0.100271	6.02509e-06	0.000606005	Adssl1	All_Genes
ENSMUSG00000022177	5985.79	-0.336689	0.0833599	6.2771e-06	0.000626569	Haus4	All_Genes
ENSMUSG00000035142	662.385	-0.590301	0.153666	6.83959e-06	0.000677582	Nubpl	All_Genes
ENSMUSG00000041426	1341.6	-0.366129	0.0932092	7.78725e-06	0.000765708	Hibch	All_Genes
ENSMUSG00000030231	653.735	-0.431428	0.111475	8.19152e-06	0.000793614	Plekha5	All_Genes
ENSMUSG00000030934	10026.5	-0.338443	0.0847877	8.18385e-06	0.000793614	Oat	All_Genes
ENSMUSG00000024078	1771.45	-0.41667	0.107561	8.26102e-06	0.000794506	Ttc27	All_Genes
ENSMUSG00000008496	197.494	0.751568	0.20034	8.43213e-06	0.000805085	Pou2f2	All_Genes
ENSMUSG00000002944	1084.57	0.710836	0.190374	8.99805e-06	0.000852938	Cd36	All_Genes
ENSMUSG00000029516	1175.81	0.505447	0.13274	9.14004e-06	0.000860208	Cit	All_Genes
ENSMUSG00000022748	1818.01	-0.396553	0.10264	9.3116e-06	0.000870139	Cmss1	All_Genes
ENSMUSG00000083161	915.075	0.60932	0.161865	9.60012e-06	0.000890783	Gm11427	All_Genes
ENSMUSG00000036948	575.66	0.587043	0.156287	9.6879e-06	0.000892642	BC037034	All_Genes
ENSMUSG00000026701	11253.8	-0.37376	0.0963226	9.90599e-06	0.000906398	Prdx6	All_Genes
ENSMUSG00000018008	1982.22	0.340452	0.0880009	1.13474e-05	0.00103113	Cyth4	All_Genes
ENSMUSG00000029836	4319.41	0.46308	0.12239	1.16983e-05	0.00105573	Cbx3	All_Genes
ENSMUSG00000047804	1628.27	0.357279	0.0925044	1.20905e-05	0.00108264	Akap10	All_Genes
ENSMUSG00000047888	428.525	0.651427	0.17702	1.21608e-05	0.00108264	Tnrc6b	All_Genes
ENSMUSG00000056666	691.7	-0.533415	0.144698	1.25562e-05	0.00111034	Retsat	All_Genes
ENSMUSG00000115338	2570.4	-0.398725	0.105496	1.27351e-05	0.00111866	Pnp	All_Genes
ENSMUSG00000053137	750.413	0.548321	0.148577	1.31054e-05	0.00114356	Mapk11	All_Genes
ENSMUSG00000031534	627.891	-0.489021	0.131611	1.32075e-05	0.00114489	Smim19	All_Genes
ENSMUSG00000018659	834.611	-0.473906	0.127576	1.37117e-05	0.00116576	Pnpo	All_Genes
ENSMUSG00000026740	763.312	-0.431111	0.115277	1.36197e-05	0.00116576	Dnajc1	All_Genes
ENSMUSG00000038855	675.92	0.589628	0.161278	1.37138e-05	0.00116576	Itpkb	All_Genes
ENSMUSG00000035569	6016.12	0.331602	0.0873284	1.54786e-05	0.00130734	Ankrd11	All_Genes
ENSMUSG00000075408	825.524	0.562964	0.154862	1.57355e-05	0.00132058	6030408B16Rik	All_Genes
ENSMUSG00000059883	431.355	-0.624743	0.175092	1.58757e-05	0.00132392	Irak4	All_Genes
ENSMUSG00000000295	1627.98	-0.431122	0.116229	1.61422e-05	0.00133175	Hddc2	All_Genes
ENSMUSG00000004056	3489.43	0.36245	0.0962361	1.62729e-05	0.00133175	Akt2	All_Genes
ENSMUSG00000039167	832.296	-0.530024	0.145312	1.62443e-05	0.00133175	Adgrl4	All_Genes
ENSMUSG00000022022	699.98	-0.354216	0.0946697	1.75086e-05	0.00142403	Mtrf1	All_Genes
ENSMUSG00000097412	826.928	-0.476321	0.131192	1.8078e-05	0.00146133	1810014B01Rik	All_Genes
ENSMUSG00000037370	122.308	-0.862001	0.245006	1.86022e-05	0.00149453	Enpp1	All_Genes
ENSMUSG00000033287	421.254	0.500519	0.138312	1.87897e-05	0.00150044	Kctd17	All_Genes
ENSMUSG00000021488	1922.72	0.424547	0.115886	1.91508e-05	0.00152006	Nsd1	All_Genes
ENSMUSG00000062646	403.913	-0.672825	0.190001	1.97646e-05	0.00155939	Ganc	All_Genes
ENSMUSG00000048076	25595.1	-0.213036	0.0544262	2.08177e-05	0.0016327	Arf1	All_Genes
ENSMUSG00000084347	117.463	0.664038	0.188435	2.14962e-05	0.00167594	Akt2-ps	All_Genes
ENSMUSG00000029033	1381.96	0.501988	0.14044	2.25617e-05	0.00174785	Acap3	All_Genes
ENSMUSG00000031521	612.738	-0.598694	0.170253	2.26839e-05	0.00174785	Aga	All_Genes
ENSMUSG00000051817	651.793	0.506711	0.142205	2.30568e-05	0.00176626	Sox12	All_Genes
ENSMUSG00000033429	449.239	-0.556533	0.157643	2.32574e-05	0.00177132	Mcee	All_Genes
ENSMUSG00000023235	529.937	-0.490789	0.138131	2.35266e-05	0.00178153	Ccl25	All_Genes
ENSMUSG00000022562	126.759	1.10507	0.325517	2.39219e-05	0.00180111	Oplah	All_Genes
ENSMUSG00000026687	4944.71	-0.311273	0.0826321	2.41193e-05	0.00180566	Aldh9a1	All_Genes
ENSMUSG00000028217	120.319	-1.42419	0.428285	2.44718e-05	0.00182169	Cdh17	All_Genes
ENSMUSG00000075269	635.512	0.725281	0.209373	2.46914e-05	0.00182772	Bex6	All_Genes
ENSMUSG00000069805	263.678	-0.722944	0.210009	2.5789e-05	0.0018983	Fbp1	All_Genes
ENSMUSG00000029428	1482.41	0.442104	0.124247	2.6613e-05	0.00194807	Stx2	All_Genes
ENSMUSG00000034121	267.938	-0.695591	0.201573	2.70661e-05	0.00197029	Mks1	All_Genes
ENSMUSG00000004105	1145.78	0.584984	0.170236	2.78527e-05	0.00201641	Angptl2	All_Genes
ENSMUSG00000028573	194.957	-0.890393	0.261917	2.80492e-05	0.00201954	Fggy	All_Genes
ENSMUSG00000038005	6199.59	-0.39452	0.111082	2.88186e-05	0.0020525	Hpf1	All_Genes
ENSMUSG00000039637	14221	0.263729	0.0710003	2.87095e-05	0.0020525	Coro7	All_Genes
ENSMUSG00000027082	514.533	-0.812603	0.242149	2.91688e-05	0.00205523	Tfpi	All_Genes
ENSMUSG00000049643	2182.06	0.414768	0.117145	2.90517e-05	0.00205523	2310022A10Rik	All_Genes
ENSMUSG00000024766	1492.37	-0.491766	0.140558	2.9639e-05	0.00207725	Lipo3	All_Genes
ENSMUSG00000023328	87.6928	1.77319	0.547645	3.24335e-05	0.00226108	Ache	All_Genes
ENSMUSG00000049625	7132.14	0.251574	0.0674777	3.29291e-05	0.00228355	Tifab	All_Genes
ENSMUSG00000025271	115.079	-1.12133	0.341614	3.37259e-05	0.00232655	Pfkfb1	All_Genes
ENSMUSG00000023990	1978.31	0.324288	0.0899801	3.42675e-05	0.00235161	Tfeb	All_Genes
ENSMUSG00000020696	511.947	-0.536879	0.157556	3.68873e-05	0.00251828	Rffl	All_Genes
ENSMUSG00000079179	1170.21	0.319904	0.089373	3.82181e-05	0.00259568	Rab10os	All_Genes
ENSMUSG00000021710	852.899	-0.552461	0.164824	4.4635e-05	0.00301595	Nln	All_Genes
ENSMUSG00000078572	1055.81	-0.301004	0.0847683	4.57071e-05	0.00307263	Ndufaf8	All_Genes
ENSMUSG00000047749	606.341	0.482805	0.143219	4.73252e-05	0.00316526	Zc3hav1l	All_Genes
ENSMUSG00000029602	754.022	0.619745	0.187808	4.86534e-05	0.00322139	Rasal1	All_Genes
ENSMUSG00000086013	272.118	0.581911	0.174468	4.85714e-05	0.00322139	Gm15706	All_Genes
ENSMUSG00000029480	3200.96	0.356183	0.10296	4.97333e-05	0.00327643	Dhx37	All_Genes
ENSMUSG00000023348	633.461	-0.422295	0.124628	5.26478e-05	0.00345118	Trip6	All_Genes
ENSMUSG00000030156	2037.16	0.357015	0.103928	5.481e-05	0.00357513	Cd69	All_Genes
ENSMUSG00000021143	905.774	0.409648	0.122051	6.08785e-05	0.00395141	Pacs2	All_Genes
ENSMUSG00000022951	805.435	0.402485	0.119996	6.16722e-05	0.00397181	Rcan1	All_Genes
ENSMUSG00000044148	3380.77	-0.254985	0.0712864	6.17958e-05	0.00397181	1810030O07Rik	All_Genes
ENSMUSG00000025538	524.378	-0.48763	0.148448	6.25107e-05	0.00399826	Sumf2	All_Genes
ENSMUSG00000041679	98.9935	-1.33972	0.429845	6.37824e-05	0.00404037	Lrrc29	All_Genes
ENSMUSG00000052563	197.292	0.676484	0.211041	6.36765e-05	0.00404037	D930048N14Rik	All_Genes
ENSMUSG00000030615	817.39	-0.508349	0.155864	6.50763e-05	0.00410261	Tmem126a	All_Genes
ENSMUSG00000028689	456.967	-0.468715	0.141658	6.56086e-05	0.00411647	Ccdc163	All_Genes
ENSMUSG00000028124	1742.92	0.346379	0.102596	7.04009e-05	0.00439622	Gclm	All_Genes
ENSMUSG00000027306	20379.8	-0.304895	0.0893382	7.33281e-05	0.00455741	Nusap1	All_Genes
ENSMUSG00000036155	847.838	0.622581	0.197142	7.38141e-05	0.00456608	Mgat5	All_Genes
ENSMUSG00000022130	530.194	-0.438163	0.134473	7.57764e-05	0.00464386	Tgds	All_Genes
ENSMUSG00000079003	1345.17	0.470053	0.144844	7.57158e-05	0.00464386	Samd1	All_Genes
ENSMUSG00000025507	2856.27	0.351881	0.105275	7.9738e-05	0.0048416	Pidd1	All_Genes
ENSMUSG00000032966	17492.2	-0.237473	0.067435	7.94034e-05	0.0048416	Fkbp1a	All_Genes
ENSMUSG00000024588	1561.29	-0.418523	0.128725	8.20515e-05	0.00495922	Fech	All_Genes
ENSMUSG00000028549	901.965	-0.427896	0.132016	8.35698e-05	0.00502792	Itgb3bp	All_Genes
ENSMUSG00000022020	2416.38	-0.320289	0.0955462	8.51315e-05	0.0050986	Naa16	All_Genes
ENSMUSG00000022768	81.3244	1.15515	0.38064	8.94787e-05	0.00533471	Ccdc116	All_Genes
ENSMUSG00000025262	249.014	0.974204	0.322816	9.2254e-05	0.0054754	Fam120c	All_Genes
ENSMUSG00000005506	7126.1	0.345428	0.104702	9.34293e-05	0.00548123	Celf1	All_Genes
ENSMUSG00000021420	1420.01	-0.324129	0.0977486	9.39198e-05	0.00548123	Fars2	All_Genes
ENSMUSG00000024725	6459.13	-0.271762	0.0780672	9.44322e-05	0.00548123	Ostf1	All_Genes
ENSMUSG00000033773	954.531	-0.262346	0.0765618	9.34162e-05	0.00548123	Rpap2	All_Genes
ENSMUSG00000042650	3493.28	0.275327	0.0811192	9.43815e-05	0.00548123	Alkbh5	All_Genes
ENSMUSG00000037815	7274.89	0.253408	0.0738788	9.5084e-05	0.00549486	Ctnna1	All_Genes
ENSMUSG00000026547	21401.5	-0.229542	0.0668366	9.61461e-05	0.00553197	Tagln2	All_Genes
ENSMUSG00000006276	2478.68	-0.340802	0.103598	9.70358e-05	0.00555889	Eps15l1	All_Genes
ENSMUSG00000021993	2407.48	-0.36321	0.11155	9.78792e-05	0.005571	Mipep	All_Genes
ENSMUSG00000022199	180.12	0.874646	0.289707	9.8093e-05	0.005571	Slc22a17	All_Genes
ENSMUSG00000029478	443.027	0.533836	0.171136	0.000100742	0.00561878	Ncor2	All_Genes
ENSMUSG00000037622	376.295	0.657749	0.214539	0.000101066	0.00561878	Wdtc1	All_Genes
ENSMUSG00000038582	1294.32	0.371215	0.114345	0.00010065	0.00561878	Pptc7	All_Genes
ENSMUSG00000039747	1427.74	0.456246	0.14424	0.000100454	0.00561878	Orai2	All_Genes
ENSMUSG00000042265	297.071	-0.574996	0.186297	9.95041e-05	0.00561878	Trem1	All_Genes
ENSMUSG00000024948	8648.18	0.321283	0.0973389	0.000103222	0.00571448	Map4k2	All_Genes
ENSMUSG00000029521	1710.05	-0.352467	0.108294	0.000108434	0.00592832	Chek2	All_Genes
ENSMUSG00000040774	2256.76	-0.381357	0.119113	0.000108189	0.00592832	Cept1	All_Genes
ENSMUSG00000048232	178.528	0.837015	0.278058	0.000109078	0.0059389	Fbxo10	All_Genes
ENSMUSG00000001143	3772.46	0.399648	0.12579	0.000111159	0.0059743	Lman2l	All_Genes
ENSMUSG00000030714	1478.58	-0.293323	0.0883641	0.000111542	0.0059743	Sgf29	All_Genes
ENSMUSG00000034854	670.344	0.479951	0.153705	0.000110299	0.0059743	Mfsd12	All_Genes
ENSMUSG00000037933	1931.81	0.323245	0.0999193	0.000111264	0.0059743	Bicd2	All_Genes
ENSMUSG00000029012	1508.51	-0.327832	0.101363	0.000122035	0.00649175	Orc5	All_Genes
ENSMUSG00000075010	2118.19	-0.315098	0.0967277	0.000122188	0.00649175	AW112010	All_Genes
ENSMUSG00000070643	186.404	0.612142	0.20296	0.000123615	0.00654115	Sox13	All_Genes
ENSMUSG00000026154	766.938	-0.301345	0.0922203	0.000127196	0.00670373	Sdhaf4	All_Genes
ENSMUSG00000022641	1578.19	0.319915	0.0992912	0.000127838	0.00671075	Bbx	All_Genes
ENSMUSG00000036299	2605.89	-0.361322	0.113914	0.000129273	0.00675912	BC031181	All_Genes
ENSMUSG00000031066	3564.36	0.251156	0.0749329	0.000130346	0.00678831	Usp11	All_Genes
ENSMUSG00000006763	1804.82	-0.393628	0.125677	0.000132654	0.00688128	Saal1	All_Genes
ENSMUSG00000097971	8593.56	1.05874	0.367197	0.000138494	0.00713008	Gm26917	All_Genes
ENSMUSG00000034868	5770.24	-0.305367	0.0945638	0.000142407	0.007301	Myl12b	All_Genes
ENSMUSG00000020956	984.431	-0.4018	0.129971	0.000145481	0.0074297	Dtd2	All_Genes
ENSMUSG00000038421	529.012	-0.790115	0.27473	0.000148959	0.00757791	Fcrla	All_Genes
ENSMUSG00000032536	4479.46	0.354335	0.113049	0.000150999	0.00765215	Trak1	All_Genes
ENSMUSG00000061702	293.227	0.462175	0.152601	0.000153894	0.00776897	Tmem91	All_Genes
ENSMUSG00000049657	1171.61	0.435779	0.142758	0.000157248	0.00790802	Zbtb5	All_Genes
ENSMUSG00000004567	1521.52	0.376281	0.120499	0.000158709	0.00795114	Mcoln1	All_Genes
ENSMUSG00000072763	349.625	-0.66326	0.23075	0.000177169	0.00880895	5430403G16Rik	All_Genes
ENSMUSG00000017453	64.0792	-1.55889	0.583543	0.000184817	0.00912769	Pipox	All_Genes
ENSMUSG00000038145	1108.45	0.348292	0.113755	0.000184965	0.00912769	Snrk	All_Genes
ENSMUSG00000039163	466.062	-0.351119	0.114054	0.000185968	0.00914295	Cmc1	All_Genes
ENSMUSG00000038225	430.697	-0.446533	0.150075	0.000190965	0.00929022	Primpol	All_Genes
ENSMUSG00000054452	6984.66	0.306898	0.0975385	0.000189768	0.00929022	Aes	All_Genes
ENSMUSG00000078480	71.7091	-0.970996	0.351119	0.000198436	0.00961245	Mrpl48-ps	All_Genes
ENSMUSG00000106022	50.0788	1.11745	0.40508	0.000199343	0.00962105	Gm42929	All_Genes
ENSMUSG00000026546	63.7329	-1.29965	0.476301	0.000203982	0.00980898	Cfap45	All_Genes
ENSMUSG00000001445	2261.44	-0.27948	0.0884481	0.000207439	0.00993897	Mrpl10	All_Genes
ENSMUSG00000019832	549.548	-0.637175	0.225474	0.000209799	0.0100078	Rab32	All_Genes
ENSMUSG00000052557	232.913	0.677833	0.240396	0.000210395	0.0100078	Gan	All_Genes
ENSMUSG00000025086	902.397	-0.383476	0.128076	0.000214549	0.0101687	Trub1	All_Genes
ENSMUSG00000048578	21057.1	0.301812	0.097851	0.000215451	0.0101748	Mlec	All_Genes
ENSMUSG00000017830	801.69	-0.413219	0.139738	0.000216452	0.0101856	Dhx58	All_Genes
ENSMUSG00000026285	95.8961	-1.16986	0.431281	0.000220954	0.0103605	Pdcd1	All_Genes
ENSMUSG00000045827	493.951	-0.623373	0.222895	0.000223676	0.0104509	Serpinb9	All_Genes
ENSMUSG00000045273	2663.46	-0.372771	0.125763	0.000225576	0.0105024	Cenph	All_Genes
ENSMUSG00000029165	1153.46	0.421395	0.143954	0.000229112	0.0106295	Agbl5	All_Genes
ENSMUSG00000030577	1099.21	-0.664641	0.239925	0.00023813	0.0110091	Cd22	All_Genes
ENSMUSG00000034135	861.749	0.353453	0.118139	0.000245519	0.0113111	Sik3	All_Genes
ENSMUSG00000028243	1068.13	-0.430736	0.148744	0.000247205	0.011349	Ubxn2b	All_Genes
ENSMUSG00000034274	2170.9	-0.284237	0.0917732	0.000252136	0.0115352	Thoc5	All_Genes
ENSMUSG00000028634	249.885	0.778997	0.285659	0.000256453	0.0116921	Hivep3	All_Genes
ENSMUSG00000017778	4141.79	-0.307604	0.101484	0.000262348	0.0118723	Cox7c	All_Genes
ENSMUSG00000018666	6115.74	-0.259641	0.0826706	0.000261389	0.0118723	Cbx1	All_Genes
ENSMUSG00000068114	1756.94	0.334805	0.111802	0.000263109	0.0118723	Ccdc134	All_Genes
ENSMUSG00000026196	636.976	0.47846	0.168665	0.000265891	0.0119569	Bard1	All_Genes
ENSMUSG00000028223	669.083	-0.346665	0.116424	0.000267075	0.0119693	Decr1	All_Genes
ENSMUSG00000028567	1347.1	-0.299953	0.0987851	0.000275421	0.01226	Txndc12	All_Genes
ENSMUSG00000079111	2353.77	-0.226227	0.0710055	0.000279615	0.0124048	Kdelr2	All_Genes
ENSMUSG00000018287	3687.76	-0.223556	0.0703798	0.000281735	0.0124569	Spag7	All_Genes
ENSMUSG00000036636	1588.79	0.313512	0.104051	0.000288242	0.0127019	Clcn7	All_Genes
ENSMUSG00000029735	434.036	-0.473933	0.168963	0.000291169	0.0127456	Tpk1	All_Genes
ENSMUSG00000090258	722.852	-0.366934	0.125968	0.000290715	0.0127456	Churc1	All_Genes
ENSMUSG00000020190	18786.4	0.291597	0.0962243	0.00029807	0.0130045	Mknk2	All_Genes
ENSMUSG00000054008	504.39	0.811211	0.305889	0.000304954	0.0132173	Ndst1	All_Genes
ENSMUSG00000026127	4352.52	-0.247725	0.0806187	0.000313499	0.0134989	Imp4	All_Genes
ENSMUSG00000043505	1086.88	-0.323365	0.109661	0.000313135	0.0134989	Gimap5	All_Genes
ENSMUSG00000061436	707.138	0.440399	0.156774	0.000316858	0.0135991	Hipk2	All_Genes
ENSMUSG00000070730	1296.78	-0.263406	0.0862472	0.000323397	0.0138347	Rmdn3	All_Genes
ENSMUSG00000021190	1973.6	-0.416555	0.148545	0.000325492	0.0138792	Lgmn	All_Genes
ENSMUSG00000030166	665.316	-0.325314	0.110483	0.000328782	0.0139743	Rad52	All_Genes
ENSMUSG00000056204	483.293	0.411454	0.14577	0.000330062	0.0139836	Pgpep1	All_Genes
ENSMUSG00000040374	1619.79	-0.253359	0.0826799	0.000335028	0.0141033	Pex2	All_Genes
ENSMUSG00000063317	312.29	0.770464	0.295441	0.000344316	0.0144481	Usp31	All_Genes
ENSMUSG00000036977	1774.63	-0.314829	0.107509	0.000348855	0.0145921	Anapc10	All_Genes
ENSMUSG00000018983	5704.71	0.349259	0.121579	0.00035463	0.0147401	E2f2	All_Genes
ENSMUSG00000031960	9877.57	0.228624	0.0726052	0.000358046	0.0148353	Aars	All_Genes
ENSMUSG00000044149	225.579	-0.649112	0.248345	0.00036297	0.0149921	Nkrf	All_Genes
ENSMUSG00000024646	2209.96	-0.336135	0.11717	0.000369817	0.0151386	Cyb5a	All_Genes
ENSMUSG00000026576	3984.64	-0.353643	0.124791	0.000368563	0.0151386	Atp1b1	All_Genes
ENSMUSG00000033400	196.406	0.765724	0.296169	0.000371957	0.0151386	Agl	All_Genes
ENSMUSG00000050545	17.9289	-1.46378	0.584627	0.00037226	0.0151386	Fam228b	All_Genes
ENSMUSG00000072235	1552.78	0.239319	0.0783197	0.000372072	0.0151386	Tuba1a	All_Genes
ENSMUSG00000022389	815.106	0.300614	0.102738	0.000375713	0.0152127	Tef	All_Genes
ENSMUSG00000022722	505.87	-0.434085	0.158665	0.000379731	0.0152127	Arl6	All_Genes
ENSMUSG00000029456	152.617	-1.18853	0.488988	0.000379855	0.0152127	Acad10	All_Genes
ENSMUSG00000037791	1384.7	0.397435	0.143091	0.00037716	0.0152127	Phf12	All_Genes
ENSMUSG00000025915	2827.91	-0.293785	0.0999541	0.000384249	0.015342	Sgk3	All_Genes
ENSMUSG00000033931	2262.67	-0.286402	0.0974952	0.000386106	0.0153696	Rbm34	All_Genes
ENSMUSG00000035863	1310.37	0.399455	0.145755	0.000389975	0.0154769	Palm	All_Genes
ENSMUSG00000026222	2922.29	-0.320223	0.112081	0.000409586	0.0161964	Sp100	All_Genes
ENSMUSG00000097519	129.62	-1.02236	0.416174	0.000411793	0.0161964	4930558J18Rik	All_Genes
ENSMUSG00000021238	431.215	-0.64282	0.250187	0.000415113	0.0162387	Aldh6a1	All_Genes
ENSMUSG00000053113	156.337	0.728506	0.286745	0.000415333	0.0162387	Socs3	All_Genes
ENSMUSG00000108702	375.317	-0.359951	0.128715	0.00041958	0.0163562	Gm9333	All_Genes
ENSMUSG00000022300	6847.08	-0.269179	0.0911605	0.000424753	0.0164937	Dcaf13	All_Genes
ENSMUSG00000042757	2475.12	0.266414	0.0899283	0.000425936	0.0164937	Tmem108	All_Genes
ENSMUSG00000054150	905.759	0.407167	0.148947	0.000426864	0.0164937	Syne3	All_Genes
ENSMUSG00000032127	2672.97	-0.271664	0.0923458	0.000433764	0.0167113	Vps11	All_Genes
ENSMUSG00000009549	6806.04	-0.195117	0.0623084	0.000435178	0.0167169	Srp14	All_Genes
ENSMUSG00000029863	6514.46	-0.318235	0.112714	0.000437257	0.016748	Casp2	All_Genes
ENSMUSG00000026269	2501.83	0.275412	0.0939	0.000444991	0.0169948	Rnpepl1	All_Genes
ENSMUSG00000019883	114.944	-0.631852	0.247381	0.000451348	0.0171542	Echdc1	All_Genes
ENSMUSG00000046139	2062.11	0.305197	0.106274	0.000451769	0.0171542	Patl1	All_Genes
ENSMUSG00000020056	1292.06	-0.270075	0.0925461	0.000459071	0.0173814	Washc3	All_Genes
ENSMUSG00000042709	3707.78	-0.307184	0.107731	0.000462569	0.0174636	Atpaf2	All_Genes
ENSMUSG00000007777	954.181	-0.284023	0.0981563	0.000467736	0.0175581	0610009B22Rik	All_Genes
ENSMUSG00000021785	5729.27	-0.232301	0.0759444	0.000466436	0.0175581	Ngly1	All_Genes
ENSMUSG00000022351	4593.27	0.248333	0.083639	0.000472308	0.0176793	Sqle	All_Genes
ENSMUSG00000011837	1893.94	0.319926	0.11345	0.000485482	0.0180878	Snapc2	All_Genes
ENSMUSG00000031703	2712.2	-0.264244	0.0911781	0.000485965	0.0180878	Itfg1	All_Genes
ENSMUSG00000038569	100.402	0.836679	0.33999	0.000490061	0.0181888	Rad9b	All_Genes
ENSMUSG00000021665	1173.78	-0.287615	0.100335	0.000491907	0.0182061	Hexb	All_Genes
ENSMUSG00000041187	4971.39	-0.22653	0.0753882	0.000494389	0.0182467	Prkd2	All_Genes
ENSMUSG00000063659	706.099	0.318856	0.113778	0.00050473	0.0185763	Zbtb18	All_Genes
ENSMUSG00000036622	6408.3	0.277928	0.0967952	0.000514102	0.0188686	Atp13a2	All_Genes
ENSMUSG00000002107	10403.1	0.264826	0.0903496	0.000519353	0.018939	Celf2	All_Genes
ENSMUSG00000029254	1813.58	-0.388788	0.144878	0.000520629	0.018939	Stap1	All_Genes
ENSMUSG00000036398	1308.25	-0.288326	0.100776	0.00051948	0.018939	Ppp1r11	All_Genes
ENSMUSG00000049092	86.0497	0.998046	0.431156	0.000521771	0.018939	Gpr137c	All_Genes
ENSMUSG00000048988	104.991	0.901894	0.378371	0.000524663	0.0189917	Elfn1	All_Genes
ENSMUSG00000043411	2870.8	-0.28759	0.102432	0.000527812	0.0190533	Usp48	All_Genes
ENSMUSG00000045532	73.8223	0.955418	0.397761	0.000529397	0.0190583	C1ql1	All_Genes
ENSMUSG00000034390	2125.88	0.319809	0.114902	0.000534225	0.0191797	Cmip	All_Genes
ENSMUSG00000113211	141.577	0.63476	0.255941	0.000537191	0.0192338	4921525O09Rik	All_Genes
ENSMUSG00000030695	7651.67	-0.320398	0.115526	0.000547886	0.0195107	Aldoa	All_Genes
ENSMUSG00000041353	891.395	-0.368396	0.136707	0.000546772	0.0195107	Tmem29	All_Genes
ENSMUSG00000053581	786.724	0.410334	0.155053	0.000550168	0.0195391	Zfand2a	All_Genes
ENSMUSG00000021670	5926.37	0.236359	0.0801532	0.000558203	0.0197712	Hmgcr	All_Genes
ENSMUSG00000011008	466.536	-0.380714	0.142772	0.000567831	0.0199513	Mcoln2	All_Genes
ENSMUSG00000070953	2372.98	-0.242422	0.082567	0.000567688	0.0199513	Rabepk	All_Genes
ENSMUSG00000079659	2482.97	-0.229425	0.0775195	0.000567797	0.0199513	Tmem243	All_Genes
ENSMUSG00000026811	591.887	0.347118	0.128031	0.000571578	0.0200295	St6galnac6	All_Genes
ENSMUSG00000025656	159.427	-0.749208	0.310945	0.000578952	0.020186	Arhgef9	All_Genes
ENSMUSG00000042345	3888.37	0.275026	0.0967327	0.000580807	0.0201919	Ubash3a	All_Genes
ENSMUSG00000028581	18675.2	0.379573	0.142964	0.000589587	0.0204432	Laptm5	All_Genes
ENSMUSG00000036882	486.177	0.43473	0.167917	0.000591988	0.0204725	Arhgap33	All_Genes
ENSMUSG00000055675	206.335	0.964699	0.41568	0.000599004	0.0206609	Kbtbd11	All_Genes
ENSMUSG00000107136	42.8939	1.55509	0.681279	0.000604339	0.0207905	Gm42466	All_Genes
ENSMUSG00000106951	582.056	0.424898	0.164409	0.000607707	0.020852	5930430L01Rik	All_Genes
ENSMUSG00000020415	1180.66	-0.220774	0.0747513	0.000617948	0.0211483	Pttg1	All_Genes
ENSMUSG00000048310	936.291	-0.261988	0.0919004	0.000625216	0.0213416	Pskh1	All_Genes
ENSMUSG00000071454	1108.73	-0.303077	0.110151	0.000628399	0.0213948	Dtnb	All_Genes
ENSMUSG00000026585	715.784	-0.309279	0.113012	0.000630095	0.0213972	Kifap3	All_Genes
ENSMUSG00000022529	4006.26	0.289721	0.103919	0.000638219	0.0216174	Zfp263	All_Genes
ENSMUSG00000028758	1098.4	0.360317	0.136101	0.000646357	0.0217432	Kif17	All_Genes
ENSMUSG00000031166	535.115	0.620872	0.262797	0.000644713	0.0217432	Wdr13	All_Genes
ENSMUSG00000032463	2568.7	-0.235197	0.0871662	0.000646884	0.0217432	Faim	All_Genes
ENSMUSG00000112082	456.305	-0.397326	0.154112	0.000650567	0.0218114	Gm35035	All_Genes
ENSMUSG00000028927	758.558	0.48892	0.195654	0.000653773	0.0218632	Padi2	All_Genes
ENSMUSG00000024807	11036.9	0.200456	0.066925	0.00065764	0.0219369	Syvn1	All_Genes
ENSMUSG00000027339	1741.89	0.345411	0.129521	0.00066512	0.0221071	Rassf2	All_Genes
ENSMUSG00000052419	2732.68	-0.259954	0.0923386	0.000666098	0.0221071	2610001J05Rik	All_Genes
ENSMUSG00000025268	736.731	0.323001	0.119843	0.000670968	0.0222127	Maged2	All_Genes
ENSMUSG00000001415	3097.84	0.314173	0.116925	0.000677674	0.0223477	Smg5	All_Genes
ENSMUSG00000038604	7824.28	0.283363	0.102243	0.000678437	0.0223477	Ripor1	All_Genes
ENSMUSG00000019942	18046.7	-0.244982	0.0877762	0.000691752	0.0227295	Cdk1	All_Genes
ENSMUSG00000030498	823.687	0.447122	0.178675	0.000697268	0.0228537	Gas2	All_Genes
ENSMUSG00000098715	75.9446	0.666121	0.282877	0.000700265	0.022895	Gm28053	All_Genes
ENSMUSG00000026581	18374.5	-0.357853	0.136188	0.000705798	0.0230188	Sell	All_Genes
ENSMUSG00000053175	86.5549	0.757528	0.326449	0.000708887	0.0230624	Bcl3	All_Genes
ENSMUSG00000022089	1991.12	-0.237126	0.0820814	0.000715498	0.0232111	Bin3	All_Genes
ENSMUSG00000037944	1059.38	-0.359444	0.138351	0.000716978	0.0232111	Ccr7	All_Genes
ENSMUSG00000057411	2351.01	-0.24534	0.0864567	0.000722056	0.0233182	Fam173a	All_Genes
ENSMUSG00000040940	15852.3	0.226083	0.0775577	0.000737926	0.0237724	Arhgef1	All_Genes
ENSMUSG00000013622	1656.9	-0.205203	0.0700503	0.000741425	0.0238269	Atraid	All_Genes
ENSMUSG00000028464	147.87	0.606168	0.256585	0.000761652	0.0243754	Tpm2	All_Genes
ENSMUSG00000108722	201.603	-0.61788	0.263976	0.000762195	0.0243754	Gm34225	All_Genes
ENSMUSG00000079853	61.2232	-1.01716	0.474936	0.00078422	0.0250191	Klra1	All_Genes
ENSMUSG00000042423	183.601	0.556007	0.235291	0.00079957	0.0253859	Fbrs	All_Genes
ENSMUSG00000062110	992.512	-0.268768	0.0974101	0.000798956	0.0253859	Scfd2	All_Genes
ENSMUSG00000006273	4668.35	-0.193978	0.0659261	0.000814346	0.0257086	Atp6v1b2	All_Genes
ENSMUSG00000028655	80.3116	0.979942	0.437017	0.00081559	0.0257086	Mfsd2a	All_Genes
ENSMUSG00000039795	890.003	-0.323642	0.123649	0.000824166	0.025917	Zfand1	All_Genes
ENSMUSG00000027489	43.8789	1.09527	0.502694	0.000830053	0.0260225	Necab3	All_Genes
ENSMUSG00000041258	446.383	0.52212	0.2196	0.000831472	0.0260225	Zfp236	All_Genes
ENSMUSG00000024810	125.597	-0.937862	0.426924	0.000837274	0.0261235	Il33	All_Genes
ENSMUSG00000039621	3582.57	0.415691	0.168239	0.000838663	0.0261235	Prex1	All_Genes
ENSMUSG00000097729	122.71	0.949897	0.433703	0.000851439	0.0264589	2310015A10Rik	All_Genes
ENSMUSG00000024132	1612.63	-0.246983	0.088867	0.000855077	0.0264919	Eci1	All_Genes
ENSMUSG00000031221	1243.09	-0.283023	0.106797	0.000856523	0.0264919	Igbp1	All_Genes
ENSMUSG00000055302	13928.1	-0.213554	0.0744072	0.000858839	0.0265013	Mrfap1	All_Genes
ENSMUSG00000028645	780.597	-0.289145	0.108792	0.000863538	0.0265221	Slc2a1	All_Genes
ENSMUSG00000036402	1456.57	-0.392465	0.158675	0.000862336	0.0265221	Gng12	All_Genes
ENSMUSG00000018189	11319.4	-0.286059	0.108971	0.000871824	0.0265292	Uchl5	All_Genes
ENSMUSG00000018196	994.712	-0.264581	0.0980033	0.000870126	0.0265292	Glrx2	All_Genes
ENSMUSG00000027430	2102.7	-0.233264	0.0842639	0.0008695	0.0265292	Dtd1	All_Genes
ENSMUSG00000041390	244.214	0.45233	0.186953	0.000876305	0.0266041	Mdfic	All_Genes
ENSMUSG00000018931	829.435	0.3955	0.158685	0.000883584	0.0266201	Natd1	All_Genes
ENSMUSG00000033004	1125.29	0.445795	0.184426	0.000886933	0.0266201	Mycbp2	All_Genes
ENSMUSG00000053411	394.844	0.410559	0.167268	0.000881285	0.0266201	Cbx7	All_Genes
ENSMUSG00000024654	2980.97	-0.241804	0.0870895	0.000890444	0.0266515	Asrgl1	All_Genes
ENSMUSG00000043257	847.181	0.30031	0.11319	0.000892026	0.0266515	Pigv	All_Genes
ENSMUSG00000092060	280.85	0.508581	0.21732	0.000894768	0.026673	Bend4	All_Genes
ENSMUSG00000063646	3194.12	0.285005	0.104815	0.000900928	0.026796	Jakmip1	All_Genes
ENSMUSG00000028068	3314.9	0.34449	0.135598	0.000906358	0.026847	Iqgap3	All_Genes
ENSMUSG00000032598	513.562	0.329928	0.128253	0.000906718	0.026847	Nckipsd	All_Genes
ENSMUSG00000024968	1410.76	0.322687	0.125344	0.000919967	0.0270851	Rcor2	All_Genes
ENSMUSG00000035900	3791.47	0.310489	0.119078	0.000920928	0.0270851	Gramd4	All_Genes
ENSMUSG00000044636	238.118	0.481772	0.204118	0.000917469	0.0270851	Csrnp2	All_Genes
ENSMUSG00000030539	352.569	0.499709	0.212518	0.000931753	0.0273425	Sema4b	All_Genes
ENSMUSG00000048271	1311.11	0.412856	0.168914	0.000941182	0.0275578	Rbm33	All_Genes
ENSMUSG00000046909	1157.43	-0.327987	0.128503	0.000953676	0.0278617	Tefm	All_Genes
ENSMUSG00000021103	1292.9	-0.310752	0.120562	0.000966533	0.0281749	Mnat1	All_Genes
ENSMUSG00000022540	651.287	-0.317209	0.123594	0.000970199	0.0282193	Rogdi	All_Genes
ENSMUSG00000062661	726.842	0.49785	0.214551	0.000999086	0.0289318	Ncs1	All_Genes
ENSMUSG00000064215	3805.37	-0.271991	0.102077	0.000998159	0.0289318	Ifi27	All_Genes
ENSMUSG00000018076	1159.27	0.472258	0.202252	0.0010143	0.0291163	Med13l	All_Genes
ENSMUSG00000019792	1846.29	-0.303992	0.120349	0.00101368	0.0291163	Trmt11	All_Genes
ENSMUSG00000031938	258.296	-0.403208	0.167787	0.00101134	0.0291163	4931406C07Rik	All_Genes
ENSMUSG00000028890	800.193	0.296403	0.11372	0.00101889	0.0291846	Mtf1	All_Genes
ENSMUSG00000006463	698.445	0.400661	0.167627	0.00107268	0.0306587	Zdhhc24	All_Genes
ENSMUSG00000028337	4958.11	0.272777	0.10199	0.00107936	0.0307827	Coro2a	All_Genes
ENSMUSG00000039599	1204.31	-0.280348	0.107606	0.00108578	0.030899	Fam149b	All_Genes
ENSMUSG00000034593	1313.19	0.444634	0.192408	0.00109338	0.0310482	Myo5a	All_Genes
ENSMUSG00000002345	469.917	-0.368755	0.152021	0.00109781	0.0311069	Borcs8	All_Genes
ENSMUSG00000090841	8976.87	-0.197911	0.0698967	0.00110971	0.0312612	Myl6	All_Genes
ENSMUSG00000094483	1894.96	0.270261	0.10282	0.00110751	0.0312612	Purb	All_Genes
ENSMUSG00000116895	51.2943	-0.626853	0.287237	0.00111822	0.031415	Gm3435	All_Genes
ENSMUSG00000001065	597.654	0.325816	0.130636	0.00112516	0.0315379	Zfp276	All_Genes
ENSMUSG00000087574	217.07	0.510303	0.226513	0.00112738	0.0315379	C030037D09Rik	All_Genes
ENSMUSG00000035215	2049.92	-0.25335	0.0951839	0.00113655	0.0317271	Lsm7	All_Genes
ENSMUSG00000002028	840.961	0.476008	0.20557	0.00114512	0.0318987	Kmt2a	All_Genes
ENSMUSG00000054226	859.127	-0.33369	0.135757	0.00114803	0.0319124	Tprkb	All_Genes
ENSMUSG00000052605	188.767	-0.627959	0.295086	0.00115175	0.0319482	Isoc2b	All_Genes
ENSMUSG00000110902	92.2776	0.559399	0.254572	0.00115578	0.0319928	Gm33104	All_Genes
ENSMUSG00000059316	349.054	0.407743	0.173486	0.00116864	0.0322133	Slc27a4	All_Genes
ENSMUSG00000107336	98.5642	0.54785	0.248049	0.00116672	0.0322133	Gm43461	All_Genes
ENSMUSG00000029776	10232.3	-0.221533	0.0807384	0.00117336	0.0322761	Hibadh	All_Genes
ENSMUSG00000085971	325.835	0.462702	0.20232	0.00118188	0.0324427	Gm15411	All_Genes
ENSMUSG00000047959	1481.8	0.358517	0.148325	0.00119281	0.0326348	Kcna3	All_Genes
ENSMUSG00000021196	3827.5	-0.228811	0.0835169	0.00121214	0.0329983	Pfkp	All_Genes
ENSMUSG00000038299	5313.29	-0.297376	0.118632	0.0012097	0.0329983	Wdr36	All_Genes
ENSMUSG00000043419	925.764	0.36969	0.155166	0.00121706	0.033064	Chd3os	All_Genes
ENSMUSG00000002763	2000.8	-0.273588	0.105696	0.00123938	0.033532	Pex6	All_Genes
ENSMUSG00000085385	311.521	-0.42342	0.184451	0.00124301	0.0335612	Snhg17	All_Genes
ENSMUSG00000032396	2098.07	0.301116	0.119292	0.00124947	0.0336115	Dis3l	All_Genes
ENSMUSG00000062031	1200.99	-0.301362	0.120224	0.00124997	0.0336115	Pgghg	All_Genes
ENSMUSG00000076613	33778.8	0.358855	0.147679	0.00125931	0.0337937	Ighg2b	All_Genes
ENSMUSG00000039275	1869.3	0.395724	0.171693	0.00127223	0.034071	Foxk2	All_Genes
ENSMUSG00000027397	1745.16	0.239131	0.090293	0.00128163	0.0342532	Slc20a1	All_Genes
ENSMUSG00000001517	5361.04	0.264191	0.102015	0.00130738	0.034354	Foxm1	All_Genes
ENSMUSG00000012123	197.421	-0.516722	0.237757	0.00129829	0.034354	Crybg2	All_Genes
ENSMUSG00000022427	6994.46	-0.2061	0.0745379	0.00130875	0.034354	Tomm22	All_Genes
ENSMUSG00000030095	3394.38	0.22286	0.0824371	0.00130887	0.034354	Tmem43	All_Genes
ENSMUSG00000030649	340.642	-0.317543	0.129082	0.00128875	0.034354	Anapc15	All_Genes
ENSMUSG00000030678	6213.35	0.259777	0.10008	0.0013037	0.034354	Maz	All_Genes
ENSMUSG00000032688	659.981	-0.535235	0.247266	0.00129358	0.034354	Malt1	All_Genes
ENSMUSG00000051339	2047.87	0.40118	0.174087	0.00129143	0.034354	2900026A02Rik	All_Genes
ENSMUSG00000068758	117.875	-0.725232	0.354528	0.00130026	0.034354	Il3ra	All_Genes
ENSMUSG00000038503	3282.42	-0.22885	0.0854539	0.00131636	0.0344134	Mesd	All_Genes
ENSMUSG00000019806	774.862	-0.332112	0.137491	0.00131918	0.0344173	Aig1	All_Genes
ENSMUSG00000041881	3963.41	-0.222784	0.0821521	0.00132173	0.0344173	Ndufa7	All_Genes
ENSMUSG00000042744	368.789	0.528944	0.245395	0.00132513	0.0344377	Hectd4	All_Genes
ENSMUSG00000000711	1644.19	0.354566	0.149587	0.00133102	0.0344548	Rab5b	All_Genes
ENSMUSG00000021959	490.224	0.491067	0.223522	0.00133098	0.0344548	Lats2	All_Genes
ENSMUSG00000031753	2314.16	-0.210748	0.077552	0.00133791	0.0345419	Cog4	All_Genes
ENSMUSG00000034634	11137.3	0.29976	0.120419	0.00134225	0.0345419	Ly6d	All_Genes
ENSMUSG00000073775	1418.5	-0.244233	0.093135	0.00134151	0.0345419	Kti12	All_Genes
ENSMUSG00000001829	2502.32	-0.281577	0.113251	0.00134593	0.0345692	Clpb	All_Genes
ENSMUSG00000022828	1763.3	-0.283083	0.11212	0.00135178	0.0346519	Gtf2e1	All_Genes
ENSMUSG00000041870	23628.6	0.169814	0.0570622	0.00135455	0.0346555	Ankrd13a	All_Genes
ENSMUSG00000056531	1126.47	-0.357697	0.15208	0.00136316	0.0348081	Ccdc18	All_Genes
ENSMUSG00000015247	4335.28	-0.255952	0.0982449	0.00136631	0.0348211	Nipsnap3b	All_Genes
ENSMUSG00000078653	132.728	0.516489	0.239248	0.00137284	0.03492	Cntd1	All_Genes
ENSMUSG00000025040	3648.92	-0.392667	0.173677	0.00138901	0.0352631	Fundc1	All_Genes
ENSMUSG00000021023	1143.54	-0.381102	0.165737	0.00139651	0.0353176	1110008L16Rik	All_Genes
ENSMUSG00000034334	175.343	-0.540511	0.256827	0.00139479	0.0353176	Fam151b	All_Genes
ENSMUSG00000037426	1426.09	0.352875	0.150463	0.00140189	0.0353366	Depdc5	All_Genes
ENSMUSG00000076441	2776.44	0.246	0.0946991	0.00140263	0.0353366	Ass1	All_Genes
ENSMUSG00000079606	130.304	-0.88128	0.452324	0.00141676	0.0356244	Gm595	All_Genes
ENSMUSG00000025366	12606.2	0.247619	0.0886759	0.00142593	0.0357188	Esyt1	All_Genes
ENSMUSG00000035764	2267	0.27572	0.109464	0.00142573	0.0357188	Fbxo45	All_Genes
ENSMUSG00000040033	1567.31	0.275277	0.108735	0.00143743	0.0359384	Stat2	All_Genes
ENSMUSG00000032641	212.583	0.396459	0.174777	0.00144698	0.0361088	Gpr19	All_Genes
ENSMUSG00000001151	1622.71	0.349488	0.149211	0.00145738	0.0362434	Pcnt	All_Genes
ENSMUSG00000028514	1368.83	0.323452	0.134352	0.00146063	0.0362434	Usp24	All_Genes
ENSMUSG00000026879	22961.4	0.296021	0.121629	0.0014885	0.0367965	Gsn	All_Genes
ENSMUSG00000098183	94.2468	0.757639	0.38252	0.00148798	0.0367965	Gm27010	All_Genes
ENSMUSG00000025068	3876.88	-0.289792	0.118035	0.0014938	0.0368584	Gsto1	All_Genes
ENSMUSG00000020166	11536.5	-0.188504	0.068475	0.00151467	0.0373033	Cnot2	All_Genes
ENSMUSG00000068580	1929.27	-0.267994	0.107883	0.00155344	0.0381156	Zfyve19	All_Genes
ENSMUSG00000030839	649.68	-0.29134	0.119529	0.00158198	0.0387437	Sergef	All_Genes
ENSMUSG00000022125	1763.69	-0.237194	0.0912796	0.0015942	0.0387551	Cln5	All_Genes
ENSMUSG00000030246	207.427	-0.568241	0.280468	0.00159218	0.0387551	Ldhb	All_Genes
ENSMUSG00000040212	2136.63	0.245761	0.0956392	0.00159272	0.0387551	Emp3	All_Genes
ENSMUSG00000046480	1134.56	0.524955	0.2521	0.00158667	0.0387551	Scn4b	All_Genes
ENSMUSG00000025780	642.755	-0.423888	0.194339	0.00160212	0.0388756	Itih5	All_Genes
ENSMUSG00000000326	1993.1	-0.239289	0.0928232	0.00160653	0.0389111	Comt	All_Genes
ENSMUSG00000026029	8106.85	-0.270752	0.109071	0.00162644	0.0393211	Casp8	All_Genes
ENSMUSG00000035206	1646.12	0.246255	0.0968793	0.00164212	0.0396275	Sppl2b	All_Genes
ENSMUSG00000030706	2770.37	-0.277874	0.115439	0.00169186	0.040753	Mrpl48	All_Genes
ENSMUSG00000028657	13049.4	-0.210913	0.0795217	0.00170243	0.0409328	Ppt1	All_Genes
ENSMUSG00000002083	87.5769	0.744599	0.39202	0.00172061	0.0410184	Bbc3	All_Genes
ENSMUSG00000006369	129.442	0.820586	0.486259	0.00171722	0.0410184	Fbln1	All_Genes
ENSMUSG00000020700	3096.41	0.293104	0.118448	0.00172095	0.0410184	Map3k3	All_Genes
ENSMUSG00000021621	1047.02	-0.246332	0.0977235	0.00171096	0.0410184	Zcchc9	All_Genes
ENSMUSG00000028563	1428.97	-0.289555	0.120354	0.00172155	0.0410184	Tm2d1	All_Genes
ENSMUSG00000030960	2040.37	-0.252057	0.101088	0.00172657	0.0410638	Eef1akmt2	All_Genes
ENSMUSG00000021418	998.318	-0.324834	0.14053	0.00173783	0.0412571	Rpp40	All_Genes
ENSMUSG00000074785	478.662	0.548508	0.272852	0.00174468	0.0413452	Plxnc1	All_Genes
ENSMUSG00000032116	18544.4	-0.204177	0.0759053	0.00176115	0.0416606	Stt3a	All_Genes
ENSMUSG00000035095	375.068	0.461216	0.219771	0.00177001	0.0417951	Fam167a	All_Genes
ENSMUSG00000048489	37.9785	-1.03571	0.607784	0.00178595	0.0420961	8430408G22Rik	All_Genes
ENSMUSG00000026657	627.736	0.391178	0.183658	0.0017907	0.0421325	Frmd4a	All_Genes
ENSMUSG00000091277	185.254	-0.401107	0.185045	0.00180907	0.042489	Gm1818	All_Genes
ENSMUSG00000045980	444.025	0.308566	0.132469	0.00183964	0.0431301	Tmem104	All_Genes
ENSMUSG00000059336	584.204	-0.387853	0.17627	0.00184806	0.0432506	Slc14a1	All_Genes
ENSMUSG00000022092	3316.61	-0.250846	0.100683	0.00185594	0.043358	Ppp3cc	All_Genes
ENSMUSG00000025408	284.051	0.311264	0.133665	0.00186124	0.0434048	Ddit3	All_Genes
ENSMUSG00000022205	16156.9	-0.274632	0.114279	0.00189141	0.0440303	Sub1	All_Genes
ENSMUSG00000021646	1072.12	-0.25983	0.105872	0.00189781	0.0441015	Mccc2	All_Genes
ENSMUSG00000000365	73.1587	-0.916948	0.525703	0.00190336	0.0441195	Rnf17	All_Genes
ENSMUSG00000014030	2205.86	0.387659	0.183775	0.00191198	0.0441195	Pax5	All_Genes
ENSMUSG00000044700	2069.6	0.272327	0.113143	0.00190943	0.0441195	Tmem201	All_Genes
ENSMUSG00000036928	537.981	0.407679	0.192508	0.00195534	0.0449625	Stag3	All_Genes
ENSMUSG00000030036	10599.8	-0.188999	0.0723332	0.00196613	0.0449752	Mogs	All_Genes
ENSMUSG00000038374	8960.07	-0.164377	0.0594215	0.00195934	0.0449752	Rbm8a	All_Genes
ENSMUSG00000070639	1223.06	0.378119	0.17587	0.00196611	0.0449752	Lrrc8b	All_Genes
ENSMUSG00000033792	343.393	0.67066	0.367596	0.00198793	0.0453951	Atp7a	All_Genes
ENSMUSG00000021133	740.33	0.458732	0.226612	0.0019979	0.0454652	Susd6	All_Genes
ENSMUSG00000050312	938.28	-0.312149	0.136396	0.00199694	0.0454652	Nsun3	All_Genes
ENSMUSG00000021967	2600.58	-0.206244	0.0787526	0.00200558	0.0455612	Mrpl57	All_Genes
ENSMUSG00000074071	132.201	0.645389	0.366575	0.00203043	0.0460463	Fam169b	All_Genes
ENSMUSG00000031730	1625.27	-0.23734	0.0959249	0.00205031	0.0464174	Dhodh	All_Genes
ENSMUSG00000020846	319.334	0.503601	0.256869	0.00205815	0.0464876	Rflnb	All_Genes
ENSMUSG00000027580	381.362	0.4009	0.190127	0.00206047	0.0464876	Helz2	All_Genes
ENSMUSG00000039958	468.853	-0.279203	0.118541	0.00207006	0.0465445	Etfbkmt	All_Genes
ENSMUSG00000097352	216.364	-0.554835	0.291782	0.00206706	0.0465445	C920009B18Rik	All_Genes
ENSMUSG00000001349	317.934	0.463002	0.231726	0.00208973	0.0469069	Cnn1	All_Genes
ENSMUSG00000095677	2160.6	-0.183019	0.0688384	0.00209549	0.0469561	Dynlt1f	All_Genes
ENSMUSG00000035351	5251.7	-0.2489	0.101908	0.00210435	0.0469947	Nup37	All_Genes
ENSMUSG00000097141	80.2573	0.523287	0.269176	0.00210425	0.0469947	Gm10524	All_Genes
ENSMUSG00000058267	7875.27	-0.244582	0.0999817	0.00211525	0.0471582	Mrps14	All_Genes
ENSMUSG00000030019	2991.54	0.268213	0.112321	0.00211921	0.0471667	Fbxl14	All_Genes
ENSMUSG00000035529	2889.87	0.222206	0.0885957	0.00212363	0.0471855	Prdm4	All_Genes
ENSMUSG00000026278	3688.84	0.296333	0.127928	0.00212892	0.0472234	Bok	All_Genes
ENSMUSG00000034484	43872	-0.236879	0.100445	0.0021555	0.0477325	Snx2	All_Genes
ENSMUSG00000029802	1095.99	-0.25578	0.10664	0.00223339	0.0493745	Abcg2	All_Genes
ENSMUSG00000019087	6482.44	-0.202383	0.0774968	0.00225606	0.0496374	Atp6ap1	All_Genes
ENSMUSG00000002699	355.769	-0.565927	0.307903	0.00228793	0.0498394	Lcp2	All_Genes
ENSMUSG00000027678	1512.71	0.414151	0.203936	0.00228847	0.0498394	Ncoa3	All_Genes
ENSMUSG00000043391	478.928	0.458351	0.235782	0.00228078	0.0498394	2510009E07Rik	All_Genes
ENSMUSG00000044155	5618.34	-0.263504	0.110513	0.00228697	0.0498394	Lsm8	All_Genes
ENSMUSG00000053168	67.0843	-0.751436	0.433437	0.00227647	0.0498394	9030619P08Rik	All_Genes
ENSMUSG00000061904	16615.7	-0.205068	0.0802699	0.00227724	0.0498394	Slc25a3	All_Genes
ENSMUSG00000021537	6608.21	-0.261566	0.11216	0.00230432	0.049893	Cetn3	All_Genes
ENSMUSG00000039686	3346.5	0.217154	0.0861813	0.00230141	0.049893	Zer1	All_Genes
ENSMUSG00000078867	50.2014	-0.820016	0.498981	0.00230082	0.049893	Gm14418	All_Genes
ENSMUSG00000097908	666.107	0.433718	0.21784	0.00230607	0.049893	4933404O12Rik	All_Genes
ENSMUSG00000038398	1937.56	-0.182923	0.0699004	0.00231144	0.0499271	Upf3a	All_Genes
ENSMUSG00000020737	20982	-0.215531	0.0862711	0.00232699	0.0499422	Jpt1	All_Genes
ENSMUSG00000029071	1600.1	0.27337	0.118618	0.00231938	0.0499422	Dvl1	All_Genes
ENSMUSG00000034445	11438.7	0.219081	0.0875757	0.00232555	0.0499422	Cyb561a3	All_Genes
ENSMUSG00000043587	978.881	0.26402	0.111519	0.0023273	0.0499422	Pxylp1	All_Genes
ENSMUSG00000006362	1255.82	0.324417	0.147232	0.00233157	0.0499524	Cbfa2t3	All_Genes
ENSMUSG00000021392	1641.48	-0.260887	0.112264	0.00234726	0.050207	Nol8	All_Genes
ENSMUSG00000020457	14515.6	-0.247895	0.103641	0.00236334	0.0502086	Drg1	All_Genes
ENSMUSG00000034206	619.934	0.498554	0.264666	0.00236639	0.0502086	Polq	All_Genes
ENSMUSG00000042978	3944.13	0.36765	0.171936	0.00236151	0.0502086	Sbk1	All_Genes
ENSMUSG00000051124	2256.93	-0.261345	0.110539	0.002354	0.0502086	Gimap9	All_Genes
ENSMUSG00000015980	374.411	0.322319	0.147227	0.00239173	0.0502624	Lrrc27	All_Genes
ENSMUSG00000021973	4148.22	-0.210531	0.0839942	0.00238989	0.0502624	Micu2	All_Genes
ENSMUSG00000023452	1134.77	-0.241592	0.100534	0.0023816	0.0502624	Pisd	All_Genes
ENSMUSG00000026885	992.293	0.374787	0.180501	0.00239563	0.0502624	Ttll11	All_Genes
ENSMUSG00000028544	58.7646	-0.170164	0.451608	0.00238032	0.0502624	Slc5a9	All_Genes
ENSMUSG00000068523	5845.98	-0.222508	0.0901804	0.00239328	0.0502624	Gng5	All_Genes
ENSMUSG00000097154	308.196	-0.456732	0.236789	0.00237951	0.0502624	Gm26510	All_Genes
ENSMUSG00000034156	200.333	0.754044	0.457081	0.00241894	0.0506573	Tspoap1	All_Genes
ENSMUSG00000079339	368.165	-0.497647	0.265652	0.00242214	0.0506573	Ifit1bl1	All_Genes
ENSMUSG00000023175	11028.2	-0.146999	0.0564649	0.00245294	0.0511391	Bsg	All_Genes
ENSMUSG00000104973	116.64	0.771436	0.480261	0.00245048	0.0511391	A530041M06Rik	All_Genes
ENSMUSG00000027167	1263.97	-0.255067	0.106564	0.00246794	0.0513705	Elp4	All_Genes
ENSMUSG00000020868	643.623	0.293651	0.129648	0.00247632	0.0513716	Xylt2	All_Genes
ENSMUSG00000030443	242.458	0.503081	0.270572	0.00247968	0.0513716	Zfp583	All_Genes
ENSMUSG00000030930	771.533	0.434719	0.222485	0.0024751	0.0513716	Chst15	All_Genes
ENSMUSG00000022774	4252.93	-0.216536	0.0871374	0.00248883	0.0514656	Ncbp2	All_Genes
ENSMUSG00000025925	3609.27	-0.245871	0.10361	0.00249214	0.0514656	Terf1	All_Genes
ENSMUSG00000045410	1517.58	-0.277977	0.121802	0.00249594	0.0514656	Akr1e1	All_Genes
ENSMUSG00000030983	5850.62	-0.218418	0.0893966	0.00250629	0.0515982	Bccip	All_Genes
ENSMUSG00000034312	219.458	0.473629	0.249607	0.00251362	0.0516684	Iqsec1	All_Genes
ENSMUSG00000015961	9593.84	-0.222704	0.089688	0.00252678	0.0517546	Adss	All_Genes
ENSMUSG00000029209	772.419	-0.246814	0.103894	0.00252411	0.0517546	Gnpda2	All_Genes
ENSMUSG00000068417	981.207	-0.334195	0.157285	0.00253745	0.0517546	Pnp2	All_Genes
ENSMUSG00000091931	1044.11	0.232489	0.0960661	0.00253445	0.0517546	Gon7	All_Genes
ENSMUSG00000029416	1515.49	0.259679	0.112058	0.00254469	0.0518219	Slc15a4	All_Genes
ENSMUSG00000021715	1300.4	-0.244638	0.102665	0.00255147	0.0518799	Cwc27	All_Genes
ENSMUSG00000020003	2923.5	-0.264703	0.114544	0.00257074	0.0519511	Pex7	All_Genes
ENSMUSG00000022550	754.649	-0.366628	0.178646	0.00256885	0.0519511	Adck5	All_Genes
ENSMUSG00000032280	2044.97	0.358597	0.173967	0.00257029	0.0519511	Tle3	All_Genes
ENSMUSG00000030657	366.1	0.466465	0.245113	0.00259185	0.0522035	Xylt1	All_Genes
ENSMUSG00000046982	1108.82	0.347561	0.165783	0.00259512	0.0522035	Tshz1	All_Genes
ENSMUSG00000062580	3584.09	-0.250345	0.107575	0.00262007	0.0525449	Timm17a	All_Genes
ENSMUSG00000025422	134.695	0.565071	0.322085	0.00264739	0.0529478	Agap2	All_Genes
ENSMUSG00000030527	324.477	0.472192	0.254005	0.00264819	0.0529478	Crtc3	All_Genes
ENSMUSG00000013707	640.744	-0.305384	0.140323	0.00268894	0.0536654	Tnfaip8l2	All_Genes
ENSMUSG00000024726	5505.48	-0.251495	0.108705	0.00269223	0.0536654	Carnmt1	All_Genes
ENSMUSG00000027562	9029.21	-0.285032	0.127863	0.00270042	0.0537473	Car2	All_Genes
ENSMUSG00000001642	12414.2	-0.175711	0.0639201	0.00271443	0.0537825	Akr1b3	All_Genes
ENSMUSG00000029911	5066.92	-0.222071	0.0911244	0.00271259	0.0537825	Ssbp1	All_Genes
ENSMUSG00000047867	9294.09	-0.277501	0.122238	0.00273023	0.0540143	Gimap6	All_Genes
ENSMUSG00000025867	2503.61	0.381306	0.190882	0.00273556	0.0540295	Cplx2	All_Genes
ENSMUSG00000070284	903.964	-0.225118	0.0932604	0.0027392	0.0540295	Gmppb	All_Genes
ENSMUSG00000032193	1637.95	0.380863	0.190619	0.00275109	0.0541021	Ldlr	All_Genes
ENSMUSG00000024212	2792.3	0.221746	0.0911364	0.00277025	0.0541509	Mllt1	All_Genes
ENSMUSG00000031198	1950.5	-0.231503	0.0972315	0.00276409	0.0541509	Fundc2	All_Genes
ENSMUSG00000032525	2215.16	0.269636	0.118423	0.0027711	0.0541509	Nktr	All_Genes
ENSMUSG00000032946	18236.5	0.204455	0.0822939	0.00277413	0.0541509	Rasgrp2	All_Genes
ENSMUSG00000079020	1466.72	0.294995	0.13438	0.00276172	0.0541509	Slc45a4	All_Genes
ENSMUSG00000041801	605.993	0.391432	0.201902	0.00278144	0.0542134	Phlda3	All_Genes
ENSMUSG00000044730	468.74	0.264648	0.115948	0.00278664	0.0542345	9930104L06Rik	All_Genes
ENSMUSG00000032053	16889.2	-0.202815	0.0809279	0.00279159	0.0542506	Pou2af1	All_Genes
ENSMUSG00000063800	5484.96	-0.173988	0.0669642	0.00280829	0.054495	Prpf38a	All_Genes
ENSMUSG00000004127	1159.25	-0.25222	0.109041	0.00282724	0.0547314	Trmt10a	All_Genes
ENSMUSG00000021596	947.223	-0.33011	0.15944	0.00282933	0.0547314	Mctp1	All_Genes
ENSMUSG00000025766	582.087	-0.410041	0.213317	0.00283294	0.0547314	D3Ertd751e	All_Genes
ENSMUSG00000034361	1864.4	0.300814	0.137977	0.00285978	0.0550884	Cpne2	All_Genes
ENSMUSG00000090000	1896.76	-0.309462	0.144917	0.00286824	0.0551707	Ier3ip1	All_Genes
ENSMUSG00000031347	4631.56	-0.192783	0.0753471	0.00287845	0.0552229	Cetn2	All_Genes
ENSMUSG00000031935	3175.37	-0.202973	0.0820263	0.00288353	0.0552229	Med17	All_Genes
ENSMUSG00000107000	113.564	0.714526	0.448305	0.00288163	0.0552229	Gm43481	All_Genes
ENSMUSG00000024393	769.807	0.384404	0.19635	0.00289712	0.0554026	Prrc2a	All_Genes
ENSMUSG00000040209	522.407	0.325212	0.155857	0.0029568	0.0564621	Zfp704	All_Genes
ENSMUSG00000033826	702.848	0.312475	0.148006	0.00296979	0.0566279	Dnah8	All_Genes
ENSMUSG00000020922	1858.26	-0.209083	0.0870088	0.00297915	0.0567244	Lsm12	All_Genes
ENSMUSG00000037795	1350.5	0.407376	0.21506	0.00300949	0.0572193	N4bp2	All_Genes
ENSMUSG00000000782	421.667	0.459466	0.253727	0.00303219	0.0574024	Tcf7	All_Genes
ENSMUSG00000034216	1241.46	0.290407	0.133803	0.00302612	0.0574024	Vps18	All_Genes
ENSMUSG00000031633	8111.18	-0.228328	0.0957794	0.00306728	0.0579004	Slc25a4	All_Genes
ENSMUSG00000034471	340.128	0.430846	0.236172	0.0030659	0.0579004	Caskin2	All_Genes
ENSMUSG00000028889	2783.22	-0.193674	0.078301	0.00308039	0.0580646	Yrdc	All_Genes
ENSMUSG00000022014	1170.01	-0.223568	0.0946335	0.00313008	0.0588331	Epsti1	All_Genes
ENSMUSG00000034333	605.825	0.417683	0.223252	0.00312897	0.0588331	Zbed4	All_Genes
ENSMUSG00000021038	1669.04	-0.254311	0.1141	0.00315262	0.0591722	Vipas39	All_Genes
ENSMUSG00000066637	1339.11	-0.27167	0.122536	0.00315821	0.0591929	Ttc32	All_Genes
ENSMUSG00000037601	3780.17	-0.270299	0.128662	0.00316421	0.0592211	Nme1	All_Genes
ENSMUSG00000036606	2210.69	0.344533	0.171938	0.00316871	0.0592212	Plxnb2	All_Genes
ENSMUSG00000067377	3809.86	-0.290247	0.135616	0.00320974	0.059903	Tspan6	All_Genes
ENSMUSG00000041921	988.787	-0.253552	0.112654	0.00322243	0.05997	Metap1d	All_Genes
ENSMUSG00000070436	105.603	0.727817	0.507336	0.00321994	0.05997	Serpinh1	All_Genes
ENSMUSG00000028483	1369.52	-0.212888	0.0887498	0.00323106	0.0600458	Snapc3	All_Genes
ENSMUSG00000005267	289.992	0.356459	0.181871	0.00326742	0.0603519	Zfp287	All_Genes
ENSMUSG00000026032	3619.54	-0.200537	0.08111	0.00325514	0.0603519	Ndufb3	All_Genes
ENSMUSG00000028189	300.804	-0.441609	0.24577	0.00327043	0.0603519	Ctbs	All_Genes
ENSMUSG00000040586	791.25	-0.252846	0.112076	0.00326865	0.0603519	Ofd1	All_Genes
ENSMUSG00000004568	984.285	0.312212	0.150932	0.00328631	0.06056	Arhgef18	All_Genes
ENSMUSG00000036863	197.926	0.566901	0.351989	0.00331446	0.0609935	Syde2	All_Genes
ENSMUSG00000039410	161.626	0.546616	0.333931	0.00332299	0.0610651	Prdm16	All_Genes
ENSMUSG00000021275	247.377	0.706883	0.504168	0.00332844	0.0610802	Tecpr2	All_Genes
ENSMUSG00000028099	3783.46	-0.220965	0.0941351	0.00333919	0.0611072	Polr3c	All_Genes
ENSMUSG00000071660	3324.78	0.186356	0.0751067	0.00333804	0.0611072	Ttc9c	All_Genes
ENSMUSG00000021451	5001.01	0.273895	0.125846	0.00334582	0.0611436	Sema4d	All_Genes
ENSMUSG00000041765	4646.34	-0.163646	0.0637109	0.0033561	0.0611618	Ubac2	All_Genes
ENSMUSG00000049866	185.608	0.458457	0.262531	0.00335375	0.0611618	Arl4c	All_Genes
ENSMUSG00000028252	2287.41	-0.32696	0.164451	0.00336116	0.0611694	Ccnc	All_Genes
ENSMUSG00000095079	328.274	-0.00431028	0.121179	0.00338488	0.0615161	Igha	All_Genes
ENSMUSG00000028059	5124.25	0.223023	0.0950932	0.00339494	0.061614	Arhgef2	All_Genes
ENSMUSG00000048796	447.781	0.41039	0.226038	0.00344121	0.0622155	Cyb561d1	All_Genes
ENSMUSG00000069910	2194.65	-0.173276	0.0687115	0.00344225	0.0622155	Spdl1	All_Genes
ENSMUSG00000068220	7124.84	0.263118	0.120444	0.00348559	0.0628933	Lgals1	All_Genes
ENSMUSG00000084992	27.6217	-0.107429	0.200369	0.0034893	0.0628933	Gm13842	All_Genes
ENSMUSG00000023330	1409.36	-0.231089	0.100605	0.00351311	0.0630411	Dtwd1	All_Genes
ENSMUSG00000028013	2715.82	-0.219097	0.0935944	0.00351649	0.0630411	Ppa2	All_Genes
ENSMUSG00000028078	522.081	0.358836	0.187924	0.00351664	0.0630411	Dclk2	All_Genes
ENSMUSG00000030724	37686.9	0.157487	0.0611054	0.003509	0.0630411	Cd19	All_Genes
ENSMUSG00000028017	220.776	0.600105	0.399605	0.00354611	0.063483	Egf	All_Genes
ENSMUSG00000039246	97.5865	-0.770338	0.568601	0.00356174	0.06359	Lyplal1	All_Genes
ENSMUSG00000071662	4061.42	-0.210309	0.0879654	0.00357669	0.0637705	Polr2g	All_Genes
ENSMUSG00000028788	14604.5	0.150825	0.0579966	0.00359857	0.064074	Ptp4a2	All_Genes
ENSMUSG00000022091	97.2138	0.540997	0.343368	0.00361842	0.0642538	Sorbs3	All_Genes
ENSMUSG00000005362	1755.05	-0.221538	0.0964569	0.00366251	0.0646894	Crbn	All_Genes
ENSMUSG00000034940	805.101	0.336905	0.172933	0.0036496	0.0646894	Synrg	All_Genes
ENSMUSG00000035378	936.484	-0.279865	0.133241	0.00365609	0.0646894	Shq1	All_Genes
ENSMUSG00000083179	175.061	-0.33391	0.170571	0.00366259	0.0646894	Gm12693	All_Genes
ENSMUSG00000035722	903.664	0.351044	0.183892	0.0036704	0.0647405	Abca7	All_Genes
ENSMUSG00000025534	4471.37	-0.213039	0.0907646	0.00369504	0.0649144	Gusb	All_Genes
ENSMUSG00000034210	2503.25	0.22129	0.0954558	0.00369431	0.0649144	Efcab14	All_Genes
ENSMUSG00000029482	2830.3	0.205958	0.0873357	0.00374076	0.0656301	Aacs	All_Genes
ENSMUSG00000047767	2099.11	0.284523	0.136285	0.00375436	0.0657813	Atg16l2	All_Genes
ENSMUSG00000056671	282.755	-0.312896	0.157699	0.00377253	0.0660071	Prelid2	All_Genes
ENSMUSG00000091402	94.7637	0.699411	0.504083	0.00377727	0.0660071	Rd3l	All_Genes
ENSMUSG00000039481	39.7296	0.809022	0.637874	0.00380621	0.0664246	Nrtn	All_Genes
ENSMUSG00000013539	1266.57	-0.231069	0.104259	0.00385189	0.0671329	Tango2	All_Genes
ENSMUSG00000054612	255.574	-0.31899	0.164846	0.00386206	0.0672212	Mgmt	All_Genes
ENSMUSG00000063179	558.565	-0.324229	0.166622	0.00389064	0.0676295	Pstk	All_Genes
ENSMUSG00000025785	6133.27	-0.238025	0.107494	0.00391767	0.0677826	Exosc7	All_Genes
ENSMUSG00000035171	3774.83	-0.295935	0.144398	0.00392003	0.0677826	1110059E24Rik	All_Genes
ENSMUSG00000027131	1977.73	-0.2327	0.103646	0.00392538	0.0677861	Emc4	All_Genes
ENSMUSG00000002885	3285.14	0.328879	0.169531	0.0039492	0.0681019	Adgre5	All_Genes
ENSMUSG00000021866	580.38	0.282233	0.136772	0.00398176	0.0684905	Anxa11	All_Genes
ENSMUSG00000032567	587.785	0.289291	0.140827	0.00400446	0.0687911	Aste1	All_Genes
ENSMUSG00000023079	977.612	0.219886	0.096602	0.00402379	0.0690331	Gtf2ird1	All_Genes
ENSMUSG00000025436	939.897	-0.289087	0.143174	0.00403134	0.0690727	Atp23	All_Genes
ENSMUSG00000039943	469.689	-0.394459	0.22587	0.00404714	0.0690739	Plcb4	All_Genes
ENSMUSG00000079215	1878.12	0.274334	0.131501	0.0040432	0.0690739	Zfp664	All_Genes
ENSMUSG00000112805	144.24	-0.572029	0.398714	0.00403862	0.0690739	Gm34574	All_Genes
ENSMUSG00000030956	13661.8	0.315419	0.161947	0.00405756	0.0691622	Fam53b	All_Genes
ENSMUSG00000022521	1830.24	0.290528	0.143249	0.00409598	0.0697269	Crebbp	All_Genes
ENSMUSG00000058013	5590.01	-0.26495	0.125535	0.00410909	0.0698599	Sept11	All_Genes
ENSMUSG00000065990	4107.66	-0.225922	0.0996949	0.00413748	0.0701614	Aurkaip1	All_Genes
ENSMUSG00000029064	14705	-0.179747	0.0739585	0.00415454	0.0703602	Gnb1	All_Genes
ENSMUSG00000028082	299.455	0.520826	0.349998	0.00416317	0.0704158	Sh3d19	All_Genes
ENSMUSG00000019082	1727.57	0.17859	0.0733181	0.00418761	0.0707385	Slc25a22	All_Genes
ENSMUSG00000046897	2260.58	0.294081	0.146908	0.00419842	0.0708302	Zfp740	All_Genes
ENSMUSG00000005804	2093.91	-0.191695	0.0811776	0.00427213	0.0719816	Bloc1s6	All_Genes
ENSMUSG00000024556	11473.8	-0.238676	0.11068	0.00429508	0.0722758	Me2	All_Genes
ENSMUSG00000031337	602.815	-0.311225	0.159686	0.00432951	0.0727623	Mtm1	All_Genes
ENSMUSG00000025134	18404.8	-0.19376	0.0833244	0.00440132	0.0736871	Alyref	All_Genes
ENSMUSG00000030056	1300.16	-0.198432	0.0853461	0.00440117	0.0736871	Isy1	All_Genes
ENSMUSG00000056214	1782.97	0.225438	0.101872	0.00439189	0.0736871	Pard6g	All_Genes
ENSMUSG00000020654	409.86	0.333883	0.181994	0.00443331	0.073956	Adcy3	All_Genes
ENSMUSG00000046949	830.686	-0.268341	0.129145	0.00443422	0.073956	Nqo2	All_Genes
ENSMUSG00000010453	2687.42	0.296541	0.150863	0.00447969	0.074338	Kansl3	All_Genes
ENSMUSG00000030323	1380.17	0.294043	0.14917	0.00447784	0.074338	Ift122	All_Genes
ENSMUSG00000051457	2639.06	0.207219	0.0916081	0.00447902	0.074338	Spn	All_Genes
ENSMUSG00000027394	298.616	0.3438	0.189348	0.00449757	0.0745408	Ttl	All_Genes
ENSMUSG00000018412	2452.62	0.304642	0.160018	0.00454206	0.0750893	Kansl1	All_Genes
ENSMUSG00000022967	4222.7	0.200012	0.0866984	0.0045595	0.0752832	Ifnar1	All_Genes
ENSMUSG00000028691	53089.4	-0.201824	0.0878712	0.00456767	0.0753237	Prdx1	All_Genes
ENSMUSG00000040565	2808.65	-0.415892	0.259085	0.00458633	0.0755368	Btaf1	All_Genes
ENSMUSG00000031520	55.2042	-0.591733	0.455553	0.00461132	0.0758535	Vegfc	All_Genes
ENSMUSG00000030917	179.915	-0.432543	0.275676	0.0046243	0.0759723	Tmem159	All_Genes
ENSMUSG00000032253	5596.54	0.223503	0.101418	0.0046404	0.0761418	Phip	All_Genes
ENSMUSG00000003161	7758.25	-0.184793	0.0791097	0.00466427	0.0764384	Sri	All_Genes
ENSMUSG00000037991	1890.57	0.259483	0.125713	0.0046729	0.0764846	Rmi2	All_Genes
ENSMUSG00000038990	2481.09	0.210949	0.0942598	0.00467958	0.076499	Cables2	All_Genes
ENSMUSG00000039230	3467.88	-0.20952	0.0927024	0.00468564	0.0765031	Tbcd	All_Genes
ENSMUSG00000062248	7960.94	-0.251802	0.120578	0.00472324	0.0770215	Cks2	All_Genes
ENSMUSG00000029447	32670.5	-0.199657	0.0876055	0.00473413	0.0770594	Cct6a	All_Genes
ENSMUSG00000058135	1246.79	-0.321344	0.177697	0.00473726	0.0770594	Gstm1	All_Genes
ENSMUSG00000005510	4349.38	-0.20005	0.0875038	0.00476172	0.0773483	Ndufs3	All_Genes
ENSMUSG00000019539	224.544	-0.321011	0.174379	0.00476676	0.0773483	Rcn3	All_Genes
ENSMUSG00000051615	138.918	0.596884	0.482819	0.00479194	0.0776612	Rap2a	All_Genes
ENSMUSG00000035370	55.7363	0.606447	0.491835	0.00480863	0.077836	Gm49322	All_Genes
ENSMUSG00000025880	381.512	0.328732	0.180893	0.00483031	0.078091	Smad7	All_Genes
ENSMUSG00000031068	13443.6	-0.185024	0.0856146	0.00486123	0.0783984	Glrx3	All_Genes
ENSMUSG00000085175	125.431	-0.423432	0.271341	0.00485734	0.0783984	Gm11423	All_Genes
ENSMUSG00000026578	876.515	-0.289311	0.149325	0.00487948	0.0784147	Ccdc181	All_Genes
ENSMUSG00000029213	4063.11	-0.23916	0.113562	0.00489199	0.0784147	Commd8	All_Genes
ENSMUSG00000036752	31767.5	-0.155462	0.0639393	0.00489099	0.0784147	Tubb4b	All_Genes
ENSMUSG00000049744	5778.83	-0.218497	0.0994001	0.00487633	0.0784147	Arhgap15	All_Genes
ENSMUSG00000079317	1048.73	-0.326867	0.179626	0.00488296	0.0784147	Trappc2	All_Genes
ENSMUSG00000023243	719.799	0.299117	0.155779	0.00492641	0.0788705	Kcnk5	All_Genes
ENSMUSG00000015937	40769.6	-0.185129	0.080317	0.00493251	0.0788722	H2afy	All_Genes
ENSMUSG00000036632	2116.78	-0.190967	0.0825801	0.00494908	0.0790412	Alg5	All_Genes
ENSMUSG00000016921	21849.2	-0.175006	0.0739535	0.00502804	0.0800786	Srsf6	All_Genes
ENSMUSG00000083596	975.655	-0.205786	0.0923337	0.00503226	0.0800786	Rpl21-ps15	All_Genes
ENSMUSG00000026819	988.682	0.233624	0.107771	0.00507698	0.0805956	Slc25a25	All_Genes
ENSMUSG00000051232	1649.15	-0.243523	0.119792	0.00511497	0.0811009	Tmem199	All_Genes
[truncated: 10,942 more rows]

## Sheet: Fig4b_P1P2dKOvsCtrl
Row.names	baseMean	log2FoldChange	lfcSE	pvalue	padj	GeneName	cc_Phase
ENSMUSG00000025747	12754.4	-1.14898	0.0766316	7.35973e-52	5.13801e-49	Tyms	S
ENSMUSG00000052369	1828.48	-0.987968	0.103256	9.68684e-23	2.53598e-20	Tmem106c	S
ENSMUSG00000062510	3192.23	-0.649815	0.0677017	1.11782e-22	2.88141e-20	Nsl1	S
ENSMUSG00000022177	5985.79	-0.779236	0.0816403	1.6206e-22	4.0527e-20	Haus4	S
ENSMUSG00000029863	6514.46	-0.964598	0.108117	2.83996e-20	5.22896e-18	Casp2	S
ENSMUSG00000001525	67884.2	0.660523	0.0784576	5.41839e-18	8.32891e-16	Tubb5	S
ENSMUSG00000041238	4059.72	-0.50935	0.0625303	6.9512e-17	9.54651e-15	Rbbp8	S
ENSMUSG00000041298	622.584	1.06941	0.156082	5.44659e-13	4.18613e-11	Katnal1	S
ENSMUSG00000006763	1804.82	-0.752842	0.120597	5.28806e-11	2.93382e-09	Saal1	S
ENSMUSG00000001436	5119.1	0.609742	0.102098	3.99761e-10	1.8786e-08	Slc19a1	S
ENSMUSG00000027424	1551.9	0.365635	0.0670396	1.795e-08	6.12529e-07	Mgme1	S
ENSMUSG00000022471	19919.1	-0.331736	0.0606829	2.28018e-08	7.50578e-07	Xrcc6	S
ENSMUSG00000021485	3568.88	-0.512078	0.0984144	2.46195e-08	8.03917e-07	Mxd3	S
ENSMUSG00000045273	2663.46	-0.627697	0.120116	2.50269e-08	8.13481e-07	Cenph	S
ENSMUSG00000045751	3831.85	-0.51724	0.105785	1.8464e-07	4.87957e-06	Mms22l	S
ENSMUSG00000026187	1684.6	-0.498069	0.104068	3.68703e-07	8.93426e-06	Xrcc5	S
ENSMUSG00000032782	1407.22	-0.531691	0.114579	6.02013e-07	1.36491e-05	Cntrob	S
ENSMUSG00000038482	28053	0.36168	0.075395	6.4114e-07	1.44775e-05	Tfdp1	S
ENSMUSG00000022369	1874.88	-0.523578	0.114385	8.77941e-07	1.92538e-05	Mtbp	S
ENSMUSG00000025364	13094.1	0.477388	0.103938	1.39253e-06	2.92013e-05	Pa2g4	S
ENSMUSG00000008690	16075.4	-0.368339	0.0799515	1.44631e-06	3.01405e-05	Ncaph2	S
ENSMUSG00000018666	6115.74	-0.370655	0.0804568	1.52261e-06	3.15135e-05	Cbx1	S
ENSMUSG00000017561	13404.5	-0.280831	0.0619538	2.65491e-06	5.10712e-05	Crlf3	S
ENSMUSG00000026196	636.976	0.674237	0.159028	2.71009e-06	5.19538e-05	Bard1	S
ENSMUSG00000027353	2621.47	0.408371	0.0941722	4.15882e-06	7.50873e-05	Mcm8	S
ENSMUSG00000026669	5729.67	0.277442	0.0627065	4.31607e-06	7.78426e-05	Mcm10	S
ENSMUSG00000039509	7015.77	0.244355	0.0550052	5.41563e-06	9.46181e-05	Nup133	S
ENSMUSG00000031629	489.962	-0.593364	0.145728	6.82417e-06	0.000115494	Cenpu	S
ENSMUSG00000027641	8560.35	-0.557842	0.142228	1.30418e-05	0.000201768	Rbl1	S
ENSMUSG00000055660	1687.92	0.42955	0.106706	1.53982e-05	0.000233481	Mettl4	S
ENSMUSG00000043091	10718.3	-0.286819	0.0691767	1.7009e-05	0.000252872	Tuba1c	S
ENSMUSG00000029366	30225.9	-0.443549	0.113902	2.55599e-05	0.000360485	Dck	S
ENSMUSG00000043872	1253.78	0.456421	0.11813	2.8671e-05	0.000398327	Zmym1	S
ENSMUSG00000039994	5046.56	0.293386	0.0735229	3.20104e-05	0.000436399	Timeless	S
ENSMUSG00000038544	6729.5	0.200944	0.0507656	5.00411e-05	0.000637595	Inip	S
ENSMUSG00000047242	652.978	-0.531644	0.148504	5.914e-05	0.000736175	Taf9b	S
ENSMUSG00000007050	4466.54	0.273503	0.0719285	7.42162e-05	0.000900429	Lsm2	S
ENSMUSG00000020185	1762.85	-0.448865	0.125332	7.90636e-05	0.00095166	E2f7	S
ENSMUSG00000026496	38479.2	0.252428	0.069626	0.000131048	0.00143698	Parp1	S
ENSMUSG00000037474	12394.6	0.406405	0.11768	0.000161266	0.00170367	Dtl	S
ENSMUSG00000022234	43830.5	0.320053	0.0917265	0.000165343	0.00173735	Cct5	S
ENSMUSG00000037443	6829.06	-0.302508	0.0872221	0.000236887	0.00234577	Cep85	S
ENSMUSG00000044678	98.2316	1.1091	0.402455	0.000316068	0.00298856	Ly6k	S
ENSMUSG00000039748	5025.66	0.291759	0.0858446	0.000324342	0.00304104	Exo1	S
ENSMUSG00000020527	285.135	-0.729326	0.252921	0.000333373	0.00312222	Myo19	S
ENSMUSG00000050410	6824.43	-0.364227	0.114032	0.000444513	0.00398279	Tcf19	S
ENSMUSG00000040312	1252.75	-0.449457	0.145486	0.000461982	0.00411292	Cchcr1	S
ENSMUSG00000025646	1327.64	0.331342	0.102952	0.000502198	0.0044008	Atrip	S
ENSMUSG00000029676	3737.48	-0.253822	0.0774897	0.000584353	0.00500043	Pot1a	S
ENSMUSG00000005698	14653.1	-0.147553	0.0441932	0.000742045	0.00607078	Ctcf	S
ENSMUSG00000052798	11292.1	0.21128	0.0661333	0.000755449	0.00615939	Nup107	S
ENSMUSG00000030322	1952.9	-0.32754	0.106654	0.000781378	0.00630636	Mbd4	S
ENSMUSG00000042462	3938.37	0.354761	0.116551	0.000842669	0.00670414	Dctpp1	S
ENSMUSG00000019773	12386.1	-0.27651	0.0892626	0.000857845	0.00680531	Fbxo5	S
ENSMUSG00000043015	1122.69	-0.385599	0.130967	0.000937882	0.00729875	Nemp2	S
ENSMUSG00000042208	2561.35	0.392108	0.135054	0.000981973	0.00757851	0610010F05Rik	S
ENSMUSG00000078762	377.636	-0.413702	0.143376	0.000998457	0.00768449	Haus5	S
ENSMUSG00000027811	4050.17	-0.323276	0.107045	0.00102753	0.00787569	4930579G24Rik	S
ENSMUSG00000021048	11713.4	0.345988	0.116424	0.00105773	0.00804097	Mthfd1	S
ENSMUSG00000029790	1455.11	-0.257825	0.0832748	0.00106124	0.00806401	Cep41	S
ENSMUSG00000028282	3961.31	0.369336	0.127569	0.00119231	0.00887871	Casp8ap2	S
ENSMUSG00000002718	22224.7	0.296609	0.0988641	0.00127285	0.00939498	Cse1l	S
ENSMUSG00000002319	920.653	0.378103	0.131797	0.00131835	0.00967962	Ipo4	S
ENSMUSG00000007739	25643	0.259739	0.0859249	0.0014824	0.010652	Cct4	S
ENSMUSG00000024833	9943	0.249985	0.0835642	0.00164732	0.0115292	Pola2	S
ENSMUSG00000021572	2468.77	-0.252109	0.085488	0.00174015	0.0120609	Cep72	S
ENSMUSG00000024817	5553.34	-0.291287	0.105958	0.00260766	0.0167786	Uhrf2	S
ENSMUSG00000002835	6310.51	0.203463	0.0716513	0.00299149	0.0186329	Chaf1a	S
ENSMUSG00000039396	7209.23	-0.287511	0.105682	0.00307762	0.0190701	Neil3	S
ENSMUSG00000029191	8165.64	0.208763	0.0752673	0.00322949	0.0198861	Rfc1	S
ENSMUSG00000009575	6626.69	0.236094	0.0871241	0.00396674	0.0235282	Cbx5	S
ENSMUSG00000035024	8993.42	-0.286837	0.110502	0.00419129	0.0245628	Ncapd3	S
ENSMUSG00000055612	31669.4	0.210721	0.0773276	0.0041993	0.024584	Cdca7	S
ENSMUSG00000022422	2178.69	-0.305518	0.119608	0.00442742	0.0256772	Dscc1	S
ENSMUSG00000052926	4162.97	0.200867	0.0741435	0.00473119	0.0270735	Rnaseh2a	S
ENSMUSG00000028333	30629.5	0.215599	0.0810072	0.0047997	0.0274093	Anp32b	S
ENSMUSG00000037461	8184.26	0.277614	0.1058	0.00519864	0.0292686	Ints7	S
ENSMUSG00000026646	1055.07	0.299088	0.120351	0.00555876	0.0308912	Suv39h2	S
ENSMUSG00000031575	7782.51	-0.136705	0.0508927	0.00601401	0.0328652	Ash2l	S
ENSMUSG00000036181	384.868	-0.377763	0.167372	0.00651	0.0350048	Hist1h1c	S
ENSMUSG00000034024	15079.2	0.199896	0.0762847	0.00681779	0.0362641	Cct2	S
ENSMUSG00000030662	11936.6	0.30553	0.127775	0.0069287	0.0366563	Ipo5	S
ENSMUSG00000029430	74956	0.223041	0.0890045	0.00712837	0.0374642	Ran	S
ENSMUSG00000035726	5655.26	0.262447	0.107619	0.00741338	0.0386469	Supt16	S
ENSMUSG00000028693	10493.8	0.190992	0.0751225	0.00760363	0.0393449	Nasp	S
ENSMUSG00000034773	1515.5	0.231386	0.0939576	0.00842289	0.0424821	BC030867	S
ENSMUSG00000026245	10776.5	0.195522	0.0795004	0.00970087	0.0471946	Farsb	S
ENSMUSG00000026037	3384.23	0.20286	0.0863453	0.00979434	0.0475527	Orc2	S
ENSMUSG00000028884	15291.2	0.248334	0.10582	0.0101323	0.0488395	Rpa2	S
ENSMUSG00000026134	5927.25	-0.224909	0.0964017	0.0104164	0.0498931	Prim2	S
ENSMUSG00000006728	34569.9	0.219167	0.0925182	0.0107404	0.0511671	Cdk4	S
ENSMUSG00000019952	2601.02	-0.248124	0.108098	0.0108572	0.051597	Poc1b	S
ENSMUSG00000055884	849.898	0.337268	0.157808	0.0109296	0.051862	Fancm	S
ENSMUSG00000028453	2097.48	-0.200851	0.0837359	0.0113456	0.053503	Fancg	S
ENSMUSG00000005470	26836.6	-0.254394	0.113526	0.0114512	0.0538343	Asf1b	S
ENSMUSG00000074780	24.7299	-0.600399	0.452673	0.0125867	0.0579207	Anapc15-ps	S
ENSMUSG00000022142	4040.08	0.28992	0.132509	0.0127807	0.0586527	Nup155	S
ENSMUSG00000038010	1202.83	-0.311433	0.147976	0.0132645	0.0603406	Ccdc138	S
ENSMUSG00000006585	5693.22	0.258484	0.116621	0.0137251	0.062106	Cdt1	S
ENSMUSG00000026709	5557.54	0.186455	0.0802992	0.0143256	0.0641779	Dars2	S
ENSMUSG00000099517	54.0885	-0.555161	0.433213	0.0146738	0.0653708	Hist1h3g	S
ENSMUSG00000078773	2134.52	-0.160787	0.0689861	0.0153048	0.0674645	Rad54b	S
ENSMUSG00000027722	2718.2	0.214664	0.0963555	0.0154559	0.0680049	Spata5	S
ENSMUSG00000034303	658.875	0.270008	0.129023	0.0172406	0.0736588	Ccdc15	S
ENSMUSG00000078521	1539.51	0.302483	0.150196	0.0173026	0.0738405	Aunip	S
ENSMUSG00000017499	9541.95	0.179527	0.081429	0.0191354	0.0795964	Cdc6	S
ENSMUSG00000020358	17446.9	0.155585	0.069339	0.020149	0.0826813	Hnrnpab	S
ENSMUSG00000007570	905.77	0.230455	0.109051	0.0201936	0.0828058	Fance	S
ENSMUSG00000020652	2876.6	0.168685	0.077114	0.0215553	0.0871944	Cenpo	S
ENSMUSG00000004880	45083.2	-0.188328	0.0871459	0.0215923	0.087302	Lbr	S
ENSMUSG00000001416	36013	0.16752	0.0784536	0.0230971	0.0920798	Cct3	S
ENSMUSG00000028896	11393.4	0.142319	0.0651221	0.0232172	0.0923787	Rcc1	S
ENSMUSG00000035842	2364.1	-0.193326	0.0907376	0.0235442	0.0933024	Ddx11	S
ENSMUSG00000021377	19767	-0.227764	0.113034	0.0255779	0.0991114	Dek	S
ENSMUSG00000040034	2795.94	0.224962	0.111475	0.0256716	0.0993368	Nup43	S
ENSMUSG00000022960	2441.35	-0.231818	0.116879	0.0268258	0.102641	Donson	S
ENSMUSG00000022881	9582.9	0.201223	0.0987917	0.027516	0.104689	Rfc4	S
ENSMUSG00000027845	921.826	-0.233659	0.119536	0.0282791	0.106884	Dclre1b	S
ENSMUSG00000027203	12305.8	0.148688	0.0709088	0.0284866	0.107474	Dut	S
ENSMUSG00000002870	35087.1	0.138978	0.0662689	0.0285518	0.107647	Mcm2	S
ENSMUSG00000048170	11443.6	0.127018	0.0602918	0.0292555	0.109463	Mcmbp	S
ENSMUSG00000069306	41.9229	-0.41952	0.326761	0.0294289	0.10994	Hist1h4m	S
ENSMUSG00000022945	9471.44	0.213594	0.11001	0.0311107	0.114813	Chaf1b	S
ENSMUSG00000003868	11248.1	0.217402	0.114555	0.0349515	0.125776	Ruvbl2	S
ENSMUSG00000044783	14068.6	-0.202292	0.105345	0.0357296	0.127999	Hjurp	S
ENSMUSG00000031922	5994.86	-0.211024	0.113522	0.0374334	0.13232	Cep57	S
ENSMUSG00000017861	8476.72	0.147163	0.0733246	0.0397623	0.138462	Mybl2	S
ENSMUSG00000033762	934.271	0.223608	0.122763	0.039818	0.138557	Recql4	S
ENSMUSG00000024151	11742.6	0.13808	0.0723554	0.0440358	0.148844	Msh2	S
ENSMUSG00000033054	2624.59	0.198497	0.109961	0.0442954	0.149567	Npat	S
ENSMUSG00000034206	619.934	0.313807	0.215605	0.0456143	0.152627	Polq	S
ENSMUSG00000021177	5224.73	-0.13868	0.073428	0.0467279	0.155435	Tdp1	S
ENSMUSG00000031065	3570.29	0.181693	0.099615	0.0494685	0.161789	Cdk16	S
ENSMUSG00000026355	63934.1	0.129075	0.0684013	0.0502397	0.163528	Mcm6	S
ENSMUSG00000034329	4142.27	-0.185906	0.107416	0.0564844	0.177527	Brip1	S
ENSMUSG00000048799	2146	-0.23819	0.149608	0.0570423	0.178878	Cep120	S
ENSMUSG00000038126	1122.53	0.229824	0.142456	0.0580171	0.181188	Mphosph9	S
ENSMUSG00000025436	939.897	0.20934	0.125148	0.0587447	0.182915	Atp23	S
ENSMUSG00000020697	2032.96	0.22202	0.138461	0.0591668	0.183882	Lig3	S
ENSMUSG00000028587	1332.8	0.184088	0.105141	0.0594976	0.184266	Orc1	S
ENSMUSG00000025742	9600.59	0.183537	0.109731	0.0672733	0.201712	Prps2	S
ENSMUSG00000021929	9260.18	0.235569	0.157799	0.0734263	0.213772	Kpna3	S
ENSMUSG00000026036	1848.5	0.217996	0.147951	0.0784466	0.223723	Nif3l1	S
ENSMUSG00000019988	3688.92	-0.165284	0.102169	0.0786671	0.224085	Nedd1	S
ENSMUSG00000033970	7661.03	-0.174471	0.111746	0.0810975	0.228368	Rfc3	S
ENSMUSG00000032586	3672.69	0.10685	0.0631306	0.0816691	0.22963	Traip	S
ENSMUSG00000047246	261.662	-0.253593	0.198821	0.0840889	0.234662	Hist1h2be	S
ENSMUSG00000024258	3972.22	0.153895	0.0958818	0.0848056	0.235885	Polr2d	S
ENSMUSG00000029730	41325.9	0.118883	0.0719795	0.0861382	0.238605	Mcm7	S
ENSMUSG00000042699	3014.68	0.210693	0.145185	0.0861854	0.238644	Dhx9	S
ENSMUSG00000042590	6532.9	0.186682	0.123875	0.0893463	0.244709	Ipo11	S
ENSMUSG00000056394	19989.1	-0.123757	0.0763181	0.0905612	0.247189	Lig1	S
ENSMUSG00000014074	2760.21	0.191099	0.132206	0.0908346	0.247751	Rnf168	S
ENSMUSG00000041406	3461.41	0.140386	0.0866002	0.0924867	0.250666	BC055324	S
ENSMUSG00000004018	1415.33	-0.151858	0.0986821	0.0957945	0.257163	Fancl	S
ENSMUSG00000051220	5852.59	0.126911	0.0805719	0.0958995	0.257274	Ercc6l	S
ENSMUSG00000062822	2263.1	-0.15017	0.0978808	0.0961809	0.257677	4833420G17Rik	S
ENSMUSG00000039231	7091.31	0.0963937	0.0596341	0.0995397	0.263774	Suv39h1	S
ENSMUSG00000028438	933.486	-0.197994	0.144037	0.102534	0.269442	Kif24	S
ENSMUSG00000032939	12603.2	0.116068	0.0753355	0.105095	0.274107	Nup93	S
ENSMUSG00000040520	901.235	-0.240469	0.207742	0.105735	0.275353	Manea	S
ENSMUSG00000005566	20570.6	0.148086	0.0949465	0.110637	0.284008	Trim28	S
ENSMUSG00000029247	35281.1	0.161542	0.110576	0.111019	0.28451	Paics	S
ENSMUSG00000032477	4120.05	0.119362	0.0791297	0.111314	0.284962	Cdc25a	S
ENSMUSG00000020739	13581.4	0.136938	0.0928971	0.113078	0.287805	Nup85	S
ENSMUSG00000075470	369.439	0.225712	0.195003	0.117222	0.29548	Alg10b	S
ENSMUSG00000000568	26049.3	0.117624	0.0775882	0.122752	0.304788	Hnrnpd	S
ENSMUSG00000031971	943.451	-0.160474	0.116693	0.123626	0.306368	Ccsap	S
ENSMUSG00000032113	4022.94	0.150774	0.107395	0.124513	0.307481	Chek1	S
ENSMUSG00000040195	1114.06	-0.2107	0.188568	0.131182	0.318453	Nemp1	S
ENSMUSG00000015749	34964.4	-0.101055	0.0723923	0.13511	0.324648	Anp32e	S
ENSMUSG00000035439	2572.51	-0.148751	0.10934	0.135438	0.325108	Haus8	S
ENSMUSG00000024974	13180.5	-0.0944492	0.0675535	0.136464	0.326425	Smc3	S
ENSMUSG00000054309	9463.36	0.101148	0.072315	0.144694	0.338913	Cpsf3	S
ENSMUSG00000016757	2742.83	0.128773	0.0983866	0.155501	0.35492	Ttll12	S
ENSMUSG00000005732	13617.6	0.125923	0.0961417	0.160254	0.36218	Ranbp1	S
ENSMUSG00000074909	1122.21	-0.131819	0.103055	0.162496	0.365873	Ranbp6	S
ENSMUSG00000017146	3134.68	0.158922	0.131817	0.163009	0.366656	Brca1	S
ENSMUSG00000027454	3025.81	0.111187	0.0838119	0.164664	0.369237	Gins1	S
ENSMUSG00000026662	9255.65	-0.0833227	0.0635804	0.170134	0.377413	Sephs1	S
ENSMUSG00000061286	3021.77	0.118216	0.0912078	0.170617	0.377946	Exosc5	S
ENSMUSG00000023953	1276.19	0.154892	0.130886	0.171518	0.379172	Polh	S
ENSMUSG00000043065	1307.83	-0.134811	0.107582	0.173024	0.381149	Spice1	S
ENSMUSG00000023942	9207.02	0.108459	0.0856413	0.179619	0.391	Slc29a1	S
ENSMUSG00000019214	4106.41	-0.104941	0.0843339	0.18317	0.396001	Chtf18	S
ENSMUSG00000030393	923.084	0.16361	0.147251	0.184271	0.397504	Zik1	S
ENSMUSG00000044934	3875.17	0.148895	0.127913	0.184586	0.397832	Zfp367	S
ENSMUSG00000026429	3075.24	-0.129276	0.106887	0.188107	0.40283	Ube2t	S
ENSMUSG00000019303	2008.74	0.115707	0.0945831	0.189117	0.404372	Psmc3ip	S
ENSMUSG00000022673	29813.5	0.0986633	0.0794122	0.191265	0.407145	Mcm4	S
ENSMUSG00000005370	10758.9	0.136501	0.110899	0.192608	0.409247	Msh6	S
ENSMUSG00000037608	10755.3	0.115306	0.094948	0.193804	0.410621	Bclaf1	S
ENSMUSG00000020974	2041.85	0.126507	0.105363	0.194318	0.411242	Pole2	S
ENSMUSG00000020392	10537	-0.0970058	0.0813434	0.202359	0.421635	Cdkn2aipnl	S
ENSMUSG00000029466	3859.82	-0.0976065	0.0810355	0.204661	0.424288	Anapc7	S
ENSMUSG00000037846	1016.49	0.120048	0.104006	0.209468	0.430262	Rtkn2	S
ENSMUSG00000034021	6051.85	-0.144583	0.133625	0.213736	0.435291	Pds5b	S
ENSMUSG00000001151	1622.71	-0.137308	0.126575	0.216209	0.438622	Pcnt	S
ENSMUSG00000000751	20724.2	0.0902999	0.0761536	0.21707	0.439918	Rpa1	S
ENSMUSG00000020899	1628.27	0.122714	0.110901	0.22025	0.444026	Pfas	S
ENSMUSG00000041147	1800.79	0.11479	0.102313	0.224405	0.449159	Brca2	S
ENSMUSG00000038759	8145.44	0.161097	0.169892	0.226878	0.452716	Nup205	S
ENSMUSG00000012483	4465.71	-0.122669	0.118382	0.227057	0.452885	Rpa3	S
ENSMUSG00000073542	2070.42	0.126508	0.117993	0.228396	0.454486	Cep76	S
ENSMUSG00000039048	3694.06	0.0773866	0.0655734	0.229449	0.4555	Foxred1	S
ENSMUSG00000019373	8292.06	0.105299	0.0958641	0.235679	0.463039	Cops3	S
ENSMUSG00000000028	8516.81	0.0851207	0.0755297	0.236791	0.464408	Cdc45	S
ENSMUSG00000027823	11363.7	0.0964829	0.0875037	0.23842	0.466728	Gmps	S
ENSMUSG00000033596	9199.51	-0.147932	0.152736	0.238874	0.467399	Rfwd3	S
ENSMUSG00000031016	6905.78	0.0877753	0.0782723	0.23973	0.468198	Wee1	S
ENSMUSG00000024590	27369.1	0.117225	0.126371	0.244021	0.473286	Lmnb1	S
ENSMUSG00000027323	10911.9	0.101273	0.0951394	0.257144	0.489585	Rad51	S
ENSMUSG00000020794	7905.54	0.119579	0.117911	0.257374	0.489923	Ube2g1	S
ENSMUSG00000027490	2996.47	-0.0828518	0.0770486	0.261706	0.494715	E2f1	S
ENSMUSG00000030528	3142.58	0.11619	0.117253	0.265836	0.499336	Blm	S
ENSMUSG00000029003	1852.5	0.089714	0.0860593	0.267002	0.50062	Mad2l2	S
ENSMUSG00000052533	3343.75	0.120812	0.123928	0.268603	0.502618	Nup188	S
ENSMUSG00000021537	6608.21	-0.102577	0.10023	0.27105	0.505617	Cetn3	S
ENSMUSG00000029687	17036.5	-0.0789133	0.0771076	0.282983	0.519208	Ezh2	S
ENSMUSG00000027018	14128.1	0.104925	0.106626	0.285089	0.521641	Hat1	S
ENSMUSG00000036875	4843.17	0.0752734	0.0750544	0.287585	0.524376	Dna2	S
ENSMUSG00000040044	7733.58	0.0859748	0.0832449	0.288375	0.525245	Orc3	S
ENSMUSG00000068394	1206.12	0.137864	0.163956	0.288562	0.525414	Cep152	S
ENSMUSG00000041491	2845.52	0.081143	0.0804828	0.290948	0.528323	Cep78	S
ENSMUSG00000025358	10200.9	-0.0764197	0.0805334	0.291077	0.528499	Cdk2	S
ENSMUSG00000041859	43191.6	0.0734358	0.0740655	0.291435	0.529036	Mcm3	S
ENSMUSG00000021671	1812.66	-0.0729067	0.0722484	0.291813	0.529406	Poc5	S
ENSMUSG00000025395	10294	-0.0955584	0.0993348	0.295789	0.534225	Prim1	S
ENSMUSG00000052565	538.536	-0.137252	0.166919	0.295839	0.534225	Hist1h1d	S
ENSMUSG00000034883	1761.8	0.121742	0.136156	0.299811	0.538176	Lrr1	S
ENSMUSG00000024800	4039.67	0.0838708	0.0854772	0.300948	0.539639	Rpp30	S
ENSMUSG00000028688	604.759	0.0932478	0.0988821	0.308691	0.548185	Toe1	S
ENSMUSG00000071078	45.0527	0.142386	0.219488	0.310072	0.549472	Nr2c2ap	S
ENSMUSG00000007080	4822.82	0.119591	0.134676	0.310611	0.549784	Pole	S
ENSMUSG00000058773	3443.47	0.121847	0.164102	0.346681	0.587801	Hist1h1b	S
ENSMUSG00000062727	43.5573	-0.129938	0.217991	0.34783	0.588703	Hist1h2bk	S
ENSMUSG00000041346	1772.68	-0.0935052	0.111208	0.348294	0.588996	Wrap53	S
ENSMUSG00000024691	12163.4	0.0735145	0.0820228	0.349212	0.590002	Fam111a	S
ENSMUSG00000032264	5092.1	-0.0694136	0.0780867	0.351037	0.591891	Zw10	S
ENSMUSG00000018809	1371.13	0.079208	0.0900227	0.351438	0.59233	Smyd4	S
ENSMUSG00000033405	419.959	0.116009	0.15489	0.355927	0.596754	Nudt15	S
ENSMUSG00000000759	3649.26	-0.0892115	0.104866	0.357827	0.598532	Tubgcp3	S
ENSMUSG00000027242	715.003	0.102338	0.128036	0.359714	0.60024	Wdr76	S
ENSMUSG00000040599	3942.2	-0.0754942	0.0899886	0.366554	0.607478	Mis12	S
ENSMUSG00000075031	50.2732	-0.123491	0.207678	0.369265	0.610341	Hist1h2bb	S
ENSMUSG00000022034	9955.6	-0.0873507	0.10792	0.373636	0.613739	Esco2	S
ENSMUSG00000060639	410.849	0.0912811	0.114579	0.374671	0.614608	Hist1h4i	S
ENSMUSG00000037103	1844.02	-0.0857235	0.106643	0.378411	0.618262	Dcaf15	S
ENSMUSG00000054099	638.19	-0.118537	0.183875	0.379363	0.619394	Slc25a40	S
ENSMUSG00000020471	10629.5	0.0837115	0.103632	0.381734	0.621443	Pold2	S
ENSMUSG00000047832	10091.1	-0.0644544	0.0890561	0.388648	0.627764	Cdca4	S
ENSMUSG00000026999	2996.63	0.0872025	0.113733	0.393819	0.632762	Nup35	S
ENSMUSG00000032555	8487.69	0.0882652	0.113014	0.394457	0.633483	Topbp1	S
ENSMUSG00000031669	2286.46	0.0857074	0.115404	0.407417	0.645145	Gins3	S
ENSMUSG00000029363	11264.3	-0.0580595	0.0820281	0.420116	0.657609	Rfc5	S
ENSMUSG00000015478	951.089	-0.0713046	0.0959237	0.421052	0.658336	Rnf5	S
ENSMUSG00000021597	2492.87	0.0880153	0.130485	0.423369	0.659742	Slf1	S
ENSMUSG00000032249	1863.66	-0.105388	0.161188	0.427876	0.663494	Anp32a	S
ENSMUSG00000018189	11319.4	-0.0697188	0.0970944	0.431896	0.667012	Uchl5	S
ENSMUSG00000035198	6364.56	-0.0631027	0.100583	0.443824	0.67664	Tubg1	S
ENSMUSG00000024742	59.1624	0.10136	0.218759	0.444381	0.677304	Fen1	S
ENSMUSG00000046591	1546.85	-0.085265	0.131369	0.452273	0.684661	Ticrr	S
ENSMUSG00000046111	971.515	-0.0871293	0.135655	0.454781	0.686906	Cep295	S
ENSMUSG00000059791	6020.88	-0.0600434	0.0802207	0.455168	0.687429	Nrm	S
ENSMUSG00000046179	3428.87	-0.0661137	0.0877702	0.45944	0.68999	E2f8	S
ENSMUSG00000027285	2850.17	0.0678511	0.0990046	0.462627	0.693186	Haus2	S
ENSMUSG00000023104	14430.2	-0.044405	0.0835843	0.472067	0.70032	Rfc2	S
ENSMUSG00000031821	3399.1	0.0703406	0.109085	0.478647	0.704872	Gins2	S
ENSMUSG00000031577	1189.29	0.0562664	0.0826461	0.482828	0.708039	Tti2	S
ENSMUSG00000025862	11059.7	-0.08509	0.15184	0.48967	0.712663	Stag2	S
ENSMUSG00000006678	6602.59	-0.0834187	0.138731	0.491893	0.714617	Pola1	S
ENSMUSG00000028702	5517.61	-0.0603373	0.0937641	0.49326	0.715511	Rad54l	S
ENSMUSG00000047757	1512.36	0.0785398	0.135067	0.498425	0.719489	Fancb	S
ENSMUSG00000032498	3551.8	-0.057492	0.089549	0.499608	0.72027	Mlh1	S
ENSMUSG00000035455	15151.7	0.0505319	0.079685	0.506216	0.725609	Fignl1	S
ENSMUSG00000020649	75909.6	-0.056323	0.100244	0.507831	0.727115	Rrm2	S
ENSMUSG00000068114	1756.94	0.0609261	0.0992813	0.509107	0.728009	Ccdc134	S
ENSMUSG00000062075	6946.6	0.047551	0.0773673	0.518166	0.734887	Lmnb2	S
ENSMUSG00000022863	798.907	-0.0635898	0.111019	0.525361	0.740335	Btg3	S
ENSMUSG00000025066	8848.53	-0.0530524	0.0924562	0.533992	0.747392	Sfr1	S
ENSMUSG00000021707	5206.86	0.0528105	0.0964642	0.543883	0.75418	Dhfr	S
ENSMUSG00000028018	361.549	0.0724432	0.154349	0.564584	0.769074	Gstcd	S
ENSMUSG00000028560	16030.1	0.040515	0.0821067	0.573771	0.775051	Usp1	S
ENSMUSG00000004099	28911.2	0.0510116	0.100155	0.574085	0.775397	Dnmt1	S
ENSMUSG00000028484	11898.4	0.0485026	0.0960377	0.578984	0.778569	Psip1	S
ENSMUSG00000028212	8410.6	0.064098	0.13857	0.582384	0.780435	Ccne2	S
ENSMUSG00000039055	1687.99	-0.0459413	0.0895637	0.584106	0.78131	Eme1	S
ENSMUSG00000033904	1969.17	0.0645407	0.139496	0.587093	0.783305	Ccp110	S
ENSMUSG00000042079	43323.5	-0.0426044	0.0936873	0.59291	0.786581	Hnrnpf	S
ENSMUSG00000028033	318.36	0.0690717	0.167096	0.594395	0.787591	Kcnq5	S
ENSMUSG00000051329	6719.47	-0.063329	0.141384	0.598228	0.790295	Nup160	S
ENSMUSG00000026374	8441.09	-0.0315035	0.062698	0.600597	0.792003	Tsn	S
ENSMUSG00000042489	1725.89	-0.0475003	0.110325	0.608076	0.796646	Clspn	S
ENSMUSG00000036202	6258.92	0.0590323	0.12933	0.609804	0.79729	Rif1	S
ENSMUSG00000002068	4364.73	0.0413914	0.0858191	0.61147	0.798456	Ccne1	S
ENSMUSG00000024054	5474.21	0.0652282	0.151083	0.617408	0.802286	Smchd1	S
ENSMUSG00000030346	5994.86	-0.0447271	0.0980322	0.621424	0.80471	Rad51ap1	S
ENSMUSG00000030726	8274.89	0.0290799	0.0594352	0.623741	0.806366	Pold3	S
ENSMUSG00000025872	6170.49	0.0401002	0.0863329	0.624743	0.80706	Thoc3	S
ENSMUSG00000031691	1097.07	-0.0566413	0.136476	0.633331	0.812773	Tnpo2	S
ENSMUSG00000023066	851.749	-0.0602332	0.171554	0.64264	0.818754	Rttn	S
ENSMUSG00000015165	14531.6	0.0335939	0.0798902	0.65366	0.826634	Hnrnpl	S
ENSMUSG00000004642	34758.9	-0.0469642	0.11837	0.654569	0.827346	Slbp	S
ENSMUSG00000016619	5353.72	0.0303573	0.0710428	0.657868	0.829126	Nup50	S
ENSMUSG00000027650	2870.49	0.0382819	0.100316	0.667927	0.835033	Tti1	S
ENSMUSG00000031697	6073.87	-0.0336348	0.0849577	0.672665	0.837956	Orc6	S
ENSMUSG00000021461	1138.06	-0.0355026	0.0854974	0.674061	0.83851	Fancc	S
ENSMUSG00000057406	8948.79	0.0411229	0.105703	0.676899	0.840729	Nsd2	S
ENSMUSG00000024791	7725.2	0.0317797	0.0788812	0.677162	0.840839	Cdca5	S
ENSMUSG00000069274	14.0431	-0.0426993	0.239181	0.678991	0.841452	Hist1h4f	S
ENSMUSG00000038644	26203.5	0.0310304	0.0836101	0.682926	0.843915	Pold1	S
ENSMUSG00000041712	5389.04	0.0332741	0.0854129	0.686196	0.845711	Ubr7	S
ENSMUSG00000029283	4111.48	-0.0354574	0.105507	0.690713	0.848649	Cdc7	S
ENSMUSG00000030978	58912.3	0.030838	0.0854929	0.712681	0.860481	Rrm1	S
ENSMUSG00000038047	3059.13	0.0337257	0.10125	0.717061	0.862666	Haus6	S
ENSMUSG00000031928	3224.12	0.0229841	0.0670372	0.718001	0.863116	Mre11a	S
ENSMUSG00000021714	4633.82	-0.0443491	0.146323	0.71873	0.863408	Cenpk	S
ENSMUSG00000023909	157.401	0.0445959	0.180436	0.736057	0.873339	Paqr4	S
ENSMUSG00000032397	18844.1	-0.0334987	0.112773	0.740964	0.876017	Tipin	S
ENSMUSG00000020171	2824.31	0.0272474	0.0847831	0.742096	0.87664	Yeats4	S
ENSMUSG00000005410	40025.7	-0.0235544	0.0755823	0.743807	0.87764	Mcm5	S
ENSMUSG00000025574	7970.97	-0.0250946	0.0928255	0.745852	0.878922	Tk1	S
ENSMUSG00000061607	522.65	0.0421817	0.171052	0.746081	0.879	Mdc1	S
ENSMUSG00000030254	5529.57	-0.0216883	0.0774955	0.765943	0.889662	Rad18	S
ENSMUSG00000026960	3591.68	-0.0354639	0.151984	0.76934	0.891546	Arl6ip6	S
ENSMUSG00000069308	33.7906	0.035563	0.22042	0.771055	0.892359	Hist1h2bp	S
ENSMUSG00000040331	18201.3	-0.0275774	0.0948474	0.772391	0.89298	Nsmce4a	S
ENSMUSG00000017548	8085.81	0.028554	0.104037	0.781586	0.897271	Suz12	S
ENSMUSG00000021175	5817.5	-0.0198999	0.0824829	0.798262	0.905421	Cdca7l	S
ENSMUSG00000033364	2482.93	0.0231666	0.100583	0.807793	0.910663	Usp37	S
ENSMUSG00000001228	40932.2	0.0181428	0.0835964	0.81992	0.917604	Uhrf1	S
ENSMUSG00000049539	371.995	0.0289177	0.159711	0.82263	0.918631	Hist1h1a	S
ENSMUSG00000027342	43767.2	-0.0188524	0.0985355	0.834779	0.925257	Pcna	S
ENSMUSG00000031527	11645	0.0187445	0.0979631	0.838294	0.926977	Eri1	S
ENSMUSG00000059119	16761.9	0.0104866	0.061386	0.851438	0.933915	Nap1l4	S
ENSMUSG00000028933	1079.41	-0.0221184	0.140303	0.851814	0.93398	Xrcc2	S
ENSMUSG00000028629	1690.96	-0.0159473	0.100712	0.862176	0.938936	Exo5	S
ENSMUSG00000006715	8675.4	0.00980831	0.0905039	0.87306	0.944115	Gmnn	S
ENSMUSG00000038628	6514.66	-0.0181764	0.10535	0.873238	0.944185	Polr3k	S
ENSMUSG00000037572	5657.26	-0.0171287	0.126659	0.875492	0.945134	Wdhd1	S
ENSMUSG00000025001	9354.77	-0.0166644	0.119023	0.877004	0.945658	Hells	S
ENSMUSG00000002748	5656.53	0.0144909	0.116529	0.881177	0.948303	Baz1b	S
ENSMUSG00000042029	8888.31	0.0214714	0.158712	0.881124	0.948303	Ncapg2	S
ENSMUSG00000056919	733.406	-0.0151662	0.11438	0.881511	0.948422	Cep162	S
ENSMUSG00000014355	8477.41	0.018413	0.15814	0.88611	0.950804	Anapc1	S
ENSMUSG00000031546	4593.36	0.0125614	0.0930458	0.886726	0.950918	Gins4	S
ENSMUSG00000022604	865.287	-0.0107505	0.129313	0.920977	0.967156	Cep97	S
ENSMUSG00000027067	37726.3	-0.0065833	0.0590225	0.922029	0.96766	Ssrp1	S
ENSMUSG00000035367	1625.5	-0.00942326	0.1095	0.922432	0.967835	Rmi1	S
ENSMUSG00000007646	1155	-0.00451975	0.084098	0.958338	0.983954	Rad51c	S
ENSMUSG00000017550	2792.47	-0.00256081	0.0901505	0.961701	0.985357	Atad5	S
ENSMUSG00000050107	3516.61	-0.00243766	0.0774384	0.977075	0.991466	Haspin	S
ENSMUSG00000027959	1200.11	-0.00139611	0.125295	0.995641	0.998237	Sass6	S
ENSMUSG00000027699	9900.43	-2.32087	0.121588	1.20103e-82	1.82939e-79	Ect2	G2M
ENSMUSG00000028678	6639.4	-1.07949	0.0845897	2.02261e-38	1.05903e-35	Kif2c	G2M
ENSMUSG00000030677	17265.4	-1.00384	0.0873019	1.08867e-31	4.56016e-29	Kif22	G2M
ENSMUSG00000039298	1471.74	-1.38728	0.128443	2.49863e-28	8.20873e-26	Cdk5rap2	G2M
ENSMUSG00000027330	7150.62	-1.50829	0.152483	2.34554e-24	6.66093e-22	Cdc25b	G2M
ENSMUSG00000027550	1936.18	-1.4831	0.163915	8.54983e-21	1.66573e-18	Lrrcc1	G2M
ENSMUSG00000027306	20379.8	-0.649809	0.0870035	1.08677e-14	1.09035e-12	Nusap1	G2M
ENSMUSG00000033111	713.99	-0.86164	0.125054	5.04668e-13	3.95126e-11	3830406C13Rik	G2M
ENSMUSG00000038070	861.312	-0.96845	0.141749	6.75058e-13	5.16466e-11	Cntln	G2M
ENSMUSG00000037544	7915.03	-0.396076	0.0613433	3.60782e-11	2.05609e-09	Dlgap5	G2M
ENSMUSG00000038943	9957.29	-0.360892	0.0564187	6.07617e-11	3.33791e-09	Prc1	G2M
ENSMUSG00000030654	46451.5	-0.426652	0.0702947	4.37433e-10	2.04726e-08	Arl6ip1	G2M
ENSMUSG00000031360	4484.58	-0.424665	0.0726202	1.1719e-09	5.0737e-08	Ctps2	G2M
ENSMUSG00000069910	2194.65	-0.369256	0.0687253	2.58472e-08	8.34432e-07	Spdl1	G2M
ENSMUSG00000038225	430.697	-0.694379	0.142994	1.42386e-07	3.84168e-06	Primpol	G2M
ENSMUSG00000096472	6382.01	-0.552276	0.114209	2.29311e-07	5.93835e-06	Cdkn2d	G2M
ENSMUSG00000037628	3163.67	-0.482991	0.0992187	2.51093e-07	6.45254e-06	Cdkn3	G2M
ENSMUSG00000002055	7870.05	-0.315886	0.0640469	2.57565e-07	6.5685e-06	Spag5	G2M
ENSMUSG00000027469	16633.7	-0.199841	0.0403029	4.47447e-07	1.0634e-05	Tpx2	G2M
ENSMUSG00000021697	3849.43	-0.434696	0.0920163	6.63831e-07	1.49295e-05	Depdc1b	G2M
ENSMUSG00000037991	1890.57	0.552611	0.119616	7.4415e-07	1.65801e-05	Rmi2	G2M
ENSMUSG00000020268	460.465	0.538211	0.118111	9.33996e-07	2.03235e-05	Lyrm7	G2M
ENSMUSG00000029012	1508.51	-0.446728	0.0977566	1.21317e-06	2.5665e-05	Orc5	G2M
ENSMUSG00000051378	7692.75	-0.292463	0.0634726	1.82696e-06	3.70141e-05	Kif18b	G2M
ENSMUSG00000028551	4081.28	-0.544434	0.124562	2.06236e-06	4.08933e-05	Cdkn2c	G2M
ENSMUSG00000024056	10590.4	-0.406133	0.0916319	2.67994e-06	5.14346e-05	Ndc80	G2M
ENSMUSG00000022033	22863.3	-0.452823	0.109212	7.78307e-06	0.000129242	Pbk	G2M
ENSMUSG00000023015	17594.7	-0.264303	0.0617327	1.02208e-05	0.00016325	Racgap1	G2M
ENSMUSG00000027201	1026.81	-0.40527	0.100161	1.47991e-05	0.000225828	Myef2	G2M
ENSMUSG00000061533	1917.06	-0.50843	0.129178	1.54935e-05	0.000234502	Cep128	G2M
ENSMUSG00000041126	17411.1	-0.400353	0.0998001	1.67802e-05	0.000250068	H2afv	G2M
ENSMUSG00000056531	1126.47	-0.550203	0.14215	1.75018e-05	0.000259966	Ccdc18	G2M
ENSMUSG00000029177	14012.1	-0.309997	0.0753051	1.82682e-05	0.000269441	Cenpa	G2M
ENSMUSG00000022678	9820.48	-0.326122	0.0799283	2.06699e-05	0.000300889	Nde1	G2M
ENSMUSG00000028549	901.965	-0.483867	0.126053	2.62637e-05	0.000368859	Itgb3bp	G2M
ENSMUSG00000034906	15496.1	-0.28556	0.0711229	3.1043e-05	0.000425287	Ncaph	G2M
ENSMUSG00000036777	5515.61	-0.41829	0.108555	3.14462e-05	0.000429406	Anln	G2M
ENSMUSG00000032254	10055	-0.310633	0.0784343	3.42349e-05	0.00046184	Kif23	G2M
ENSMUSG00000034023	2582.41	-0.503024	0.135977	4.12556e-05	0.000540959	Fancd2	G2M
ENSMUSG00000048922	6741.62	-0.221711	0.0552898	4.7229e-05	0.000607775	Cdca2	G2M
ENSMUSG00000014606	6288.4	-0.295805	0.0792027	6.98886e-05	0.000852865	Slc25a11	G2M
ENSMUSG00000022391	11387.7	0.249293	0.0659676	8.99327e-05	0.00105668	Rangap1	G2M
ENSMUSG00000022429	86.9187	-1.03704	0.338748	0.000111572	0.001258	Dmc1	G2M
ENSMUSG00000045328	6890.75	-0.340554	0.0955398	0.000114947	0.00128567	Cenpe	G2M
ENSMUSG00000032218	19857.3	-0.335016	0.0926872	0.000138559	0.00150555	Ccnb2	G2M
ENSMUSG00000020330	9690.69	-0.25299	0.0696126	0.00017523	0.00181907	Hmmr	G2M
ENSMUSG00000051517	4222.43	-0.297052	0.0842281	0.000193136	0.00197679	Arhgef39	G2M
ENSMUSG00000020415	1180.66	-0.25692	0.0726004	0.000215765	0.00217387	Pttg1	G2M
ENSMUSG00000037905	2320.46	0.310923	0.0895113	0.000222335	0.00222534	Bri3bp	G2M
ENSMUSG00000029521	1710.05	-0.348962	0.103111	0.000263324	0.00256362	Chek2	G2M
ENSMUSG00000064128	1577.95	-0.403416	0.12945	0.000514886	0.00448851	Cenpj	G2M
ENSMUSG00000025925	3609.27	-0.318487	0.0989123	0.000517153	0.00450593	Terf1	G2M
ENSMUSG00000027883	3930.48	-0.296523	0.0923169	0.000586479	0.0050135	Gpsm2	G2M
ENSMUSG00000020895	1113.5	0.268001	0.0823616	0.000596529	0.00509162	Tmem107	G2M
ENSMUSG00000018102	381.942	-0.657864	0.239548	0.000613551	0.00520772	Hist1h2bc	G2M
ENSMUSG00000031371	2927.97	-0.27077	0.0837541	0.000636296	0.00536815	Haus7	G2M
ENSMUSG00000037313	21504.3	-0.26147	0.0819816	0.000729028	0.0059965	Tacc3	G2M
ENSMUSG00000034601	1714.57	-0.322175	0.103554	0.000792266	0.00637274	2700049A03Rik	G2M
ENSMUSG00000038481	1983.56	-0.554065	0.20154	0.000857303	0.00680531	Cdk19	G2M
ENSMUSG00000034192	3369.17	0.31676	0.103279	0.000874091	0.00689844	Lsm3	G2M
ENSMUSG00000029464	3352.21	0.232544	0.0736862	0.00095254	0.00738538	Gpn3	G2M
ENSMUSG00000022021	1219.32	-0.284212	0.0929787	0.00106262	0.00806715	Diaph3	G2M
ENSMUSG00000066979	25969.1	-0.208635	0.0663634	0.001113	0.00839258	Bub3	G2M
ENSMUSG00000024370	7289.53	-0.232759	0.0748318	0.00114108	0.00856194	Cdc23	G2M
ENSMUSG00000025154	3316.21	-0.471013	0.174297	0.00133424	0.00978344	Arhgap19	G2M
ENSMUSG00000007035	1236.36	0.306498	0.104069	0.00138596	0.0100658	Msh5	G2M
ENSMUSG00000020808	8785.99	-0.295812	0.103256	0.001566	0.0111205	Pimreg	G2M
ENSMUSG00000023072	1871.73	-0.309486	0.106891	0.00162452	0.0113934	Cep89	G2M
ENSMUSG00000020492	2366.73	-0.379992	0.138905	0.00174488	0.0120808	Ska2	G2M
ENSMUSG00000041133	15139.6	-0.185815	0.0615915	0.00186917	0.0127985	Smc1a	G2M
ENSMUSG00000072082	13287.1	-0.19419	0.0658784	0.00224227	0.0148261	Ccnf	G2M
ENSMUSG00000023505	11706.5	-0.221819	0.0793176	0.00257551	0.0166099	Cdca3	G2M
ENSMUSG00000049932	18020.8	-0.314194	0.116637	0.00283335	0.017894	H2afx	G2M
ENSMUSG00000033752	972.835	0.335239	0.130101	0.00359822	0.0217001	Mnd1	G2M
ENSMUSG00000026790	7245.18	-0.179062	0.0636653	0.00382237	0.0228402	Odf2	G2M
ENSMUSG00000060288	3894.1	0.26118	0.0976878	0.00390194	0.0232163	Ppih	G2M
ENSMUSG00000021965	4015.23	-0.267429	0.101459	0.00422648	0.0247258	Ska3	G2M
ENSMUSG00000069135	5616.96	0.227681	0.0846564	0.00435809	0.0253541	Fgfr1op	G2M
ENSMUSG00000005233	13315.7	-0.298526	0.115449	0.00466107	0.0267361	Spc25	G2M
ENSMUSG00000048327	10095.9	-0.169278	0.0616005	0.00466627	0.0267568	Ckap2l	G2M
ENSMUSG00000038215	1300.08	-0.326585	0.133398	0.00528898	0.0296874	Cep44	G2M
ENSMUSG00000038252	18200.1	-0.226991	0.0884729	0.00612895	0.0333844	Ncapd2	G2M
ENSMUSG00000032221	2816.91	-0.242859	0.0996623	0.00742305	0.0386853	Mns1	G2M
ENSMUSG00000058729	2273.72	-0.271488	0.110886	0.00745098	0.0387818	Lin9	G2M
ENSMUSG00000027160	1369.22	-0.297515	0.12649	0.00763019	0.0394702	Ccdc34	G2M
ENSMUSG00000030867	12248.7	-0.196047	0.078658	0.00823166	0.0417564	Plk1	G2M
ENSMUSG00000022024	2998.78	-0.199995	0.0812324	0.00939898	0.0460828	Sugt1	G2M
ENSMUSG00000028394	5778.52	0.218281	0.0901854	0.00958808	0.0467681	Pole3	G2M
ENSMUSG00000024989	6907.27	-0.219114	0.0925082	0.00990747	0.0480462	Cep55	G2M
ENSMUSG00000037725	5359.37	-0.23135	0.101193	0.0125072	0.0576183	Ckap2	G2M
ENSMUSG00000026605	5295.76	-0.207521	0.0921595	0.0157271	0.0687651	Cenpf	G2M
ENSMUSG00000026239	2643.57	-0.23816	0.110711	0.017044	0.0730736	Pde6d	G2M
ENSMUSG00000019942	18046.7	-0.194894	0.083401	0.0171163	0.0732898	Cdk1	G2M
ENSMUSG00000020914	46292.9	-0.247355	0.11566	0.0172559	0.0736908	Top2a	G2M
ENSMUSG00000006398	22368.4	-0.206368	0.0949722	0.0182296	0.0766466	Cdc20	G2M
ENSMUSG00000044201	2648.24	-0.219585	0.104409	0.0214089	0.0867278	Cdc25c	G2M
ENSMUSG00000068744	1309.2	0.225683	0.107422	0.0215336	0.0871276	Psrc1	G2M
ENSMUSG00000038383	4250.35	0.175439	0.0840927	0.0260014	0.100265	Pigu	G2M
ENSMUSG00000057110	4826.62	-0.209645	0.102561	0.0262472	0.101051	Cntrl	G2M
ENSMUSG00000036223	2624.66	-0.199491	0.0975403	0.02674	0.102383	Ska1	G2M
ENSMUSG00000019845	1760.84	-0.196036	0.0944649	0.026791	0.102555	Tube1	G2M
ENSMUSG00000027496	10622.6	-0.18156	0.0886794	0.0287573	0.10813	Aurka	G2M
ENSMUSG00000026708	4597.86	-0.202186	0.101072	0.0303299	0.112628	Cenpl	G2M
ENSMUSG00000021569	6223.94	0.155086	0.0759881	0.0320498	0.117299	Trip13	G2M
ENSMUSG00000026039	726.063	-0.23644	0.129477	0.0366822	0.130435	Sgo2a	G2M
ENSMUSG00000027184	34076	0.229244	0.124015	0.0387642	0.135758	Caprin1	G2M
ENSMUSG00000028614	6375.13	0.248096	0.139024	0.0388125	0.13582	Ndc1	G2M
ENSMUSG00000001440	7079.04	0.140667	0.0717812	0.0389161	0.136093	Kpnb1	G2M
ENSMUSG00000015880	12467.1	-0.202405	0.109468	0.0399997	0.139016	Ncapg	G2M
ENSMUSG00000022364	2915.27	-0.154737	0.0810381	0.0460989	0.153862	Tbc1d31	G2M
ENSMUSG00000035293	2699.79	-0.253559	0.157152	0.0484146	0.159181	G2e3	G2M
ENSMUSG00000027654	1512.48	-0.24181	0.14486	0.048517	0.15941	Fam83d	G2M
ENSMUSG00000036752	31767.5	-0.119593	0.0630096	0.0500042	0.162937	Tubb4b	G2M
ENSMUSG00000020687	3352.46	-0.191797	0.108939	0.0520538	0.167788	Cdc27	G2M
ENSMUSG00000029516	1175.81	-0.209552	0.1219	0.0525894	0.168914	Cit	G2M
ENSMUSG00000038379	5593.5	-0.169727	0.095641	0.0525907	0.168914	Ttk	G2M
ENSMUSG00000028312	14718.6	-0.136476	0.0748416	0.0541006	0.172428	Smc2	G2M
ENSMUSG00000074476	9524.57	-0.137102	0.076036	0.0596535	0.184613	Spc24	G2M
ENSMUSG00000020235	11015	-0.165849	0.102082	0.0661631	0.199346	Fzr1	G2M
ENSMUSG00000075266	2393.13	-0.169105	0.102485	0.0704049	0.208195	Cenpw	G2M
ENSMUSG00000020897	18185.8	-0.134193	0.0778613	0.071062	0.209473	Aurkb	G2M
ENSMUSG00000021615	595.497	-0.210615	0.135594	0.0710621	0.209473	Xrcc4	G2M
ENSMUSG00000015217	11264.8	-0.142912	0.0847195	0.0714944	0.210156	Hmgb3	G2M
ENSMUSG00000041219	6298.45	-0.174477	0.108871	0.0777963	0.222285	Arhgap11a	G2M
ENSMUSG00000032783	1736.55	-0.148773	0.091047	0.0800729	0.226778	Troap	G2M
ENSMUSG00000036768	6435.78	-0.144744	0.0884049	0.0810832	0.228368	Kif15	G2M
ENSMUSG00000068854	818.596	-0.192	0.12812	0.0836796	0.233708	Hist2h2be	G2M
ENSMUSG00000024660	12918.8	-0.128649	0.082315	0.0887039	0.243788	Incenp	G2M
ENSMUSG00000037020	1839.22	-0.204801	0.146856	0.0957276	0.257079	Wdr62	G2M
ENSMUSG00000034311	6158.28	-0.153545	0.0982328	0.0974394	0.260037	Kif4	G2M
ENSMUSG00000029715	1551.84	0.153963	0.10291	0.10364	0.271666	Pop7	G2M
ENSMUSG00000050628	1043.4	-0.175045	0.123981	0.108177	0.279376	Ubald2	G2M
ENSMUSG00000031262	4840.28	-0.121538	0.0806622	0.111891	0.285957	Cenpi	G2M
ENSMUSG00000041498	609.634	-0.174684	0.127889	0.117467	0.295963	Kif14	G2M
ENSMUSG00000041431	43711.2	-0.137879	0.0975657	0.128414	0.314008	Ccnb1	G2M
ENSMUSG00000047534	6398.37	-0.163996	0.130967	0.131236	0.31849	Mis18bp1	G2M
ENSMUSG00000028873	15862.5	-0.115089	0.0865198	0.131294	0.318538	Cdca8	G2M
ENSMUSG00000033222	3620.3	0.11294	0.0798541	0.138876	0.329911	Ttf2	G2M
ENSMUSG00000041064	2354.03	-0.126002	0.0927431	0.144095	0.338139	Pif1	G2M
ENSMUSG00000026873	981.596	-0.164004	0.131758	0.147107	0.342711	Phf19	G2M
ENSMUSG00000029782	6172.62	0.130526	0.0981757	0.1486	0.344726	Tmem209	G2M
ENSMUSG00000040667	9208.69	-0.111107	0.0808338	0.149499	0.346118	Nup88	G2M
ENSMUSG00000022322	13739.4	-0.133264	0.102049	0.153269	0.351833	Shcbp1	G2M
ENSMUSG00000028175	3501.82	-0.174826	0.153262	0.164313	0.3686	Depdc1a	G2M
ENSMUSG00000025758	8376.31	0.105208	0.0716352	0.16474	0.36931	Plk4	G2M
ENSMUSG00000050555	999.968	-0.144482	0.119544	0.170303	0.377688	Hyls1	G2M
ENSMUSG00000008822	1047.4	-0.149547	0.128262	0.180744	0.392376	Acyp1	G2M
ENSMUSG00000010517	7320.54	-0.0811703	0.0620883	0.183321	0.396178	Faf1	G2M
ENSMUSG00000032815	1428.74	0.116383	0.0950411	0.187341	0.40194	Fanca	G2M
ENSMUSG00000060981	19.9025	-0.157942	0.28281	0.189677	0.404897	Hist1h4h	G2M
ENSMUSG00000001517	5361.04	-0.113598	0.0931625	0.194107	0.411003	Foxm1	G2M
ENSMUSG00000034349	30811.8	-0.143273	0.127264	0.197062	0.414598	Smc4	G2M
ENSMUSG00000029910	11974.6	-0.113795	0.0887412	0.198402	0.416278	Mad2l1	G2M
ENSMUSG00000024260	868.855	-0.132658	0.116092	0.201129	0.420032	Sap130	G2M
ENSMUSG00000003779	10414.7	-0.0626054	0.0519143	0.203519	0.42281	Kif20a	G2M
ENSMUSG00000031756	6312.18	0.101876	0.0841058	0.207598	0.427783	Cenpn	G2M
ENSMUSG00000036403	911.362	-0.158789	0.155905	0.207522	0.427783	Cep135	G2M
ENSMUSG00000027752	7987.96	0.0941738	0.0794379	0.21112	0.432313	Exosc8	G2M
ENSMUSG00000019961	43304.4	-0.106467	0.0903657	0.211797	0.432974	Tmpo	G2M
ENSMUSG00000030641	1981.46	0.125464	0.112283	0.215191	0.437246	Ddias	G2M
ENSMUSG00000002428	2288.81	-0.144082	0.139439	0.222153	0.446251	Hltf	G2M
ENSMUSG00000027379	11947.8	-0.0879477	0.0747625	0.222708	0.446951	Bub1	G2M
ENSMUSG00000031878	3597.07	0.131175	0.127513	0.239166	0.467641	Nae1	G2M
ENSMUSG00000023919	3615.61	-0.105673	0.103797	0.262891	0.496033	Cenpq	G2M
ENSMUSG00000021391	1098.58	-0.136117	0.146433	0.264133	0.497476	Cenpp	G2M
ENSMUSG00000030929	705.646	-0.122399	0.125923	0.266903	0.500556	Eri2	G2M
ENSMUSG00000024542	2269.59	-0.142329	0.157673	0.267957	0.501754	Cep192	G2M
ENSMUSG00000031004	19432.6	-0.0950116	0.0944645	0.270403	0.504578	Mki67	G2M
ENSMUSG00000040084	25148	-0.0626147	0.0669153	0.274308	0.509745	Bub1b	G2M
ENSMUSG00000021902	1080.58	0.105866	0.106233	0.27636	0.512425	Phf7	G2M
ENSMUSG00000072980	3426.05	-0.13595	0.145204	0.278518	0.514706	Oip5	G2M
ENSMUSG00000025630	24359.2	0.0985486	0.0966125	0.280317	0.516292	Hprt	G2M
ENSMUSG00000035683	5194.8	-0.0803968	0.0795081	0.289056	0.525769	Melk	G2M
ENSMUSG00000019715	6371.83	0.0532341	0.0530152	0.302218	0.541366	Gle1	G2M
ENSMUSG00000033952	3457.05	-0.121982	0.13413	0.303167	0.542052	Aspm	G2M
ENSMUSG00000051235	1845.09	-0.123727	0.143315	0.304965	0.544358	Gen1	G2M
ENSMUSG00000026434	9136.67	0.0958825	0.100892	0.310328	0.549648	Nucks1	G2M
ENSMUSG00000044906	1774.38	-0.105427	0.118429	0.317275	0.557752	4930503L19Rik	G2M
ENSMUSG00000051768	5910.81	-0.0787419	0.083659	0.320353	0.560693	Xrcc1	G2M
ENSMUSG00000018362	55891.5	-0.085969	0.0943427	0.327764	0.568273	Kpna2	G2M
ENSMUSG00000022314	13465	-0.0783536	0.0951237	0.333771	0.574752	Rad21	G2M
ENSMUSG00000033036	103.156	0.127454	0.169118	0.334103	0.575028	Gm7879	G2M
ENSMUSG00000020290	20827.6	0.11902	0.150508	0.33813	0.579755	Xpo1	G2M
ENSMUSG00000017716	15920.6	-0.0564404	0.0607736	0.340053	0.581564	Birc5	G2M
ENSMUSG00000021115	9418.57	-0.0669114	0.0728857	0.34001	0.581564	Vrk1	G2M
ENSMUSG00000028068	3314.9	0.0967036	0.116005	0.34652	0.587706	Iqgap3	G2M
ENSMUSG00000026683	12178	0.0722912	0.0802149	0.356819	0.597768	Nuf2	G2M
ENSMUSG00000020309	330.288	0.113386	0.143006	0.357666	0.598373	Chac2	G2M
ENSMUSG00000035351	5251.7	0.0830758	0.0925061	0.369012	0.610169	Nup37	G2M
ENSMUSG00000033031	6868.17	-0.0798459	0.102462	0.394197	0.633126	C330027C09Rik	G2M
ENSMUSG00000068101	3810.2	0.0812897	0.102736	0.398538	0.637227	Cenpm	G2M
ENSMUSG00000048668	1898.36	-0.0596055	0.0753259	0.406578	0.644721	Rhno1	G2M
ENSMUSG00000028832	89660.1	-0.0698857	0.0916111	0.413987	0.651539	Stmn1	G2M
ENSMUSG00000066878	690.786	-0.0911397	0.133625	0.431043	0.666039	Gm10184	G2M
ENSMUSG00000029414	3104.73	-0.098665	0.151734	0.433847	0.668643	Kntc1	G2M
ENSMUSG00000022978	4575.5	-0.0776332	0.112359	0.439318	0.673016	Mis18a	G2M
ENSMUSG00000024795	6292.52	-0.0833022	0.124644	0.446231	0.679135	Kif20b	G2M
ENSMUSG00000058290	4172.02	0.0870928	0.132267	0.446875	0.679596	Espl1	G2M
ENSMUSG00000001403	19956.3	-0.0454779	0.060905	0.449448	0.681947	Ube2c	G2M
ENSMUSG00000028619	893.426	0.075356	0.104912	0.456586	0.688095	Tceanc2	G2M
ENSMUSG00000020493	2025.62	-0.0742355	0.114833	0.472742	0.700576	Prr11	G2M
ENSMUSG00000040549	10869.5	-0.0754272	0.132702	0.508497	0.727509	Ckap5	G2M
ENSMUSG00000054717	94656.4	-0.0585619	0.0939603	0.520581	0.736683	Hmgb2	G2M
ENSMUSG00000026281	7765.32	-0.0376728	0.0594269	0.522642	0.738435	Dtymk	G2M
ENSMUSG00000002297	5213.45	0.0507219	0.0857789	0.52537	0.740335	Dbf4	G2M
ENSMUSG00000059060	545.222	-0.0661867	0.118326	0.526772	0.741399	Rad51b	G2M
ENSMUSG00000026622	8043.28	0.0361709	0.060536	0.534312	0.747593	Nek2	G2M
ENSMUSG00000063172	259.874	0.0671782	0.130157	0.559734	0.765954	Hspb11	G2M
ENSMUSG00000022070	4621.01	-0.0459536	0.0869931	0.579716	0.779171	Bora	G2M
ENSMUSG00000023932	7891.29	0.0385727	0.0798721	0.609521	0.797169	Cdc5l	G2M
ENSMUSG00000079553	1836.09	-0.0586798	0.136283	0.612602	0.79914	Kifc1	G2M
ENSMUSG00000028718	3283.4	-0.0555991	0.127265	0.613127	0.799614	Stil	G2M
ENSMUSG00000037894	93606.5	0.0401242	0.0910536	0.639482	0.816878	H2afz	G2M
ENSMUSG00000036023	6653.71	-0.0383974	0.0984016	0.672402	0.837877	Parp2	G2M
ENSMUSG00000036022	1073.22	-0.038986	0.116435	0.693159	0.850272	Fam122b	G2M
ENSMUSG00000027331	4083.76	0.0302584	0.0789483	0.703105	0.855815	Knstrn	G2M
ENSMUSG00000033589	4444.54	-0.0226125	0.0592055	0.71206	0.860481	Reep4	G2M
ENSMUSG00000034317	12548	0.0372178	0.124312	0.716332	0.862161	Trim59	G2M
ENSMUSG00000059409	6180.61	0.0221579	0.0636848	0.718121	0.863198	Ppp2r5d	G2M
ENSMUSG00000023004	41713.3	-0.0237268	0.0646967	0.726949	0.868018	Tuba1b	G2M
ENSMUSG00000019370	11549	-0.0317247	0.098913	0.729704	0.869882	Calm3	G2M
ENSMUSG00000062248	7960.94	-0.0313069	0.104901	0.730914	0.870581	Cks2	G2M
ENSMUSG00000041879	8617.62	-0.0233008	0.0962031	0.731043	0.870611	Ipo9	G2M
ENSMUSG00000026779	1496.99	-0.0352379	0.119282	0.735448	0.873146	Mastl	G2M
ENSMUSG00000038000	4922	-0.0317608	0.119432	0.757439	0.884383	Acd	G2M
ENSMUSG00000039187	2826.14	0.0256062	0.0927542	0.76711	0.890339	Fanci	G2M
ENSMUSG00000027715	31451.5	-0.0202407	0.0673566	0.770373	0.89221	Ccna2	G2M
ENSMUSG00000035310	2543.88	0.0270938	0.112313	0.782282	0.897378	Lin54	G2M
ENSMUSG00000019992	2337.26	-0.0249412	0.10792	0.794385	0.903409	Mtfr2	G2M
ENSMUSG00000027635	3353.76	0.0213381	0.0847133	0.799232	0.906199	Dsn1	G2M
ENSMUSG00000047044	2042.04	0.0265978	0.0992806	0.799555	0.906326	D030056L22Rik	G2M
ENSMUSG00000027115	5578.42	0.0229329	0.122641	0.817781	0.915944	Kif18a	G2M
ENSMUSG00000040204	52507.8	0.0204028	0.0931866	0.827768	0.921667	Pclaf	G2M
ENSMUSG00000032400	1689.65	0.0169363	0.0835729	0.830679	0.92313	Zwilch	G2M
ENSMUSG00000022385	5328.69	-0.0152578	0.0762986	0.836785	0.926352	Gtse1	G2M
ENSMUSG00000024301	284.27	-0.024834	0.149729	0.839909	0.927481	Kifc5b	G2M
ENSMUSG00000012443	26860.7	-0.0271403	0.112504	0.840138	0.927539	Kif11	G2M
ENSMUSG00000023908	3085.52	-0.0165516	0.0970243	0.853209	0.934812	Pkmyt1	G2M
ENSMUSG00000035365	1341.01	-0.013308	0.083822	0.870539	0.942788	Parpbp	G2M
ENSMUSG00000027326	6177.71	0.0112964	0.139116	0.900745	0.958038	Knl1	G2M
ENSMUSG00000030177	1295.99	-0.0130482	0.132422	0.912478	0.963214	Ccdc77	G2M
ENSMUSG00000023940	6371.73	0.00630751	0.0742908	0.918477	0.966215	Sgo1	G2M
ENSMUSG00000041840	3339.57	0.0110551	0.120669	0.921865	0.967615	Haus1	G2M
ENSMUSG00000019813	2240.29	-0.00607512	0.0867058	0.931108	0.972599	Cep57l1	G2M
ENSMUSG00000003190	352.548	0.00727131	0.125982	0.949735	0.981567	Bcl2l12	G2M
ENSMUSG00000036672	1625.85	0.00539117	0.123858	0.960008	0.984832	Cenpt	G2M
ENSMUSG00000023345	2116.7	-0.00424121	0.101461	0.963826	0.985978	Poc1a	G2M
ENSMUSG00000028044	14823	0.00526092	0.0546776	0.963852	0.985978	Cks1b	G2M
ENSMUSG00000053128	64.3021	0.00324996	0.193661	0.981472	0.993329	Rnf26	G2M
ENSMUSG00000003778	14889.9	0.000452062	0.0664073	0.984985	0.99423	Brd8	G2M
ENSMUSG00000020898	6106.2	-0.00145527	0.0717214	0.993332	0.997499	Ctc1	G2M
ENSMUSG00000027699	9900.43	-2.32087	0.121588	1.20103e-82	1.82939e-79	Ect2	All_Gio
ENSMUSG00000025747	12754.4	-1.14898	0.0766316	7.35973e-52	5.13801e-49	Tyms	All_Gio
ENSMUSG00000028678	6639.4	-1.07949	0.0845897	2.02261e-38	1.05903e-35	Kif2c	All_Gio
ENSMUSG00000030677	17265.4	-1.00384	0.0873019	1.08867e-31	4.56016e-29	Kif22	All_Gio
ENSMUSG00000039298	1471.74	-1.38728	0.128443	2.49863e-28	8.20873e-26	Cdk5rap2	All_Gio
ENSMUSG00000027330	7150.62	-1.50829	0.152483	2.34554e-24	6.66093e-22	Cdc25b	All_Gio
ENSMUSG00000052369	1828.48	-0.987968	0.103256	9.68684e-23	2.53598e-20	Tmem106c	All_Gio
ENSMUSG00000062510	3192.23	-0.649815	0.0677017	1.11782e-22	2.88141e-20	Nsl1	All_Gio
ENSMUSG00000022177	5985.79	-0.779236	0.0816403	1.6206e-22	4.0527e-20	Haus4	All_Gio
ENSMUSG00000027550	1936.18	-1.4831	0.163915	8.54983e-21	1.66573e-18	Lrrcc1	All_Gio
ENSMUSG00000029863	6514.46	-0.964598	0.108117	2.83996e-20	5.22896e-18	Casp2	All_Gio
ENSMUSG00000001525	67884.2	0.660523	0.0784576	5.41839e-18	8.32891e-16	Tubb5	All_Gio
ENSMUSG00000041238	4059.72	-0.50935	0.0625303	6.9512e-17	9.54651e-15	Rbbp8	All_Gio
ENSMUSG00000027306	20379.8	-0.649809	0.0870035	1.08677e-14	1.09035e-12	Nusap1	All_Gio
ENSMUSG00000033111	713.99	-0.86164	0.125054	5.04668e-13	3.95126e-11	3830406C13Rik	All_Gio
ENSMUSG00000041298	622.584	1.06941	0.156082	5.44659e-13	4.18613e-11	Katnal1	All_Gio
ENSMUSG00000038070	861.312	-0.96845	0.141749	6.75058e-13	5.16466e-11	Cntln	All_Gio
ENSMUSG00000037544	7915.03	-0.396076	0.0613433	3.60782e-11	2.05609e-09	Dlgap5	All_Gio
ENSMUSG00000006763	1804.82	-0.752842	0.120597	5.28806e-11	2.93382e-09	Saal1	All_Gio
ENSMUSG00000038943	9957.29	-0.360892	0.0564187	6.07617e-11	3.33791e-09	Prc1	All_Gio
ENSMUSG00000001436	5119.1	0.609742	0.102098	3.99761e-10	1.8786e-08	Slc19a1	All_Gio
ENSMUSG00000030654	46451.5	-0.426652	0.0702947	4.37433e-10	2.04726e-08	Arl6ip1	All_Gio
ENSMUSG00000031360	4484.58	-0.424665	0.0726202	1.1719e-09	5.0737e-08	Ctps2	All_Gio
ENSMUSG00000027424	1551.9	0.365635	0.0670396	1.795e-08	6.12529e-07	Mgme1	All_Gio
ENSMUSG00000022471	19919.1	-0.331736	0.0606829	2.28018e-08	7.50578e-07	Xrcc6	All_Gio
ENSMUSG00000021485	3568.88	-0.512078	0.0984144	2.46195e-08	8.03917e-07	Mxd3	All_Gio
ENSMUSG00000045273	2663.46	-0.627697	0.120116	2.50269e-08	8.13481e-07	Cenph	All_Gio
ENSMUSG00000069910	2194.65	-0.369256	0.0687253	2.58472e-08	8.34432e-07	Spdl1	All_Gio
ENSMUSG00000038225	430.697	-0.694379	0.142994	1.42386e-07	3.84168e-06	Primpol	All_Gio
ENSMUSG00000045751	3831.85	-0.51724	0.105785	1.8464e-07	4.87957e-06	Mms22l	All_Gio
ENSMUSG00000096472	6382.01	-0.552276	0.114209	2.29311e-07	5.93835e-06	Cdkn2d	All_Gio
ENSMUSG00000037628	3163.67	-0.482991	0.0992187	2.51093e-07	6.45254e-06	Cdkn3	All_Gio
ENSMUSG00000002055	7870.05	-0.315886	0.0640469	2.57565e-07	6.5685e-06	Spag5	All_Gio
ENSMUSG00000026187	1684.6	-0.498069	0.104068	3.68703e-07	8.93426e-06	Xrcc5	All_Gio
ENSMUSG00000027469	16633.7	-0.199841	0.0403029	4.47447e-07	1.0634e-05	Tpx2	All_Gio
ENSMUSG00000032782	1407.22	-0.531691	0.114579	6.02013e-07	1.36491e-05	Cntrob	All_Gio
ENSMUSG00000038482	28053	0.36168	0.075395	6.4114e-07	1.44775e-05	Tfdp1	All_Gio
ENSMUSG00000021697	3849.43	-0.434696	0.0920163	6.63831e-07	1.49295e-05	Depdc1b	All_Gio
ENSMUSG00000037991	1890.57	0.552611	0.119616	7.4415e-07	1.65801e-05	Rmi2	All_Gio
ENSMUSG00000022369	1874.88	-0.523578	0.114385	8.77941e-07	1.92538e-05	Mtbp	All_Gio
ENSMUSG00000020268	460.465	0.538211	0.118111	9.33996e-07	2.03235e-05	Lyrm7	All_Gio
ENSMUSG00000029012	1508.51	-0.446728	0.0977566	1.21317e-06	2.5665e-05	Orc5	All_Gio
ENSMUSG00000025364	13094.1	0.477388	0.103938	1.39253e-06	2.92013e-05	Pa2g4	All_Gio
ENSMUSG00000008690	16075.4	-0.368339	0.0799515	1.44631e-06	3.01405e-05	Ncaph2	All_Gio
ENSMUSG00000018666	6115.74	-0.370655	0.0804568	1.52261e-06	3.15135e-05	Cbx1	All_Gio
ENSMUSG00000051378	7692.75	-0.292463	0.0634726	1.82696e-06	3.70141e-05	Kif18b	All_Gio
ENSMUSG00000028551	4081.28	-0.544434	0.124562	2.06236e-06	4.08933e-05	Cdkn2c	All_Gio
ENSMUSG00000017561	13404.5	-0.280831	0.0619538	2.65491e-06	5.10712e-05	Crlf3	All_Gio
ENSMUSG00000024056	10590.4	-0.406133	0.0916319	2.67994e-06	5.14346e-05	Ndc80	All_Gio
ENSMUSG00000026196	636.976	0.674237	0.159028	2.71009e-06	5.19538e-05	Bard1	All_Gio
ENSMUSG00000027353	2621.47	0.408371	0.0941722	4.15882e-06	7.50873e-05	Mcm8	All_Gio
ENSMUSG00000026669	5729.67	0.277442	0.0627065	4.31607e-06	7.78426e-05	Mcm10	All_Gio
ENSMUSG00000039509	7015.77	0.244355	0.0550052	5.41563e-06	9.46181e-05	Nup133	All_Gio
ENSMUSG00000031629	489.962	-0.593364	0.145728	6.82417e-06	0.000115494	Cenpu	All_Gio
ENSMUSG00000022033	22863.3	-0.452823	0.109212	7.78307e-06	0.000129242	Pbk	All_Gio
ENSMUSG00000023015	17594.7	-0.264303	0.0617327	1.02208e-05	0.00016325	Racgap1	All_Gio
ENSMUSG00000027641	8560.35	-0.557842	0.142228	1.30418e-05	0.000201768	Rbl1	All_Gio
ENSMUSG00000027201	1026.81	-0.40527	0.100161	1.47991e-05	0.000225828	Myef2	All_Gio
ENSMUSG00000055660	1687.92	0.42955	0.106706	1.53982e-05	0.000233481	Mettl4	All_Gio
ENSMUSG00000061533	1917.06	-0.50843	0.129178	1.54935e-05	0.000234502	Cep128	All_Gio
ENSMUSG00000041126	17411.1	-0.400353	0.0998001	1.67802e-05	0.000250068	H2afv	All_Gio
ENSMUSG00000043091	10718.3	-0.286819	0.0691767	1.7009e-05	0.000252872	Tuba1c	All_Gio
ENSMUSG00000056531	1126.47	-0.550203	0.14215	1.75018e-05	0.000259966	Ccdc18	All_Gio
ENSMUSG00000029177	14012.1	-0.309997	0.0753051	1.82682e-05	0.000269441	Cenpa	All_Gio
ENSMUSG00000022678	9820.48	-0.326122	0.0799283	2.06699e-05	0.000300889	Nde1	All_Gio
ENSMUSG00000029366	30225.9	-0.443549	0.113902	2.55599e-05	0.000360485	Dck	All_Gio
ENSMUSG00000028549	901.965	-0.483867	0.126053	2.62637e-05	0.000368859	Itgb3bp	All_Gio
ENSMUSG00000043872	1253.78	0.456421	0.11813	2.8671e-05	0.000398327	Zmym1	All_Gio
ENSMUSG00000034906	15496.1	-0.28556	0.0711229	3.1043e-05	0.000425287	Ncaph	All_Gio
ENSMUSG00000036777	5515.61	-0.41829	0.108555	3.14462e-05	0.000429406	Anln	All_Gio
ENSMUSG00000039994	5046.56	0.293386	0.0735229	3.20104e-05	0.000436399	Timeless	All_Gio
ENSMUSG00000032254	10055	-0.310633	0.0784343	3.42349e-05	0.00046184	Kif23	All_Gio
ENSMUSG00000034023	2582.41	-0.503024	0.135977	4.12556e-05	0.000540959	Fancd2	All_Gio
ENSMUSG00000048922	6741.62	-0.221711	0.0552898	4.7229e-05	0.000607775	Cdca2	All_Gio
ENSMUSG00000038544	6729.5	0.200944	0.0507656	5.00411e-05	0.000637595	Inip	All_Gio
ENSMUSG00000047242	652.978	-0.531644	0.148504	5.914e-05	0.000736175	Taf9b	All_Gio
ENSMUSG00000014606	6288.4	-0.295805	0.0792027	6.98886e-05	0.000852865	Slc25a11	All_Gio
ENSMUSG00000007050	4466.54	0.273503	0.0719285	7.42162e-05	0.000900429	Lsm2	All_Gio
ENSMUSG00000020185	1762.85	-0.448865	0.125332	7.90636e-05	0.00095166	E2f7	All_Gio
ENSMUSG00000022391	11387.7	0.249293	0.0659676	8.99327e-05	0.00105668	Rangap1	All_Gio
ENSMUSG00000022429	86.9187	-1.03704	0.338748	0.000111572	0.001258	Dmc1	All_Gio
ENSMUSG00000045328	6890.75	-0.340554	0.0955398	0.000114947	0.00128567	Cenpe	All_Gio
ENSMUSG00000026496	38479.2	0.252428	0.069626	0.000131048	0.00143698	Parp1	All_Gio
ENSMUSG00000032218	19857.3	-0.335016	0.0926872	0.000138559	0.00150555	Ccnb2	All_Gio
ENSMUSG00000037474	12394.6	0.406405	0.11768	0.000161266	0.00170367	Dtl	All_Gio
ENSMUSG00000022234	43830.5	0.320053	0.0917265	0.000165343	0.00173735	Cct5	All_Gio
ENSMUSG00000020330	9690.69	-0.25299	0.0696126	0.00017523	0.00181907	Hmmr	All_Gio
ENSMUSG00000051517	4222.43	-0.297052	0.0842281	0.000193136	0.00197679	Arhgef39	All_Gio
ENSMUSG00000020415	1180.66	-0.25692	0.0726004	0.000215765	0.00217387	Pttg1	All_Gio
ENSMUSG00000037905	2320.46	0.310923	0.0895113	0.000222335	0.00222534	Bri3bp	All_Gio
ENSMUSG00000037443	6829.06	-0.302508	0.0872221	0.000236887	0.00234577	Cep85	All_Gio
ENSMUSG00000029521	1710.05	-0.348962	0.103111	0.000263324	0.00256362	Chek2	All_Gio
ENSMUSG00000044678	98.2316	1.1091	0.402455	0.000316068	0.00298856	Ly6k	All_Gio
ENSMUSG00000039748	5025.66	0.291759	0.0858446	0.000324342	0.00304104	Exo1	All_Gio
ENSMUSG00000020527	285.135	-0.729326	0.252921	0.000333373	0.00312222	Myo19	All_Gio
ENSMUSG00000050410	6824.43	-0.364227	0.114032	0.000444513	0.00398279	Tcf19	All_Gio
ENSMUSG00000040312	1252.75	-0.449457	0.145486	0.000461982	0.00411292	Cchcr1	All_Gio
ENSMUSG00000025646	1327.64	0.331342	0.102952	0.000502198	0.0044008	Atrip	All_Gio
ENSMUSG00000064128	1577.95	-0.403416	0.12945	0.000514886	0.00448851	Cenpj	All_Gio
ENSMUSG00000025925	3609.27	-0.318487	0.0989123	0.000517153	0.00450593	Terf1	All_Gio
ENSMUSG00000029676	3737.48	-0.253822	0.0774897	0.000584353	0.00500043	Pot1a	All_Gio
ENSMUSG00000027883	3930.48	-0.296523	0.0923169	0.000586479	0.0050135	Gpsm2	All_Gio
ENSMUSG00000020895	1113.5	0.268001	0.0823616	0.000596529	0.00509162	Tmem107	All_Gio
ENSMUSG00000018102	381.942	-0.657864	0.239548	0.000613551	0.00520772	Hist1h2bc	All_Gio
ENSMUSG00000031371	2927.97	-0.27077	0.0837541	0.000636296	0.00536815	Haus7	All_Gio
ENSMUSG00000037313	21504.3	-0.26147	0.0819816	0.000729028	0.0059965	Tacc3	All_Gio
ENSMUSG00000005698	14653.1	-0.147553	0.0441932	0.000742045	0.00607078	Ctcf	All_Gio
ENSMUSG00000052798	11292.1	0.21128	0.0661333	0.000755449	0.00615939	Nup107	All_Gio
ENSMUSG00000030322	1952.9	-0.32754	0.106654	0.000781378	0.00630636	Mbd4	All_Gio
ENSMUSG00000034601	1714.57	-0.322175	0.103554	0.000792266	0.00637274	2700049A03Rik	All_Gio
ENSMUSG00000042462	3938.37	0.354761	0.116551	0.000842669	0.00670414	Dctpp1	All_Gio
ENSMUSG00000019773	12386.1	-0.27651	0.0892626	0.000857845	0.00680531	Fbxo5	All_Gio
ENSMUSG00000038481	1983.56	-0.554065	0.20154	0.000857303	0.00680531	Cdk19	All_Gio
ENSMUSG00000034192	3369.17	0.31676	0.103279	0.000874091	0.00689844	Lsm3	All_Gio
ENSMUSG00000043015	1122.69	-0.385599	0.130967	0.000937882	0.00729875	Nemp2	All_Gio
ENSMUSG00000029464	3352.21	0.232544	0.0736862	0.00095254	0.00738538	Gpn3	All_Gio
ENSMUSG00000042208	2561.35	0.392108	0.135054	0.000981973	0.00757851	0610010F05Rik	All_Gio
ENSMUSG00000078762	377.636	-0.413702	0.143376	0.000998457	0.00768449	Haus5	All_Gio
ENSMUSG00000027811	4050.17	-0.323276	0.107045	0.00102753	0.00787569	4930579G24Rik	All_Gio
ENSMUSG00000021048	11713.4	0.345988	0.116424	0.00105773	0.00804097	Mthfd1	All_Gio
ENSMUSG00000029790	1455.11	-0.257825	0.0832748	0.00106124	0.00806401	Cep41	All_Gio
ENSMUSG00000022021	1219.32	-0.284212	0.0929787	0.00106262	0.00806715	Diaph3	All_Gio
ENSMUSG00000066979	25969.1	-0.208635	0.0663634	0.001113	0.00839258	Bub3	All_Gio
ENSMUSG00000024370	7289.53	-0.232759	0.0748318	0.00114108	0.00856194	Cdc23	All_Gio
ENSMUSG00000028282	3961.31	0.369336	0.127569	0.00119231	0.00887871	Casp8ap2	All_Gio
ENSMUSG00000002718	22224.7	0.296609	0.0988641	0.00127285	0.00939498	Cse1l	All_Gio
ENSMUSG00000002319	920.653	0.378103	0.131797	0.00131835	0.00967962	Ipo4	All_Gio
ENSMUSG00000025154	3316.21	-0.471013	0.174297	0.00133424	0.00978344	Arhgap19	All_Gio
ENSMUSG00000007035	1236.36	0.306498	0.104069	0.00138596	0.0100658	Msh5	All_Gio
ENSMUSG00000007739	25643	0.259739	0.0859249	0.0014824	0.010652	Cct4	All_Gio
ENSMUSG00000020808	8785.99	-0.295812	0.103256	0.001566	0.0111205	Pimreg	All_Gio
ENSMUSG00000023072	1871.73	-0.309486	0.106891	0.00162452	0.0113934	Cep89	All_Gio
ENSMUSG00000024833	9943	0.249985	0.0835642	0.00164732	0.0115292	Pola2	All_Gio
ENSMUSG00000021572	2468.77	-0.252109	0.085488	0.00174015	0.0120609	Cep72	All_Gio
ENSMUSG00000020492	2366.73	-0.379992	0.138905	0.00174488	0.0120808	Ska2	All_Gio
ENSMUSG00000041133	15139.6	-0.185815	0.0615915	0.00186917	0.0127985	Smc1a	All_Gio
ENSMUSG00000072082	13287.1	-0.19419	0.0658784	0.00224227	0.0148261	Ccnf	All_Gio
ENSMUSG00000023505	11706.5	-0.221819	0.0793176	0.00257551	0.0166099	Cdca3	All_Gio
ENSMUSG00000024817	5553.34	-0.291287	0.105958	0.00260766	0.0167786	Uhrf2	All_Gio
ENSMUSG00000049932	18020.8	-0.314194	0.116637	0.00283335	0.017894	H2afx	All_Gio
ENSMUSG00000002835	6310.51	0.203463	0.0716513	0.00299149	0.0186329	Chaf1a	All_Gio
ENSMUSG00000039396	7209.23	-0.287511	0.105682	0.00307762	0.0190701	Neil3	All_Gio
ENSMUSG00000029191	8165.64	0.208763	0.0752673	0.00322949	0.0198861	Rfc1	All_Gio
ENSMUSG00000033752	972.835	0.335239	0.130101	0.00359822	0.0217001	Mnd1	All_Gio
ENSMUSG00000026790	7245.18	-0.179062	0.0636653	0.00382237	0.0228402	Odf2	All_Gio
ENSMUSG00000060288	3894.1	0.26118	0.0976878	0.00390194	0.0232163	Ppih	All_Gio
ENSMUSG00000009575	6626.69	0.236094	0.0871241	0.00396674	0.0235282	Cbx5	All_Gio
ENSMUSG00000035024	8993.42	-0.286837	0.110502	0.00419129	0.0245628	Ncapd3	All_Gio
ENSMUSG00000055612	31669.4	0.210721	0.0773276	0.0041993	0.024584	Cdca7	All_Gio
ENSMUSG00000021965	4015.23	-0.267429	0.101459	0.00422648	0.0247258	Ska3	All_Gio
ENSMUSG00000069135	5616.96	0.227681	0.0846564	0.00435809	0.0253541	Fgfr1op	All_Gio
ENSMUSG00000022422	2178.69	-0.305518	0.119608	0.00442742	0.0256772	Dscc1	All_Gio
ENSMUSG00000005233	13315.7	-0.298526	0.115449	0.00466107	0.0267361	Spc25	All_Gio
ENSMUSG00000048327	10095.9	-0.169278	0.0616005	0.00466627	0.0267568	Ckap2l	All_Gio
ENSMUSG00000052926	4162.97	0.200867	0.0741435	0.00473119	0.0270735	Rnaseh2a	All_Gio
ENSMUSG00000028333	30629.5	0.215599	0.0810072	0.0047997	0.0274093	Anp32b	All_Gio
ENSMUSG00000037461	8184.26	0.277614	0.1058	0.00519864	0.0292686	Ints7	All_Gio
ENSMUSG00000038215	1300.08	-0.326585	0.133398	0.00528898	0.0296874	Cep44	All_Gio
ENSMUSG00000026646	1055.07	0.299088	0.120351	0.00555876	0.0308912	Suv39h2	All_Gio
ENSMUSG00000031575	7782.51	-0.136705	0.0508927	0.00601401	0.0328652	Ash2l	All_Gio
ENSMUSG00000038252	18200.1	-0.226991	0.0884729	0.00612895	0.0333844	Ncapd2	All_Gio
ENSMUSG00000036181	384.868	-0.377763	0.167372	0.00651	0.0350048	Hist1h1c	All_Gio
ENSMUSG00000034024	15079.2	0.199896	0.0762847	0.00681779	0.0362641	Cct2	All_Gio
ENSMUSG00000030662	11936.6	0.30553	0.127775	0.0069287	0.0366563	Ipo5	All_Gio
ENSMUSG00000029430	74956	0.223041	0.0890045	0.00712837	0.0374642	Ran	All_Gio
ENSMUSG00000035726	5655.26	0.262447	0.107619	0.00741338	0.0386469	Supt16	All_Gio
ENSMUSG00000032221	2816.91	-0.242859	0.0996623	0.00742305	0.0386853	Mns1	All_Gio
ENSMUSG00000058729	2273.72	-0.271488	0.110886	0.00745098	0.0387818	Lin9	All_Gio
ENSMUSG00000028693	10493.8	0.190992	0.0751225	0.00760363	0.0393449	Nasp	All_Gio
ENSMUSG00000027160	1369.22	-0.297515	0.12649	0.00763019	0.0394702	Ccdc34	All_Gio
ENSMUSG00000030867	12248.7	-0.196047	0.078658	0.00823166	0.0417564	Plk1	All_Gio
ENSMUSG00000034773	1515.5	0.231386	0.0939576	0.00842289	0.0424821	BC030867	All_Gio
ENSMUSG00000022024	2998.78	-0.199995	0.0812324	0.00939898	0.0460828	Sugt1	All_Gio
ENSMUSG00000028394	5778.52	0.218281	0.0901854	0.00958808	0.0467681	Pole3	All_Gio
ENSMUSG00000026245	10776.5	0.195522	0.0795004	0.00970087	0.0471946	Farsb	All_Gio
ENSMUSG00000026037	3384.23	0.20286	0.0863453	0.00979434	0.0475527	Orc2	All_Gio
ENSMUSG00000024989	6907.27	-0.219114	0.0925082	0.00990747	0.0480462	Cep55	All_Gio
ENSMUSG00000028884	15291.2	0.248334	0.10582	0.0101323	0.0488395	Rpa2	All_Gio
ENSMUSG00000026134	5927.25	-0.224909	0.0964017	0.0104164	0.0498931	Prim2	All_Gio
ENSMUSG00000006728	34569.9	0.219167	0.0925182	0.0107404	0.0511671	Cdk4	All_Gio
ENSMUSG00000019952	2601.02	-0.248124	0.108098	0.0108572	0.051597	Poc1b	All_Gio
ENSMUSG00000055884	849.898	0.337268	0.157808	0.0109296	0.051862	Fancm	All_Gio
ENSMUSG00000028453	2097.48	-0.200851	0.0837359	0.0113456	0.053503	Fancg	All_Gio
ENSMUSG00000005470	26836.6	-0.254394	0.113526	0.0114512	0.0538343	Asf1b	All_Gio
ENSMUSG00000037725	5359.37	-0.23135	0.101193	0.0125072	0.0576183	Ckap2	All_Gio
ENSMUSG00000074780	24.7299	-0.600399	0.452673	0.0125867	0.0579207	Anapc15-ps	All_Gio
ENSMUSG00000022142	4040.08	0.28992	0.132509	0.0127807	0.0586527	Nup155	All_Gio
ENSMUSG00000038010	1202.83	-0.311433	0.147976	0.0132645	0.0603406	Ccdc138	All_Gio
ENSMUSG00000006585	5693.22	0.258484	0.116621	0.0137251	0.062106	Cdt1	All_Gio
ENSMUSG00000026709	5557.54	0.186455	0.0802992	0.0143256	0.0641779	Dars2	All_Gio
ENSMUSG00000099517	54.0885	-0.555161	0.433213	0.0146738	0.0653708	Hist1h3g	All_Gio
ENSMUSG00000078773	2134.52	-0.160787	0.0689861	0.0153048	0.0674645	Rad54b	All_Gio
ENSMUSG00000027722	2718.2	0.214664	0.0963555	0.0154559	0.0680049	Spata5	All_Gio
ENSMUSG00000026605	5295.76	-0.207521	0.0921595	0.0157271	0.0687651	Cenpf	All_Gio
ENSMUSG00000026239	2643.57	-0.23816	0.110711	0.017044	0.0730736	Pde6d	All_Gio
ENSMUSG00000019942	18046.7	-0.194894	0.083401	0.0171163	0.0732898	Cdk1	All_Gio
ENSMUSG00000034303	658.875	0.270008	0.129023	0.0172406	0.0736588	Ccdc15	All_Gio
ENSMUSG00000020914	46292.9	-0.247355	0.11566	0.0172559	0.0736908	Top2a	All_Gio
ENSMUSG00000078521	1539.51	0.302483	0.150196	0.0173026	0.0738405	Aunip	All_Gio
ENSMUSG00000006398	22368.4	-0.206368	0.0949722	0.0182296	0.0766466	Cdc20	All_Gio
ENSMUSG00000017499	9541.95	0.179527	0.081429	0.0191354	0.0795964	Cdc6	All_Gio
ENSMUSG00000020358	17446.9	0.155585	0.069339	0.020149	0.0826813	Hnrnpab	All_Gio
ENSMUSG00000007570	905.77	0.230455	0.109051	0.0201936	0.0828058	Fance	All_Gio
ENSMUSG00000044201	2648.24	-0.219585	0.104409	0.0214089	0.0867278	Cdc25c	All_Gio
ENSMUSG00000068744	1309.2	0.225683	0.107422	0.0215336	0.0871276	Psrc1	All_Gio
ENSMUSG00000020652	2876.6	0.168685	0.077114	0.0215553	0.0871944	Cenpo	All_Gio
ENSMUSG00000004880	45083.2	-0.188328	0.0871459	0.0215923	0.087302	Lbr	All_Gio
ENSMUSG00000001416	36013	0.16752	0.0784536	0.0230971	0.0920798	Cct3	All_Gio
ENSMUSG00000028896	11393.4	0.142319	0.0651221	0.0232172	0.0923787	Rcc1	All_Gio
ENSMUSG00000035842	2364.1	-0.193326	0.0907376	0.0235442	0.0933024	Ddx11	All_Gio
ENSMUSG00000021377	19767	-0.227764	0.113034	0.0255779	0.0991114	Dek	All_Gio
ENSMUSG00000040034	2795.94	0.224962	0.111475	0.0256716	0.0993368	Nup43	All_Gio
ENSMUSG00000038383	4250.35	0.175439	0.0840927	0.0260014	0.100265	Pigu	All_Gio
ENSMUSG00000057110	4826.62	-0.209645	0.102561	0.0262472	0.101051	Cntrl	All_Gio
ENSMUSG00000036223	2624.66	-0.199491	0.0975403	0.02674	0.102383	Ska1	All_Gio
ENSMUSG00000019845	1760.84	-0.196036	0.0944649	0.026791	0.102555	Tube1	All_Gio
ENSMUSG00000022960	2441.35	-0.231818	0.116879	0.0268258	0.102641	Donson	All_Gio
ENSMUSG00000022881	9582.9	0.201223	0.0987917	0.027516	0.104689	Rfc4	All_Gio
ENSMUSG00000027845	921.826	-0.233659	0.119536	0.0282791	0.106884	Dclre1b	All_Gio
ENSMUSG00000027203	12305.8	0.148688	0.0709088	0.0284866	0.107474	Dut	All_Gio
ENSMUSG00000002870	35087.1	0.138978	0.0662689	0.0285518	0.107647	Mcm2	All_Gio
ENSMUSG00000027496	10622.6	-0.18156	0.0886794	0.0287573	0.10813	Aurka	All_Gio
ENSMUSG00000048170	11443.6	0.127018	0.0602918	0.0292555	0.109463	Mcmbp	All_Gio
ENSMUSG00000069306	41.9229	-0.41952	0.326761	0.0294289	0.10994	Hist1h4m	All_Gio
ENSMUSG00000026708	4597.86	-0.202186	0.101072	0.0303299	0.112628	Cenpl	All_Gio
ENSMUSG00000022945	9471.44	0.213594	0.11001	0.0311107	0.114813	Chaf1b	All_Gio
ENSMUSG00000021569	6223.94	0.155086	0.0759881	0.0320498	0.117299	Trip13	All_Gio
ENSMUSG00000003868	11248.1	0.217402	0.114555	0.0349515	0.125776	Ruvbl2	All_Gio
ENSMUSG00000044783	14068.6	-0.202292	0.105345	0.0357296	0.127999	Hjurp	All_Gio
ENSMUSG00000026039	726.063	-0.23644	0.129477	0.0366822	0.130435	Sgo2a	All_Gio
ENSMUSG00000031922	5994.86	-0.211024	0.113522	0.0374334	0.13232	Cep57	All_Gio
ENSMUSG00000027184	34076	0.229244	0.124015	0.0387642	0.135758	Caprin1	All_Gio
ENSMUSG00000028614	6375.13	0.248096	0.139024	0.0388125	0.13582	Ndc1	All_Gio
ENSMUSG00000001440	7079.04	0.140667	0.0717812	0.0389161	0.136093	Kpnb1	All_Gio
ENSMUSG00000017861	8476.72	0.147163	0.0733246	0.0397623	0.138462	Mybl2	All_Gio
ENSMUSG00000033762	934.271	0.223608	0.122763	0.039818	0.138557	Recql4	All_Gio
ENSMUSG00000015880	12467.1	-0.202405	0.109468	0.0399997	0.139016	Ncapg	All_Gio
ENSMUSG00000024151	11742.6	0.13808	0.0723554	0.0440358	0.148844	Msh2	All_Gio
ENSMUSG00000033054	2624.59	0.198497	0.109961	0.0442954	0.149567	Npat	All_Gio
ENSMUSG00000034206	619.934	0.313807	0.215605	0.0456143	0.152627	Polq	All_Gio
ENSMUSG00000022364	2915.27	-0.154737	0.0810381	0.0460989	0.153862	Tbc1d31	All_Gio
ENSMUSG00000021177	5224.73	-0.13868	0.073428	0.0467279	0.155435	Tdp1	All_Gio
ENSMUSG00000035293	2699.79	-0.253559	0.157152	0.0484146	0.159181	G2e3	All_Gio
ENSMUSG00000027654	1512.48	-0.24181	0.14486	0.048517	0.15941	Fam83d	All_Gio
ENSMUSG00000031065	3570.29	0.181693	0.099615	0.0494685	0.161789	Cdk16	All_Gio
ENSMUSG00000036752	31767.5	-0.119593	0.0630096	0.0500042	0.162937	Tubb4b	All_Gio
ENSMUSG00000026355	63934.1	0.129075	0.0684013	0.0502397	0.163528	Mcm6	All_Gio
ENSMUSG00000020687	3352.46	-0.191797	0.108939	0.0520538	0.167788	Cdc27	All_Gio
ENSMUSG00000029516	1175.81	-0.209552	0.1219	0.0525894	0.168914	Cit	All_Gio
ENSMUSG00000038379	5593.5	-0.169727	0.095641	0.0525907	0.168914	Ttk	All_Gio
ENSMUSG00000028312	14718.6	-0.136476	0.0748416	0.0541006	0.172428	Smc2	All_Gio
ENSMUSG00000034329	4142.27	-0.185906	0.107416	0.0564844	0.177527	Brip1	All_Gio
ENSMUSG00000048799	2146	-0.23819	0.149608	0.0570423	0.178878	Cep120	All_Gio
ENSMUSG00000038126	1122.53	0.229824	0.142456	0.0580171	0.181188	Mphosph9	All_Gio
ENSMUSG00000025436	939.897	0.20934	0.125148	0.0587447	0.182915	Atp23	All_Gio
ENSMUSG00000020697	2032.96	0.22202	0.138461	0.0591668	0.183882	Lig3	All_Gio
ENSMUSG00000028587	1332.8	0.184088	0.105141	0.0594976	0.184266	Orc1	All_Gio
ENSMUSG00000074476	9524.57	-0.137102	0.076036	0.0596535	0.184613	Spc24	All_Gio
ENSMUSG00000020235	11015	-0.165849	0.102082	0.0661631	0.199346	Fzr1	All_Gio
ENSMUSG00000025742	9600.59	0.183537	0.109731	0.0672733	0.201712	Prps2	All_Gio
ENSMUSG00000075266	2393.13	-0.169105	0.102485	0.0704049	0.208195	Cenpw	All_Gio
ENSMUSG00000020897	18185.8	-0.134193	0.0778613	0.071062	0.209473	Aurkb	All_Gio
ENSMUSG00000021615	595.497	-0.210615	0.135594	0.0710621	0.209473	Xrcc4	All_Gio
ENSMUSG00000015217	11264.8	-0.142912	0.0847195	0.0714944	0.210156	Hmgb3	All_Gio
ENSMUSG00000021929	9260.18	0.235569	0.157799	0.0734263	0.213772	Kpna3	All_Gio
ENSMUSG00000041219	6298.45	-0.174477	0.108871	0.0777963	0.222285	Arhgap11a	All_Gio
ENSMUSG00000026036	1848.5	0.217996	0.147951	0.0784466	0.223723	Nif3l1	All_Gio
ENSMUSG00000019988	3688.92	-0.165284	0.102169	0.0786671	0.224085	Nedd1	All_Gio
ENSMUSG00000032783	1736.55	-0.148773	0.091047	0.0800729	0.226778	Troap	All_Gio
ENSMUSG00000033970	7661.03	-0.174471	0.111746	0.0810975	0.228368	Rfc3	All_Gio
ENSMUSG00000036768	6435.78	-0.144744	0.0884049	0.0810832	0.228368	Kif15	All_Gio
ENSMUSG00000051627	1392.69	-0.22635	0.159756	0.0811167	0.228383	Hist1h1e	All_Gio
ENSMUSG00000032586	3672.69	0.10685	0.0631306	0.0816691	0.22963	Traip	All_Gio
ENSMUSG00000068854	818.596	-0.192	0.12812	0.0836796	0.233708	Hist2h2be	All_Gio
ENSMUSG00000047246	261.662	-0.253593	0.198821	0.0840889	0.234662	Hist1h2be	All_Gio
ENSMUSG00000024258	3972.22	0.153895	0.0958818	0.0848056	0.235885	Polr2d	All_Gio
ENSMUSG00000029730	41325.9	0.118883	0.0719795	0.0861382	0.238605	Mcm7	All_Gio
ENSMUSG00000042699	3014.68	0.210693	0.145185	0.0861854	0.238644	Dhx9	All_Gio
ENSMUSG00000024660	12918.8	-0.128649	0.082315	0.0887039	0.243788	Incenp	All_Gio
ENSMUSG00000042590	6532.9	0.186682	0.123875	0.0893463	0.244709	Ipo11	All_Gio
ENSMUSG00000056394	19989.1	-0.123757	0.0763181	0.0905612	0.247189	Lig1	All_Gio
ENSMUSG00000014074	2760.21	0.191099	0.132206	0.0908346	0.247751	Rnf168	All_Gio
ENSMUSG00000041406	3461.41	0.140386	0.0866002	0.0924867	0.250666	BC055324	All_Gio
ENSMUSG00000060860	8968.23	-0.16492	0.110771	0.0950598	0.255695	Ube2s	All_Gio
ENSMUSG00000037020	1839.22	-0.204801	0.146856	0.0957276	0.257079	Wdr62	All_Gio
ENSMUSG00000004018	1415.33	-0.151858	0.0986821	0.0957945	0.257163	Fancl	All_Gio
ENSMUSG00000051220	5852.59	0.126911	0.0805719	0.0958995	0.257274	Ercc6l	All_Gio
ENSMUSG00000062822	2263.1	-0.15017	0.0978808	0.0961809	0.257677	4833420G17Rik	All_Gio
ENSMUSG00000034311	6158.28	-0.153545	0.0982328	0.0974394	0.260037	Kif4	All_Gio
ENSMUSG00000039231	7091.31	0.0963937	0.0596341	0.0995397	0.263774	Suv39h1	All_Gio
ENSMUSG00000028438	933.486	-0.197994	0.144037	0.102534	0.269442	Kif24	All_Gio
ENSMUSG00000029715	1551.84	0.153963	0.10291	0.10364	0.271666	Pop7	All_Gio
ENSMUSG00000032939	12603.2	0.116068	0.0753355	0.105095	0.274107	Nup93	All_Gio
ENSMUSG00000040520	901.235	-0.240469	0.207742	0.105735	0.275353	Manea	All_Gio
ENSMUSG00000050628	1043.4	-0.175045	0.123981	0.108177	0.279376	Ubald2	All_Gio
ENSMUSG00000005566	20570.6	0.148086	0.0949465	0.110637	0.284008	Trim28	All_Gio
ENSMUSG00000029247	35281.1	0.161542	0.110576	0.111019	0.28451	Paics	All_Gio
ENSMUSG00000032477	4120.05	0.119362	0.0791297	0.111314	0.284962	Cdc25a	All_Gio
ENSMUSG00000031262	4840.28	-0.121538	0.0806622	0.111891	0.285957	Cenpi	All_Gio
ENSMUSG00000020739	13581.4	0.136938	0.0928971	0.113078	0.287805	Nup85	All_Gio
ENSMUSG00000075470	369.439	0.225712	0.195003	0.117222	0.29548	Alg10b	All_Gio
ENSMUSG00000041498	609.634	-0.174684	0.127889	0.117467	0.295963	Kif14	All_Gio
ENSMUSG00000000568	26049.3	0.117624	0.0775882	0.122752	0.304788	Hnrnpd	All_Gio
ENSMUSG00000031971	943.451	-0.160474	0.116693	0.123626	0.306368	Ccsap	All_Gio
ENSMUSG00000032113	4022.94	0.150774	0.107395	0.124513	0.307481	Chek1	All_Gio
ENSMUSG00000041431	43711.2	-0.137879	0.0975657	0.128414	0.314008	Ccnb1	All_Gio
ENSMUSG00000040195	1114.06	-0.2107	0.188568	0.131182	0.318453	Nemp1	All_Gio
ENSMUSG00000047534	6398.37	-0.163996	0.130967	0.131236	0.31849	Mis18bp1	All_Gio
ENSMUSG00000028873	15862.5	-0.115089	0.0865198	0.131294	0.318538	Cdca8	All_Gio
ENSMUSG00000015749	34964.4	-0.101055	0.0723923	0.13511	0.324648	Anp32e	All_Gio
ENSMUSG00000035439	2572.51	-0.148751	0.10934	0.135438	0.325108	Haus8	All_Gio
ENSMUSG00000024974	13180.5	-0.0944492	0.0675535	0.136464	0.326425	Smc3	All_Gio
ENSMUSG00000033222	3620.3	0.11294	0.0798541	0.138876	0.329911	Ttf2	All_Gio
ENSMUSG00000041064	2354.03	-0.126002	0.0927431	0.144095	0.338139	Pif1	All_Gio
ENSMUSG00000054309	9463.36	0.101148	0.072315	0.144694	0.338913	Cpsf3	All_Gio
ENSMUSG00000026873	981.596	-0.164004	0.131758	0.147107	0.342711	Phf19	All_Gio
ENSMUSG00000029782	6172.62	0.130526	0.0981757	0.1486	0.344726	Tmem209	All_Gio
ENSMUSG00000040667	9208.69	-0.111107	0.0808338	0.149499	0.346118	Nup88	All_Gio
ENSMUSG00000022322	13739.4	-0.133264	0.102049	0.153269	0.351833	Shcbp1	All_Gio
ENSMUSG00000016757	2742.83	0.128773	0.0983866	0.155501	0.35492	Ttll12	All_Gio
ENSMUSG00000005732	13617.6	0.125923	0.0961417	0.160254	0.36218	Ranbp1	All_Gio
ENSMUSG00000074909	1122.21	-0.131819	0.103055	0.162496	0.365873	Ranbp6	All_Gio
ENSMUSG00000017146	3134.68	0.158922	0.131817	0.163009	0.366656	Brca1	All_Gio
ENSMUSG00000028175	3501.82	-0.174826	0.153262	0.164313	0.3686	Depdc1a	All_Gio
ENSMUSG00000027454	3025.81	0.111187	0.0838119	0.164664	0.369237	Gins1	All_Gio
ENSMUSG00000025758	8376.31	0.105208	0.0716352	0.16474	0.36931	Plk4	All_Gio
ENSMUSG00000026662	9255.65	-0.0833227	0.0635804	0.170134	0.377413	Sephs1	All_Gio
ENSMUSG00000050555	999.968	-0.144482	0.119544	0.170303	0.377688	Hyls1	All_Gio
ENSMUSG00000061286	3021.77	0.118216	0.0912078	0.170617	0.377946	Exosc5	All_Gio
ENSMUSG00000023953	1276.19	0.154892	0.130886	0.171518	0.379172	Polh	All_Gio
ENSMUSG00000043065	1307.83	-0.134811	0.107582	0.173024	0.381149	Spice1	All_Gio
ENSMUSG00000079555	6248.07	0.140428	0.119155	0.178307	0.389153	Haus3	All_Gio
ENSMUSG00000023942	9207.02	0.108459	0.0856413	0.179619	0.391	Slc29a1	All_Gio
ENSMUSG00000008822	1047.4	-0.149547	0.128262	0.180744	0.392376	Acyp1	All_Gio
ENSMUSG00000019214	4106.41	-0.104941	0.0843339	0.18317	0.396001	Chtf18	All_Gio
ENSMUSG00000010517	7320.54	-0.0811703	0.0620883	0.183321	0.396178	Faf1	All_Gio
ENSMUSG00000030393	923.084	0.16361	0.147251	0.184271	0.397504	Zik1	All_Gio
ENSMUSG00000044934	3875.17	0.148895	0.127913	0.184586	0.397832	Zfp367	All_Gio
ENSMUSG00000032815	1428.74	0.116383	0.0950411	0.187341	0.40194	Fanca	All_Gio
ENSMUSG00000026429	3075.24	-0.129276	0.106887	0.188107	0.40283	Ube2t	All_Gio
ENSMUSG00000019303	2008.74	0.115707	0.0945831	0.189117	0.404372	Psmc3ip	All_Gio
ENSMUSG00000060981	19.9025	-0.157942	0.28281	0.189677	0.404897	Hist1h4h	All_Gio
ENSMUSG00000022673	29813.5	0.0986633	0.0794122	0.191265	0.407145	Mcm4	All_Gio
ENSMUSG00000005370	10758.9	0.136501	0.110899	0.192608	0.409247	Msh6	All_Gio
ENSMUSG00000037608	10755.3	0.115306	0.094948	0.193804	0.410621	Bclaf1	All_Gio
ENSMUSG00000001517	5361.04	-0.113598	0.0931625	0.194107	0.411003	Foxm1	All_Gio
ENSMUSG00000020974	2041.85	0.126507	0.105363	0.194318	0.411242	Pole2	All_Gio
ENSMUSG00000034349	30811.8	-0.143273	0.127264	0.197062	0.414598	Smc4	All_Gio
ENSMUSG00000029910	11974.6	-0.113795	0.0887412	0.198402	0.416278	Mad2l1	All_Gio
ENSMUSG00000024260	868.855	-0.132658	0.116092	0.201129	0.420032	Sap130	All_Gio
ENSMUSG00000020392	10537	-0.0970058	0.0813434	0.202359	0.421635	Cdkn2aipnl	All_Gio
ENSMUSG00000003779	10414.7	-0.0626054	0.0519143	0.203519	0.42281	Kif20a	All_Gio
ENSMUSG00000029466	3859.82	-0.0976065	0.0810355	0.204661	0.424288	Anapc7	All_Gio
ENSMUSG00000031756	6312.18	0.101876	0.0841058	0.207598	0.427783	Cenpn	All_Gio
ENSMUSG00000036403	911.362	-0.158789	0.155905	0.207522	0.427783	Cep135	All_Gio
ENSMUSG00000037846	1016.49	0.120048	0.104006	0.209468	0.430262	Rtkn2	All_Gio
ENSMUSG00000027752	7987.96	0.0941738	0.0794379	0.21112	0.432313	Exosc8	All_Gio
ENSMUSG00000019961	43304.4	-0.106467	0.0903657	0.211797	0.432974	Tmpo	All_Gio
ENSMUSG00000034021	6051.85	-0.144583	0.133625	0.213736	0.435291	Pds5b	All_Gio
ENSMUSG00000030641	1981.46	0.125464	0.112283	0.215191	0.437246	Ddias	All_Gio
ENSMUSG00000001151	1622.71	-0.137308	0.126575	0.216209	0.438622	Pcnt	All_Gio
ENSMUSG00000000751	20724.2	0.0902999	0.0761536	0.21707	0.439918	Rpa1	All_Gio
ENSMUSG00000020899	1628.27	0.122714	0.110901	0.22025	0.444026	Pfas	All_Gio
ENSMUSG00000002428	2288.81	-0.144082	0.139439	0.222153	0.446251	Hltf	All_Gio
ENSMUSG00000027379	11947.8	-0.0879477	0.0747625	0.222708	0.446951	Bub1	All_Gio
ENSMUSG00000041147	1800.79	0.11479	0.102313	0.224405	0.449159	Brca2	All_Gio
ENSMUSG00000038759	8145.44	0.161097	0.169892	0.226878	0.452716	Nup205	All_Gio
ENSMUSG00000012483	4465.71	-0.122669	0.118382	0.227057	0.452885	Rpa3	All_Gio
ENSMUSG00000073542	2070.42	0.126508	0.117993	0.228396	0.454486	Cep76	All_Gio
ENSMUSG00000039048	3694.06	0.0773866	0.0655734	0.229449	0.4555	Foxred1	All_Gio
ENSMUSG00000019373	8292.06	0.105299	0.0958641	0.235679	0.463039	Cops3	All_Gio
ENSMUSG00000000028	8516.81	0.0851207	0.0755297	0.236791	0.464408	Cdc45	All_Gio
ENSMUSG00000027823	11363.7	0.0964829	0.0875037	0.23842	0.466728	Gmps	All_Gio
ENSMUSG00000033596	9199.51	-0.147932	0.152736	0.238874	0.467399	Rfwd3	All_Gio
ENSMUSG00000031878	3597.07	0.131175	0.127513	0.239166	0.467641	Nae1	All_Gio
ENSMUSG00000031016	6905.78	0.0877753	0.0782723	0.23973	0.468198	Wee1	All_Gio
ENSMUSG00000024590	27369.1	0.117225	0.126371	0.244021	0.473286	Lmnb1	All_Gio
ENSMUSG00000027323	10911.9	0.101273	0.0951394	0.257144	0.489585	Rad51	All_Gio
ENSMUSG00000020794	7905.54	0.119579	0.117911	0.257374	0.489923	Ube2g1	All_Gio
ENSMUSG00000027490	2996.47	-0.0828518	0.0770486	0.261706	0.494715	E2f1	All_Gio
ENSMUSG00000023919	3615.61	-0.105673	0.103797	0.262891	0.496033	Cenpq	All_Gio
ENSMUSG00000021391	1098.58	-0.136117	0.146433	0.264133	0.497476	Cenpp	All_Gio
ENSMUSG00000030528	3142.58	0.11619	0.117253	0.265836	0.499336	Blm	All_Gio
ENSMUSG00000030929	705.646	-0.122399	0.125923	0.266903	0.500556	Eri2	All_Gio
ENSMUSG00000029003	1852.5	0.089714	0.0860593	0.267002	0.50062	Mad2l2	All_Gio
ENSMUSG00000024542	2269.59	-0.142329	0.157673	0.267957	0.501754	Cep192	All_Gio
ENSMUSG00000052533	3343.75	0.120812	0.123928	0.268603	0.502618	Nup188	All_Gio
ENSMUSG00000031004	19432.6	-0.0950116	0.0944645	0.270403	0.504578	Mki67	All_Gio
ENSMUSG00000021537	6608.21	-0.102577	0.10023	0.27105	0.505617	Cetn3	All_Gio
ENSMUSG00000040084	25148	-0.0626147	0.0669153	0.274308	0.509745	Bub1b	All_Gio
ENSMUSG00000021902	1080.58	0.105866	0.106233	0.27636	0.512425	Phf7	All_Gio
ENSMUSG00000072980	3426.05	-0.13595	0.145204	0.278518	0.514706	Oip5	All_Gio
ENSMUSG00000025630	24359.2	0.0985486	0.0966125	0.280317	0.516292	Hprt	All_Gio
ENSMUSG00000029687	17036.5	-0.0789133	0.0771076	0.282983	0.519208	Ezh2	All_Gio
ENSMUSG00000027018	14128.1	0.104925	0.106626	0.285089	0.521641	Hat1	All_Gio
ENSMUSG00000036875	4843.17	0.0752734	0.0750544	0.287585	0.524376	Dna2	All_Gio
ENSMUSG00000040044	7733.58	0.0859748	0.0832449	0.288375	0.525245	Orc3	All_Gio
ENSMUSG00000068394	1206.12	0.137864	0.163956	0.288562	0.525414	Cep152	All_Gio
ENSMUSG00000035683	5194.8	-0.0803968	0.0795081	0.289056	0.525769	Melk	All_Gio
ENSMUSG00000041491	2845.52	0.081143	0.0804828	0.290948	0.528323	Cep78	All_Gio
ENSMUSG00000025358	10200.9	-0.0764197	0.0805334	0.291077	0.528499	Cdk2	All_Gio
ENSMUSG00000041859	43191.6	0.0734358	0.0740655	0.291435	0.529036	Mcm3	All_Gio
ENSMUSG00000021671	1812.66	-0.0729067	0.0722484	0.291813	0.529406	Poc5	All_Gio
ENSMUSG00000025395	10294	-0.0955584	0.0993348	0.295789	0.534225	Prim1	All_Gio
ENSMUSG00000052565	538.536	-0.137252	0.166919	0.295839	0.534225	Hist1h1d	All_Gio
ENSMUSG00000034883	1761.8	0.121742	0.136156	0.299811	0.538176	Lrr1	All_Gio
ENSMUSG00000024800	4039.67	0.0838708	0.0854772	0.300948	0.539639	Rpp30	All_Gio
ENSMUSG00000019715	6371.83	0.0532341	0.0530152	0.302218	0.541366	Gle1	All_Gio
ENSMUSG00000033952	3457.05	-0.121982	0.13413	0.303167	0.542052	Aspm	All_Gio
ENSMUSG00000051235	1845.09	-0.123727	0.143315	0.304965	0.544358	Gen1	All_Gio
ENSMUSG00000028688	604.759	0.0932478	0.0988821	0.308691	0.548185	Toe1	All_Gio
ENSMUSG00000071078	45.0527	0.142386	0.219488	0.310072	0.549472	Nr2c2ap	All_Gio
ENSMUSG00000026434	9136.67	0.0958825	0.100892	0.310328	0.549648	Nucks1	All_Gio
ENSMUSG00000007080	4822.82	0.119591	0.134676	0.310611	0.549784	Pole	All_Gio
ENSMUSG00000044906	1774.38	-0.105427	0.118429	0.317275	0.557752	4930503L19Rik	All_Gio
ENSMUSG00000051768	5910.81	-0.0787419	0.083659	0.320353	0.560693	Xrcc1	All_Gio
ENSMUSG00000018362	55891.5	-0.085969	0.0943427	0.327764	0.568273	Kpna2	All_Gio
ENSMUSG00000022314	13465	-0.0783536	0.0951237	0.333771	0.574752	Rad21	All_Gio
ENSMUSG00000033036	103.156	0.127454	0.169118	0.334103	0.575028	Gm7879	All_Gio
ENSMUSG00000020290	20827.6	0.11902	0.150508	0.33813	0.579755	Xpo1	All_Gio
ENSMUSG00000017716	15920.6	-0.0564404	0.0607736	0.340053	0.581564	Birc5	All_Gio
ENSMUSG00000021115	9418.57	-0.0669114	0.0728857	0.34001	0.581564	Vrk1	All_Gio
ENSMUSG00000028068	3314.9	0.0967036	0.116005	0.34652	0.587706	Iqgap3	All_Gio
ENSMUSG00000058773	3443.47	0.121847	0.164102	0.346681	0.587801	Hist1h1b	All_Gio
ENSMUSG00000062727	43.5573	-0.129938	0.217991	0.34783	0.588703	Hist1h2bk	All_Gio
ENSMUSG00000041346	1772.68	-0.0935052	0.111208	0.348294	0.588996	Wrap53	All_Gio
ENSMUSG00000024691	12163.4	0.0735145	0.0820228	0.349212	0.590002	Fam111a	All_Gio
ENSMUSG00000032264	5092.1	-0.0694136	0.0780867	0.351037	0.591891	Zw10	All_Gio
ENSMUSG00000018809	1371.13	0.079208	0.0900227	0.351438	0.59233	Smyd4	All_Gio
ENSMUSG00000033405	419.959	0.116009	0.15489	0.355927	0.596754	Nudt15	All_Gio
ENSMUSG00000026683	12178	0.0722912	0.0802149	0.356819	0.597768	Nuf2	All_Gio
ENSMUSG00000020309	330.288	0.113386	0.143006	0.357666	0.598373	Chac2	All_Gio
ENSMUSG00000000759	3649.26	-0.0892115	0.104866	0.357827	0.598532	Tubgcp3	All_Gio
ENSMUSG00000027242	715.003	0.102338	0.128036	0.359714	0.60024	Wdr76	All_Gio
ENSMUSG00000040599	3942.2	-0.0754942	0.0899886	0.366554	0.607478	Mis12	All_Gio
ENSMUSG00000035351	5251.7	0.0830758	0.0925061	0.369012	0.610169	Nup37	All_Gio
ENSMUSG00000075031	50.2732	-0.123491	0.207678	0.369265	0.610341	Hist1h2bb	All_Gio
ENSMUSG00000022034	9955.6	-0.0873507	0.10792	0.373636	0.613739	Esco2	All_Gio
ENSMUSG00000060639	410.849	0.0912811	0.114579	0.374671	0.614608	Hist1h4i	All_Gio
ENSMUSG00000037103	1844.02	-0.0857235	0.106643	0.378411	0.618262	Dcaf15	All_Gio
ENSMUSG00000054099	638.19	-0.118537	0.183875	0.379363	0.619394	Slc25a40	All_Gio
ENSMUSG00000020471	10629.5	0.0837115	0.103632	0.381734	0.621443	Pold2	All_Gio
ENSMUSG00000047832	10091.1	-0.0644544	0.0890561	0.388648	0.627764	Cdca4	All_Gio
ENSMUSG00000026999	2996.63	0.0872025	0.113733	0.393819	0.632762	Nup35	All_Gio
ENSMUSG00000033031	6868.17	-0.0798459	0.102462	0.394197	0.633126	C330027C09Rik	All_Gio
ENSMUSG00000032555	8487.69	0.0882652	0.113014	0.394457	0.633483	Topbp1	All_Gio
ENSMUSG00000068101	3810.2	0.0812897	0.102736	0.398538	0.637227	Cenpm	All_Gio
ENSMUSG00000048668	1898.36	-0.0596055	0.0753259	0.406578	0.644721	Rhno1	All_Gio
ENSMUSG00000031669	2286.46	0.0857074	0.115404	0.407417	0.645145	Gins3	All_Gio
ENSMUSG00000028832	89660.1	-0.0698857	0.0916111	0.413987	0.651539	Stmn1	All_Gio
ENSMUSG00000029363	11264.3	-0.0580595	0.0820281	0.420116	0.657609	Rfc5	All_Gio
ENSMUSG00000015478	951.089	-0.0713046	0.0959237	0.421052	0.658336	Rnf5	All_Gio
ENSMUSG00000021597	2492.87	0.0880153	0.130485	0.423369	0.659742	Slf1	All_Gio
ENSMUSG00000032249	1863.66	-0.105388	0.161188	0.427876	0.663494	Anp32a	All_Gio
ENSMUSG00000066878	690.786	-0.0911397	0.133625	0.431043	0.666039	Gm10184	All_Gio
ENSMUSG00000018189	11319.4	-0.0697188	0.0970944	0.431896	0.667012	Uchl5	All_Gio
ENSMUSG00000029414	3104.73	-0.098665	0.151734	0.433847	0.668643	Kntc1	All_Gio
ENSMUSG00000022978	4575.5	-0.0776332	0.112359	0.439318	0.673016	Mis18a	All_Gio
ENSMUSG00000035198	6364.56	-0.0631027	0.100583	0.443824	0.67664	Tubg1	All_Gio
ENSMUSG00000024742	59.1624	0.10136	0.218759	0.444381	0.677304	Fen1	All_Gio
ENSMUSG00000024795	6292.52	-0.0833022	0.124644	0.446231	0.679135	Kif20b	All_Gio
ENSMUSG00000058290	4172.02	0.0870928	0.132267	0.446875	0.679596	Espl1	All_Gio
ENSMUSG00000001403	19956.3	-0.0454779	0.060905	0.449448	0.681947	Ube2c	All_Gio
ENSMUSG00000046591	1546.85	-0.085265	0.131369	0.452273	0.684661	Ticrr	All_Gio
ENSMUSG00000046111	971.515	-0.0871293	0.135655	0.454781	0.686906	Cep295	All_Gio
ENSMUSG00000059791	6020.88	-0.0600434	0.0802207	0.455168	0.687429	Nrm	All_Gio
ENSMUSG00000028619	893.426	0.075356	0.104912	0.456586	0.688095	Tceanc2	All_Gio
ENSMUSG00000046179	3428.87	-0.0661137	0.0877702	0.45944	0.68999	E2f8	All_Gio
ENSMUSG00000027285	2850.17	0.0678511	0.0990046	0.462627	0.693186	Haus2	All_Gio
ENSMUSG00000023104	14430.2	-0.044405	0.0835843	0.472067	0.70032	Rfc2	All_Gio
ENSMUSG00000020493	2025.62	-0.0742355	0.114833	0.472742	0.700576	Prr11	All_Gio
ENSMUSG00000031821	3399.1	0.0703406	0.109085	0.478647	0.704872	Gins2	All_Gio
ENSMUSG00000031577	1189.29	0.0562664	0.0826461	0.482828	0.708039	Tti2	All_Gio
ENSMUSG00000025862	11059.7	-0.08509	0.15184	0.48967	0.712663	Stag2	All_Gio
ENSMUSG00000006678	6602.59	-0.0834187	0.138731	0.491893	0.714617	Pola1	All_Gio
ENSMUSG00000028702	5517.61	-0.0603373	0.0937641	0.49326	0.715511	Rad54l	All_Gio
ENSMUSG00000047757	1512.36	0.0785398	0.135067	0.498425	0.719489	Fancb	All_Gio
ENSMUSG00000032498	3551.8	-0.057492	0.089549	0.499608	0.72027	Mlh1	All_Gio
ENSMUSG00000035455	15151.7	0.0505319	0.079685	0.506216	0.725609	Fignl1	All_Gio
ENSMUSG00000020649	75909.6	-0.056323	0.100244	0.507831	0.727115	Rrm2	All_Gio
ENSMUSG00000040549	10869.5	-0.0754272	0.132702	0.508497	0.727509	Ckap5	All_Gio
ENSMUSG00000068114	1756.94	0.0609261	0.0992813	0.509107	0.728009	Ccdc134	All_Gio
ENSMUSG00000062075	6946.6	0.047551	0.0773673	0.518166	0.734887	Lmnb2	All_Gio
ENSMUSG00000054717	94656.4	-0.0585619	0.0939603	0.520581	0.736683	Hmgb2	All_Gio
ENSMUSG00000026281	7765.32	-0.0376728	0.0594269	0.522642	0.738435	Dtymk	All_Gio
ENSMUSG00000002297	5213.45	0.0507219	0.0857789	0.52537	0.740335	Dbf4	All_Gio
ENSMUSG00000022863	798.907	-0.0635898	0.111019	0.525361	0.740335	Btg3	All_Gio
ENSMUSG00000059060	545.222	-0.0661867	0.118326	0.526772	0.741399	Rad51b	All_Gio
ENSMUSG00000025066	8848.53	-0.0530524	0.0924562	0.533992	0.747392	Sfr1	All_Gio
ENSMUSG00000026622	8043.28	0.0361709	0.060536	0.534312	0.747593	Nek2	All_Gio
ENSMUSG00000021707	5206.86	0.0528105	0.0964642	0.543883	0.75418	Dhfr	All_Gio
ENSMUSG00000063172	259.874	0.0671782	0.130157	0.559734	0.765954	Hspb11	All_Gio
ENSMUSG00000028018	361.549	0.0724432	0.154349	0.564584	0.769074	Gstcd	All_Gio
ENSMUSG00000028560	16030.1	0.040515	0.0821067	0.573771	0.775051	Usp1	All_Gio
ENSMUSG00000004099	28911.2	0.0510116	0.100155	0.574085	0.775397	Dnmt1	All_Gio
ENSMUSG00000028484	11898.4	0.0485026	0.0960377	0.578984	0.778569	Psip1	All_Gio
ENSMUSG00000022070	4621.01	-0.0459536	0.0869931	0.579716	0.779171	Bora	All_Gio
ENSMUSG00000028212	8410.6	0.064098	0.13857	0.582384	0.780435	Ccne2	All_Gio
ENSMUSG00000039055	1687.99	-0.0459413	0.0895637	0.584106	0.78131	Eme1	All_Gio
ENSMUSG00000033904	1969.17	0.0645407	0.139496	0.587093	0.783305	Ccp110	All_Gio
ENSMUSG00000042079	43323.5	-0.0426044	0.0936873	0.59291	0.786581	Hnrnpf	All_Gio
ENSMUSG00000028033	318.36	0.0690717	0.167096	0.594395	0.787591	Kcnq5	All_Gio
ENSMUSG00000051329	6719.47	-0.063329	0.141384	0.598228	0.790295	Nup160	All_Gio
ENSMUSG00000026374	8441.09	-0.0315035	0.062698	0.600597	0.792003	Tsn	All_Gio
ENSMUSG00000055184	658.766	-0.0559899	0.124143	0.606917	0.796084	Fam72a	All_Gio
ENSMUSG00000042489	1725.89	-0.0475003	0.110325	0.608076	0.796646	Clspn	All_Gio
ENSMUSG00000023932	7891.29	0.0385727	0.0798721	0.609521	0.797169	Cdc5l	All_Gio
ENSMUSG00000036202	6258.92	0.0590323	0.12933	0.609804	0.79729	Rif1	All_Gio
ENSMUSG00000002068	4364.73	0.0413914	0.0858191	0.61147	0.798456	Ccne1	All_Gio
ENSMUSG00000079553	1836.09	-0.0586798	0.136283	0.612602	0.79914	Kifc1	All_Gio
ENSMUSG00000028718	3283.4	-0.0555991	0.127265	0.613127	0.799614	Stil	All_Gio
ENSMUSG00000024054	5474.21	0.0652282	0.151083	0.617408	0.802286	Smchd1	All_Gio
ENSMUSG00000030346	5994.86	-0.0447271	0.0980322	0.621424	0.80471	Rad51ap1	All_Gio
ENSMUSG00000030726	8274.89	0.0290799	0.0594352	0.623741	0.806366	Pold3	All_Gio
ENSMUSG00000025872	6170.49	0.0401002	0.0863329	0.624743	0.80706	Thoc3	All_Gio
ENSMUSG00000064288	14.5941	0.0524212	0.239602	0.625463	0.807513	Hist1h4k	All_Gio
ENSMUSG00000031691	1097.07	-0.0566413	0.136476	0.633331	0.812773	Tnpo2	All_Gio
ENSMUSG00000037894	93606.5	0.0401242	0.0910536	0.639482	0.816878	H2afz	All_Gio
ENSMUSG00000023066	851.749	-0.0602332	0.171554	0.64264	0.818754	Rttn	All_Gio
ENSMUSG00000015165	14531.6	0.0335939	0.0798902	0.65366	0.826634	Hnrnpl	All_Gio
ENSMUSG00000004642	34758.9	-0.0469642	0.11837	0.654569	0.827346	Slbp	All_Gio
ENSMUSG00000016619	5353.72	0.0303573	0.0710428	0.657868	0.829126	Nup50	All_Gio
ENSMUSG00000027650	2870.49	0.0382819	0.100316	0.667927	0.835033	Tti1	All_Gio
ENSMUSG00000036023	6653.71	-0.0383974	0.0984016	0.672402	0.837877	Parp2	All_Gio
ENSMUSG00000031697	6073.87	-0.0336348	0.0849577	0.672665	0.837956	Orc6	All_Gio
ENSMUSG00000021461	1138.06	-0.0355026	0.0854974	0.674061	0.83851	Fancc	All_Gio
ENSMUSG00000057406	8948.79	0.0411229	0.105703	0.676899	0.840729	Nsd2	All_Gio
ENSMUSG00000024791	7725.2	0.0317797	0.0788812	0.677162	0.840839	Cdca5	All_Gio
ENSMUSG00000069274	14.0431	-0.0426993	0.239181	0.678991	0.841452	Hist1h4f	All_Gio
ENSMUSG00000038644	26203.5	0.0310304	0.0836101	0.682926	0.843915	Pold1	All_Gio
ENSMUSG00000041712	5389.04	0.0332741	0.0854129	0.686196	0.845711	Ubr7	All_Gio
ENSMUSG00000029283	4111.48	-0.0354574	0.105507	0.690713	0.848649	Cdc7	All_Gio
ENSMUSG00000036022	1073.22	-0.038986	0.116435	0.693159	0.850272	Fam122b	All_Gio
ENSMUSG00000027331	4083.76	0.0302584	0.0789483	0.703105	0.855815	Knstrn	All_Gio
ENSMUSG00000030978	58912.3	0.030838	0.0854929	0.712681	0.860481	Rrm1	All_Gio
ENSMUSG00000033589	4444.54	-0.0226125	0.0592055	0.71206	0.860481	Reep4	All_Gio
ENSMUSG00000034317	12548	0.0372178	0.124312	0.716332	0.862161	Trim59	All_Gio
ENSMUSG00000038047	3059.13	0.0337257	0.10125	0.717061	0.862666	Haus6	All_Gio
ENSMUSG00000031928	3224.12	0.0229841	0.0670372	0.718001	0.863116	Mre11a	All_Gio
ENSMUSG00000059409	6180.61	0.0221579	0.0636848	0.718121	0.863198	Ppp2r5d	All_Gio
ENSMUSG00000021714	4633.82	-0.0443491	0.146323	0.71873	0.863408	Cenpk	All_Gio
ENSMUSG00000023004	41713.3	-0.0237268	0.0646967	0.726949	0.868018	Tuba1b	All_Gio
ENSMUSG00000019370	11549	-0.0317247	0.098913	0.729704	0.869882	Calm3	All_Gio
ENSMUSG00000062248	7960.94	-0.0313069	0.104901	0.730914	0.870581	Cks2	All_Gio
ENSMUSG00000041879	8617.62	-0.0233008	0.0962031	0.731043	0.870611	Ipo9	All_Gio
ENSMUSG00000026779	1496.99	-0.0352379	0.119282	0.735448	0.873146	Mastl	All_Gio
ENSMUSG00000023909	157.401	0.0445959	0.180436	0.736057	0.873339	Paqr4	All_Gio
ENSMUSG00000032397	18844.1	-0.0334987	0.112773	0.740964	0.876017	Tipin	All_Gio
ENSMUSG00000020171	2824.31	0.0272474	0.0847831	0.742096	0.87664	Yeats4	All_Gio
ENSMUSG00000005410	40025.7	-0.0235544	0.0755823	0.743807	0.87764	Mcm5	All_Gio
ENSMUSG00000025574	7970.97	-0.0250946	0.0928255	0.745852	0.878922	Tk1	All_Gio
ENSMUSG00000061607	522.65	0.0421817	0.171052	0.746081	0.879	Mdc1	All_Gio
ENSMUSG00000038000	4922	-0.0317608	0.119432	0.757439	0.884383	Acd	All_Gio
ENSMUSG00000030254	5529.57	-0.0216883	0.0774955	0.765943	0.889662	Rad18	All_Gio
ENSMUSG00000039187	2826.14	0.0256062	0.0927542	0.76711	0.890339	Fanci	All_Gio
ENSMUSG00000026960	3591.68	-0.0354639	0.151984	0.76934	0.891546	Arl6ip6	All_Gio
ENSMUSG00000027715	31451.5	-0.0202407	0.0673566	0.770373	0.89221	Ccna2	All_Gio
ENSMUSG00000069308	33.7906	0.035563	0.22042	0.771055	0.892359	Hist1h2bp	All_Gio
ENSMUSG00000040331	18201.3	-0.0275774	0.0948474	0.772391	0.89298	Nsmce4a	All_Gio
ENSMUSG00000017548	8085.81	0.028554	0.104037	0.781586	0.897271	Suz12	All_Gio
ENSMUSG00000035310	2543.88	0.0270938	0.112313	0.782282	0.897378	Lin54	All_Gio
ENSMUSG00000019992	2337.26	-0.0249412	0.10792	0.794385	0.903409	Mtfr2	All_Gio
ENSMUSG00000021175	5817.5	-0.0198999	0.0824829	0.798262	0.905421	Cdca7l	All_Gio
ENSMUSG00000027635	3353.76	0.0213381	0.0847133	0.799232	0.906199	Dsn1	All_Gio
ENSMUSG00000047044	2042.04	0.0265978	0.0992806	0.799555	0.906326	D030056L22Rik	All_Gio
ENSMUSG00000033364	2482.93	0.0231666	0.100583	0.807793	0.910663	Usp37	All_Gio
ENSMUSG00000027115	5578.42	0.0229329	0.122641	0.817781	0.915944	Kif18a	All_Gio
ENSMUSG00000001228	40932.2	0.0181428	0.0835964	0.81992	0.917604	Uhrf1	All_Gio
ENSMUSG00000049539	371.995	0.0289177	0.159711	0.82263	0.918631	Hist1h1a	All_Gio
ENSMUSG00000040204	52507.8	0.0204028	0.0931866	0.827768	0.921667	Pclaf	All_Gio
ENSMUSG00000032400	1689.65	0.0169363	0.0835729	0.830679	0.92313	Zwilch	All_Gio
ENSMUSG00000027342	43767.2	-0.0188524	0.0985355	0.834779	0.925257	Pcna	All_Gio
ENSMUSG00000022385	5328.69	-0.0152578	0.0762986	0.836785	0.926352	Gtse1	All_Gio
ENSMUSG00000031527	11645	0.0187445	0.0979631	0.838294	0.926977	Eri1	All_Gio
ENSMUSG00000024301	284.27	-0.024834	0.149729	0.839909	0.927481	Kifc5b	All_Gio
ENSMUSG00000012443	26860.7	-0.0271403	0.112504	0.840138	0.927539	Kif11	All_Gio
ENSMUSG00000059119	16761.9	0.0104866	0.061386	0.851438	0.933915	Nap1l4	All_Gio
ENSMUSG00000028933	1079.41	-0.0221184	0.140303	0.851814	0.93398	Xrcc2	All_Gio
ENSMUSG00000023908	3085.52	-0.0165516	0.0970243	0.853209	0.934812	Pkmyt1	All_Gio
ENSMUSG00000028629	1690.96	-0.0159473	0.100712	0.862176	0.938936	Exo5	All_Gio
ENSMUSG00000035365	1341.01	-0.013308	0.083822	0.870539	0.942788	Parpbp	All_Gio
ENSMUSG00000006715	8675.4	0.00980831	0.0905039	0.87306	0.944115	Gmnn	All_Gio
ENSMUSG00000038628	6514.66	-0.0181764	0.10535	0.873238	0.944185	Polr3k	All_Gio
ENSMUSG00000037572	5657.26	-0.0171287	0.126659	0.875492	0.945134	Wdhd1	All_Gio
ENSMUSG00000025001	9354.77	-0.0166644	0.119023	0.877004	0.945658	Hells	All_Gio
ENSMUSG00000002748	5656.53	0.0144909	0.116529	0.881177	0.948303	Baz1b	All_Gio
ENSMUSG00000042029	8888.31	0.0214714	0.158712	0.881124	0.948303	Ncapg2	All_Gio
ENSMUSG00000056919	733.406	-0.0151662	0.11438	0.881511	0.948422	Cep162	All_Gio
ENSMUSG00000014355	8477.41	0.018413	0.15814	0.88611	0.950804	Anapc1	All_Gio
ENSMUSG00000031546	4593.36	0.0125614	0.0930458	0.886726	0.950918	Gins4	All_Gio
ENSMUSG00000027326	6177.71	0.0112964	0.139116	0.900745	0.958038	Knl1	All_Gio
ENSMUSG00000030177	1295.99	-0.0130482	0.132422	0.912478	0.963214	Ccdc77	All_Gio
ENSMUSG00000023940	6371.73	0.00630751	0.0742908	0.918477	0.966215	Sgo1	All_Gio
ENSMUSG00000022604	865.287	-0.0107505	0.129313	0.920977	0.967156	Cep97	All_Gio
ENSMUSG00000041840	3339.57	0.0110551	0.120669	0.921865	0.967615	Haus1	All_Gio
ENSMUSG00000027067	37726.3	-0.0065833	0.0590225	0.922029	0.96766	Ssrp1	All_Gio
ENSMUSG00000035367	1625.5	-0.00942326	0.1095	0.922432	0.967835	Rmi1	All_Gio
ENSMUSG00000019813	2240.29	-0.00607512	0.0867058	0.931108	0.972599	Cep57l1	All_Gio
ENSMUSG00000003190	352.548	0.00727131	0.125982	0.949735	0.981567	Bcl2l12	All_Gio
ENSMUSG00000007646	1155	-0.00451975	0.084098	0.958338	0.983954	Rad51c	All_Gio
ENSMUSG00000036672	1625.85	0.00539117	0.123858	0.960008	0.984832	Cenpt	All_Gio
ENSMUSG00000017550	2792.47	-0.00256081	0.0901505	0.961701	0.985357	Atad5	All_Gio
ENSMUSG00000023345	2116.7	-0.00424121	0.101461	0.963826	0.985978	Poc1a	All_Gio
ENSMUSG00000028044	14823	0.00526092	0.0546776	0.963852	0.985978	Cks1b	All_Gio
ENSMUSG00000050107	3516.61	-0.00243766	0.0774384	0.977075	0.991466	Haspin	All_Gio
ENSMUSG00000053128	64.3021	0.00324996	0.193661	0.981472	0.993329	Rnf26	All_Gio
ENSMUSG00000003778	14889.9	0.000452062	0.0664073	0.984985	0.99423	Brd8	All_Gio
ENSMUSG00000020898	6106.2	-0.00145527	0.0717214	0.993332	0.997499	Ctc1	All_Gio
ENSMUSG00000027959	1200.11	-0.00139611	0.125295	0.995641	0.998237	Sass6	All_Gio
ENSMUSG00000054808	17808.7	-1.56526	0.0441713	1.50898e-276	2.52829e-272	Actn4	All_Genes
ENSMUSG00000006498	8108.6	-2.22478	0.065738	2.51892e-252	2.11023e-248	Ptbp1	All_Genes
ENSMUSG00000041187	4971.39	-2.37642	0.0754368	2.68026e-218	1.49692e-214	Prkd2	All_Genes
ENSMUSG00000039774	1397.5	-3.14961	0.128508	4.43094e-134	1.85601e-130	Galnt12	All_Genes
ENSMUSG00000029171	1189.59	-3.23134	0.141979	2.81948e-116	9.44808e-113	Pgm1	All_Genes
ENSMUSG00000035000	9149.18	-2.62203	0.117063	2.76148e-112	7.71144e-109	Dpp4	All_Genes
ENSMUSG00000028134	6963.23	2.77283	0.127063	5.70592e-107	1.36575e-103	Ptbp2	All_Genes
ENSMUSG00000003379	38082.3	-1.5035	0.0768602	1.75467e-86	3.67493e-83	Cd79a	All_Genes
ENSMUSG00000028923	2595.52	-1.92708	0.0989418	9.80969e-86	1.82624e-82	Necap2	All_Genes
ENSMUSG00000030536	6741.98	-3.14212	0.163312	6.5115e-84	1.091e-80	Iqgap1	All_Genes
ENSMUSG00000027699	9900.43	-2.32087	0.121588	1.20103e-82	1.82939e-79	Ect2	All_Genes
ENSMUSG00000002227	1341.24	-2.03381	0.111583	2.07617e-75	2.89885e-72	Mov10	All_Genes
ENSMUSG00000025188	988.075	-2.12847	0.120721	8.78071e-71	1.1317e-67	Hps1	All_Genes
ENSMUSG00000032058	4272.66	-1.46731	0.0862471	4.58356e-66	5.48554e-63	Ppp2r1b	All_Genes
ENSMUSG00000067567	1106.6	-1.88039	0.111457	4.31301e-65	4.81763e-62	Hdac8	All_Genes
ENSMUSG00000020272	3814.26	-1.98818	0.119502	1.9516e-63	2.04369e-60	Stk10	All_Genes
ENSMUSG00000039345	1036.18	1.91107	0.115883	2.57025e-62	2.53321e-59	Mettl22	All_Genes
ENSMUSG00000026222	2922.29	-1.75899	0.107721	7.80704e-61	7.26705e-58	Sp100	All_Genes
ENSMUSG00000061665	697.05	-2.32467	0.145762	1.66244e-58	1.46601e-55	Cd2ap	All_Genes
ENSMUSG00000054641	3371.21	-2.95657	0.189561	2.47492e-56	2.07337e-53	Mmrn1	All_Genes
ENSMUSG00000021408	1411.37	-2.62979	0.171591	2.36748e-54	1.88891e-51	Ripk1	All_Genes
ENSMUSG00000027940	30410.2	-0.852617	0.0561192	3.90416e-53	2.97338e-50	Tpm3	All_Genes
ENSMUSG00000069805	263.678	-3.20948	0.212714	9.69249e-53	7.06077e-50	Fbp1	All_Genes
ENSMUSG00000025747	12754.4	-1.14898	0.0766316	7.35973e-52	5.13801e-49	Tyms	All_Genes
ENSMUSG00000030533	1424.08	-1.5746	0.109174	2.3407e-48	1.56874e-45	Unc45a	All_Genes
ENSMUSG00000052572	1760.86	-1.89085	0.131426	3.51569e-48	2.26559e-45	Dlg2	All_Genes
ENSMUSG00000059851	2058.74	-0.852706	0.0606712	3.00045e-46	1.86195e-43	Kmt5c	All_Genes
ENSMUSG00000075602	3149.69	2.10089	0.151891	2.11901e-45	1.268e-42	Ly6a	All_Genes
ENSMUSG00000032053	16889.2	-1.09841	0.0800916	8.37717e-44	4.83998e-41	Pou2af1	All_Genes
ENSMUSG00000032556	8293.62	1.17017	0.0868155	1.59566e-42	8.91175e-40	Bfsp2	All_Genes
ENSMUSG00000058126	1757.88	-1.19019	0.0906564	1.63461e-40	8.83481e-38	Tpm3-rs7	All_Genes
ENSMUSG00000028678	6639.4	-1.07949	0.0845897	2.02261e-38	1.05903e-35	Kif2c	All_Genes
ENSMUSG00000108722	201.603	-3.17125	0.251154	5.18349e-38	2.6318e-35	Gm34225	All_Genes
ENSMUSG00000041115	321.718	2.16766	0.172323	1.08847e-37	5.36393e-35	Iqsec2	All_Genes
ENSMUSG00000032936	839.156	1.73342	0.140447	3.27608e-36	1.56831e-33	Camkv	All_Genes
ENSMUSG00000030934	10026.5	-1.02064	0.0828791	6.76436e-36	3.14825e-33	Oat	All_Genes
ENSMUSG00000025538	524.378	-1.71472	0.143632	4.60512e-34	2.08537e-31	Sumf2	All_Genes
ENSMUSG00000066705	1378.79	-2.11806	0.179311	1.66559e-33	7.34395e-31	Fxyd6	All_Genes
ENSMUSG00000061859	665.236	-1.91885	0.163152	3.29564e-33	1.41586e-30	Patj	All_Genes
ENSMUSG00000030677	17265.4	-1.00384	0.0873019	1.08867e-31	4.56016e-29	Kif22	All_Genes
ENSMUSG00000030156	2037.16	1.14564	0.0997051	1.15714e-31	4.72873e-29	Cd69	All_Genes
ENSMUSG00000021288	3708.09	0.865601	0.0758642	4.70726e-31	1.87786e-28	Klc1	All_Genes
ENSMUSG00000104413	903.936	-1.41619	0.125043	6.8063e-31	2.65208e-28	Gm37065	All_Genes
ENSMUSG00000017897	295.369	-2.99539	0.265237	7.32796e-31	2.79045e-28	Eya2	All_Genes
ENSMUSG00000036594	1351.29	2.73403	0.245624	2.79348e-30	1.04011e-27	H2-Aa	All_Genes
ENSMUSG00000020027	4694.33	1.40496	0.127412	1.22149e-29	4.44914e-27	Socs2	All_Genes
ENSMUSG00000030742	669.352	-1.54028	0.14011	2.3004e-29	8.20068e-27	Lat	All_Genes
ENSMUSG00000100455	801.928	1.65614	0.151089	3.31147e-29	1.15591e-26	Gm29170	All_Genes
ENSMUSG00000034401	3322.06	-1.20707	0.111264	6.46756e-29	2.21151e-26	Spata6	All_Genes
ENSMUSG00000022475	4066.12	-1.45355	0.134205	1.01956e-28	3.41654e-26	Hdac7	All_Genes
ENSMUSG00000039298	1471.74	-1.38728	0.128443	2.49863e-28	8.20873e-26	Cdk5rap2	All_Genes
ENSMUSG00000075269	635.512	2.06534	0.195873	3.02606e-27	9.75031e-25	Bex6	All_Genes
ENSMUSG00000062939	1131.04	-1.06346	0.1007	3.66238e-27	1.1578e-24	Stat4	All_Genes
ENSMUSG00000001029	1756.85	-0.96269	0.092143	1.25771e-26	3.90241e-24	Icam2	All_Genes
ENSMUSG00000020585	4068.97	-0.58965	0.0566393	3.65359e-26	1.11302e-23	Laptm4a	All_Genes
ENSMUSG00000031328	3451.98	-3.13451	0.309423	1.49252e-25	4.46556e-23	Flna	All_Genes
ENSMUSG00000097779	660.738	-1.16205	0.115383	5.55169e-25	1.63191e-22	4833407H14Rik	All_Genes
ENSMUSG00000028894	3099.74	-0.792346	0.0789521	8.8974e-25	2.57027e-22	Inpp5b	All_Genes
ENSMUSG00000027330	7150.62	-1.50829	0.152483	2.34554e-24	6.66093e-22	Cdc25b	All_Genes
ENSMUSG00000043773	2153.82	-1.30165	0.132009	4.21097e-24	1.17591e-21	1700048O20Rik	All_Genes
ENSMUSG00000006800	717.629	1.99234	0.205642	2.01791e-23	5.54263e-21	Sulf2	All_Genes
ENSMUSG00000000184	8472.02	0.968332	0.0999139	3.10871e-23	8.40103e-21	Ccnd2	All_Genes
ENSMUSG00000026815	772.647	1.63238	0.17019	4.00982e-23	1.06642e-20	Gfi1b	All_Genes
ENSMUSG00000052369	1828.48	-0.987968	0.103256	9.68684e-23	2.53598e-20	Tmem106c	All_Genes
ENSMUSG00000062510	3192.23	-0.649815	0.0677017	1.11782e-22	2.88141e-20	Nsl1	All_Genes
ENSMUSG00000019832	549.548	-1.99109	0.210926	1.38072e-22	3.50514e-20	Rab32	All_Genes
ENSMUSG00000022177	5985.79	-0.779236	0.0816403	1.6206e-22	4.0527e-20	Haus4	All_Genes
ENSMUSG00000021680	627.861	1.57854	0.16702	1.72573e-22	4.25214e-20	Crhbp	All_Genes
ENSMUSG00000032350	5376.46	-0.905096	0.0952502	1.97649e-22	4.79943e-20	Gclc	All_Genes
ENSMUSG00000020227	1342.35	-0.90522	0.0955947	2.60254e-22	6.22937e-20	Irak3	All_Genes
ENSMUSG00000027007	315.449	-1.64383	0.174677	2.94257e-22	6.94405e-20	Ssfa2	All_Genes
ENSMUSG00000062031	1200.99	-1.07975	0.115168	5.14763e-22	1.1979e-19	Pgghg	All_Genes
ENSMUSG00000028494	2030.17	-0.915681	0.0975593	5.23935e-22	1.20254e-19	Plin2	All_Genes
ENSMUSG00000024065	343.319	2.72344	0.295294	6.98473e-22	1.58147e-19	Ehd3	All_Genes
ENSMUSG00000028419	1725.03	-1.26663	0.136885	1.2467e-21	2.78512e-19	Chmp5	All_Genes
ENSMUSG00000112082	456.305	-1.34563	0.145837	1.75789e-21	3.87545e-19	Gm35035	All_Genes
ENSMUSG00000029298	741.018	-1.90462	0.207108	2.04296e-21	4.44543e-19	Gbp9	All_Genes
ENSMUSG00000023966	3217.1	0.783434	0.0846282	2.39367e-21	5.14178e-19	Rsph9	All_Genes
ENSMUSG00000070504	386.867	-2.8305	0.311256	2.83328e-21	6.00907e-19	Fcrl6	All_Genes
ENSMUSG00000034634	11137.3	1.05282	0.114444	3.02806e-21	6.34189e-19	Ly6d	All_Genes
ENSMUSG00000004105	1145.78	1.45352	0.159828	5.69971e-21	1.179e-18	Angptl2	All_Genes
ENSMUSG00000041135	473.443	-1.57806	0.173804	6.3181e-21	1.29097e-18	Ripk2	All_Genes
ENSMUSG00000039167	832.296	-1.27599	0.140478	6.48821e-21	1.30976e-18	Adgrl4	All_Genes
ENSMUSG00000049551	520.719	1.54583	0.170595	7.97628e-21	1.59098e-18	Fzd9	All_Genes
ENSMUSG00000071454	1108.73	-0.967708	0.10657	8.38781e-21	1.65339e-18	Dtnb	All_Genes
ENSMUSG00000027550	1936.18	-1.4831	0.163915	8.54983e-21	1.66573e-18	Lrrcc1	All_Genes
ENSMUSG00000024426	527.941	1.36298	0.151019	1.14755e-20	2.21002e-18	Atat1	All_Genes
ENSMUSG00000039891	106.83	3.25162	0.365787	1.25834e-20	2.39585e-18	Txlnb	All_Genes
ENSMUSG00000029602	754.022	1.57936	0.176181	1.87955e-20	3.53841e-18	Rasal1	All_Genes
ENSMUSG00000076441	2776.44	0.827449	0.0918065	1.99074e-20	3.70609e-18	Ass1	All_Genes
ENSMUSG00000029863	6514.46	-0.964598	0.108117	2.83996e-20	5.22896e-18	Casp2	All_Genes
ENSMUSG00000090841	8976.87	-0.625291	0.0695861	3.81586e-20	6.94943e-18	Myl6	All_Genes
ENSMUSG00000024610	3036.82	2.59493	0.296565	1.19429e-19	2.15165e-17	Cd74	All_Genes
ENSMUSG00000028525	4696.76	-0.934705	0.106958	2.04812e-19	3.65066e-17	Pde4b	All_Genes
ENSMUSG00000021596	947.223	-1.2718	0.147356	3.34357e-19	5.897e-17	Mctp1	All_Genes
ENSMUSG00000026123	2655.29	-0.581297	0.0665537	3.91023e-19	6.82458e-17	Plekhb2	All_Genes
ENSMUSG00000020888	1592.07	-1.05049	0.121945	4.61796e-19	7.97669e-17	Dvl2	All_Genes
ENSMUSG00000037972	3770.59	-1.07577	0.124225	5.66832e-19	9.6911e-17	Snn	All_Genes
ENSMUSG00000029923	253.448	-1.35309	0.157865	6.27153e-19	1.06141e-16	Rab19	All_Genes
ENSMUSG00000089889	151.73	1.68941	0.197754	7.57493e-19	1.26918e-16	0610040B10Rik	All_Genes
ENSMUSG00000076613	33778.8	1.17481	0.137741	1.06271e-18	1.76295e-16	Ighg2b	All_Genes
ENSMUSG00000019970	3553.33	-1.39238	0.164141	1.41968e-18	2.33203e-16	Sgk1	All_Genes
ENSMUSG00000056220	781.651	-1.27859	0.150976	1.68588e-18	2.74241e-16	Pla2g4a	All_Genes
ENSMUSG00000020437	3687.25	-1.01173	0.119164	1.7235e-18	2.75021e-16	Myo1g	All_Genes
ENSMUSG00000044167	5680.77	-0.679783	0.0795488	1.7218e-18	2.75021e-16	Foxo1	All_Genes
ENSMUSG00000068758	117.875	-2.65989	0.318293	1.81493e-18	2.86878e-16	Il3ra	All_Genes
ENSMUSG00000064373	4455.91	-1.17088	0.139611	3.23352e-18	5.06333e-16	Selenop	All_Genes
ENSMUSG00000033287	421.254	1.0952	0.131139	5.32981e-18	8.2686e-16	Kctd17	All_Genes
ENSMUSG00000001525	67884.2	0.660523	0.0784576	5.41839e-18	8.32891e-16	Tubb5	All_Genes
ENSMUSG00000029096	1131	1.77713	0.217559	6.90846e-18	1.05228e-15	Htra3	All_Genes
ENSMUSG00000074794	1116	-1.40058	0.169915	9.8737e-18	1.4904e-15	Arrdc3	All_Genes
ENSMUSG00000022014	1170.01	-0.774532	0.0932819	1.09949e-17	1.64482e-15	Epsti1	All_Genes
ENSMUSG00000075010	2118.19	-0.778116	0.0941264	1.46368e-17	2.17026e-15	AW112010	All_Genes
ENSMUSG00000066892	1195.55	-1.42475	0.173872	1.5579e-17	2.28971e-15	Fbxl12	All_Genes
ENSMUSG00000028378	5862.11	-0.977337	0.11922	2.25571e-17	3.28647e-15	Ptgr1	All_Genes
ENSMUSG00000026811	591.887	0.982092	0.120093	2.47982e-17	3.58184e-15	St6galnac6	All_Genes
ENSMUSG00000036111	127.102	1.64374	0.202132	2.59954e-17	3.72268e-15	Lmo1	All_Genes
ENSMUSG00000006276	2478.68	-0.82035	0.100336	3.6371e-17	5.16437e-15	Eps15l1	All_Genes
ENSMUSG00000005447	2326.49	-0.847238	0.104099	3.80565e-17	5.35829e-15	Pafah1b3	All_Genes
ENSMUSG00000023008	1215.52	-1.35533	0.167892	4.21893e-17	5.89068e-15	Fmnl3	All_Genes
ENSMUSG00000014668	2032.87	-0.680809	0.0838658	6.29506e-17	8.71684e-15	Chfr	All_Genes
ENSMUSG00000041238	4059.72	-0.50935	0.0625303	6.9512e-17	9.54651e-15	Rbbp8	All_Genes
ENSMUSG00000004552	786.455	-1.25343	0.156858	7.75428e-17	1.05628e-14	Ctse	All_Genes
ENSMUSG00000028464	147.87	1.79721	0.225073	7.88376e-17	1.05674e-14	Tpm2	All_Genes
ENSMUSG00000043411	2870.8	-0.79916	0.0991208	7.84084e-17	1.05674e-14	Usp48	All_Genes
ENSMUSG00000070730	1296.78	-0.683852	0.0847032	8.05195e-17	1.07072e-14	Rmdn3	All_Genes
ENSMUSG00000021123	1133.48	-1.01473	0.126823	9.14189e-17	1.20608e-14	Rdh12	All_Genes
ENSMUSG00000029314	3630.65	-0.975676	0.12148	9.96129e-17	1.30392e-14	Gpat3	All_Genes
ENSMUSG00000000881	319.691	-2.73998	0.346818	1.12505e-16	1.46125e-14	Dlg3	All_Genes
ENSMUSG00000083161	915.075	1.22995	0.154702	1.27315e-16	1.62836e-14	Gm11427	All_Genes
ENSMUSG00000027215	1051.31	-0.957663	0.120243	1.52784e-16	1.93931e-14	Cd82	All_Genes
ENSMUSG00000020788	11141.7	-1.28024	0.16213	1.55194e-16	1.95509e-14	Atp2a3	All_Genes
ENSMUSG00000025357	2819.25	-1.13548	0.143329	1.59334e-16	1.99227e-14	Dgka	All_Genes
ENSMUSG00000060586	474.015	2.21052	0.281582	1.88288e-16	2.33686e-14	H2-Eb1	All_Genes
ENSMUSG00000024222	8339.59	0.472974	0.0586736	1.92624e-16	2.3731e-14	Fkbp5	All_Genes
ENSMUSG00000042215	1630.62	0.754296	0.0947829	2.40202e-16	2.93765e-14	Bag2	All_Genes
ENSMUSG00000049643	2182.06	0.89133	0.112671	2.42332e-16	2.94223e-14	2310022A10Rik	All_Genes
ENSMUSG00000021200	228.183	-1.6207	0.207264	3.24305e-16	3.90915e-14	Asb2	All_Genes
ENSMUSG00000020528	2636.11	0.671003	0.0855168	5.58398e-16	6.68283e-14	Prpsap2	All_Genes
ENSMUSG00000055116	15449.4	-1.10347	0.143985	7.16816e-16	8.51791e-14	Arntl	All_Genes
ENSMUSG00000058099	638.398	-1.1917	0.154142	7.22275e-16	8.52233e-14	Nfam1	All_Genes
ENSMUSG00000016481	4832.57	-0.576958	0.0739796	1.31936e-15	1.54586e-13	Cr1l	All_Genes
ENSMUSG00000032122	1650.14	0.751587	0.0974178	1.37054e-15	1.59468e-13	Slc37a2	All_Genes
ENSMUSG00000043987	2451.32	-0.815654	0.106126	1.51913e-15	1.75539e-13	Cep164	All_Genes
ENSMUSG00000004626	3150.54	-0.6431	0.0832304	1.56832e-15	1.79981e-13	Stxbp2	All_Genes
ENSMUSG00000079339	368.165	-1.7459	0.230695	1.75252e-15	1.99752e-13	Ifit1bl1	All_Genes
ENSMUSG00000048118	2327.83	-0.601507	0.0780704	1.99026e-15	2.25316e-13	Arid4a	All_Genes
ENSMUSG00000026740	763.312	-0.856663	0.112165	2.05486e-15	2.31069e-13	Dnajc1	All_Genes
ENSMUSG00000038418	436.69	-1.4951	0.197523	2.16251e-15	2.41552e-13	Egr1	All_Genes
ENSMUSG00000042675	3816.77	-1.20973	0.160096	2.41766e-15	2.67606e-13	Ypel3	All_Genes
ENSMUSG00000103168	1379.03	-1.31598	0.173918	2.4277e-15	2.67606e-13	Gm30948	All_Genes
ENSMUSG00000025491	368.89	1.97291	0.261734	2.66002e-15	2.91299e-13	Ifitm1	All_Genes
ENSMUSG00000041231	837.793	-1.25072	0.166136	3.23582e-15	3.52053e-13	Ublcp1	All_Genes
ENSMUSG00000022179	278.076	-1.24603	0.165799	3.70538e-15	4.0054e-13	4931414P19Rik	All_Genes
ENSMUSG00000027075	2600.77	-0.575276	0.0752087	4.08007e-15	4.38215e-13	Slc43a1	All_Genes
ENSMUSG00000039715	1671.72	0.890694	0.118216	4.58474e-15	4.89283e-13	Wdr34	All_Genes
ENSMUSG00000004665	2472.21	-0.850823	0.112885	4.64667e-15	4.92753e-13	Cnn2	All_Genes
ENSMUSG00000035637	1701.72	0.993939	0.132401	4.73643e-15	4.99112e-13	Grhpr	All_Genes
ENSMUSG00000031506	9674.75	-0.600945	0.0788719	4.83349e-15	5.06157e-13	Ptpn7	All_Genes
ENSMUSG00000112063	422.807	-1.28067	0.171646	5.56446e-15	5.79084e-13	Gm32220	All_Genes
ENSMUSG00000028517	472.456	-1.12351	0.150825	6.88428e-15	7.12013e-13	Plpp3	All_Genes
ENSMUSG00000030060	2698.95	-0.699738	0.0932185	7.22871e-15	7.43049e-13	Hmces	All_Genes
ENSMUSG00000026664	2079.48	-0.74646	0.100352	9.9463e-15	1.01616e-12	Phyh	All_Genes
ENSMUSG00000037860	695.611	-1.15382	0.156924	1.01376e-14	1.02943e-12	Aim2	All_Genes
ENSMUSG00000003992	3610.61	-0.574066	0.0765257	1.07152e-14	1.08153e-12	Ssbp2	All_Genes
ENSMUSG00000027306	20379.8	-0.649809	0.0870035	1.08677e-14	1.09035e-12	Nusap1	All_Genes
ENSMUSG00000011148	4631.63	0.727666	0.0974373	1.10631e-14	1.10335e-12	Adssl1	All_Genes
ENSMUSG00000024538	578.008	1.06317	0.144342	1.33831e-14	1.32683e-12	Ppic	All_Genes
ENSMUSG00000045679	3823.49	-1.14975	0.156019	1.39566e-14	1.37554e-12	Pqlc3	All_Genes
ENSMUSG00000000903	24534.2	-0.790175	0.106808	1.45137e-14	1.41431e-12	Vpreb3	All_Genes
ENSMUSG00000044694	352.625	1.00091	0.136005	1.45187e-14	1.41431e-12	2010007H06Rik	All_Genes
ENSMUSG00000021567	1008.23	-1.26471	0.172786	1.46624e-14	1.42005e-12	Nkd2	All_Genes
ENSMUSG00000032744	651.744	-3.27141	0.454941	1.71881e-14	1.65509e-12	Heyl	All_Genes
ENSMUSG00000025465	2395.77	-0.522851	0.0702088	1.86813e-14	1.7886e-12	Echs1	All_Genes
ENSMUSG00000025579	2318.04	0.687901	0.0929145	1.88533e-14	1.79481e-12	Gaa	All_Genes
ENSMUSG00000028071	439.238	-1.13994	0.155929	2.06636e-14	1.95603e-12	Sh2d2a	All_Genes
ENSMUSG00000002500	165.62	-2.41611	0.34058	2.2106e-14	2.08082e-12	Rpl3l	All_Genes
ENSMUSG00000028270	1124.2	-1.02792	0.141478	2.33925e-14	2.18962e-12	Gbp2	All_Genes
ENSMUSG00000034614	2311.27	-0.910097	0.124601	2.36115e-14	2.19783e-12	Pik3ip1	All_Genes
ENSMUSG00000026029	8106.85	-0.769084	0.105058	2.43796e-14	2.25679e-12	Casp8	All_Genes
ENSMUSG00000031904	2677	0.463961	0.0625523	3.03737e-14	2.79622e-12	Slc7a6	All_Genes
ENSMUSG00000059027	74.2711	-2.84221	0.395311	3.51287e-14	3.2163e-12	9630013D21Rik	All_Genes
ENSMUSG00000027559	484.909	0.822349	0.113119	3.81774e-14	3.47643e-12	Car3	All_Genes
ENSMUSG00000041974	2105.35	-0.719	0.0992096	4.87129e-14	4.41181e-12	Spidr	All_Genes
ENSMUSG00000022048	2756.92	-0.610872	0.0838451	5.3086e-14	4.78202e-12	Dpysl2	All_Genes
ENSMUSG00000019087	6482.44	-0.562077	0.0768931	5.50124e-14	4.92905e-12	Atp6ap1	All_Genes
ENSMUSG00000030498	823.687	1.17295	0.163836	5.71817e-14	5.09617e-12	Gas2	All_Genes
ENSMUSG00000031813	2193.5	-0.653371	0.091696	5.92784e-14	5.25508e-12	Mvb12a	All_Genes
ENSMUSG00000022831	5775.09	-0.700624	0.0966799	6.61913e-14	5.83703e-12	Hcls1	All_Genes
ENSMUSG00000054675	2956.66	1.00483	0.140839	7.74626e-14	6.79521e-12	Tmem119	All_Genes
ENSMUSG00000037234	792.907	-1.14646	0.161113	7.8003e-14	6.80698e-12	Hook3	All_Genes
ENSMUSG00000051998	1118.93	-0.972508	0.136672	9.18731e-14	7.97583e-12	Lax1	All_Genes
ENSMUSG00000000058	1051.34	-1.5648	0.221738	9.65956e-14	8.34258e-12	Cav2	All_Genes
ENSMUSG00000028655	80.3116	2.61868	0.379142	1.32523e-13	1.13868e-11	Mfsd2a	All_Genes
ENSMUSG00000032436	24590.8	-0.472986	0.0656439	1.43533e-13	1.22699e-11	Cmtm7	All_Genes
ENSMUSG00000036278	615.537	0.857968	0.121372	1.56569e-13	1.33163e-11	Macrod1	All_Genes
ENSMUSG00000021114	5448.82	-0.670846	0.0945175	1.75503e-13	1.48272e-11	Atp6v1d	All_Genes
ENSMUSG00000025878	2488.26	-0.695164	0.0982307	1.76104e-13	1.48272e-11	Uimc1	All_Genes
ENSMUSG00000018509	247.194	1.43212	0.205419	1.95319e-13	1.63629e-11	Cenpv	All_Genes
ENSMUSG00000048924	945.201	-1.07457	0.153932	2.0797e-13	1.7336e-11	Ccdc125	All_Genes
ENSMUSG00000045667	3213.81	-1.55601	0.225179	2.21521e-13	1.83741e-11	Smtnl2	All_Genes
ENSMUSG00000032596	3186.67	-0.815577	0.116472	2.31327e-13	1.9093e-11	Uba7	All_Genes
ENSMUSG00000037847	621.976	-0.922104	0.132209	2.54689e-13	2.09182e-11	Nmrk1	All_Genes
ENSMUSG00000046157	4363.03	0.992187	0.142378	3.11763e-13	2.53572e-11	Tmem229b	All_Genes
ENSMUSG00000028214	378.946	-1.22028	0.17671	3.27549e-13	2.65125e-11	Gem	All_Genes
ENSMUSG00000047434	2621.99	0.493715	0.0697455	3.30835e-13	2.66497e-11	Xxylt1	All_Genes
ENSMUSG00000016262	206.773	-2.92333	0.435499	4.2406e-13	3.39959e-11	Sertad4	All_Genes
ENSMUSG00000026255	286.129	-1.78438	0.261543	4.2656e-13	3.40334e-11	Efhd1	All_Genes
ENSMUSG00000013707	640.744	-0.913976	0.132448	4.6869e-13	3.6868e-11	Tnfaip8l2	All_Genes
ENSMUSG00000026618	4909.62	0.534784	0.0765521	4.67993e-13	3.6868e-11	Iars2	All_Genes
ENSMUSG00000033111	713.99	-0.86164	0.125054	5.04668e-13	3.95126e-11	3830406C13Rik	All_Genes
ENSMUSG00000019188	4275.62	-0.573729	0.0822242	5.14492e-13	3.99653e-11	H13	All_Genes
ENSMUSG00000061086	2255.05	1.25736	0.182848	5.1522e-13	3.99653e-11	Myl4	All_Genes
ENSMUSG00000021938	4193.97	0.642232	0.0925349	5.37375e-13	4.14918e-11	Pspc1	All_Genes
ENSMUSG00000041298	622.584	1.06941	0.156082	5.44659e-13	4.18613e-11	Katnal1	All_Genes
ENSMUSG00000038070	861.312	-0.96845	0.141749	6.75058e-13	5.16466e-11	Cntln	All_Genes
ENSMUSG00000008540	1306.68	-1.13848	0.167757	7.8955e-13	6.01314e-11	Mgst1	All_Genes
ENSMUSG00000028927	758.558	1.2135	0.178971	8.35779e-13	6.33642e-11	Padi2	All_Genes
ENSMUSG00000070643	186.404	1.26907	0.187976	8.91761e-13	6.73038e-11	Sox13	All_Genes
ENSMUSG00000075702	378.033	-1.261	0.186791	9.08493e-13	6.82592e-11	Selenom	All_Genes
ENSMUSG00000039934	436.643	-1.32355	0.197003	1.00293e-12	7.5018e-11	Gsap	All_Genes
ENSMUSG00000020577	35832.3	-0.888456	0.130809	1.00889e-12	7.51285e-11	Tspan13	All_Genes
ENSMUSG00000032298	1445.07	-1.02894	0.152605	1.02837e-12	7.62407e-11	Neil1	All_Genes
ENSMUSG00000012428	651.406	-2.69109	0.405215	1.06966e-12	7.89525e-11	Steap4	All_Genes
ENSMUSG00000029771	2381.84	-0.718639	0.105689	1.2342e-12	9.06974e-11	Irf5	All_Genes
ENSMUSG00000033880	4390.71	0.591914	0.0859443	1.24984e-12	9.14458e-11	Lgals3bp	All_Genes
ENSMUSG00000074272	1061.37	-0.683918	0.100678	1.3904e-12	1.01288e-10	Ceacam1	All_Genes
ENSMUSG00000058470	123.907	-1.93534	0.291618	1.40147e-12	1.01652e-10	Gm8369	All_Genes
ENSMUSG00000027742	3071.97	-0.605487	0.08836	1.60304e-12	1.15772e-10	Cog6	All_Genes
ENSMUSG00000085379	116.5	1.36155	0.204288	1.64378e-12	1.18204e-10	2310058D17Rik	All_Genes
ENSMUSG00000034361	1864.4	0.86857	0.12943	1.73705e-12	1.24377e-10	Cpne2	All_Genes
ENSMUSG00000017756	1846.18	-1.04896	0.157458	1.94608e-12	1.38751e-10	Slc12a7	All_Genes
ENSMUSG00000049744	5778.83	-0.654945	0.097414	2.16043e-12	1.53381e-10	Arhgap15	All_Genes
ENSMUSG00000020034	1562.09	-1.10047	0.165575	2.21927e-12	1.5682e-10	Tcp11l2	All_Genes
ENSMUSG00000072964	5738.29	0.597116	0.0881496	2.22759e-12	1.5682e-10	Bhlhb9	All_Genes
ENSMUSG00000039770	1680.93	-0.893054	0.134647	2.90396e-12	2.02732e-10	Ypel5	All_Genes
ENSMUSG00000059883	431.355	-1.11221	0.168409	2.89278e-12	2.02732e-10	Irak4	All_Genes
ENSMUSG00000025262	249.014	1.95134	0.298295	2.98279e-12	2.07372e-10	Fam120c	All_Genes
ENSMUSG00000026921	1831.92	0.603792	0.0902792	3.31427e-12	2.29466e-10	Egfl7	All_Genes
ENSMUSG00000023348	633.461	-0.797011	0.120368	3.70144e-12	2.55216e-10	Trip6	All_Genes
ENSMUSG00000032515	1439.35	-0.858397	0.130056	3.77588e-12	2.59282e-10	Csrnp1	All_Genes
ENSMUSG00000020423	3189.21	-1.00402	0.153185	3.97618e-12	2.71922e-10	Btg2	All_Genes
ENSMUSG00000069516	5287.57	-0.700798	0.105674	4.12611e-12	2.81029e-10	Lyz2	All_Genes
ENSMUSG00000022519	1183.94	1.11338	0.170296	4.48758e-12	3.0441e-10	Srl	All_Genes
ENSMUSG00000026767	1090.35	-0.657192	0.0994769	4.70964e-12	3.18185e-10	Mindy3	All_Genes
ENSMUSG00000037922	371.282	-1.05804	0.161868	4.73273e-12	3.18461e-10	Bank1	All_Genes
ENSMUSG00000027533	2476.56	0.860719	0.1312	5.07448e-12	3.38737e-10	Fabp5	All_Genes
ENSMUSG00000044734	7897.26	0.763096	0.11586	5.06543e-12	3.38737e-10	Serpinb1a	All_Genes
ENSMUSG00000029299	328.814	-1.47465	0.227884	6.35438e-12	4.22491e-10	Abcg3	All_Genes
ENSMUSG00000003528	11508.4	0.607771	0.092175	6.78006e-12	4.49011e-10	Slc25a1	All_Genes
ENSMUSG00000019872	824.106	-1.11733	0.172584	6.85813e-12	4.5207e-10	Smpdl3a	All_Genes
ENSMUSG00000041538	4666.75	-0.676608	0.103092	6.88021e-12	4.5207e-10	H2-Ob	All_Genes
ENSMUSG00000060675	962.381	-0.758475	0.116364	7.84965e-12	5.13754e-10	Pla2g16	All_Genes
ENSMUSG00000024835	11240.8	-0.508674	0.076838	7.88995e-12	5.14382e-10	Coro1b	All_Genes
ENSMUSG00000028337	4958.11	0.644887	0.0984765	8.23682e-12	5.34915e-10	Coro2a	All_Genes
ENSMUSG00000005506	7126.1	0.660119	0.101127	8.6339e-12	5.58537e-10	Celf1	All_Genes
ENSMUSG00000046480	1134.56	-1.43427	0.223886	8.81023e-12	5.67751e-10	Scn4b	All_Genes
ENSMUSG00000027805	262.236	1.66428	0.263491	9.70372e-12	6.22935e-10	Pfn2	All_Genes
ENSMUSG00000085110	128.254	-1.54209	0.241659	9.89402e-12	6.32726e-10	Gm13920	All_Genes
ENSMUSG00000028093	8562.35	-0.760078	0.1174	1.00425e-11	6.39778e-10	Acp6	All_Genes
ENSMUSG00000021451	5001.01	0.771136	0.119463	1.0642e-11	6.75402e-10	Sema4d	All_Genes
ENSMUSG00000046688	25093.7	-0.828946	0.128535	1.13503e-11	7.1764e-10	Tifa	All_Genes
ENSMUSG00000050379	7210.93	-0.431333	0.0653257	1.17288e-11	7.3878e-10	Sept6	All_Genes
ENSMUSG00000030447	4324.02	-0.580808	0.0895672	1.43252e-11	8.98947e-10	Cyfip1	All_Genes
ENSMUSG00000041353	891.395	-0.833222	0.129842	1.46834e-11	9.17984e-10	Tmem29	All_Genes
ENSMUSG00000020143	5612.1	-1.05688	0.16668	1.58547e-11	9.8387e-10	Dock2	All_Genes
ENSMUSG00000107061	237.538	-1.40066	0.221914	1.58536e-11	9.8387e-10	Gm19590	All_Genes
ENSMUSG00000089718	589.295	0.89939	0.140971	1.59347e-11	9.85187e-10	2310075C17Rik	All_Genes
ENSMUSG00000043263	10177.8	-0.926686	0.145854	1.60344e-11	9.87705e-10	Ifi209	All_Genes
ENSMUSG00000116762	143.074	-2.51551	0.402295	1.70139e-11	1.04421e-09	AC161376.1	All_Genes
ENSMUSG00000040613	922.348	-0.70087	0.10926	1.7448e-11	1.06694e-09	Apobec1	All_Genes
ENSMUSG00000005474	4595.47	0.860279	0.135219	1.82511e-11	1.11199e-09	Myl10	All_Genes
ENSMUSG00000019820	1281.24	-0.8686	0.13638	1.84868e-11	1.12227e-09	Utrn	All_Genes
ENSMUSG00000038393	2244.11	-0.763063	0.119791	2.04131e-11	1.23473e-09	Txnip	All_Genes
ENSMUSG00000116409	710.478	-1.10764	0.176364	2.09922e-11	1.2652e-09	AL611986.1	All_Genes
ENSMUSG00000046985	13148.2	-0.647542	0.101256	2.18914e-11	1.31466e-09	Tapt1	All_Genes
ENSMUSG00000030921	3468.62	-0.678062	0.106423	2.29426e-11	1.37287e-09	Trim30a	All_Genes
ENSMUSG00000046687	694.735	0.802575	0.12666	2.42329e-11	1.44492e-09	Gm5424	All_Genes
ENSMUSG00000032698	1685.1	0.546082	0.0852003	2.48326e-11	1.47543e-09	Lmo2	All_Genes
ENSMUSG00000031712	89.0219	-3.53476	0.571165	2.55933e-11	1.51525e-09	Il15	All_Genes
ENSMUSG00000073481	3873.47	-0.612511	0.095974	2.63866e-11	1.55672e-09	Marc2	All_Genes
ENSMUSG00000033335	6711.46	-0.522178	0.0816236	2.76539e-11	1.62576e-09	Dnm2	All_Genes
ENSMUSG00000024766	1492.37	-0.852105	0.135299	2.8537e-11	1.67181e-09	Lipo3	All_Genes
ENSMUSG00000028689	456.967	-0.857346	0.136344	2.9567e-11	1.72611e-09	Ccdc163	All_Genes
ENSMUSG00000040746	3397.23	-0.679394	0.107354	3.09482e-11	1.80048e-09	Rnf167	All_Genes
ENSMUSG00000024143	709.706	1.60624	0.260139	3.27103e-11	1.8964e-09	Rhoq	All_Genes
ENSMUSG00000031453	9955.69	-0.617418	0.098066	3.2873e-11	1.89927e-09	Rasa3	All_Genes
ENSMUSG00000037071	390.639	1.35337	0.218173	3.39944e-11	1.95731e-09	Scd1	All_Genes
ENSMUSG00000005103	18140.4	-0.388056	0.0600232	3.45789e-11	1.98414e-09	Wdr1	All_Genes
ENSMUSG00000046058	225.231	1.12232	0.180386	3.57676e-11	2.04535e-09	Eid2	All_Genes
ENSMUSG00000037544	7915.03	-0.396076	0.0613433	3.60782e-11	2.05609e-09	Dlgap5	All_Genes
ENSMUSG00000078439	450.991	-0.972138	0.155923	3.70982e-11	2.10705e-09	Smim24	All_Genes
ENSMUSG00000068407	2079.06	0.585506	0.09224	3.7285e-11	2.11051e-09	Rnase12	All_Genes
ENSMUSG00000022708	290.518	-1.26531	0.20558	4.34567e-11	2.44334e-09	Zbtb20	All_Genes
ENSMUSG00000078517	4340.52	0.836036	0.133995	4.36793e-11	2.44765e-09	Emc1	All_Genes
ENSMUSG00000027514	246.308	-1.4332	0.233259	4.81096e-11	2.68692e-09	Zbp1	All_Genes
ENSMUSG00000054517	800.416	1.08598	0.175934	5.10618e-11	2.84233e-09	Trim65	All_Genes
ENSMUSG00000006763	1804.82	-0.752842	0.120597	5.28806e-11	2.93382e-09	Saal1	All_Genes
ENSMUSG00000048215	292.836	-1.91812	0.314828	5.61155e-11	3.10302e-09	A630023P12Rik	All_Genes
ENSMUSG00000029759	860.157	-0.75419	0.121664	5.7696e-11	3.17992e-09	Pon3	All_Genes
ENSMUSG00000038943	9957.29	-0.360892	0.0564187	6.07617e-11	3.33791e-09	Prc1	All_Genes
ENSMUSG00000022504	129.197	2.29528	0.382017	6.66761e-11	3.65084e-09	Ciita	All_Genes
ENSMUSG00000043004	625.685	-0.826942	0.134034	6.81441e-11	3.71907e-09	Gng2	All_Genes
ENSMUSG00000001053	2907.45	-0.859359	0.140008	7.5115e-11	4.08621e-09	N4bp3	All_Genes
ENSMUSG00000041781	7602.5	-0.503302	0.0796744	7.5758e-11	4.10785e-09	Cpsf2	All_Genes
ENSMUSG00000008398	1604.65	-0.779659	0.126599	7.7544e-11	4.19113e-09	Elk3	All_Genes
ENSMUSG00000022768	81.3244	2.12132	0.35114	7.83976e-11	4.22364e-09	Ccdc116	All_Genes
ENSMUSG00000022594	834.998	0.949791	0.155804	8.77484e-11	4.71226e-09	Lynx1	All_Genes
ENSMUSG00000038352	5971.21	-0.636312	0.103594	8.91559e-11	4.77255e-09	Arl5c	All_Genes
ENSMUSG00000066621	1374	-0.852908	0.139691	9.11094e-11	4.86158e-09	Tecpr1	All_Genes
ENSMUSG00000038623	1696.36	-0.471776	0.0753749	9.19633e-11	4.89157e-09	Tm6sf1	All_Genes
ENSMUSG00000003623	2693.3	-0.530813	0.084265	9.27108e-11	4.90342e-09	Crot	All_Genes
ENSMUSG00000032116	18544.4	-0.47062	0.0751584	9.27713e-11	4.90342e-09	Stt3a	All_Genes
ENSMUSG00000037548	402.926	1.34862	0.223517	1.00713e-10	5.30646e-09	H2-DMb2	All_Genes
ENSMUSG00000049625	7132.14	0.416401	0.0663364	1.03247e-10	5.42289e-09	Tifab	All_Genes
ENSMUSG00000031134	4745.31	-0.336695	0.0531328	1.04803e-10	5.4874e-09	Rbmx	All_Genes
ENSMUSG00000017830	801.69	-0.812809	0.133271	1.05184e-10	5.49019e-09	Dhx58	All_Genes
ENSMUSG00000033706	3439.83	0.562141	0.0907784	1.05678e-10	5.49889e-09	Smyd5	All_Genes
ENSMUSG00000034116	13574.7	-0.320326	0.0510732	1.07384e-10	5.57034e-09	Vav1	All_Genes
ENSMUSG00000015224	958.901	-0.899126	0.148309	1.09584e-10	5.64529e-09	Cyp2j9	All_Genes
ENSMUSG00000026687	4944.71	-0.501814	0.0807874	1.09816e-10	5.64529e-09	Aldh9a1	All_Genes
ENSMUSG00000055421	83.1995	-3.7949	0.664067	1.0984e-10	5.64529e-09	Pcdh9	All_Genes
ENSMUSG00000056481	63.6236	2.48713	0.417255	1.27676e-10	6.54191e-09	Cd248	All_Genes
ENSMUSG00000022844	302.562	1.39638	0.233542	1.28865e-10	6.58272e-09	Pdia5	All_Genes
ENSMUSG00000030880	2570.86	0.384867	0.0614413	1.30027e-10	6.62191e-09	Polr3e	All_Genes
ENSMUSG00000052087	652.017	-0.603913	0.0983943	1.30827e-10	6.64244e-09	Rgs14	All_Genes
ENSMUSG00000000552	364.876	0.621143	0.101266	1.31645e-10	6.66377e-09	Zfp385a	All_Genes
ENSMUSG00000042210	1539.31	0.921655	0.153097	1.46219e-10	7.37919e-09	Abhd14a	All_Genes
ENSMUSG00000027478	1160.9	-0.990282	0.165188	1.62543e-10	8.17843e-09	Dnmt3b	All_Genes
ENSMUSG00000079853	61.2232	-2.47152	0.421615	1.82266e-10	9.1433e-09	Klra1	All_Genes
ENSMUSG00000020182	405.81	1.08902	0.182606	1.85879e-10	9.29674e-09	Ddc	All_Genes
ENSMUSG00000063450	616.437	-1.06092	0.178381	1.90922e-10	9.52053e-09	Syne2	All_Genes
ENSMUSG00000037936	6033.35	0.396152	0.0641721	2.09972e-10	1.04394e-08	Scarb1	All_Genes
ENSMUSG00000031402	10877.9	-0.615245	0.102651	2.25163e-10	1.11616e-08	Mpp1	All_Genes
ENSMUSG00000022307	6378.25	-0.581129	0.0959097	2.40349e-10	1.18792e-08	Oxr1	All_Genes
ENSMUSG00000045973	4554.03	0.411567	0.0669312	2.61758e-10	1.28993e-08	Slc25a51	All_Genes
ENSMUSG00000000682	6982.34	0.606317	0.100747	2.65242e-10	1.30326e-08	Cd52	All_Genes
ENSMUSG00000023328	87.6928	2.92281	0.53097	2.70979e-10	1.32369e-08	Ache	All_Genes
ENSMUSG00000025511	990.334	0.787923	0.132178	2.70621e-10	1.32369e-08	Tspan4	All_Genes
ENSMUSG00000042757	2475.12	0.529673	0.0874021	2.81055e-10	1.36892e-08	Tmem108	All_Genes
ENSMUSG00000026585	715.784	-0.651087	0.108962	3.09045e-10	1.50088e-08	Kifap3	All_Genes
ENSMUSG00000031819	3806.35	0.403423	0.0662092	3.15169e-10	1.5262e-08	Emc8	All_Genes
ENSMUSG00000029798	462.29	-1.2088	0.206671	3.18658e-10	1.53865e-08	Herc6	All_Genes
ENSMUSG00000026594	1879.14	0.686482	0.115242	3.23072e-10	1.55548e-08	Ralgps2	All_Genes
ENSMUSG00000020432	988.148	-0.970759	0.16621	3.2981e-10	1.58337e-08	Tcn2	All_Genes
ENSMUSG00000048277	5227.95	0.449691	0.0740439	3.31342e-10	1.58618e-08	Syngr2	All_Genes
ENSMUSG00000086350	173.493	1.27569	0.218458	3.3269e-10	1.5881e-08	B230369F24Rik	All_Genes
ENSMUSG00000025006	322.926	-0.967312	0.165172	3.47525e-10	1.6542e-08	Sorbs1	All_Genes
ENSMUSG00000073791	234.237	-1.2791	0.219706	3.74265e-10	1.77643e-08	Efcab7	All_Genes
ENSMUSG00000022686	1853.89	0.965025	0.16466	3.85086e-10	1.82263e-08	B3gnt5	All_Genes
ENSMUSG00000001436	5119.1	0.609742	0.102098	3.99761e-10	1.8786e-08	Slc19a1	All_Genes
ENSMUSG00000002996	1113.65	-0.863108	0.147017	4.00274e-10	1.8786e-08	Hbp1	All_Genes
ENSMUSG00000041911	64.774	-2.65627	0.461471	3.99115e-10	1.8786e-08	Dlx1	All_Genes
ENSMUSG00000030654	46451.5	-0.426652	0.0702947	4.37433e-10	2.04726e-08	Arl6ip1	All_Genes
ENSMUSG00000061132	42753.4	-0.512524	0.0856806	4.48922e-10	2.09518e-08	Blnk	All_Genes
ENSMUSG00000073557	269.049	1.49502	0.260139	5.23642e-10	2.43712e-08	Ppp1r12b	All_Genes
ENSMUSG00000025656	159.427	-1.62405	0.283245	5.30424e-10	2.46184e-08	Arhgef9	All_Genes
ENSMUSG00000037236	18927.7	0.626172	0.106114	5.3431e-10	2.47303e-08	Matr3	All_Genes
ENSMUSG00000028559	9597.26	-0.503893	0.0846983	5.36376e-10	2.47575e-08	Osbpl9	All_Genes
ENSMUSG00000028434	8246.37	0.537246	0.0905299	5.57911e-10	2.56808e-08	Epb41l4b	All_Genes
ENSMUSG00000028397	1377.86	-0.954142	0.165042	5.66812e-10	2.6019e-08	Kdm4c	All_Genes
ENSMUSG00000025151	2299.89	-0.761224	0.130642	6.11138e-10	2.79771e-08	Maged1	All_Genes
ENSMUSG00000056209	1345.89	0.712294	0.122055	6.18724e-10	2.82472e-08	Npm3	All_Genes
ENSMUSG00000011254	441.417	0.758948	0.130391	6.54565e-10	2.98023e-08	Thg1l	All_Genes
ENSMUSG00000039230	3467.88	-0.539271	0.0913494	6.58742e-10	2.99112e-08	Tbcd	All_Genes
ENSMUSG00000058135	1246.79	-0.928489	0.161298	6.62274e-10	2.99903e-08	Gstm1	All_Genes
ENSMUSG00000015575	4613.81	-0.423058	0.0711182	7.23211e-10	3.26615e-08	Atp6v0e	All_Genes
ENSMUSG00000003344	2219.13	0.609858	0.103468	7.30982e-10	3.29237e-08	Btbd2	All_Genes
ENSMUSG00000048440	386.783	-0.972977	0.169419	7.35426e-10	3.3035e-08	Cyp4f16	All_Genes
ENSMUSG00000028344	195.221	-1.8963	0.335398	7.43567e-10	3.33114e-08	Invs	All_Genes
ENSMUSG00000056665	854.012	1.01676	0.177332	7.543e-10	3.37021e-08	Them6	All_Genes
ENSMUSG00000030217	1442.03	-0.700246	0.12062	7.60861e-10	3.39048e-08	Art4	All_Genes
ENSMUSG00000032187	35374.2	-0.733631	0.127013	7.8439e-10	3.48606e-08	Smarca4	All_Genes
ENSMUSG00000036356	1307.01	-1.00589	0.176031	8.24102e-10	3.65286e-08	Csgalnact1	All_Genes
ENSMUSG00000024132	1612.63	-0.510772	0.0868489	8.31629e-10	3.6765e-08	Eci1	All_Genes
ENSMUSG00000031490	3150.66	0.562171	0.0959165	8.4504e-10	3.72596e-08	Eif4ebp1	All_Genes
ENSMUSG00000028207	870.734	1.01905	0.178608	8.65935e-10	3.80807e-08	Asph	All_Genes
ENSMUSG00000045817	8482.13	0.581707	0.0998061	9.63569e-10	4.22633e-08	Zfp36l2	All_Genes
ENSMUSG00000023353	1499.81	0.629831	0.108766	1.03034e-09	4.5074e-08	Agap3	All_Genes
ENSMUSG00000028788	14604.5	0.346653	0.0583738	1.12654e-09	4.91541e-08	Ptp4a2	All_Genes
ENSMUSG00000024537	5573.64	0.519219	0.0886184	1.13513e-09	4.94002e-08	Psmg2	All_Genes
ENSMUSG00000041801	605.993	1.0111	0.179377	1.16794e-09	5.06965e-08	Phlda3	All_Genes
ENSMUSG00000031360	4484.58	-0.424665	0.0726202	1.1719e-09	5.0737e-08	Ctps2	All_Genes
ENSMUSG00000029304	264.337	-1.1376	0.201958	1.17658e-09	5.08082e-08	Spp1	All_Genes
ENSMUSG00000039109	1318.97	-1.19793	0.213341	1.18783e-09	5.11624e-08	F13a1	All_Genes
ENSMUSG00000004631	285.527	-1.24304	0.221921	1.31063e-09	5.60193e-08	Sgce	All_Genes
ENSMUSG00000024781	1613.4	-0.634386	0.110701	1.30884e-09	5.60193e-08	Lipa	All_Genes
ENSMUSG00000025014	90801.5	-0.521563	0.090013	1.33879e-09	5.70775e-08	Dntt	All_Genes
ENSMUSG00000036944	781.242	-1.01981	0.180887	1.35178e-09	5.7485e-08	Tmem71	All_Genes
ENSMUSG00000068417	981.207	0.817068	0.143998	1.41722e-09	6.01154e-08	Pnp2	All_Genes
ENSMUSG00000029338	502.28	-0.885937	0.156946	1.43278e-09	6.04689e-08	Antxr2	All_Genes
ENSMUSG00000039264	474.816	-1.17506	0.210293	1.43118e-09	6.04689e-08	Gimap3	All_Genes
ENSMUSG00000046402	295.895	-1.04038	0.185808	1.45686e-09	6.13309e-08	Rbp1	All_Genes
ENSMUSG00000040010	8004.17	0.668755	0.11722	1.5081e-09	6.33288e-08	Slc7a5	All_Genes
ENSMUSG00000015291	5174.86	-0.765495	0.135343	1.61562e-09	6.75692e-08	Gdi1	All_Genes
ENSMUSG00000058392	3849.61	0.637984	0.111235	1.61715e-09	6.75692e-08	Rrp1b	All_Genes
ENSMUSG00000029030	8762.59	-0.436572	0.0751085	1.64778e-09	6.8678e-08	Tprgl	All_Genes
ENSMUSG00000002699	355.769	-1.46019	0.263554	1.68246e-09	6.99494e-08	Lcp2	All_Genes
ENSMUSG00000022914	770.678	0.856668	0.152394	1.70959e-09	7.08976e-08	Brwd1	All_Genes
ENSMUSG00000038894	405.413	-0.994979	0.178764	1.71373e-09	7.08976e-08	Irs2	All_Genes
ENSMUSG00000096210	5195.2	-0.720673	0.127565	1.81007e-09	7.46987e-08	H1f0	All_Genes
ENSMUSG00000026000	2215.93	-0.490257	0.0863407	2.03034e-09	8.35832e-08	Lancl1	All_Genes
ENSMUSG00000097595	26.1916	-3.04537	0.557047	2.04338e-09	8.39139e-08	1500002F19Rik	All_Genes
ENSMUSG00000046329	330.502	1.06953	0.192691	2.12556e-09	8.70753e-08	Slc25a23	All_Genes
ENSMUSG00000037580	759.329	-0.624367	0.110458	2.26004e-09	9.23585e-08	Gch1	All_Genes
ENSMUSG00000015176	10028.2	0.567651	0.100062	2.38091e-09	9.68256e-08	Nolc1	All_Genes
ENSMUSG00000042055	2486.18	-0.603887	0.107092	2.38759e-09	9.6862e-08	Wdr11	All_Genes
ENSMUSG00000026525	266.313	0.920211	0.16578	2.42474e-09	9.81317e-08	Opn3	All_Genes
ENSMUSG00000042613	2022.01	-1.00322	0.181966	2.52481e-09	1.01936e-07	Pbxip1	All_Genes
ENSMUSG00000037300	3979.39	0.372538	0.0644716	2.67226e-09	1.07629e-07	Ttc13	All_Genes
ENSMUSG00000022353	926.513	-0.610596	0.108569	2.68817e-09	1.0801e-07	Mtss1	All_Genes
ENSMUSG00000057069	818.934	-0.856026	0.154187	2.89189e-09	1.15918e-07	Ero1lb	All_Genes
ENSMUSG00000041220	5828.54	0.513007	0.090172	2.99898e-09	1.19923e-07	Elovl6	All_Genes
ENSMUSG00000034353	7337.37	0.583029	0.103562	3.12948e-09	1.24844e-07	Ramp1	All_Genes
ENSMUSG00000048310	936.291	-0.50723	0.0896475	3.13804e-09	1.24888e-07	Pskh1	All_Genes
ENSMUSG00000006127	4295.59	-0.451983	0.0790716	3.16935e-09	1.25835e-07	Inpp5k	All_Genes
ENSMUSG00000020186	1002.24	-0.515496	0.0913546	3.1778e-09	1.25872e-07	Csrp2	All_Genes
ENSMUSG00000028459	3403	-0.681453	0.122688	3.27634e-09	1.2947e-07	Cd72	All_Genes
ENSMUSG00000030047	3265.32	-0.629086	0.112486	3.30635e-09	1.30348e-07	Arhgap25	All_Genes
ENSMUSG00000003484	951.3	-1.21633	0.223221	3.33596e-09	1.31207e-07	Cyp4f18	All_Genes
ENSMUSG00000021265	201.316	1.14786	0.210344	3.36234e-09	1.31934e-07	Slc25a29	All_Genes
ENSMUSG00000056214	1782.97	0.557232	0.0990111	3.55166e-09	1.39037e-07	Pard6g	All_Genes
ENSMUSG00000062646	403.913	-0.999111	0.182912	3.64011e-09	1.42168e-07	Ganc	All_Genes
ENSMUSG00000021493	800.016	0.644366	0.116247	3.85362e-09	1.50157e-07	Pdlim7	All_Genes
ENSMUSG00000030672	592.153	-0.717889	0.129875	3.91234e-09	1.52091e-07	Mylpf	All_Genes
ENSMUSG00000052914	311.885	-1.1429	0.210547	3.98388e-09	1.54514e-07	Cyp2j6	All_Genes
ENSMUSG00000049717	953.088	-0.727111	0.131826	4.00449e-09	1.54954e-07	Lig4	All_Genes
ENSMUSG00000021665	1173.78	-0.542808	0.0973061	4.33157e-09	1.67224e-07	Hexb	All_Genes
ENSMUSG00000002409	201.416	-1.4172	0.263618	4.35606e-09	1.67783e-07	Dyrk1b	All_Genes
ENSMUSG00000024403	154.653	1.39146	0.259026	4.37022e-09	1.67943e-07	Atp6v1g2	All_Genes
ENSMUSG00000073433	80.6433	1.82166	0.339255	4.38044e-09	1.6795e-07	Arhgdig	All_Genes
ENSMUSG00000020894	1524.46	0.529581	0.093809	4.40988e-09	1.68693e-07	Vamp2	All_Genes
ENSMUSG00000007656	7019.91	0.325708	0.0571583	4.45829e-09	1.6977e-07	Arpp19	All_Genes
ENSMUSG00000018442	2759	-0.35697	0.0627064	4.44828e-09	1.6977e-07	Derl2	All_Genes
ENSMUSG00000019960	5430	-0.565311	0.101859	4.72743e-09	1.7961e-07	Dusp6	All_Genes
ENSMUSG00000040723	17156.3	-0.450534	0.08025	5.10691e-09	1.93589e-07	Rcsd1	All_Genes
ENSMUSG00000020166	11536.5	-0.38447	0.0680537	5.12855e-09	1.9397e-07	Cnot2	All_Genes
ENSMUSG00000053965	230.419	-1.48747	0.279052	5.14823e-09	1.94276e-07	Pde5a	All_Genes
ENSMUSG00000031156	1062.14	-0.520066	0.0934055	5.17012e-09	1.94664e-07	Slc35a2	All_Genes
ENSMUSG00000020125	1545.93	-3.94895	0.763762	5.25939e-09	1.97581e-07	Elane	All_Genes
ENSMUSG00000089762	129.224	1.28372	0.239418	5.30798e-09	1.9896e-07	Ier5l	All_Genes
ENSMUSG00000028766	5573.49	-0.638964	0.11671	5.86598e-09	2.19385e-07	Alpl	All_Genes
ENSMUSG00000085417	825.753	-0.766241	0.141347	6.1941e-09	2.3114e-07	Gm13919	All_Genes
ENSMUSG00000020160	482.394	-0.78997	0.146503	6.83248e-09	2.54396e-07	Meis1	All_Genes
ENSMUSG00000022346	12726.5	0.59125	0.108485	6.8894e-09	2.55947e-07	Myc	All_Genes
ENSMUSG00000039682	5209.71	0.467402	0.0843165	7.12824e-09	2.64234e-07	Lap3	All_Genes
ENSMUSG00000056091	495.061	1.00408	0.188381	7.57126e-09	2.80036e-07	St3gal5	All_Genes
ENSMUSG00000000958	368.275	-1.16876	0.220822	7.82935e-09	2.88944e-07	Slc7a7	All_Genes
ENSMUSG00000057541	4556.29	0.547131	0.0999313	7.94585e-09	2.92599e-07	Pus7	All_Genes
ENSMUSG00000023118	3064.08	0.567919	0.103405	8.08594e-09	2.97105e-07	Sympk	All_Genes
ENSMUSG00000042719	2892.81	0.460281	0.0836352	8.43754e-09	3.09346e-07	Naa25	All_Genes
ENSMUSG00000025140	609.41	1.07383	0.202613	8.49764e-09	3.10869e-07	Pycr1	All_Genes
ENSMUSG00000024286	2027.19	0.54447	0.0997217	8.68695e-09	3.16413e-07	Ccny	All_Genes
ENSMUSG00000051007	1417.46	-0.469463	0.0853119	8.683e-09	3.16413e-07	Gatd1	All_Genes
ENSMUSG00000092274	136.589	-1.38794	0.264827	8.74019e-09	3.17661e-07	Neat1	All_Genes
ENSMUSG00000020053	61.5336	-2.38429	0.462112	8.82432e-09	3.1939e-07	Igf1	All_Genes
ENSMUSG00000060992	11687.2	-0.341205	0.0605792	8.82589e-09	3.1939e-07	Copz1	All_Genes
ENSMUSG00000048163	7858.59	-0.512712	0.0941525	9.51991e-09	3.43763e-07	Selplg	All_Genes
ENSMUSG00000028101	776.494	-0.86722	0.16411	9.82095e-09	3.53871e-07	Pias3	All_Genes
ENSMUSG00000029623	2420.75	0.491854	0.0896061	9.99542e-09	3.59288e-07	Pdap1	All_Genes
ENSMUSG00000038005	6199.59	-0.580935	0.107482	1.00142e-08	3.59288e-07	Hpf1	All_Genes
ENSMUSG00000028010	2786.22	0.389165	0.0702092	1.02439e-08	3.66743e-07	Gar1	All_Genes
ENSMUSG00000029153	133.203	1.46223	0.280944	1.04213e-08	3.723e-07	Ociad2	All_Genes
ENSMUSG00000086763	139.229	-1.61448	0.309986	1.04542e-08	3.72681e-07	Plxna4os1	All_Genes
ENSMUSG00000029802	1095.99	-0.55922	0.103259	1.05007e-08	3.73545e-07	Abcg2	All_Genes
ENSMUSG00000006369	129.442	1.95803	0.380723	1.1654e-08	4.13693e-07	Fbln1	All_Genes
ENSMUSG00000039826	1406.61	0.525316	0.0966209	1.16986e-08	4.14397e-07	Trub2	All_Genes
ENSMUSG00000021703	1496.79	-1.07914	0.206455	1.21926e-08	4.30987e-07	Serinc5	All_Genes
ENSMUSG00000073421	6740.95	0.558478	0.103959	1.29417e-08	4.56502e-07	H2-Ab1	All_Genes
ENSMUSG00000039531	1279.47	-0.531966	0.0987509	1.31994e-08	4.64612e-07	Zufsp	All_Genes
ENSMUSG00000050957	625.738	-0.784391	0.148616	1.32562e-08	4.65634e-07	Insl6	All_Genes
ENSMUSG00000042265	297.071	-0.926128	0.176966	1.3846e-08	4.85333e-07	Trem1	All_Genes
ENSMUSG00000022824	341.52	-1.10591	0.213137	1.4059e-08	4.91773e-07	Muc13	All_Genes
ENSMUSG00000032363	68.8206	-2.67352	0.522092	1.43359e-08	5.00411e-07	Adamts7	All_Genes
ENSMUSG00000048120	1439.9	-0.933211	0.177917	1.46811e-08	5.11396e-07	Entpd1	All_Genes
ENSMUSG00000026223	1461.81	-0.584121	0.109158	1.49518e-08	5.19747e-07	Itm2c	All_Genes
ENSMUSG00000042216	247.011	-1.31489	0.25646	1.54499e-08	5.35947e-07	Sgsm1	All_Genes
ENSMUSG00000009470	5866.38	0.512167	0.0945064	1.58303e-08	5.48011e-07	Tnpo1	All_Genes
ENSMUSG00000042684	492.39	1.03904	0.200911	1.68667e-08	5.82682e-07	Npl	All_Genes
ENSMUSG00000027187	19987	-0.473808	0.0880694	1.69349e-08	5.83836e-07	Cat	All_Genes
ENSMUSG00000005883	190.399	-1.76248	0.346295	1.7278e-08	5.9444e-07	Spo11	All_Genes
ENSMUSG00000038965	9233.25	0.266152	0.0481356	1.7445e-08	5.98957e-07	Ube2l3	All_Genes
ENSMUSG00000037907	213.882	1.34774	0.264303	1.75364e-08	6.00863e-07	Ankrd13b	All_Genes
ENSMUSG00000034926	690.66	0.605615	0.114201	1.78042e-08	6.08793e-07	Dhcr24	All_Genes
ENSMUSG00000027424	1551.9	0.365635	0.0670396	1.795e-08	6.12529e-07	Mgme1	All_Genes
ENSMUSG00000044037	183.427	-1.83765	0.367074	1.81664e-08	6.18654e-07	Als2cl	All_Genes
ENSMUSG00000031729	5078.84	-0.390688	0.0719337	1.82289e-08	6.19523e-07	Ist1	All_Genes
ENSMUSG00000095677	2160.6	-0.373333	0.0685723	1.82695e-08	6.19645e-07	Dynlt1f	All_Genes
ENSMUSG00000030064	279.289	1.935	0.381745	1.8572e-08	6.28633e-07	Frmd4b	All_Genes
ENSMUSG00000021149	6571.01	0.424585	0.0787189	1.92173e-08	6.49109e-07	Gtpbp4	All_Genes
ENSMUSG00000001138	1221.84	-0.670292	0.127876	1.97837e-08	6.64279e-07	Cnnm3	All_Genes
ENSMUSG00000026360	1978.72	-0.605779	0.114243	1.97614e-08	6.64279e-07	Rgs2	All_Genes
ENSMUSG00000024681	240.181	-4.23658	0.856552	1.98284e-08	6.6445e-07	Ms4a3	All_Genes
ENSMUSG00000009585	18062.2	-0.345685	0.0634882	1.99136e-08	6.65974e-07	Apobec3	All_Genes
ENSMUSG00000024457	2130.42	-0.394867	0.0730647	2.0028e-08	6.68463e-07	Trim26	All_Genes
ENSMUSG00000025492	2817.95	0.64773	0.123493	2.03311e-08	6.77232e-07	Ifitm3	All_Genes
ENSMUSG00000038370	770.95	-2.05581	0.407776	2.1449e-08	7.13052e-07	Pcp4l1	All_Genes
ENSMUSG00000031887	1641.6	-0.604604	0.115035	2.15525e-08	7.15072e-07	Tradd	All_Genes
ENSMUSG00000041168	6058.43	0.376406	0.0698131	2.17032e-08	7.18649e-07	Lonp1	All_Genes
ENSMUSG00000024665	2657.23	0.505076	0.0946335	2.19253e-08	7.24571e-07	Fads2	All_Genes
ENSMUSG00000030268	10712.4	0.497813	0.0936684	2.2493e-08	7.4187e-07	Bcat1	All_Genes
ENSMUSG00000022471	19919.1	-0.331736	0.0606829	2.28018e-08	7.50578e-07	Xrcc6	All_Genes
ENSMUSG00000021076	5053.42	-0.444158	0.0828731	2.31681e-08	7.6114e-07	Actr10	All_Genes
ENSMUSG00000027219	1701.2	-0.687448	0.132091	2.33365e-08	7.65171e-07	Slc28a2	All_Genes
ENSMUSG00000003848	3990.07	0.475958	0.0891025	2.39679e-08	7.84339e-07	Nob1	All_Genes
ENSMUSG00000001248	3519.9	-0.525352	0.0997978	2.46621e-08	8.03917e-07	Gramd1a	All_Genes
ENSMUSG00000021485	3568.88	-0.512078	0.0984144	2.46195e-08	8.03917e-07	Mxd3	All_Genes
ENSMUSG00000022607	776.067	0.768699	0.149252	2.50526e-08	8.13481e-07	Ptk2	All_Genes
ENSMUSG00000045273	2663.46	-0.627697	0.120116	2.50269e-08	8.13481e-07	Cenph	All_Genes
ENSMUSG00000001576	6628.48	0.423999	0.0805615	2.54336e-08	8.24255e-07	Ergic1	All_Genes
ENSMUSG00000041733	3296.24	0.508895	0.0958336	2.55173e-08	8.2537e-07	Coq5	All_Genes
ENSMUSG00000069910	2194.65	-0.369256	0.0687253	2.58472e-08	8.34432e-07	Spdl1	All_Genes
ENSMUSG00000029322	14796.9	0.531889	0.100974	2.63164e-08	8.47944e-07	Plac8	All_Genes
ENSMUSG00000003363	767.396	-0.676873	0.130531	2.65206e-08	8.52883e-07	Pld3	All_Genes
ENSMUSG00000025190	2311.04	0.521667	0.0989534	2.73093e-08	8.76566e-07	Got1	All_Genes
ENSMUSG00000010048	3144.58	0.648498	0.12511	2.90407e-08	9.30357e-07	Ifrd2	All_Genes
ENSMUSG00000042345	3888.37	0.484642	0.0937003	2.91352e-08	9.31604e-07	Ubash3a	All_Genes
ENSMUSG00000030104	4348.24	-0.339959	0.0630242	2.97819e-08	9.50469e-07	Edem1	All_Genes
ENSMUSG00000040158	637.393	-0.795979	0.156006	3.15106e-08	1.00182e-06	Tax1bp3	All_Genes
ENSMUSG00000005078	1112.62	-0.572097	0.110177	3.19302e-08	1.01324e-06	Jkamp	All_Genes
ENSMUSG00000025212	900.547	-0.637797	0.123503	3.26816e-08	1.03512e-06	Sfxn3	All_Genes
ENSMUSG00000020439	5818.25	-0.523386	0.100323	3.29297e-08	1.04101e-06	Smtn	All_Genes
ENSMUSG00000025209	1270.08	0.740089	0.144411	3.34295e-08	1.05426e-06	Twnk	All_Genes
ENSMUSG00000028173	3860.84	-0.493264	0.0940731	3.34745e-08	1.05426e-06	Wls	All_Genes
ENSMUSG00000044252	911.987	-0.657156	0.127236	3.39838e-08	1.06829e-06	Osbpl1a	All_Genes
ENSMUSG00000030189	16169.5	0.515321	0.0990356	3.42242e-08	1.07383e-06	Ybx3	All_Genes
ENSMUSG00000043008	20531.8	-0.509013	0.0975226	3.62689e-08	1.13374e-06	Klhl6	All_Genes
ENSMUSG00000026707	359.728	-0.863986	0.170772	3.70464e-08	1.15589e-06	Nsun6	All_Genes
ENSMUSG00000079363	384.359	-1.11852	0.223725	3.72717e-08	1.16076e-06	Gbp4	All_Genes
ENSMUSG00000032366	880.779	-0.632059	0.122895	3.79835e-08	1.17959e-06	Tpm1	All_Genes
ENSMUSG00000078713	5258.07	0.556447	0.107197	3.80172e-08	1.17959e-06	Tomm5	All_Genes
ENSMUSG00000020451	2423.8	-0.431456	0.0818699	3.86736e-08	1.19552e-06	Limk2	All_Genes
ENSMUSG00000026361	3331.12	-0.644809	0.125252	3.8774e-08	1.19552e-06	Cdc73	All_Genes
ENSMUSG00000029084	819.287	-1.06366	0.212505	3.88636e-08	1.19552e-06	Cd38	All_Genes
ENSMUSG00000039316	5478.93	-0.408999	0.0775231	3.88875e-08	1.19552e-06	Rftn1	All_Genes
ENSMUSG00000041119	262.347	-1.66427	0.338667	3.87646e-08	1.19552e-06	Pde9a	All_Genes
ENSMUSG00000035212	2380.01	-0.384268	0.072687	4.02826e-08	1.23614e-06	Leprot	All_Genes
ENSMUSG00000020869	18585	0.350174	0.0657228	4.05635e-08	1.24249e-06	Lrrc59	All_Genes
ENSMUSG00000057729	438.479	-3.54306	0.755786	4.16663e-08	1.27162e-06	Prtn3	All_Genes
ENSMUSG00000028121	587.59	0.920265	0.183931	4.1903e-08	1.27652e-06	Bcar3	All_Genes
ENSMUSG00000028692	20998.8	0.371888	0.0699095	4.20264e-08	1.27795e-06	Akr1a1	All_Genes
ENSMUSG00000039853	591.79	-0.706043	0.138428	4.27187e-08	1.29665e-06	Trim14	All_Genes
ENSMUSG00000009350	3741.07	-3.69781	0.794397	4.29447e-08	1.30115e-06	Mpo	All_Genes
ENSMUSG00000056498	788.856	-0.856624	0.170607	4.45563e-08	1.34755e-06	Tmem154	All_Genes
ENSMUSG00000023456	18328.4	0.458712	0.0868368	4.51363e-08	1.36263e-06	Tpi1	All_Genes
ENSMUSG00000097039	111.218	1.54982	0.317256	4.70332e-08	1.41734e-06	Pvt1	All_Genes
ENSMUSG00000027936	1337.32	-0.589765	0.115464	4.96368e-08	1.49311e-06	Crtc2	All_Genes
ENSMUSG00000044629	488.721	-0.746917	0.148266	5.00975e-08	1.50427e-06	Cnrip1	All_Genes
ENSMUSG00000020648	676.149	0.799812	0.159338	5.07537e-08	1.52125e-06	Dus4l	All_Genes
ENSMUSG00000037032	594.799	-1.09318	0.22129	5.16584e-08	1.54513e-06	Apbb1	All_Genes
ENSMUSG00000103653	990.718	0.590413	0.11562	5.17349e-08	1.54513e-06	Gstp-ps	All_Genes
ENSMUSG00000038121	1727.15	0.623405	0.121997	5.25049e-08	1.56534e-06	Fam210a	All_Genes
ENSMUSG00000033429	449.239	-0.762626	0.152021	5.51522e-08	1.64134e-06	Mcee	All_Genes
ENSMUSG00000032788	1024.57	0.624771	0.123288	5.64305e-08	1.67641e-06	Pdxk	All_Genes
ENSMUSG00000021830	2169.92	-0.570915	0.111916	5.65379e-08	1.67663e-06	Txndc16	All_Genes
ENSMUSG00000024810	125.597	-1.84596	0.380699	5.69388e-08	1.68553e-06	Il33	All_Genes
ENSMUSG00000031521	612.738	-0.816573	0.164667	5.82548e-08	1.71918e-06	Aga	All_Genes
ENSMUSG00000047221	944.524	0.813739	0.162899	5.82809e-08	1.71918e-06	Fam185a	All_Genes
ENSMUSG00000000078	1217.06	-0.656664	0.130193	5.91883e-08	1.74288e-06	Klf6	All_Genes
ENSMUSG00000020134	2935.36	-0.409441	0.0785799	6.07749e-08	1.78646e-06	Peli1	All_Genes
ENSMUSG00000008496	197.494	0.953383	0.193414	6.38211e-08	1.87272e-06	Pou2f2	All_Genes
ENSMUSG00000020402	11731.5	0.343038	0.0659334	6.53287e-08	1.9136e-06	Vdac1	All_Genes
ENSMUSG00000030649	340.642	-0.620848	0.123118	6.5856e-08	1.92568e-06	Anapc15	All_Genes
ENSMUSG00000026473	1728.6	-0.662901	0.131986	6.6042e-08	1.92776e-06	Glul	All_Genes
ENSMUSG00000040247	18272.6	-0.551461	0.108853	6.71128e-08	1.95561e-06	Tbc1d10c	All_Genes
ENSMUSG00000032589	548.301	0.85118	0.171846	6.74755e-08	1.96276e-06	Bsn	All_Genes
ENSMUSG00000034035	134.137	-1.21148	0.248737	6.78882e-08	1.97135e-06	Ccdc17	All_Genes
ENSMUSG00000033105	539.335	-0.74855	0.150361	6.84209e-08	1.98338e-06	Lss	All_Genes
ENSMUSG00000034274	2170.9	-0.454918	0.089169	7.23337e-08	2.09318e-06	Thoc5	All_Genes
ENSMUSG00000000290	2499.43	-0.506995	0.0998067	7.61764e-08	2.20058e-06	Itgb2	All_Genes
ENSMUSG00000042363	367.792	0.783723	0.158413	7.64203e-08	2.20382e-06	Lgalsl	All_Genes
ENSMUSG00000037216	131.671	1.11822	0.231214	7.67468e-08	2.20565e-06	Lipt1	All_Genes
ENSMUSG00000054452	6984.66	0.481751	0.0943098	7.66997e-08	2.20565e-06	Aes	All_Genes
ENSMUSG00000018287	3687.76	-0.360587	0.0692194	7.85717e-08	2.25123e-06	Spag7	All_Genes
ENSMUSG00000047735	1757.48	0.668675	0.134027	7.86017e-08	2.25123e-06	Samd9l	All_Genes
ENSMUSG00000022092	3316.61	-0.494371	0.0976375	8.03056e-08	2.29611e-06	Ppp3cc	All_Genes
ENSMUSG00000029552	2769.83	-0.447704	0.0874142	8.04817e-08	2.29722e-06	Tes	All_Genes
ENSMUSG00000024654	2980.97	-0.433483	0.0850543	8.08506e-08	2.30383e-06	Asrgl1	All_Genes
ENSMUSG00000020717	3308.89	-0.469438	0.0921986	8.16221e-08	2.32186e-06	Pecam1	All_Genes
ENSMUSG00000032412	56091.8	-0.397509	0.0773533	8.47459e-08	2.40664e-06	Atp1b3	All_Genes
ENSMUSG00000060950	1339.05	0.507162	0.100061	8.52141e-08	2.41584e-06	Trmt61a	All_Genes
ENSMUSG00000024527	4285.42	0.43223	0.084504	8.55754e-08	2.42199e-06	Afg3l2	All_Genes
ENSMUSG00000095079	328.274	-0.0244328	0.263703	8.63991e-08	2.44117e-06	Igha	All_Genes
ENSMUSG00000027430	2102.7	0.418017	0.0816978	8.81311e-08	2.48592e-06	Dtd1	All_Genes
ENSMUSG00000033255	134.733	-1.23201	0.255664	9.09764e-08	2.55902e-06	Gm5134	All_Genes
ENSMUSG00000041515	10505.6	0.334596	0.0645876	9.1028e-08	2.55902e-06	Irf8	All_Genes
ENSMUSG00000025499	2431.18	0.38764	0.0761865	9.177e-08	2.57125e-06	Hras	All_Genes
ENSMUSG00000052337	12651.7	0.359714	0.0693042	9.17008e-08	2.57125e-06	Immt	All_Genes
ENSMUSG00000040387	64.5238	-2.52193	0.532964	9.65887e-08	2.70174e-06	Klhl32	All_Genes
ENSMUSG00000025041	8771.31	0.379296	0.0732777	9.71789e-08	2.71372e-06	Nt5c2	All_Genes
ENSMUSG00000019849	26087.7	-0.402711	0.0780168	9.94499e-08	2.77252e-06	Prep	All_Genes
ENSMUSG00000079614	11583	0.384161	0.0751314	1.00366e-07	2.79341e-06	Seh1l	All_Genes
ENSMUSG00000057113	46438.3	0.545828	0.109153	1.00644e-07	2.7965e-06	Npm1	All_Genes
ENSMUSG00000040554	51.0031	-2.31634	0.494538	1.0537e-07	2.92297e-06	Aipl1	All_Genes
ENSMUSG00000032648	766.131	0.709508	0.144637	1.0569e-07	2.92701e-06	Pygm	All_Genes
ENSMUSG00000027395	4356.09	0.651491	0.131924	1.07048e-07	2.95972e-06	Polr1b	All_Genes
ENSMUSG00000017417	2277.76	-0.587801	0.118837	1.14766e-07	3.16788e-06	Plxdc1	All_Genes
ENSMUSG00000021595	18341	0.428674	0.0847556	1.15007e-07	3.16932e-06	Nsun2	All_Genes
ENSMUSG00000060791	13040.2	-0.39349	0.0790826	1.15284e-07	3.17173e-06	Gmfg	All_Genes
ENSMUSG00000010362	2228.82	-0.52657	0.105831	1.20101e-07	3.29883e-06	Rdm1	All_Genes
ENSMUSG00000045795	625.642	-0.657958	0.134264	1.20333e-07	3.29979e-06	Whamm	All_Genes
ENSMUSG00000000753	1460.23	-0.556087	0.112283	1.26698e-07	3.463e-06	Serpinf1	All_Genes
ENSMUSG00000032185	3264.23	0.498077	0.0998877	1.26693e-07	3.463e-06	Carm1	All_Genes
ENSMUSG00000025007	6135.37	0.403608	0.0798324	1.27934e-07	3.4911e-06	Aldh18a1	All_Genes
ENSMUSG00000000384	1811.76	0.702725	0.145507	1.32554e-07	3.61097e-06	Tbrg4	All_Genes
ENSMUSG00000028383	1970.89	-0.473595	0.0949163	1.32973e-07	3.61097e-06	Hsdl2	All_Genes
ENSMUSG00000028860	370.045	-1.11849	0.2361	1.329e-07	3.61097e-06	Sytl1	All_Genes
ENSMUSG00000003824	3256.04	0.425371	0.0845396	1.36001e-07	3.68721e-06	Syce2	All_Genes
ENSMUSG00000025324	1470.94	-0.997417	0.209182	1.3663e-07	3.69368e-06	Atp10a	All_Genes
ENSMUSG00000037260	899.801	0.717335	0.14774	1.36681e-07	3.69368e-06	Hgsnat	All_Genes
ENSMUSG00000038225	430.697	-0.694379	0.142994	1.42386e-07	3.84168e-06	Primpol	All_Genes
ENSMUSG00000021585	3230.48	-0.54516	0.110496	1.43658e-07	3.86975e-06	Cast	All_Genes
ENSMUSG00000026576	3984.64	-0.584889	0.119275	1.44339e-07	3.88185e-06	Atp1b1	All_Genes
ENSMUSG00000034424	5033.39	0.528373	0.10733	1.49176e-07	4.00553e-06	Gcsh	All_Genes
ENSMUSG00000024866	624.311	-0.784789	0.163299	1.50127e-07	4.0246e-06	Acy3	All_Genes
ENSMUSG00000059336	584.204	-0.780635	0.162865	1.56317e-07	4.18386e-06	Slc14a1	All_Genes
ENSMUSG00000003031	350.584	-0.865358	0.181356	1.60933e-07	4.30054e-06	Cdkn1b	All_Genes
ENSMUSG00000029016	660.257	0.923127	0.194042	1.64839e-07	4.3979e-06	Clcn6	All_Genes
ENSMUSG00000020654	409.86	0.780299	0.163291	1.7688e-07	4.71166e-06	Adcy3	All_Genes
ENSMUSG00000029468	191.634	-0.918181	0.193734	1.78006e-07	4.73412e-06	P2rx7	All_Genes
ENSMUSG00000030714	1478.58	-0.427699	0.0858211	1.78369e-07	4.73625e-06	Sgf29	All_Genes
ENSMUSG00000035891	4644.01	-0.674197	0.140076	1.78888e-07	4.74253e-06	Cerk	All_Genes
ENSMUSG00000101223	83.5627	-1.10821	0.236107	1.82626e-07	4.83395e-06	4930568A12Rik	All_Genes
ENSMUSG00000045751	3831.85	-0.51724	0.105785	1.8464e-07	4.87957e-06	Mms22l	All_Genes
ENSMUSG00000039599	1204.31	-0.507842	0.103683	1.93362e-07	5.10203e-06	Fam149b	All_Genes
ENSMUSG00000086205	23.216	2.40563	0.521684	1.94346e-07	5.11993e-06	Gm12679	All_Genes
ENSMUSG00000032127	2672.97	-0.443686	0.0895953	1.95296e-07	5.13687e-06	Vps11	All_Genes
ENSMUSG00000020882	1149.09	0.717782	0.150074	1.95839e-07	5.14308e-06	Cacnb1	All_Genes
ENSMUSG00000085156	1322.79	0.579309	0.11946	2.00523e-07	5.24963e-06	Snhg15	All_Genes
ENSMUSG00000016194	265.564	-1.22284	0.264549	2.03664e-07	5.32353e-06	Hsd11b1	All_Genes
ENSMUSG00000031782	1746.26	0.375205	0.0751881	2.10366e-07	5.49016e-06	Coq9	All_Genes
ENSMUSG00000027303	4527.68	-0.288542	0.0571156	2.10726e-07	5.491e-06	Ptpra	All_Genes
ENSMUSG00000029319	3171.8	0.472015	0.0962508	2.11411e-07	5.50031e-06	Coq2	All_Genes
ENSMUSG00000068735	14309.1	-0.460816	0.0938288	2.20789e-07	5.73538e-06	Trp53i11	All_Genes
ENSMUSG00000026853	1010.93	0.455499	0.0930888	2.26947e-07	5.88623e-06	Crat	All_Genes
ENSMUSG00000096472	6382.01	-0.552276	0.114209	2.29311e-07	5.93835e-06	Cdkn2d	All_Genes
ENSMUSG00000029064	14705	-0.36648	0.0736368	2.37947e-07	6.15247e-06	Gnb1	All_Genes
ENSMUSG00000033488	301.702	-1.03524	0.223229	2.39361e-07	6.17049e-06	Cryzl2	All_Genes
ENSMUSG00000057606	1996.9	-0.638224	0.133583	2.3938e-07	6.17049e-06	Colq	All_Genes
ENSMUSG00000026090	568.223	-1.23493	0.268859	2.48152e-07	6.38677e-06	2010300C02Rik	All_Genes
ENSMUSG00000037628	3163.67	-0.482991	0.0992187	2.51093e-07	6.45254e-06	Cdkn3	All_Genes
ENSMUSG00000056144	593.462	-0.690122	0.145419	2.5212e-07	6.46903e-06	Trim34a	All_Genes
ENSMUSG00000032657	1326.62	-0.566423	0.117559	2.53178e-07	6.48623e-06	Fam189b	All_Genes
ENSMUSG00000026672	225.553	-1.24878	0.271748	2.55948e-07	6.54719e-06	Optn	All_Genes
ENSMUSG00000050705	1024.29	0.414033	0.0842389	2.56744e-07	6.55754e-06	2310061I04Rik	All_Genes
ENSMUSG00000002055	7870.05	-0.315886	0.0640469	2.57565e-07	6.5685e-06	Spag5	All_Genes
ENSMUSG00000028460	1566.03	-0.741179	0.157365	2.5825e-07	6.57597e-06	Sit1	All_Genes
ENSMUSG00000052459	3685.95	-0.488479	0.100407	2.61013e-07	6.63623e-06	Atp6v1a	All_Genes
ENSMUSG00000024712	6792.95	-0.420613	0.0858474	2.65653e-07	6.74396e-06	Rfk	All_Genes
ENSMUSG00000023572	1740.59	-0.49224	0.101611	2.7138e-07	6.87892e-06	Ccndbp1	All_Genes
ENSMUSG00000026946	2449.86	-0.412176	0.0840296	2.72017e-07	6.88467e-06	Nmi	All_Genes
ENSMUSG00000021608	2847.31	-0.521139	0.108544	2.73863e-07	6.92092e-06	Lpcat1	All_Genes
ENSMUSG00000024220	975.542	0.64867	0.13649	2.76646e-07	6.98073e-06	Zfp523	All_Genes
ENSMUSG00000040430	809.548	0.791266	0.168917	2.77418e-07	6.98969e-06	Pitpnc1	All_Genes
ENSMUSG00000111713	66.561	1.18481	0.259947	2.79264e-07	7.02564e-06	Gm20234	All_Genes
ENSMUSG00000046598	1581.89	0.693859	0.146979	2.80402e-07	7.04368e-06	Bdh1	All_Genes
ENSMUSG00000044700	2069.6	0.520538	0.108192	2.87411e-07	7.19815e-06	Tmem201	All_Genes
ENSMUSG00000024589	1725.05	-0.489325	0.101299	2.92141e-07	7.30571e-06	Nedd4l	All_Genes
ENSMUSG00000021185	1282.48	0.642035	0.135153	3.05306e-07	7.62354e-06	Dglucy	All_Genes
ENSMUSG00000043439	229.326	0.768858	0.164955	3.09523e-07	7.71735e-06	Epop	All_Genes
ENSMUSG00000024359	33032.4	0.437124	0.0901151	3.11464e-07	7.7542e-06	Hspa9	All_Genes
ENSMUSG00000025732	508.94	0.797696	0.171422	3.12311e-07	7.76376e-06	Mcrip2	All_Genes
ENSMUSG00000067586	181.283	1.27389	0.280066	3.16685e-07	7.86082e-06	S1pr3	All_Genes
ENSMUSG00000038175	827.046	-0.668461	0.142219	3.23431e-07	8.0164e-06	Mylip	All_Genes
ENSMUSG00000026405	51.3709	1.86803	0.423584	3.25036e-07	8.04428e-06	C4bp	All_Genes
ENSMUSG00000004032	143.887	0.828874	0.178668	3.26071e-07	8.05798e-06	Gstm5	All_Genes
ENSMUSG00000020918	5234.78	0.425021	0.087598	3.31372e-07	8.17692e-06	Kat2a	All_Genes
ENSMUSG00000032959	13666.7	0.37979	0.077643	3.3273e-07	8.19722e-06	Pebp1	All_Genes
ENSMUSG00000037683	132.375	-1.00024	0.218393	3.33173e-07	8.19722e-06	Armc3	All_Genes
ENSMUSG00000045362	814.113	-0.778214	0.167519	3.36243e-07	8.26062e-06	Tnfrsf26	All_Genes
ENSMUSG00000039158	4983.03	-0.646663	0.138957	3.41341e-07	8.3736e-06	Akna	All_Genes
ENSMUSG00000041890	8128.36	-0.35875	0.0729166	3.45688e-07	8.46783e-06	Git2	All_Genes
ENSMUSG00000061288	2589.18	-0.495947	0.103593	3.47167e-07	8.49166e-06	Taok3	All_Genes
ENSMUSG00000013698	558.911	-0.524495	0.110018	3.53676e-07	8.63826e-06	Pea15a	All_Genes
ENSMUSG00000019082	1727.57	0.355964	0.0726915	3.59252e-07	8.75523e-06	Slc25a22	All_Genes
ENSMUSG00000031840	285.077	-0.78773	0.170134	3.59511e-07	8.75523e-06	Rab3a	All_Genes
ENSMUSG00000024664	1208.95	0.701825	0.152126	3.6117e-07	8.78288e-06	Fads3	All_Genes
ENSMUSG00000015837	8696.75	-0.403998	0.0834111	3.63854e-07	8.83533e-06	Sqstm1	All_Genes
ENSMUSG00000026187	1684.6	-0.498069	0.104068	3.68703e-07	8.93426e-06	Xrcc5	All_Genes
ENSMUSG00000062309	34.4369	1.74257	0.388864	3.68995e-07	8.93426e-06	Rpp25	All_Genes
ENSMUSG00000038046	1413.64	0.431103	0.0893211	3.70219e-07	8.95096e-06	Mrm3	All_Genes
ENSMUSG00000044949	169.884	0.95231	0.208267	3.75638e-07	9.0689e-06	Ubtd2	All_Genes
ENSMUSG00000091337	1557.91	0.788305	0.170689	3.84664e-07	9.27344e-06	Eid1	All_Genes
ENSMUSG00000002083	87.5769	1.4901	0.33205	3.87605e-07	9.33092e-06	Bbc3	All_Genes
ENSMUSG00000033307	20265.4	0.561684	0.119721	3.97889e-07	9.55844e-06	Mif	All_Genes
ENSMUSG00000047881	937.186	-0.537671	0.113583	3.98197e-07	9.55844e-06	Rell1	All_Genes
ENSMUSG00000043964	1696.8	0.329104	0.0671206	4.01644e-07	9.62739e-06	Orai3	All_Genes
ENSMUSG00000036606	2210.69	0.727659	0.157356	4.08212e-07	9.77084e-06	Plxnb2	All_Genes
ENSMUSG00000056413	977.243	0.985099	0.215716	4.1042e-07	9.80969e-06	Adap1	All_Genes
ENSMUSG00000008384	332.638	-0.869866	0.190657	4.21139e-07	1.00516e-05	Sertad1	All_Genes
ENSMUSG00000002308	1362.19	0.554613	0.117982	4.42497e-07	1.05385e-05	Cd320	All_Genes
ENSMUSG00000036781	8030.19	0.457659	0.0946319	4.428e-07	1.05385e-05	Rps27l	All_Genes
ENSMUSG00000027469	16633.7	-0.199841	0.0403029	4.47447e-07	1.0634e-05	Tpx2	All_Genes
ENSMUSG00000019977	5724.24	0.379435	0.0784802	4.5161e-07	1.07177e-05	Hbs1l	All_Genes
ENSMUSG00000001100	4555.26	0.392564	0.0814779	4.53554e-07	1.07486e-05	Poldip2	All_Genes
ENSMUSG00000035983	48.4799	1.5261	0.343371	4.60812e-07	1.09052e-05	Gm7008	All_Genes
ENSMUSG00000030924	737.171	-0.70734	0.153649	4.63664e-07	1.09572e-05	Rexo5	All_Genes
ENSMUSG00000035711	3151.4	-0.700421	0.154424	4.71847e-07	1.11292e-05	Dok3	All_Genes
ENSMUSG00000060441	322.563	-1.01663	0.225641	4.72267e-07	1.11292e-05	Trim5	All_Genes
ENSMUSG00000016495	1763	-0.416115	0.0877325	4.8505e-07	1.14143e-05	Plgrkt	All_Genes
ENSMUSG00000031672	9579.63	0.344411	0.0710056	4.87843e-07	1.1464e-05	Got2	All_Genes
ENSMUSG00000059555	2511.89	-0.416482	0.0871713	4.9099e-07	1.15218e-05	Tor4a	All_Genes
ENSMUSG00000031982	619.896	0.575855	0.12331	4.97216e-07	1.16369e-05	Arv1	All_Genes
ENSMUSG00000035206	1646.12	0.440998	0.0937744	4.97286e-07	1.16369e-05	Sppl2b	All_Genes
ENSMUSG00000001741	9354.99	-0.290972	0.0588551	4.99415e-07	1.16704e-05	Il16	All_Genes
ENSMUSG00000024055	247.243	-1.01063	0.224905	5.03361e-07	1.17462e-05	Cyp4f13	All_Genes
ENSMUSG00000026974	3582.58	0.410639	0.0857489	5.08308e-07	1.18338e-05	Zmynd19	All_Genes
ENSMUSG00000031562	1173.68	0.618462	0.133125	5.08524e-07	1.18338e-05	Dctd	All_Genes
ENSMUSG00000067377	3809.86	-0.590955	0.128038	5.10895e-07	1.18725e-05	Tspan6	All_Genes
ENSMUSG00000028690	1945.63	0.420914	0.088121	5.16692e-07	1.19905e-05	Mmachc	All_Genes
ENSMUSG00000038503	3282.42	-0.399933	0.0835267	5.19733e-07	1.20444e-05	Mesd	All_Genes
ENSMUSG00000029536	1794.72	0.389451	0.0812064	5.25581e-07	1.21631e-05	Gatc	All_Genes
ENSMUSG00000114277	953.249	-0.55387	0.118897	5.33124e-07	1.23207e-05	Gm48583	All_Genes
ENSMUSG00000042354	10988.2	0.56476	0.120803	5.45667e-07	1.25932e-05	Gnl3	All_Genes
ENSMUSG00000054967	159.286	0.914781	0.203272	5.50667e-07	1.26911e-05	Zfp647	All_Genes
ENSMUSG00000021238	431.215	-1.03496	0.231632	5.56049e-07	1.278e-05	Aldh6a1	All_Genes
ENSMUSG00000040462	4280.03	-0.335231	0.0692681	5.55714e-07	1.278e-05	Os9	All_Genes
ENSMUSG00000006356	762.989	-0.700208	0.153189	5.58512e-07	1.2819e-05	Crip2	All_Genes
ENSMUSG00000020430	6460.33	0.333851	0.0691574	5.59995e-07	1.28354e-05	Pes1	All_Genes
ENSMUSG00000031766	679.519	-1.13038	0.257039	5.63643e-07	1.29014e-05	Slc12a3	All_Genes
ENSMUSG00000062661	726.842	0.883666	0.196564	5.67688e-07	1.29763e-05	Ncs1	All_Genes
ENSMUSG00000069662	5846.08	-0.576695	0.124513	5.71798e-07	1.30524e-05	Marcks	All_Genes
ENSMUSG00000008318	1118.3	0.376096	0.0786234	5.81283e-07	1.32509e-05	Relt	All_Genes
ENSMUSG00000031167	13734.4	-0.410629	0.0856641	5.82803e-07	1.32675e-05	Rbm3	All_Genes
ENSMUSG00000039787	557.957	0.698728	0.153062	5.88363e-07	1.33759e-05	Cercam	All_Genes
ENSMUSG00000039768	5450.91	0.404631	0.0854477	5.92107e-07	1.34427e-05	Dnajc11	All_Genes
ENSMUSG00000032782	1407.22	-0.531691	0.114579	6.02013e-07	1.36491e-05	Cntrob	All_Genes
ENSMUSG00000021951	366.211	0.661752	0.144484	6.03696e-07	1.36688e-05	Eef1akmt1	All_Genes
ENSMUSG00000024725	6459.13	-0.363854	0.0761537	6.32588e-07	1.43037e-05	Ostf1	All_Genes
ENSMUSG00000038482	28053	0.36168	0.075395	6.4114e-07	1.44775e-05	Tfdp1	All_Genes
ENSMUSG00000027985	11996.6	-0.519734	0.112169	6.46095e-07	1.45698e-05	Lef1	All_Genes
ENSMUSG00000006301	1004.93	0.519031	0.111743	6.48559e-07	1.46057e-05	Tmbim1	All_Genes
ENSMUSG00000021697	3849.43	-0.434696	0.0920163	6.63831e-07	1.49295e-05	Depdc1b	All_Genes
ENSMUSG00000026748	181.166	-1.99917	0.468276	6.92328e-07	1.55495e-05	Plxdc2	All_Genes
ENSMUSG00000039963	184.817	1.23815	0.284065	6.94063e-07	1.55676e-05	Ccdc40	All_Genes
ENSMUSG00000030741	1563.84	0.414139	0.0879286	7.2879e-07	1.63029e-05	Spns1	All_Genes
ENSMUSG00000030786	88.5343	-2.03022	0.47284	7.28113e-07	1.63029e-05	Itgam	All_Genes
ENSMUSG00000024006	4724.52	-0.286964	0.0596083	7.3263e-07	1.6367e-05	Stk38	All_Genes
ENSMUSG00000019139	4190.2	0.489939	0.106265	7.42098e-07	1.65564e-05	Isyna1	All_Genes
ENSMUSG00000037991	1890.57	0.552611	0.119616	7.4415e-07	1.65801e-05	Rmi2	All_Genes
ENSMUSG00000033713	2589.98	-0.531869	0.115403	7.60264e-07	1.69166e-05	Foxn3	All_Genes
ENSMUSG00000002763	2000.8	-0.475029	0.101771	7.67477e-07	1.70545e-05	Pex6	All_Genes
ENSMUSG00000028573	194.957	-1.10487	0.253311	8.03719e-07	1.78362e-05	Fggy	All_Genes
ENSMUSG00000085936	909.751	-0.648284	0.144106	8.11804e-07	1.79918e-05	2610307P16Rik	All_Genes
ENSMUSG00000073982	3914.63	-0.383368	0.0814897	8.2559e-07	1.82731e-05	Rhog	All_Genes
ENSMUSG00000022139	1825.35	-0.50609	0.109585	8.55415e-07	1.88585e-05	Mbnl2	All_Genes
ENSMUSG00000033294	7237.7	0.469028	0.100977	8.53555e-07	1.88585e-05	Noc4l	All_Genes
ENSMUSG00000022962	13804	0.381352	0.0811713	8.70428e-07	1.91588e-05	Gart	All_Genes
ENSMUSG00000040314	572.608	-3.26519	0.801541	8.71322e-07	1.91588e-05	Ctsg	All_Genes
ENSMUSG00000040669	1053.58	-0.596566	0.131684	8.75571e-07	1.9227e-05	Phc1	All_Genes
ENSMUSG00000022369	1874.88	-0.523578	0.114385	8.77941e-07	1.92538e-05	Mtbp	All_Genes
ENSMUSG00000023963	188.217	-1.10398	0.253745	8.79946e-07	1.92725e-05	Cyp39a1	All_Genes
ENSMUSG00000025810	150.215	1.94503	0.457935	8.90531e-07	1.94789e-05	Nrp1	All_Genes
ENSMUSG00000046034	3084.87	-0.481864	0.1044	9.09529e-07	1.98427e-05	Otulin	All_Genes
ENSMUSG00000049916	3133.35	-0.446094	0.0963679	9.09488e-07	1.98427e-05	2610318N02Rik	All_Genes
ENSMUSG00000031431	5098.13	-0.689617	0.154794	9.23709e-07	2.01258e-05	Tsc22d3	All_Genes
ENSMUSG00000020268	460.465	0.538211	0.118111	9.33996e-07	2.03235e-05	Lyrm7	All_Genes
ENSMUSG00000021699	711.469	-0.457795	0.099182	9.39119e-07	2.04085e-05	Pde4d	All_Genes
ENSMUSG00000074698	2002.46	0.44784	0.0971158	9.52597e-07	2.06746e-05	Csnk2a1	All_Genes
ENSMUSG00000024197	3641.73	-0.514643	0.112871	9.64855e-07	2.09135e-05	Plin3	All_Genes
ENSMUSG00000018428	1679.65	0.515073	0.112958	9.90421e-07	2.13855e-05	Akap1	All_Genes
ENSMUSG00000019189	4580.48	-0.392038	0.0841501	9.90461e-07	2.13855e-05	Rnf145	All_Genes
ENSMUSG00000053398	36268.4	0.437266	0.0945674	9.89853e-07	2.13855e-05	Phgdh	All_Genes
ENSMUSG00000003873	1729.19	0.431831	0.0933674	1.00323e-06	2.16333e-05	Bax	All_Genes
ENSMUSG00000044345	104.769	1.20887	0.280432	1.0219e-06	2.20076e-05	Marveld1	All_Genes
ENSMUSG00000029922	3132.56	-0.328237	0.0697552	1.03102e-06	2.21756e-05	Mkrn1	All_Genes
ENSMUSG00000052676	677.717	0.691799	0.155461	1.03858e-06	2.23094e-05	Zmat1	All_Genes
ENSMUSG00000097769	712.906	0.560107	0.124014	1.042e-06	2.23543e-05	Snhg4	All_Genes
ENSMUSG00000025403	17498	0.538479	0.119046	1.05308e-06	2.2563e-05	Shmt2	All_Genes
ENSMUSG00000057098	17500.9	-0.546158	0.122591	1.05917e-06	2.26646e-05	Ebf1	All_Genes
ENSMUSG00000028426	3648.05	0.481884	0.105656	1.06613e-06	2.27845e-05	Rad23b	All_Genes
ENSMUSG00000079427	537.715	-0.667805	0.149987	1.07666e-06	2.29802e-05	Mthfsl	All_Genes
ENSMUSG00000022108	26849.4	-0.372772	0.0815449	1.08756e-06	2.31833e-05	Itm2b	All_Genes
ENSMUSG00000020741	4368.21	0.792324	0.180374	1.09207e-06	2.32498e-05	Cluh	All_Genes
ENSMUSG00000025962	3564.55	0.519002	0.114443	1.10103e-06	2.34108e-05	Fastkd2	All_Genes
ENSMUSG00000026972	3984.78	-0.364496	0.0786331	1.10513e-06	2.34682e-05	Arrdc1	All_Genes
ENSMUSG00000031960	9877.57	0.334249	0.0711094	1.11246e-06	2.3594e-05	Aars	All_Genes
ENSMUSG00000087452	34.1127	1.80495	0.427441	1.17909e-06	2.49755e-05	Gm11998	All_Genes
ENSMUSG00000029012	1508.51	-0.446728	0.0977566	1.21317e-06	2.5665e-05	Orc5	All_Genes
ENSMUSG00000099875	686.953	-0.482773	0.106049	1.21739e-06	2.57218e-05	Rbm3-ps	All_Genes
ENSMUSG00000029571	1975.5	-0.64834	0.146468	1.23425e-06	2.60452e-05	Tmem106b	All_Genes
ENSMUSG00000004748	623.12	0.661661	0.150118	1.29947e-06	2.73869e-05	Mtfp1	All_Genes
ENSMUSG00000034875	4554.45	0.460371	0.101437	1.34135e-06	2.8234e-05	Nudt19	All_Genes
ENSMUSG00000000561	3532.2	0.478136	0.105888	1.36051e-06	2.86014e-05	Wdr77	All_Genes
ENSMUSG00000029233	846.661	-0.514378	0.11451	1.37924e-06	2.89589e-05	Srd5a3	All_Genes
ENSMUSG00000025364	13094.1	0.477388	0.103938	1.39253e-06	2.92013e-05	Pa2g4	All_Genes
[truncated: 10,626 more rows]

## Sheet: Fig4b_P1P2dKOvs_P1sKO
Row.names	baseMean	log2FoldChange	lfcSE	pvalue	padj	GeneName	cc_Phase
ENSMUSG00000025747	12754.4	-0.781533	0.0768538	2.86301e-25	1.5312e-22	Tyms	S
ENSMUSG00000001436	5119.1	0.679687	0.102292	3.75263e-12	3.49041e-10	Slc19a1	S
ENSMUSG00000021485	3568.88	-0.637741	0.0985421	1.2293e-11	1.01147e-09	Mxd3	S
ENSMUSG00000047242	652.978	-0.810487	0.148404	4.26662e-09	1.79979e-07	Taf9b	S
ENSMUSG00000041238	4059.72	-0.355706	0.0624813	4.57712e-09	1.90056e-07	Rbbp8	S
ENSMUSG00000002319	920.653	0.73525	0.134435	4.76615e-09	1.96923e-07	Ipo4	S
ENSMUSG00000029863	6514.46	-0.582999	0.108682	1.14136e-08	4.19949e-07	Casp2	S
ENSMUSG00000021572	2468.77	-0.468783	0.0871393	1.61459e-08	5.59687e-07	Cep72	S
ENSMUSG00000007739	25643	0.447811	0.0874467	4.24014e-08	1.27759e-06	Cct4	S
ENSMUSG00000022177	5985.79	-0.408202	0.0816447	1.56256e-07	3.91948e-06	Haus4	S
ENSMUSG00000026245	10776.5	0.398249	0.0814388	2.89124e-07	6.72302e-06	Farsb	S
ENSMUSG00000027424	1551.9	0.329676	0.0670222	3.2678e-07	7.47103e-06	Mgme1	S
ENSMUSG00000025364	13094.1	0.497791	0.10435	3.40806e-07	7.74442e-06	Pa2g4	S
ENSMUSG00000042462	3938.37	0.549322	0.11861	5.8736e-07	1.22163e-05	Dctpp1	S
ENSMUSG00000022234	43830.5	0.433966	0.092711	6.52606e-07	1.33508e-05	Cct5	S
ENSMUSG00000017561	13404.5	-0.293428	0.0620498	9.9981e-07	1.9294e-05	Crlf3	S
ENSMUSG00000001416	36013	0.374158	0.0806148	1.0189e-06	1.96118e-05	Cct3	S
ENSMUSG00000025436	939.897	0.58423	0.134202	1.89403e-06	3.36853e-05	Atp23	S
ENSMUSG00000007050	4466.54	0.329547	0.0724149	1.9988e-06	3.50902e-05	Lsm2	S
ENSMUSG00000050410	6824.43	-0.50184	0.115483	2.5511e-06	4.32158e-05	Tcf19	S
ENSMUSG00000062510	3192.23	-0.305597	0.0674787	2.73769e-06	4.59093e-05	Nsl1	S
ENSMUSG00000052369	1828.48	-0.445765	0.103841	3.82053e-06	6.08605e-05	Tmem106c	S
ENSMUSG00000020185	1762.85	-0.522447	0.126102	5.57949e-06	8.43969e-05	E2f7	S
ENSMUSG00000001151	1622.71	-0.557616	0.140188	9.87344e-06	0.000136523	Pcnt	S
ENSMUSG00000032782	1407.22	-0.456622	0.1145	1.36185e-05	0.000179838	Cntrob	S
ENSMUSG00000052926	4162.97	0.306648	0.0752353	1.95745e-05	0.000244682	Rnaseh2a	S
ENSMUSG00000028693	10493.8	0.307889	0.0764006	2.10119e-05	0.000259063	Nasp	S
ENSMUSG00000030322	1952.9	-0.420145	0.108021	2.38666e-05	0.00028707	Mbd4	S
ENSMUSG00000034024	15079.2	0.305349	0.0774777	2.56279e-05	0.000305556	Cct2	S
ENSMUSG00000029430	74956	0.351776	0.0908451	3.64242e-05	0.000414163	Ran	S
ENSMUSG00000005732	13617.6	0.380749	0.101512	5.39171e-05	0.000578373	Ranbp1	S
ENSMUSG00000026036	1848.5	0.557852	0.161737	7.86817e-05	0.000793974	Nif3l1	S
ENSMUSG00000026709	5557.54	0.298971	0.0818088	9.38425e-05	0.000925752	Dars2	S
ENSMUSG00000037443	6829.06	-0.31881	0.0875848	9.89624e-05	0.000967338	Cep85	S
ENSMUSG00000027641	8560.35	-0.4887	0.142306	0.000103077	0.00100103	Rbl1	S
ENSMUSG00000021048	11713.4	0.414571	0.11783	0.00010557	0.00101995	Mthfd1	S
ENSMUSG00000028453	2097.48	-0.29862	0.0852968	0.000107699	0.00103583	Fancg	S
ENSMUSG00000045751	3831.85	-0.373163	0.105009	0.000110929	0.00106212	Mms22l	S
ENSMUSG00000040312	1252.75	-0.499333	0.146659	0.000113593	0.00108072	Cchcr1	S
ENSMUSG00000022471	19919.1	-0.224057	0.0602686	0.000124294	0.00116404	Xrcc6	S
ENSMUSG00000024800	4039.67	0.321684	0.0895238	0.000126692	0.00118133	Rpp30	S
ENSMUSG00000008690	16075.4	-0.286607	0.0795107	0.000140943	0.00128933	Ncaph2	S
ENSMUSG00000035024	8993.42	-0.386904	0.112544	0.000157094	0.00141715	Ncapd3	S
ENSMUSG00000029366	30225.9	-0.383325	0.113611	0.000200751	0.00175292	Dck	S
ENSMUSG00000044783	14068.6	-0.36012	0.10915	0.000282081	0.00231969	Hjurp	S
ENSMUSG00000039748	5025.66	0.296033	0.086051	0.000282545	0.00232224	Exo1	S
ENSMUSG00000055612	31669.4	0.267504	0.0780362	0.000295131	0.00240326	Cdca7	S
ENSMUSG00000027454	3025.81	0.292051	0.0868917	0.000330164	0.00264113	Gins1	S
ENSMUSG00000005698	14653.1	-0.153212	0.0441784	0.000375741	0.00292601	Ctcf	S
ENSMUSG00000028333	30629.5	0.273569	0.0817961	0.000387203	0.00300123	Anp32b	S
ENSMUSG00000022369	1874.88	-0.355179	0.113498	0.000542601	0.00396766	Mtbp	S
ENSMUSG00000028896	11393.4	0.215465	0.0657218	0.000637856	0.00451413	Rcc1	S
ENSMUSG00000031971	943.451	-0.375254	0.124396	0.00069606	0.00484588	Ccsap	S
ENSMUSG00000039509	7015.77	0.180087	0.0546985	0.000757832	0.00520098	Nup133	S
ENSMUSG00000040034	2795.94	0.344324	0.115109	0.00087586	0.00591077	Nup43	S
ENSMUSG00000031575	7782.51	0.164468	0.0511024	0.000980379	0.00646178	Ash2l	S
ENSMUSG00000027845	921.826	-0.361768	0.123839	0.00100363	0.00658605	Dclre1b	S
ENSMUSG00000043015	1122.69	-0.376764	0.13139	0.00110175	0.00711153	Nemp2	S
ENSMUSG00000027203	12305.8	0.221788	0.0716959	0.00114806	0.00734873	Dut	S
ENSMUSG00000038482	28053	0.229182	0.0744568	0.00117646	0.00750002	Tfdp1	S
ENSMUSG00000006728	34569.9	0.281576	0.0938085	0.00119011	0.0075533	Cdk4	S
ENSMUSG00000029247	35281.1	0.335384	0.116427	0.0012272	0.00773779	Paics	S
ENSMUSG00000042208	2561.35	0.385737	0.135525	0.00124375	0.00782901	0610010F05Rik	S
ENSMUSG00000027353	2621.47	0.277343	0.0929516	0.00127421	0.00797716	Mcm8	S
ENSMUSG00000043872	1253.78	0.326203	0.116731	0.00176922	0.0104595	Zmym1	S
ENSMUSG00000019373	8292.06	0.287636	0.100408	0.00178078	0.0105155	Cops3	S
ENSMUSG00000005470	26836.6	-0.322918	0.1158	0.00184119	0.0107921	Asf1b	S
ENSMUSG00000054309	9463.36	0.213997	0.0735299	0.0020922	0.011972	Cpsf3	S
ENSMUSG00000002718	22224.7	0.278125	0.098742	0.0021446	0.0122297	Cse1l	S
ENSMUSG00000078773	2134.52	-0.201107	0.0693648	0.00238029	0.0133236	Rad54b	S
ENSMUSG00000039396	7209.23	-0.292686	0.106129	0.00238525	0.013338	Neil3	S
ENSMUSG00000052798	11292.1	0.190253	0.0659426	0.00250158	0.0138642	Nup107	S
ENSMUSG00000003868	11248.1	0.315999	0.11807	0.00253185	0.0140027	Ruvbl2	S
ENSMUSG00000036181	384.868	-0.42403	0.16979	0.00254428	0.0140541	Hist1h1c	S
ENSMUSG00000048170	11443.6	0.174299	0.0605828	0.00276149	0.0150266	Mcmbp	S
ENSMUSG00000068114	1756.94	-0.285989	0.105219	0.0027813	0.0151125	Ccdc134	S
ENSMUSG00000038010	1202.83	-0.381451	0.151515	0.00292268	0.015721	Ccdc138	S
ENSMUSG00000004880	45083.2	-0.244796	0.0881465	0.00325709	0.0171381	Lbr	S
ENSMUSG00000022881	9582.9	0.268682	0.100566	0.00349966	0.0181884	Rfc4	S
ENSMUSG00000023942	9207.02	0.245122	0.0883004	0.00399314	0.0203461	Slc29a1	S
ENSMUSG00000020527	285.135	-0.528941	0.254405	0.00433692	0.0217924	Myo19	S
ENSMUSG00000061286	3021.77	0.247205	0.0940761	0.00440988	0.0220863	Exosc5	S
ENSMUSG00000078521	1539.51	0.366536	0.154067	0.00459911	0.0228354	Aunip	S
ENSMUSG00000046179	3428.87	-0.233873	0.0909673	0.00470743	0.0232499	E2f8	S
ENSMUSG00000034303	658.875	0.321318	0.131736	0.0049789	0.0242863	Ccdc15	S
ENSMUSG00000019773	12386.1	-0.227032	0.0884619	0.00517515	0.0249662	Fbxo5	S
ENSMUSG00000025742	9600.59	0.279115	0.113153	0.00554941	0.0263792	Prps2	S
ENSMUSG00000020974	2041.85	0.27468	0.110448	0.00570568	0.0269705	Pole2	S
ENSMUSG00000027722	2718.2	0.244055	0.0971524	0.00571772	0.0270103	Spata5	S
ENSMUSG00000032264	5092.1	-0.207557	0.0798719	0.00602621	0.0282538	Zw10	S
ENSMUSG00000055660	1687.92	0.259752	0.104366	0.00607878	0.0284646	Mettl4	S
ENSMUSG00000006763	1804.82	-0.282723	0.117721	0.00615675	0.0287398	Saal1	S
ENSMUSG00000009575	6626.69	0.220626	0.0868675	0.00641568	0.0296986	Cbx5	S
ENSMUSG00000037103	1844.02	-0.267654	0.113129	0.00790993	0.034962	Dcaf15	S
ENSMUSG00000026496	38479.2	0.16921	0.0688492	0.0087607	0.0378405	Parp1	S
ENSMUSG00000034329	4142.27	-0.257045	0.109839	0.0090235	0.0387628	Brip1	S
ENSMUSG00000028587	1332.8	0.251817	0.107466	0.00920885	0.039367	Orc1	S
ENSMUSG00000022142	4040.08	0.295861	0.133197	0.00995337	0.0416845	Nup155	S
ENSMUSG00000028438	933.486	-0.324285	0.153335	0.0107413	0.0442261	Kif24	S
ENSMUSG00000018189	11319.4	0.239211	0.101618	0.0109819	0.0450064	Uchl5	S
ENSMUSG00000026187	1684.6	0.233941	0.101662	0.0115572	0.046915	Xrcc5	S
ENSMUSG00000025646	1327.64	0.232547	0.101091	0.011613	0.0470522	Atrip	S
ENSMUSG00000033405	419.959	0.358433	0.181246	0.0120496	0.0484281	Nudt15	S
ENSMUSG00000024151	11742.6	0.171951	0.0726957	0.0127471	0.0505796	Msh2	S
ENSMUSG00000020794	7905.54	0.269488	0.125058	0.0133055	0.0523654	Ube2g1	S
ENSMUSG00000020358	17446.9	0.163221	0.0693381	0.0133596	0.0525506	Hnrnpab	S
ENSMUSG00000037474	12394.6	0.249188	0.114497	0.014495	0.0561174	Dtl	S
ENSMUSG00000026037	3384.23	0.195532	0.0862394	0.0146089	0.0564418	Orc2	S
ENSMUSG00000029191	8165.64	0.172503	0.0747086	0.014733	0.056848	Rfc1	S
ENSMUSG00000007570	905.77	0.23957	0.109573	0.0148128	0.057097	Fance	S
ENSMUSG00000038628	6514.66	0.240562	0.111989	0.0149966	0.0577014	Polr3k	S
ENSMUSG00000042590	6532.9	0.267759	0.128227	0.0155689	0.0594453	Ipo11	S
ENSMUSG00000029790	1455.11	-0.183625	0.0823132	0.0170845	0.0640564	Cep41	S
ENSMUSG00000021377	19767	-0.234986	0.113327	0.0188728	0.0692809	Dek	S
ENSMUSG00000062822	2263.1	-0.211919	0.099487	0.0196396	0.0714189	4833420G17Rik	S
ENSMUSG00000024258	3972.22	0.204312	0.0971838	0.0216664	0.0772327	Polr2d	S
ENSMUSG00000043091	10718.3	-0.149095	0.0679889	0.0219562	0.0780058	Tuba1c	S
ENSMUSG00000027811	4050.17	-0.216422	0.104656	0.0220814	0.0783379	4930579G24Rik	S
ENSMUSG00000026669	5729.67	0.135518	0.0617085	0.0224543	0.0792115	Mcm10	S
ENSMUSG00000023909	157.401	-0.377852	0.247308	0.0235553	0.0823392	Paqr4	S
ENSMUSG00000033364	2482.93	-0.214432	0.105417	0.0253105	0.087032	Usp37	S
ENSMUSG00000044678	98.2316	0.435814	0.414801	0.0255103	0.0874579	Ly6k	S
ENSMUSG00000024833	9943	0.165377	0.0823045	0.0270246	0.0912912	Pola2	S
ENSMUSG00000020649	75909.6	-0.213942	0.104154	0.0270779	0.0914505	Rrm2	S
ENSMUSG00000056919	733.406	-0.236133	0.122652	0.0273596	0.0920904	Cep162	S
ENSMUSG00000022945	9471.44	0.213685	0.110016	0.0307286	0.100297	Chaf1b	S
ENSMUSG00000030662	11936.6	0.231721	0.125024	0.0315409	0.102301	Ipo5	S
ENSMUSG00000027823	11363.7	0.178903	0.0889811	0.0326131	0.104923	Gmps	S
ENSMUSG00000039048	3694.06	0.135485	0.0659374	0.0329674	0.105715	Foxred1	S
ENSMUSG00000007646	1155	-0.170102	0.0858968	0.0335338	0.107164	Rad51c	S
ENSMUSG00000041491	2845.52	0.162073	0.0815936	0.0346028	0.10969	Cep78	S
ENSMUSG00000062075	6946.6	-0.156002	0.0784224	0.034985	0.110663	Lmnb2	S
ENSMUSG00000035726	5655.26	0.201056	0.105772	0.0351421	0.111071	Supt16	S
ENSMUSG00000006585	5693.22	0.211438	0.114916	0.0357002	0.112399	Cdt1	S
ENSMUSG00000060639	410.849	0.215507	0.120638	0.0404635	0.124442	Hist1h4i	S
ENSMUSG00000031629	489.962	-0.236701	0.138046	0.0419241	0.127694	Cenpu	S
ENSMUSG00000027323	10911.9	0.179928	0.0969341	0.0420771	0.128018	Rad51	S
ENSMUSG00000027285	2850.17	0.18595	0.102163	0.0450149	0.134739	Haus2	S
ENSMUSG00000027018	14128.1	0.197112	0.109727	0.047216	0.139514	Hat1	S
ENSMUSG00000021175	5817.5	0.157351	0.0841206	0.0477367	0.140617	Cdca7l	S
ENSMUSG00000017550	2792.47	-0.167663	0.0923725	0.0492367	0.144008	Atad5	S
ENSMUSG00000056394	19989.1	-0.141095	0.0763548	0.0512924	0.148397	Lig1	S
ENSMUSG00000021537	6608.21	0.182216	0.102525	0.0514415	0.148685	Cetn3	S
ENSMUSG00000024817	5553.34	-0.17908	0.102823	0.0542747	0.154694	Uhrf2	S
ENSMUSG00000000568	26049.3	0.153777	0.0778293	0.0576663	0.161653	Hnrnpd	S
ENSMUSG00000045273	2663.46	-0.188941	0.113379	0.0596892	0.16562	Cenph	S
ENSMUSG00000069306	41.9229	-0.301926	0.297449	0.0620994	0.170194	Hist1h4m	S
ENSMUSG00000047246	261.662	-0.268301	0.20377	0.0622722	0.170548	Hist1h2be	S
ENSMUSG00000043065	1307.83	-0.180904	0.109039	0.0626809	0.171442	Spice1	S
ENSMUSG00000061607	522.65	-0.269254	0.209289	0.0648241	0.175745	Mdc1	S
ENSMUSG00000029676	3737.48	-0.132114	0.0759127	0.0688448	0.183672	Pot1a	S
ENSMUSG00000029687	17036.5	-0.133837	0.0775533	0.0695644	0.184933	Ezh2	S
ENSMUSG00000032113	4022.94	0.174617	0.108078	0.0711175	0.187927	Chek1	S
ENSMUSG00000028282	3961.31	0.188993	0.120911	0.0732114	0.19197	Casp8ap2	S
ENSMUSG00000037461	8184.26	0.165956	0.102303	0.0736287	0.192779	Ints7	S
ENSMUSG00000021707	5206.86	0.159965	0.098702	0.0743304	0.19419	Dhfr	S
ENSMUSG00000040195	1114.06	-0.252563	0.196726	0.0745785	0.194725	Nemp1	S
ENSMUSG00000049539	371.995	0.245929	0.188656	0.0757506	0.196858	Hist1h1a	S
ENSMUSG00000026355	63934.1	0.113419	0.0680747	0.0783185	0.201377	Mcm6	S
ENSMUSG00000028884	15291.2	0.163493	0.103086	0.0784097	0.201508	Rpa2	S
ENSMUSG00000032939	12603.2	0.12489	0.0752351	0.0808368	0.206013	Nup93	S
ENSMUSG00000027490	2996.47	-0.127087	0.0773599	0.0824557	0.209106	E2f1	S
ENSMUSG00000021929	9260.18	0.214764	0.155765	0.0828771	0.209875	Kpna3	S
ENSMUSG00000026662	9255.65	-0.104605	0.0635505	0.0831498	0.210261	Sephs1	S
ENSMUSG00000029003	1852.5	0.13957	0.0867421	0.0855296	0.214325	Mad2l2	S
ENSMUSG00000071078	45.0527	0.265037	0.268983	0.0857561	0.214605	Nr2c2ap	S
ENSMUSG00000040044	7733.58	0.132496	0.083682	0.0864225	0.21584	Orc3	S
ENSMUSG00000019214	4106.41	-0.133715	0.0844914	0.0870731	0.216834	Chtf18	S
ENSMUSG00000039231	7091.31	0.0960308	0.059526	0.09719	0.234206	Suv39h1	S
ENSMUSG00000046591	1546.85	-0.188005	0.1379	0.106292	0.249057	Ticrr	S
ENSMUSG00000015749	34964.4	-0.104279	0.0721787	0.106983	0.250205	Anp32e	S
ENSMUSG00000027959	1200.11	0.181789	0.133199	0.107883	0.251722	Sass6	S
ENSMUSG00000031691	1097.07	-0.192041	0.146051	0.109429	0.254298	Tnpo2	S
ENSMUSG00000023066	851.749	-0.223616	0.198671	0.109776	0.254794	Rttn	S
ENSMUSG00000046111	971.515	-0.185533	0.142507	0.115273	0.263907	Cep295	S
ENSMUSG00000032249	1863.66	0.211126	0.175245	0.116329	0.26528	Anp32a	S
ENSMUSG00000030254	5529.57	0.11605	0.0781154	0.117523	0.266774	Rad18	S
ENSMUSG00000027650	2870.49	-0.141822	0.102234	0.120466	0.271521	Tti1	S
ENSMUSG00000099517	54.0885	-0.213892	0.283231	0.120993	0.272462	Hist1h3g	S
ENSMUSG00000035842	2364.1	-0.128822	0.0891159	0.121441	0.273264	Ddx11	S
ENSMUSG00000006715	8675.4	0.131733	0.0918955	0.122465	0.274868	Gmnn	S
ENSMUSG00000033596	9199.51	-0.193425	0.157283	0.12309	0.275732	Rfwd3	S
ENSMUSG00000022863	798.907	0.154401	0.114232	0.126458	0.281008	Btg3	S
ENSMUSG00000039994	5046.56	0.10286	0.0714064	0.132843	0.290411	Timeless	S
ENSMUSG00000020899	1628.27	0.148623	0.111536	0.134223	0.29283	Pfas	S
ENSMUSG00000001525	67884.2	0.107103	0.0751905	0.134885	0.293889	Tubb5	S
ENSMUSG00000048799	2146	-0.177243	0.144036	0.135037	0.29405	Cep120	S
ENSMUSG00000027067	37726.3	0.0859759	0.059249	0.135218	0.294272	Ssrp1	S
ENSMUSG00000029730	41325.9	0.101315	0.0715612	0.138243	0.298858	Mcm7	S
ENSMUSG00000032397	18844.1	0.153895	0.116342	0.138587	0.299234	Tipin	S
ENSMUSG00000026646	1055.07	0.148852	0.113991	0.1397	0.300619	Suv39h2	S
ENSMUSG00000069308	33.7906	0.191572	0.278481	0.140817	0.30224	Hist1h2bp	S
ENSMUSG00000025066	8848.53	0.12408	0.0933232	0.141119	0.302716	Sfr1	S
ENSMUSG00000020471	10629.5	0.145472	0.105079	0.143602	0.306724	Pold2	S
ENSMUSG00000025872	6170.49	0.117896	0.0870858	0.144717	0.307904	Thoc3	S
ENSMUSG00000022960	2441.35	-0.151133	0.113168	0.146561	0.310243	Donson	S
ENSMUSG00000057406	8948.79	-0.135578	0.10781	0.146963	0.310888	Nsd2	S
ENSMUSG00000035439	2572.51	-0.139828	0.108556	0.151577	0.317774	Haus8	S
ENSMUSG00000004099	28911.2	-0.122241	0.101119	0.154088	0.32075	Dnmt1	S
ENSMUSG00000028484	11898.4	0.1274	0.0973278	0.154189	0.320787	Psip1	S
ENSMUSG00000033762	934.271	0.14762	0.118531	0.154137	0.320787	Recql4	S
ENSMUSG00000047757	1512.36	0.165096	0.140535	0.157291	0.325201	Fancb	S
ENSMUSG00000001228	40932.2	-0.110421	0.0842043	0.160984	0.330599	Uhrf1	S
ENSMUSG00000020739	13581.4	0.115417	0.0918918	0.163897	0.334335	Nup85	S
ENSMUSG00000005566	20570.6	0.120198	0.0937595	0.164421	0.334949	Trim28	S
ENSMUSG00000068394	1206.12	-0.173505	0.168511	0.174182	0.348077	Cep152	S
ENSMUSG00000026999	2996.63	0.137402	0.114857	0.174293	0.34819	Nup35	S
ENSMUSG00000034021	6051.85	-0.164236	0.134164	0.17811	0.353646	Pds5b	S
ENSMUSG00000041298	622.584	0.151194	0.137767	0.187167	0.365309	Katnal1	S
ENSMUSG00000026429	3075.24	-0.124567	0.106081	0.190029	0.369233	Ube2t	S
ENSMUSG00000038544	6729.5	0.0620353	0.0501701	0.205575	0.389978	Inip	S
ENSMUSG00000000759	3649.26	-0.119859	0.105102	0.206722	0.391459	Tubgcp3	S
ENSMUSG00000022422	2178.69	-0.121481	0.111957	0.208977	0.394533	Dscc1	S
ENSMUSG00000041147	1800.79	0.115011	0.101741	0.213456	0.399714	Brca2	S
ENSMUSG00000020171	2824.31	0.0986792	0.0852225	0.216751	0.40438	Yeats4	S
ENSMUSG00000024974	13180.5	-0.0812288	0.0672674	0.218541	0.406793	Smc3	S
ENSMUSG00000025358	10200.9	-0.0941424	0.08043	0.219171	0.407561	Cdk2	S
ENSMUSG00000019988	3688.92	-0.117702	0.100032	0.221647	0.410737	Nedd1	S
ENSMUSG00000015478	951.089	-0.10405	0.0960502	0.232497	0.423609	Rnf5	S
ENSMUSG00000029363	11264.3	0.0937823	0.082047	0.235843	0.427987	Rfc5	S
ENSMUSG00000021714	4633.82	0.144933	0.153092	0.238496	0.431234	Cenpk	S
ENSMUSG00000030393	923.084	-0.136689	0.143446	0.2434	0.437408	Zik1	S
ENSMUSG00000018666	6115.74	-0.0831867	0.0770671	0.247797	0.442653	Cbx1	S
ENSMUSG00000022034	9955.6	-0.11245	0.107955	0.250267	0.446055	Esco2	S
ENSMUSG00000002748	5656.53	-0.120208	0.118898	0.253063	0.449061	Baz1b	S
ENSMUSG00000026374	8441.09	0.0700253	0.0626781	0.253238	0.449265	Tsn	S
ENSMUSG00000026134	5927.25	-0.100508	0.0930089	0.253669	0.449607	Prim2	S
ENSMUSG00000028033	318.36	-0.145429	0.175159	0.255994	0.452279	Kcnq5	S
ENSMUSG00000058773	3443.47	0.14255	0.165447	0.257742	0.454435	Hist1h1b	S
ENSMUSG00000078762	377.636	-0.124355	0.129007	0.257692	0.454435	Haus5	S
ENSMUSG00000037608	10755.3	0.0978914	0.0939937	0.259139	0.456006	Bclaf1	S
ENSMUSG00000038644	26203.5	-0.0869688	0.0836267	0.259381	0.456218	Pold1	S
ENSMUSG00000035455	15151.7	0.091651	0.0797343	0.263869	0.461402	Fignl1	S
ENSMUSG00000019303	2008.74	0.0918711	0.0935051	0.269102	0.467308	Psmc3ip	S
ENSMUSG00000021597	2492.87	0.121671	0.131217	0.27425	0.472714	Slf1	S
ENSMUSG00000034883	1761.8	0.122437	0.135029	0.280767	0.480293	Lrr1	S
ENSMUSG00000019952	2601.02	-0.103298	0.102844	0.282615	0.48214	Poc1b	S
ENSMUSG00000028688	604.759	0.0961706	0.0984253	0.284276	0.483973	Toe1	S
ENSMUSG00000031546	4593.36	0.0930075	0.0933622	0.284738	0.484595	Gins4	S
ENSMUSG00000040331	18201.3	0.0995477	0.0954516	0.287465	0.48795	Nsmce4a	S
ENSMUSG00000040599	3942.2	-0.0884323	0.0896861	0.290764	0.491498	Mis12	S
ENSMUSG00000059791	6020.88	-0.0741058	0.0800109	0.293671	0.494071	Nrm	S
ENSMUSG00000026196	636.976	0.117767	0.136529	0.297035	0.497298	Bard1	S
ENSMUSG00000034206	619.934	-0.13379	0.180116	0.297084	0.497298	Polq	S
ENSMUSG00000054099	638.19	-0.134766	0.184458	0.298296	0.498826	Slc25a40	S
ENSMUSG00000041406	3461.41	0.0787667	0.0850429	0.322123	0.524285	BC055324	S
ENSMUSG00000017861	8476.72	0.0696966	0.0722091	0.325856	0.528006	Mybl2	S
ENSMUSG00000074909	1122.21	-0.0890945	0.101136	0.330671	0.533297	Ranbp6	S
ENSMUSG00000033904	1969.17	-0.112985	0.140893	0.34355	0.546012	Ccp110	S
ENSMUSG00000042699	3014.68	0.101861	0.134879	0.349237	0.551205	Dhx9	S
ENSMUSG00000038047	3059.13	0.0880203	0.101303	0.350794	0.552419	Haus6	S
ENSMUSG00000020697	2032.96	0.0999763	0.128923	0.363698	0.565212	Lig3	S
ENSMUSG00000021461	1138.06	0.0716712	0.0855426	0.372088	0.5729	Fancc	S
ENSMUSG00000042079	43323.5	0.0765455	0.0935281	0.375814	0.576496	Hnrnpf	S
ENSMUSG00000031821	3399.1	0.0852209	0.10852	0.377522	0.577558	Gins2	S
ENSMUSG00000002835	6310.51	0.0581513	0.0699334	0.382153	0.581559	Chaf1a	S
ENSMUSG00000062727	43.5573	-0.10963	0.207584	0.383821	0.583288	Hist1h2bk	S
ENSMUSG00000031016	6905.78	0.0656819	0.0776486	0.389234	0.58829	Wee1	S
ENSMUSG00000002870	35087.1	0.0526679	0.0654001	0.389737	0.588695	Mcm2	S
ENSMUSG00000012483	4465.71	0.0825262	0.115355	0.415234	0.613955	Rpa3	S
ENSMUSG00000041346	1772.68	-0.0800262	0.109787	0.415658	0.614313	Wrap53	S
ENSMUSG00000000751	20724.2	-0.0566106	0.075422	0.419058	0.617536	Rpa1	S
ENSMUSG00000025862	11059.7	-0.0980459	0.150955	0.431361	0.628246	Stag2	S
ENSMUSG00000055884	849.898	0.087632	0.136883	0.446209	0.641758	Fancm	S
ENSMUSG00000042029	8888.31	-0.0934048	0.160675	0.446945	0.642446	Ncapg2	S
ENSMUSG00000031577	1189.29	0.0596876	0.0822463	0.447507	0.642699	Tti2	S
ENSMUSG00000025395	10294	-0.0649741	0.0978927	0.448218	0.643164	Prim1	S
ENSMUSG00000021177	5224.73	-0.0529854	0.0723709	0.452311	0.646437	Tdp1	S
ENSMUSG00000039055	1687.99	-0.0618959	0.0891323	0.460344	0.652993	Eme1	S
ENSMUSG00000021671	1812.66	-0.048538	0.0718024	0.474808	0.664945	Poc5	S
ENSMUSG00000025001	9354.77	0.0738496	0.118812	0.482901	0.671732	Hells	S
ENSMUSG00000028629	1690.96	0.0633745	0.100514	0.485247	0.67378	Exo5	S
ENSMUSG00000032498	3551.8	0.0572372	0.0889731	0.488357	0.676642	Mlh1	S
ENSMUSG00000034773	1515.5	0.0569717	0.0896356	0.494241	0.682244	BC030867	S
ENSMUSG00000069274	14.0431	-0.0612847	0.231781	0.501762	0.688527	Hist1h4f	S
ENSMUSG00000032477	4120.05	0.0494986	0.0779042	0.505376	0.691919	Cdc25a	S
ENSMUSG00000030528	3142.58	0.0708185	0.114167	0.512564	0.697342	Blm	S
ENSMUSG00000074780	24.7299	-0.0693909	0.21734	0.528501	0.711811	Anapc15-ps	S
ENSMUSG00000073542	2070.42	0.0612643	0.114057	0.531115	0.713249	Cep76	S
ENSMUSG00000024590	27369.1	-0.0649098	0.122175	0.538131	0.718658	Lmnb1	S
ENSMUSG00000035367	1625.5	-0.0583787	0.108936	0.54827	0.727803	Rmi1	S
ENSMUSG00000016757	2742.83	0.0528417	0.0958845	0.550975	0.730041	Ttll12	S
ENSMUSG00000047832	10091.1	-0.0486921	0.0881862	0.553924	0.732451	Cdca4	S
ENSMUSG00000024742	59.1624	-0.0704005	0.202657	0.555512	0.733839	Fen1	S
ENSMUSG00000024691	12163.4	0.0408542	0.0811148	0.562591	0.738758	Fam111a	S
ENSMUSG00000038759	8145.44	0.070564	0.155969	0.566202	0.741355	Nup205	S
ENSMUSG00000028702	5517.61	-0.0429284	0.0927701	0.567984	0.742766	Rad54l	S
ENSMUSG00000002068	4364.73	-0.04489	0.0852088	0.57651	0.749478	Ccne1	S
ENSMUSG00000014074	2760.21	0.0591662	0.123297	0.581764	0.75355	Rnf168	S
ENSMUSG00000000028	8516.81	0.0373938	0.0747497	0.587277	0.757551	Cdc45	S
ENSMUSG00000059119	16761.9	-0.0319711	0.0611842	0.588079	0.757954	Nap1l4	S
ENSMUSG00000027342	43767.2	0.0462403	0.0977718	0.606871	0.772189	Pcna	S
ENSMUSG00000075031	50.2732	-0.0610793	0.189557	0.619978	0.781233	Hist1h2bb	S
ENSMUSG00000025574	7970.97	0.0424202	0.0921822	0.624451	0.784229	Tk1	S
ENSMUSG00000004018	1415.33	-0.0424206	0.0955543	0.625451	0.78507	Fancl	S
ENSMUSG00000036875	4843.17	-0.0342408	0.0743275	0.637121	0.793618	Dna2	S
ENSMUSG00000005410	40025.7	-0.0340012	0.0751996	0.641804	0.796801	Mcm5	S
ENSMUSG00000031922	5994.86	-0.0440555	0.106715	0.64507	0.799079	Cep57	S
ENSMUSG00000041712	5389.04	-0.0361695	0.0847935	0.649949	0.80222	Ubr7	S
ENSMUSG00000005370	10758.9	0.0418702	0.10668	0.668902	0.814044	Msh6	S
ENSMUSG00000044934	3875.17	-0.0450882	0.121219	0.670034	0.814891	Zfp367	S
ENSMUSG00000006678	6602.59	-0.0484113	0.134566	0.67167	0.816052	Pola1	S
ENSMUSG00000024791	7725.2	-0.0304137	0.0783382	0.673098	0.816794	Cdca5	S
ENSMUSG00000020392	10537	-0.0292326	0.080193	0.679696	0.821307	Cdkn2aipnl	S
ENSMUSG00000031527	11645	0.0347696	0.0970747	0.699054	0.833865	Eri1	S
ENSMUSG00000029283	4111.48	-0.0389487	0.104383	0.70196	0.835866	Cdc7	S
ENSMUSG00000024054	5474.21	-0.0403484	0.146377	0.723266	0.849636	Smchd1	S
ENSMUSG00000040520	901.235	-0.0388063	0.169022	0.740324	0.860407	Manea	S
ENSMUSG00000026960	3591.68	0.0384183	0.148232	0.741351	0.861	Arl6ip6	S
ENSMUSG00000038126	1122.53	-0.0346124	0.128021	0.742128	0.861568	Mphosph9	S
ENSMUSG00000020652	2876.6	-0.0226699	0.0751321	0.746409	0.864328	Cenpo	S
ENSMUSG00000051329	6719.47	0.0353726	0.137574	0.751907	0.868411	Nup160	S
ENSMUSG00000029466	3859.82	-0.0247097	0.0799258	0.759432	0.873262	Anapc7	S
ENSMUSG00000075470	369.439	0.0349789	0.162401	0.774459	0.883087	Alg10b	S
ENSMUSG00000027242	715.003	0.0298179	0.123327	0.778545	0.885725	Wdr76	S
ENSMUSG00000015165	14531.6	0.0180404	0.0791559	0.782924	0.88795	Hnrnpl	S
ENSMUSG00000037572	5657.26	-0.0263557	0.12468	0.795664	0.89513	Wdhd1	S
ENSMUSG00000004642	34758.9	-0.0260511	0.116227	0.797249	0.896042	Slbp	S
ENSMUSG00000007080	4822.82	-0.0324564	0.128211	0.798026	0.896361	Pole	S
ENSMUSG00000028018	361.549	-0.0297694	0.148509	0.798422	0.896683	Gstcd	S
ENSMUSG00000017499	9541.95	-0.0186079	0.0790219	0.80283	0.899128	Cdc6	S
ENSMUSG00000031669	2286.46	-0.0243225	0.112359	0.804012	0.899453	Gins3	S
ENSMUSG00000032555	8487.69	-0.0233798	0.110088	0.832799	0.916324	Topbp1	S
ENSMUSG00000028560	16030.1	-0.013775	0.0814868	0.84141	0.921361	Usp1	S
ENSMUSG00000031697	6073.87	0.0135358	0.0842479	0.849701	0.926345	Orc6	S
ENSMUSG00000028212	8410.6	-0.0222715	0.134282	0.851727	0.927338	Ccne2	S
ENSMUSG00000052565	538.536	-0.0213576	0.153232	0.855715	0.929466	Hist1h1d	S
ENSMUSG00000032586	3672.69	0.00992729	0.0624394	0.865089	0.934009	Traip	S
ENSMUSG00000028933	1079.41	0.0191814	0.1375	0.867484	0.935319	Xrcc2	S
ENSMUSG00000016619	5353.72	0.00632224	0.0706998	0.873445	0.938565	Nup50	S
ENSMUSG00000030978	58912.3	0.0205115	0.0849019	0.880251	0.941032	Rrm1	S
ENSMUSG00000037846	1016.49	0.0143968	0.100728	0.881257	0.941158	Rtkn2	S
ENSMUSG00000022673	29813.5	0.0140144	0.0781338	0.892192	0.946469	Mcm4	S
ENSMUSG00000017146	3134.68	-0.0116316	0.123254	0.898733	0.94912	Brca1	S
ENSMUSG00000030726	8274.89	0.00652104	0.0591826	0.90027	0.949869	Pold3	S
ENSMUSG00000051220	5852.59	-0.00784267	0.0788967	0.908945	0.954118	Ercc6l	S
ENSMUSG00000023953	1276.19	-0.012041	0.122641	0.912377	0.95568	Polh	S
ENSMUSG00000042489	1725.89	0.0121838	0.108522	0.912556	0.955698	Clspn	S
ENSMUSG00000052533	3343.75	0.011243	0.118555	0.914333	0.956626	Nup188	S
ENSMUSG00000018809	1371.13	-0.00863103	0.0885675	0.91726	0.957838	Smyd4	S
ENSMUSG00000050107	3516.61	0.00866727	0.0770022	0.922107	0.960328	Haspin	S
ENSMUSG00000041859	43191.6	0.00511574	0.0733075	0.922974	0.960896	Mcm3	S
ENSMUSG00000036202	6258.92	-0.0154856	0.126009	0.925198	0.961504	Rif1	S
ENSMUSG00000031065	3570.29	0.0104588	0.0951826	0.931777	0.964829	Cdk16	S
ENSMUSG00000022604	865.287	-0.0103931	0.126982	0.944266	0.971447	Cep97	S
ENSMUSG00000031928	3224.12	0.00211492	0.0667162	0.960598	0.979797	Mre11a	S
ENSMUSG00000033054	2624.59	-0.00505889	0.103559	0.964248	0.981829	Npat	S
ENSMUSG00000033970	7661.03	0.00410239	0.105834	0.966367	0.982958	Rfc3	S
ENSMUSG00000014355	8477.41	0.00364124	0.153821	0.966617	0.983054	Anapc1	S
ENSMUSG00000023104	14430.2	-0.00705275	0.0825567	0.981128	0.989947	Rfc2	S
ENSMUSG00000035198	6364.56	-0.00457302	0.0987684	0.981287	0.989947	Tubg1	S
ENSMUSG00000017548	8085.81	0.00229386	0.102685	0.987559	0.993836	Suz12	S
ENSMUSG00000030346	5994.86	0.000270569	0.0967377	0.998692	0.999423	Rad51ap1	S
ENSMUSG00000063689	0.466833	0.00586422	0.243975	0.870791	1	Hist2h2ab	S
ENSMUSG00000105827	0	NA	NA	NA	1	Hist2h2bb	S
ENSMUSG00000113786	0	NA	NA	NA	1	Gm49384	S
ENSMUSG00000027699	9900.43	-2.23327	0.12164	4.93889e-77	1.849e-73	Ect2	G2M
ENSMUSG00000028678	6639.4	-0.847499	0.0847621	1.32598e-24	6.40532e-22	Kif2c	G2M
ENSMUSG00000027330	7150.62	-1.50225	0.152318	3.55323e-24	1.6628e-21	Cdc25b	G2M
ENSMUSG00000039298	1471.74	-1.20075	0.128894	8.38447e-22	3.13894e-19	Cdk5rap2	G2M
ENSMUSG00000030677	17265.4	-0.795371	0.0875159	6.56391e-21	2.18432e-18	Kif22	G2M
ENSMUSG00000038070	861.312	-0.956102	0.141894	1.27866e-12	1.32055e-10	Cntln	G2M
ENSMUSG00000029516	1175.81	-0.773736	0.128793	1.83986e-10	1.1528e-08	Cit	G2M
ENSMUSG00000038943	9957.29	-0.33292	0.0564764	1.0219e-09	5.27689e-08	Prc1	G2M
ENSMUSG00000037544	7915.03	-0.367167	0.0613212	1.15394e-09	5.83792e-08	Dlgap5	G2M
ENSMUSG00000096472	6382.01	-0.636005	0.114459	3.48725e-09	1.52695e-07	Cdkn2d	G2M
ENSMUSG00000020268	460.465	0.659861	0.11906	3.53423e-09	1.53852e-07	Lyrm7	G2M
ENSMUSG00000028551	4081.28	-0.682187	0.124755	4.38153e-09	1.84263e-07	Cdkn2c	G2M
ENSMUSG00000051517	4222.43	-0.472599	0.0853156	6.20415e-09	2.46438e-07	Arhgef39	G2M
ENSMUSG00000031360	4484.58	-0.405296	0.0726925	7.18782e-09	2.81774e-07	Ctps2	G2M
ENSMUSG00000051378	7692.75	-0.354302	0.0637597	8.83917e-09	3.39401e-07	Kif18b	G2M
ENSMUSG00000002055	7870.05	-0.350873	0.0642687	1.65836e-08	5.68283e-07	Spag5	G2M
ENSMUSG00000027469	16633.7	-0.224282	0.0403531	1.65686e-08	5.68283e-07	Tpx2	G2M
ENSMUSG00000061533	1917.06	-0.650763	0.129738	6.48777e-08	1.80584e-06	Cep128	G2M
ENSMUSG00000029464	3352.21	0.368381	0.0748387	2.68695e-07	6.28705e-06	Gpn3	G2M
ENSMUSG00000026605	5295.76	-0.45515	0.0950708	3.72017e-07	8.2956e-06	Cenpf	G2M
ENSMUSG00000034192	3369.17	0.481436	0.105181	8.85025e-07	1.74385e-05	Lsm3	G2M
ENSMUSG00000041126	17411.1	-0.446193	0.100274	1.90947e-06	3.38395e-05	H2afv	G2M
ENSMUSG00000037905	2320.46	0.399827	0.0905447	2.64397e-06	4.45871e-05	Bri3bp	G2M
ENSMUSG00000023015	17594.7	-0.279478	0.0618703	2.72453e-06	4.57857e-05	Racgap1	G2M
ENSMUSG00000034906	15496.1	-0.313424	0.0713784	5.03115e-06	7.75118e-05	Ncaph	G2M
ENSMUSG00000001517	5361.04	-0.413301	0.0984638	6.38886e-06	9.46323e-05	Foxm1	G2M
ENSMUSG00000021697	3849.43	-0.386846	0.0920109	7.70978e-06	0.000110377	Depdc1b	G2M
ENSMUSG00000048922	6741.62	-0.237663	0.0553676	9.20347e-06	0.0001286	Cdca2	G2M
ENSMUSG00000024056	10590.4	-0.376184	0.0916476	1.0783e-05	0.000147064	Ndc80	G2M
ENSMUSG00000027550	1936.18	-0.625417	0.167385	2.15852e-05	0.000264922	Lrrcc1	G2M
ENSMUSG00000048327	10095.9	-0.251604	0.0621617	2.27853e-05	0.000276676	Ckap2l	G2M
ENSMUSG00000072082	13287.1	-0.268757	0.0664318	2.55481e-05	0.00030509	Ccnf	G2M
ENSMUSG00000022364	2915.27	-0.330114	0.0832891	2.67798e-05	0.000315043	Tbc1d31	G2M
ENSMUSG00000020808	8785.99	-0.404059	0.104855	3.00744e-05	0.000351573	Pimreg	G2M
ENSMUSG00000025154	3316.21	-0.626299	0.176058	4.40345e-05	0.000488239	Arhgap19	G2M
ENSMUSG00000038252	18200.1	-0.339973	0.0901038	4.97584e-05	0.000541915	Ncapd2	G2M
ENSMUSG00000027201	1026.81	-0.372147	0.100248	5.8304e-05	0.000619221	Myef2	G2M
ENSMUSG00000035351	5251.7	0.368527	0.0982006	7.07926e-05	0.000727604	Nup37	G2M
ENSMUSG00000060288	3894.1	0.362303	0.0995973	7.76219e-05	0.000785398	Ppih	G2M
ENSMUSG00000069135	5616.96	0.316525	0.0858693	9.00005e-05	0.000896115	Fgfr1op	G2M
ENSMUSG00000028394	5778.52	0.333676	0.0920799	9.96765e-05	0.000973487	Pole3	G2M
ENSMUSG00000030654	46451.5	-0.2495	0.0694383	0.000106364	0.00102629	Arl6ip1	G2M
ENSMUSG00000027883	3930.48	-0.328788	0.0928965	0.000143758	0.00131107	Gpsm2	G2M
ENSMUSG00000022021	1219.32	-0.327801	0.0937576	0.000167871	0.00150261	Diaph3	G2M
ENSMUSG00000027306	20379.8	-0.303715	0.0860448	0.000167849	0.00150261	Nusap1	G2M
ENSMUSG00000034023	2582.41	-0.444788	0.136209	0.000216558	0.0018627	Fancd2	G2M
ENSMUSG00000036777	5515.61	-0.362653	0.108336	0.000243108	0.00204985	Anln	G2M
ENSMUSG00000021569	6223.94	0.264668	0.0774101	0.00026983	0.00223738	Trip13	G2M
ENSMUSG00000041133	15139.6	-0.217481	0.0617897	0.00028021	0.00230938	Smc1a	G2M
ENSMUSG00000045328	6890.75	-0.320964	0.0956234	0.000294527	0.00240094	Cenpe	G2M
ENSMUSG00000041064	2354.03	-0.3183	0.096733	0.000330662	0.00264371	Pif1	G2M
ENSMUSG00000026790	7245.18	-0.211616	0.0639603	0.000402264	0.00309712	Odf2	G2M
ENSMUSG00000032254	10055	-0.256366	0.0780632	0.000587731	0.00422529	Kif23	G2M
ENSMUSG00000057110	4826.62	-0.333018	0.105449	0.000668502	0.00470031	Cntrl	G2M
ENSMUSG00000022429	86.9187	-0.809094	0.348789	0.00116466	0.00743741	Dmc1	G2M
ENSMUSG00000037628	3163.67	-0.297781	0.0977344	0.00117493	0.00749666	Cdkn3	G2M
ENSMUSG00000038383	4250.35	0.260208	0.085524	0.0012125	0.00766124	Pigu	G2M
ENSMUSG00000038481	1983.56	-0.504867	0.203159	0.00167871	0.0100394	Cdk19	G2M
ENSMUSG00000023072	1871.73	-0.298976	0.106924	0.00197234	0.0114126	Cep89	G2M
ENSMUSG00000022678	9820.48	-0.22982	0.0790588	0.00214319	0.0122264	Nde1	G2M
ENSMUSG00000049932	18020.8	-0.315775	0.117156	0.00245761	0.0136813	H2afx	G2M
ENSMUSG00000027752	7987.96	0.23116	0.0814528	0.0025328	0.0140027	Exosc8	G2M
ENSMUSG00000014606	6288.4	-0.220684	0.0785409	0.00279687	0.0151859	Slc25a11	G2M
ENSMUSG00000020309	330.288	0.412013	0.166345	0.00283099	0.0153213	Chac2	G2M
ENSMUSG00000031004	19432.6	-0.259114	0.0984855	0.00289363	0.0155927	Mki67	G2M
ENSMUSG00000031878	3597.07	0.356668	0.139766	0.00293792	0.0157802	Nae1	G2M
ENSMUSG00000032218	19857.3	-0.251943	0.0917548	0.00336717	0.0176367	Ccnb2	G2M
ENSMUSG00000023505	11706.5	-0.203544	0.0791754	0.00603111	0.0282679	Cdca3	G2M
ENSMUSG00000029715	1551.84	0.26036	0.106438	0.00700734	0.0317352	Pop7	G2M
ENSMUSG00000068854	818.596	-0.308726	0.134322	0.00789171	0.0349045	Hist2h2be	G2M
ENSMUSG00000069910	2194.65	-0.174332	0.0676412	0.00838048	0.036591	Spdl1	G2M
ENSMUSG00000025630	24359.2	0.240486	0.100248	0.00933048	0.0397394	Hprt	G2M
ENSMUSG00000048668	1898.36	-0.18796	0.0766646	0.00934154	0.0397624	Rhno1	G2M
ENSMUSG00000020898	6106.2	-0.178174	0.0729521	0.0102575	0.0426564	Ctc1	G2M
ENSMUSG00000064128	1577.95	-0.281027	0.126809	0.011065	0.0452851	Cenpj	G2M
ENSMUSG00000028718	3283.4	-0.305657	0.142202	0.0123973	0.0494932	Stil	G2M
ENSMUSG00000041840	3339.57	0.285294	0.133731	0.0125467	0.0499301	Haus1	G2M
ENSMUSG00000062248	7960.94	0.247527	0.111468	0.0130767	0.0516141	Cks2	G2M
ENSMUSG00000020914	46292.9	-0.252394	0.116068	0.0141006	0.0548175	Top2a	G2M
ENSMUSG00000028068	3314.9	-0.253614	0.123081	0.0174309	0.0651591	Iqgap3	G2M
ENSMUSG00000034601	1714.57	-0.218722	0.101638	0.0175072	0.0653629	2700049A03Rik	G2M
ENSMUSG00000028312	14718.6	-0.162381	0.0750698	0.0177965	0.0661461	Smc2	G2M
ENSMUSG00000019715	6371.83	0.120496	0.0532266	0.0191884	0.0700503	Gle1	G2M
ENSMUSG00000034311	6158.28	-0.212755	0.0998575	0.0202735	0.0732439	Kif4	G2M
ENSMUSG00000001440	7079.04	0.157071	0.0718579	0.0218105	0.0776171	Kpnb1	G2M
ENSMUSG00000026873	981.596	-0.267974	0.13849	0.0219133	0.0779089	Phf19	G2M
ENSMUSG00000037313	21504.3	-0.172298	0.0806741	0.0246829	0.0854233	Tacc3	G2M
ENSMUSG00000024989	6907.27	-0.189562	0.0917905	0.0250347	0.0862026	Cep55	G2M
ENSMUSG00000041219	6298.45	-0.225532	0.110705	0.0268127	0.0907594	Arhgap11a	G2M
ENSMUSG00000020895	1113.5	0.168418	0.0808608	0.0271204	0.0915733	Tmem107	G2M
ENSMUSG00000024370	7289.53	-0.154389	0.0738681	0.0278807	0.0934453	Cdc23	G2M
ENSMUSG00000032221	2816.91	-0.196308	0.0985503	0.0280015	0.0937242	Mns1	G2M
ENSMUSG00000022033	22863.3	-0.205238	0.104895	0.0283577	0.0945363	Pbk	G2M
ENSMUSG00000019845	1760.84	-0.185182	0.0941818	0.030663	0.100133	Tube1	G2M
ENSMUSG00000003779	10414.7	-0.109843	0.0519571	0.0308421	0.100536	Kif20a	G2M
ENSMUSG00000033952	3457.05	-0.255639	0.144173	0.0311665	0.101394	Aspm	G2M
ENSMUSG00000020235	11015	-0.19651	0.102947	0.0316426	0.102542	Fzr1	G2M
ENSMUSG00000041498	609.634	-0.239954	0.131928	0.0325552	0.104864	Kif14	G2M
ENSMUSG00000037991	1890.57	0.214132	0.113727	0.0340704	0.108433	Rmi2	G2M
ENSMUSG00000029177	14012.1	-0.148326	0.0736327	0.0342505	0.108896	Cenpa	G2M
ENSMUSG00000020330	9690.69	-0.137031	0.0684679	0.03653	0.114443	Hmmr	G2M
ENSMUSG00000036223	2624.66	-0.181827	0.0969985	0.0400843	0.123607	Ska1	G2M
ENSMUSG00000023908	3085.52	-0.183263	0.100333	0.043713	0.132161	Pkmyt1	G2M
ENSMUSG00000059060	545.222	0.219711	0.12661	0.0443974	0.13349	Rad51b	G2M
ENSMUSG00000031371	2927.97	-0.155926	0.082014	0.0498038	0.145175	Haus7	G2M
ENSMUSG00000005233	13315.7	-0.192394	0.111986	0.054044	0.154173	Spc25	G2M
ENSMUSG00000033036	103.156	0.277123	0.194526	0.0541869	0.154503	Gm7879	G2M
ENSMUSG00000027184	34076	0.205143	0.122851	0.0550857	0.156392	Caprin1	G2M
ENSMUSG00000022314	13465	-0.180101	0.097171	0.0553945	0.156841	Rad21	G2M
ENSMUSG00000021965	4015.23	-0.170537	0.0988488	0.0584815	0.163182	Ska3	G2M
ENSMUSG00000029414	3104.73	-0.247416	0.168432	0.0586199	0.163409	Kntc1	G2M
ENSMUSG00000024260	868.855	-0.195627	0.118878	0.0605083	0.166933	Sap130	G2M
ENSMUSG00000033111	713.99	-0.194408	0.118665	0.0615033	0.168931	3830406C13Rik	G2M
ENSMUSG00000031756	6312.18	0.148003	0.0846285	0.0624759	0.171038	Cenpn	G2M
ENSMUSG00000024301	284.27	-0.23734	0.170251	0.0720779	0.189795	Kifc5b	G2M
ENSMUSG00000051768	5910.81	-0.138723	0.0842867	0.0779596	0.200833	Xrcc1	G2M
ENSMUSG00000058729	2273.72	-0.167492	0.107408	0.0815132	0.207218	Lin9	G2M
ENSMUSG00000038215	1300.08	-0.189943	0.127062	0.0815665	0.207308	Cep44	G2M
ENSMUSG00000028044	14823	0.0900479	0.054748	0.0868921	0.216652	Cks1b	G2M
ENSMUSG00000040084	25148	-0.103169	0.0669897	0.0886332	0.219753	Bub1b	G2M
ENSMUSG00000026239	2643.57	-0.155439	0.107601	0.0990956	0.237547	Pde6d	G2M
ENSMUSG00000054717	94656.4	-0.129504	0.0948421	0.102328	0.242655	Hmgb2	G2M
ENSMUSG00000022391	11387.7	0.099538	0.0646743	0.102927	0.243681	Rangap1	G2M
ENSMUSG00000006398	22368.4	-0.139007	0.0930479	0.10642	0.249279	Cdc20	G2M
ENSMUSG00000074476	9524.57	-0.115709	0.0755519	0.106777	0.24992	Spc24	G2M
ENSMUSG00000047044	2042.04	0.147855	0.101689	0.10923	0.253992	D030056L22Rik	G2M
ENSMUSG00000030929	705.646	-0.180101	0.12895	0.11272	0.259888	Eri2	G2M
ENSMUSG00000020492	2366.73	-0.174521	0.129124	0.113432	0.260986	Ska2	G2M
ENSMUSG00000066979	25969.1	-0.0966777	0.065276	0.113696	0.261456	Bub3	G2M
ENSMUSG00000033222	3620.3	0.117501	0.0796164	0.114007	0.261929	Ttf2	G2M
ENSMUSG00000038225	430.697	-0.169913	0.131302	0.127184	0.282077	Primpol	G2M
ENSMUSG00000026708	4597.86	-0.135567	0.0987743	0.13151	0.288635	Cenpl	G2M
ENSMUSG00000024542	2269.59	-0.18731	0.162579	0.139982	0.301052	Cep192	G2M
ENSMUSG00000036768	6435.78	-0.121749	0.0876035	0.145165	0.30861	Kif15	G2M
ENSMUSG00000020493	2025.62	-0.147655	0.117088	0.150065	0.315931	Prr11	G2M
ENSMUSG00000036403	911.362	-0.178558	0.157473	0.153556	0.320042	Cep135	G2M
ENSMUSG00000026039	726.063	-0.152865	0.124447	0.155082	0.321789	Sgo2a	G2M
ENSMUSG00000029782	6172.62	0.126018	0.0974107	0.157644	0.325752	Tmem209	G2M
ENSMUSG00000032400	1689.65	0.110007	0.0843194	0.162813	0.332985	Zwilch	G2M
ENSMUSG00000047534	6398.37	-0.152017	0.129434	0.167435	0.338922	Mis18bp1	G2M
ENSMUSG00000031262	4840.28	-0.102216	0.0800255	0.174773	0.34887	Cenpi	G2M
ENSMUSG00000022385	5328.69	-0.0975118	0.0765621	0.178774	0.354588	Gtse1	G2M
ENSMUSG00000021115	9418.57	0.0927784	0.072853	0.180045	0.356198	Vrk1	G2M
ENSMUSG00000050628	1043.4	-0.140856	0.121668	0.180823	0.357091	Ubald2	G2M
ENSMUSG00000037894	93606.5	0.112533	0.0917549	0.185232	0.362833	H2afz	G2M
ENSMUSG00000012443	26860.7	-0.132397	0.115112	0.185334	0.362889	Kif11	G2M
ENSMUSG00000037020	1839.22	-0.1534	0.141844	0.188245	0.366875	Wdr62	G2M
ENSMUSG00000015880	12467.1	-0.115642	0.105733	0.190968	0.37048	Ncapg	G2M
ENSMUSG00000001403	19956.3	0.0813193	0.0607405	0.191953	0.371596	Ube2c	G2M
ENSMUSG00000028614	6375.13	0.15662	0.132382	0.194532	0.374822	Ndc1	G2M
ENSMUSG00000050555	999.968	-0.133632	0.118325	0.195197	0.375794	Hyls1	G2M
ENSMUSG00000044201	2648.24	-0.119514	0.100817	0.196699	0.378024	Cdc25c	G2M
ENSMUSG00000039187	2826.14	-0.109614	0.0935083	0.200646	0.38325	Fanci	G2M
ENSMUSG00000018362	55891.5	0.109789	0.0942642	0.20922	0.394842	Kpna2	G2M
ENSMUSG00000022978	4575.5	0.125567	0.113312	0.210159	0.395973	Mis18a	G2M
ENSMUSG00000033752	972.835	0.130888	0.119975	0.211275	0.397352	Mnd1	G2M
ENSMUSG00000035683	5194.8	-0.0918793	0.0793489	0.222701	0.411696	Melk	G2M
ENSMUSG00000003778	14889.9	-0.0816153	0.0665674	0.222812	0.411757	Brd8	G2M
ENSMUSG00000040549	10869.5	-0.135008	0.135365	0.233016	0.424348	Ckap5	G2M
ENSMUSG00000036023	6653.71	0.104618	0.0990261	0.252121	0.448281	Parp2	G2M
ENSMUSG00000002428	2288.81	-0.130379	0.137286	0.254052	0.450015	Hltf	G2M
ENSMUSG00000038379	5593.5	-0.100493	0.0932641	0.255618	0.451773	Ttk	G2M
ENSMUSG00000022024	2998.78	-0.0840311	0.0792842	0.260621	0.457643	Sugt1	G2M
ENSMUSG00000035293	2699.79	-0.131138	0.1446	0.262575	0.459729	G2e3	G2M
ENSMUSG00000056531	1126.47	-0.117271	0.126215	0.275793	0.474494	Ccdc18	G2M
ENSMUSG00000026281	7765.32	0.0628692	0.0593943	0.277785	0.476507	Dtymk	G2M
ENSMUSG00000063172	259.874	0.120526	0.132149	0.280989	0.480508	Hspb11	G2M
ENSMUSG00000032783	1736.55	-0.0891649	0.0894079	0.281532	0.481271	Troap	G2M
ENSMUSG00000023004	41713.3	0.0670429	0.0646241	0.282007	0.481755	Tuba1b	G2M
ENSMUSG00000036672	1625.85	-0.119303	0.126559	0.282622	0.48214	Cenpt	G2M
ENSMUSG00000028873	15862.5	-0.0813368	0.0854634	0.30347	0.504381	Cdca8	G2M
ENSMUSG00000037725	5359.37	-0.0906678	0.0968302	0.305732	0.506565	Ckap2	G2M
ENSMUSG00000019942	18046.7	0.0820406	0.0812389	0.312964	0.51428	Cdk1	G2M
ENSMUSG00000029012	1508.51	-0.0840399	0.0917307	0.314094	0.515345	Orc5	G2M
ENSMUSG00000028175	3501.82	-0.116733	0.145953	0.32572	0.527885	Depdc1a	G2M
ENSMUSG00000027160	1369.22	-0.100319	0.116642	0.327925	0.530196	Ccdc34	G2M
ENSMUSG00000075266	2393.13	0.0890295	0.0995439	0.330436	0.533162	Cenpw	G2M
ENSMUSG00000058290	4172.02	-0.107174	0.131915	0.336105	0.539115	Espl1	G2M
ENSMUSG00000019992	2337.26	0.09339	0.108442	0.337538	0.54071	Mtfr2	G2M
ENSMUSG00000036752	31767.5	0.06079	0.0623019	0.392824	0.591745	Tubb4b	G2M
ENSMUSG00000020290	20827.6	0.100941	0.146731	0.395132	0.594384	Xpo1	G2M
ENSMUSG00000019961	43304.4	-0.0658052	0.0889704	0.39677	0.595713	Tmpo	G2M
ENSMUSG00000068744	1309.2	0.0770678	0.101815	0.400405	0.598888	Psrc1	G2M
ENSMUSG00000019370	11549	-0.0691885	0.0986389	0.407158	0.606022	Calm3	G2M
ENSMUSG00000044906	1774.38	0.0848424	0.116538	0.407919	0.606793	4930503L19Rik	G2M
ENSMUSG00000060981	19.9025	-0.0811811	0.23408	0.421327	0.619295	Hist1h4h	G2M
ENSMUSG00000018102	381.942	-0.0989916	0.175876	0.434243	0.63078	Hist1h2bc	G2M
ENSMUSG00000022070	4621.01	0.0552804	0.0864678	0.494359	0.682244	Bora	G2M
ENSMUSG00000040667	9208.69	-0.0503989	0.0796662	0.497664	0.68501	Nup88	G2M
ENSMUSG00000030641	1981.46	0.0662041	0.109138	0.509159	0.694778	Ddias	G2M
ENSMUSG00000027379	11947.8	-0.0469684	0.074013	0.520584	0.704604	Bub1	G2M
ENSMUSG00000072980	3426.05	0.0678299	0.137737	0.538482	0.718888	Oip5	G2M
ENSMUSG00000034349	30811.8	-0.0624719	0.121735	0.546944	0.726811	Smc4	G2M
ENSMUSG00000021615	595.497	-0.0609117	0.125344	0.550606	0.729804	Xrcc4	G2M
ENSMUSG00000038000	4922	-0.060945	0.118518	0.555319	0.733648	Acd	G2M
ENSMUSG00000024795	6292.52	-0.0587284	0.122068	0.56028	0.737352	Kif20b	G2M
ENSMUSG00000041431	43711.2	0.0539576	0.0949557	0.561515	0.738251	Ccnb1	G2M
ENSMUSG00000022322	13739.4	-0.0516326	0.0991082	0.5658	0.741009	Shcbp1	G2M
ENSMUSG00000036022	1073.22	0.0584675	0.115486	0.568013	0.742766	Fam122b	G2M
ENSMUSG00000040204	52507.8	0.0500436	0.0927024	0.571908	0.745551	Pclaf	G2M
ENSMUSG00000029910	11974.6	0.045763	0.0871148	0.577596	0.750217	Mad2l1	G2M
ENSMUSG00000027715	31451.5	-0.0340259	0.0670634	0.610498	0.775083	Ccna2	G2M
ENSMUSG00000051235	1845.09	-0.0577939	0.13663	0.612442	0.775862	Gen1	G2M
ENSMUSG00000025758	8376.31	0.0424137	0.0707194	0.616191	0.77836	Plk4	G2M
ENSMUSG00000002297	5213.45	0.0345965	0.0850474	0.617108	0.779059	Dbf4	G2M
ENSMUSG00000026779	1496.99	0.0521714	0.118123	0.623102	0.78347	Mastl	G2M
ENSMUSG00000068101	3810.2	-0.0449273	0.100966	0.623917	0.783953	Cenpm	G2M
ENSMUSG00000026622	8043.28	-0.0306099	0.0602695	0.629894	0.788181	Nek2	G2M
ENSMUSG00000007035	1236.36	0.0417868	0.0965767	0.64009	0.795795	Msh5	G2M
ENSMUSG00000027635	3353.76	-0.0365192	0.0841558	0.645174	0.79913	Dsn1	G2M
ENSMUSG00000025925	3609.27	-0.0384554	0.0924462	0.655661	0.804862	Terf1	G2M
ENSMUSG00000026683	12178	0.0337218	0.0792988	0.655085	0.804862	Nuf2	G2M
ENSMUSG00000024660	12918.8	-0.0340259	0.080625	0.657875	0.806127	Incenp	G2M
ENSMUSG00000041879	8617.62	-0.0333676	0.0953575	0.671672	0.816052	Ipo9	G2M
ENSMUSG00000021391	1098.58	-0.0479148	0.13784	0.673235	0.816794	Cenpp	G2M
ENSMUSG00000028832	89660.1	0.0360402	0.0904453	0.673818	0.817067	Stmn1	G2M
ENSMUSG00000035365	1341.01	-0.0315595	0.0833378	0.696515	0.832109	Parpbp	G2M
ENSMUSG00000023932	7891.29	0.0163524	0.079177	0.708882	0.8407	Cdc5l	G2M
ENSMUSG00000027115	5578.42	0.039735	0.12104	0.709199	0.840809	Kif18a	G2M
ENSMUSG00000028619	893.426	-0.0355776	0.102942	0.70971	0.841139	Tceanc2	G2M
ENSMUSG00000027326	6177.71	-0.0433789	0.137135	0.711295	0.841687	Knl1	G2M
ENSMUSG00000053128	64.3021	-0.0436942	0.188659	0.719372	0.847593	Rnf26	G2M
ENSMUSG00000034317	12548	0.0381459	0.122412	0.720351	0.848188	Trim59	G2M
ENSMUSG00000079553	1836.09	-0.0398573	0.133395	0.721099	0.848602	Kifc1	G2M
ENSMUSG00000017716	15920.6	-0.0191415	0.0604464	0.742322	0.861727	Birc5	G2M
ENSMUSG00000027654	1512.48	-0.0356263	0.129476	0.744655	0.863097	Fam83d	G2M
ENSMUSG00000032815	1428.74	0.0289268	0.0926865	0.748531	0.865908	Fanca	G2M
ENSMUSG00000023345	2116.7	0.0247147	0.100461	0.768256	0.8791	Poc1a	G2M
ENSMUSG00000027496	10622.6	-0.0202378	0.0855674	0.773909	0.882858	Aurka	G2M
ENSMUSG00000035310	2543.88	-0.027282	0.110815	0.776756	0.884758	Lin54	G2M
ENSMUSG00000020415	1180.66	-0.0183273	0.0706719	0.789808	0.892228	Pttg1	G2M
ENSMUSG00000028549	901.965	-0.0262824	0.11174	0.791233	0.892983	Itgb3bp	G2M
ENSMUSG00000010517	7320.54	0.0138803	0.0616622	0.795392	0.895025	Faf1	G2M
ENSMUSG00000008822	1047.4	0.0250006	0.121338	0.812321	0.904424	Acyp1	G2M
ENSMUSG00000029521	1710.05	0.0196387	0.0955638	0.821411	0.909783	Chek2	G2M
ENSMUSG00000030867	12248.7	-0.0143961	0.0762695	0.826875	0.91323	Plk1	G2M
ENSMUSG00000059409	6180.61	-0.0124537	0.0633937	0.853579	0.92814	Ppp2r5d	G2M
ENSMUSG00000033031	6868.17	-0.0143765	0.100388	0.863291	0.933232	C330027C09Rik	G2M
ENSMUSG00000030177	1295.99	0.0149463	0.130007	0.893341	0.94671	Ccdc77	G2M
ENSMUSG00000019813	2240.29	0.0109226	0.08605	0.900173	0.949869	Cep57l1	G2M
ENSMUSG00000015217	11264.8	0.00791451	0.0825902	0.902402	0.950795	Hmgb3	G2M
ENSMUSG00000003190	352.548	0.0123348	0.123911	0.909243	0.954297	Bcl2l12	G2M
ENSMUSG00000027331	4083.76	0.00813965	0.0782983	0.913799	0.956398	Knstrn	G2M
ENSMUSG00000023940	6371.73	0.00640601	0.073848	0.927125	0.962408	Sgo1	G2M
ENSMUSG00000020687	3352.46	-0.00713926	0.10308	0.931531	0.964641	Cdc27	G2M
ENSMUSG00000023919	3615.61	0.00648779	0.100964	0.939055	0.969538	Cenpq	G2M
ENSMUSG00000021902	1080.58	0.0076411	0.103189	0.951954	0.975626	Phf7	G2M
ENSMUSG00000020897	18185.8	0.00531598	0.0763386	0.960153	0.979745	Aurkb	G2M
ENSMUSG00000026434	9136.67	0.00277153	0.098542	0.977485	0.988042	Nucks1	G2M
ENSMUSG00000033589	4444.54	0.00043183	0.0590308	0.991897	0.995833	Reep4	G2M
ENSMUSG00000066878	690.786	0.000511658	0.128719	0.997551	0.998818	Gm10184	G2M
ENSMUSG00000027699	9900.43	-2.23327	0.12164	4.93889e-77	1.849e-73	Ect2	All_Gio
ENSMUSG00000025747	12754.4	-0.781533	0.0768538	2.86301e-25	1.5312e-22	Tyms	All_Gio
ENSMUSG00000028678	6639.4	-0.847499	0.0847621	1.32598e-24	6.40532e-22	Kif2c	All_Gio
ENSMUSG00000027330	7150.62	-1.50225	0.152318	3.55323e-24	1.6628e-21	Cdc25b	All_Gio
ENSMUSG00000039298	1471.74	-1.20075	0.128894	8.38447e-22	3.13894e-19	Cdk5rap2	All_Gio
ENSMUSG00000030677	17265.4	-0.795371	0.0875159	6.56391e-21	2.18432e-18	Kif22	All_Gio
ENSMUSG00000038070	861.312	-0.956102	0.141894	1.27866e-12	1.32055e-10	Cntln	All_Gio
ENSMUSG00000001436	5119.1	0.679687	0.102292	3.75263e-12	3.49041e-10	Slc19a1	All_Gio
ENSMUSG00000021485	3568.88	-0.637741	0.0985421	1.2293e-11	1.01147e-09	Mxd3	All_Gio
ENSMUSG00000029516	1175.81	-0.773736	0.128793	1.83986e-10	1.1528e-08	Cit	All_Gio
ENSMUSG00000038943	9957.29	-0.33292	0.0564764	1.0219e-09	5.27689e-08	Prc1	All_Gio
ENSMUSG00000037544	7915.03	-0.367167	0.0613212	1.15394e-09	5.83792e-08	Dlgap5	All_Gio
ENSMUSG00000096472	6382.01	-0.636005	0.114459	3.48725e-09	1.52695e-07	Cdkn2d	All_Gio
ENSMUSG00000020268	460.465	0.659861	0.11906	3.53423e-09	1.53852e-07	Lyrm7	All_Gio
ENSMUSG00000047242	652.978	-0.810487	0.148404	4.26662e-09	1.79979e-07	Taf9b	All_Gio
ENSMUSG00000028551	4081.28	-0.682187	0.124755	4.38153e-09	1.84263e-07	Cdkn2c	All_Gio
ENSMUSG00000041238	4059.72	-0.355706	0.0624813	4.57712e-09	1.90056e-07	Rbbp8	All_Gio
ENSMUSG00000002319	920.653	0.73525	0.134435	4.76615e-09	1.96923e-07	Ipo4	All_Gio
ENSMUSG00000051517	4222.43	-0.472599	0.0853156	6.20415e-09	2.46438e-07	Arhgef39	All_Gio
ENSMUSG00000031360	4484.58	-0.405296	0.0726925	7.18782e-09	2.81774e-07	Ctps2	All_Gio
ENSMUSG00000051378	7692.75	-0.354302	0.0637597	8.83917e-09	3.39401e-07	Kif18b	All_Gio
ENSMUSG00000029863	6514.46	-0.582999	0.108682	1.14136e-08	4.19949e-07	Casp2	All_Gio
ENSMUSG00000021572	2468.77	-0.468783	0.0871393	1.61459e-08	5.59687e-07	Cep72	All_Gio
ENSMUSG00000002055	7870.05	-0.350873	0.0642687	1.65836e-08	5.68283e-07	Spag5	All_Gio
ENSMUSG00000027469	16633.7	-0.224282	0.0403531	1.65686e-08	5.68283e-07	Tpx2	All_Gio
ENSMUSG00000007739	25643	0.447811	0.0874467	4.24014e-08	1.27759e-06	Cct4	All_Gio
ENSMUSG00000061533	1917.06	-0.650763	0.129738	6.48777e-08	1.80584e-06	Cep128	All_Gio
ENSMUSG00000022177	5985.79	-0.408202	0.0816447	1.56256e-07	3.91948e-06	Haus4	All_Gio
ENSMUSG00000029464	3352.21	0.368381	0.0748387	2.68695e-07	6.28705e-06	Gpn3	All_Gio
ENSMUSG00000026245	10776.5	0.398249	0.0814388	2.89124e-07	6.72302e-06	Farsb	All_Gio
ENSMUSG00000027424	1551.9	0.329676	0.0670222	3.2678e-07	7.47103e-06	Mgme1	All_Gio
ENSMUSG00000025364	13094.1	0.497791	0.10435	3.40806e-07	7.74442e-06	Pa2g4	All_Gio
ENSMUSG00000026605	5295.76	-0.45515	0.0950708	3.72017e-07	8.2956e-06	Cenpf	All_Gio
ENSMUSG00000042462	3938.37	0.549322	0.11861	5.8736e-07	1.22163e-05	Dctpp1	All_Gio
ENSMUSG00000022234	43830.5	0.433966	0.092711	6.52606e-07	1.33508e-05	Cct5	All_Gio
ENSMUSG00000034192	3369.17	0.481436	0.105181	8.85025e-07	1.74385e-05	Lsm3	All_Gio
ENSMUSG00000017561	13404.5	-0.293428	0.0620498	9.9981e-07	1.9294e-05	Crlf3	All_Gio
ENSMUSG00000001416	36013	0.374158	0.0806148	1.0189e-06	1.96118e-05	Cct3	All_Gio
ENSMUSG00000025436	939.897	0.58423	0.134202	1.89403e-06	3.36853e-05	Atp23	All_Gio
ENSMUSG00000041126	17411.1	-0.446193	0.100274	1.90947e-06	3.38395e-05	H2afv	All_Gio
ENSMUSG00000007050	4466.54	0.329547	0.0724149	1.9988e-06	3.50902e-05	Lsm2	All_Gio
ENSMUSG00000050410	6824.43	-0.50184	0.115483	2.5511e-06	4.32158e-05	Tcf19	All_Gio
ENSMUSG00000037905	2320.46	0.399827	0.0905447	2.64397e-06	4.45871e-05	Bri3bp	All_Gio
ENSMUSG00000023015	17594.7	-0.279478	0.0618703	2.72453e-06	4.57857e-05	Racgap1	All_Gio
ENSMUSG00000062510	3192.23	-0.305597	0.0674787	2.73769e-06	4.59093e-05	Nsl1	All_Gio
ENSMUSG00000052369	1828.48	-0.445765	0.103841	3.82053e-06	6.08605e-05	Tmem106c	All_Gio
ENSMUSG00000034906	15496.1	-0.313424	0.0713784	5.03115e-06	7.75118e-05	Ncaph	All_Gio
ENSMUSG00000020185	1762.85	-0.522447	0.126102	5.57949e-06	8.43969e-05	E2f7	All_Gio
ENSMUSG00000001517	5361.04	-0.413301	0.0984638	6.38886e-06	9.46323e-05	Foxm1	All_Gio
ENSMUSG00000021697	3849.43	-0.386846	0.0920109	7.70978e-06	0.000110377	Depdc1b	All_Gio
ENSMUSG00000048922	6741.62	-0.237663	0.0553676	9.20347e-06	0.0001286	Cdca2	All_Gio
ENSMUSG00000001151	1622.71	-0.557616	0.140188	9.87344e-06	0.000136523	Pcnt	All_Gio
ENSMUSG00000024056	10590.4	-0.376184	0.0916476	1.0783e-05	0.000147064	Ndc80	All_Gio
ENSMUSG00000032782	1407.22	-0.456622	0.1145	1.36185e-05	0.000179838	Cntrob	All_Gio
ENSMUSG00000052926	4162.97	0.306648	0.0752353	1.95745e-05	0.000244682	Rnaseh2a	All_Gio
ENSMUSG00000028693	10493.8	0.307889	0.0764006	2.10119e-05	0.000259063	Nasp	All_Gio
ENSMUSG00000027550	1936.18	-0.625417	0.167385	2.15852e-05	0.000264922	Lrrcc1	All_Gio
ENSMUSG00000048327	10095.9	-0.251604	0.0621617	2.27853e-05	0.000276676	Ckap2l	All_Gio
ENSMUSG00000030322	1952.9	-0.420145	0.108021	2.38666e-05	0.00028707	Mbd4	All_Gio
ENSMUSG00000072082	13287.1	-0.268757	0.0664318	2.55481e-05	0.00030509	Ccnf	All_Gio
ENSMUSG00000034024	15079.2	0.305349	0.0774777	2.56279e-05	0.000305556	Cct2	All_Gio
ENSMUSG00000022364	2915.27	-0.330114	0.0832891	2.67798e-05	0.000315043	Tbc1d31	All_Gio
ENSMUSG00000020808	8785.99	-0.404059	0.104855	3.00744e-05	0.000351573	Pimreg	All_Gio
ENSMUSG00000029430	74956	0.351776	0.0908451	3.64242e-05	0.000414163	Ran	All_Gio
ENSMUSG00000025154	3316.21	-0.626299	0.176058	4.40345e-05	0.000488239	Arhgap19	All_Gio
ENSMUSG00000038252	18200.1	-0.339973	0.0901038	4.97584e-05	0.000541915	Ncapd2	All_Gio
ENSMUSG00000005732	13617.6	0.380749	0.101512	5.39171e-05	0.000578373	Ranbp1	All_Gio
ENSMUSG00000027201	1026.81	-0.372147	0.100248	5.8304e-05	0.000619221	Myef2	All_Gio
ENSMUSG00000035351	5251.7	0.368527	0.0982006	7.07926e-05	0.000727604	Nup37	All_Gio
ENSMUSG00000060288	3894.1	0.362303	0.0995973	7.76219e-05	0.000785398	Ppih	All_Gio
ENSMUSG00000026036	1848.5	0.557852	0.161737	7.86817e-05	0.000793974	Nif3l1	All_Gio
ENSMUSG00000069135	5616.96	0.316525	0.0858693	9.00005e-05	0.000896115	Fgfr1op	All_Gio
ENSMUSG00000026709	5557.54	0.298971	0.0818088	9.38425e-05	0.000925752	Dars2	All_Gio
ENSMUSG00000037443	6829.06	-0.31881	0.0875848	9.89624e-05	0.000967338	Cep85	All_Gio
ENSMUSG00000028394	5778.52	0.333676	0.0920799	9.96765e-05	0.000973487	Pole3	All_Gio
ENSMUSG00000027641	8560.35	-0.4887	0.142306	0.000103077	0.00100103	Rbl1	All_Gio
ENSMUSG00000021048	11713.4	0.414571	0.11783	0.00010557	0.00101995	Mthfd1	All_Gio
ENSMUSG00000030654	46451.5	-0.2495	0.0694383	0.000106364	0.00102629	Arl6ip1	All_Gio
ENSMUSG00000028453	2097.48	-0.29862	0.0852968	0.000107699	0.00103583	Fancg	All_Gio
ENSMUSG00000045751	3831.85	-0.373163	0.105009	0.000110929	0.00106212	Mms22l	All_Gio
ENSMUSG00000040312	1252.75	-0.499333	0.146659	0.000113593	0.00108072	Cchcr1	All_Gio
ENSMUSG00000022471	19919.1	-0.224057	0.0602686	0.000124294	0.00116404	Xrcc6	All_Gio
ENSMUSG00000024800	4039.67	0.321684	0.0895238	0.000126692	0.00118133	Rpp30	All_Gio
ENSMUSG00000008690	16075.4	-0.286607	0.0795107	0.000140943	0.00128933	Ncaph2	All_Gio
ENSMUSG00000027883	3930.48	-0.328788	0.0928965	0.000143758	0.00131107	Gpsm2	All_Gio
ENSMUSG00000035024	8993.42	-0.386904	0.112544	0.000157094	0.00141715	Ncapd3	All_Gio
ENSMUSG00000022021	1219.32	-0.327801	0.0937576	0.000167871	0.00150261	Diaph3	All_Gio
ENSMUSG00000027306	20379.8	-0.303715	0.0860448	0.000167849	0.00150261	Nusap1	All_Gio
ENSMUSG00000029366	30225.9	-0.383325	0.113611	0.000200751	0.00175292	Dck	All_Gio
ENSMUSG00000034023	2582.41	-0.444788	0.136209	0.000216558	0.0018627	Fancd2	All_Gio
ENSMUSG00000036777	5515.61	-0.362653	0.108336	0.000243108	0.00204985	Anln	All_Gio
ENSMUSG00000021569	6223.94	0.264668	0.0774101	0.00026983	0.00223738	Trip13	All_Gio
ENSMUSG00000041133	15139.6	-0.217481	0.0617897	0.00028021	0.00230938	Smc1a	All_Gio
ENSMUSG00000044783	14068.6	-0.36012	0.10915	0.000282081	0.00231969	Hjurp	All_Gio
ENSMUSG00000039748	5025.66	0.296033	0.086051	0.000282545	0.00232224	Exo1	All_Gio
ENSMUSG00000045328	6890.75	-0.320964	0.0956234	0.000294527	0.00240094	Cenpe	All_Gio
ENSMUSG00000055612	31669.4	0.267504	0.0780362	0.000295131	0.00240326	Cdca7	All_Gio
ENSMUSG00000027454	3025.81	0.292051	0.0868917	0.000330164	0.00264113	Gins1	All_Gio
ENSMUSG00000041064	2354.03	-0.3183	0.096733	0.000330662	0.00264371	Pif1	All_Gio
ENSMUSG00000005698	14653.1	-0.153212	0.0441784	0.000375741	0.00292601	Ctcf	All_Gio
ENSMUSG00000028333	30629.5	0.273569	0.0817961	0.000387203	0.00300123	Anp32b	All_Gio
ENSMUSG00000026790	7245.18	-0.211616	0.0639603	0.000402264	0.00309712	Odf2	All_Gio
ENSMUSG00000022369	1874.88	-0.355179	0.113498	0.000542601	0.00396766	Mtbp	All_Gio
ENSMUSG00000032254	10055	-0.256366	0.0780632	0.000587731	0.00422529	Kif23	All_Gio
ENSMUSG00000028896	11393.4	0.215465	0.0657218	0.000637856	0.00451413	Rcc1	All_Gio
ENSMUSG00000057110	4826.62	-0.333018	0.105449	0.000668502	0.00470031	Cntrl	All_Gio
ENSMUSG00000031971	943.451	-0.375254	0.124396	0.00069606	0.00484588	Ccsap	All_Gio
ENSMUSG00000039509	7015.77	0.180087	0.0546985	0.000757832	0.00520098	Nup133	All_Gio
ENSMUSG00000040034	2795.94	0.344324	0.115109	0.00087586	0.00591077	Nup43	All_Gio
ENSMUSG00000031575	7782.51	0.164468	0.0511024	0.000980379	0.00646178	Ash2l	All_Gio
ENSMUSG00000027845	921.826	-0.361768	0.123839	0.00100363	0.00658605	Dclre1b	All_Gio
ENSMUSG00000043015	1122.69	-0.376764	0.13139	0.00110175	0.00711153	Nemp2	All_Gio
ENSMUSG00000027203	12305.8	0.221788	0.0716959	0.00114806	0.00734873	Dut	All_Gio
ENSMUSG00000022429	86.9187	-0.809094	0.348789	0.00116466	0.00743741	Dmc1	All_Gio
ENSMUSG00000037628	3163.67	-0.297781	0.0977344	0.00117493	0.00749666	Cdkn3	All_Gio
ENSMUSG00000038482	28053	0.229182	0.0744568	0.00117646	0.00750002	Tfdp1	All_Gio
ENSMUSG00000006728	34569.9	0.281576	0.0938085	0.00119011	0.0075533	Cdk4	All_Gio
ENSMUSG00000038383	4250.35	0.260208	0.085524	0.0012125	0.00766124	Pigu	All_Gio
ENSMUSG00000029247	35281.1	0.335384	0.116427	0.0012272	0.00773779	Paics	All_Gio
ENSMUSG00000042208	2561.35	0.385737	0.135525	0.00124375	0.00782901	0610010F05Rik	All_Gio
ENSMUSG00000027353	2621.47	0.277343	0.0929516	0.00127421	0.00797716	Mcm8	All_Gio
ENSMUSG00000038481	1983.56	-0.504867	0.203159	0.00167871	0.0100394	Cdk19	All_Gio
ENSMUSG00000043872	1253.78	0.326203	0.116731	0.00176922	0.0104595	Zmym1	All_Gio
ENSMUSG00000019373	8292.06	0.287636	0.100408	0.00178078	0.0105155	Cops3	All_Gio
ENSMUSG00000005470	26836.6	-0.322918	0.1158	0.00184119	0.0107921	Asf1b	All_Gio
ENSMUSG00000023072	1871.73	-0.298976	0.106924	0.00197234	0.0114126	Cep89	All_Gio
ENSMUSG00000054309	9463.36	0.213997	0.0735299	0.0020922	0.011972	Cpsf3	All_Gio
ENSMUSG00000022678	9820.48	-0.22982	0.0790588	0.00214319	0.0122264	Nde1	All_Gio
ENSMUSG00000002718	22224.7	0.278125	0.098742	0.0021446	0.0122297	Cse1l	All_Gio
ENSMUSG00000078773	2134.52	-0.201107	0.0693648	0.00238029	0.0133236	Rad54b	All_Gio
ENSMUSG00000039396	7209.23	-0.292686	0.106129	0.00238525	0.013338	Neil3	All_Gio
ENSMUSG00000049932	18020.8	-0.315775	0.117156	0.00245761	0.0136813	H2afx	All_Gio
ENSMUSG00000052798	11292.1	0.190253	0.0659426	0.00250158	0.0138642	Nup107	All_Gio
ENSMUSG00000003868	11248.1	0.315999	0.11807	0.00253185	0.0140027	Ruvbl2	All_Gio
ENSMUSG00000027752	7987.96	0.23116	0.0814528	0.0025328	0.0140027	Exosc8	All_Gio
ENSMUSG00000036181	384.868	-0.42403	0.16979	0.00254428	0.0140541	Hist1h1c	All_Gio
ENSMUSG00000048170	11443.6	0.174299	0.0605828	0.00276149	0.0150266	Mcmbp	All_Gio
ENSMUSG00000068114	1756.94	-0.285989	0.105219	0.0027813	0.0151125	Ccdc134	All_Gio
ENSMUSG00000014606	6288.4	-0.220684	0.0785409	0.00279687	0.0151859	Slc25a11	All_Gio
ENSMUSG00000020309	330.288	0.412013	0.166345	0.00283099	0.0153213	Chac2	All_Gio
ENSMUSG00000031004	19432.6	-0.259114	0.0984855	0.00289363	0.0155927	Mki67	All_Gio
ENSMUSG00000038010	1202.83	-0.381451	0.151515	0.00292268	0.015721	Ccdc138	All_Gio
ENSMUSG00000031878	3597.07	0.356668	0.139766	0.00293792	0.0157802	Nae1	All_Gio
ENSMUSG00000004880	45083.2	-0.244796	0.0881465	0.00325709	0.0171381	Lbr	All_Gio
ENSMUSG00000032218	19857.3	-0.251943	0.0917548	0.00336717	0.0176367	Ccnb2	All_Gio
ENSMUSG00000022881	9582.9	0.268682	0.100566	0.00349966	0.0181884	Rfc4	All_Gio
ENSMUSG00000023942	9207.02	0.245122	0.0883004	0.00399314	0.0203461	Slc29a1	All_Gio
ENSMUSG00000020527	285.135	-0.528941	0.254405	0.00433692	0.0217924	Myo19	All_Gio
ENSMUSG00000061286	3021.77	0.247205	0.0940761	0.00440988	0.0220863	Exosc5	All_Gio
ENSMUSG00000078521	1539.51	0.366536	0.154067	0.00459911	0.0228354	Aunip	All_Gio
ENSMUSG00000046179	3428.87	-0.233873	0.0909673	0.00470743	0.0232499	E2f8	All_Gio
ENSMUSG00000034303	658.875	0.321318	0.131736	0.0049789	0.0242863	Ccdc15	All_Gio
ENSMUSG00000019773	12386.1	-0.227032	0.0884619	0.00517515	0.0249662	Fbxo5	All_Gio
ENSMUSG00000025742	9600.59	0.279115	0.113153	0.00554941	0.0263792	Prps2	All_Gio
ENSMUSG00000020974	2041.85	0.27468	0.110448	0.00570568	0.0269705	Pole2	All_Gio
ENSMUSG00000027722	2718.2	0.244055	0.0971524	0.00571772	0.0270103	Spata5	All_Gio
ENSMUSG00000032264	5092.1	-0.207557	0.0798719	0.00602621	0.0282538	Zw10	All_Gio
ENSMUSG00000023505	11706.5	-0.203544	0.0791754	0.00603111	0.0282679	Cdca3	All_Gio
ENSMUSG00000055660	1687.92	0.259752	0.104366	0.00607878	0.0284646	Mettl4	All_Gio
ENSMUSG00000006763	1804.82	-0.282723	0.117721	0.00615675	0.0287398	Saal1	All_Gio
ENSMUSG00000009575	6626.69	0.220626	0.0868675	0.00641568	0.0296986	Cbx5	All_Gio
ENSMUSG00000029715	1551.84	0.26036	0.106438	0.00700734	0.0317352	Pop7	All_Gio
ENSMUSG00000068854	818.596	-0.308726	0.134322	0.00789171	0.0349045	Hist2h2be	All_Gio
ENSMUSG00000037103	1844.02	-0.267654	0.113129	0.00790993	0.034962	Dcaf15	All_Gio
ENSMUSG00000069910	2194.65	-0.174332	0.0676412	0.00838048	0.036591	Spdl1	All_Gio
ENSMUSG00000026496	38479.2	0.16921	0.0688492	0.0087607	0.0378405	Parp1	All_Gio
ENSMUSG00000034329	4142.27	-0.257045	0.109839	0.0090235	0.0387628	Brip1	All_Gio
ENSMUSG00000028587	1332.8	0.251817	0.107466	0.00920885	0.039367	Orc1	All_Gio
ENSMUSG00000025630	24359.2	0.240486	0.100248	0.00933048	0.0397394	Hprt	All_Gio
ENSMUSG00000048668	1898.36	-0.18796	0.0766646	0.00934154	0.0397624	Rhno1	All_Gio
ENSMUSG00000022142	4040.08	0.295861	0.133197	0.00995337	0.0416845	Nup155	All_Gio
ENSMUSG00000020898	6106.2	-0.178174	0.0729521	0.0102575	0.0426564	Ctc1	All_Gio
ENSMUSG00000028438	933.486	-0.324285	0.153335	0.0107413	0.0442261	Kif24	All_Gio
ENSMUSG00000018189	11319.4	0.239211	0.101618	0.0109819	0.0450064	Uchl5	All_Gio
ENSMUSG00000064128	1577.95	-0.281027	0.126809	0.011065	0.0452851	Cenpj	All_Gio
ENSMUSG00000026187	1684.6	0.233941	0.101662	0.0115572	0.046915	Xrcc5	All_Gio
ENSMUSG00000025646	1327.64	0.232547	0.101091	0.011613	0.0470522	Atrip	All_Gio
ENSMUSG00000033405	419.959	0.358433	0.181246	0.0120496	0.0484281	Nudt15	All_Gio
ENSMUSG00000028718	3283.4	-0.305657	0.142202	0.0123973	0.0494932	Stil	All_Gio
ENSMUSG00000041840	3339.57	0.285294	0.133731	0.0125467	0.0499301	Haus1	All_Gio
ENSMUSG00000024151	11742.6	0.171951	0.0726957	0.0127471	0.0505796	Msh2	All_Gio
ENSMUSG00000062248	7960.94	0.247527	0.111468	0.0130767	0.0516141	Cks2	All_Gio
ENSMUSG00000020794	7905.54	0.269488	0.125058	0.0133055	0.0523654	Ube2g1	All_Gio
ENSMUSG00000020358	17446.9	0.163221	0.0693381	0.0133596	0.0525506	Hnrnpab	All_Gio
ENSMUSG00000020914	46292.9	-0.252394	0.116068	0.0141006	0.0548175	Top2a	All_Gio
ENSMUSG00000037474	12394.6	0.249188	0.114497	0.014495	0.0561174	Dtl	All_Gio
ENSMUSG00000026037	3384.23	0.195532	0.0862394	0.0146089	0.0564418	Orc2	All_Gio
ENSMUSG00000029191	8165.64	0.172503	0.0747086	0.014733	0.056848	Rfc1	All_Gio
ENSMUSG00000007570	905.77	0.23957	0.109573	0.0148128	0.057097	Fance	All_Gio
ENSMUSG00000038628	6514.66	0.240562	0.111989	0.0149966	0.0577014	Polr3k	All_Gio
ENSMUSG00000042590	6532.9	0.267759	0.128227	0.0155689	0.0594453	Ipo11	All_Gio
ENSMUSG00000029790	1455.11	-0.183625	0.0823132	0.0170845	0.0640564	Cep41	All_Gio
ENSMUSG00000028068	3314.9	-0.253614	0.123081	0.0174309	0.0651591	Iqgap3	All_Gio
ENSMUSG00000034601	1714.57	-0.218722	0.101638	0.0175072	0.0653629	2700049A03Rik	All_Gio
ENSMUSG00000028312	14718.6	-0.162381	0.0750698	0.0177965	0.0661461	Smc2	All_Gio
ENSMUSG00000021377	19767	-0.234986	0.113327	0.0188728	0.0692809	Dek	All_Gio
ENSMUSG00000079555	6248.07	0.245268	0.124355	0.0191229	0.0698965	Haus3	All_Gio
ENSMUSG00000019715	6371.83	0.120496	0.0532266	0.0191884	0.0700503	Gle1	All_Gio
ENSMUSG00000062822	2263.1	-0.211919	0.099487	0.0196396	0.0714189	4833420G17Rik	All_Gio
ENSMUSG00000034311	6158.28	-0.212755	0.0998575	0.0202735	0.0732439	Kif4	All_Gio
ENSMUSG00000024258	3972.22	0.204312	0.0971838	0.0216664	0.0772327	Polr2d	All_Gio
ENSMUSG00000001440	7079.04	0.157071	0.0718579	0.0218105	0.0776171	Kpnb1	All_Gio
ENSMUSG00000026873	981.596	-0.267974	0.13849	0.0219133	0.0779089	Phf19	All_Gio
ENSMUSG00000043091	10718.3	-0.149095	0.0679889	0.0219562	0.0780058	Tuba1c	All_Gio
ENSMUSG00000027811	4050.17	-0.216422	0.104656	0.0220814	0.0783379	4930579G24Rik	All_Gio
ENSMUSG00000026669	5729.67	0.135518	0.0617085	0.0224543	0.0792115	Mcm10	All_Gio
ENSMUSG00000023909	157.401	-0.377852	0.247308	0.0235553	0.0823392	Paqr4	All_Gio
ENSMUSG00000037313	21504.3	-0.172298	0.0806741	0.0246829	0.0854233	Tacc3	All_Gio
ENSMUSG00000024989	6907.27	-0.189562	0.0917905	0.0250347	0.0862026	Cep55	All_Gio
ENSMUSG00000033364	2482.93	-0.214432	0.105417	0.0253105	0.087032	Usp37	All_Gio
ENSMUSG00000044678	98.2316	0.435814	0.414801	0.0255103	0.0874579	Ly6k	All_Gio
ENSMUSG00000041219	6298.45	-0.225532	0.110705	0.0268127	0.0907594	Arhgap11a	All_Gio
ENSMUSG00000024833	9943	0.165377	0.0823045	0.0270246	0.0912912	Pola2	All_Gio
ENSMUSG00000020649	75909.6	-0.213942	0.104154	0.0270779	0.0914505	Rrm2	All_Gio
ENSMUSG00000020895	1113.5	0.168418	0.0808608	0.0271204	0.0915733	Tmem107	All_Gio
ENSMUSG00000056919	733.406	-0.236133	0.122652	0.0273596	0.0920904	Cep162	All_Gio
ENSMUSG00000024370	7289.53	-0.154389	0.0738681	0.0278807	0.0934453	Cdc23	All_Gio
ENSMUSG00000032221	2816.91	-0.196308	0.0985503	0.0280015	0.0937242	Mns1	All_Gio
ENSMUSG00000022033	22863.3	-0.205238	0.104895	0.0283577	0.0945363	Pbk	All_Gio
ENSMUSG00000055184	658.766	0.252283	0.135583	0.0286121	0.0949824	Fam72a	All_Gio
ENSMUSG00000019845	1760.84	-0.185182	0.0941818	0.030663	0.100133	Tube1	All_Gio
ENSMUSG00000022945	9471.44	0.213685	0.110016	0.0307286	0.100297	Chaf1b	All_Gio
ENSMUSG00000003779	10414.7	-0.109843	0.0519571	0.0308421	0.100536	Kif20a	All_Gio
ENSMUSG00000033952	3457.05	-0.255639	0.144173	0.0311665	0.101394	Aspm	All_Gio
ENSMUSG00000030662	11936.6	0.231721	0.125024	0.0315409	0.102301	Ipo5	All_Gio
ENSMUSG00000020235	11015	-0.19651	0.102947	0.0316426	0.102542	Fzr1	All_Gio
ENSMUSG00000041498	609.634	-0.239954	0.131928	0.0325552	0.104864	Kif14	All_Gio
ENSMUSG00000027823	11363.7	0.178903	0.0889811	0.0326131	0.104923	Gmps	All_Gio
ENSMUSG00000039048	3694.06	0.135485	0.0659374	0.0329674	0.105715	Foxred1	All_Gio
ENSMUSG00000007646	1155	-0.170102	0.0858968	0.0335338	0.107164	Rad51c	All_Gio
ENSMUSG00000037991	1890.57	0.214132	0.113727	0.0340704	0.108433	Rmi2	All_Gio
ENSMUSG00000029177	14012.1	-0.148326	0.0736327	0.0342505	0.108896	Cenpa	All_Gio
ENSMUSG00000041491	2845.52	0.162073	0.0815936	0.0346028	0.10969	Cep78	All_Gio
ENSMUSG00000062075	6946.6	-0.156002	0.0784224	0.034985	0.110663	Lmnb2	All_Gio
ENSMUSG00000035726	5655.26	0.201056	0.105772	0.0351421	0.111071	Supt16	All_Gio
ENSMUSG00000006585	5693.22	0.211438	0.114916	0.0357002	0.112399	Cdt1	All_Gio
ENSMUSG00000020330	9690.69	-0.137031	0.0684679	0.03653	0.114443	Hmmr	All_Gio
ENSMUSG00000036223	2624.66	-0.181827	0.0969985	0.0400843	0.123607	Ska1	All_Gio
ENSMUSG00000060639	410.849	0.215507	0.120638	0.0404635	0.124442	Hist1h4i	All_Gio
ENSMUSG00000031629	489.962	-0.236701	0.138046	0.0419241	0.127694	Cenpu	All_Gio
ENSMUSG00000027323	10911.9	0.179928	0.0969341	0.0420771	0.128018	Rad51	All_Gio
ENSMUSG00000023908	3085.52	-0.183263	0.100333	0.043713	0.132161	Pkmyt1	All_Gio
ENSMUSG00000059060	545.222	0.219711	0.12661	0.0443974	0.13349	Rad51b	All_Gio
ENSMUSG00000027285	2850.17	0.18595	0.102163	0.0450149	0.134739	Haus2	All_Gio
ENSMUSG00000027018	14128.1	0.197112	0.109727	0.047216	0.139514	Hat1	All_Gio
ENSMUSG00000021175	5817.5	0.157351	0.0841206	0.0477367	0.140617	Cdca7l	All_Gio
ENSMUSG00000017550	2792.47	-0.167663	0.0923725	0.0492367	0.144008	Atad5	All_Gio
ENSMUSG00000031371	2927.97	-0.155926	0.082014	0.0498038	0.145175	Haus7	All_Gio
ENSMUSG00000056394	19989.1	-0.141095	0.0763548	0.0512924	0.148397	Lig1	All_Gio
ENSMUSG00000021537	6608.21	0.182216	0.102525	0.0514415	0.148685	Cetn3	All_Gio
ENSMUSG00000005233	13315.7	-0.192394	0.111986	0.054044	0.154173	Spc25	All_Gio
ENSMUSG00000033036	103.156	0.277123	0.194526	0.0541869	0.154503	Gm7879	All_Gio
ENSMUSG00000024817	5553.34	-0.17908	0.102823	0.0542747	0.154694	Uhrf2	All_Gio
ENSMUSG00000027184	34076	0.205143	0.122851	0.0550857	0.156392	Caprin1	All_Gio
ENSMUSG00000022314	13465	-0.180101	0.097171	0.0553945	0.156841	Rad21	All_Gio
ENSMUSG00000000568	26049.3	0.153777	0.0778293	0.0576663	0.161653	Hnrnpd	All_Gio
ENSMUSG00000021965	4015.23	-0.170537	0.0988488	0.0584815	0.163182	Ska3	All_Gio
ENSMUSG00000029414	3104.73	-0.247416	0.168432	0.0586199	0.163409	Kntc1	All_Gio
ENSMUSG00000045273	2663.46	-0.188941	0.113379	0.0596892	0.16562	Cenph	All_Gio
ENSMUSG00000024260	868.855	-0.195627	0.118878	0.0605083	0.166933	Sap130	All_Gio
ENSMUSG00000033111	713.99	-0.194408	0.118665	0.0615033	0.168931	3830406C13Rik	All_Gio
ENSMUSG00000069306	41.9229	-0.301926	0.297449	0.0620994	0.170194	Hist1h4m	All_Gio
ENSMUSG00000047246	261.662	-0.268301	0.20377	0.0622722	0.170548	Hist1h2be	All_Gio
ENSMUSG00000031756	6312.18	0.148003	0.0846285	0.0624759	0.171038	Cenpn	All_Gio
ENSMUSG00000043065	1307.83	-0.180904	0.109039	0.0626809	0.171442	Spice1	All_Gio
ENSMUSG00000061607	522.65	-0.269254	0.209289	0.0648241	0.175745	Mdc1	All_Gio
ENSMUSG00000029676	3737.48	-0.132114	0.0759127	0.0688448	0.183672	Pot1a	All_Gio
ENSMUSG00000029687	17036.5	-0.133837	0.0775533	0.0695644	0.184933	Ezh2	All_Gio
ENSMUSG00000032113	4022.94	0.174617	0.108078	0.0711175	0.187927	Chek1	All_Gio
ENSMUSG00000024301	284.27	-0.23734	0.170251	0.0720779	0.189795	Kifc5b	All_Gio
ENSMUSG00000028282	3961.31	0.188993	0.120911	0.0732114	0.19197	Casp8ap2	All_Gio
ENSMUSG00000037461	8184.26	0.165956	0.102303	0.0736287	0.192779	Ints7	All_Gio
ENSMUSG00000021707	5206.86	0.159965	0.098702	0.0743304	0.19419	Dhfr	All_Gio
ENSMUSG00000040195	1114.06	-0.252563	0.196726	0.0745785	0.194725	Nemp1	All_Gio
ENSMUSG00000049539	371.995	0.245929	0.188656	0.0757506	0.196858	Hist1h1a	All_Gio
ENSMUSG00000051768	5910.81	-0.138723	0.0842867	0.0779596	0.200833	Xrcc1	All_Gio
ENSMUSG00000026355	63934.1	0.113419	0.0680747	0.0783185	0.201377	Mcm6	All_Gio
ENSMUSG00000028884	15291.2	0.163493	0.103086	0.0784097	0.201508	Rpa2	All_Gio
ENSMUSG00000032939	12603.2	0.12489	0.0752351	0.0808368	0.206013	Nup93	All_Gio
ENSMUSG00000058729	2273.72	-0.167492	0.107408	0.0815132	0.207218	Lin9	All_Gio
ENSMUSG00000038215	1300.08	-0.189943	0.127062	0.0815665	0.207308	Cep44	All_Gio
ENSMUSG00000027490	2996.47	-0.127087	0.0773599	0.0824557	0.209106	E2f1	All_Gio
ENSMUSG00000021929	9260.18	0.214764	0.155765	0.0828771	0.209875	Kpna3	All_Gio
ENSMUSG00000026662	9255.65	-0.104605	0.0635505	0.0831498	0.210261	Sephs1	All_Gio
ENSMUSG00000029003	1852.5	0.13957	0.0867421	0.0855296	0.214325	Mad2l2	All_Gio
ENSMUSG00000071078	45.0527	0.265037	0.268983	0.0857561	0.214605	Nr2c2ap	All_Gio
ENSMUSG00000040044	7733.58	0.132496	0.083682	0.0864225	0.21584	Orc3	All_Gio
ENSMUSG00000028044	14823	0.0900479	0.054748	0.0868921	0.216652	Cks1b	All_Gio
ENSMUSG00000019214	4106.41	-0.133715	0.0844914	0.0870731	0.216834	Chtf18	All_Gio
ENSMUSG00000040084	25148	-0.103169	0.0669897	0.0886332	0.219753	Bub1b	All_Gio
ENSMUSG00000039231	7091.31	0.0960308	0.059526	0.09719	0.234206	Suv39h1	All_Gio
ENSMUSG00000026239	2643.57	-0.155439	0.107601	0.0990956	0.237547	Pde6d	All_Gio
ENSMUSG00000054717	94656.4	-0.129504	0.0948421	0.102328	0.242655	Hmgb2	All_Gio
ENSMUSG00000022391	11387.7	0.099538	0.0646743	0.102927	0.243681	Rangap1	All_Gio
ENSMUSG00000046591	1546.85	-0.188005	0.1379	0.106292	0.249057	Ticrr	All_Gio
ENSMUSG00000006398	22368.4	-0.139007	0.0930479	0.10642	0.249279	Cdc20	All_Gio
ENSMUSG00000074476	9524.57	-0.115709	0.0755519	0.106777	0.24992	Spc24	All_Gio
ENSMUSG00000015749	34964.4	-0.104279	0.0721787	0.106983	0.250205	Anp32e	All_Gio
ENSMUSG00000027959	1200.11	0.181789	0.133199	0.107883	0.251722	Sass6	All_Gio
ENSMUSG00000047044	2042.04	0.147855	0.101689	0.10923	0.253992	D030056L22Rik	All_Gio
ENSMUSG00000031691	1097.07	-0.192041	0.146051	0.109429	0.254298	Tnpo2	All_Gio
ENSMUSG00000023066	851.749	-0.223616	0.198671	0.109776	0.254794	Rttn	All_Gio
ENSMUSG00000030929	705.646	-0.180101	0.12895	0.11272	0.259888	Eri2	All_Gio
ENSMUSG00000020492	2366.73	-0.174521	0.129124	0.113432	0.260986	Ska2	All_Gio
ENSMUSG00000066979	25969.1	-0.0966777	0.065276	0.113696	0.261456	Bub3	All_Gio
ENSMUSG00000033222	3620.3	0.117501	0.0796164	0.114007	0.261929	Ttf2	All_Gio
ENSMUSG00000046111	971.515	-0.185533	0.142507	0.115273	0.263907	Cep295	All_Gio
ENSMUSG00000032249	1863.66	0.211126	0.175245	0.116329	0.26528	Anp32a	All_Gio
ENSMUSG00000030254	5529.57	0.11605	0.0781154	0.117523	0.266774	Rad18	All_Gio
ENSMUSG00000027650	2870.49	-0.141822	0.102234	0.120466	0.271521	Tti1	All_Gio
ENSMUSG00000099517	54.0885	-0.213892	0.283231	0.120993	0.272462	Hist1h3g	All_Gio
ENSMUSG00000035842	2364.1	-0.128822	0.0891159	0.121441	0.273264	Ddx11	All_Gio
ENSMUSG00000006715	8675.4	0.131733	0.0918955	0.122465	0.274868	Gmnn	All_Gio
ENSMUSG00000033596	9199.51	-0.193425	0.157283	0.12309	0.275732	Rfwd3	All_Gio
ENSMUSG00000022863	798.907	0.154401	0.114232	0.126458	0.281008	Btg3	All_Gio
ENSMUSG00000038225	430.697	-0.169913	0.131302	0.127184	0.282077	Primpol	All_Gio
ENSMUSG00000026708	4597.86	-0.135567	0.0987743	0.13151	0.288635	Cenpl	All_Gio
ENSMUSG00000039994	5046.56	0.10286	0.0714064	0.132843	0.290411	Timeless	All_Gio
ENSMUSG00000020899	1628.27	0.148623	0.111536	0.134223	0.29283	Pfas	All_Gio
ENSMUSG00000001525	67884.2	0.107103	0.0751905	0.134885	0.293889	Tubb5	All_Gio
ENSMUSG00000048799	2146	-0.177243	0.144036	0.135037	0.29405	Cep120	All_Gio
ENSMUSG00000027067	37726.3	0.0859759	0.059249	0.135218	0.294272	Ssrp1	All_Gio
ENSMUSG00000029730	41325.9	0.101315	0.0715612	0.138243	0.298858	Mcm7	All_Gio
ENSMUSG00000032397	18844.1	0.153895	0.116342	0.138587	0.299234	Tipin	All_Gio
ENSMUSG00000026646	1055.07	0.148852	0.113991	0.1397	0.300619	Suv39h2	All_Gio
ENSMUSG00000024542	2269.59	-0.18731	0.162579	0.139982	0.301052	Cep192	All_Gio
ENSMUSG00000069308	33.7906	0.191572	0.278481	0.140817	0.30224	Hist1h2bp	All_Gio
ENSMUSG00000025066	8848.53	0.12408	0.0933232	0.141119	0.302716	Sfr1	All_Gio
ENSMUSG00000060860	8968.23	-0.140577	0.109438	0.142502	0.304852	Ube2s	All_Gio
ENSMUSG00000020471	10629.5	0.145472	0.105079	0.143602	0.306724	Pold2	All_Gio
ENSMUSG00000025872	6170.49	0.117896	0.0870858	0.144717	0.307904	Thoc3	All_Gio
ENSMUSG00000036768	6435.78	-0.121749	0.0876035	0.145165	0.30861	Kif15	All_Gio
ENSMUSG00000022960	2441.35	-0.151133	0.113168	0.146561	0.310243	Donson	All_Gio
ENSMUSG00000057406	8948.79	-0.135578	0.10781	0.146963	0.310888	Nsd2	All_Gio
ENSMUSG00000020493	2025.62	-0.147655	0.117088	0.150065	0.315931	Prr11	All_Gio
ENSMUSG00000035439	2572.51	-0.139828	0.108556	0.151577	0.317774	Haus8	All_Gio
ENSMUSG00000036403	911.362	-0.178558	0.157473	0.153556	0.320042	Cep135	All_Gio
ENSMUSG00000004099	28911.2	-0.122241	0.101119	0.154088	0.32075	Dnmt1	All_Gio
ENSMUSG00000028484	11898.4	0.1274	0.0973278	0.154189	0.320787	Psip1	All_Gio
ENSMUSG00000033762	934.271	0.14762	0.118531	0.154137	0.320787	Recql4	All_Gio
ENSMUSG00000026039	726.063	-0.152865	0.124447	0.155082	0.321789	Sgo2a	All_Gio
ENSMUSG00000047757	1512.36	0.165096	0.140535	0.157291	0.325201	Fancb	All_Gio
ENSMUSG00000029782	6172.62	0.126018	0.0974107	0.157644	0.325752	Tmem209	All_Gio
ENSMUSG00000001228	40932.2	-0.110421	0.0842043	0.160984	0.330599	Uhrf1	All_Gio
ENSMUSG00000032400	1689.65	0.110007	0.0843194	0.162813	0.332985	Zwilch	All_Gio
ENSMUSG00000020739	13581.4	0.115417	0.0918918	0.163897	0.334335	Nup85	All_Gio
ENSMUSG00000005566	20570.6	0.120198	0.0937595	0.164421	0.334949	Trim28	All_Gio
ENSMUSG00000047534	6398.37	-0.152017	0.129434	0.167435	0.338922	Mis18bp1	All_Gio
ENSMUSG00000068394	1206.12	-0.173505	0.168511	0.174182	0.348077	Cep152	All_Gio
ENSMUSG00000026999	2996.63	0.137402	0.114857	0.174293	0.34819	Nup35	All_Gio
ENSMUSG00000031262	4840.28	-0.102216	0.0800255	0.174773	0.34887	Cenpi	All_Gio
ENSMUSG00000034021	6051.85	-0.164236	0.134164	0.17811	0.353646	Pds5b	All_Gio
ENSMUSG00000022385	5328.69	-0.0975118	0.0765621	0.178774	0.354588	Gtse1	All_Gio
ENSMUSG00000021115	9418.57	0.0927784	0.072853	0.180045	0.356198	Vrk1	All_Gio
ENSMUSG00000050628	1043.4	-0.140856	0.121668	0.180823	0.357091	Ubald2	All_Gio
ENSMUSG00000037894	93606.5	0.112533	0.0917549	0.185232	0.362833	H2afz	All_Gio
ENSMUSG00000012443	26860.7	-0.132397	0.115112	0.185334	0.362889	Kif11	All_Gio
ENSMUSG00000041298	622.584	0.151194	0.137767	0.187167	0.365309	Katnal1	All_Gio
ENSMUSG00000037020	1839.22	-0.1534	0.141844	0.188245	0.366875	Wdr62	All_Gio
ENSMUSG00000026429	3075.24	-0.124567	0.106081	0.190029	0.369233	Ube2t	All_Gio
ENSMUSG00000015880	12467.1	-0.115642	0.105733	0.190968	0.37048	Ncapg	All_Gio
ENSMUSG00000001403	19956.3	0.0813193	0.0607405	0.191953	0.371596	Ube2c	All_Gio
ENSMUSG00000028614	6375.13	0.15662	0.132382	0.194532	0.374822	Ndc1	All_Gio
ENSMUSG00000050555	999.968	-0.133632	0.118325	0.195197	0.375794	Hyls1	All_Gio
ENSMUSG00000044201	2648.24	-0.119514	0.100817	0.196699	0.378024	Cdc25c	All_Gio
ENSMUSG00000039187	2826.14	-0.109614	0.0935083	0.200646	0.38325	Fanci	All_Gio
ENSMUSG00000038544	6729.5	0.0620353	0.0501701	0.205575	0.389978	Inip	All_Gio
ENSMUSG00000000759	3649.26	-0.119859	0.105102	0.206722	0.391459	Tubgcp3	All_Gio
ENSMUSG00000022422	2178.69	-0.121481	0.111957	0.208977	0.394533	Dscc1	All_Gio
ENSMUSG00000018362	55891.5	0.109789	0.0942642	0.20922	0.394842	Kpna2	All_Gio
ENSMUSG00000022978	4575.5	0.125567	0.113312	0.210159	0.395973	Mis18a	All_Gio
ENSMUSG00000033752	972.835	0.130888	0.119975	0.211275	0.397352	Mnd1	All_Gio
ENSMUSG00000041147	1800.79	0.115011	0.101741	0.213456	0.399714	Brca2	All_Gio
ENSMUSG00000020171	2824.31	0.0986792	0.0852225	0.216751	0.40438	Yeats4	All_Gio
ENSMUSG00000024974	13180.5	-0.0812288	0.0672674	0.218541	0.406793	Smc3	All_Gio
ENSMUSG00000025358	10200.9	-0.0941424	0.08043	0.219171	0.407561	Cdk2	All_Gio
ENSMUSG00000019988	3688.92	-0.117702	0.100032	0.221647	0.410737	Nedd1	All_Gio
ENSMUSG00000035683	5194.8	-0.0918793	0.0793489	0.222701	0.411696	Melk	All_Gio
ENSMUSG00000003778	14889.9	-0.0816153	0.0665674	0.222812	0.411757	Brd8	All_Gio
ENSMUSG00000015478	951.089	-0.10405	0.0960502	0.232497	0.423609	Rnf5	All_Gio
ENSMUSG00000040549	10869.5	-0.135008	0.135365	0.233016	0.424348	Ckap5	All_Gio
ENSMUSG00000029363	11264.3	0.0937823	0.082047	0.235843	0.427987	Rfc5	All_Gio
[truncated: 11,952 more rows]
